# Supplementary material for: Integrative multi-omics profiling reveals cAMP-independent mechanisms regulating hyphal morphogenesis in Candida albicans
Source: PLoS Pathog. 2021 Aug 16;17(8):e1009861. doi: 10.1371/journal.ppat.1009861 (PMC8389844; doi:10.1371/journal.ppat.1009861)
Supplement: S1 Data — (XLSX) [file ppat.1009861.s012.xlsx]

## Sheet: Readme
SnpEff generated a table having counts of number of variants affecting each transcript and gene. It used a custom built database based on the C. albicans SC5314 genome (Assembly 21)
The columns in this table are:
Column name	Meaning
GeneName	Gene name (usually HUGO)
GeneId	Gene's ID
TranscriptId	Transcript's ID
BioType	Transcript's bio-type (if available)
	The following column is repeated for each impact {HIGH, MODERATE, LOW, MODIFIER}
variants_impact	Count number of variants for each impact category
	The following column is repeated for each annotated effect (e.g. missense_variant, synonymous_variant, stop_lost, etc.)
variants_effect	Count number of variants for each effect type
	The following columns are repeated for several genomic regions (DOWNSTREAM, EXON, INTRON, UPSTREAM, etc.)
bases_affected	Number of bases that variants overlap genomic region
total_score	Sum of scores overlapping this genomic region. Note: Scores are only available when input files are type 'BED' (e.g. when annotating ChipSeq experiments)
length	Genomic region length

## Sheet: snpEff_genes
#GeneName	GeneId	TranscriptId	BioType	variants_impact_HIGH	variants_impact_LOW	variants_impact_MODERATE	variants_impact_MODIFIER	variants_effect_disruptive_inframe_deletion	variants_effect_disruptive_inframe_insertion	variants_effect_downstream_gene_variant	variants_effect_frameshift_variant	variants_effect_inframe_deletion	variants_effect_inframe_insertion	variants_effect_initiator_codon_variant	variants_effect_intron_variant	variants_effect_missense_variant	variants_effect_splice_acceptor_variant	variants_effect_splice_donor_variant	variants_effect_splice_region_variant	variants_effect_start_lost	variants_effect_stop_gained	variants_effect_stop_lost	variants_effect_stop_retained_variant	variants_effect_synonymous_variant	variants_effect_upstream_gene_variant
CD39-T-E1	CD39-T	CD39-T		0	0	0	247	0	0	134	0	0	0	0	0	0	0	0	0	0	0	0	0	0	113
CaalfMp01-T-E1	CaalfMp01-T	CaalfMp01-T		0	9	1	160	0	0	116	0	0	0	0	0	1	0	0	0	0	0	0	0	9	44
CaalfMp02-T-E1	CaalfMp02-T	CaalfMp02-T		0	3	1	176	0	0	121	0	0	0	0	0	1	0	0	0	0	0	0	0	3	55
CaalfMp03-T-E1	CaalfMp03-T	CaalfMp03-T		0	6	2	180	0	0	121	0	0	0	0	0	2	0	0	0	0	0	0	0	6	59
CaalfMp04-T-E1	CaalfMp04-T	CaalfMp04-T		0	5	1	202	0	0	125	0	0	0	0	0	1	0	0	0	0	0	0	0	5	77
CaalfMp05-T-E1	CaalfMp05-T	CaalfMp05-T		0	0	0	162	0	0	59	0	0	0	0	0	0	0	0	0	0	0	0	0	0	103
CaalfMp06-T-E1	CaalfMp06-T	CaalfMp06-T		0	8	3	158	0	0	52	0	0	0	0	0	3	0	0	0	0	0	0	0	8	106
CaalfMp07-T-E1	CaalfMp07-T	CaalfMp07-T		0	0	0	167	0	0	55	0	0	0	0	0	0	0	0	0	0	0	0	0	0	112
CaalfMp08-T-E1	CaalfMp08-T	CaalfMp08-T		0	23	1	243	0	0	78	0	0	0	0	109	1	0	0	2	0	0	0	0	21	58
CaalfMp08.1-T-E1	CaalfMp08.1-T	CaalfMp08.1-T		3	16	28	148	0	0	90	3	0	0	0	0	28	0	0	0	0	1	0	0	16	58
CaalfMp08.2-T-E1	CaalfMp08.2-T	CaalfMp08.2-T		0	18	7	186	0	0	80	0	0	0	0	49	7	0	0	1	0	0	0	0	17	58
CaalfMp08.3-T-E1	CaalfMp08.3-T	CaalfMp08.3-T		0	18	8	204	0	0	77	0	0	0	0	71	8	0	0	2	0	0	0	0	16	58
CaalfMp08.4-T-E1	CaalfMp08.4-T	CaalfMp08.4-T		0	14	11	231	0	0	87	0	0	0	0	88	11	0	0	2	0	0	0	0	12	58
CaalfMp09-T-E1	CaalfMp09-T	CaalfMp09-T		0	12	7	143	0	0	57	0	0	0	0	0	7	0	0	0	0	0	0	0	12	86
CaalfMp10-T-E1	CaalfMp10-T	CaalfMp10-T		0	1	2	138	0	0	56	0	0	0	0	0	2	0	0	0	0	0	0	0	1	82
CaalfMp11-T-E1	CaalfMp11-T	CaalfMp11-T		0	7	0	163	0	0	54	0	0	0	0	32	0	0	0	0	0	0	0	0	7	77
CaalfMp11.1-T-E1	CaalfMp11.1-T	CaalfMp11.1-T		1	10	24	122	0	0	45	0	0	0	0	0	24	0	0	0	0	1	0	0	10	77
CaalfMp12-T-E1	CaalfMp12-T	CaalfMp12-T		0	0	1	109	0	0	47	0	0	0	0	0	1	0	0	0	0	0	0	0	0	62
CaalfMp13-T-E1	CaalfMp13-T	CaalfMp13-T		0	15	2	105	0	0	44	0	0	0	0	0	2	0	0	0	0	0	0	0	15	61
CaalfMp14-T-E1	CaalfMp14-T	CaalfMp14-T		0	7	1	120	0	0	61	0	0	0	0	0	1	0	0	0	0	0	0	0	7	59
CaalfMp15-T-E1	CaalfMp15-T	CaalfMp15-T		0	5	1	156	0	0	109	0	0	0	0	0	1	0	0	0	0	0	0	0	5	47
CaalfMr16-T-E1	CaalfMr16-T	CaalfMr16-T		8	8	26	116	0	0	116	5	0	0	0	0	26	0	0	0	0	2	1	0	8	0
CaalfMr17-T-E1	CaalfMr17-T	CaalfMr17-T		0	1	2	131	0	0	64	0	0	0	0	0	2	0	0	0	0	0	0	1	0	67
CaalfMt18-T-E1	CaalfMt18-T	CaalfMt18-T		0	0	0	158	0	0	114	0	0	0	0	0	0	0	0	0	0	0	0	0	0	44
CaalfMt19-T-E1	CaalfMt19-T	CaalfMt19-T		0	0	0	170	0	0	116	0	0	0	0	0	0	0	0	0	0	0	0	0	0	54
CaalfMt20-T-E1	CaalfMt20-T	CaalfMt20-T		0	0	0	192	0	0	116	0	0	0	0	0	0	0	0	0	0	0	0	0	0	76
CaalfMt21-T-E1	CaalfMt21-T	CaalfMt21-T		0	0	0	195	0	0	94	0	0	0	0	0	0	0	0	0	0	0	0	0	0	101
CaalfMt22-T-E1	CaalfMt22-T	CaalfMt22-T		0	0	0	191	0	0	94	0	0	0	0	0	0	0	0	0	0	0	0	0	0	97
CaalfMt23-T-E1	CaalfMt23-T	CaalfMt23-T		0	0	0	188	0	0	95	0	0	0	0	0	0	0	0	0	0	0	0	0	0	93
CaalfMt24-T-E1	CaalfMt24-T	CaalfMt24-T		0	0	0	182	0	0	96	0	0	0	0	0	0	0	0	0	0	0	0	0	0	86
CaalfMt25-T-E1	CaalfMt25-T	CaalfMt25-T		0	0	0	177	0	0	97	0	0	0	0	0	0	0	0	0	0	0	0	0	0	80
CaalfMt26-T-E1	CaalfMt26-T	CaalfMt26-T		0	0	0	155	0	0	51	0	0	0	0	0	0	0	0	0	0	0	0	0	0	104
CaalfMt27-T-E1	CaalfMt27-T	CaalfMt27-T		0	0	0	166	0	0	54	0	0	0	0	0	0	0	0	0	0	0	0	0	0	112
CaalfMt28-T-E1	CaalfMt28-T	CaalfMt28-T		0	0	0	162	0	0	52	0	0	0	0	0	0	0	0	0	0	0	0	0	0	110
CaalfMt29-T-E1	CaalfMt29-T	CaalfMt29-T		0	0	0	161	0	0	51	0	0	0	0	0	0	0	0	0	0	0	0	0	0	110
CaalfMt30-T-E1	CaalfMt30-T	CaalfMt30-T		0	0	1	177	0	0	76	0	0	0	0	0	1	0	0	0	0	0	0	0	0	101
CaalfMt31-T-E1	CaalfMt31-T	CaalfMt31-T		0	0	0	173	0	0	74	0	0	0	0	0	0	0	0	0	0	0	0	0	0	99
CaalfMt32-T-E1	CaalfMt32-T	CaalfMt32-T		0	0	0	169	0	0	74	0	0	0	0	0	0	0	0	0	0	0	0	0	0	95
CaalfMt33-T-E1	CaalfMt33-T	CaalfMt33-T		0	0	0	164	0	0	74	0	0	0	0	0	0	0	0	0	0	0	0	0	0	90
CaalfMt34-T-E1	CaalfMt34-T	CaalfMt34-T		0	0	0	160	0	0	74	0	0	0	0	0	0	0	0	0	0	0	0	0	0	86
CaalfMt35-T-E1	CaalfMt35-T	CaalfMt35-T		0	0	0	127	0	0	59	0	0	0	0	0	0	0	0	0	0	0	0	0	0	68
CaalfMt36-T-E1	CaalfMt36-T	CaalfMt36-T		0	0	0	99	0	0	47	0	0	0	0	0	0	0	0	0	0	0	0	0	0	52
CaalfMt37-T-E1	CaalfMt37-T	CaalfMt37-T		0	0	0	99	0	0	47	0	0	0	0	0	0	0	0	0	0	0	0	0	0	52
CaalfMt38-T-E1	CaalfMt38-T	CaalfMt38-T		0	0	0	103	0	0	51	0	0	0	0	0	0	0	0	0	0	0	0	0	0	52
CaalfMt39-T-E1	CaalfMt39-T	CaalfMt39-T		0	0	0	110	0	0	51	0	0	0	0	0	0	0	0	0	0	0	0	0	0	59
CaalfMt40-T-E1	CaalfMt40-T	CaalfMt40-T		0	0	0	110	0	0	51	0	0	0	0	0	0	0	0	0	0	0	0	0	0	59
CaalfMt41-T-E1	CaalfMt41-T	CaalfMt41-T		0	0	0	125	0	0	61	0	0	0	0	0	0	0	0	0	0	0	0	0	0	64
CaalfMt42-T-E1	CaalfMt42-T	CaalfMt42-T		0	0	0	136	0	0	55	0	0	0	0	0	0	0	0	0	0	0	0	0	0	81
CaalfMt43-T-E1	CaalfMt43-T	CaalfMt43-T		0	0	0	141	0	0	55	0	0	0	0	0	0	0	0	0	0	0	0	0	0	86
CaalfMt44-T-E1	CaalfMt44-T	CaalfMt44-T		0	0	0	147	0	0	54	0	0	0	0	0	0	0	0	0	0	0	0	0	0	93
CaalfMt45-T-E1	CaalfMt45-T	CaalfMt45-T		0	0	0	151	0	0	54	0	0	0	0	0	0	0	0	0	0	0	0	0	0	97
CaalfMt46-T-E1	CaalfMt46-T	CaalfMt46-T		0	0	0	147	0	0	47	0	0	0	0	0	0	0	0	0	0	0	0	0	0	100
CaalfMt47-T-E1	CaalfMt47-T	CaalfMt47-T		0	0	0	158	0	0	111	0	0	0	0	0	0	0	0	0	0	0	0	0	0	47
ITS1-T-E1	ITS1-T	ITS1-T		1	1	0	164	0	0	67	1	0	0	0	0	0	0	0	0	0	0	1	0	1	97
ITS2-T-E1	ITS2-T	ITS2-T		0	1	2	168	0	0	69	0	0	0	0	0	2	0	0	0	0	0	0	0	1	99
LSU-C2809-T-E1	LSU-C2809-T	LSU-C2809-T		0	1	0	277	0	0	124	0	0	0	0	0	0	0	0	0	0	0	0	0	1	153
LSU-G1431-T-E1	LSU-G1431-T	LSU-G1431-T		0	1	1	300	0	0	164	0	0	0	0	0	1	0	0	0	0	0	0	1	0	136
RDN18-T-E1	RDN18-T	RDN18-T		0	1	4	204	0	0	66	0	0	0	0	0	4	0	0	0	0	0	0	0	1	138
RDN25-T-E1	RDN25-T	RDN25-T		7	4	8	225	0	0	123	7	0	0	0	0	8	0	0	0	0	2	0	0	4	102
RDN5-T-E1	RDN5-T	RDN5-T		0	0	0	254	0	0	154	0	0	0	0	0	0	0	0	0	0	0	0	0	0	100
RDN58-T-E1	RDN58-T	RDN58-T		0	0	1	168	0	0	69	0	0	0	0	0	1	0	0	0	0	0	0	0	0	99
RPR1-T-E1	RPR1-T	RPR1-T		0	1	0	218	0	0	96	0	0	0	0	0	0	0	0	0	0	0	0	0	1	122
SCR1-T-E1	SCR1-T	SCR1-T		1	2	3	105	0	0	42	1	0	0	0	0	3	0	0	0	0	0	0	0	2	63
SNRNAU1-T-E1	SNRNAU1-T	SNRNAU1-T		0	0	1	396	0	0	141	0	0	0	0	0	1	0	0	0	0	0	0	0	0	255
SNRNAU2-T-E1	SNRNAU2-T	SNRNAU2-T		0	0	1	213	0	0	128	0	0	0	0	0	1	0	0	0	0	0	0	0	0	85
SNRNAU4-T-E1	SNRNAU4-T	SNRNAU4-T		0	0	2	289	0	0	156	0	0	0	0	0	2	0	0	0	0	0	0	0	0	133
SNRNAU5-T-E1	SNRNAU5-T	SNRNAU5-T		0	2	2	311	0	0	214	0	0	0	0	0	2	0	0	0	0	0	0	0	2	97
SNRNAU6-T-E1	SNRNAU6-T	SNRNAU6-T		1	0	0	227	0	0	94	1	0	0	0	0	0	0	0	0	0	0	0	0	0	133
TER1-T-E1	TER1-T	TER1-T		2	2	6	154	0	0	120	2	0	0	0	0	6	0	0	0	0	0	0	0	2	34
orf19.10-T-E1	orf19.10-T	orf19.10-T		0	10	3	323	0	0	148	0	0	0	0	0	3	0	0	0	0	0	0	0	10	175
orf19.100-T-E1	orf19.100-T	orf19.100-T		2	105	20	1606	0	0	650	2	0	0	0	0	20	0	0	0	0	0	0	0	105	956
orf19.1002-T-E1	orf19.1002-T	orf19.1002-T		0	8	15	511	0	0	312	0	0	0	0	0	15	0	0	0	0	0	0	0	8	199
orf19.1005-T-E1	orf19.1005-T	orf19.1005-T		3	9	35	376	0	0	169	1	0	0	0	0	35	0	0	0	1	1	0	0	9	207
orf19.1007-T-E1	orf19.1007-T	orf19.1007-T		0	13	5	366	0	0	195	0	0	0	0	0	5	0	0	0	0	0	0	0	13	171
orf19.1008-T-E1	orf19.1008-T	orf19.1008-T		7	6	16	294	1	2	155	6	1	0	0	0	12	0	0	0	0	1	0	0	6	139
orf19.1009-T-E1	orf19.1009-T	orf19.1009-T		6	2	7	284	1	0	149	4	0	0	0	0	6	0	0	0	1	1	0	0	2	135
orf19.101-T-E1	orf19.101-T	orf19.101-T		0	78	19	1868	1	2	1146	0	0	0	0	0	16	0	0	0	0	0	0	0	78	722
orf19.1010-T-E1	orf19.1010-T	orf19.1010-T		0	13	14	324	0	0	138	0	0	0	0	0	14	0	0	0	0	0	0	0	13	186
orf19.1011-T-E1	orf19.1011-T	orf19.1011-T		0	25	9	361	0	1	201	0	0	0	0	0	8	0	0	0	0	0	0	0	25	160
orf19.1012-T-E1	orf19.1012-T	orf19.1012-T		0	7	2	285	0	0	139	0	0	0	0	0	2	0	0	0	0	0	0	0	7	146
orf19.102-T-E1	orf19.102-T	orf19.102-T		0	153	50	1811	0	0	746	0	0	0	0	0	50	0	0	1	0	0	0	1	152	1065
orf19.1026-T-E1	orf19.1026-T	orf19.1026-T		0	9	11	344	0	0	167	0	0	0	0	0	11	0	0	0	0	0	0	0	9	177
orf19.1026.1-T-E1	orf19.1026.1-T	orf19.1026.1-T		1	6	4	336	0	0	160	1	0	0	0	0	4	0	0	0	1	0	0	0	6	176
orf19.1027-T-E1	orf19.1027-T	orf19.1027-T		0	13	16	368	0	0	179	0	0	0	0	0	16	0	0	0	0	0	0	0	13	189
orf19.1028-T-E1	orf19.1028-T	orf19.1028-T		0	9	16	368	1	0	190	0	2	0	0	0	13	0	0	0	0	0	0	0	9	178
orf19.1029-T-E1	orf19.1029-T	orf19.1029-T		0	17	6	355	0	1	167	0	1	0	0	0	4	0	0	0	0	0	0	0	17	188
orf19.103-T-E1	orf19.103-T	orf19.103-T		2	68	21	1748	0	0	933	2	0	0	0	0	21	0	0	2	0	0	1	1	67	815
orf19.1030-T-E1	orf19.1030-T	orf19.1030-T		2	8	17	348	2	1	153	2	0	2	0	0	12	0	0	0	0	0	0	0	8	195
orf19.1031-T-E1	orf19.1031-T	orf19.1031-T		0	53	8	357	1	0	165	0	2	1	0	0	4	0	0	0	0	0	0	0	53	192
orf19.1032-T-E1	orf19.1032-T	orf19.1032-T		8	38	23	287	1	2	140	8	1	0	0	0	19	0	0	0	0	0	0	0	38	147
orf19.1033-T-E1	orf19.1033-T	orf19.1033-T		0	18	7	302	0	0	133	0	0	0	0	0	7	0	0	0	0	0	0	0	18	169
orf19.1034-T-E1	orf19.1034-T	orf19.1034-T		0	7	5	304	0	0	160	0	0	0	0	0	5	0	0	0	0	0	0	0	7	144
orf19.1035-T-E1	orf19.1035-T	orf19.1035-T		0	37	17	285	0	0	162	0	0	0	0	0	17	0	0	0	0	0	0	0	37	123
orf19.1036-T-E1	orf19.1036-T	orf19.1036-T		1	10	4	289	0	0	161	0	0	0	0	0	4	0	0	0	0	1	0	0	10	128
orf19.1037-T-E1	orf19.1037-T	orf19.1037-T		1	34	30	214	0	1	97	1	0	1	0	0	28	0	0	0	0	0	0	0	34	117
orf19.1039-T-E2	orf19.1039-T	orf19.1039-T		0	5	11	375	0	0	222	0	0	3	0	2	8	0	0	0	0	0	0	0	5	151
orf19.104-T-E1	orf19.104-T	orf19.104-T		52	81	81	1662	2	2	793	46	0	0	0	0	77	0	0	0	1	5	0	0	81	869
orf19.1040-T-E1	orf19.1040-T	orf19.1040-T		0	4	6	345	2	1	151	0	0	0	0	0	3	0	0	0	0	0	0	0	4	194
orf19.1041-T-E1	orf19.1041-T	orf19.1041-T		5	4	23	378	3	0	188	5	6	2	0	0	12	0	0	0	0	0	0	0	4	190
orf19.1042-T-E1	orf19.1042-T	orf19.1042-T		0	7	0	353	0	0	170	0	0	0	0	0	0	0	0	0	0	0	0	0	7	183
orf19.1043-T-E1	orf19.1043-T	orf19.1043-T		6	4	16	352	3	1	201	6	2	0	0	0	10	0	0	0	0	0	0	0	4	151
orf19.1045-T-E1	orf19.1045-T	orf19.1045-T		11	9	25	381	6	2	161	11	5	3	0	0	9	0	0	0	0	0	0	0	9	220
orf19.1047-T-E1	orf19.1047-T	orf19.1047-T		2	16	34	462	8	1	271	2	2	5	0	0	18	0	0	0	0	0	0	0	16	191
orf19.1048-T-E1	orf19.1048-T	orf19.1048-T		10	71	31	321	0	2	147	9	0	0	0	0	29	0	0	1	0	0	1	0	71	174
orf19.1049-T-E1	orf19.1049-T	orf19.1049-T		0	1	3	393	0	0	241	0	0	2	0	0	1	0	0	0	0	0	0	0	1	152
orf19.105-T-E1	orf19.105-T	orf19.105-T		11	238	67	1528	2	3	549	11	0	1	0	0	61	0	0	2	0	0	1	1	237	979
orf19.1050-T-E1	orf19.1050-T	orf19.1050-T		0	2	16	371	0	0	228	0	1	2	0	0	13	0	0	0	0	0	0	0	2	143
orf19.1051-T-E1	orf19.1051-T	orf19.1051-T		0	1	0	427	0	0	246	0	0	0	0	0	0	0	0	0	0	0	0	0	1	181
orf19.1052-T-E1	orf19.1052-T	orf19.1052-T		0	3	0	415	0	0	150	0	0	0	0	0	0	0	0	0	0	0	0	0	3	265
orf19.1053-T-E1	orf19.1053-T	orf19.1053-T		0	6	6	407	0	0	222	0	0	0	0	0	6	0	0	0	0	0	0	0	6	185
orf19.1054-T-E1	orf19.1054-T	orf19.1054-T		0	7	8	316	0	1	149	0	0	0	0	0	7	0	0	0	0	0	0	0	7	167
orf19.1055-T-E2	orf19.1055-T	orf19.1055-T		0	9	1	318	0	0	182	0	0	0	0	3	1	0	0	0	0	0	0	0	9	133
orf19.1057-T-E1	orf19.1057-T	orf19.1057-T		1	4	5	284	0	0	182	0	0	3	0	0	3	0	0	0	0	1	0	0	4	102
orf19.1058-T-E1	orf19.1058-T	orf19.1058-T		0	5	4	270	0	0	97	0	0	0	0	8	4	0	0	2	0	0	0	0	3	167
orf19.1059-T-E1	orf19.1059-T	orf19.1059-T		0	2	1	244	0	0	131	0	0	0	0	0	1	0	0	0	0	0	0	0	2	113
orf19.1060-T-E1	orf19.1060-T	orf19.1060-T		7	0	4	224	1	0	112	5	1	0	0	0	2	0	0	0	0	2	0	0	0	112
orf19.1061-T-E1	orf19.1061-T	orf19.1061-T		0	3	0	234	0	0	108	0	0	0	0	0	0	0	0	0	0	0	0	0	3	126
orf19.1062-T-E1	orf19.1062-T	orf19.1062-T		0	10	4	255	0	0	132	0	0	0	0	0	4	0	0	0	0	0	0	0	10	123
orf19.1063-T-E1	orf19.1063-T	orf19.1063-T		0	6	7	266	0	0	104	0	0	0	0	0	7	0	0	0	0	0	0	0	6	162
orf19.1064-T-E2	orf19.1064-T	orf19.1064-T		0	27	4	316	0	0	115	0	0	0	0	36	4	0	0	0	0	0	0	0	27	165
orf19.1065-T-E1	orf19.1065-T	orf19.1065-T		0	27	3	358	0	0	163	0	0	0	0	0	3	0	0	0	0	0	0	0	27	195
orf19.1066-T-E1	orf19.1066-T	orf19.1066-T		0	19	7	338	0	0	158	0	0	0	0	0	7	0	0	0	0	0	0	0	19	180
orf19.1067-T-E1	orf19.1067-T	orf19.1067-T		0	9	2	331	0	0	145	0	0	0	0	0	2	0	0	0	0	0	0	0	9	186
orf19.1069-T-E1	orf19.1069-T	orf19.1069-T		0	23	12	369	0	2	176	0	0	0	0	0	10	0	0	0	0	0	0	0	23	193
orf19.107-T-E1	orf19.107-T	orf19.107-T		5	203	63	1657	0	1	1152	5	0	1	0	0	61	0	0	0	0	0	0	0	203	505
orf19.1070-T-E1	orf19.1070-T	orf19.1070-T		0	16	5	334	0	0	144	0	0	1	0	0	4	0	0	0	0	0	0	0	16	190
orf19.1075-T-E1	orf19.1075-T	orf19.1075-T		10	6	40	316	11	0	143	10	5	6	0	0	18	0	0	0	0	0	0	0	6	173
orf19.1075.1-T-E1	orf19.1075.1-T	orf19.1075.1-T		0	1	2	326	0	0	201	0	0	0	0	0	2	0	0	1	0	0	0	1	0	125
orf19.1077-T-E1	orf19.1077-T	orf19.1077-T		0	9	22	384	2	0	236	0	5	2	0	0	13	0	0	0	0	0	0	0	9	148
orf19.1078-T-E1	orf19.1078-T	orf19.1078-T		1	10	7	320	0	0	151	1	0	0	0	0	7	0	0	1	0	0	0	1	9	169
orf19.1080-T-E1	orf19.1080-T	orf19.1080-T		1	14	25	270	5	1	137	0	3	3	0	0	13	0	0	0	0	1	0	0	14	133
orf19.1082-T-E1	orf19.1082-T	orf19.1082-T		0	8	5	269	0	0	118	0	0	0	0	0	5	0	0	0	0	0	0	0	8	151
orf19.1082.1-T-E1	orf19.1082.1-T	orf19.1082.1-T		0	2	0	277	0	0	107	0	0	0	0	0	0	0	0	0	0	0	0	0	2	170
orf19.1083-T-E1	orf19.1083-T	orf19.1083-T		0	6	6	273	0	0	164	0	0	0	0	0	6	0	0	0	0	0	0	0	6	109
orf19.1084-T-E1	orf19.1084-T	orf19.1084-T		1	60	53	332	11	10	203	1	3	1	0	0	28	0	0	0	0	0	0	0	60	129
orf19.1085-T-E1	orf19.1085-T	orf19.1085-T		0	3	2	310	0	0	195	0	1	0	0	0	1	0	0	0	0	0	0	0	3	115
orf19.1086-T-E1	orf19.1086-T	orf19.1086-T		3	20	44	318	4	4	179	3	2	1	0	0	33	0	0	0	0	0	0	0	20	139
orf19.1087-T-E1	orf19.1087-T	orf19.1087-T		7	9	45	370	6	8	177	7	1	6	0	0	24	0	0	0	0	0	0	0	9	193
orf19.1089-T-E1	orf19.1089-T	orf19.1089-T		0	2	8	343	0	0	152	0	2	1	0	0	5	0	0	0	0	0	0	0	2	191
orf19.109-T-E1	orf19.109-T	orf19.109-T		6	99	24	1395	0	0	504	6	0	0	0	0	24	0	0	0	0	0	0	0	99	891
orf19.1090-T-E1	orf19.1090-T	orf19.1090-T		2	2	9	320	1	1	173	2	1	0	0	0	6	0	0	0	0	0	0	0	2	147
orf19.1091-T-E1	orf19.1091-T	orf19.1091-T		4	12	39	306	5	4	128	4	6	8	0	0	16	0	0	0	0	0	0	0	12	178
orf19.1092-T-E1	orf19.1092-T	orf19.1092-T		3	14	18	310	1	3	138	3	1	4	0	0	9	0	0	0	0	0	0	0	14	172
orf19.1093-T-E1	orf19.1093-T	orf19.1093-T		8	20	15	280	5	2	151	5	0	0	0	0	8	0	0	0	0	3	0	0	20	129
orf19.1095-T-E1	orf19.1095-T	orf19.1095-T		0	4	3	299	0	0	133	0	0	0	0	0	3	0	0	0	0	0	0	0	4	166
orf19.1096-T-E1	orf19.1096-T	orf19.1096-T		2	23	19	326	1	0	185	2	1	0	0	0	17	0	0	0	0	0	0	0	23	141
orf19.1097-T-E1	orf19.1097-T	orf19.1097-T		13	145	77	429	4	6	278	10	2	1	0	0	64	0	0	0	0	3	0	0	145	151
orf19.11-T-E1	orf19.11-T	orf19.11-T		4	12	22	277	1	0	118	4	0	0	0	0	21	0	0	0	0	0	0	0	12	159
orf19.1105-T-E1	orf19.1105-T	orf19.1105-T		0	3	8	418	1	0	248	0	1	2	0	0	4	0	0	1	0	0	0	1	2	170
orf19.1105.2-T-E1	orf19.1105.2-T	orf19.1105.2-T		0	2	0	400	0	0	152	0	0	0	0	0	0	0	0	0	0	0	0	0	2	248
orf19.1105.3-T-E1	orf19.1105.3-T	orf19.1105.3-T		2	2	3	391	0	0	204	1	0	0	0	0	3	0	0	0	0	1	0	0	2	187
orf19.1106-T-E1	orf19.1106-T	orf19.1106-T		2	9	43	393	3	0	178	2	4	5	0	0	31	0	0	0	0	0	0	0	9	215
orf19.1107-T-E1	orf19.1107-T	orf19.1107-T		0	6	2	298	0	0	161	0	1	0	0	0	1	0	0	0	0	0	0	0	6	137
orf19.1108-T-E1	orf19.1108-T	orf19.1108-T		5	7	7	274	0	4	129	5	0	0	0	0	3	0	0	0	0	0	0	0	7	145
orf19.1109-T-E1	orf19.1109-T	orf19.1109-T		2	3	10	266	1	2	146	2	0	1	0	0	6	0	0	0	0	0	0	0	3	120
orf19.111-T-E1	orf19.111-T	orf19.111-T		3	160	13	1213	0	0	656	3	0	0	0	0	13	0	0	0	0	0	0	0	160	557
orf19.1110-T-E1	orf19.1110-T	orf19.1110-T		0	10	14	307	1	0	164	0	1	2	0	0	10	0	0	0	0	0	0	0	10	143
orf19.1111-T-E1	orf19.1111-T	orf19.1111-T		0	5	16	307	3	4	136	0	5	0	0	0	4	0	0	0	0	0	0	0	5	171
orf19.1112-T-E1	orf19.1112-T	orf19.1112-T		0	23	8	401	1	0	230	0	0	0	0	0	7	0	0	0	0	0	0	0	23	171
orf19.1113-T-E1	orf19.1113-T	orf19.1113-T		0	15	26	333	1	0	217	0	0	0	0	0	25	0	0	0	0	0	0	0	15	116
orf19.1114-T-E1	orf19.1114-T	orf19.1114-T		1	7	1	397	0	0	143	0	0	0	0	9	1	0	0	3	0	1	0	0	4	248
orf19.1115-T-E1	orf19.1115-T	orf19.1115-T		0	9	3	382	0	0	136	0	0	0	0	0	3	0	0	0	0	0	0	0	9	246
orf19.1116-T-E1	orf19.1116-T	orf19.1116-T		0	8	13	388	0	0	199	0	0	0	0	0	13	0	0	0	0	0	0	0	8	189
orf19.1117-T-E1	orf19.1117-T	orf19.1117-T		0	24	12	407	0	0	170	0	0	0	0	0	12	0	0	0	0	0	0	0	24	237
orf19.1119-T-E1	orf19.1119-T	orf19.1119-T		0	49	20	444	0	0	196	0	0	0	0	0	20	0	0	0	0	0	0	0	49	248
orf19.1120-T-E1	orf19.1120-T	orf19.1120-T		0	6	7	392	1	0	166	0	0	0	0	0	6	0	0	0	0	0	0	0	6	226
orf19.1121-T-E1	orf19.1121-T	orf19.1121-T		0	13	12	397	0	0	188	0	0	1	0	0	11	0	0	0	0	0	0	0	13	209
orf19.1122-T-E1	orf19.1122-T	orf19.1122-T		0	18	13	402	0	0	214	0	0	0	0	0	13	0	0	0	0	0	0	0	18	188
orf19.1123-T-E1	orf19.1123-T	orf19.1123-T		4	6	13	380	1	0	164	4	0	0	0	0	12	0	0	0	0	0	0	0	6	216
orf19.1124-T-E1	orf19.1124-T	orf19.1124-T		0	4	5	396	0	0	170	0	0	0	0	0	5	0	0	1	0	0	0	1	3	226
orf19.1124.2-T-E1	orf19.1124.2-T	orf19.1124.2-T		1	21	6	368	0	0	137	1	0	0	0	0	6	0	0	1	0	0	0	0	21	231
orf19.113-T-E1	orf19.113-T	orf19.113-T		0	68	32	1063	0	0	460	0	0	0	0	0	32	0	0	0	0	0	0	0	68	603
orf19.1133-T-E1	orf19.1133-T	orf19.1133-T		2	17	29	251	3	0	91	2	2	0	0	0	24	0	0	0	0	0	0	0	17	160
orf19.1135-T-E1	orf19.1135-T	orf19.1135-T		0	42	24	330	0	0	156	0	0	0	0	0	24	0	0	0	0	0	0	0	42	174
orf19.1136-T-E1	orf19.1136-T	orf19.1136-T		0	8	0	331	0	0	165	0	0	0	0	0	0	0	0	1	0	0	0	1	7	166
orf19.1137-T-E1	orf19.1137-T	orf19.1137-T		0	19	0	318	0	0	166	0	0	0	0	0	0	0	0	0	0	0	0	0	19	152
orf19.1139-T-E1	orf19.1139-T	orf19.1139-T		2	29	32	333	2	1	161	2	3	5	0	0	21	0	0	0	0	0	0	0	29	172
orf19.114-T-E1	orf19.114-T	orf19.114-T		10	53	70	1026	1	2	522	8	3	3	0	0	61	0	0	1	2	0	0	1	52	504
orf19.1140-T-E1	orf19.1140-T	orf19.1140-T		1	9	5	295	0	0	158	0	0	0	0	0	5	0	0	0	0	1	0	0	9	137
orf19.1142-T-E1	orf19.1142-T	orf19.1142-T		0	33	6	281	0	0	134	0	0	0	0	0	6	0	0	0	0	0	0	0	33	147
orf19.1143-T-E1	orf19.1143-T	orf19.1143-T		1	30	13	268	0	0	141	0	0	0	0	0	13	0	0	1	0	1	0	1	29	127
orf19.1144-T-E1	orf19.1144-T	orf19.1144-T		6	26	34	318	4	0	165	6	0	3	0	0	27	0	0	0	0	0	0	0	26	153
orf19.1146-T-E1	orf19.1146-T	orf19.1146-T		1	5	3	275	0	0	127	1	0	0	0	0	3	0	0	0	0	0	0	0	5	148
orf19.1148-T-E1	orf19.1148-T	orf19.1148-T		0	7	8	271	0	0	124	0	0	0	0	0	8	0	0	0	0	0	0	0	7	147
orf19.1149-T-E1	orf19.1149-T	orf19.1149-T		0	12	8	297	0	0	143	0	0	0	0	0	8	0	0	0	0	0	0	0	12	154
orf19.115-T-E2	orf19.115-T	orf19.115-T		4	39	41	1006	2	1	576	4	1	0	0	29	37	0	0	5	0	0	0	0	34	406
orf19.1150-T-E1	orf19.1150-T	orf19.1150-T		0	13	17	252	1	0	132	0	1	1	0	0	14	0	0	0	0	0	0	0	13	120
orf19.1150.1-T-E1	orf19.1150.1-T	orf19.1150.1-T		0	4	0	227	0	0	91	0	0	0	0	0	0	0	0	0	0	0	0	0	4	136
orf19.1152-T-E1	orf19.1152-T	orf19.1152-T		0	9	2	244	0	0	137	0	0	0	0	0	2	0	0	0	0	0	0	0	9	107
orf19.1153-T-E1	orf19.1153-T	orf19.1153-T		0	10	5	254	0	0	144	0	0	0	0	0	5	0	0	0	0	0	0	0	10	110
orf19.1154-T-E1	orf19.1154-T	orf19.1154-T		0	5	0	245	0	0	109	0	0	0	0	0	0	0	0	0	0	0	0	0	5	136
orf19.1155-T-E1	orf19.1155-T	orf19.1155-T		0	9	5	237	0	0	134	0	0	0	0	0	5	0	0	0	0	0	0	0	9	103
orf19.1156-T-E1	orf19.1156-T	orf19.1156-T		0	10	9	222	0	0	125	0	0	0	0	0	9	0	0	0	0	0	0	0	10	97
orf19.1158-T-E1	orf19.1158-T	orf19.1158-T		5	14	19	204	0	0	108	5	0	0	0	0	19	0	0	0	0	0	0	0	14	96
orf19.1159-T-E1	orf19.1159-T	orf19.1159-T		0	23	12	208	0	0	79	0	0	0	0	0	12	0	0	0	0	0	0	0	23	129
orf19.1160-T-E1	orf19.1160-T	orf19.1160-T		0	10	3	201	0	0	131	0	0	0	0	0	3	0	0	0	0	0	0	0	10	70
orf19.1161-T-E1	orf19.1161-T	orf19.1161-T		0	51	15	256	0	0	140	0	0	0	0	0	15	0	0	0	0	0	0	0	51	116
orf19.1162-T-E1	orf19.1162-T	orf19.1162-T		0	4	2	199	0	0	74	0	0	0	0	0	2	0	0	0	0	0	0	0	4	125
orf19.1162.1-T-E1	orf19.1162.1-T	orf19.1162.1-T		1	6	2	203	0	0	77	0	0	0	0	2	2	0	0	0	0	1	0	0	6	124
orf19.1163-T-E1	orf19.1163-T	orf19.1163-T		0	13	9	211	0	0	128	0	0	0	0	0	9	0	0	0	0	0	0	0	13	83
orf19.1164-T-E1	orf19.1164-T	orf19.1164-T		0	7	9	240	0	4	95	0	0	2	0	0	3	0	0	0	0	0	0	0	7	145
orf19.1166-T-E2	orf19.1166-T	orf19.1166-T		0	52	39	277	1	0	165	0	0	0	0	1	38	0	0	1	0	0	0	0	51	112
orf19.1167-T-E1	orf19.1167-T	orf19.1167-T		0	14	4	301	0	0	156	0	0	0	0	0	4	0	0	0	0	0	0	0	14	145
orf19.1168-T-E1	orf19.1168-T	orf19.1168-T		0	7	5	290	0	0	155	0	0	0	0	0	5	0	0	0	0	0	0	0	7	135
orf19.1169-T-E1	orf19.1169-T	orf19.1169-T		0	8	7	278	0	0	127	0	0	0	0	0	7	0	0	0	0	0	0	0	8	151
orf19.117-T-E1	orf19.117-T	orf19.117-T		0	57	26	967	1	5	327	0	0	2	0	0	18	0	0	0	0	0	0	0	57	640
orf19.1170-T-E1	orf19.1170-T	orf19.1170-T		0	12	4	300	0	0	136	0	0	0	0	0	4	0	0	0	0	0	0	0	12	164
orf19.1171-T-E1	orf19.1171-T	orf19.1171-T		0	23	1	348	0	0	182	0	0	0	0	0	1	0	0	0	0	0	0	0	23	166
orf19.1177-T-E1	orf19.1177-T	orf19.1177-T		4	34	3	328	0	0	172	4	1	0	0	0	2	0	0	0	0	0	0	0	34	156
orf19.1178-T-E1	orf19.1178-T	orf19.1178-T		0	11	9	329	0	0	164	0	0	0	0	0	9	0	0	0	0	0	0	0	11	165
orf19.1179-T-E1	orf19.1179-T	orf19.1179-T		0	2	2	332	0	0	158	0	0	0	0	0	2	0	0	0	0	0	0	0	2	174
orf19.118-T-E1	orf19.118-T	orf19.118-T		0	23	2	705	0	0	225	0	0	0	0	0	2	0	0	0	0	0	0	0	23	480
orf19.1180-T-E1	orf19.1180-T	orf19.1180-T		0	30	16	299	0	0	138	0	0	0	0	0	16	0	0	0	0	0	0	0	30	161
orf19.1181-T-E1	orf19.1181-T	orf19.1181-T		4	17	13	300	0	0	134	3	0	0	0	0	13	0	0	0	0	1	0	0	17	166
orf19.1182-T-E1	orf19.1182-T	orf19.1182-T		0	22	8	290	1	0	168	0	0	0	0	0	7	0	0	0	0	0	0	0	22	122
orf19.1183-T-E1	orf19.1183-T	orf19.1183-T		0	31	8	293	0	0	121	0	0	0	0	0	8	0	0	0	0	0	0	0	31	172
orf19.1185-T-E1	orf19.1185-T	orf19.1185-T		0	14	5	274	0	1	122	0	0	0	0	0	4	0	0	0	0	0	0	0	14	152
orf19.1186-T-E1	orf19.1186-T	orf19.1186-T		0	11	8	266	0	0	131	0	0	0	0	0	8	0	0	0	0	0	0	0	11	135
orf19.1187-T-E1	orf19.1187-T	orf19.1187-T		0	36	18	263	0	0	148	0	0	0	0	0	18	0	0	0	0	0	0	0	36	115
orf19.1189-T-E1	orf19.1189-T	orf19.1189-T		5	36	39	297	1	1	145	4	0	1	0	0	36	0	0	0	0	1	0	0	36	152
orf19.119-T-E1	orf19.119-T	orf19.119-T		4	9	25	521	0	2	336	4	0	0	0	0	23	0	0	0	0	0	0	0	9	185
orf19.1190-T-E1	orf19.1190-T	orf19.1190-T		0	39	17	269	0	0	189	0	0	0	0	0	17	0	0	0	0	0	0	0	39	80
orf19.1191-T-E1	orf19.1191-T	orf19.1191-T		0	24	8	240	0	0	98	0	0	0	0	0	8	0	0	0	0	0	0	0	24	142
orf19.1192-T-E1	orf19.1192-T	orf19.1192-T		0	44	27	193	0	0	96	0	0	0	0	0	27	0	0	0	0	0	0	0	44	97
orf19.1193-T-E1	orf19.1193-T	orf19.1193-T		0	14	2	215	0	0	99	0	0	0	0	0	2	0	0	0	0	0	0	0	14	116
orf19.1195-T-E1	orf19.1195-T	orf19.1195-T		1	24	15	216	0	0	103	0	0	0	0	0	15	0	0	0	0	1	0	0	24	113
orf19.1196-T-E1	orf19.1196-T	orf19.1196-T		1	23	17	207	1	0	92	1	0	0	0	0	16	0	0	0	0	0	0	0	23	115
orf19.1198-T-E1	orf19.1198-T	orf19.1198-T		0	6	2	197	0	0	113	0	0	0	0	0	2	0	0	0	0	0	0	0	6	84
orf19.1199-T-E1	orf19.1199-T	orf19.1199-T		0	22	5	195	1	0	114	0	0	0	0	0	4	0	0	0	0	0	0	0	22	81
orf19.120-T-E1	orf19.120-T	orf19.120-T		0	11	25	487	1	0	171	0	1	4	0	0	19	0	0	1	0	0	0	1	10	316
orf19.1200-T-E1	orf19.1200-T	orf19.1200-T		0	7	1	186	0	0	102	0	0	0	0	0	1	0	0	0	0	0	0	0	7	84
orf19.1201-T-E1	orf19.1201-T	orf19.1201-T		0	9	12	176	0	0	81	0	0	0	0	0	12	0	0	0	0	0	0	0	9	95
orf19.1202-T-E1	orf19.1202-T	orf19.1202-T		0	7	16	150	0	0	85	0	0	0	0	0	16	0	0	0	0	0	0	0	7	65
orf19.1203-T-E1	orf19.1203-T	orf19.1203-T		1	27	13	171	0	0	84	1	0	0	0	0	13	0	0	0	0	0	0	0	27	87
orf19.1203.1-T-E1	orf19.1203.1-T	orf19.1203.1-T		0	1	1	167	0	0	89	0	0	0	0	1	1	0	0	0	0	0	0	0	1	77
orf19.1204-T-E1	orf19.1204-T	orf19.1204-T		0	11	5	181	0	0	73	0	0	0	0	0	5	0	0	0	0	0	0	0	11	108
orf19.1207-T-E1	orf19.1207-T	orf19.1207-T		1	6	7	638	0	0	424	0	0	0	0	0	7	0	0	1	0	0	1	0	6	214
orf19.1208-T-E1	orf19.1208-T	orf19.1208-T		4	38	53	567	0	0	351	3	0	0	0	0	53	0	0	0	0	1	0	0	38	216
orf19.121-T-E1	orf19.121-T	orf19.121-T		0	4	2	445	0	0	256	0	0	0	0	0	2	0	0	0	0	0	0	0	4	189
orf19.1210-T-E1	orf19.1210-T	orf19.1210-T		4	6	12	331	2	0	139	4	1	0	0	0	9	0	0	0	0	2	0	0	6	192
orf19.1212-T-E1	orf19.1212-T	orf19.1212-T		6	9	18	313	4	7	119	6	2	2	0	13	3	0	0	0	0	0	0	0	9	181
orf19.1214-T-E1	orf19.1214-T	orf19.1214-T		2	11	18	373	2	0	192	2	1	0	0	0	15	0	0	0	0	0	0	0	11	181
orf19.1215-T-E1	orf19.1215-T	orf19.1215-T		2	12	27	372	3	0	182	2	0	4	0	0	20	0	0	0	0	0	0	0	12	190
orf19.1217-T-E1	orf19.1217-T	orf19.1217-T		1	50	46	298	0	0	168	1	0	0	0	0	46	0	0	0	0	0	0	0	50	130
orf19.1219-T-E1	orf19.1219-T	orf19.1219-T		3	22	11	403	0	0	195	3	0	0	0	0	11	0	0	0	0	0	0	0	22	208
orf19.122-T-E1	orf19.122-T	orf19.122-T		0	27	9	384	0	0	163	0	0	0	0	0	9	0	0	0	0	0	0	0	27	221
orf19.1220-T-E1	orf19.1220-T	orf19.1220-T		0	12	7	621	0	0	437	0	0	0	0	0	7	0	0	0	0	0	0	0	12	184
orf19.1221-T-E1	orf19.1221-T	orf19.1221-T		2	20	6	798	0	0	160	2	1	0	0	0	5	0	0	0	0	0	0	0	20	638
orf19.1223-T-E1	orf19.1223-T	orf19.1223-T		2	14	16	414	2	1	150	2	5	1	0	0	7	0	0	0	0	0	0	0	14	264
orf19.1224-T-E1	orf19.1224-T	orf19.1224-T		4	4	4	494	1	0	237	4	0	0	0	0	3	0	0	0	0	0	0	0	4	257
orf19.1225-T-E1	orf19.1225-T	orf19.1225-T		0	5	6	435	0	1	236	0	0	0	0	0	5	0	0	1	0	0	0	1	4	199
orf19.1227-T-E1	orf19.1227-T	orf19.1227-T		0	2	15	350	2	4	196	0	0	0	0	0	9	0	0	1	0	0	0	1	1	154
orf19.1228-T-E1	orf19.1228-T	orf19.1228-T		2	5	47	362	8	7	190	2	2	5	0	0	25	0	0	0	0	0	0	0	5	172
orf19.1229-T-E1	orf19.1229-T	orf19.1229-T		10	19	38	427	6	1	217	10	2	3	0	0	26	0	0	0	0	0	0	0	19	210
orf19.123-T-E1	orf19.123-T	orf19.123-T		0	10	11	353	3	0	172	0	2	0	0	0	6	0	0	0	0	0	0	0	10	181
orf19.1232-T-E1	orf19.1232-T	orf19.1232-T		5	3	6	386	0	1	192	4	1	2	0	0	3	0	0	0	0	2	0	0	3	194
orf19.1233-T-E1	orf19.1233-T	orf19.1233-T		4	3	8	674	2	0	204	4	0	0	0	0	6	0	0	1	0	0	0	1	2	470
orf19.1234-T-E1	orf19.1234-T	orf19.1234-T		10	43	83	792	0	0	379	7	0	0	0	0	83	0	0	0	0	3	0	0	43	413
orf19.1235-T-E1	orf19.1235-T	orf19.1235-T		0	20	5	624	0	0	172	0	0	1	0	0	4	0	0	0	0	0	0	0	20	452
orf19.1236-T-E1	orf19.1236-T	orf19.1236-T		0	15	1	480	0	0	285	0	0	0	0	0	1	0	0	0	0	0	0	0	15	195
orf19.1237-T-E1	orf19.1237-T	orf19.1237-T		0	26	11	376	0	0	220	0	0	0	0	0	11	0	0	0	0	0	0	0	26	156
orf19.1238-T-E2	orf19.1238-T	orf19.1238-T		0	32	10	329	0	0	151	0	0	3	0	5	7	0	0	0	0	0	0	0	32	173
orf19.1239-T-E1	orf19.1239-T	orf19.1239-T		0	10	3	363	0	0	193	0	0	0	0	0	3	0	0	0	0	0	0	0	10	170
orf19.124-T-E1	orf19.124-T	orf19.124-T		0	10	17	334	0	0	160	0	0	2	0	0	15	0	0	0	0	0	0	0	10	174
orf19.1240-T-E1	orf19.1240-T	orf19.1240-T		1	107	59	266	0	0	94	1	0	0	0	0	59	0	0	0	0	0	0	0	107	172
orf19.1244-T-E1	orf19.1244-T	orf19.1244-T		1	26	8	233	0	0	119	1	0	0	0	0	8	0	0	0	0	0	0	0	26	114
orf19.1246-T-E1	orf19.1246-T	orf19.1246-T		5	19	38	194	2	0	87	5	0	2	0	0	34	0	0	0	0	0	0	0	19	107
orf19.1247-T-E1	orf19.1247-T	orf19.1247-T		1	7	5	188	1	0	96	0	0	0	0	0	4	0	0	0	0	1	0	0	7	92
orf19.1248-T-E1	orf19.1248-T	orf19.1248-T		0	1	1	230	0	0	106	0	0	0	0	0	1	0	0	0	0	0	0	0	1	124
orf19.1249-T-E1	orf19.1249-T	orf19.1249-T		0	4	8	248	0	0	111	0	0	0	0	0	8	0	0	0	0	0	0	0	4	137
orf19.125-T-E1	orf19.125-T	orf19.125-T		2	9	8	313	0	0	162	2	0	0	0	0	8	0	0	0	0	0	0	0	9	151
orf19.1250-T-E1	orf19.1250-T	orf19.1250-T		0	10	7	254	0	0	146	0	0	0	0	0	7	0	0	0	0	0	0	0	10	108
orf19.1251-T-E1	orf19.1251-T	orf19.1251-T		0	25	20	249	1	0	98	0	2	0	0	0	17	0	0	0	0	0	0	0	25	151
orf19.1252-T-E1	orf19.1252-T	orf19.1252-T		0	19	11	268	0	0	128	0	0	0	0	0	11	0	0	0	0	0	0	0	19	140
orf19.1253-T-E1	orf19.1253-T	orf19.1253-T		0	25	19	278	2	2	145	0	0	0	0	0	15	0	0	0	0	0	0	0	25	133
orf19.1254-T-E1	orf19.1254-T	orf19.1254-T		0	36	8	257	1	0	128	0	1	0	0	0	6	0	0	0	0	0	0	0	36	129
orf19.1255-T-E1	orf19.1255-T	orf19.1255-T		1	22	13	355	2	0	206	0	0	0	0	0	11	0	0	0	0	1	0	0	22	149
orf19.1257-T-E1	orf19.1257-T	orf19.1257-T		2	5	6	269	0	0	111	0	0	0	0	0	6	0	0	0	0	2	0	0	5	158
orf19.1258-T-E1	orf19.1258-T	orf19.1258-T		0	6	15	278	0	0	80	0	0	0	0	0	15	0	0	0	0	0	0	0	6	198
orf19.1259-T-E1	orf19.1259-T	orf19.1259-T		2	30	23	318	0	0	205	2	0	0	0	0	23	0	0	0	0	0	0	0	30	113
orf19.1260-T-E1	orf19.1260-T	orf19.1260-T		0	1	6	195	0	0	73	0	0	0	0	0	6	0	0	0	0	0	0	0	1	122
orf19.1261-T-E1	orf19.1261-T	orf19.1261-T		0	16	7	204	1	2	130	0	0	0	0	0	4	0	0	0	0	0	0	0	16	74
orf19.1263-T-E1	orf19.1263-T	orf19.1263-T		5	33	17	184	1	0	84	4	0	1	0	0	15	0	0	0	0	1	0	0	33	100
orf19.1264-T-E1	orf19.1264-T	orf19.1264-T		0	14	13	256	0	0	130	0	0	0	0	0	13	0	0	0	0	0	0	0	14	126
orf19.1265-T-E1	orf19.1265-T	orf19.1265-T		0	20	33	304	0	0	182	0	0	0	0	0	33	0	0	0	0	0	0	0	20	122
orf19.1266-T-E1	orf19.1266-T	orf19.1266-T		3	3	17	232	0	0	120	2	0	0	0	0	17	0	0	1	0	0	1	0	3	112
orf19.1267-T-E1	orf19.1267-T	orf19.1267-T		1	15	8	240	0	0	84	1	0	0	0	0	8	0	0	0	0	0	0	0	15	156
orf19.1267.1-T-E1	orf19.1267.1-T	orf19.1267.1-T		0	3	2	287	0	0	113	0	0	0	0	0	2	0	0	0	0	0	0	0	3	174
orf19.1268-T-E1	orf19.1268-T	orf19.1268-T		3	2	8	300	0	0	123	3	0	0	0	0	8	0	0	0	0	0	0	0	2	177
orf19.1270-T-E1	orf19.1270-T	orf19.1270-T		0	16	10	314	0	0	130	0	0	0	0	0	10	0	0	0	0	0	0	0	16	184
orf19.1272-T-E1	orf19.1272-T	orf19.1272-T		0	6	13	229	0	0	91	0	0	0	0	0	13	0	0	0	0	0	0	0	6	138
orf19.1273-T-E1	orf19.1273-T	orf19.1273-T		0	4	5	225	0	0	100	0	0	0	0	0	5	0	0	0	0	0	0	0	4	125
orf19.1274-T-E1	orf19.1274-T	orf19.1274-T		1	14	3	248	0	0	136	0	0	0	0	0	3	0	0	0	0	1	0	0	14	112
orf19.1275-T-E1	orf19.1275-T	orf19.1275-T		0	20	18	255	0	0	154	0	0	0	0	0	18	0	0	0	0	0	0	0	20	101
orf19.1276-T-E1	orf19.1276-T	orf19.1276-T		0	2	3	268	0	0	146	0	0	0	0	0	3	0	0	0	0	0	0	0	2	122
orf19.1277-T-E1	orf19.1277-T	orf19.1277-T		0	6	19	269	1	6	119	0	0	2	0	0	10	0	0	0	0	0	0	0	6	150
orf19.1279-T-E1	orf19.1279-T	orf19.1279-T		0	17	10	323	0	0	141	0	0	0	0	0	10	0	0	0	0	0	0	0	17	182
orf19.1280-T-E1	orf19.1280-T	orf19.1280-T		0	1	0	351	0	0	170	0	0	0	0	0	0	0	0	0	0	0	0	0	1	181
orf19.1281-T-E1	orf19.1281-T	orf19.1281-T		0	6	12	336	0	0	175	0	0	0	0	0	12	0	0	0	0	0	0	0	6	161
orf19.1282-T-E1	orf19.1282-T	orf19.1282-T		0	3	0	351	0	0	182	0	0	0	0	0	0	0	0	0	0	0	0	0	3	169
orf19.1283-T-E1	orf19.1283-T	orf19.1283-T		0	142	51	467	0	0	281	0	0	0	0	0	51	0	0	0	0	0	0	0	142	186
orf19.1285-T-E1	orf19.1285-T	orf19.1285-T		0	70	32	420	1	0	136	0	0	0	0	0	31	0	0	0	0	0	0	0	70	284
orf19.1286-T-E1	orf19.1286-T	orf19.1286-T		6	1	6	455	0	0	168	6	0	0	0	0	6	0	0	0	0	0	0	0	1	287
orf19.1287-T-E1	orf19.1287-T	orf19.1287-T		0	8	13	408	0	1	190	0	1	1	0	0	10	0	0	0	0	0	0	0	8	218
orf19.1288-T-E1	orf19.1288-T	orf19.1288-T		2	18	6	251	1	0	113	2	0	0	0	0	5	0	0	0	0	0	0	0	18	138
orf19.1289-T-E1	orf19.1289-T	orf19.1289-T		0	31	5	247	0	0	129	0	0	0	0	0	5	0	0	0	0	0	0	0	31	118
orf19.1290-T-E1	orf19.1290-T	orf19.1290-T		0	11	11	264	0	0	127	0	0	0	0	0	11	0	0	0	0	0	0	0	11	137
orf19.1291-T-E1	orf19.1291-T	orf19.1291-T		4	14	23	277	2	9	134	4	0	0	0	0	12	0	0	0	0	0	0	0	14	143
orf19.1295-T-E1	orf19.1295-T	orf19.1295-T		0	28	17	331	3	0	181	0	3	1	0	0	10	0	0	1	0	0	0	1	27	150
orf19.1296-T-E1	orf19.1296-T	orf19.1296-T		3	11	32	261	6	6	112	3	1	7	0	0	12	0	0	0	0	0	0	0	11	149
orf19.1297-T-E1	orf19.1297-T	orf19.1297-T		2	29	24	329	0	5	166	2	0	2	0	0	17	0	0	0	0	0	0	0	29	163
orf19.1298-T-E1	orf19.1298-T	orf19.1298-T		0	25	37	364	6	0	164	0	3	3	0	0	25	0	0	0	0	0	0	0	25	200
orf19.1299-T-E1	orf19.1299-T	orf19.1299-T		0	14	10	383	3	3	173	0	0	0	0	0	4	0	0	0	0	0	0	0	14	210
orf19.130-T-E1	orf19.130-T	orf19.130-T		1	51	57	267	2	1	162	0	0	2	0	0	52	0	0	0	0	1	0	0	51	105
orf19.1300-T-E1	orf19.1300-T	orf19.1300-T		0	11	6	368	0	0	189	0	0	0	0	0	6	0	0	0	0	0	0	0	11	179
orf19.1301-T-E1	orf19.1301-T	orf19.1301-T		6	10	11	309	1	0	129	6	1	0	0	0	9	0	0	0	0	0	0	0	10	180
orf19.1302-T-E1	orf19.1302-T	orf19.1302-T		0	9	6	342	2	0	165	0	0	0	0	0	4	0	0	0	0	0	0	0	9	177
orf19.1303-T-E1	orf19.1303-T	orf19.1303-T		1	12	15	421	0	0	217	0	0	0	0	0	15	0	0	0	0	1	0	0	12	204
orf19.1304-T-E1	orf19.1304-T	orf19.1304-T		0	7	11	422	0	2	193	0	0	5	0	0	4	0	0	0	0	0	0	0	7	229
orf19.1305-T-E1	orf19.1305-T	orf19.1305-T		0	18	13	430	0	0	247	0	0	0	0	0	13	0	0	0	0	0	0	0	18	183
orf19.1306-T-E1	orf19.1306-T	orf19.1306-T		1	19	12	449	0	0	265	0	0	0	0	0	12	0	0	0	0	1	0	0	19	184
orf19.1307-T-E1	orf19.1307-T	orf19.1307-T		0	36	24	473	1	0	263	0	0	5	0	0	18	0	0	0	0	0	0	0	36	210
orf19.1308-T-E1	orf19.1308-T	orf19.1308-T		2	49	12	499	0	0	228	2	0	0	0	0	12	0	0	0	0	0	0	0	49	271
orf19.1309-T-E1	orf19.1309-T	orf19.1309-T		0	11	6	470	0	0	207	0	0	0	0	0	6	0	0	0	0	0	0	0	11	263
orf19.131-T-E1	orf19.131-T	orf19.131-T		0	8	7	237	0	0	110	0	0	0	0	0	7	0	0	0	0	0	0	0	8	127
orf19.131.2-T-E1	orf19.131.2-T	orf19.131.2-T		0	1	2	216	0	0	113	0	0	0	0	1	2	0	0	0	0	0	0	0	1	102
orf19.1310-T-E1	orf19.1310-T	orf19.1310-T		0	38	21	468	0	0	196	0	0	0	0	0	21	0	0	0	0	0	0	0	38	272
orf19.1311-T-E1	orf19.1311-T	orf19.1311-T		1	64	29	511	1	0	262	0	0	1	0	0	27	0	0	0	0	1	0	0	64	249
orf19.1313-T-E1	orf19.1313-T	orf19.1313-T		0	16	2	346	0	0	234	0	0	0	0	0	2	0	0	0	0	0	0	0	16	112
orf19.1314-T-E1	orf19.1314-T	orf19.1314-T		0	40	9	308	0	0	178	0	0	0	0	0	9	0	0	0	0	0	0	0	40	130
orf19.1317-T-E1	orf19.1317-T	orf19.1317-T		0	63	12	451	1	0	243	0	0	1	0	0	10	0	0	1	0	0	0	1	62	208
orf19.1318-T-E1	orf19.1318-T	orf19.1318-T		0	16	9	431	0	0	182	0	1	0	0	0	8	0	0	0	0	0	0	0	16	249
orf19.132-T-E1	orf19.132-T	orf19.132-T		3	14	16	217	2	0	106	3	3	0	0	0	11	0	0	0	0	0	0	0	14	111
orf19.1321-T-E1	orf19.1321-T	orf19.1321-T		9	36	27	379	2	6	206	9	4	1	0	0	14	0	0	0	0	0	0	0	36	173
orf19.1323-T-E1	orf19.1323-T	orf19.1323-T		0	30	24	413	4	2	245	0	0	0	0	0	18	0	0	0	0	0	0	0	30	168
orf19.1324-T-E1	orf19.1324-T	orf19.1324-T		3	52	31	344	0	0	192	2	0	0	0	0	31	0	0	0	0	1	0	0	52	152
orf19.1325-T-E1	orf19.1325-T	orf19.1325-T		0	21	16	325	0	0	169	0	0	0	0	0	16	0	0	0	0	0	0	0	21	156
orf19.1326-T-E1	orf19.1326-T	orf19.1326-T		1	16	21	331	0	0	155	1	0	0	0	0	21	0	0	0	0	0	0	0	16	176
orf19.1327-T-E1	orf19.1327-T	orf19.1327-T		0	21	35	375	3	6	206	0	2	3	0	0	21	0	0	0	0	0	0	0	21	169
orf19.133-T-E1	orf19.133-T	orf19.133-T		1	4	3	193	0	0	88	0	0	0	0	0	3	0	0	0	0	1	0	0	4	105
orf19.1330-T-E1	orf19.1330-T	orf19.1330-T		15	43	67	375	1	1	223	14	1	0	0	0	64	0	0	0	0	1	0	0	43	152
orf19.1331-T-E1	orf19.1331-T	orf19.1331-T		0	16	7	400	0	0	131	0	0	0	0	0	7	0	0	0	0	0	0	0	16	269
orf19.1332-T-E1	orf19.1332-T	orf19.1332-T		1	20	11	402	0	1	224	0	0	0	0	0	10	0	0	0	0	1	0	0	20	178
orf19.1333-T-E1	orf19.1333-T	orf19.1333-T		0	28	16	310	0	0	162	0	0	0	0	0	16	0	0	0	0	0	0	0	28	148
orf19.1334-T-E1	orf19.1334-T	orf19.1334-T		2	18	14	249	0	0	78	2	1	1	0	0	12	0	0	0	0	0	0	0	18	171
orf19.1335-T-E1	orf19.1335-T	orf19.1335-T		1	24	6	259	0	0	96	0	0	0	0	0	6	0	0	0	0	1	0	0	24	163
orf19.1336-T-E1	orf19.1336-T	orf19.1336-T		0	11	1	178	0	0	101	0	0	0	0	0	1	0	0	0	0	0	0	0	11	77
orf19.1336.2-T-E1	orf19.1336.2-T	orf19.1336.2-T		0	2	1	177	0	0	85	0	0	0	0	0	1	0	0	0	0	0	0	0	2	92
orf19.1338-T-E1	orf19.1338-T	orf19.1338-T		2	2	5	189	0	0	95	2	0	0	0	0	5	0	0	0	0	0	0	0	2	94
orf19.1339-T-E1	orf19.1339-T	orf19.1339-T		0	16	4	205	0	0	94	0	0	0	0	0	4	0	0	0	0	0	0	0	16	111
orf19.134-T-E1	orf19.134-T	orf19.134-T		2	0	6	183	0	0	88	2	1	0	0	0	5	0	0	0	0	0	0	0	0	95
orf19.1340-T-E1	orf19.1340-T	orf19.1340-T		1	3	5	191	0	0	96	0	0	0	0	0	5	0	0	0	0	1	0	0	3	95
orf19.1341-T-E1	orf19.1341-T	orf19.1341-T		0	8	9	168	0	0	86	0	0	0	0	0	9	0	0	0	0	0	0	0	8	82
orf19.1342-T-E1	orf19.1342-T	orf19.1342-T		0	21	4	183	0	0	88	0	0	0	0	0	4	0	0	0	0	0	0	0	21	95
orf19.1343-T-E1	orf19.1343-T	orf19.1343-T		0	21	18	290	1	0	181	0	0	1	0	0	16	0	0	0	0	0	0	0	21	109
orf19.1344-T-E1	orf19.1344-T	orf19.1344-T		0	4	4	272	0	0	75	0	0	0	0	0	4	0	0	0	0	0	0	0	4	197
orf19.1345-T-E1	orf19.1345-T	orf19.1345-T		0	43	29	333	0	0	207	0	0	0	0	0	29	0	0	0	0	0	0	0	43	126
orf19.1348-T-E1	orf19.1348-T	orf19.1348-T		3	4	15	357	1	0	210	3	0	0	0	0	14	0	0	0	0	0	0	0	4	147
orf19.1349-T-E1	orf19.1349-T	orf19.1349-T		0	9	12	346	0	7	209	0	0	0	0	0	5	0	0	0	0	0	0	0	9	137
orf19.135-T-E1	orf19.135-T	orf19.135-T		0	19	6	247	0	1	143	0	0	0	0	0	5	0	0	1	0	0	0	1	18	104
orf19.1350-T-E1	orf19.1350-T	orf19.1350-T		0	13	11	384	0	0	129	0	0	0	0	0	11	0	0	0	0	0	0	0	13	255
orf19.1351-T-E1	orf19.1351-T	orf19.1351-T		10	10	19	440	0	0	228	10	1	0	0	0	18	0	0	0	0	0	0	0	10	212
orf19.1352-T-E1	orf19.1352-T	orf19.1352-T		0	11	2	443	0	0	222	0	0	0	0	0	2	0	0	0	0	0	0	0	11	221
orf19.1353-T-E1	orf19.1353-T	orf19.1353-T		10	4	16	442	0	2	200	10	1	0	0	0	13	0	0	1	0	0	0	1	3	242
orf19.1354-T-E1	orf19.1354-T	orf19.1354-T		0	10	2	467	0	0	213	0	0	0	0	0	2	0	0	0	0	0	0	0	10	254
orf19.1355-T-E1	orf19.1355-T	orf19.1355-T		0	6	2	342	0	0	172	0	0	0	0	0	2	0	0	0	0	0	0	0	6	170
orf19.1356-T-E1	orf19.1356-T	orf19.1356-T		1	6	12	375	2	0	192	1	0	0	0	0	10	0	0	0	0	0	0	0	6	183
orf19.1357-T-E1	orf19.1357-T	orf19.1357-T		0	10	4	408	0	0	188	0	0	0	0	0	4	0	0	0	0	0	0	0	10	220
orf19.1358-T-E1	orf19.1358-T	orf19.1358-T		0	10	13	371	6	0	183	0	0	0	0	0	7	0	0	0	0	0	0	0	10	188
orf19.1359-T-E1	orf19.1359-T	orf19.1359-T		5	18	25	383	1	2	220	5	1	1	0	0	20	0	0	0	0	0	0	0	18	163
orf19.136-T-E1	orf19.136-T	orf19.136-T		2	30	17	226	3	4	87	2	0	0	0	0	10	0	0	0	0	0	0	0	30	139
orf19.1360-T-E1	orf19.1360-T	orf19.1360-T		0	4	8	354	0	1	190	0	0	1	0	0	6	0	0	0	0	0	0	0	4	164
orf19.1360.1-T-E1	orf19.1360.1-T	orf19.1360.1-T		0	2	4	340	0	0	157	0	0	0	0	0	4	0	0	0	0	0	0	0	2	183
orf19.1361-T-E1	orf19.1361-T	orf19.1361-T		0	5	5	354	0	0	166	0	0	0	0	0	5	0	0	0	0	0	0	0	5	188
orf19.1362-T-E1	orf19.1362-T	orf19.1362-T		0	16	10	315	0	1	161	0	0	0	0	0	9	0	0	0	0	0	0	0	16	154
orf19.1363-T-E1	orf19.1363-T	orf19.1363-T		0	14	8	355	0	0	193	0	0	0	0	0	8	0	0	0	0	0	0	0	14	162
orf19.1364-T-E1	orf19.1364-T	orf19.1364-T		0	7	7	375	0	0	160	0	1	0	0	0	6	0	0	0	0	0	0	0	7	215
orf19.1365-T-E1	orf19.1365-T	orf19.1365-T		2	31	10	352	0	0	168	1	0	0	0	0	10	0	0	0	0	1	0	0	31	184
orf19.1366-T-E1	orf19.1366-T	orf19.1366-T		0	16	12	351	0	0	160	0	0	0	0	0	12	0	0	0	0	0	0	0	16	191
orf19.1367-T-E1	orf19.1367-T	orf19.1367-T		0	6	17	374	4	4	210	0	0	1	0	0	8	0	0	0	0	0	0	0	6	164
orf19.1367.1-T-E1	orf19.1367.1-T	orf19.1367.1-T		0	2	1	344	0	0	165	0	0	0	0	0	1	0	0	0	0	0	0	0	2	179
orf19.1368-T-E1	orf19.1368-T	orf19.1368-T		2	21	24	361	5	2	176	2	0	0	0	0	17	0	0	0	0	0	0	0	21	185
orf19.1369-T-E1	orf19.1369-T	orf19.1369-T		1	32	15	395	0	0	207	1	0	0	0	0	15	0	0	0	0	0	0	0	32	188
orf19.137-T-E1	orf19.137-T	orf19.137-T		0	10	17	226	0	0	98	0	0	0	0	0	17	0	0	0	0	0	0	0	10	128
orf19.1370-T-E1	orf19.1370-T	orf19.1370-T		0	12	4	366	0	0	159	0	0	0	0	0	4	0	0	0	0	0	0	0	12	207
orf19.1371-T-E1	orf19.1371-T	orf19.1371-T		2	35	14	331	0	0	197	2	0	0	0	0	14	0	0	0	1	0	0	0	35	134
orf19.1372-T-E1	orf19.1372-T	orf19.1372-T		0	15	7	305	0	0	91	0	0	0	0	0	7	0	0	0	0	0	0	0	15	214
orf19.1373-T-E1	orf19.1373-T	orf19.1373-T		0	39	10	301	0	0	111	0	0	0	0	0	10	0	0	0	0	0	0	0	39	190
orf19.1374-T-E1	orf19.1374-T	orf19.1374-T		0	4	8	250	0	1	139	0	0	2	0	0	5	0	0	0	0	0	0	0	4	111
orf19.1375-T-E1	orf19.1375-T	orf19.1375-T		1	19	5	244	0	0	105	0	0	0	0	0	5	0	0	0	0	1	0	0	19	139
orf19.1376-T-E1	orf19.1376-T	orf19.1376-T		0	15	1	249	0	0	112	0	0	0	0	0	1	0	0	0	0	0	0	0	15	137
orf19.1377-T-E1	orf19.1377-T	orf19.1377-T		0	28	10	239	0	0	119	0	0	0	0	0	10	0	0	0	0	0	0	0	28	120
orf19.1378-T-E1	orf19.1378-T	orf19.1378-T		4	23	21	296	0	2	144	4	1	4	0	0	14	0	0	0	0	0	0	0	23	152
orf19.138-T-E1	orf19.138-T	orf19.138-T		1	13	11	221	3	0	79	0	0	0	0	0	8	0	0	0	0	1	0	0	13	142
orf19.1381-T-E1	orf19.1381-T	orf19.1381-T		4	13	16	288	0	0	154	4	0	1	0	0	15	0	0	0	0	1	0	0	13	134
orf19.1382-T-E1	orf19.1382-T	orf19.1382-T		0	20	7	285	0	0	130	0	0	0	0	0	7	0	0	0	0	0	0	0	20	155
orf19.1383-T-E1	orf19.1383-T	orf19.1383-T		1	44	29	289	0	0	160	0	0	0	0	0	29	0	0	0	0	1	0	0	44	129
orf19.1386-T-E1	orf19.1386-T	orf19.1386-T		0	1	4	321	0	0	162	0	0	0	0	0	4	0	0	0	0	0	0	0	1	159
orf19.1387-T-E1	orf19.1387-T	orf19.1387-T		0	20	7	344	0	0	202	0	0	0	0	0	7	0	0	0	0	0	0	0	20	142
orf19.1388-T-E1	orf19.1388-T	orf19.1388-T		0	7	5	356	0	0	161	0	0	0	0	0	5	0	0	0	0	0	0	0	7	195
orf19.1389-T-E1	orf19.1389-T	orf19.1389-T		0	5	3	325	0	0	158	0	0	0	0	0	3	0	0	0	0	0	0	0	5	167
orf19.139-T-E1	orf19.139-T	orf19.139-T		1	94	61	311	1	1	159	1	0	2	0	0	57	0	0	0	0	0	0	0	94	152
orf19.1390-T-E1	orf19.1390-T	orf19.1390-T		0	15	11	329	0	0	203	0	0	0	0	0	11	0	0	0	0	0	0	0	15	126
orf19.1391-T-E1	orf19.1391-T	orf19.1391-T		0	7	9	321	0	0	124	0	0	0	0	0	9	0	0	0	0	0	0	0	7	197
orf19.1392-T-E1	orf19.1392-T	orf19.1392-T		0	17	16	418	0	0	192	0	0	0	0	0	16	0	0	0	0	0	0	0	17	226
orf19.1393-T-E1	orf19.1393-T	orf19.1393-T		0	14	4	379	0	0	129	0	0	0	0	0	4	0	0	0	0	0	0	0	14	250
orf19.1394-T-E1	orf19.1394-T	orf19.1394-T		0	6	3	359	0	0	234	0	0	0	0	0	3	0	0	0	0	0	0	0	6	125
orf19.1395-T-E1	orf19.1395-T	orf19.1395-T		0	14	5	414	0	0	163	0	0	0	0	0	5	0	0	0	0	0	0	0	14	251
orf19.1396-T-E1	orf19.1396-T	orf19.1396-T		4	8	15	417	1	1	242	4	0	0	0	0	13	0	0	0	0	0	0	0	8	175
orf19.1397-T-E1	orf19.1397-T	orf19.1397-T		0	6	11	310	0	0	139	0	0	0	0	0	11	0	0	0	0	0	0	0	6	171
orf19.1400-T-E1	orf19.1400-T	orf19.1400-T		0	22	30	261	0	0	94	0	0	0	0	0	30	0	0	0	0	0	0	0	22	167
orf19.1401-T-E1	orf19.1401-T	orf19.1401-T		0	2	4	215	0	0	140	0	0	0	0	0	4	0	0	0	0	0	0	0	2	75
orf19.1402-T-E1	orf19.1402-T	orf19.1402-T		0	4	2	150	0	0	81	0	0	0	0	0	2	0	0	0	0	0	0	0	4	69
orf19.1403-T-E1	orf19.1403-T	orf19.1403-T		0	12	8	180	1	0	93	0	1	0	0	0	6	0	0	0	0	0	0	0	12	87
orf19.1404-T-E1	orf19.1404-T	orf19.1404-T		0	8	9	158	0	0	66	0	0	0	0	0	9	0	0	0	0	0	0	0	8	92
orf19.1405-T-E1	orf19.1405-T	orf19.1405-T		0	14	9	158	0	0	75	0	0	0	0	0	9	0	0	0	0	0	0	0	14	83
orf19.1406-T-E1	orf19.1406-T	orf19.1406-T		0	3	6	170	0	0	80	0	0	0	0	0	6	0	0	0	0	0	0	0	3	90
orf19.1409-T-E1	orf19.1409-T	orf19.1409-T		0	26	19	380	3	1	125	0	0	2	0	0	13	0	0	0	0	0	0	0	26	255
orf19.1409.1-T-E1	orf19.1409.1-T	orf19.1409.1-T		4	8	7	463	0	0	236	4	0	0	0	22	7	0	0	0	0	0	0	0	8	205
orf19.1409.2-T-E1	orf19.1409.2-T	orf19.1409.2-T		0	4	2	397	0	0	138	0	0	0	0	0	2	0	0	0	0	0	0	0	4	259
orf19.1409.3-T-E1	orf19.1409.3-T	orf19.1409.3-T		0	3	3	448	0	0	258	0	0	0	0	0	3	0	0	0	0	0	0	0	3	190
orf19.1411-T-E1	orf19.1411-T	orf19.1411-T		1	13	14	305	0	0	157	0	0	0	0	0	14	0	0	0	0	1	0	0	13	148
orf19.1412-T-E1	orf19.1412-T	orf19.1412-T		0	9	7	231	0	0	101	0	0	0	0	0	7	0	0	0	0	0	0	0	9	130
orf19.1413-T-E1	orf19.1413-T	orf19.1413-T		0	7	3	227	0	0	128	0	0	0	0	0	3	0	0	0	0	0	0	0	7	99
orf19.1414-T-E1	orf19.1414-T	orf19.1414-T		0	19	18	252	3	4	141	0	0	1	0	0	10	0	0	0	0	0	0	0	19	111
orf19.1415-T-E1	orf19.1415-T	orf19.1415-T		1	13	5	355	0	0	155	0	0	0	0	0	5	0	0	0	0	1	0	0	13	200
orf19.1416-T-E1	orf19.1416-T	orf19.1416-T		0	20	8	287	1	0	168	0	0	0	0	0	7	0	0	0	0	0	0	0	20	119
orf19.1417-T-E1	orf19.1417-T	orf19.1417-T		0	2	4	337	0	0	142	0	0	0	0	0	4	0	0	0	0	0	0	0	2	195
orf19.1418-T-E1	orf19.1418-T	orf19.1418-T		0	43	6	337	0	0	199	0	0	0	0	0	6	0	0	0	0	0	0	0	43	138
orf19.1420-T-E1	orf19.1420-T	orf19.1420-T		0	22	14	262	0	0	128	0	0	0	0	0	14	0	0	0	0	0	0	0	22	134
orf19.1421-T-E1	orf19.1421-T	orf19.1421-T		0	6	6	248	0	0	123	0	0	0	0	0	6	0	0	0	0	0	0	0	6	125
orf19.1422-T-E1	orf19.1422-T	orf19.1422-T		0	39	10	280	0	0	144	0	0	0	0	0	10	0	0	0	0	0	0	0	39	136
orf19.1424-T-E1	orf19.1424-T	orf19.1424-T		0	29	14	280	0	0	138	0	0	0	0	0	14	0	0	0	0	0	0	0	29	142
orf19.1426-T-E1	orf19.1426-T	orf19.1426-T		0	19	11	325	1	0	171	0	0	0	0	0	10	0	0	0	0	0	0	0	19	154
orf19.1427-T-E1	orf19.1427-T	orf19.1427-T		0	12	11	371	0	0	142	0	0	0	0	0	11	0	0	0	0	0	0	0	12	229
orf19.1428-T-E1	orf19.1428-T	orf19.1428-T		1	5	5	343	0	0	105	0	0	0	0	0	5	0	0	0	0	1	0	0	5	238
orf19.1429-T-E1	orf19.1429-T	orf19.1429-T		0	6	1	366	0	0	241	0	0	0	0	0	1	0	0	0	0	0	0	0	6	125
orf19.1430-T-E1	orf19.1430-T	orf19.1430-T		3	87	32	371	0	1	194	2	1	0	0	0	30	0	0	0	0	1	0	0	87	177
orf19.1433-T-E1	orf19.1433-T	orf19.1433-T		1	20	5	352	0	0	176	0	0	0	0	0	5	0	0	0	0	1	0	0	20	176
orf19.1433.1-T-E1	orf19.1433.1-T	orf19.1433.1-T		0	2	2	381	0	0	189	0	0	0	0	0	2	0	0	0	0	0	0	0	2	192
orf19.1434-T-E1	orf19.1434-T	orf19.1434-T		5	55	22	368	1	1	189	4	1	0	0	0	19	0	0	1	0	0	1	0	55	179
orf19.1435-T-E1	orf19.1435-T	orf19.1435-T		0	19	3	344	0	0	154	0	0	0	0	0	3	0	0	0	0	0	0	0	19	190
orf19.1438-T-E1	orf19.1438-T	orf19.1438-T		2	29	29	410	0	0	258	2	0	0	0	0	29	0	0	0	0	0	0	0	29	152
orf19.1439-T-E1	orf19.1439-T	orf19.1439-T		0	16	3	481	0	0	189	0	0	0	0	0	3	0	0	0	0	0	0	0	16	292
orf19.144-T-E1	orf19.144-T	orf19.144-T		12	25	75	484	14	5	275	11	10	12	0	0	34	0	0	0	0	1	0	0	25	209
orf19.1440-T-E1	orf19.1440-T	orf19.1440-T		0	33	26	496	0	0	209	0	0	0	0	0	26	0	0	0	0	0	0	0	33	287
orf19.1440.1-T-E1	orf19.1440.1-T	orf19.1440.1-T		0	5	2	474	0	0	200	0	0	0	0	0	2	0	0	0	0	0	0	0	5	274
orf19.1440.2-T-E1	orf19.1440.2-T	orf19.1440.2-T		0	0	3	381	0	0	129	0	0	0	0	0	3	0	0	0	0	0	0	0	0	252
orf19.1441-T-E1	orf19.1441-T	orf19.1441-T		6	10	16	265	2	2	128	6	2	2	0	0	8	0	0	0	0	0	0	0	10	137
orf19.1442-T-E1	orf19.1442-T	orf19.1442-T		0	20	11	271	0	1	114	0	0	0	0	0	10	0	0	0	0	0	0	0	20	157
orf19.1444-T-E1	orf19.1444-T	orf19.1444-T		0	12	13	232	3	1	95	0	1	1	0	0	7	0	0	0	0	0	0	0	12	137
orf19.1445-T-E1	orf19.1445-T	orf19.1445-T		0	26	24	228	0	1	106	0	0	2	0	0	21	0	0	0	0	0	0	0	26	122
orf19.1446-T-E1	orf19.1446-T	orf19.1446-T		0	12	10	291	0	0	97	0	0	0	0	0	10	0	0	0	0	0	0	0	12	194
orf19.1447-T-E1	orf19.1447-T	orf19.1447-T		0	18	29	302	0	0	169	0	0	0	0	0	29	0	0	0	0	0	0	0	18	133
orf19.1448-T-E1	orf19.1448-T	orf19.1448-T		0	3	0	332	0	0	130	0	0	0	0	0	0	0	0	0	0	0	0	0	3	202
orf19.1448.1-T-E2	orf19.1448.1-T	orf19.1448.1-T		0	4	0	319	0	0	188	0	0	0	0	2	0	0	0	1	0	0	0	0	3	130
orf19.1449-T-E1	orf19.1449-T	orf19.1449-T		0	6	4	313	0	0	194	0	0	0	0	0	4	0	0	1	0	0	0	1	5	119
orf19.145-T-E1	orf19.145-T	orf19.145-T		2	4	15	506	5	1	247	2	2	2	0	0	5	0	0	0	0	0	0	0	4	259
orf19.1450-T-E1	orf19.1450-T	orf19.1450-T		0	8	13	274	0	0	166	0	0	0	0	0	13	0	0	0	0	0	0	0	8	108
orf19.1451-T-E1	orf19.1451-T	orf19.1451-T		1	51	34	221	0	0	87	0	2	0	0	0	32	0	0	0	0	1	0	0	51	134
orf19.1453-T-E1	orf19.1453-T	orf19.1453-T		0	23	17	187	4	0	94	0	0	0	0	0	13	0	0	0	0	0	0	0	23	93
orf19.1456-T-E1	orf19.1456-T	orf19.1456-T		3	4	5	163	0	0	84	3	0	0	0	0	5	0	0	0	0	1	0	0	4	79
orf19.1457-T-E1	orf19.1457-T	orf19.1457-T		0	17	5	164	0	0	74	0	0	0	0	0	5	0	0	0	0	0	0	0	17	90
orf19.1458-T-E1	orf19.1458-T	orf19.1458-T		0	5	8	171	0	0	87	0	0	0	0	0	8	0	0	0	0	0	0	0	5	84
orf19.1459-T-E1	orf19.1459-T	orf19.1459-T		0	9	12	161	0	0	76	0	0	0	0	0	12	0	0	0	0	0	0	0	9	85
orf19.1460-T-E1	orf19.1460-T	orf19.1460-T		0	18	11	168	0	0	89	0	0	0	0	0	11	0	0	0	0	0	0	0	18	79
orf19.1461-T-E1	orf19.1461-T	orf19.1461-T		0	12	8	164	0	0	76	0	0	0	0	0	8	0	0	0	0	0	0	0	12	88
orf19.1462-T-E1	orf19.1462-T	orf19.1462-T		0	20	7	205	0	0	117	0	1	0	0	0	6	0	0	0	0	0	0	0	20	88
orf19.1464-T-E1	orf19.1464-T	orf19.1464-T		0	12	10	196	0	0	117	0	0	0	0	0	10	0	0	0	0	0	0	0	12	79
orf19.1465-T-E1	orf19.1465-T	orf19.1465-T		1	7	8	178	0	0	107	0	0	0	0	0	8	0	0	1	0	0	1	0	7	71
orf19.1466-T-E1	orf19.1466-T	orf19.1466-T		0	10	7	191	0	0	99	0	0	0	0	0	7	0	0	0	0	0	0	0	10	92
orf19.1467-T-E1	orf19.1467-T	orf19.1467-T		0	5	1	210	0	0	88	0	0	0	0	0	1	0	0	0	0	0	0	0	5	122
orf19.1468-T-E1	orf19.1468-T	orf19.1468-T		0	18	1	204	0	0	114	0	0	0	0	0	1	0	0	0	0	0	0	0	18	90
orf19.147-T-E1	orf19.147-T	orf19.147-T		2	27	40	439	5	3	223	2	3	7	0	0	22	0	0	0	0	0	0	0	27	216
orf19.1470-T-E1	orf19.1470-T	orf19.1470-T		0	2	0	180	0	0	107	0	0	0	0	0	0	0	0	0	0	0	0	0	2	73
orf19.1471-T-E1	orf19.1471-T	orf19.1471-T		0	2	2	144	0	0	53	0	0	0	0	0	2	0	0	0	0	0	0	0	2	91
orf19.1473-T-E1	orf19.1473-T	orf19.1473-T		0	4	3	167	0	0	76	0	0	0	0	0	3	0	0	0	0	0	0	0	4	91
orf19.1474-T-E1	orf19.1474-T	orf19.1474-T		0	32	12	156	0	1	80	0	0	0	0	0	11	0	0	0	0	0	0	0	32	76
orf19.1476-T-E1	orf19.1476-T	orf19.1476-T		0	16	16	122	0	0	63	0	0	0	0	0	16	0	0	0	0	0	0	0	16	59
orf19.1477-T-E1	orf19.1477-T	orf19.1477-T		0	5	1	145	0	0	81	0	0	0	0	0	1	0	0	0	0	0	0	0	5	64
orf19.1478-T-E1	orf19.1478-T	orf19.1478-T		1	14	4	197	0	0	87	0	0	0	0	0	4	0	0	0	0	1	0	0	14	110
orf19.1479-T-E1	orf19.1479-T	orf19.1479-T		2	14	22	183	3	3	67	2	1	0	0	0	15	0	0	0	0	0	0	0	14	116
orf19.1480-T-E1	orf19.1480-T	orf19.1480-T		2	5	0	200	0	0	105	2	0	0	0	0	0	0	0	0	0	0	0	0	5	95
orf19.1481-T-E1	orf19.1481-T	orf19.1481-T		0	15	31	255	0	0	108	0	0	1	0	0	30	0	0	0	0	0	0	0	15	147
orf19.1482-T-E1	orf19.1482-T	orf19.1482-T		0	1	0	255	0	0	143	0	0	0	0	0	0	0	0	0	0	0	0	0	1	112
orf19.1483-T-E1	orf19.1483-T	orf19.1483-T		0	2	0	256	0	0	106	0	0	0	0	0	0	0	0	0	0	0	0	0	2	150
orf19.1484-T-E1	orf19.1484-T	orf19.1484-T		1	3	12	264	3	6	158	0	0	0	0	0	4	0	0	0	0	1	0	0	3	106
orf19.1485-T-E1	orf19.1485-T	orf19.1485-T		0	3	3	277	0	0	99	0	0	0	0	0	3	0	0	0	0	0	0	0	3	178
orf19.1486-T-E1	orf19.1486-T	orf19.1486-T		0	0	3	342	0	1	144	0	0	0	0	0	2	0	0	0	0	0	0	0	0	198
orf19.1488-T-E1	orf19.1488-T	orf19.1488-T		2	1	10	335	3	0	195	2	0	0	0	0	7	0	0	0	0	0	0	0	1	140
orf19.149-T-E1	orf19.149-T	orf19.149-T		18	5	19	409	0	0	206	17	2	1	0	0	16	0	0	0	0	1	0	0	5	203
orf19.1490-T-E1	orf19.1490-T	orf19.1490-T		1	15	28	283	4	0	134	1	1	0	0	0	23	0	0	0	0	0	0	0	15	149
orf19.1490.1-T-E1	orf19.1490.1-T	orf19.1490.1-T		0	2	5	197	0	0	134	0	0	0	0	0	5	0	0	0	0	0	0	0	2	63
orf19.1491-T-E1	orf19.1491-T	orf19.1491-T		0	5	20	223	1	1	111	0	1	1	0	0	16	0	0	0	0	0	0	0	5	112
orf19.1492-T-E1	orf19.1492-T	orf19.1492-T		2	10	29	252	9	4	122	2	0	0	0	0	16	0	0	0	0	0	0	0	10	130
orf19.1493-T-E1	orf19.1493-T	orf19.1493-T		0	14	11	257	0	3	115	0	0	0	0	0	8	0	0	0	0	0	0	0	14	142
orf19.1494-T-E1	orf19.1494-T	orf19.1494-T		0	10	12	253	2	2	133	0	0	0	0	7	8	0	0	0	0	0	0	0	10	113
orf19.1495-T-E1	orf19.1495-T	orf19.1495-T		0	9	13	261	0	1	122	0	0	5	0	0	7	0	0	0	0	0	0	0	9	139
orf19.1496-T-E1	orf19.1496-T	orf19.1496-T		0	5	10	301	0	0	124	0	3	4	0	0	3	0	0	0	0	0	0	0	5	177
orf19.1497-T-E1	orf19.1497-T	orf19.1497-T		2	6	11	312	1	0	140	1	0	0	0	0	10	0	0	1	0	0	1	0	6	172
orf19.1499-T-E1	orf19.1499-T	orf19.1499-T		2	21	35	338	11	4	171	2	1	0	0	0	19	0	0	0	0	0	0	0	21	167
orf19.150-T-E1	orf19.150-T	orf19.150-T		0	3	0	446	0	0	188	0	0	0	0	0	0	0	0	0	0	0	0	0	3	258
orf19.1500-T-E1	orf19.1500-T	orf19.1500-T		6	7	46	305	4	4	127	5	8	9	0	0	21	0	0	1	0	0	1	0	7	178
orf19.1502-T-E1	orf19.1502-T	orf19.1502-T		1	3	6	306	1	1	163	1	0	0	0	0	4	0	0	0	0	0	0	0	3	143
orf19.1504-T-E1	orf19.1504-T	orf19.1504-T		2	22	42	349	2	4	160	2	9	5	0	0	22	0	0	0	0	0	0	0	22	189
orf19.1505-T-E1	orf19.1505-T	orf19.1505-T		0	4	15	332	2	0	169	0	1	3	0	0	9	0	0	0	0	0	0	0	4	163
orf19.1506-T-E1	orf19.1506-T	orf19.1506-T		5	2	9	339	1	0	185	4	3	2	0	0	3	0	0	0	0	1	0	0	2	154
orf19.1507-T-E1	orf19.1507-T	orf19.1507-T		0	12	28	341	2	3	187	0	3	4	0	0	16	0	0	0	0	0	0	0	12	154
orf19.1508-T-E1	orf19.1508-T	orf19.1508-T		5	2	4	304	1	1	159	5	0	0	0	0	2	0	0	0	0	0	0	0	2	145
orf19.1509-T-E1	orf19.1509-T	orf19.1509-T		4	19	34	288	9	4	154	4	5	0	0	0	16	0	0	0	0	0	0	0	19	134
orf19.151-T-E1	orf19.151-T	orf19.151-T		5	10	32	442	2	7	229	5	2	3	0	0	18	0	0	1	0	0	1	0	10	213
orf19.1510-T-E1	orf19.1510-T	orf19.1510-T		0	5	14	241	1	0	131	0	2	3	0	0	8	0	0	0	0	0	0	0	5	110
orf19.1513-T-E1	orf19.1513-T	orf19.1513-T		1	73	58	235	8	1	128	0	4	2	0	0	43	0	0	0	0	1	0	0	73	107
orf19.1514-T-E1	orf19.1514-T	orf19.1514-T		0	9	3	243	0	0	140	0	0	0	0	0	3	0	0	0	0	0	0	0	9	103
orf19.1515-T-E1	orf19.1515-T	orf19.1515-T		0	12	9	252	0	0	104	0	0	0	0	0	9	0	0	0	0	0	0	0	12	148
orf19.1516-T-E1	orf19.1516-T	orf19.1516-T		0	23	18	290	0	0	181	0	0	1	0	0	17	0	0	1	0	0	0	1	22	109
orf19.1517-T-E1	orf19.1517-T	orf19.1517-T		0	21	1	298	0	0	155	0	0	0	0	2	1	0	0	0	0	0	0	0	21	141
orf19.1519-T-E1	orf19.1519-T	orf19.1519-T		0	53	54	297	1	1	147	0	0	0	0	0	52	0	0	0	0	0	0	0	53	150
orf19.1522-T-E1	orf19.1522-T	orf19.1522-T		1	39	41	335	1	0	157	0	1	1	0	0	38	0	0	1	0	0	1	0	39	178
orf19.1523-T-E1	orf19.1523-T	orf19.1523-T		2	33	11	286	0	0	154	2	0	0	0	0	11	0	0	0	0	0	0	0	33	132
orf19.1524-T-E1	orf19.1524-T	orf19.1524-T		0	12	19	268	0	0	97	0	0	0	0	0	19	0	0	0	0	0	0	0	12	171
orf19.1525-T-E1	orf19.1525-T	orf19.1525-T		0	10	7	225	0	0	75	0	0	0	0	0	7	0	0	0	0	0	0	0	10	150
orf19.1526-T-E1	orf19.1526-T	orf19.1526-T		0	34	31	258	10	8	150	0	2	0	0	0	11	0	0	0	0	0	0	0	34	108
orf19.1527-T-E1	orf19.1527-T	orf19.1527-T		1	10	8	213	0	0	61	0	1	2	0	0	5	0	0	1	0	1	0	1	9	152
orf19.1528-T-E1	orf19.1528-T	orf19.1528-T		0	7	2	240	0	0	159	0	0	0	0	0	2	0	0	0	0	0	0	0	7	81
orf19.1529-T-E1	orf19.1529-T	orf19.1529-T		2	13	26	246	2	2	91	2	0	1	0	0	21	0	0	0	0	1	0	0	13	155
orf19.1530-T-E1	orf19.1530-T	orf19.1530-T		2	4	5	306	0	0	133	2	0	0	0	0	5	0	0	1	1	0	1	0	4	173
orf19.1531-T-E1	orf19.1531-T	orf19.1531-T		8	11	28	350	4	0	146	8	0	0	0	0	24	0	0	0	0	0	0	0	11	204
orf19.1532-T-E1	orf19.1532-T	orf19.1532-T		2	8	20	366	0	0	198	2	0	0	0	0	20	0	0	0	0	0	0	0	8	168
orf19.1533-T-E1	orf19.1533-T	orf19.1533-T		0	8	7	410	0	0	229	0	0	0	0	0	7	0	0	0	0	0	0	0	8	181
orf19.1534-T-E1	orf19.1534-T	orf19.1534-T		4	12	41	427	5	11	228	4	3	2	0	0	20	0	0	0	0	0	0	0	12	199
orf19.1535-T-E1	orf19.1535-T	orf19.1535-T		0	3	25	425	4	0	204	0	7	6	0	0	8	0	0	0	0	0	0	0	3	221
orf19.1536-T-E1	orf19.1536-T	orf19.1536-T		4	8	25	396	4	8	166	4	1	2	0	0	10	0	0	0	0	0	0	0	8	230
orf19.1538-T-E1	orf19.1538-T	orf19.1538-T		0	7	33	379	3	3	212	0	5	6	0	0	16	0	0	0	0	0	0	0	7	167
orf19.1539-T-E1	orf19.1539-T	orf19.1539-T		1	5	13	377	2	1	202	1	0	1	0	0	9	0	0	1	0	0	0	0	5	175
orf19.154-T-E1	orf19.154-T	orf19.154-T		0	8	26	404	1	2	230	0	4	7	0	0	12	0	0	0	0	0	0	0	8	174
orf19.1541-T-E1	orf19.1541-T	orf19.1541-T		3	22	29	337	0	1	167	2	1	3	0	0	24	0	0	2	0	0	1	1	21	170
orf19.1542-T-E1	orf19.1542-T	orf19.1542-T		0	13	20	326	2	0	163	0	0	1	0	0	17	0	0	0	0	0	0	0	13	163
orf19.1543-T-E1	orf19.1543-T	orf19.1543-T		0	14	8	374	0	0	170	0	1	0	0	0	7	0	0	0	0	0	0	0	14	204
orf19.1544-T-E1	orf19.1544-T	orf19.1544-T		0	14	16	358	0	3	195	0	0	1	0	0	12	0	0	0	0	0	0	0	14	163
orf19.1545-T-E1	orf19.1545-T	orf19.1545-T		0	10	2	369	0	0	179	0	0	0	0	0	2	0	0	0	0	0	0	0	10	190
orf19.1546-T-E1	orf19.1546-T	orf19.1546-T		0	18	4	403	0	0	199	0	0	0	0	0	4	0	0	0	0	0	0	0	18	204
orf19.1547-T-E1	orf19.1547-T	orf19.1547-T		0	21	24	386	0	0	207	0	0	0	0	0	24	0	0	0	0	0	0	0	21	179
orf19.1548-T-E1	orf19.1548-T	orf19.1548-T		0	13	10	416	1	0	195	0	0	0	0	0	9	0	0	0	0	0	0	0	13	221
orf19.1549-T-E1	orf19.1549-T	orf19.1549-T		0	9	2	420	0	0	211	0	0	0	0	0	2	0	0	0	0	0	0	0	9	209
orf19.155-T-E1	orf19.155-T	orf19.155-T		0	7	1	381	0	0	188	0	0	0	0	0	1	0	0	0	0	0	0	0	7	193
orf19.1551-T-E1	orf19.1551-T	orf19.1551-T		8	10	15	431	0	0	248	6	0	0	0	0	15	0	0	0	0	2	0	0	10	183
orf19.1552-T-E1	orf19.1552-T	orf19.1552-T		0	9	2	463	0	0	195	0	0	0	0	0	2	0	0	0	0	0	0	0	9	268
orf19.1553-T-E2	orf19.1553-T	orf19.1553-T		0	22	12	480	1	0	197	0	2	1	0	6	8	0	0	3	0	0	0	0	19	280
orf19.1555-T-E1	orf19.1555-T	orf19.1555-T		7	95	82	399	2	1	189	6	0	0	0	0	79	0	0	0	0	1	0	0	95	210
orf19.1557-T-E1	orf19.1557-T	orf19.1557-T		1	28	19	462	0	0	266	0	0	0	0	0	19	0	0	0	0	1	0	0	28	196
orf19.1559-T-E1	orf19.1559-T	orf19.1559-T		0	17	4	481	0	0	276	0	0	0	0	0	4	0	0	0	0	0	0	0	17	205
orf19.156-T-E1	orf19.156-T	orf19.156-T		8	27	21	350	0	0	183	7	0	0	0	0	21	0	0	0	0	1	0	0	27	167
orf19.1560-T-E1	orf19.1560-T	orf19.1560-T		0	32	5	473	0	0	219	0	0	0	0	0	5	0	0	0	0	0	0	0	32	254
orf19.1562-T-E1	orf19.1562-T	orf19.1562-T		0	5	7	388	0	0	200	0	1	0	0	0	6	0	0	0	0	0	0	0	5	188
orf19.1563-T-E1	orf19.1563-T	orf19.1563-T		1	28	9	351	0	0	134	0	0	0	0	0	9	0	0	1	0	1	0	1	27	217
orf19.1564-T-E1	orf19.1564-T	orf19.1564-T		0	13	3	303	0	0	106	0	0	0	0	0	3	0	0	0	0	0	0	0	13	197
orf19.1565-T-E1	orf19.1565-T	orf19.1565-T		0	32	14	256	0	1	197	0	0	0	0	0	13	0	0	0	0	0	0	0	32	59
orf19.1566-T-E1	orf19.1566-T	orf19.1566-T		0	30	10	211	0	0	52	0	0	0	0	0	10	0	0	0	0	0	0	0	30	159
orf19.1567-T-E1	orf19.1567-T	orf19.1567-T		0	9	10	164	0	0	69	0	0	0	0	0	10	0	0	0	0	0	0	0	9	95
orf19.1569-T-E1	orf19.1569-T	orf19.1569-T		0	26	14	120	0	0	42	0	0	0	0	0	14	0	0	0	0	0	0	0	26	78
orf19.1570-T-E1	orf19.1570-T	orf19.1570-T		0	8	11	140	0	0	76	0	0	1	0	0	10	0	0	0	0	0	0	0	8	64
orf19.1571-T-E2	orf19.1571-T	orf19.1571-T		0	4	5	120	0	0	53	0	0	0	0	1	5	0	0	0	0	0	0	0	4	66
orf19.1573-T-E1	orf19.1573-T	orf19.1573-T		0	20	13	142	0	0	80	0	0	0	0	0	13	0	0	0	0	0	0	0	20	62
orf19.1574-T-E1	orf19.1574-T	orf19.1574-T		2	6	16	117	1	1	62	2	0	1	0	0	13	0	0	0	0	1	0	0	6	55
orf19.1575-T-E1	orf19.1575-T	orf19.1575-T		0	2	0	143	0	0	77	0	0	0	0	0	0	0	0	0	0	0	0	0	2	66
orf19.1576-T-E1	orf19.1576-T	orf19.1576-T		2	4	6	144	0	0	79	0	1	0	0	0	5	0	0	0	0	2	0	0	4	65
orf19.1577-T-E1	orf19.1577-T	orf19.1577-T		0	7	12	136	1	0	65	0	1	0	0	0	10	0	0	0	0	0	0	0	7	71
orf19.1578-T-E1	orf19.1578-T	orf19.1578-T		0	27	30	208	1	2	130	0	0	0	0	0	27	0	0	0	0	0	0	0	27	78
orf19.158-T-E1	orf19.158-T	orf19.158-T		1	8	5	370	0	2	197	0	0	1	0	0	2	0	0	0	0	1	0	0	8	173
orf19.1580-T-E1	orf19.1580-T	orf19.1580-T		0	19	27	170	1	1	71	0	1	1	0	0	23	0	0	0	0	0	0	0	19	99
orf19.1581-T-E1	orf19.1581-T	orf19.1581-T		2	5	7	187	0	3	67	1	0	0	0	0	4	0	0	0	0	1	0	0	5	120
orf19.1582-T-E1	orf19.1582-T	orf19.1582-T		0	17	4	210	0	0	81	0	0	0	0	0	4	0	0	0	0	0	0	0	17	129
orf19.1584-T-E1	orf19.1584-T	orf19.1584-T		0	11	5	227	0	0	115	0	0	0	0	0	5	0	0	0	0	0	0	0	11	112
orf19.1585-T-E1	orf19.1585-T	orf19.1585-T		0	7	4	195	0	0	118	0	0	0	0	0	4	0	0	0	0	0	0	0	7	77
orf19.1586-T-E1	orf19.1586-T	orf19.1586-T		2	15	5	176	0	0	82	0	0	0	0	0	5	0	0	0	0	2	0	0	15	94
orf19.1587-T-E1	orf19.1587-T	orf19.1587-T		0	21	18	183	0	0	98	0	0	0	0	0	18	0	0	0	0	0	0	0	21	85
orf19.1588-T-E1	orf19.1588-T	orf19.1588-T		0	1	4	178	0	0	64	0	0	0	0	0	4	0	0	0	0	0	0	0	1	114
orf19.1589-T-E1	orf19.1589-T	orf19.1589-T		0	4	4	216	0	1	98	0	0	0	0	0	3	0	0	1	0	0	0	1	3	118
orf19.1589.1-T-E1	orf19.1589.1-T	orf19.1589.1-T		0	19	13	177	0	0	88	0	0	0	0	0	13	0	0	0	0	0	0	0	19	89
orf19.1590-T-E1	orf19.1590-T	orf19.1590-T		6	28	47	337	4	2	156	6	2	1	0	0	38	0	0	0	0	0	0	0	28	181
orf19.1591-T-E1	orf19.1591-T	orf19.1591-T		0	24	3	420	0	0	212	0	0	0	0	0	3	0	0	0	0	0	0	0	24	208
orf19.1592-T-E1	orf19.1592-T	orf19.1592-T		2	15	13	421	0	2	214	2	0	2	0	0	9	0	0	1	0	0	0	1	14	207
orf19.1595-T-E1	orf19.1595-T	orf19.1595-T		0	14	34	466	6	2	81	0	1	3	0	0	22	0	0	0	0	0	0	0	14	385
orf19.1596-T-E1	orf19.1596-T	orf19.1596-T		42	52	121	371	5	5	109	36	1	1	0	0	109	0	0	0	0	8	0	0	52	262
orf19.1597-T-E1	orf19.1597-T	orf19.1597-T		0	7	7	184	0	0	119	0	0	0	0	0	7	0	0	0	0	0	0	0	7	65
orf19.1598-T-E1	orf19.1598-T	orf19.1598-T		0	13	5	187	0	0	66	0	0	0	0	0	5	0	0	0	0	0	0	0	13	121
orf19.1599-T-E1	orf19.1599-T	orf19.1599-T		0	1	2	204	0	0	87	0	0	0	0	0	2	0	0	0	0	0	0	0	1	117
orf19.1600-T-E1	orf19.1600-T	orf19.1600-T		0	15	13	264	0	0	141	0	0	2	0	0	11	0	0	0	0	0	0	0	15	123
orf19.1601-T-E1	orf19.1601-T	orf19.1601-T		0	10	1	336	0	0	230	0	0	0	0	0	1	0	0	0	0	0	0	0	10	106
orf19.1604-T-E2	orf19.1604-T	orf19.1604-T		1	19	22	390	0	0	293	0	1	0	0	11	21	0	0	0	0	1	0	0	19	86
orf19.1605-T-E1	orf19.1605-T	orf19.1605-T		0	20	22	184	0	0	95	0	0	1	0	0	21	0	0	0	0	0	0	0	20	89
orf19.1606-T-E1	orf19.1606-T	orf19.1606-T		17	10	83	568	10	13	253	16	6	15	0	0	39	0	0	0	0	1	0	0	10	315
orf19.1607-T-E1	orf19.1607-T	orf19.1607-T		0	12	39	545	4	12	167	0	4	1	0	0	18	0	0	0	0	0	0	0	12	378
orf19.1608-T-E1	orf19.1608-T	orf19.1608-T		0	19	17	425	4	0	224	0	0	0	0	0	13	0	0	0	0	0	0	0	19	201
orf19.1609-T-E1	orf19.1609-T	orf19.1609-T		0	10	38	360	2	1	146	0	6	11	0	0	18	0	0	0	0	0	0	0	10	214
orf19.1610-T-E1	orf19.1610-T	orf19.1610-T		10	13	47	340	1	4	161	9	0	0	0	0	42	0	0	1	0	0	1	0	13	179
orf19.1611-T-E1	orf19.1611-T	orf19.1611-T		2	3	31	329	2	0	120	2	1	9	0	0	19	0	0	0	0	0	0	0	3	209
orf19.1613-T-E1	orf19.1613-T	orf19.1613-T		0	17	7	449	0	0	235	0	0	0	0	0	7	0	0	0	0	0	0	0	17	214
orf19.1614-T-E1	orf19.1614-T	orf19.1614-T		1	20	7	507	1	2	179	1	0	0	0	0	4	0	0	0	0	0	0	0	20	328
orf19.1616-T-E1	orf19.1616-T	orf19.1616-T		15	69	152	371	3	4	173	13	3	0	0	0	142	0	0	0	0	3	0	0	69	198
orf19.1617-T-E1	orf19.1617-T	orf19.1617-T		0	11	10	506	0	0	361	0	0	0	0	0	10	0	0	0	0	0	0	0	11	145
orf19.1618-T-E1	orf19.1618-T	orf19.1618-T		0	17	5	400	0	0	166	0	0	0	0	0	5	0	0	0	0	0	0	0	17	234
orf19.1618.1-T-E1	orf19.1618.1-T	orf19.1618.1-T		1	0	1	316	0	0	154	1	0	0	0	0	1	0	0	0	0	0	0	0	0	162
orf19.1619-T-E1	orf19.1619-T	orf19.1619-T		2	20	26	248	0	0	114	2	0	0	0	0	26	0	0	0	0	0	0	0	20	134
orf19.1620-T-E1	orf19.1620-T	orf19.1620-T		1	3	6	269	0	0	110	0	0	0	0	0	6	0	0	0	0	1	0	0	3	159
orf19.1621-T-E1	orf19.1621-T	orf19.1621-T		0	12	9	247	0	0	99	0	0	1	0	0	8	0	0	0	0	0	0	0	12	148
orf19.1622-T-E1	orf19.1622-T	orf19.1622-T		2	20	43	285	4	3	164	2	3	3	0	0	30	0	0	0	0	0	0	0	20	121
orf19.1623-T-E1	orf19.1623-T	orf19.1623-T		0	25	6	279	0	0	98	0	0	1	0	0	5	0	0	0	0	0	0	0	25	181
orf19.1624-T-E2	orf19.1624-T	orf19.1624-T		0	17	20	335	0	0	160	0	0	0	0	6	20	0	0	0	0	0	0	0	17	169
orf19.1624.1-T-E1	orf19.1624.1-T	orf19.1624.1-T		1	5	5	310	0	0	162	1	0	0	0	0	5	0	0	1	0	0	0	1	4	148
orf19.1625-T-E1	orf19.1625-T	orf19.1625-T		0	6	1	320	0	0	137	0	0	0	0	0	1	0	0	0	0	0	0	0	6	183
orf19.1626-T-E1	orf19.1626-T	orf19.1626-T		0	12	5	305	0	0	113	0	0	0	0	0	5	0	0	0	0	0	0	0	12	192
orf19.1628-T-E1	orf19.1628-T	orf19.1628-T		0	25	6	262	0	0	116	0	0	0	0	0	6	0	0	0	0	0	0	0	25	146
orf19.163-T-E1	orf19.163-T	orf19.163-T		0	4	6	256	1	2	95	0	0	0	0	0	3	0	0	0	0	0	0	0	4	161
orf19.1630-T-E3	orf19.1630-T	orf19.1630-T		0	18	26	266	1	2	108	0	2	1	0	9	20	0	0	1	0	0	0	0	17	150
orf19.1631-T-E1	orf19.1631-T	orf19.1631-T		0	6	1	243	0	0	118	0	0	0	0	0	1	0	0	0	0	0	0	0	6	125
orf19.1632-T-E1	orf19.1632-T	orf19.1632-T		0	11	5	239	0	0	117	0	0	0	0	0	5	0	0	0	0	0	0	0	11	122
orf19.1633-T-E1	orf19.1633-T	orf19.1633-T		0	32	15	232	0	0	116	0	0	0	0	0	15	0	0	0	0	0	0	0	32	116
orf19.1634-T-E1	orf19.1634-T	orf19.1634-T		0	13	8	225	0	0	111	0	1	0	0	0	7	0	0	0	0	0	0	0	13	114
orf19.1635-T-E1	orf19.1635-T	orf19.1635-T		0	5	0	218	0	0	118	0	0	0	0	0	0	0	0	0	0	0	0	0	5	100
orf19.1636-T-E1	orf19.1636-T	orf19.1636-T		0	17	7	244	0	0	127	0	0	0	0	0	7	0	0	0	0	0	0	0	17	117
orf19.1637-T-E1	orf19.1637-T	orf19.1637-T		0	6	7	222	0	0	110	0	0	0	0	0	7	0	0	0	0	0	0	0	6	112
orf19.1638-T-E1	orf19.1638-T	orf19.1638-T		0	29	25	213	0	0	108	0	0	0	0	0	25	0	0	0	0	0	0	0	29	105
orf19.1639-T-E1	orf19.1639-T	orf19.1639-T		0	15	6	200	0	0	87	0	0	0	0	0	6	0	0	0	0	0	0	0	15	113
orf19.164-T-E1	orf19.164-T	orf19.164-T		0	11	6	275	0	0	152	0	0	1	0	0	5	0	0	0	0	0	0	0	11	123
orf19.1641-T-E1	orf19.1641-T	orf19.1641-T		1	6	10	199	0	0	111	0	0	0	0	0	10	0	0	0	0	1	0	0	6	88
orf19.1642-T-E1	orf19.1642-T	orf19.1642-T		0	3	2	201	0	0	78	0	0	0	0	0	2	0	0	0	0	0	0	0	3	123
orf19.1643-T-E1	orf19.1643-T	orf19.1643-T		1	6	2	198	0	0	110	0	0	0	0	0	2	0	0	0	0	1	0	0	6	88
orf19.1646-T-E1	orf19.1646-T	orf19.1646-T		3	24	10	175	0	0	90	2	1	0	0	0	9	0	0	1	0	0	1	0	24	85
orf19.1647-T-E2	orf19.1647-T	orf19.1647-T		0	10	7	162	0	0	83	0	0	0	0	2	7	0	0	0	0	0	0	0	10	77
orf19.1648-T-E1	orf19.1648-T	orf19.1648-T		2	41	22	258	0	0	80	2	0	0	0	0	22	0	0	0	0	0	0	0	41	178
orf19.1649-T-E1	orf19.1649-T	orf19.1649-T		0	13	3	275	0	1	85	0	0	0	0	0	2	0	0	0	0	0	0	0	13	190
orf19.1650-T-E1	orf19.1650-T	orf19.1650-T		0	3	0	273	0	0	186	0	0	0	0	0	0	0	0	0	0	0	0	0	3	87
orf19.1651-T-E1	orf19.1651-T	orf19.1651-T		0	4	3	258	0	0	136	0	0	0	0	0	3	0	0	0	0	0	0	0	4	122
orf19.1652-T-E1	orf19.1652-T	orf19.1652-T		0	15	4	293	0	0	101	0	0	0	0	0	4	0	0	0	0	0	0	0	15	192
orf19.1653-T-E1	orf19.1653-T	orf19.1653-T		2	4	10	287	0	0	154	2	0	0	0	0	10	0	0	0	0	0	0	0	4	133
orf19.1654-T-E1	orf19.1654-T	orf19.1654-T		0	7	4	255	0	0	159	0	0	0	0	0	4	0	0	0	0	0	0	0	7	96
orf19.1655-T-E1	orf19.1655-T	orf19.1655-T		0	22	3	291	0	0	89	0	0	0	0	0	3	0	0	0	0	0	0	0	22	202
orf19.1655.3-T-E1	orf19.1655.3-T	orf19.1655.3-T		0	1	0	337	0	0	176	0	0	0	0	0	0	0	0	0	0	0	0	0	1	161
orf19.1656-T-E1	orf19.1656-T	orf19.1656-T		4	25	29	336	9	0	134	4	0	1	0	0	19	0	0	0	0	0	0	0	25	202
orf19.1658-T-E2	orf19.1658-T	orf19.1658-T		0	12	4	312	0	1	110	0	0	0	0	19	3	0	0	0	0	0	0	0	12	183
orf19.1659-T-E1	orf19.1659-T	orf19.1659-T		0	17	12	276	0	0	146	0	0	0	0	0	12	0	0	0	0	0	0	0	17	130
orf19.166-T-E1	orf19.166-T	orf19.166-T		2	30	27	329	3	2	168	2	1	1	0	0	20	0	0	0	0	0	0	0	30	161
orf19.1661-T-E1	orf19.1661-T	orf19.1661-T		0	12	10	239	1	0	115	0	0	1	0	0	8	0	0	0	0	0	0	0	12	124
orf19.1662-T-E1	orf19.1662-T	orf19.1662-T		0	9	9	232	0	0	109	0	1	0	0	0	8	0	0	0	0	0	0	0	9	123
orf19.1663-T-E1	orf19.1663-T	orf19.1663-T		5	10	4	226	0	0	113	0	0	5	0	0	4	0	0	0	0	5	0	0	10	113
orf19.1664-T-E1	orf19.1664-T	orf19.1664-T		4	20	23	224	0	0	115	4	2	1	0	0	20	0	0	0	0	0	0	0	20	109
orf19.1665-T-E1	orf19.1665-T	orf19.1665-T		0	6	3	240	0	0	126	0	0	0	0	0	3	0	0	0	0	0	0	0	6	114
orf19.1666-T-E1	orf19.1666-T	orf19.1666-T		0	12	20	221	2	1	117	0	1	4	0	0	12	0	0	1	0	0	0	1	11	104
orf19.1667-T-E1	orf19.1667-T	orf19.1667-T		1	30	28	229	0	0	105	0	0	0	0	0	28	0	0	0	0	1	0	0	30	124
orf19.1667.1-T-E1	orf19.1667.1-T	orf19.1667.1-T		0	5	2	197	0	0	87	0	0	0	0	0	2	0	0	0	0	0	0	0	5	110
orf19.1668-T-E1	orf19.1668-T	orf19.1668-T		0	17	25	198	0	0	82	0	0	0	0	0	25	0	0	0	0	0	0	0	17	116
orf19.1669-T-E1	orf19.1669-T	orf19.1669-T		0	15	5	290	0	0	123	0	0	0	0	0	5	0	0	0	0	0	0	0	15	167
orf19.1670-T-E1	orf19.1670-T	orf19.1670-T		4	28	41	289	5	0	198	4	2	4	0	0	30	0	0	0	0	0	0	0	28	91
orf19.1671-T-E1	orf19.1671-T	orf19.1671-T		0	12	6	309	0	0	91	0	0	0	0	0	6	0	0	0	0	0	0	0	12	218
orf19.1671.1-T-E1	orf19.1671.1-T	orf19.1671.1-T		0	5	7	301	1	0	128	0	0	0	0	0	6	0	0	1	0	0	0	1	4	173
orf19.1672-T-E1	orf19.1672-T	orf19.1672-T		2	18	17	293	0	0	128	2	1	1	0	0	15	0	0	0	0	0	0	0	18	165
orf19.1673-T-E1	orf19.1673-T	orf19.1673-T		3	9	18	238	4	3	143	3	1	1	0	0	9	0	0	0	0	0	0	0	9	95
orf19.1674-T-E1	orf19.1674-T	orf19.1674-T		0	13	5	333	0	0	129	0	0	0	0	0	5	0	0	0	0	0	0	0	13	204
orf19.1675-T-E1	orf19.1675-T	orf19.1675-T		0	8	6	344	0	1	137	0	0	0	0	0	5	0	0	0	0	0	0	0	8	207
orf19.1676-T-E1	orf19.1676-T	orf19.1676-T		1	13	16	326	1	0	171	0	1	1	0	0	13	0	0	0	0	1	0	0	13	155
orf19.1677-T-E1	orf19.1677-T	orf19.1677-T		1	8	11	302	0	0	192	0	0	0	0	0	11	0	0	0	0	1	0	0	8	110
orf19.1678-T-E1	orf19.1678-T	orf19.1678-T		1	0	4	322	0	0	205	0	0	0	0	0	4	0	0	0	0	1	0	0	0	117
orf19.1679-T-E1	orf19.1679-T	orf19.1679-T		0	5	12	286	0	1	102	0	0	0	0	0	11	0	0	0	0	0	0	0	5	184
orf19.168-T-E1	orf19.168-T	orf19.168-T		2	7	19	318	1	1	169	2	0	6	0	0	11	0	0	0	0	0	0	0	7	149
orf19.1680-T-E1	orf19.1680-T	orf19.1680-T		0	19	0	303	0	0	175	0	0	0	0	2	0	0	0	0	0	0	0	0	19	126
orf19.1681-T-E1	orf19.1681-T	orf19.1681-T		0	10	10	233	0	0	110	0	0	0	0	0	10	0	0	0	0	0	0	0	10	123
orf19.1682-T-E1	orf19.1682-T	orf19.1682-T		0	4	4	268	0	0	107	0	0	0	0	0	4	0	0	0	0	0	0	0	4	161
orf19.1683-T-E1	orf19.1683-T	orf19.1683-T		0	8	4	247	0	0	97	0	0	0	0	0	4	0	0	0	0	0	0	0	8	150
orf19.1684-T-E1	orf19.1684-T	orf19.1684-T		1	22	18	229	0	0	127	0	0	3	0	0	15	0	0	1	0	1	0	1	21	102
orf19.1685-T-E1	orf19.1685-T	orf19.1685-T		6	8	14	217	1	0	144	6	0	0	0	0	13	0	0	0	0	0	0	0	8	73
orf19.1686-T-E1	orf19.1686-T	orf19.1686-T		0	6	14	275	0	0	153	0	1	0	0	0	13	0	0	0	0	0	0	0	6	122
orf19.1687-T-E1	orf19.1687-T	orf19.1687-T		0	26	4	299	0	0	107	0	0	0	0	0	4	0	0	0	0	0	0	0	26	192
orf19.169-T-E1	orf19.169-T	orf19.169-T		0	40	22	321	0	1	142	0	0	0	0	0	21	0	0	0	0	0	0	0	40	179
orf19.1690-T-E1	orf19.1690-T	orf19.1690-T		3	26	21	334	2	0	170	2	1	1	0	0	17	0	0	0	0	1	0	0	26	164
orf19.1691-T-E1	orf19.1691-T	orf19.1691-T		0	2	1	347	0	0	179	0	0	0	0	0	1	0	0	0	0	0	0	0	2	168
orf19.1693-T-E1	orf19.1693-T	orf19.1693-T		1	115	44	242	1	0	72	0	1	6	0	0	36	0	0	0	0	1	0	0	115	170
orf19.1697-T-E1	orf19.1697-T	orf19.1697-T		0	6	1	183	0	0	90	0	0	0	0	0	1	0	0	0	0	0	0	0	6	93
orf19.1698-T-E1	orf19.1698-T	orf19.1698-T		0	16	10	183	0	0	76	0	0	0	0	0	10	0	0	0	0	0	0	0	16	107
orf19.1699-T-E1	orf19.1699-T	orf19.1699-T		0	21	8	208	0	0	131	0	0	0	0	0	8	0	0	0	0	0	0	0	21	77
orf19.17-T-E1	orf19.17-T	orf19.17-T		3	8	8	382	0	0	177	3	0	2	0	0	6	0	0	0	0	0	0	0	8	205
orf19.1700-T-E1	orf19.1700-T	orf19.1700-T		0	6	0	227	0	0	89	0	0	0	0	0	0	0	0	1	0	0	0	1	5	138
orf19.1701-T-E1	orf19.1701-T	orf19.1701-T		0	2	0	237	0	0	133	0	0	0	0	0	0	0	0	0	0	0	0	0	2	104
orf19.1702-T-E1	orf19.1702-T	orf19.1702-T		0	3	1	241	0	0	110	0	0	0	0	4	1	0	0	0	0	0	0	0	3	127
orf19.1704-T-E1	orf19.1704-T	orf19.1704-T		1	5	2	278	1	0	141	1	0	0	0	0	1	0	0	0	1	0	0	0	5	137
orf19.1706-T-E1	orf19.1706-T	orf19.1706-T		5	31	49	267	4	0	143	3	2	5	0	0	39	0	0	4	0	0	3	1	30	124
orf19.1707-T-E1	orf19.1707-T	orf19.1707-T		7	2	6	257	1	1	133	4	1	2	0	0	3	0	0	0	6	0	0	0	2	124
orf19.1708-T-E1	orf19.1708-T	orf19.1708-T		0	5	4	258	0	0	125	0	0	1	0	0	3	0	0	0	0	0	0	0	5	133
orf19.1709-T-E1	orf19.1709-T	orf19.1709-T		0	0	0	294	0	0	144	0	0	0	0	0	0	0	0	0	0	0	0	0	0	150
orf19.171-T-E1	orf19.171-T	orf19.171-T		0	15	5	378	2	2	165	0	0	0	0	37	1	0	0	0	0	0	0	0	15	176
orf19.1710-T-E1	orf19.1710-T	orf19.1710-T		0	6	6	278	0	0	122	0	0	0	0	0	6	0	0	0	0	0	0	0	6	156
orf19.1711-T-E1	orf19.1711-T	orf19.1711-T		2	5	8	265	0	0	133	2	0	0	0	0	8	0	0	0	0	0	0	0	5	132
orf19.1712-T-E1	orf19.1712-T	orf19.1712-T		2	27	24	285	2	1	147	2	0	2	0	0	19	0	0	0	0	0	0	0	27	138
orf19.1714-T-E1	orf19.1714-T	orf19.1714-T		0	11	17	233	0	0	126	0	0	0	0	0	17	0	0	0	0	0	0	0	11	107
orf19.1715-T-E1	orf19.1715-T	orf19.1715-T		0	16	16	264	0	0	116	0	0	0	0	0	16	0	0	0	0	0	0	0	16	148
orf19.1716-T-E1	orf19.1716-T	orf19.1716-T		0	14	4	235	0	0	101	0	0	0	0	0	4	0	0	0	0	0	0	0	14	134
orf19.1717-T-E1	orf19.1717-T	orf19.1717-T		1	13	14	263	1	0	139	1	0	0	0	0	13	0	0	0	0	0	0	0	13	124
orf19.1718-T-E1	orf19.1718-T	orf19.1718-T		0	22	25	308	3	2	119	0	0	0	0	0	20	0	0	0	0	0	0	0	22	189
orf19.1719-T-E1	orf19.1719-T	orf19.1719-T		0	24	34	238	1	1	79	0	0	3	0	0	29	0	0	0	0	0	0	0	24	159
orf19.172-T-E1	orf19.172-T	orf19.172-T		0	3	3	355	0	1	180	0	0	0	0	0	2	0	0	0	0	0	0	0	3	175
orf19.1720-T-E1	orf19.1720-T	orf19.1720-T		1	22	16	324	0	0	184	0	0	0	0	0	16	0	0	0	0	1	0	0	22	140
orf19.1721-T-E1	orf19.1721-T	orf19.1721-T		0	4	3	249	0	0	149	0	0	0	0	0	3	0	0	0	0	0	0	0	4	100
orf19.1722-T-E1	orf19.1722-T	orf19.1722-T		2	0	6	229	1	2	88	2	0	0	0	0	3	0	0	0	0	0	0	0	0	141
orf19.1723-T-E1	orf19.1723-T	orf19.1723-T		0	12	2	232	0	0	82	0	0	0	0	0	2	0	0	0	0	0	0	0	12	150
orf19.1724-T-E1	orf19.1724-T	orf19.1724-T		5	7	11	230	0	0	86	4	0	0	0	0	11	0	0	0	0	1	0	0	7	144
orf19.1725-T-E1	orf19.1725-T	orf19.1725-T		0	22	18	259	0	1	110	0	3	1	0	0	13	0	0	0	0	0	0	0	22	149
orf19.1727-T-E1	orf19.1727-T	orf19.1727-T		0	39	20	340	0	0	134	0	0	0	0	0	20	0	0	0	0	0	0	0	39	206
orf19.1728-T-E1	orf19.1728-T	orf19.1728-T		0	3	3	332	0	0	117	0	0	0	0	0	3	0	0	0	0	0	0	0	3	215
orf19.1729-T-E1	orf19.1729-T	orf19.1729-T		0	11	4	326	1	0	210	0	0	0	0	0	3	0	0	0	0	0	0	0	11	116
orf19.173-T-E1	orf19.173-T	orf19.173-T		0	44	57	393	9	12	162	0	1	0	0	0	35	0	0	0	0	0	0	0	44	231
orf19.1730-T-E2	orf19.1730-T	orf19.1730-T		1	8	9	304	1	0	97	0	0	3	0	5	5	0	0	2	0	1	0	0	6	204
orf19.1734-T-E1	orf19.1734-T	orf19.1734-T		0	49	26	283	1	1	174	0	2	0	0	0	22	0	0	0	0	0	0	0	49	109
orf19.1735-T-E1	orf19.1735-T	orf19.1735-T		6	4	8	262	0	3	121	6	1	0	0	0	4	0	0	0	0	0	0	0	4	141
orf19.1736-T-E1	orf19.1736-T	orf19.1736-T		0	1	3	278	0	0	121	0	0	0	0	0	3	0	0	0	0	0	0	0	1	157
orf19.1737-T-E1	orf19.1737-T	orf19.1737-T		2	1	10	293	0	0	129	1	0	0	0	0	10	0	0	0	0	1	0	0	1	164
orf19.1738-T-E2	orf19.1738-T	orf19.1738-T		0	8	1	372	0	0	184	0	0	0	0	9	1	0	0	1	0	0	0	0	7	180
orf19.1738.1-T-E1	orf19.1738.1-T	orf19.1738.1-T		0	2	0	347	0	0	154	0	0	0	0	0	0	0	0	0	0	0	0	0	2	193
orf19.1741-T-E1	orf19.1741-T	orf19.1741-T		2	31	7	334	0	0	139	2	0	0	0	0	7	0	0	0	0	0	0	0	31	195
orf19.1742-T-E1	orf19.1742-T	orf19.1742-T		0	4	1	577	0	0	141	0	0	0	0	0	1	0	0	0	0	0	0	0	4	436
orf19.1743-T-E1	orf19.1743-T	orf19.1743-T		0	27	2	341	0	0	205	0	0	0	0	0	2	0	0	0	0	0	0	0	27	136
orf19.1744-T-E1	orf19.1744-T	orf19.1744-T		0	21	7	344	0	0	146	0	0	0	0	0	7	0	0	0	0	0	0	0	21	198
orf19.1745-T-E1	orf19.1745-T	orf19.1745-T		4	7	9	330	0	0	167	1	0	0	0	0	9	0	0	1	0	2	1	0	7	163
orf19.1746-T-E1	orf19.1746-T	orf19.1746-T		0	24	4	355	0	0	178	0	0	0	0	0	4	0	0	0	0	0	0	0	24	177
orf19.1747-T-E1	orf19.1747-T	orf19.1747-T		2	44	13	364	0	0	161	2	0	0	0	0	13	0	0	0	0	0	0	0	44	203
orf19.1748-T-E1	orf19.1748-T	orf19.1748-T		0	33	32	302	0	0	127	0	5	1	0	0	26	0	0	0	0	0	0	0	33	175
orf19.175-T-E1	orf19.175-T	orf19.175-T		5	30	41	422	1	0	194	4	0	1	0	0	39	0	0	0	0	1	0	0	30	228
orf19.1750-T-E1	orf19.1750-T	orf19.1750-T		0	6	1	316	0	0	171	0	0	0	0	22	1	0	0	0	0	0	0	0	6	123
orf19.1751-T-E1	orf19.1751-T	orf19.1751-T		0	24	20	259	2	2	114	0	5	5	0	0	6	0	0	0	0	0	0	0	24	145
orf19.1753-T-E1	orf19.1753-T	orf19.1753-T		0	14	20	269	1	1	134	0	1	1	0	0	16	0	0	0	0	0	0	0	14	135
orf19.1754-T-E1	orf19.1754-T	orf19.1754-T		0	19	10	230	0	0	120	0	0	0	0	0	10	0	0	0	0	0	0	0	19	110
orf19.1755-T-E1	orf19.1755-T	orf19.1755-T		0	30	32	249	1	1	133	0	1	2	0	0	27	0	0	0	0	0	0	0	30	116
orf19.1756-T-E1	orf19.1756-T	orf19.1756-T		0	13	1	291	0	0	131	0	0	0	0	0	1	0	0	0	0	0	0	0	13	160
orf19.1757-T-E1	orf19.1757-T	orf19.1757-T		0	19	31	341	2	5	134	0	2	0	0	0	22	0	0	0	0	0	0	0	19	207
orf19.1759-T-E1	orf19.1759-T	orf19.1759-T		0	15	12	378	1	3	158	0	0	0	0	0	8	0	0	0	0	0	0	0	15	220
orf19.176-T-E1	orf19.176-T	orf19.176-T		0	51	9	404	0	0	235	0	0	0	0	0	9	0	0	0	0	0	0	0	51	169
orf19.1760-T-E1	orf19.1760-T	orf19.1760-T		0	5	5	378	1	0	181	0	1	1	0	0	2	0	0	0	0	0	0	0	5	197
orf19.1761-T-E1	orf19.1761-T	orf19.1761-T		0	5	5	337	0	0	167	0	0	1	0	0	4	0	0	0	0	0	0	0	5	170
orf19.1762-T-E1	orf19.1762-T	orf19.1762-T		0	7	6	314	1	0	178	0	0	0	0	0	5	0	0	0	0	0	0	0	7	136
orf19.1763-T-E1	orf19.1763-T	orf19.1763-T		2	8	18	337	0	0	150	1	0	0	0	0	18	0	0	0	0	1	0	0	8	187
orf19.1764-T-E1	orf19.1764-T	orf19.1764-T		1	8	5	473	1	0	299	0	0	1	0	0	3	0	0	0	0	1	0	0	8	174
orf19.1765-T-E1	orf19.1765-T	orf19.1765-T		5	17	25	469	0	0	173	4	0	0	0	0	25	0	0	1	0	1	0	1	16	296
orf19.1766-T-E1	orf19.1766-T	orf19.1766-T		0	4	24	536	1	3	286	0	1	1	0	0	18	0	0	0	0	0	0	0	4	250
orf19.1767-T-E1	orf19.1767-T	orf19.1767-T		2	9	37	508	12	9	319	2	5	2	0	0	9	0	0	0	0	0	0	0	9	189
orf19.1768-T-E1	orf19.1768-T	orf19.1768-T		3	20	63	423	8	13	241	3	1	8	0	0	33	0	0	0	0	1	0	0	20	182
orf19.1769-T-E1	orf19.1769-T	orf19.1769-T		2	2	8	380	3	0	198	2	0	0	0	0	5	0	0	0	0	0	0	0	2	182
orf19.177-T-E1	orf19.177-T	orf19.177-T		0	16	31	452	7	2	218	0	3	2	0	0	17	0	0	0	0	0	0	0	16	234
orf19.1770-T-E1	orf19.1770-T	orf19.1770-T		0	1	0	331	0	0	165	0	0	0	0	0	0	0	0	0	0	0	0	0	1	166
orf19.1771-T-E1	orf19.1771-T	orf19.1771-T		2	15	27	334	6	5	194	2	3	2	0	0	11	0	0	0	0	0	0	0	15	140
orf19.1772-T-E1	orf19.1772-T	orf19.1772-T		4	18	62	365	8	3	188	4	7	12	0	0	32	0	0	1	0	0	0	1	17	177
orf19.1773-T-E1	orf19.1773-T	orf19.1773-T		3	7	10	335	0	3	142	3	0	1	0	0	6	0	0	0	0	0	0	0	7	193
orf19.1774-T-E1	orf19.1774-T	orf19.1774-T		9	20	24	264	0	0	147	7	0	0	0	0	24	0	0	0	1	2	0	0	20	117
orf19.1776-T-E1	orf19.1776-T	orf19.1776-T		3	10	7	261	0	0	66	3	1	0	0	0	6	0	0	0	0	0	0	0	10	195
orf19.1777-T-E1	orf19.1777-T	orf19.1777-T		0	22	23	378	3	2	201	0	0	0	0	0	18	0	0	0	0	0	0	0	22	177
orf19.1778-T-E1	orf19.1778-T	orf19.1778-T		6	1	5	284	0	0	86	6	1	0	0	0	4	0	0	0	0	1	0	0	1	198
orf19.1779-T-E1	orf19.1779-T	orf19.1779-T		1	22	24	333	0	0	201	0	0	0	0	0	24	0	0	0	0	1	0	0	22	132
orf19.178-T-E1	orf19.178-T	orf19.178-T		0	13	13	305	1	0	162	0	2	2	0	0	8	0	0	0	0	0	0	0	13	143
orf19.1780-T-E1	orf19.1780-T	orf19.1780-T		4	18	31	317	1	0	124	3	0	1	0	0	29	0	0	0	1	1	0	0	18	193
orf19.1782-T-E1	orf19.1782-T	orf19.1782-T		0	15	11	302	0	0	90	0	0	0	0	0	11	0	0	0	0	0	0	0	15	212
orf19.1782.1-T-E2	orf19.1782.1-T	orf19.1782.1-T		0	2	9	298	0	0	72	0	1	0	0	1	8	0	0	0	0	0	0	0	2	225
orf19.1783-T-E1	orf19.1783-T	orf19.1783-T		2	23	19	373	1	0	198	2	1	1	0	0	16	0	0	0	0	0	0	0	23	175
orf19.1785-T-E1	orf19.1785-T	orf19.1785-T		2	10	16	277	4	1	78	2	2	3	0	0	6	0	0	0	0	0	0	0	10	199
orf19.1789-T-E1	orf19.1789-T	orf19.1789-T		1	9	13	245	0	3	147	0	0	1	0	0	9	0	0	1	0	0	1	0	9	98
orf19.1789.1-T-E1	orf19.1789.1-T	orf19.1789.1-T		3	4	7	288	1	0	155	3	0	1	0	0	5	0	0	0	0	0	0	0	4	133
orf19.1791-T-E1	orf19.1791-T	orf19.1791-T		0	6	20	344	4	0	127	0	1	2	0	0	13	0	0	0	0	0	0	0	6	217
orf19.1792-T-E1	orf19.1792-T	orf19.1792-T		10	19	39	343	1	4	220	9	7	7	0	0	20	0	0	0	0	1	0	0	19	123
orf19.1793-T-E1	orf19.1793-T	orf19.1793-T		2	17	27	355	4	7	159	2	2	2	0	0	12	0	0	0	0	0	0	0	17	196
orf19.1794-T-E1	orf19.1794-T	orf19.1794-T		0	10	20	382	2	0	219	0	0	1	0	0	17	0	0	0	0	0	0	0	10	163
orf19.1795-T-E1	orf19.1795-T	orf19.1795-T		10	31	30	393	6	4	209	8	3	1	0	0	16	0	0	0	0	2	0	0	31	184
orf19.1795.1-T-E1	orf19.1795.1-T	orf19.1795.1-T		0	2	6	372	0	0	151	0	0	0	0	0	6	0	0	0	0	0	0	0	2	221
orf19.1796-T-E1	orf19.1796-T	orf19.1796-T		1	15	5	409	0	0	244	1	0	0	0	0	5	0	0	1	0	0	0	0	15	165
orf19.1797-T-E1	orf19.1797-T	orf19.1797-T		2	11	26	394	6	2	157	2	0	3	0	0	15	0	0	0	0	0	0	0	11	237
orf19.1798-T-E1	orf19.1798-T	orf19.1798-T		4	78	92	412	1	0	221	4	7	5	0	0	79	0	0	0	0	0	0	0	78	191
orf19.1799-T-E1	orf19.1799-T	orf19.1799-T		0	43	15	429	0	0	211	0	0	0	0	0	15	0	0	0	0	0	0	0	43	218
orf19.18-T-E2	orf19.18-T	orf19.18-T		0	31	4	386	0	0	188	0	0	0	0	17	4	0	0	0	0	0	0	0	31	181
orf19.1800-T-E1	orf19.1800-T	orf19.1800-T		3	27	9	395	0	0	178	2	0	0	0	0	9	0	0	0	1	0	0	0	27	217
orf19.1801-T-E1	orf19.1801-T	orf19.1801-T		0	3	2	498	0	0	193	0	0	0	0	0	2	0	0	0	0	0	0	0	3	305
orf19.1802-T-E1	orf19.1802-T	orf19.1802-T		4	48	21	722	4	0	199	4	1	0	0	0	16	0	0	0	0	0	0	0	48	523
orf19.1803-T-E1	orf19.1803-T	orf19.1803-T		0	4	14	471	0	6	274	0	0	3	0	0	5	0	0	0	0	0	0	0	4	197
orf19.1804-T-E1	orf19.1804-T	orf19.1804-T		5	14	11	477	1	5	281	5	0	0	0	0	5	0	0	0	0	1	0	0	14	196
orf19.1805-T-E1	orf19.1805-T	orf19.1805-T		17	11	44	444	3	4	227	15	5	8	0	0	25	0	0	0	0	2	0	0	11	217
orf19.1806-T-E1	orf19.1806-T	orf19.1806-T		2	14	18	440	1	3	175	2	2	1	0	0	11	0	0	0	0	0	0	0	14	265
orf19.1808-T-E1	orf19.1808-T	orf19.1808-T		0	19	69	500	5	23	217	0	3	6	0	0	32	0	0	0	0	0	0	0	19	283
orf19.1813-T-E1	orf19.1813-T	orf19.1813-T		0	41	10	283	0	0	146	0	0	0	0	0	10	0	0	0	0	0	0	0	41	137
orf19.1814-T-E1	orf19.1814-T	orf19.1814-T		0	81	17	282	1	0	156	0	0	0	0	0	16	0	0	0	0	0	0	0	81	126
orf19.1815-T-E1	orf19.1815-T	orf19.1815-T		0	7	0	246	0	0	102	0	0	0	0	0	0	0	0	0	0	0	0	0	7	144
orf19.1816-T-E1	orf19.1816-T	orf19.1816-T		15	63	36	354	0	0	223	14	1	5	0	0	30	0	0	0	0	1	0	0	63	131
orf19.182-T-E1	orf19.182-T	orf19.182-T		0	12	23	310	2	0	162	0	2	0	0	0	19	0	0	0	0	0	0	0	12	148
orf19.1821-T-E1	orf19.1821-T	orf19.1821-T		4	3	7	304	0	0	157	1	0	0	0	0	7	0	0	0	0	3	0	0	3	147
orf19.1822-T-E1	orf19.1822-T	orf19.1822-T		0	17	37	384	4	1	191	0	2	6	0	0	24	0	0	0	0	0	0	0	17	193
orf19.1823-T-E1	orf19.1823-T	orf19.1823-T		0	58	15	375	0	0	182	0	0	0	0	0	15	0	0	0	0	0	0	0	58	193
orf19.1824-T-E1	orf19.1824-T	orf19.1824-T		1	12	18	399	0	1	172	1	0	0	0	0	17	0	0	0	0	0	0	0	12	227
orf19.1825-T-E1	orf19.1825-T	orf19.1825-T		1	24	29	423	0	0	192	0	0	0	0	0	29	0	0	0	0	1	0	0	24	231
orf19.1826-T-E1	orf19.1826-T	orf19.1826-T		0	38	22	422	0	0	210	0	0	1	0	0	21	0	0	0	0	0	0	0	38	212
orf19.1827-T-E1	orf19.1827-T	orf19.1827-T		2	27	35	402	0	0	142	2	0	0	0	0	35	0	0	0	0	0	0	0	27	260
orf19.1828-T-E1	orf19.1828-T	orf19.1828-T		1	14	12	405	0	0	251	0	0	0	0	0	12	0	0	0	0	1	0	0	14	154
orf19.183-T-E1	orf19.183-T	orf19.183-T		0	4	2	338	0	0	168	0	0	0	0	0	2	0	0	0	0	0	0	0	4	170
orf19.1830-T-E1	orf19.1830-T	orf19.1830-T		0	6	1	413	0	0	196	0	0	0	0	0	1	0	0	0	0	0	0	0	6	217
orf19.1831-T-E1	orf19.1831-T	orf19.1831-T		6	2	16	368	0	0	194	5	0	3	0	0	13	0	0	0	0	1	0	0	2	174
orf19.1832-T-E1	orf19.1832-T	orf19.1832-T		0	34	15	377	0	1	155	0	1	2	0	0	11	0	0	1	0	0	0	1	33	222
orf19.1833-T-E1	orf19.1833-T	orf19.1833-T		0	9	3	370	0	1	146	0	0	0	0	0	2	0	0	0	0	0	0	0	9	224
orf19.1834-T-E1	orf19.1834-T	orf19.1834-T		1	40	33	353	0	0	181	0	0	0	0	0	33	0	0	0	0	1	0	0	40	172
orf19.1835-T-E1	orf19.1835-T	orf19.1835-T		5	26	13	330	2	0	142	4	1	0	0	0	10	0	0	0	0	1	0	0	26	188
orf19.1836-T-E1	orf19.1836-T	orf19.1836-T		0	9	19	312	3	1	117	0	2	3	0	0	10	0	0	0	0	0	0	0	9	195
orf19.1837-T-E1	orf19.1837-T	orf19.1837-T		0	3	1	287	0	0	105	0	0	0	0	0	1	0	0	0	0	0	0	0	3	182
orf19.1839-T-E1	orf19.1839-T	orf19.1839-T		0	61	20	269	1	0	188	0	0	1	0	0	18	0	0	0	0	0	0	0	61	81
orf19.184-T-E1	orf19.184-T	orf19.184-T		0	7	3	359	0	0	197	0	1	0	0	0	2	0	0	0	0	0	0	0	7	162
orf19.1840-T-E2	orf19.1840-T	orf19.1840-T		0	31	6	212	0	0	91	0	0	0	0	0	6	0	0	0	0	0	0	0	31	121
orf19.1841-T-E1	orf19.1841-T	orf19.1841-T		2	13	16	316	1	0	177	1	0	0	0	0	15	0	0	0	0	2	0	0	13	139
orf19.1842-T-E1	orf19.1842-T	orf19.1842-T		0	63	55	362	17	0	163	0	1	0	0	0	37	0	0	0	0	0	0	0	63	199
orf19.1843-T-E1	orf19.1843-T	orf19.1843-T		0	25	21	371	2	0	195	0	0	2	0	0	17	0	0	0	0	0	0	0	25	176
orf19.1844-T-E1	orf19.1844-T	orf19.1844-T		1	29	20	312	0	0	101	0	0	0	0	0	20	0	0	1	0	1	0	1	28	211
orf19.1847-T-E1	orf19.1847-T	orf19.1847-T		0	20	7	297	0	0	119	0	0	0	0	0	7	0	0	0	0	0	0	0	20	178
orf19.1848.1-T-E2	orf19.1848.1-T	orf19.1848.1-T		0	1	0	229	0	0	108	0	0	0	0	6	0	0	0	0	0	0	0	0	1	115
orf19.1849-T-E1	orf19.1849-T	orf19.1849-T		0	24	19	247	3	0	117	0	0	0	0	0	16	0	0	0	0	0	0	0	24	130
orf19.185-T-E1	orf19.185-T	orf19.185-T		0	6	16	341	1	2	187	0	0	3	0	0	10	0	0	0	0	0	0	0	6	154
orf19.1850-T-E1	orf19.1850-T	orf19.1850-T		0	7	3	258	0	0	154	0	0	0	0	0	3	0	0	0	0	0	0	0	7	104
orf19.1852-T-E1	orf19.1852-T	orf19.1852-T		1	11	11	259	0	0	102	1	0	0	0	0	11	0	0	0	0	0	0	0	11	157
orf19.1853-T-E1	orf19.1853-T	orf19.1853-T		0	3	0	302	0	0	119	0	0	0	0	0	0	0	0	0	0	0	0	0	3	183
orf19.1854-T-E1	orf19.1854-T	orf19.1854-T		0	6	0	286	0	0	163	0	0	0	0	0	0	0	0	0	0	0	0	0	6	123
orf19.1855-T-E1	orf19.1855-T	orf19.1855-T		1	55	25	259	0	0	121	0	0	1	0	0	24	0	0	0	0	1	0	0	55	138
orf19.1856-T-E1	orf19.1856-T	orf19.1856-T		0	5	1	300	0	0	176	0	0	0	0	0	1	0	0	0	0	0	0	0	5	124
orf19.1857-T-E1	orf19.1857-T	orf19.1857-T		0	5	4	261	0	0	105	0	0	0	0	0	4	0	0	0	0	0	0	0	5	156
orf19.1860-T-E2	orf19.1860-T	orf19.1860-T		0	9	2	256	0	0	100	0	0	0	0	20	2	0	0	0	0	0	0	0	9	136
orf19.1860.1-T-E1	orf19.1860.1-T	orf19.1860.1-T		0	14	5	126	0	0	81	0	0	0	0	0	5	0	0	0	0	0	0	0	14	45
orf19.1861-T-E1	orf19.1861-T	orf19.1861-T		0	11	9	160	0	0	63	0	0	0	0	0	9	0	0	0	0	0	0	0	11	97
orf19.1862-T-E1	orf19.1862-T	orf19.1862-T		0	1	1	185	0	0	103	0	0	0	0	0	1	0	0	0	0	0	0	0	1	82
orf19.1863-T-E1	orf19.1863-T	orf19.1863-T		0	10	11	182	0	0	81	0	0	0	0	0	11	0	0	0	0	0	0	0	10	101
orf19.1864-T-E1	orf19.1864-T	orf19.1864-T		1	24	22	169	0	1	90	0	0	0	0	0	21	0	0	0	0	1	0	0	24	79
orf19.1865-T-E1	orf19.1865-T	orf19.1865-T		0	7	11	192	0	0	89	0	0	0	0	0	11	0	0	0	0	0	0	0	7	103
orf19.1866-T-E1	orf19.1866-T	orf19.1866-T		0	1	0	192	0	0	104	0	0	0	0	0	0	0	0	0	0	0	0	0	1	88
orf19.1867-T-E1	orf19.1867-T	orf19.1867-T		0	12	8	160	0	0	88	0	0	0	0	0	8	0	0	0	0	0	0	0	12	72
orf19.1868-T-E1	orf19.1868-T	orf19.1868-T		0	6	5	158	0	0	89	0	0	0	0	0	5	0	0	0	0	0	0	0	6	69
orf19.1871-T-E1	orf19.1871-T	orf19.1871-T		0	28	19	202	0	0	91	0	0	0	0	0	19	0	0	0	0	0	0	0	28	111
orf19.1872-T-E1	orf19.1872-T	orf19.1872-T		0	6	5	160	0	0	55	0	0	0	0	0	5	0	0	0	0	0	0	0	6	105
orf19.1873-T-E1	orf19.1873-T	orf19.1873-T		0	2	5	183	0	0	68	0	0	0	0	0	5	0	0	0	0	0	0	0	2	115
orf19.1874-T-E2	orf19.1874-T	orf19.1874-T		0	18	11	180	0	0	88	0	0	0	0	1	11	0	0	0	0	0	0	0	18	91
orf19.1876-T-E1	orf19.1876-T	orf19.1876-T		0	4	12	202	0	0	93	0	0	0	0	0	12	0	0	0	0	0	0	0	4	109
orf19.1877-T-E1	orf19.1877-T	orf19.1877-T		0	11	7	182	0	0	103	0	0	0	0	0	7	0	0	0	0	0	0	0	11	79
orf19.1878-T-E1	orf19.1878-T	orf19.1878-T		0	5	7	188	0	0	71	0	0	0	0	0	7	0	0	0	0	0	0	0	5	117
orf19.188-T-E1	orf19.188-T	orf19.188-T		4	24	70	279	5	3	136	4	2	1	0	0	59	0	0	0	0	0	0	0	24	143
orf19.1880-T-E1	orf19.1880-T	orf19.1880-T		0	6	2	180	0	0	98	0	0	0	0	0	2	0	0	0	0	0	0	0	6	82
orf19.1881-T-E1	orf19.1881-T	orf19.1881-T		1	10	4	174	0	0	92	1	0	0	0	0	4	0	0	0	0	0	0	0	10	82
orf19.1883-T-E1	orf19.1883-T	orf19.1883-T		0	31	19	204	0	0	72	0	0	0	0	0	19	0	0	0	0	0	0	0	31	132
orf19.1885-T-E1	orf19.1885-T	orf19.1885-T		0	8	9	209	0	0	74	0	1	1	0	0	7	0	0	0	0	0	0	0	8	135
orf19.1886-T-E1	orf19.1886-T	orf19.1886-T		0	21	7	220	0	0	121	0	0	0	0	0	7	0	0	0	0	0	0	0	21	99
orf19.1887-T-E1	orf19.1887-T	orf19.1887-T		2	19	12	249	0	0	122	0	0	0	0	0	12	0	0	0	0	2	0	0	19	127
orf19.1888-T-E1	orf19.1888-T	orf19.1888-T		0	11	12	249	0	0	114	0	0	0	0	0	12	0	0	0	0	0	0	0	11	135
orf19.1889-T-E1	orf19.1889-T	orf19.1889-T		0	10	3	253	0	0	130	0	0	0	0	0	3	0	0	0	0	0	0	0	10	123
orf19.1890-T-E1	orf19.1890-T	orf19.1890-T		0	13	13	227	0	0	116	0	0	0	0	0	13	0	0	0	0	0	0	0	13	111
orf19.1891-T-E1	orf19.1891-T	orf19.1891-T		0	13	5	195	0	0	73	0	0	0	0	0	5	0	0	0	0	0	0	0	13	122
orf19.1893-T-E1	orf19.1893-T	orf19.1893-T		4	13	18	202	2	0	86	2	1	1	0	0	14	0	0	0	1	1	0	0	13	116
orf19.1896-T-E1	orf19.1896-T	orf19.1896-T		0	13	3	189	0	0	83	0	0	0	0	0	3	0	0	0	0	0	0	0	13	106
orf19.1897-T-E1	orf19.1897-T	orf19.1897-T		1	7	9	164	3	1	65	0	0	0	0	0	5	0	0	0	0	1	0	0	7	99
orf19.190-T-E1	orf19.190-T	orf19.190-T		2	9	7	324	0	0	189	0	0	0	0	0	7	0	0	2	0	1	1	1	8	135
orf19.1900-T-E1	orf19.1900-T	orf19.1900-T		0	10	19	157	0	0	79	0	0	0	0	0	19	0	0	0	0	0	0	0	10	78
orf19.1901-T-E1	orf19.1901-T	orf19.1901-T		0	25	9	176	0	0	96	0	0	0	0	0	9	0	0	0	0	0	0	0	25	80
orf19.1902-T-E1	orf19.1902-T	orf19.1902-T		0	13	7	161	0	0	98	0	0	0	0	0	7	0	0	0	0	0	0	0	13	63
orf19.1906-T-E1	orf19.1906-T	orf19.1906-T		3	1	4	219	0	0	102	3	0	0	0	0	4	0	0	0	0	0	0	0	1	117
orf19.1907-T-E1	orf19.1907-T	orf19.1907-T		0	26	7	297	0	0	183	0	0	0	0	0	7	0	0	0	0	0	0	0	26	114
orf19.191-T-E1	orf19.191-T	orf19.191-T		1	27	25	345	0	0	186	0	1	8	0	0	16	0	0	0	0	1	0	0	27	159
orf19.1910-T-E1	orf19.1910-T	orf19.1910-T		0	6	2	305	0	0	116	0	0	0	0	0	2	0	0	0	0	0	0	0	6	189
orf19.1911-T-E1	orf19.1911-T	orf19.1911-T		0	25	3	285	0	0	162	0	0	0	0	0	3	0	0	0	0	0	0	0	25	123
orf19.1913-T-E1	orf19.1913-T	orf19.1913-T		0	9	10	282	0	0	122	0	0	0	0	0	10	0	0	0	0	0	0	0	9	160
orf19.1914-T-E1	orf19.1914-T	orf19.1914-T		13	18	25	245	1	2	120	12	0	6	0	0	16	0	0	0	0	2	0	0	18	125
orf19.1915-T-E1	orf19.1915-T	orf19.1915-T		4	29	23	330	3	0	171	4	0	1	0	0	19	0	0	0	0	0	0	0	29	159
orf19.1917-T-E1	orf19.1917-T	orf19.1917-T		0	12	4	470	0	0	300	0	0	0	0	0	4	0	0	0	0	0	0	0	12	170
orf19.192-T-E1	orf19.192-T	orf19.192-T		0	15	15	318	0	2	147	0	0	0	0	0	13	0	0	0	0	0	0	0	15	171
orf19.1920-T-E1	orf19.1920-T	orf19.1920-T		0	6	4	550	0	0	386	0	0	0	0	0	4	0	0	0	0	0	0	0	6	164
orf19.1923-T-E1	orf19.1923-T	orf19.1923-T		0	24	4	780	0	0	156	0	0	0	0	0	4	0	0	0	0	0	0	0	24	624
orf19.1925-T-E1	orf19.1925-T	orf19.1925-T		3	13	21	706	1	0	147	3	2	1	0	0	17	0	0	0	0	2	0	0	13	559
orf19.1926-T-E1	orf19.1926-T	orf19.1926-T		0	40	18	343	0	0	173	0	0	0	0	0	18	0	0	0	0	0	0	0	40	170
orf19.1927-T-E1	orf19.1927-T	orf19.1927-T		0	10	12	329	1	0	156	0	0	1	0	0	10	0	0	0	0	0	0	0	10	173
orf19.193-T-E1	orf19.193-T	orf19.193-T		0	12	14	304	0	1	164	0	0	0	0	0	13	0	0	0	0	0	0	0	12	140
orf19.1930-T-E1	orf19.1930-T	orf19.1930-T		0	26	19	342	0	0	183	0	0	0	0	0	19	0	0	0	0	0	0	0	26	159
orf19.1932-T-E1	orf19.1932-T	orf19.1932-T		0	35	17	372	0	0	155	0	0	0	0	0	17	0	0	0	0	0	0	0	35	217
orf19.1933-T-E1	orf19.1933-T	orf19.1933-T		0	30	20	342	0	0	212	0	0	0	0	0	20	0	0	0	0	0	0	0	30	130
orf19.1934-T-E1	orf19.1934-T	orf19.1934-T		0	23	18	330	1	0	212	0	0	0	0	0	17	0	0	0	0	0	0	0	23	118
orf19.1935-T-E1	orf19.1935-T	orf19.1935-T		5	5	5	293	2	0	182	4	0	0	0	0	3	0	0	0	0	1	0	0	5	111
orf19.1936-T-E1	orf19.1936-T	orf19.1936-T		0	18	7	309	1	0	160	0	0	0	0	0	6	0	0	0	0	0	0	0	18	149
orf19.1938-T-E1	orf19.1938-T	orf19.1938-T		0	7	11	267	0	0	130	0	0	1	0	0	10	0	0	0	0	0	0	0	7	137
orf19.1939-T-E1	orf19.1939-T	orf19.1939-T		0	16	13	273	0	0	153	0	0	0	0	0	13	0	0	0	0	0	0	0	16	120
orf19.194-T-E1	orf19.194-T	orf19.194-T		0	9	20	339	0	2	155	0	1	0	0	0	17	0	0	0	0	0	0	0	9	184
orf19.1940-T-E1	orf19.1940-T	orf19.1940-T		0	13	9	277	0	0	155	0	0	0	0	0	9	0	0	0	0	0	0	0	13	122
orf19.1941-T-E1	orf19.1941-T	orf19.1941-T		0	26	5	317	0	0	175	0	0	0	0	0	5	0	0	0	0	0	0	0	26	142
orf19.1942-T-E1	orf19.1942-T	orf19.1942-T		0	27	20	328	0	0	142	0	0	0	0	0	20	0	0	0	0	0	0	0	27	186
orf19.1943-T-E1	orf19.1943-T	orf19.1943-T		1	41	50	316	0	0	153	0	1	0	0	0	49	0	0	0	0	1	0	0	41	163
orf19.1944-T-E1	orf19.1944-T	orf19.1944-T		0	38	22	366	0	4	179	0	0	1	0	0	17	0	0	0	0	0	0	0	38	187
orf19.1945-T-E1	orf19.1945-T	orf19.1945-T		0	29	10	307	0	0	168	0	0	0	0	0	10	0	0	0	0	0	0	0	29	139
orf19.1946-T-E1	orf19.1946-T	orf19.1946-T		0	15	1	299	0	0	107	0	0	0	0	0	1	0	0	0	0	0	0	0	15	192
orf19.1948-T-E1	orf19.1948-T	orf19.1948-T		0	12	7	286	0	0	169	0	0	0	0	0	7	0	0	0	0	0	0	0	12	117
orf19.1949-T-E1	orf19.1949-T	orf19.1949-T		0	29	1	286	0	0	145	0	0	0	0	0	1	0	0	0	0	0	0	0	29	141
orf19.1950-T-E1	orf19.1950-T	orf19.1950-T		0	7	4	249	0	0	105	0	0	0	0	0	4	0	0	0	0	0	0	0	7	144
orf19.1953-T-E1	orf19.1953-T	orf19.1953-T		0	16	9	241	0	0	109	0	0	0	0	0	9	0	0	0	0	0	0	0	16	132
orf19.1954-T-E1	orf19.1954-T	orf19.1954-T		0	16	14	234	0	0	116	0	0	0	0	0	14	0	0	0	0	0	0	0	16	118
orf19.1955-T-E1	orf19.1955-T	orf19.1955-T		0	8	10	261	0	0	118	0	0	0	0	7	10	0	0	1	0	0	0	0	7	137
orf19.1956-T-E1	orf19.1956-T	orf19.1956-T		0	24	12	336	0	0	188	0	0	0	0	0	12	0	0	0	0	0	0	0	24	148
orf19.1957-T-E1	orf19.1957-T	orf19.1957-T		0	9	4	323	0	0	129	0	0	0	0	0	4	0	0	0	0	0	0	0	9	194
orf19.1958-T-E1	orf19.1958-T	orf19.1958-T		8	9	14	335	0	1	160	7	0	0	0	0	13	0	0	0	0	1	0	0	9	175
orf19.1959-T-E1	orf19.1959-T	orf19.1959-T		0	13	7	367	0	0	182	0	0	0	0	0	7	0	0	0	0	0	0	0	13	185
orf19.1960-T-E1	orf19.1960-T	orf19.1960-T		0	19	6	384	0	0	229	0	0	0	0	0	6	0	0	0	0	0	0	0	19	155
orf19.1961-T-E1	orf19.1961-T	orf19.1961-T		2	32	32	371	0	2	179	2	2	0	0	0	28	0	0	0	0	0	0	0	32	192
orf19.1963-T-E1	orf19.1963-T	orf19.1963-T		3	17	15	328	3	1	129	3	2	0	0	0	9	0	0	0	0	0	0	0	17	199
orf19.1964-T-E1	orf19.1964-T	orf19.1964-T		0	10	3	326	0	0	162	0	0	0	0	0	3	0	0	0	0	0	0	0	10	164
orf19.1966-T-E1	orf19.1966-T	orf19.1966-T		0	7	1	317	0	0	190	0	0	0	0	0	1	0	0	1	0	0	0	1	6	127
orf19.1967-T-E2	orf19.1967-T	orf19.1967-T		0	4	3	317	0	0	182	0	0	0	0	7	3	0	0	2	0	0	0	0	2	130
orf19.1968-T-E1	orf19.1968-T	orf19.1968-T		0	2	3	307	0	0	120	0	0	0	0	0	3	0	0	0	0	0	0	0	2	187
orf19.1968.1-T-E1	orf19.1968.1-T	orf19.1968.1-T		0	8	8	280	0	0	172	0	0	0	0	0	8	0	0	0	0	0	0	0	8	108
orf19.1969-T-E1	orf19.1969-T	orf19.1969-T		0	10	5	288	0	0	114	0	0	0	0	0	5	0	0	0	0	0	0	0	10	174
orf19.1970-T-E1	orf19.1970-T	orf19.1970-T		0	4	2	311	0	1	149	0	0	0	0	0	1	0	0	0	0	0	0	0	4	162
orf19.1971-T-E1	orf19.1971-T	orf19.1971-T		0	21	14	297	0	0	185	0	0	0	0	0	14	0	0	0	0	0	0	0	21	112
orf19.1972-T-E1	orf19.1972-T	orf19.1972-T		0	10	5	295	0	0	119	0	0	0	0	0	5	0	0	0	0	0	0	0	10	176
orf19.1973-T-E1	orf19.1973-T	orf19.1973-T		0	10	6	272	0	0	126	0	0	0	0	0	6	0	0	0	0	0	0	0	10	146
orf19.1974-T-E1	orf19.1974-T	orf19.1974-T		0	7	0	279	0	0	158	0	0	0	0	0	0	0	0	0	0	0	0	0	7	121
orf19.1975-T-E1	orf19.1975-T	orf19.1975-T		0	2	2	269	0	0	105	0	0	0	0	0	2	0	0	0	0	0	0	0	2	164
orf19.1976-T-E1	orf19.1976-T	orf19.1976-T		0	6	2	246	0	0	151	0	0	0	0	0	2	0	0	1	0	0	0	1	5	95
orf19.1977-T-E1	orf19.1977-T	orf19.1977-T		0	13	10	265	0	0	154	0	0	0	0	0	10	0	0	0	0	0	0	0	13	111
orf19.1978-T-E1	orf19.1978-T	orf19.1978-T		0	19	5	291	0	0	133	0	0	0	0	0	5	0	0	0	0	0	0	0	19	158
orf19.1979-T-E1	orf19.1979-T	orf19.1979-T		0	18	1	258	0	0	123	0	0	0	0	0	1	0	0	0	0	0	0	0	18	135
orf19.198-T-E1	orf19.198-T	orf19.198-T		0	32	5	275	0	0	157	0	0	0	0	0	5	0	0	0	0	0	0	0	32	118
orf19.1980-T-E1	orf19.1980-T	orf19.1980-T		0	17	7	229	0	0	101	0	0	0	0	0	7	0	0	0	0	0	0	0	17	128
orf19.1981-T-E1	orf19.1981-T	orf19.1981-T		0	6	2	211	0	0	116	0	0	0	0	0	2	0	0	0	0	0	0	0	6	95
orf19.1985-T-E1	orf19.1985-T	orf19.1985-T		0	19	7	324	0	0	168	0	0	0	0	0	7	0	0	0	0	0	0	0	19	156
orf19.1986-T-E1	orf19.1986-T	orf19.1986-T		1	20	7	299	0	0	154	1	0	0	0	0	7	0	0	0	0	0	0	0	20	145
orf19.1988-T-E1	orf19.1988-T	orf19.1988-T		0	17	10	333	0	0	145	0	0	0	0	0	10	0	0	0	0	0	0	0	17	188
orf19.1989-T-E1	orf19.1989-T	orf19.1989-T		0	8	2	281	0	0	121	0	0	0	0	0	2	0	0	0	0	0	0	0	8	160
orf19.199-T-E1	orf19.199-T	orf19.199-T		0	29	14	245	0	0	117	0	0	0	0	0	14	0	0	0	0	0	0	0	29	128
orf19.1990-T-E1	orf19.1990-T	orf19.1990-T		0	6	23	261	1	0	139	0	8	2	0	0	12	0	0	0	0	0	0	0	6	122
orf19.1991-T-E1	orf19.1991-T	orf19.1991-T		0	14	5	273	0	1	128	0	0	0	0	0	4	0	0	1	0	0	0	1	13	145
orf19.1992-T-E1	orf19.1992-T	orf19.1992-T		0	14	16	278	2	2	147	0	3	2	0	0	7	0	0	0	0	0	0	0	14	131
orf19.1993-T-E1	orf19.1993-T	orf19.1993-T		0	3	6	297	1	0	147	0	0	0	0	0	5	0	0	0	0	0	0	0	3	150
orf19.1994-T-E1	orf19.1994-T	orf19.1994-T		2	14	30	279	6	9	145	2	0	0	0	0	15	0	0	0	0	0	0	0	14	134
orf19.1995-T-E1	orf19.1995-T	orf19.1995-T		0	20	5	318	0	0	169	0	0	0	0	0	5	0	0	0	0	0	0	0	20	149
orf19.1996-T-E1	orf19.1996-T	orf19.1996-T		0	6	8	254	1	0	153	0	0	0	0	0	7	0	0	0	0	0	0	0	6	101
orf19.1998-T-E1	orf19.1998-T	orf19.1998-T		0	16	19	253	0	0	168	0	0	0	0	0	19	0	0	0	0	0	0	0	16	85
orf19.1999-T-E1	orf19.1999-T	orf19.1999-T		3	0	0	208	0	0	121	3	0	0	0	0	0	0	0	0	0	1	0	0	0	87
orf19.20-T-E1	orf19.20-T	orf19.20-T		0	27	10	417	0	1	239	0	0	0	0	0	9	0	0	0	0	0	0	0	27	178
orf19.200-T-E1	orf19.200-T	orf19.200-T		0	11	17	247	1	0	151	0	3	2	0	0	11	0	0	0	0	0	0	0	11	96
orf19.2000-T-E1	orf19.2000-T	orf19.2000-T		2	16	24	201	0	0	105	2	1	1	0	0	22	0	0	0	0	0	0	0	16	96
orf19.2001-T-E1	orf19.2001-T	orf19.2001-T		0	6	7	220	0	0	88	0	0	0	1	0	7	0	0	0	0	0	0	0	5	132
orf19.2002-T-E1	orf19.2002-T	orf19.2002-T		2	30	19	242	0	0	91	2	0	0	0	0	19	0	0	0	0	0	0	0	30	151
orf19.2003-T-E1	orf19.2003-T	orf19.2003-T		0	10	3	289	0	0	157	0	0	0	0	0	3	0	0	0	0	0	0	0	10	132
orf19.2005-T-E1	orf19.2005-T	orf19.2005-T		3	36	37	298	4	3	146	3	0	3	0	0	27	0	0	0	0	0	0	0	36	152
orf19.2006-T-E1	orf19.2006-T	orf19.2006-T		0	10	11	278	0	0	127	0	0	1	0	0	10	0	0	0	0	0	0	0	10	151
orf19.2006.1-T-E1	orf19.2006.1-T	orf19.2006.1-T		0	3	0	274	0	0	146	0	0	0	0	0	0	0	0	0	0	0	0	0	3	128
orf19.2007-T-E1	orf19.2007-T	orf19.2007-T		2	43	20	327	0	0	164	1	2	1	0	0	17	0	0	2	0	1	1	0	43	163
orf19.2008-T-E1	orf19.2008-T	orf19.2008-T		0	17	10	288	0	0	130	0	1	0	0	0	9	0	0	0	0	0	0	0	17	158
orf19.2009-T-E1	orf19.2009-T	orf19.2009-T		2	23	13	277	0	0	133	2	0	0	0	0	13	0	0	0	0	1	0	0	23	144
orf19.201-T-E1	orf19.201-T	orf19.201-T		0	1	4	254	0	0	161	0	0	0	0	2	4	0	0	0	0	0	0	0	1	91
orf19.2010-T-E1	orf19.2010-T	orf19.2010-T		0	10	12	248	0	0	96	0	0	0	0	0	12	0	0	0	0	0	0	0	10	152
orf19.2012-T-E1	orf19.2012-T	orf19.2012-T		0	24	14	298	0	0	170	0	0	0	0	4	14	0	0	1	0	0	0	1	23	124
orf19.2013-T-E1	orf19.2013-T	orf19.2013-T		0	16	4	323	0	0	159	0	0	0	0	0	4	0	0	0	0	0	0	0	16	164
orf19.2014-T-E1	orf19.2014-T	orf19.2014-T		2	16	3	258	0	0	132	0	0	1	0	0	2	0	0	0	0	2	0	0	16	126
orf19.2016-T-E1	orf19.2016-T	orf19.2016-T		1	2	0	263	0	0	127	0	0	0	0	0	0	0	0	1	0	0	1	0	2	136
orf19.2017-T-E1	orf19.2017-T	orf19.2017-T		0	9	6	261	0	0	163	0	0	0	0	0	6	0	0	0	0	0	0	0	9	98
orf19.2018-T-E1	orf19.2018-T	orf19.2018-T		0	5	4	210	0	0	88	0	0	0	0	0	4	0	0	0	0	0	0	0	5	122
orf19.2018.1-T-E1	orf19.2018.1-T	orf19.2018.1-T		1	4	2	214	0	0	129	0	0	0	0	1	2	0	0	0	0	1	0	0	4	84
orf19.2018.2-T-E1	orf19.2018.2-T	orf19.2018.2-T		0	0	2	223	0	0	127	0	0	0	0	0	2	0	0	0	0	0	0	0	0	96
orf19.2019-T-E1	orf19.2019-T	orf19.2019-T		0	7	3	252	0	0	134	0	0	0	0	0	3	0	0	0	0	0	0	0	7	118
orf19.202-T-E1	orf19.202-T	orf19.202-T		0	23	6	264	0	0	159	0	0	0	0	0	6	0	0	0	0	0	0	0	23	105
orf19.2020-T-E1	orf19.2020-T	orf19.2020-T		2	22	6	247	0	0	119	2	0	0	0	0	6	0	0	0	0	0	0	0	22	128
orf19.2021-T-E1	orf19.2021-T	orf19.2021-T		6	42	14	216	1	0	88	5	4	2	0	0	7	0	0	0	0	1	0	0	42	128
orf19.2023-T-E1	orf19.2023-T	orf19.2023-T		0	40	5	223	0	0	115	0	0	0	0	0	5	0	0	0	0	0	0	0	40	108
orf19.2024-T-E1	orf19.2024-T	orf19.2024-T		3	4	8	238	0	0	153	3	0	0	0	0	8	0	0	0	0	0	0	0	4	85
orf19.2025-T-E1	orf19.2025-T	orf19.2025-T		3	3	5	185	0	0	121	2	0	0	0	0	5	0	0	1	0	1	1	0	3	64
orf19.2026-T-E1	orf19.2026-T	orf19.2026-T		0	9	8	209	0	0	80	0	0	0	0	0	8	0	0	0	0	0	0	0	9	129
orf19.2028-T-E1	orf19.2028-T	orf19.2028-T		0	4	3	176	0	0	81	0	0	0	0	0	3	0	0	0	0	0	0	0	4	95
orf19.2029-T-E1	orf19.2029-T	orf19.2029-T		0	6	3	177	0	0	87	0	0	0	0	0	3	0	0	0	0	0	0	0	6	90
orf19.203-T-E1	orf19.203-T	orf19.203-T		0	13	5	211	0	1	116	0	0	0	0	0	4	0	0	0	0	0	0	0	13	95
orf19.2030-T-E1	orf19.2030-T	orf19.2030-T		0	6	2	147	0	0	66	0	0	0	0	0	2	0	0	0	0	0	0	0	6	81
orf19.2031-T-E2	orf19.2031-T	orf19.2031-T		0	7	3	137	0	0	71	0	0	0	0	1	3	0	0	1	0	0	0	0	6	66
orf19.2032-T-E1	orf19.2032-T	orf19.2032-T		0	5	3	149	0	0	73	0	0	0	0	0	3	0	0	0	0	0	0	0	5	76
orf19.2033-T-E1	orf19.2033-T	orf19.2033-T		0	5	10	149	1	0	80	0	0	0	0	0	9	0	0	0	0	0	0	0	5	69
orf19.2034-T-E1	orf19.2034-T	orf19.2034-T		0	5	6	158	0	0	81	0	0	0	0	0	6	0	0	0	0	0	0	0	5	77
orf19.2035-T-E1	orf19.2035-T	orf19.2035-T		0	4	8	169	0	0	86	0	0	0	0	0	8	0	0	0	0	0	0	0	4	83
orf19.2036-T-E1	orf19.2036-T	orf19.2036-T		0	5	2	169	0	0	82	0	0	0	0	0	2	0	0	0	0	0	0	0	5	87
orf19.2037-T-E1	orf19.2037-T	orf19.2037-T		0	3	3	154	0	0	76	0	0	0	0	0	3	0	0	0	0	0	0	0	3	78
orf19.2038-T-E1	orf19.2038-T	orf19.2038-T		0	12	10	141	0	0	62	0	0	0	0	0	10	0	0	0	0	0	0	0	12	79
orf19.2039-T-E1	orf19.2039-T	orf19.2039-T		0	5	7	149	0	0	83	0	0	0	0	0	7	0	0	0	0	0	0	0	5	66
orf19.204-T-E1	orf19.204-T	orf19.204-T		4	5	10	181	0	0	81	3	1	0	0	0	9	0	0	0	0	1	0	0	5	100
orf19.2040-T-E1	orf19.2040-T	orf19.2040-T		0	13	7	144	0	0	85	0	0	0	0	0	7	0	0	1	0	0	0	1	12	59
orf19.2041-T-E1	orf19.2041-T	orf19.2041-T		0	13	6	134	0	0	62	0	0	0	0	0	6	0	0	0	0	0	0	0	13	72
orf19.2042-T-E1	orf19.2042-T	orf19.2042-T		0	8	5	123	0	0	65	0	0	0	0	0	5	0	0	0	0	0	0	0	8	58
orf19.2043-T-E1	orf19.2043-T	orf19.2043-T		0	1	7	120	0	0	60	0	0	0	0	0	7	0	0	0	0	0	0	0	1	60
orf19.2044-T-E1	orf19.2044-T	orf19.2044-T		0	4	12	121	0	0	64	0	0	0	0	0	12	0	0	0	0	0	0	0	4	57
orf19.2045-T-E1	orf19.2045-T	orf19.2045-T		0	0	5	128	0	0	64	0	0	0	0	0	5	0	0	0	0	0	0	0	0	64
orf19.2046-T-E1	orf19.2046-T	orf19.2046-T		0	8	7	120	0	0	51	0	0	0	0	0	7	0	0	0	0	0	0	0	8	69
orf19.2047-T-E1	orf19.2047-T	orf19.2047-T		0	4	5	121	0	0	57	0	0	0	0	0	5	0	0	0	0	0	0	0	4	64
orf19.2048-T-E1	orf19.2048-T	orf19.2048-T		0	0	0	128	0	0	62	0	0	0	0	0	0	0	0	0	0	0	0	0	0	66
orf19.2049-T-E1	orf19.2049-T	orf19.2049-T		0	4	11	117	0	0	60	0	0	0	0	0	11	0	0	0	0	0	0	0	4	57
orf19.2050-T-E1	orf19.2050-T	orf19.2050-T		0	8	5	154	0	0	84	0	0	0	0	0	5	0	0	0	0	0	0	0	8	70
orf19.2051-T-E2	orf19.2051-T	orf19.2051-T		0	20	29	133	0	0	65	0	0	0	0	3	29	0	0	0	0	0	0	0	20	65
orf19.2054-T-E1	orf19.2054-T	orf19.2054-T		0	9	3	146	0	0	59	0	0	0	0	0	3	0	0	0	0	0	0	0	9	87
orf19.2055-T-E1	orf19.2055-T	orf19.2055-T		2	7	11	149	0	1	78	2	0	0	0	0	10	0	0	0	0	0	0	0	7	71
orf19.2057-T-E1	orf19.2057-T	orf19.2057-T		0	14	9	195	0	0	76	0	0	0	0	0	9	0	0	0	0	0	0	0	14	119
orf19.2059-T-E1	orf19.2059-T	orf19.2059-T		0	9	6	174	0	0	62	0	0	0	0	0	6	0	0	0	0	0	0	0	9	112
orf19.206-T-E1	orf19.206-T	orf19.206-T		0	44	33	137	0	0	55	0	1	0	0	0	32	0	0	0	0	0	0	0	44	82
orf19.2060-T-E1	orf19.2060-T	orf19.2060-T		0	1	7	185	0	0	64	0	0	0	0	0	7	0	0	0	0	0	0	0	1	121
orf19.2061-T-E1	orf19.2061-T	orf19.2061-T		1	1	1	176	0	0	61	1	0	0	0	0	1	0	0	0	0	0	0	0	1	115
orf19.2062-T-E1	orf19.2062-T	orf19.2062-T		0	4	1	163	0	0	58	0	0	0	0	0	1	0	0	1	0	0	0	1	3	105
orf19.2063-T-E1	orf19.2063-T	orf19.2063-T		2	19	11	150	0	0	90	1	0	0	0	0	11	0	0	1	0	0	1	0	19	60
orf19.2064-T-E1	orf19.2064-T	orf19.2064-T		0	18	18	138	0	0	61	0	0	0	0	0	18	0	0	0	0	0	0	0	18	77
orf19.2065-T-E1	orf19.2065-T	orf19.2065-T		0	9	2	143	0	0	79	0	0	0	0	0	2	0	0	0	0	0	0	0	9	64
orf19.2066-T-E1	orf19.2066-T	orf19.2066-T		0	12	11	126	0	0	70	0	0	0	0	0	11	0	0	0	0	0	0	0	12	56
orf19.2066.1-T-E2	orf19.2066.1-T	orf19.2066.1-T		0	0	0	143	0	0	61	0	0	0	0	7	0	0	0	0	0	0	0	0	0	75
orf19.2067-T-E1	orf19.2067-T	orf19.2067-T		0	3	4	143	0	0	64	0	0	0	0	0	4	0	0	0	0	0	0	0	3	79
orf19.2068-T-E1	orf19.2068-T	orf19.2068-T		0	8	7	140	0	0	79	0	0	0	0	0	7	0	0	0	0	0	0	0	8	61
orf19.2069-T-E1	orf19.2069-T	orf19.2069-T		0	7	4	129	1	0	58	0	0	0	0	0	3	0	0	0	0	0	0	0	7	71
orf19.207-T-E1	orf19.207-T	orf19.207-T		4	29	32	186	4	1	84	4	2	1	0	0	24	0	0	0	0	0	0	0	29	102
orf19.2070-T-E1	orf19.2070-T	orf19.2070-T		0	8	7	125	0	0	62	0	0	0	0	1	7	0	0	0	0	0	0	0	8	62
orf19.2071-T-E1	orf19.2071-T	orf19.2071-T		0	1	4	124	0	0	62	0	0	0	0	0	4	0	0	0	0	0	0	0	1	62
orf19.2072-T-E1	orf19.2072-T	orf19.2072-T		0	6	5	131	0	0	61	0	0	0	0	0	5	0	0	0	0	0	0	0	6	70
orf19.2073-T-E1	orf19.2073-T	orf19.2073-T		0	10	6	143	0	1	65	0	0	0	0	0	5	0	0	0	0	0	0	0	10	78
orf19.2074-T-E1	orf19.2074-T	orf19.2074-T		1	2	4	134	0	0	62	0	0	0	0	0	4	0	0	0	1	0	0	0	2	72
orf19.2075-T-E1	orf19.2075-T	orf19.2075-T		0	6	5	155	0	0	70	0	0	0	0	0	5	0	0	0	0	0	0	0	6	85
orf19.2076-T-E1	orf19.2076-T	orf19.2076-T		1	5	5	138	0	0	67	0	0	0	0	0	5	0	0	1	0	0	1	0	5	71
orf19.2077-T-E1	orf19.2077-T	orf19.2077-T		0	23	16	155	0	0	77	0	1	0	0	0	15	0	0	0	0	0	0	0	23	78
orf19.2078-T-E1	orf19.2078-T	orf19.2078-T		0	7	9	155	0	0	86	0	0	0	0	0	9	0	0	0	0	0	0	0	7	69
orf19.2079-T-E1	orf19.2079-T	orf19.2079-T		0	1	3	139	0	0	61	0	0	0	0	0	3	0	0	0	0	0	0	0	1	78
orf19.2081-T-E1	orf19.2081-T	orf19.2081-T		0	23	18	160	1	0	83	0	0	0	0	0	17	0	0	0	0	0	0	0	23	77
orf19.2082-T-E1	orf19.2082-T	orf19.2082-T		0	11	11	156	0	0	60	0	0	0	0	0	11	0	0	1	0	0	0	1	10	96
orf19.2084-T-E1	orf19.2084-T	orf19.2084-T		0	9	7	185	0	0	118	0	0	0	0	0	7	0	0	0	0	0	0	0	9	67
orf19.2087-T-E1	orf19.2087-T	orf19.2087-T		0	8	7	180	0	0	72	0	0	0	0	0	7	0	0	0	0	0	0	0	8	108
orf19.2088-T-E1	orf19.2088-T	orf19.2088-T		0	11	12	162	2	0	78	0	0	1	0	0	9	0	0	0	0	0	0	0	11	84
orf19.2089-T-E1	orf19.2089-T	orf19.2089-T		0	8	5	176	0	0	94	0	0	0	0	2	5	0	0	0	0	0	0	0	8	80
orf19.209-T-E1	orf19.209-T	orf19.209-T		0	4	4	179	0	0	93	0	0	0	0	0	4	0	0	0	0	0	0	0	4	86
orf19.2090-T-E1	orf19.2090-T	orf19.2090-T		0	22	26	162	2	0	66	0	1	0	0	0	23	0	0	0	0	0	0	0	22	96
orf19.2091-T-E1	orf19.2091-T	orf19.2091-T		0	4	4	117	0	0	44	0	0	0	0	0	4	0	0	0	0	0	0	0	4	73
orf19.2092-T-E1	orf19.2092-T	orf19.2092-T		0	5	3	103	0	0	40	0	0	0	0	0	3	0	0	0	0	0	0	0	5	63
orf19.2093-T-E1	orf19.2093-T	orf19.2093-T		0	9	3	116	0	0	52	0	0	0	0	0	3	0	0	0	0	0	0	0	9	64
orf19.2094-T-E1	orf19.2094-T	orf19.2094-T		0	11	10	106	0	0	59	0	0	0	0	0	10	0	0	0	0	0	0	0	11	47
orf19.2095-T-E1	orf19.2095-T	orf19.2095-T		0	15	7	103	0	0	56	0	0	0	0	0	7	0	0	0	0	0	0	0	15	47
orf19.2097-T-E1	orf19.2097-T	orf19.2097-T		2	11	14	110	0	0	53	2	0	0	0	0	14	0	0	0	0	0	0	0	11	57
orf19.2098-T-E1	orf19.2098-T	orf19.2098-T		0	3	2	119	0	0	56	0	0	0	0	0	2	0	0	0	0	0	0	0	3	63
orf19.2099-T-E2	orf19.2099-T	orf19.2099-T		0	13	15	121	0	0	65	0	0	0	0	1	15	0	0	0	0	0	0	0	13	55
orf19.21-T-E1	orf19.21-T	orf19.21-T		0	4	4	370	0	0	137	0	0	0	0	0	4	0	0	0	0	0	0	0	4	233
orf19.210-T-E1	orf19.210-T	orf19.210-T		0	13	11	207	0	0	108	0	1	0	0	0	10	0	0	0	0	0	0	0	13	99
orf19.2101-T-E1	orf19.2101-T	orf19.2101-T		0	2	2	128	0	0	56	0	0	0	0	0	2	0	0	0	0	0	0	0	2	72
orf19.2102-T-E1	orf19.2102-T	orf19.2102-T		0	4	7	125	0	3	77	0	0	0	0	0	4	0	0	0	0	0	0	0	4	48
orf19.2103-T-E1	orf19.2103-T	orf19.2103-T		0	1	3	129	0	0	49	0	0	0	0	0	3	0	0	0	0	0	0	0	1	80
orf19.2104-T-E1	orf19.2104-T	orf19.2104-T		0	2	4	142	0	0	56	0	0	0	0	0	4	0	0	0	0	0	0	0	2	86
orf19.2105-T-E1	orf19.2105-T	orf19.2105-T		0	3	5	141	0	0	78	0	0	0	0	0	5	0	0	0	0	0	0	0	3	63
orf19.2106-T-E1	orf19.2106-T	orf19.2106-T		0	2	2	154	0	0	87	0	0	0	0	0	2	0	0	0	0	0	0	0	2	67
orf19.2107-T-E2	orf19.2107-T	orf19.2107-T		0	12	7	141	0	0	79	0	0	0	0	0	7	0	0	0	0	0	0	0	12	62
orf19.2107.1-T-E1	orf19.2107.1-T	orf19.2107.1-T		0	0	0	158	0	0	73	0	0	0	0	0	0	0	0	0	0	0	0	0	0	85
orf19.2108-T-E1	orf19.2108-T	orf19.2108-T		0	8	7	165	0	0	83	0	0	0	0	0	7	0	0	0	0	0	0	0	8	82
orf19.211-T-E1	orf19.211-T	orf19.211-T		0	6	1	240	1	0	111	0	0	0	0	0	0	0	0	0	0	0	0	0	6	129
orf19.2110-T-E1	orf19.2110-T	orf19.2110-T		0	6	4	178	0	0	86	0	0	0	0	0	4	0	0	0	0	0	0	0	6	92
orf19.2111-T-E1	orf19.2111-T	orf19.2111-T		0	9	3	182	0	0	96	0	0	0	0	0	3	0	0	0	0	0	0	0	9	86
orf19.2111.2-T-E1	orf19.2111.2-T	orf19.2111.2-T		0	2	0	177	0	0	79	0	0	0	0	0	0	0	0	0	0	0	0	0	2	98
orf19.2112-T-E1	orf19.2112-T	orf19.2112-T		0	11	6	181	0	0	85	0	0	0	0	0	6	0	0	0	0	0	0	0	11	96
orf19.2113-T-E1	orf19.2113-T	orf19.2113-T		2	9	7	178	1	0	93	2	1	0	0	0	5	0	0	0	0	0	0	0	9	85
orf19.2114-T-E1	orf19.2114-T	orf19.2114-T		0	5	3	188	0	0	99	0	0	0	0	0	3	0	0	0	0	0	0	0	5	89
orf19.2115-T-E1	orf19.2115-T	orf19.2115-T		0	17	10	186	0	0	102	0	0	0	0	0	10	0	0	0	0	0	0	0	17	84
orf19.2116-T-E1	orf19.2116-T	orf19.2116-T		0	12	4	200	0	0	102	0	0	0	0	0	4	0	0	0	0	0	0	0	12	98
orf19.2117-T-E1	orf19.2117-T	orf19.2117-T		0	10	4	219	0	0	98	0	0	0	0	0	4	0	0	0	0	0	0	0	10	121
orf19.2119-T-E1	orf19.2119-T	orf19.2119-T		0	20	8	202	4	2	90	0	0	0	0	0	2	0	0	0	0	0	0	0	20	112
orf19.212-T-E1	orf19.212-T	orf19.212-T		0	7	0	250	0	0	151	0	0	0	0	0	0	0	0	0	0	0	0	0	7	99
orf19.2123-T-E1	orf19.2123-T	orf19.2123-T		0	6	5	341	0	0	71	0	0	0	0	0	5	0	0	0	0	0	0	0	6	270
orf19.2124-T-E1	orf19.2124-T	orf19.2124-T		1	12	5	330	0	0	262	0	0	0	0	0	5	0	0	0	0	1	0	0	12	68
orf19.2125-T-E1	orf19.2125-T	orf19.2125-T		5	6	3	298	0	0	75	5	1	0	0	0	2	0	0	0	0	0	0	0	6	223
orf19.2127-T-E1	orf19.2127-T	orf19.2127-T		0	5	9	212	0	0	105	0	0	0	0	0	9	0	0	0	0	0	0	0	5	107
orf19.2128-T-E1	orf19.2128-T	orf19.2128-T		1	11	5	192	0	0	117	0	0	0	0	0	5	0	0	0	0	1	0	0	11	75
orf19.2129-T-E1	orf19.2129-T	orf19.2129-T		5	18	29	166	0	0	75	4	0	0	0	0	29	0	0	0	0	1	0	0	18	91
orf19.213-T-E1	orf19.213-T	orf19.213-T		0	13	3	246	0	0	87	0	0	0	0	0	3	0	0	0	0	0	0	0	13	159
orf19.2131-T-E1	orf19.2131-T	orf19.2131-T		1	15	18	204	0	0	96	0	0	1	0	0	18	0	0	0	1	0	0	0	15	108
orf19.2132-T-E1	orf19.2132-T	orf19.2132-T		0	1	3	217	0	0	112	0	0	0	0	0	3	0	0	0	0	0	0	0	1	105
orf19.2133-T-E1	orf19.2133-T	orf19.2133-T		0	14	6	201	0	0	91	0	0	0	0	0	6	0	0	0	0	0	0	0	14	110
orf19.2135-T-E1	orf19.2135-T	orf19.2135-T		2	38	24	215	1	0	107	2	1	0	0	0	22	0	0	0	0	0	0	0	38	108
orf19.2137-T-E1	orf19.2137-T	orf19.2137-T		2	24	18	169	0	0	82	2	0	0	0	0	18	0	0	0	0	0	0	0	24	87
orf19.2138-T-E1	orf19.2138-T	orf19.2138-T		0	42	10	234	0	0	130	0	0	0	0	0	10	0	0	0	0	0	0	0	42	104
orf19.2143-T-E1	orf19.2143-T	orf19.2143-T		0	48	34	201	0	0	108	0	0	0	0	0	34	0	0	0	0	0	0	0	48	93
orf19.2146-T-E1	orf19.2146-T	orf19.2146-T		1	6	2	221	0	0	145	0	0	0	0	0	2	0	0	0	0	1	0	0	6	76
orf19.2149-T-E1	orf19.2149-T	orf19.2149-T		0	24	6	220	0	0	136	0	0	0	0	0	6	0	0	0	0	0	0	0	24	84
orf19.215-T-E1	orf19.215-T	orf19.215-T		0	34	14	306	0	0	90	0	0	0	0	0	14	0	0	0	0	0	0	0	34	216
orf19.2150-T-E1	orf19.2150-T	orf19.2150-T		0	13	2	211	0	0	103	0	0	0	0	0	2	0	0	0	0	0	0	0	13	108
orf19.2151-T-E1	orf19.2151-T	orf19.2151-T		1	30	13	207	0	0	135	1	0	0	0	0	13	0	0	0	0	0	0	0	30	72
orf19.2154-T-E1	orf19.2154-T	orf19.2154-T		0	7	10	247	0	0	158	0	0	0	0	0	10	0	0	0	0	0	0	0	7	89
orf19.2156-T-E1	orf19.2156-T	orf19.2156-T		0	15	6	246	0	0	95	0	0	0	0	0	6	0	0	0	0	0	0	0	15	151
orf19.2157-T-E1	orf19.2157-T	orf19.2157-T		0	18	2	301	0	0	195	0	0	0	0	0	2	0	0	0	0	0	0	0	18	106
orf19.2158-T-E1	orf19.2158-T	orf19.2158-T		1	62	9	294	0	0	104	0	0	2	0	0	7	0	0	0	0	1	0	0	62	190
orf19.216-T-E1	orf19.216-T	orf19.216-T		0	41	11	361	0	0	220	0	0	0	0	0	11	0	0	0	0	0	0	0	41	141
orf19.216.1-T-E1	orf19.216.1-T	orf19.216.1-T		0	2	0	396	0	0	178	0	0	0	0	0	0	0	0	0	0	0	0	0	2	218
orf19.2160-T-E1	orf19.2160-T	orf19.2160-T		2	38	3	474	0	0	154	2	0	0	0	0	3	0	0	0	0	0	0	0	38	320
orf19.2163-T-E1	orf19.2163-T	orf19.2163-T		7	80	35	432	2	0	227	7	1	1	0	0	31	0	0	0	0	0	0	0	80	205
orf19.2164.1-T-E1	orf19.2164.1-T	orf19.2164.1-T		0	3	0	401	0	0	186	0	0	0	0	0	0	0	0	0	0	0	0	0	3	215
orf19.2165-T-E1	orf19.2165-T	orf19.2165-T		0	20	9	390	0	0	227	0	0	0	0	0	9	0	0	0	0	0	0	0	20	163
orf19.2166-T-E1	orf19.2166-T	orf19.2166-T		0	18	1	428	0	0	296	0	1	0	0	0	0	0	0	0	0	0	0	0	18	132
orf19.2167-T-E2	orf19.2167-T	orf19.2167-T		0	9	10	421	1	0	151	0	0	0	0	2	9	0	0	1	0	0	0	0	8	269
orf19.2168-T-E1	orf19.2168-T	orf19.2168-T		1	19	6	346	0	0	171	0	0	0	0	0	6	0	0	1	0	1	0	1	18	175
orf19.2168.3-T-E2	orf19.2168.3-T	orf19.2168.3-T		0	5	2	265	0	0	125	0	0	0	0	8	2	0	0	0	0	0	0	0	5	132
orf19.2169-T-E1	orf19.2169-T	orf19.2169-T		0	3	7	259	0	0	126	0	0	0	0	0	7	0	0	0	0	0	0	0	3	133
orf19.217-T-E1	orf19.217-T	orf19.217-T		4	13	19	422	4	2	221	4	0	0	0	0	13	0	0	0	0	0	0	0	13	201
orf19.2170-T-E1	orf19.2170-T	orf19.2170-T		0	23	18	280	1	0	107	0	1	0	0	0	16	0	0	0	0	0	0	0	23	173
orf19.2172-T-E1	orf19.2172-T	orf19.2172-T		0	8	3	233	0	0	123	0	0	0	0	0	3	0	0	0	0	0	0	0	8	110
orf19.2173-T-E1	orf19.2173-T	orf19.2173-T		0	14	11	201	0	6	96	0	0	0	0	6	5	0	0	2	0	0	0	0	12	101
orf19.2174-T-E1	orf19.2174-T	orf19.2174-T		0	13	19	202	0	0	106	0	0	0	0	0	19	0	0	0	0	0	0	0	13	96
orf19.2175-T-E1	orf19.2175-T	orf19.2175-T		0	6	9	202	0	0	111	0	0	0	0	0	9	0	0	0	0	0	0	0	6	91
orf19.2176-T-E1	orf19.2176-T	orf19.2176-T		0	4	7	225	0	0	111	0	0	0	0	0	7	0	0	0	0	0	0	0	4	114
orf19.2177-T-E1	orf19.2177-T	orf19.2177-T		3	1	1	228	0	0	118	0	0	0	0	0	1	0	0	0	0	3	0	0	1	110
orf19.2178-T-E1	orf19.2178-T	orf19.2178-T		1	6	1	220	0	0	111	0	0	0	0	0	1	0	0	0	0	1	0	0	6	109
orf19.2178.1-T-E1	orf19.2178.1-T	orf19.2178.1-T		0	1	1	206	0	0	90	0	0	0	0	0	1	0	0	0	0	0	0	0	1	116
orf19.2179-T-E1	orf19.2179-T	orf19.2179-T		0	12	7	196	0	0	84	0	0	0	0	0	7	0	0	0	0	0	0	0	12	112
orf19.2179.2-T-E2	orf19.2179.2-T	orf19.2179.2-T		0	4	0	183	0	0	63	0	0	0	0	15	0	0	0	2	0	0	0	0	2	107
orf19.218-T-E1	orf19.218-T	orf19.218-T		1	2	3	456	0	0	218	0	0	0	0	0	3	0	0	0	0	1	0	0	2	238
orf19.2180-T-E1	orf19.2180-T	orf19.2180-T		0	9	2	165	0	1	47	0	0	0	0	0	1	0	0	0	0	0	0	0	9	118
orf19.2181-T-E1	orf19.2181-T	orf19.2181-T		0	1	9	162	0	1	118	0	0	0	0	0	8	0	0	0	0	0	0	0	1	44
orf19.2182-T-E1	orf19.2182-T	orf19.2182-T		0	42	19	195	1	0	94	0	0	0	0	0	18	0	0	0	0	0	0	0	42	101
orf19.2183-T-E1	orf19.2183-T	orf19.2183-T		0	5	1	193	0	0	118	0	0	0	0	0	1	0	0	0	0	0	0	0	5	75
orf19.2184-T-E1	orf19.2184-T	orf19.2184-T		0	10	9	165	0	0	69	0	0	0	0	0	9	0	0	1	0	0	0	1	9	96
orf19.2185-T-E1	orf19.2185-T	orf19.2185-T		0	15	9	205	0	0	104	0	0	0	0	0	9	0	0	0	0	0	0	0	15	101
orf19.2186-T-E1	orf19.2186-T	orf19.2186-T		0	6	3	194	0	0	91	0	0	0	0	0	3	0	0	0	0	0	0	0	6	103
orf19.2187-T-E1	orf19.2187-T	orf19.2187-T		0	8	4	217	0	0	99	0	0	0	0	0	4	0	0	0	0	0	0	0	8	118
orf19.2190-T-E1	orf19.2190-T	orf19.2190-T		5	15	40	160	3	3	70	5	1	9	0	0	24	0	0	0	0	0	0	0	15	90
orf19.2191-T-E1	orf19.2191-T	orf19.2191-T		0	3	4	191	0	0	106	0	0	0	0	0	4	0	0	0	0	0	0	0	3	85
orf19.2191.1-T-E1	orf19.2191.1-T	orf19.2191.1-T		0	0	1	177	0	0	85	0	0	0	0	0	1	0	0	0	0	0	0	0	0	92
orf19.2192-T-E1	orf19.2192-T	orf19.2192-T		0	34	10	172	0	0	95	0	0	0	0	0	10	0	0	0	0	0	0	0	34	77
orf19.2193-T-E1	orf19.2193-T	orf19.2193-T		0	6	4	149	0	0	93	0	0	0	0	0	4	0	0	0	0	0	0	0	6	56
orf19.2194-T-E1	orf19.2194-T	orf19.2194-T		0	5	1	157	0	0	88	0	0	0	0	0	1	0	0	0	0	0	0	0	5	69
orf19.2195-T-E1	orf19.2195-T	orf19.2195-T		0	4	1	143	0	0	84	0	0	0	0	0	1	0	0	1	0	0	0	1	3	59
orf19.2196-T-E1	orf19.2196-T	orf19.2196-T		0	8	4	143	0	0	60	0	0	0	0	0	4	0	0	0	0	0	0	0	8	83
orf19.2197-T-E1	orf19.2197-T	orf19.2197-T		0	7	10	137	0	0	47	0	0	0	0	0	10	0	0	0	0	0	0	0	7	90
orf19.2198-T-E1	orf19.2198-T	orf19.2198-T		0	18	17	145	0	0	67	0	0	0	0	0	17	0	0	0	0	0	0	0	18	78
orf19.2199-T-E1	orf19.2199-T	orf19.2199-T		0	7	5	167	0	0	82	0	0	0	0	0	5	0	0	0	0	0	0	0	7	85
orf19.22-T-E1	orf19.22-T	orf19.22-T		0	16	6	322	0	0	100	0	0	0	0	0	6	0	0	0	0	0	0	0	16	222
orf19.22.1-T-E1	orf19.22.1-T	orf19.22.1-T		7	13	24	333	0	0	154	2	0	0	0	0	24	0	0	0	0	0	5	1	12	179
orf19.220-T-E1	orf19.220-T	orf19.220-T		0	13	7	408	0	0	169	0	0	1	0	0	6	0	0	0	0	0	0	0	13	239
orf19.2200-T-E1	orf19.2200-T	orf19.2200-T		0	5	5	182	0	0	81	0	0	0	0	0	5	0	0	0	0	0	0	0	5	101
orf19.2201-T-E1	orf19.2201-T	orf19.2201-T		0	3	0	176	0	0	66	0	0	0	0	0	0	0	0	0	0	0	0	0	3	110
orf19.2202-T-E1	orf19.2202-T	orf19.2202-T		0	9	2	191	0	0	108	0	0	0	0	0	2	0	0	0	0	0	0	0	9	83
orf19.2203-T-E1	orf19.2203-T	orf19.2203-T		4	3	7	177	0	0	80	4	0	0	0	0	7	0	0	0	0	0	0	0	3	97
orf19.2203.1-T-E1	orf19.2203.1-T	orf19.2203.1-T		0	4	2	179	0	0	94	0	0	0	0	0	2	0	0	0	0	0	0	0	4	85
orf19.2204-T-E1	orf19.2204-T	orf19.2204-T		0	5	6	174	0	0	87	0	0	0	0	0	6	0	0	0	0	0	0	0	5	87
orf19.2204.2-T-E1	orf19.2204.2-T	orf19.2204.2-T		1	3	0	170	0	0	111	0	0	0	0	0	0	0	0	0	0	1	0	0	3	59
orf19.2208-T-E1	orf19.2208-T	orf19.2208-T		0	11	23	179	0	0	107	0	1	0	0	0	22	0	0	0	0	0	0	0	11	72
orf19.2209-T-E1	orf19.2209-T	orf19.2209-T		0	15	5	127	0	0	39	0	0	0	0	0	5	0	0	0	0	0	0	0	15	88
orf19.2210-T-E1	orf19.2210-T	orf19.2210-T		0	9	11	190	1	0	102	0	0	0	0	0	10	0	0	0	0	0	0	0	9	88
orf19.2211-T-E1	orf19.2211-T	orf19.2211-T		0	5	6	179	0	0	87	0	0	0	0	0	6	0	0	0	0	0	0	0	5	92
orf19.2212-T-E1	orf19.2212-T	orf19.2212-T		0	1	2	160	0	0	81	0	0	0	0	0	2	0	0	0	0	0	0	0	1	79
orf19.2213-T-E1	orf19.2213-T	orf19.2213-T		0	8	23	147	0	0	81	0	0	0	0	0	23	0	0	0	0	0	0	0	8	66
orf19.2214-T-E1	orf19.2214-T	orf19.2214-T		0	4	3	152	0	0	83	0	0	0	0	0	3	0	0	0	0	0	0	0	4	69
orf19.2215-T-E1	orf19.2215-T	orf19.2215-T		0	5	9	144	0	0	49	0	0	0	0	0	9	0	0	0	0	0	0	0	5	95
orf19.2216-T-E1	orf19.2216-T	orf19.2216-T		0	20	17	159	0	0	84	0	0	0	0	0	17	0	0	0	0	0	0	0	20	75
orf19.2219-T-E1	orf19.2219-T	orf19.2219-T		2	52	31	488	0	0	200	1	0	0	0	0	31	0	0	0	0	1	0	0	52	288
orf19.2220-T-E1	orf19.2220-T	orf19.2220-T		0	8	1	379	0	0	214	0	0	0	0	0	1	0	0	0	0	0	0	0	8	165
orf19.2222-T-E1	orf19.2222-T	orf19.2222-T		2	16	4	388	1	0	157	1	0	0	0	0	3	0	0	0	0	1	0	0	16	231
orf19.2227-T-E1	orf19.2227-T	orf19.2227-T		1	13	17	288	1	0	164	0	0	0	0	0	16	0	0	0	0	1	0	0	13	124
orf19.2228-T-E1	orf19.2228-T	orf19.2228-T		1	10	29	281	0	0	132	1	1	2	0	0	26	0	0	1	0	0	1	0	10	149
orf19.2229-T-E1	orf19.2229-T	orf19.2229-T		0	10	20	285	1	0	157	0	2	1	0	0	16	0	0	0	0	0	0	0	10	128
orf19.223-T-E1	orf19.223-T	orf19.223-T		0	25	10	418	0	3	225	0	0	0	0	0	7	0	0	0	0	0	0	0	25	193
orf19.2230-T-E1	orf19.2230-T	orf19.2230-T		0	2	0	260	0	0	122	0	0	0	0	0	0	0	0	0	0	0	0	0	2	138
orf19.2231-T-E1	orf19.2231-T	orf19.2231-T		0	4	7	263	0	0	132	0	0	1	0	0	6	0	0	0	0	0	0	0	4	131
orf19.2232-T-E2	orf19.2232-T	orf19.2232-T		0	2	1	248	0	0	130	0	0	0	0	12	1	0	0	0	0	0	0	0	2	106
orf19.2233-T-E1	orf19.2233-T	orf19.2233-T		0	3	2	255	0	0	130	0	0	0	0	0	2	0	0	0	0	0	0	0	3	125
orf19.2236-T-E1	orf19.2236-T	orf19.2236-T		0	32	42	265	1	2	131	0	1	5	0	0	33	0	0	0	0	0	0	0	32	134
orf19.2237-T-E1	orf19.2237-T	orf19.2237-T		2	10	23	260	0	0	141	1	0	0	0	0	23	0	0	0	0	1	0	0	10	119
orf19.2237.1-T-E1	orf19.2237.1-T	orf19.2237.1-T		0	1	6	271	0	0	156	0	0	0	0	0	6	0	0	0	0	0	0	0	1	115
orf19.2238-T-E1	orf19.2238-T	orf19.2238-T		7	34	66	315	10	9	165	6	2	5	0	0	40	0	0	1	0	1	0	1	33	150
orf19.2241-T-E1	orf19.2241-T	orf19.2241-T		4	6	6	284	0	0	130	4	0	0	0	0	6	0	0	0	0	0	0	0	6	154
orf19.2242-T-E1	orf19.2242-T	orf19.2242-T		0	16	5	318	0	0	176	0	0	0	0	0	5	0	0	0	0	0	0	0	16	142
orf19.2244-T-E1	orf19.2244-T	orf19.2244-T		0	14	3	303	0	0	166	0	0	0	0	0	3	0	0	1	0	0	0	1	13	137
orf19.2245-T-E1	orf19.2245-T	orf19.2245-T		0	10	1	319	0	0	159	0	0	0	0	0	1	0	0	0	0	0	0	0	10	160
orf19.2246-T-E1	orf19.2246-T	orf19.2246-T		0	12	9	298	2	0	144	0	2	0	0	0	5	0	0	1	0	0	0	1	11	154
orf19.2247-T-E1	orf19.2247-T	orf19.2247-T		0	17	10	345	0	0	131	0	0	0	0	0	10	0	0	0	0	0	0	0	17	214
orf19.2248-T-E1	orf19.2248-T	orf19.2248-T		0	35	6	359	0	0	161	0	0	0	0	0	6	0	0	0	0	0	0	0	35	198
orf19.2249-T-E1	orf19.2249-T	orf19.2249-T		0	14	4	356	0	0	221	0	0	0	0	0	4	0	0	0	0	0	0	0	14	135
orf19.225-T-E1	orf19.225-T	orf19.225-T		3	18	13	307	0	0	158	2	0	0	0	0	13	0	0	0	0	2	0	0	18	149
orf19.2250-T-E1	orf19.2250-T	orf19.2250-T		0	10	2	329	0	0	126	0	0	0	0	0	2	0	0	0	0	0	0	0	10	203
orf19.2251-T-E1	orf19.2251-T	orf19.2251-T		1	17	5	312	0	1	118	1	0	0	0	0	4	0	0	1	0	0	1	0	17	194
orf19.2252-T-E1	orf19.2252-T	orf19.2252-T		0	25	6	247	0	0	108	0	0	0	0	0	6	0	0	0	0	0	0	0	25	139
orf19.2253-T-E1	orf19.2253-T	orf19.2253-T		0	23	5	268	0	0	141	0	0	0	0	0	5	0	0	0	0	0	0	0	23	127
orf19.2256-T-E1	orf19.2256-T	orf19.2256-T		0	4	9	256	0	0	146	0	0	0	0	0	9	0	0	0	0	0	0	0	4	110
orf19.2257-T-E1	orf19.2257-T	orf19.2257-T		1	14	4	271	0	0	159	0	0	0	0	4	4	0	0	1	1	0	0	0	13	109
orf19.2258-T-E1	orf19.2258-T	orf19.2258-T		2	16	20	256	1	0	106	2	0	0	0	0	19	0	0	0	0	0	0	0	16	150
orf19.2259-T-E1	orf19.2259-T	orf19.2259-T		0	15	8	272	0	0	131	0	0	0	0	0	8	0	0	0	0	0	0	0	15	141
orf19.2260-T-E1	orf19.2260-T	orf19.2260-T		1	10	15	255	1	0	115	0	0	0	0	0	14	0	0	0	0	1	0	0	10	140
orf19.2261-T-E1	orf19.2261-T	orf19.2261-T		0	13	2	260	0	0	114	0	0	0	0	0	2	0	0	0	0	0	0	0	13	146
orf19.2262-T-E1	orf19.2262-T	orf19.2262-T		2	17	12	246	0	0	89	2	0	0	0	0	12	0	0	0	0	0	0	0	17	157
orf19.2263-T-E1	orf19.2263-T	orf19.2263-T		0	8	6	243	0	0	151	0	0	0	0	0	6	0	0	0	0	0	0	0	8	92
orf19.2264-T-E1	orf19.2264-T	orf19.2264-T		0	12	4	284	0	0	148	0	0	0	0	0	4	0	0	0	0	0	0	0	12	136
orf19.2265-T-E1	orf19.2265-T	orf19.2265-T		0	15	8	268	0	0	152	0	0	0	0	0	8	0	0	0	0	0	0	0	15	116
orf19.2266-T-E1	orf19.2266-T	orf19.2266-T		2	36	39	231	0	0	97	2	0	0	0	0	39	0	0	0	0	0	0	0	36	134
orf19.2267-T-E1	orf19.2267-T	orf19.2267-T		0	7	6	287	0	0	152	0	1	0	0	0	5	0	0	0	0	0	0	0	7	135
orf19.2268-T-E1	orf19.2268-T	orf19.2268-T		0	21	20	315	0	0	142	0	1	4	0	0	15	0	0	0	0	0	0	0	21	173
orf19.2269-T-E1	orf19.2269-T	orf19.2269-T		0	4	3	293	0	0	136	0	0	0	0	0	3	0	0	0	0	0	0	0	4	157
orf19.227-T-E1	orf19.227-T	orf19.227-T		21	1	9	560	1	2	330	19	0	0	0	0	8	0	0	0	0	5	0	0	1	230
orf19.2270-T-E1	orf19.2270-T	orf19.2270-T		0	26	13	305	0	1	133	0	1	3	0	0	8	0	0	0	0	0	0	0	26	172
orf19.2272-T-E1	orf19.2272-T	orf19.2272-T		3	16	17	297	1	0	152	3	2	2	0	0	12	0	0	0	0	0	0	0	16	145
orf19.2274-T-E1	orf19.2274-T	orf19.2274-T		0	13	8	252	1	0	129	0	0	0	0	0	7	0	0	0	0	0	0	0	13	123
orf19.2275-T-E1	orf19.2275-T	orf19.2275-T		0	10	5	255	1	0	137	0	0	0	0	0	4	0	0	0	0	0	0	0	10	118
orf19.2276-T-E1	orf19.2276-T	orf19.2276-T		0	2	0	268	0	0	123	0	0	0	0	0	0	0	0	0	0	0	0	0	2	145
orf19.2277-T-E1	orf19.2277-T	orf19.2277-T		0	12	3	269	1	0	144	0	0	0	0	0	2	0	0	1	0	0	0	1	11	125
orf19.2278-T-E1	orf19.2278-T	orf19.2278-T		0	2	4	213	0	0	83	0	0	0	0	0	4	0	0	0	0	0	0	0	2	130
orf19.2280-T-E1	orf19.2280-T	orf19.2280-T		2	22	24	199	0	0	111	2	0	1	0	0	23	0	0	0	0	0	0	0	22	88
orf19.2281-T-E1	orf19.2281-T	orf19.2281-T		0	8	5	203	0	0	92	0	0	0	0	0	5	0	0	0	0	0	0	0	8	111
orf19.2282-T-E1	orf19.2282-T	orf19.2282-T		0	8	9	187	0	0	73	0	0	0	0	0	9	0	0	0	0	0	0	0	8	114
orf19.2283-T-E1	orf19.2283-T	orf19.2283-T		0	4	1	199	0	0	87	0	0	0	0	0	1	0	0	0	0	0	0	0	4	112
orf19.2284-T-E1	orf19.2284-T	orf19.2284-T		0	7	7	210	0	0	115	0	0	0	0	0	7	0	0	0	0	0	0	0	7	95
orf19.2285-T-E1	orf19.2285-T	orf19.2285-T		0	25	22	188	0	0	90	0	0	0	0	0	22	0	0	0	0	0	0	0	25	98
orf19.2286-T-E1	orf19.2286-T	orf19.2286-T		0	12	2	205	0	0	87	0	0	0	0	0	2	0	0	0	0	0	0	0	12	118
orf19.2287-T-E1	orf19.2287-T	orf19.2287-T		0	3	2	197	0	0	113	0	0	0	0	0	2	0	0	0	0	0	0	0	3	84
orf19.2288-T-E1	orf19.2288-T	orf19.2288-T		0	18	5	172	0	0	57	0	0	0	0	0	5	0	0	0	0	0	0	0	18	115
orf19.2289-T-E1	orf19.2289-T	orf19.2289-T		0	6	6	145	0	0	48	0	0	0	0	0	6	0	0	0	0	0	0	0	6	97
orf19.229-T-E2	orf19.229-T	orf19.229-T		18	7	44	557	7	1	334	18	1	7	0	35	28	0	0	1	0	0	0	0	6	189
orf19.2290-T-E1	orf19.2290-T	orf19.2290-T		0	54	15	174	3	0	81	0	0	0	0	0	12	0	0	0	0	0	0	0	54	93
orf19.2296-T-E1	orf19.2296-T	orf19.2296-T		1	88	114	219	7	3	95	0	0	1	0	0	103	0	0	0	0	1	0	0	88	124
orf19.2297-T-E1	orf19.2297-T	orf19.2297-T		0	15	6	251	0	0	125	0	3	1	0	0	2	0	0	0	0	0	0	0	15	126
orf19.2298-T-E1	orf19.2298-T	orf19.2298-T		0	13	8	293	0	0	129	0	0	0	0	0	8	0	0	0	0	0	0	0	13	164
orf19.2299-T-E1	orf19.2299-T	orf19.2299-T		0	4	2	279	0	0	155	0	0	0	0	0	2	0	0	0	0	0	0	0	4	124
orf19.23-T-E1	orf19.23-T	orf19.23-T		2	24	17	349	0	0	128	2	0	0	0	0	17	0	0	0	0	0	0	0	24	221
orf19.230-T-E1	orf19.230-T	orf19.230-T		3	17	59	479	3	0	303	3	5	11	0	0	40	0	0	0	0	0	0	0	17	176
orf19.2301-T-E1	orf19.2301-T	orf19.2301-T		0	5	5	292	0	0	125	0	0	0	0	0	5	0	0	0	0	0	0	0	5	167
orf19.2302-T-E1	orf19.2302-T	orf19.2302-T		0	22	12	272	0	0	122	0	0	0	0	0	12	0	0	0	0	0	0	0	22	150
orf19.2303-T-E1	orf19.2303-T	orf19.2303-T		0	14	8	256	2	0	127	0	0	0	0	0	6	0	0	0	0	0	0	0	14	129
orf19.2304-T-E1	orf19.2304-T	orf19.2304-T		0	12	4	275	0	0	106	0	0	0	0	0	4	0	0	0	0	0	0	0	12	169
orf19.2305-T-E1	orf19.2305-T	orf19.2305-T		0	1	2	287	0	0	121	0	0	0	0	0	2	0	0	0	0	0	0	0	1	166
orf19.2306-T-E1	orf19.2306-T	orf19.2306-T		0	6	3	278	0	0	147	0	0	0	0	0	3	0	0	0	0	0	0	0	6	131
orf19.2307-T-E1	orf19.2307-T	orf19.2307-T		0	21	9	264	1	0	112	0	0	0	0	0	8	0	0	0	0	0	0	0	21	152
orf19.2308-T-E1	orf19.2308-T	orf19.2308-T		0	9	3	263	0	0	118	0	0	0	0	0	3	0	0	0	0	0	0	0	9	145
orf19.2309-T-E1	orf19.2309-T	orf19.2309-T		0	19	11	278	0	0	130	0	0	0	0	0	11	0	0	0	0	0	0	0	19	148
orf19.2309.2-T-E2	orf19.2309.2-T	orf19.2309.2-T		0	7	0	274	0	0	116	0	0	0	0	13	0	0	0	0	0	0	0	0	7	145
orf19.231-T-E1	orf19.231-T	orf19.231-T		8	25	15	417	1	2	163	8	0	0	0	0	12	0	0	0	0	1	0	0	25	254
orf19.2310-T-E1	orf19.2310-T	orf19.2310-T		1	12	15	246	0	0	120	0	0	0	0	4	15	0	0	0	0	1	0	0	12	122
orf19.2310.1-T-E1	orf19.2310.1-T	orf19.2310.1-T		0	1	0	273	0	0	138	0	0	0	0	0	0	0	0	0	0	0	0	0	1	135
orf19.2311-T-E1	orf19.2311-T	orf19.2311-T		0	6	2	299	0	0	150	0	0	0	0	7	2	0	0	0	0	0	0	0	6	142
orf19.2312-T-E1	orf19.2312-T	orf19.2312-T		3	23	31	250	0	0	106	0	0	0	0	0	31	0	0	1	0	2	1	0	23	144
orf19.2313-T-E1	orf19.2313-T	orf19.2313-T		0	21	8	279	0	0	148	0	0	0	0	0	8	0	0	0	0	0	0	0	21	131
orf19.2314-T-E1	orf19.2314-T	orf19.2314-T		0	8	1	313	0	0	161	0	0	0	0	0	1	0	0	0	0	0	0	0	8	152
orf19.2315-T-E1	orf19.2315-T	orf19.2315-T		0	13	8	324	0	0	164	0	0	0	0	0	8	0	0	0	0	0	0	0	13	160
orf19.2317-T-E1	orf19.2317-T	orf19.2317-T		0	4	1	302	0	0	124	0	0	0	0	0	1	0	0	0	0	0	0	0	4	178
orf19.2318.1-T-E1	orf19.2318.1-T	orf19.2318.1-T		0	10	3	297	0	0	163	0	0	0	0	3	3	0	0	0	0	0	0	0	10	131
orf19.2319-T-E1	orf19.2319-T	orf19.2319-T		0	25	11	320	0	0	163	0	0	0	0	0	11	0	0	0	0	0	0	0	25	157
orf19.232-T-E1	orf19.232-T	orf19.232-T		3	7	15	314	6	0	168	3	0	2	0	0	7	0	0	0	0	0	0	0	7	146
orf19.2320-T-E1	orf19.2320-T	orf19.2320-T		1	19	15	287	1	1	107	0	0	0	0	0	13	0	0	0	0	1	0	0	19	180
orf19.2322.3-T-E2	orf19.2322.3-T	orf19.2322.3-T		0	11	3	228	0	0	93	0	0	0	0	2	3	0	0	1	0	0	0	0	10	134
orf19.2324-T-E1	orf19.2324-T	orf19.2324-T		0	17	12	270	0	0	117	0	0	0	0	0	12	0	0	0	0	0	0	0	17	153
orf19.2325-T-E1	orf19.2325-T	orf19.2325-T		0	9	11	273	0	0	137	0	0	0	0	0	11	0	0	0	0	0	0	0	9	136
orf19.2326-T-E1	orf19.2326-T	orf19.2326-T		0	10	11	281	1	0	163	0	0	0	0	0	10	0	0	0	0	0	0	0	10	118
orf19.2328-T-E1	orf19.2328-T	orf19.2328-T		0	8	5	227	0	0	111	0	0	0	0	0	5	0	0	0	0	0	0	0	8	116
orf19.2329.1-T-E1	orf19.2329.1-T	orf19.2329.1-T		0	4	0	259	0	0	141	0	0	0	0	9	0	0	0	0	0	0	0	0	4	109
orf19.233.1-T-E1	orf19.233.1-T	orf19.233.1-T		0	4	0	342	0	0	164	0	0	0	0	2	0	0	0	1	0	0	0	0	3	177
orf19.2330-T-E1	orf19.2330-T	orf19.2330-T		1	18	7	225	0	0	120	1	0	0	0	0	7	0	0	0	0	0	0	0	18	105
orf19.2331-T-E1	orf19.2331-T	orf19.2331-T		0	13	1	243	0	0	86	0	0	0	0	0	1	0	0	0	0	0	0	0	13	157
orf19.2332-T-E1	orf19.2332-T	orf19.2332-T		0	2	5	203	0	0	115	0	0	0	0	0	5	0	0	0	0	0	0	0	2	88
orf19.2333-T-E1	orf19.2333-T	orf19.2333-T		0	12	3	192	0	1	99	0	0	0	0	0	2	0	0	0	0	0	0	0	12	93
orf19.2334-T-E1	orf19.2334-T	orf19.2334-T		0	7	4	187	0	0	86	0	0	0	0	0	4	0	0	0	0	0	0	0	7	101
orf19.2335-T-E1	orf19.2335-T	orf19.2335-T		0	12	7	186	0	0	87	0	0	0	0	0	7	0	0	0	0	0	0	0	12	99
orf19.2336-T-E1	orf19.2336-T	orf19.2336-T		0	1	3	166	0	0	78	0	0	0	0	0	3	0	0	0	0	0	0	0	1	88
orf19.2337-T-E1	orf19.2337-T	orf19.2337-T		0	14	7	158	0	0	60	0	0	0	0	0	7	0	0	0	0	0	0	0	14	98
orf19.234-T-E2	orf19.234-T	orf19.234-T		0	2	11	318	0	0	141	0	0	1	0	2	10	0	0	0	0	0	0	0	2	175
orf19.2340-T-E1	orf19.2340-T	orf19.2340-T		0	14	1	216	0	0	92	0	0	0	0	0	1	0	0	0	0	0	0	0	14	124
orf19.2341-T-E1	orf19.2341-T	orf19.2341-T		0	1	2	192	0	0	124	0	0	0	0	0	2	0	0	0	0	0	0	0	1	68
orf19.2342-T-E1	orf19.2342-T	orf19.2342-T		0	3	2	208	0	0	64	0	0	0	0	0	2	0	0	0	0	0	0	0	3	144
orf19.2343-T-E1	orf19.2343-T	orf19.2343-T		0	17	18	179	0	0	54	0	0	0	0	0	18	0	0	0	0	0	0	0	17	125
orf19.2343.1-T-E2	orf19.2343.1-T	orf19.2343.1-T		4	1	3	206	0	0	123	3	0	1	0	4	2	0	0	0	0	1	0	0	1	79
orf19.2344-T-E1	orf19.2344-T	orf19.2344-T		0	17	15	210	1	2	89	0	1	2	0	0	9	0	0	0	0	0	0	0	17	121
orf19.2346-T-E1	orf19.2346-T	orf19.2346-T		0	10	8	263	0	0	145	0	0	0	0	0	8	0	0	0	0	0	0	0	10	118
orf19.2347-T-E1	orf19.2347-T	orf19.2347-T		0	15	11	226	0	0	122	0	0	0	0	0	11	0	0	0	0	0	0	0	15	104
orf19.2350-T-E1	orf19.2350-T	orf19.2350-T		2	29	5	191	2	0	89	1	0	0	0	0	3	0	0	0	0	1	0	0	29	102
orf19.2351-T-E1	orf19.2351-T	orf19.2351-T		0	9	3	194	0	0	74	0	0	0	0	0	3	0	0	0	0	0	0	0	9	120
orf19.2352-T-E1	orf19.2352-T	orf19.2352-T		0	8	7	185	0	0	110	0	0	0	0	0	7	0	0	0	0	0	0	0	8	75
orf19.2356-T-E1	orf19.2356-T	orf19.2356-T		2	27	24	384	2	1	191	2	1	5	0	0	15	0	0	0	0	0	0	0	27	193
orf19.236-T-E1	orf19.236-T	orf19.236-T		0	5	2	302	0	0	149	0	0	0	0	0	2	0	0	0	0	0	0	0	5	153
orf19.2360-T-E1	orf19.2360-T	orf19.2360-T		0	100	16	393	0	0	162	0	0	0	0	0	16	0	0	0	0	0	0	0	100	231
orf19.2361-T-E1	orf19.2361-T	orf19.2361-T		0	29	17	215	0	0	89	0	0	0	0	0	17	0	0	0	0	0	0	0	29	126
orf19.2362-T-E1	orf19.2362-T	orf19.2362-T		0	14	9	243	0	0	98	0	0	0	0	0	9	0	0	0	0	0	0	0	14	145
orf19.2363-T-E1	orf19.2363-T	orf19.2363-T		0	5	1	251	0	0	141	0	0	0	0	0	1	0	0	0	0	0	0	0	5	110
orf19.2364-T-E1	orf19.2364-T	orf19.2364-T		1	36	7	271	0	0	155	0	0	0	0	0	7	0	0	0	0	1	0	0	36	116
orf19.2365-T-E1	orf19.2365-T	orf19.2365-T		0	107	25	273	0	0	165	0	0	0	0	0	25	0	0	0	0	0	0	0	107	108
orf19.2366-T-E1	orf19.2366-T	orf19.2366-T		1	28	22	371	0	0	105	1	0	0	0	0	22	0	0	0	0	0	0	0	28	266
orf19.2367-T-E1	orf19.2367-T	orf19.2367-T		0	7	7	407	0	0	207	0	0	0	0	0	7	0	0	0	0	0	0	0	7	200
orf19.2368-T-E1	orf19.2368-T	orf19.2368-T		2	10	38	398	3	0	162	2	2	3	0	0	30	0	0	0	0	0	0	0	10	236
orf19.2369-T-E1	orf19.2369-T	orf19.2369-T		2	28	6	446	0	0	265	2	0	0	0	0	6	0	0	0	0	0	0	0	28	181
orf19.2369.1-T-E1	orf19.2369.1-T	orf19.2369.1-T		0	6	0	415	0	0	175	0	0	0	0	0	0	0	0	0	0	0	0	0	6	240
orf19.2370-T-E1	orf19.2370-T	orf19.2370-T		6	26	26	394	0	0	240	6	0	0	0	0	26	0	0	0	0	0	0	0	26	154
orf19.2371-T-E1	orf19.2371-T	orf19.2371-T		1	6	9	230	0	0	124	1	0	2	0	0	7	0	0	0	0	0	0	0	6	106
orf19.2372-T-E1	orf19.2372-T	orf19.2372-T		2	65	43	292	0	0	176	2	0	1	0	0	42	0	0	0	0	0	0	0	65	116
orf19.2376-T-E1	orf19.2376-T	orf19.2376-T		0	9	14	175	0	0	96	0	0	0	0	0	14	0	0	0	0	0	0	0	9	79
orf19.2378-T-E1	orf19.2378-T	orf19.2378-T		0	3	5	183	0	0	109	0	0	0	0	0	5	0	0	0	0	0	0	0	3	74
orf19.2379-T-E2	orf19.2379-T	orf19.2379-T		0	13	11	203	3	0	80	0	0	1	0	2	7	0	0	0	0	0	0	0	13	121
orf19.238-T-E1	orf19.238-T	orf19.238-T		0	11	2	283	0	0	165	0	0	0	0	0	2	0	0	0	0	0	0	0	11	118
orf19.2381-T-E1	orf19.2381-T	orf19.2381-T		0	4	3	212	0	0	117	0	0	0	0	0	3	0	0	0	0	0	0	0	4	95
orf19.2382-T-E1	orf19.2382-T	orf19.2382-T		0	20	17	195	0	0	100	0	0	0	0	0	17	0	0	0	0	0	0	0	20	95
orf19.2383-T-E1	orf19.2383-T	orf19.2383-T		0	25	27	149	0	0	76	0	0	0	0	0	27	0	0	0	0	0	0	0	25	73
orf19.2384-T-E1	orf19.2384-T	orf19.2384-T		0	10	4	182	0	0	93	0	0	0	0	0	4	0	0	0	0	0	0	0	10	89
orf19.2385-T-E1	orf19.2385-T	orf19.2385-T		0	7	5	181	0	0	88	0	0	0	0	0	5	0	0	0	0	0	0	0	7	93
orf19.2386-T-E1	orf19.2386-T	orf19.2386-T		0	5	2	198	0	0	96	0	0	0	0	0	2	0	0	0	0	0	0	0	5	102
orf19.2387-T-E1	orf19.2387-T	orf19.2387-T		0	11	11	214	0	0	109	0	0	0	0	0	11	0	0	0	0	0	0	0	11	105
orf19.2389-T-E1	orf19.2389-T	orf19.2389-T		0	9	12	204	1	0	124	0	2	1	0	0	8	0	0	0	0	0	0	0	9	80
orf19.239-T-E1	orf19.239-T	orf19.239-T		0	46	19	351	1	0	164	0	1	1	0	0	16	0	0	0	0	0	0	0	46	187
orf19.2391-T-E1	orf19.2391-T	orf19.2391-T		0	13	7	208	0	0	87	0	0	0	0	0	7	0	0	0	0	0	0	0	13	121
orf19.2392-T-E1	orf19.2392-T	orf19.2392-T		0	4	5	206	0	0	107	0	0	0	0	0	5	0	0	0	0	0	0	0	4	99
orf19.2393-T-E3	orf19.2393-T	orf19.2393-T		0	12	9	207	0	0	106	0	0	0	0	3	9	0	0	1	0	0	0	0	11	99
orf19.2394-T-E1	orf19.2394-T	orf19.2394-T		1	12	17	201	0	0	98	0	0	0	0	0	17	0	0	0	0	1	0	0	12	103
orf19.2395-T-E1	orf19.2395-T	orf19.2395-T		0	12	3	284	0	0	158	0	0	0	0	0	3	0	0	0	0	0	0	0	12	126
orf19.2396-T-E1	orf19.2396-T	orf19.2396-T		0	10	4	332	0	0	108	0	0	0	0	0	4	0	0	0	0	0	0	0	10	224
orf19.2397-T-E1	orf19.2397-T	orf19.2397-T		1	14	6	419	1	0	104	0	0	0	0	0	5	0	0	0	0	1	0	0	14	315
orf19.2397.3-T-E1	orf19.2397.3-T	orf19.2397.3-T		0	17	10	456	1	0	217	0	0	0	0	7	9	0	0	2	0	0	0	0	16	233
orf19.2398-T-E1	orf19.2398-T	orf19.2398-T		0	11	3	572	0	0	273	0	0	1	0	0	2	0	0	0	0	0	0	0	11	299
orf19.2399-T-E1	orf19.2399-T	orf19.2399-T		6	46	35	509	0	0	271	6	1	1	0	0	33	0	0	0	0	0	0	0	46	238
orf19.24-T-E1	orf19.24-T	orf19.24-T		0	16	4	363	0	0	143	0	0	0	0	0	4	0	0	0	0	0	0	0	16	220
orf19.240-T-E1	orf19.240-T	orf19.240-T		0	4	3	321	0	0	208	0	0	0	0	0	3	0	0	0	0	0	0	0	4	113
orf19.2400-T-E1	orf19.2400-T	orf19.2400-T		2	48	59	506	3	6	249	2	1	3	0	0	46	0	0	0	0	1	0	0	48	257
orf19.2401-T-E1	orf19.2401-T	orf19.2401-T		1	47	22	480	0	0	209	1	0	0	0	0	22	0	0	1	0	0	1	0	47	271
orf19.2402-T-E1	orf19.2402-T	orf19.2402-T		0	13	2	511	0	0	213	0	0	0	0	0	2	0	0	0	0	0	0	0	13	298
orf19.2404-T-E1	orf19.2404-T	orf19.2404-T		0	70	43	421	0	0	151	0	0	0	0	0	43	0	0	0	0	0	0	0	70	270
orf19.2406-T-E1	orf19.2406-T	orf19.2406-T		0	17	5	400	0	0	252	0	0	0	0	0	5	0	0	0	0	0	0	0	17	148
orf19.2407-T-E1	orf19.2407-T	orf19.2407-T		0	35	6	368	0	0	217	0	0	0	0	0	6	0	0	0	0	0	0	0	35	151
orf19.2408-T-E1	orf19.2408-T	orf19.2408-T		0	15	3	325	0	0	174	0	0	0	0	0	3	0	0	1	0	0	0	1	14	151
orf19.2410-T-E1	orf19.2410-T	orf19.2410-T		4	25	37	328	0	0	144	3	0	0	0	0	37	0	0	1	0	1	0	1	24	184
orf19.2411-T-E1	orf19.2411-T	orf19.2411-T		1	6	12	313	0	0	157	0	0	0	0	0	12	0	0	0	0	1	0	0	6	156
orf19.2412-T-E1	orf19.2412-T	orf19.2412-T		0	4	1	296	0	0	147	0	0	0	0	0	1	0	0	0	0	0	0	0	4	149
orf19.2414-T-E1	orf19.2414-T	orf19.2414-T		0	14	14	273	0	0	156	0	0	0	0	0	14	0	0	0	0	0	0	0	14	117
orf19.2415-T-E1	orf19.2415-T	orf19.2415-T		3	35	16	305	0	0	171	2	0	0	0	0	16	0	0	0	0	1	0	0	35	134
orf19.2416.1-T-E2	orf19.2416.1-T	orf19.2416.1-T		0	8	3	278	0	0	146	0	0	0	0	5	3	0	0	1	0	0	0	0	7	128
orf19.2417-T-E1	orf19.2417-T	orf19.2417-T		0	47	10	336	0	0	167	0	0	0	0	0	10	0	0	0	0	0	0	0	47	169
orf19.2418-T-E1	orf19.2418-T	orf19.2418-T		0	9	10	248	0	0	118	0	0	0	0	0	10	0	0	0	0	0	0	0	9	130
orf19.2419-T-E1	orf19.2419-T	orf19.2419-T		0	12	2	284	0	0	145	0	0	0	0	0	2	0	0	0	0	0	0	0	12	139
orf19.242-T-E1	orf19.242-T	orf19.242-T		2	13	4	335	0	0	118	2	0	1	0	0	3	0	0	0	0	0	0	0	13	217
orf19.242.2-T-E1	orf19.242.2-T	orf19.242.2-T		0	3	0	374	0	0	169	0	0	0	0	0	0	0	0	0	0	0	0	0	3	205
orf19.2422-T-E1	orf19.2422-T	orf19.2422-T		0	18	12	278	0	0	139	0	0	0	0	0	12	0	0	0	0	0	0	0	18	139
orf19.2423-T-E2	orf19.2423-T	orf19.2423-T		0	16	6	290	0	0	129	0	0	0	0	7	6	0	0	2	0	0	0	0	15	155
orf19.2425-T-E1	orf19.2425-T	orf19.2425-T		0	24	11	245	0	0	116	0	0	0	0	0	11	0	0	0	0	0	0	0	24	129
orf19.2426-T-E1	orf19.2426-T	orf19.2426-T		0	7	3	246	0	0	132	0	0	0	0	0	3	0	0	0	0	0	0	0	7	114
orf19.2429-T-E1	orf19.2429-T	orf19.2429-T		2	17	24	353	0	0	192	1	0	0	0	0	24	0	0	0	0	1	0	0	17	161
orf19.243-T-E1	orf19.243-T	orf19.243-T		0	16	16	349	0	0	204	0	1	0	0	0	15	0	0	0	0	0	0	0	16	145
orf19.2430-T-E1	orf19.2430-T	orf19.2430-T		1	5	12	378	0	0	224	0	0	0	0	0	12	0	0	1	0	0	1	0	5	154
orf19.2431-T-E1	orf19.2431-T	orf19.2431-T		6	3	6	272	0	2	111	3	0	1	0	0	4	0	0	0	0	3	0	0	3	161
orf19.2432-T-E2	orf19.2432-T	orf19.2432-T		0	6	9	263	0	0	89	0	1	1	0	0	7	0	0	0	0	0	0	0	6	174
orf19.2433-T-E1	orf19.2433-T	orf19.2433-T		0	5	10	245	0	0	78	0	1	1	0	0	8	0	0	0	0	0	0	0	5	167
orf19.2434-T-E1	orf19.2434-T	orf19.2434-T		0	7	7	254	0	0	92	0	0	0	0	0	7	0	0	0	0	0	0	0	7	162
orf19.2435-T-E1	orf19.2435-T	orf19.2435-T		0	21	3	221	0	1	103	0	0	0	0	0	2	0	0	0	0	0	0	0	21	118
orf19.2436-T-E1	orf19.2436-T	orf19.2436-T		0	16	19	211	2	1	132	0	2	0	0	0	14	0	0	0	0	0	0	0	16	79
orf19.2437-T-E1	orf19.2437-T	orf19.2437-T		0	15	6	219	0	0	121	0	0	2	0	0	4	0	0	0	0	0	0	0	15	98
orf19.2438-T-E1	orf19.2438-T	orf19.2438-T		0	4	3	225	0	2	101	0	0	0	0	0	1	0	0	0	0	0	0	0	4	124
orf19.2439-T-E1	orf19.2439-T	orf19.2439-T		0	1	3	224	0	0	112	0	0	0	0	0	3	0	0	0	0	0	0	0	1	112
orf19.2439.1-T-E2	orf19.2439.1-T	orf19.2439.1-T		0	3	1	215	0	0	92	0	0	0	0	10	1	0	0	0	0	0	0	0	3	113
orf19.244-T-E1	orf19.244-T	orf19.244-T		0	9	4	366	0	0	216	0	0	0	0	0	4	0	0	0	0	0	0	0	9	150
orf19.2440-T-E1	orf19.2440-T	orf19.2440-T		1	16	16	257	3	0	127	1	0	0	0	0	13	0	0	0	0	0	0	0	16	130
orf19.2442-T-E1	orf19.2442-T	orf19.2442-T		0	4	7	256	0	0	131	0	0	1	0	0	6	0	0	1	0	0	0	1	3	125
orf19.2443-T-E1	orf19.2443-T	orf19.2443-T		0	20	9	266	0	0	109	0	0	0	0	0	9	0	0	0	0	0	0	0	20	157
orf19.2444-T-E1	orf19.2444-T	orf19.2444-T		0	5	2	270	0	0	117	0	0	0	0	0	2	0	0	0	0	0	0	0	5	153
orf19.2445-T-E1	orf19.2445-T	orf19.2445-T		1	17	5	269	0	0	131	1	0	0	0	0	5	0	0	1	0	0	1	0	17	138
orf19.2446-T-E1	orf19.2446-T	orf19.2446-T		1	5	9	411	0	0	250	0	0	0	0	0	9	0	0	0	0	1	0	0	5	161
orf19.2447-T-E1	orf19.2447-T	orf19.2447-T		1	23	12	441	0	0	147	0	0	1	0	0	11	0	0	0	0	1	0	0	23	294
orf19.2449-T-E1	orf19.2449-T	orf19.2449-T		16	68	91	329	4	6	137	14	2	2	0	0	77	0	0	0	0	2	0	0	68	192
orf19.245-T-E1	orf19.245-T	orf19.245-T		0	19	19	375	1	1	157	0	0	0	0	0	17	0	0	0	0	0	0	0	19	218
orf19.2451-T-E1	orf19.2451-T	orf19.2451-T		0	9	11	455	0	3	300	0	0	0	0	0	8	0	0	0	0	0	0	0	9	155
orf19.2452-T-E1	orf19.2452-T	orf19.2452-T		0	10	11	338	0	0	137	0	0	2	0	0	9	0	0	0	0	0	0	0	10	201
orf19.2454-T-E1	orf19.2454-T	orf19.2454-T		3	21	11	339	2	1	159	2	1	0	0	0	7	0	0	0	0	1	0	0	21	180
orf19.2455-T-E1	orf19.2455-T	orf19.2455-T		0	23	31	384	0	1	208	0	6	11	0	0	13	0	0	0	0	0	0	0	23	176
orf19.2457-T-E1	orf19.2457-T	orf19.2457-T		0	32	31	376	2	3	146	0	1	0	0	0	25	0	0	0	0	0	0	0	32	230
orf19.2458-T-E1	orf19.2458-T	orf19.2458-T		0	20	21	446	0	3	232	0	0	2	0	0	16	0	0	0	0	0	0	0	20	214
orf19.2459-T-E1	orf19.2459-T	orf19.2459-T		0	53	30	504	1	0	248	0	0	1	0	0	28	0	0	0	0	0	0	0	53	256
orf19.246-T-E1	orf19.246-T	orf19.246-T		0	42	19	355	0	0	189	0	0	0	0	0	19	0	0	0	0	0	0	0	42	166
orf19.2460-T-E1	orf19.2460-T	orf19.2460-T		0	18	9	459	2	0	204	0	0	2	0	0	5	0	0	0	0	0	0	0	18	255
orf19.2461-T-E1	orf19.2461-T	orf19.2461-T		0	31	3	473	0	0	254	0	0	0	0	0	3	0	0	0	0	0	0	0	31	219
orf19.2462-T-E1	orf19.2462-T	orf19.2462-T		1	19	9	440	0	0	236	0	0	0	0	0	9	0	0	0	0	1	0	0	19	204
orf19.2463-T-E1	orf19.2463-T	orf19.2463-T		0	22	14	423	0	0	236	0	0	0	0	0	14	0	0	0	0	0	0	0	22	187
orf19.2465-T-E1	orf19.2465-T	orf19.2465-T		3	16	26	399	0	0	242	2	0	1	0	0	25	0	0	0	1	0	0	0	16	157
orf19.2467-T-E1	orf19.2467-T	orf19.2467-T		0	27	4	369	0	0	214	0	0	0	0	0	4	0	0	0	0	0	0	0	27	155
orf19.2468-T-E1	orf19.2468-T	orf19.2468-T		2	19	12	331	0	0	204	0	0	0	0	0	12	0	0	0	0	2	0	0	19	127
orf19.2469-T-E1	orf19.2469-T	orf19.2469-T		0	6	5	334	0	0	146	0	0	0	0	0	5	0	0	0	0	0	0	0	6	188
orf19.247-T-E1	orf19.247-T	orf19.247-T		0	16	18	336	2	0	147	0	1	3	0	0	12	0	0	0	0	0	0	0	16	189
orf19.2471-T-E1	orf19.2471-T	orf19.2471-T		0	14	3	296	0	0	154	0	0	0	0	0	3	0	0	1	0	0	0	1	13	142
orf19.2472-T-E1	orf19.2472-T	orf19.2472-T		0	12	5	292	0	0	134	0	0	0	0	0	5	0	0	0	0	0	0	0	12	158
orf19.2472.1-T-E1	orf19.2472.1-T	orf19.2472.1-T		0	4	0	293	0	0	160	0	0	0	0	0	0	0	0	0	0	0	0	0	4	133
orf19.2473-T-E1	orf19.2473-T	orf19.2473-T		0	20	11	310	0	0	154	0	0	0	0	0	11	0	0	0	0	0	0	0	20	156
orf19.2474-T-E1	orf19.2474-T	orf19.2474-T		1	21	14	265	0	0	126	1	0	0	0	0	14	0	0	0	0	0	0	0	21	139
orf19.2475-T-E1	orf19.2475-T	orf19.2475-T		0	3	6	258	0	0	110	0	0	0	0	0	6	0	0	0	0	0	0	0	3	148
orf19.2476-T-E1	orf19.2476-T	orf19.2476-T		0	57	66	300	0	0	149	0	0	1	0	0	65	0	0	0	0	0	0	0	57	151
orf19.2478-T-E1	orf19.2478-T	orf19.2478-T		0	20	18	271	0	0	136	0	0	0	0	0	18	0	0	0	0	0	0	0	20	135
orf19.2478.1-T-E1	orf19.2478.1-T	orf19.2478.1-T		0	8	1	319	0	0	160	0	0	0	0	21	1	0	0	2	0	0	0	0	6	140
orf19.2479-T-E1	orf19.2479-T	orf19.2479-T		0	26	5	307	0	0	139	0	0	0	0	0	5	0	0	0	0	0	0	0	26	168
orf19.248-T-E1	orf19.248-T	orf19.248-T		2	64	58	472	1	0	301	2	2	1	0	0	54	0	0	0	0	0	0	0	64	171
orf19.2480.1-T-E1	orf19.2480.1-T	orf19.2480.1-T		0	1	1	276	0	0	138	0	0	0	0	1	1	0	0	0	0	0	0	0	1	137
orf19.2481-T-E1	orf19.2481-T	orf19.2481-T		0	8	7	264	0	0	123	0	0	0	0	0	7	0	0	0	0	0	0	0	8	141
orf19.2483-T-E1	orf19.2483-T	orf19.2483-T		4	2	1	253	0	0	113	4	1	0	0	0	0	0	0	0	0	0	0	0	2	140
orf19.2484-T-E1	orf19.2484-T	orf19.2484-T		2	12	11	243	0	0	119	2	0	0	0	0	11	0	0	0	0	0	0	0	12	124
orf19.2485-T-E1	orf19.2485-T	orf19.2485-T		0	61	21	230	0	0	91	0	0	0	0	0	21	0	0	0	0	0	0	0	61	139
orf19.2487-T-E1	orf19.2487-T	orf19.2487-T		0	11	2	215	0	0	127	0	0	0	0	0	2	0	0	0	0	0	0	0	11	88
orf19.2488-T-E1	orf19.2488-T	orf19.2488-T		0	16	5	188	0	0	78	0	0	0	0	0	5	0	0	0	0	0	0	0	16	110
orf19.2489-T-E1	orf19.2489-T	orf19.2489-T		0	27	12	217	0	0	104	0	0	0	0	0	12	0	0	0	0	0	0	0	27	113
orf19.2492-T-E1	orf19.2492-T	orf19.2492-T		0	9	12	199	0	0	117	0	0	1	0	0	11	0	0	0	0	0	0	0	9	82
orf19.2494-T-E1	orf19.2494-T	orf19.2494-T		0	14	9	207	0	0	76	0	0	0	0	0	9	0	0	0	0	0	0	0	14	131
orf19.2495-T-E1	orf19.2495-T	orf19.2495-T		0	87	22	321	0	0	111	0	0	0	0	0	22	0	0	0	0	0	0	0	87	210
orf19.2496-T-E1	orf19.2496-T	orf19.2496-T		0	4	3	288	0	0	132	0	0	0	0	0	3	0	0	0	0	0	0	0	4	156
orf19.2498-T-E1	orf19.2498-T	orf19.2498-T		0	28	13	314	0	0	194	0	0	0	0	0	13	0	0	0	0	0	0	0	28	120
orf19.2499-T-E1	orf19.2499-T	orf19.2499-T		1	16	11	316	0	0	120	0	0	0	0	0	11	0	0	0	0	1	0	0	16	196
orf19.25-T-E1	orf19.25-T	orf19.25-T		1	10	11	327	0	2	162	0	0	0	0	0	9	0	0	1	0	0	1	0	10	165
orf19.250-T-E1	orf19.250-T	orf19.250-T		0	17	4	530	0	0	197	0	0	0	0	0	4	0	0	0	0	0	0	0	17	333
orf19.2500-T-E1	orf19.2500-T	orf19.2500-T		0	13	6	306	0	0	179	0	0	0	0	0	6	0	0	0	0	0	0	0	13	127
orf19.2501-T-E1	orf19.2501-T	orf19.2501-T		0	12	13	315	0	0	114	0	0	0	0	0	13	0	0	0	0	0	0	0	12	201
orf19.2503-T-E1	orf19.2503-T	orf19.2503-T		0	11	6	309	0	0	156	0	0	0	0	0	6	0	0	0	0	0	0	0	11	153
orf19.2504-T-E1	orf19.2504-T	orf19.2504-T		2	36	29	327	2	3	222	2	1	1	0	0	22	0	0	0	0	0	0	0	36	105
orf19.2505-T-E1	orf19.2505-T	orf19.2505-T		3	7	17	320	1	0	207	3	0	0	0	0	16	0	0	0	0	0	0	0	7	113
orf19.2506-T-E1	orf19.2506-T	orf19.2506-T		0	34	29	334	1	1	145	0	0	2	0	0	25	0	0	0	0	0	0	0	34	189
orf19.2507-T-E1	orf19.2507-T	orf19.2507-T		0	10	9	353	0	0	147	0	0	0	0	0	9	0	0	0	0	0	0	0	10	206
orf19.2508-T-E2	orf19.2508-T	orf19.2508-T		2	11	26	291	0	0	160	2	0	0	0	4	26	0	0	1	0	0	0	0	10	128
orf19.2509-T-E1	orf19.2509-T	orf19.2509-T		2	3	12	264	0	0	136	2	0	0	0	0	12	0	0	0	0	0	0	0	3	128
orf19.2509.1-T-E1	orf19.2509.1-T	orf19.2509.1-T		0	0	4	264	0	0	119	0	0	0	0	0	4	0	0	0	0	0	0	0	0	145
orf19.251-T-E1	orf19.251-T	orf19.251-T		0	28	9	530	0	0	231	0	0	0	0	0	9	0	0	0	0	0	0	0	28	299
orf19.2510-T-E1	orf19.2510-T	orf19.2510-T		0	17	27	300	0	0	142	0	0	0	0	0	27	0	0	0	0	0	0	0	17	158
orf19.2511.1-T-E1	orf19.2511.1-T	orf19.2511.1-T		0	1	1	285	0	0	155	0	0	0	0	0	1	0	0	0	0	0	0	0	1	130
orf19.2511.2-T-E1	orf19.2511.2-T	orf19.2511.2-T		0	4	2	276	0	0	161	0	0	0	0	0	2	0	0	0	0	0	0	0	4	115
orf19.2512-T-E1	orf19.2512-T	orf19.2512-T		1	5	17	294	1	2	153	1	2	2	0	0	10	0	0	1	0	0	1	0	5	141
orf19.2513-T-E1	orf19.2513-T	orf19.2513-T		5	15	22	352	1	1	159	4	2	2	0	0	16	0	0	0	0	1	0	0	15	193
orf19.2514-T-E1	orf19.2514-T	orf19.2514-T		8	9	14	372	0	4	199	8	0	2	0	0	8	0	0	0	0	0	0	0	9	173
orf19.2515-T-E1	orf19.2515-T	orf19.2515-T		8	20	57	352	5	2	171	7	14	4	0	0	32	0	0	0	0	1	0	0	20	181
orf19.2516-T-E1	orf19.2516-T	orf19.2516-T		4	3	10	401	0	1	202	4	2	1	0	0	6	0	0	0	0	0	0	0	3	199
orf19.2517-T-E1	orf19.2517-T	orf19.2517-T		1	8	5	187	0	0	95	1	0	0	0	0	5	0	0	0	0	0	0	0	8	92
orf19.2518-T-E1	orf19.2518-T	orf19.2518-T		0	3	4	174	0	0	70	0	0	0	0	0	4	0	0	0	0	0	0	0	3	104
orf19.2519-T-E1	orf19.2519-T	orf19.2519-T		0	5	5	178	0	0	99	0	0	0	0	0	5	0	0	0	0	0	0	0	5	79
orf19.252-T-E1	orf19.252-T	orf19.252-T		0	7	3	519	0	0	303	0	1	0	0	0	2	0	0	0	0	0	0	0	7	216
orf19.2520-T-E1	orf19.2520-T	orf19.2520-T		0	6	7	196	0	0	87	0	0	2	0	0	5	0	0	0	0	0	0	0	6	109
orf19.2521-T-E1	orf19.2521-T	orf19.2521-T		0	22	42	173	0	0	101	0	0	0	0	0	42	0	0	0	0	0	0	0	22	72
orf19.2524-T-E1	orf19.2524-T	orf19.2524-T		0	4	3	193	0	0	91	0	0	0	0	0	3	0	0	0	0	0	0	0	4	102
orf19.2525-T-E1	orf19.2525-T	orf19.2525-T		0	11	5	188	0	0	75	0	0	0	0	0	5	0	0	0	0	0	0	0	11	113
orf19.2527-T-E1	orf19.2527-T	orf19.2527-T		0	10	18	190	0	0	104	0	0	0	0	0	18	0	0	0	0	0	0	0	10	86
orf19.2528-T-E1	orf19.2528-T	orf19.2528-T		0	13	11	230	1	2	127	0	0	0	0	0	8	0	0	0	0	0	0	0	13	103
orf19.2529-T-E1	orf19.2529-T	orf19.2529-T		0	4	4	200	0	0	124	0	0	0	0	0	4	0	0	0	0	0	0	0	4	76
orf19.2529.1-T-E1	orf19.2529.1-T	orf19.2529.1-T		1	3	0	196	0	0	73	1	0	0	0	0	0	0	0	0	0	0	0	0	3	123
orf19.2530-T-E1	orf19.2530-T	orf19.2530-T		3	1	4	214	0	0	118	2	0	0	0	0	4	0	0	1	0	0	1	0	1	96
orf19.2531-T-E1	orf19.2531-T	orf19.2531-T		0	4	1	231	0	0	101	0	0	0	0	0	1	0	0	0	0	0	0	0	4	130
orf19.2532-T-E1	orf19.2532-T	orf19.2532-T		1	9	9	270	1	0	143	0	0	0	0	0	8	0	0	0	0	1	0	0	9	127
orf19.2533.1-T-E2	orf19.2533.1-T	orf19.2533.1-T		0	1	1	269	0	0	108	0	0	0	0	3	1	0	0	1	0	0	0	0	0	159
orf19.2534-T-E1	orf19.2534-T	orf19.2534-T		4	24	33	307	9	3	215	3	4	1	0	0	16	0	0	0	0	1	0	0	24	92
orf19.2537-T-E1	orf19.2537-T	orf19.2537-T		12	2	11	328	4	0	135	12	0	2	0	0	5	0	0	0	0	0	0	0	2	193
orf19.2538-T-E1	orf19.2538-T	orf19.2538-T		4	14	22	383	0	5	223	4	0	5	0	0	12	0	0	0	0	1	0	0	14	160
orf19.2539-T-E1	orf19.2539-T	orf19.2539-T		17	6	10	354	1	1	193	16	2	0	0	0	6	0	0	0	1	0	0	0	6	161
orf19.254-T-E1	orf19.254-T	orf19.254-T		5	41	21	577	2	0	310	5	0	0	0	0	19	0	0	1	0	0	0	1	40	267
orf19.2540-T-E1	orf19.2540-T	orf19.2540-T		2	26	47	371	5	4	150	2	2	4	0	0	32	0	0	0	0	0	0	0	26	221
orf19.2541-T-E1	orf19.2541-T	orf19.2541-T		1	8	21	362	2	0	230	1	0	5	0	0	14	0	0	1	0	0	1	0	8	132
orf19.2542-T-E1	orf19.2542-T	orf19.2542-T		0	9	14	314	2	2	116	0	0	4	0	0	6	0	0	0	0	0	0	0	9	198
orf19.2544-T-E1	orf19.2544-T	orf19.2544-T		2	6	11	281	2	0	122	2	0	1	0	0	8	0	0	0	0	1	0	0	6	159
orf19.2545-T-E1	orf19.2545-T	orf19.2545-T		2	22	11	300	0	0	173	2	0	1	0	0	10	0	0	0	0	0	0	0	22	127
orf19.2546-T-E2	orf19.2546-T	orf19.2546-T		0	14	11	283	0	0	133	0	0	0	0	5	11	0	0	0	0	0	0	0	14	145
orf19.2547-T-E1	orf19.2547-T	orf19.2547-T		0	31	44	233	0	0	118	0	0	0	0	0	44	0	0	0	0	0	0	0	31	115
orf19.2549-T-E1	orf19.2549-T	orf19.2549-T		0	13	12	251	0	0	132	0	0	1	0	0	11	0	0	0	0	0	0	0	13	119
orf19.255-T-E1	orf19.255-T	orf19.255-T		1	43	47	688	0	0	301	1	0	0	0	0	47	0	0	0	0	0	0	0	43	387
orf19.2551-T-E1	orf19.2551-T	orf19.2551-T		0	30	4	284	0	0	132	0	0	0	0	0	4	0	0	0	0	0	0	0	30	152
orf19.2552-T-E1	orf19.2552-T	orf19.2552-T		0	29	17	302	0	0	118	0	0	0	0	0	17	0	0	0	0	0	0	0	29	184
orf19.2553-T-E1	orf19.2553-T	orf19.2553-T		1	13	4	303	0	0	114	0	0	0	0	0	4	0	0	1	0	0	1	0	13	189
orf19.2555-T-E1	orf19.2555-T	orf19.2555-T		0	6	5	263	0	0	92	0	0	0	0	0	5	0	0	0	0	0	0	0	6	171
orf19.2557-T-E1	orf19.2557-T	orf19.2557-T		0	7	5	275	0	0	185	0	0	0	0	0	5	0	0	0	0	0	0	0	7	90
orf19.2558-T-E1	orf19.2558-T	orf19.2558-T		0	13	15	259	0	0	76	0	0	0	0	0	15	0	0	0	0	0	0	0	13	183
orf19.2559-T-E1	orf19.2559-T	orf19.2559-T		0	14	7	260	0	0	168	0	0	0	0	0	7	0	0	0	0	0	0	0	14	92
orf19.2560-T-E1	orf19.2560-T	orf19.2560-T		1	28	11	209	0	0	83	0	0	0	0	0	11	0	0	0	0	1	0	0	28	126
orf19.2563-T-E1	orf19.2563-T	orf19.2563-T		0	36	26	195	0	0	81	0	0	0	0	0	26	0	0	0	0	0	0	0	36	114
orf19.2564-T-E1	orf19.2564-T	orf19.2564-T		0	10	11	226	0	0	134	0	0	0	0	0	11	0	0	0	0	0	0	0	10	92
orf19.2565-T-E1	orf19.2565-T	orf19.2565-T		0	32	26	263	0	0	151	0	0	0	0	0	26	0	0	0	0	0	0	0	32	112
orf19.2568-T-E1	orf19.2568-T	orf19.2568-T		2	20	13	237	3	1	122	2	0	0	0	0	9	0	0	0	0	0	0	0	20	115
orf19.257-T-E1	orf19.257-T	orf19.257-T		1	1	12	607	0	0	390	1	0	0	0	0	12	0	0	0	0	0	0	0	1	217
orf19.2570-T-E1	orf19.2570-T	orf19.2570-T		0	6	2	256	0	0	122	0	0	0	0	0	2	0	0	0	0	0	0	0	6	134
orf19.2571-T-E1	orf19.2571-T	orf19.2571-T		0	2	1	251	0	0	130	0	0	0	0	0	1	0	0	0	0	0	0	0	2	121
orf19.2573-T-E1	orf19.2573-T	orf19.2573-T		0	24	5	254	0	0	143	0	0	0	0	0	5	0	0	0	0	0	0	0	24	111
orf19.2574-T-E1	orf19.2574-T	orf19.2574-T		0	36	16	239	0	0	141	0	0	0	0	0	16	0	0	0	0	0	0	0	36	98
orf19.2575-T-E1	orf19.2575-T	orf19.2575-T		0	9	7	201	0	0	88	0	0	0	0	0	7	0	0	0	0	0	0	0	9	113
orf19.2579-T-E1	orf19.2579-T	orf19.2579-T		0	16	15	202	0	0	111	0	0	0	0	0	15	0	0	0	0	0	0	0	16	91
orf19.258-T-E1	orf19.258-T	orf19.258-T		5	22	27	557	1	0	230	5	0	0	0	0	26	0	0	1	0	0	1	0	22	327
orf19.2580-T-E1	orf19.2580-T	orf19.2580-T		0	6	12	188	0	0	92	0	0	0	0	0	12	0	0	0	0	0	0	0	6	96
orf19.2581-T-E1	orf19.2581-T	orf19.2581-T		0	8	7	198	0	0	90	0	0	0	0	0	7	0	0	0	0	0	0	0	8	108
orf19.2582-T-E1	orf19.2582-T	orf19.2582-T		0	25	23	223	0	0	134	0	0	0	0	0	23	0	0	0	0	0	0	0	25	89
orf19.2583-T-E2	orf19.2583-T	orf19.2583-T		1	21	8	284	0	0	96	1	0	0	0	14	8	0	0	2	0	0	0	0	20	175
orf19.2583.1-T-E1	orf19.2583.1-T	orf19.2583.1-T		3	3	12	254	0	0	147	0	0	0	0	0	12	0	0	0	0	0	3	0	3	107
orf19.2583.2-T-E1	orf19.2583.2-T	orf19.2583.2-T		0	1	4	268	0	0	122	0	0	0	0	0	4	0	0	0	0	0	0	0	1	146
orf19.2584-T-E1	orf19.2584-T	orf19.2584-T		0	16	10	263	0	0	138	0	0	0	0	2	10	0	0	1	0	0	0	0	15	124
orf19.2585-T-E1	orf19.2585-T	orf19.2585-T		5	4	21	251	0	0	133	4	0	0	0	0	21	0	0	0	0	1	0	0	4	118
orf19.2587-T-E1	orf19.2587-T	orf19.2587-T		0	7	7	302	0	0	170	0	0	0	0	0	7	0	0	0	0	0	0	0	7	132
orf19.259-T-E1	orf19.259-T	orf19.259-T		0	12	14	630	0	0	242	0	1	0	0	0	13	0	0	0	0	0	0	0	12	388
orf19.2590-T-E1	orf19.2590-T	orf19.2590-T		0	3	8	289	0	0	151	0	0	0	0	0	8	0	0	0	0	0	0	0	3	138
orf19.2591-T-E1	orf19.2591-T	orf19.2591-T		0	15	5	270	0	0	130	0	0	0	0	0	5	0	0	0	0	0	0	0	15	140
orf19.2593-T-E1	orf19.2593-T	orf19.2593-T		0	11	7	232	0	0	116	0	0	0	0	0	7	0	0	0	0	0	0	0	11	116
orf19.2594-T-E1	orf19.2594-T	orf19.2594-T		0	8	9	230	0	0	94	0	0	0	0	0	9	0	0	0	0	0	0	0	8	136
orf19.2597-T-E1	orf19.2597-T	orf19.2597-T		0	11	4	218	0	0	135	0	0	0	0	0	4	0	0	0	0	0	0	0	11	83
orf19.2598-T-E2	orf19.2598-T	orf19.2598-T		0	3	4	203	0	0	117	0	0	0	0	5	4	0	0	2	0	0	0	0	1	83
orf19.2599-T-E1	orf19.2599-T	orf19.2599-T		0	9	3	190	0	0	115	0	0	0	0	0	3	0	0	0	0	0	0	0	9	75
orf19.26-T-E1	orf19.26-T	orf19.26-T		2	11	11	288	0	0	153	0	0	0	0	0	11	0	0	0	0	2	0	0	11	135
orf19.260-T-E1	orf19.260-T	orf19.260-T		0	57	7	613	0	0	382	0	0	0	0	0	7	0	0	0	0	0	0	0	57	231
orf19.2600-T-E1	orf19.2600-T	orf19.2600-T		0	12	12	218	0	0	95	0	0	0	0	0	12	0	0	0	0	0	0	0	12	123
orf19.2601-T-E1	orf19.2601-T	orf19.2601-T		0	12	5	246	0	0	83	0	0	0	0	0	5	0	0	0	0	0	0	0	12	163
orf19.2602-T-E1	orf19.2602-T	orf19.2602-T		9	35	20	248	0	1	126	8	0	3	0	0	17	0	0	0	0	2	0	0	35	122
orf19.2604-T-E1	orf19.2604-T	orf19.2604-T		3	9	15	240	0	0	162	3	0	0	0	0	15	0	0	0	0	0	0	0	9	78
orf19.2605-T-E1	orf19.2605-T	orf19.2605-T		0	14	15	228	0	0	108	0	0	0	0	0	15	0	0	0	0	0	0	0	14	120
orf19.2606-T-E1	orf19.2606-T	orf19.2606-T		0	24	8	255	0	0	108	0	0	0	0	0	8	0	0	0	0	0	0	0	24	147
orf19.2607-T-E1	orf19.2607-T	orf19.2607-T		0	6	10	212	0	0	103	0	0	0	0	0	10	0	0	0	0	0	0	0	6	109
orf19.2608-T-E1	orf19.2608-T	orf19.2608-T		0	7	1	224	0	0	107	0	0	0	0	0	1	0	0	0	0	0	0	0	7	117
orf19.2609-T-E1	orf19.2609-T	orf19.2609-T		0	11	6	223	0	0	147	0	0	0	0	0	6	0	0	0	0	0	0	0	11	76
orf19.261-T-E1	orf19.261-T	orf19.261-T		1	53	17	504	0	0	284	1	0	0	0	0	17	0	0	0	1	0	0	0	53	220
orf19.2610-T-E2	orf19.2610-T	orf19.2610-T		0	2	4	182	0	0	107	0	0	0	0	0	4	0	0	0	0	0	0	0	2	75
orf19.2611-T-E1	orf19.2611-T	orf19.2611-T		0	21	12	193	0	0	79	0	1	0	0	0	11	0	0	0	0	0	0	0	21	114
orf19.2612-T-E1	orf19.2612-T	orf19.2612-T		0	7	4	153	0	0	65	0	0	0	0	0	4	0	0	0	0	0	0	0	7	88
orf19.2613-T-E1	orf19.2613-T	orf19.2613-T		1	7	2	156	0	0	81	0	0	0	0	1	2	0	0	0	0	1	0	0	7	74
orf19.2614-T-E1	orf19.2614-T	orf19.2614-T		0	4	0	161	0	0	86	0	0	0	0	2	0	0	0	0	0	0	0	0	4	73
orf19.2615-T-E1	orf19.2615-T	orf19.2615-T		0	20	12	143	0	0	63	0	0	0	0	0	12	0	0	0	0	0	0	0	20	80
orf19.2616-T-E1	orf19.2616-T	orf19.2616-T		4	29	26	205	0	0	130	4	1	2	0	0	23	0	0	0	0	0	0	0	29	75
orf19.2618-T-E1	orf19.2618-T	orf19.2618-T		0	9	4	190	0	0	115	0	0	0	0	0	4	0	0	0	0	0	0	0	9	75
orf19.2619-T-E1	orf19.2619-T	orf19.2619-T		0	27	17	187	0	0	86	0	0	0	0	0	17	0	0	0	0	0	0	0	27	101
orf19.262-T-E1	orf19.262-T	orf19.262-T		0	85	39	462	1	2	219	0	2	3	0	0	31	0	0	0	0	0	0	0	85	243
orf19.2620-T-E1	orf19.2620-T	orf19.2620-T		4	19	35	285	4	0	125	4	0	0	0	0	31	0	0	0	0	0	0	0	19	160
orf19.2621-T-E1	orf19.2621-T	orf19.2621-T		0	1	1	330	0	0	119	0	0	0	0	2	1	0	0	0	0	0	0	0	1	209
orf19.2622-T-E1	orf19.2622-T	orf19.2622-T		1	7	1	314	0	0	203	1	0	0	0	0	1	0	0	0	0	0	0	0	7	111
orf19.2623-T-E1	orf19.2623-T	orf19.2623-T		2	22	19	316	0	0	191	2	0	1	0	0	18	0	0	0	0	0	0	0	22	125
orf19.2624-T-E1	orf19.2624-T	orf19.2624-T		0	19	20	271	0	0	109	0	0	0	0	0	20	0	0	0	0	0	0	0	19	162
orf19.2625-T-E1	orf19.2625-T	orf19.2625-T		5	0	5	316	0	1	126	5	0	0	0	0	4	0	0	0	0	0	0	0	0	190
orf19.2629-T-E1	orf19.2629-T	orf19.2629-T		4	59	87	193	0	0	93	4	3	0	0	0	84	0	0	0	0	0	0	0	59	100
orf19.263.1-T-E1	orf19.263.1-T	orf19.263.1-T		0	2	2	475	0	0	235	0	0	0	0	41	2	0	0	0	0	0	0	0	2	199
orf19.2630-T-E1	orf19.2630-T	orf19.2630-T		0	2	6	201	1	0	100	0	2	1	0	0	2	0	0	0	0	0	0	0	2	101
orf19.2631-T-E1	orf19.2631-T	orf19.2631-T		0	6	5	211	0	0	95	0	0	0	0	0	5	0	0	0	0	0	0	0	6	116
orf19.2633-T-E1	orf19.2633-T	orf19.2633-T		0	22	5	355	0	0	185	0	0	0	0	0	5	0	0	0	0	0	0	0	22	170
orf19.2633.1-T-E1	orf19.2633.1-T	orf19.2633.1-T		0	3	5	349	0	0	181	0	0	0	0	0	5	0	0	0	0	0	0	0	3	168
orf19.2637-T-E1	orf19.2637-T	orf19.2637-T		0	11	10	470	0	0	285	0	0	0	0	0	10	0	0	0	0	0	0	0	11	185
orf19.2638-T-E1	orf19.2638-T	orf19.2638-T		0	12	3	531	0	0	285	0	0	0	0	0	3	0	0	0	0	0	0	0	12	246
orf19.2638.1-T-E1	orf19.2638.1-T	orf19.2638.1-T		0	3	2	455	0	0	232	0	0	0	0	0	2	0	0	0	0	0	0	0	3	223
orf19.2639-T-E1	orf19.2639-T	orf19.2639-T		0	10	0	412	0	0	156	0	0	0	0	0	0	0	0	0	0	0	0	0	10	256
orf19.2639.1-T-E3	orf19.2639.1-T	orf19.2639.1-T		0	8	3	378	0	0	139	0	0	0	0	6	3	0	0	2	0	0	0	0	6	235
orf19.264-T-E1	orf19.264-T	orf19.264-T		0	22	18	437	1	0	204	0	1	0	0	0	16	0	0	0	0	0	0	0	22	233
orf19.2640-T-E1	orf19.2640-T	orf19.2640-T		0	2	2	423	0	0	179	0	0	0	0	0	2	0	0	0	0	0	0	0	2	244
orf19.2641-T-E1	orf19.2641-T	orf19.2641-T		0	21	3	431	0	0	223	0	0	0	0	0	3	0	0	1	0	0	0	1	20	208
orf19.2642-T-E1	orf19.2642-T	orf19.2642-T		0	4	4	416	0	0	213	0	0	0	0	0	4	0	0	0	0	0	0	0	4	203
orf19.2643-T-E1	orf19.2643-T	orf19.2643-T		0	7	0	374	0	0	144	0	0	0	0	0	0	0	0	0	0	0	0	0	7	230
orf19.2644-T-E1	orf19.2644-T	orf19.2644-T		0	13	5	369	0	0	156	0	0	0	0	0	5	0	0	0	0	0	0	0	13	213
orf19.2645-T-E1	orf19.2645-T	orf19.2645-T		1	3	12	349	0	0	181	1	1	0	0	0	11	0	0	0	0	0	0	0	3	168
orf19.2646-T-E1	orf19.2646-T	orf19.2646-T		0	60	43	381	2	3	174	0	1	4	0	0	33	0	0	0	0	0	0	0	60	207
orf19.2647-T-E1	orf19.2647-T	orf19.2647-T		4	10	26	364	1	0	189	3	0	0	0	0	25	0	0	1	0	0	1	0	10	175
orf19.2649-T-E1	orf19.2649-T	orf19.2649-T		2	9	13	383	1	0	184	2	3	0	0	0	9	0	0	0	0	0	0	0	9	199
orf19.265-T-E1	orf19.265-T	orf19.265-T		0	29	15	334	0	0	87	0	0	1	0	0	14	0	0	1	0	0	0	1	28	247
orf19.2650-T-E1	orf19.2650-T	orf19.2650-T		1	8	29	409	1	3	192	0	1	7	0	0	17	0	0	0	0	1	0	0	8	217
orf19.2650.1-T-E1	orf19.2650.1-T	orf19.2650.1-T		0	1	1	339	0	0	162	0	0	0	0	0	1	0	0	0	0	0	0	0	1	177
orf19.2651-T-E1	orf19.2651-T	orf19.2651-T		0	8	9	330	0	0	194	0	2	1	0	0	6	0	0	0	0	0	0	0	8	136
orf19.2652-T-E1	orf19.2652-T	orf19.2652-T		2	9	13	247	0	0	157	2	0	0	0	0	13	0	0	0	0	0	0	0	9	90
orf19.2653-T-E1	orf19.2653-T	orf19.2653-T		0	12	27	302	0	0	111	0	0	1	0	0	26	0	0	0	0	0	0	0	12	191
orf19.2654-T-E1	orf19.2654-T	orf19.2654-T		2	20	25	249	3	1	84	2	1	0	0	0	20	0	0	0	0	0	0	0	20	165
orf19.2655-T-E1	orf19.2655-T	orf19.2655-T		0	3	3	305	0	0	116	0	0	0	0	0	3	0	0	0	0	0	0	0	3	189
orf19.2657-T-E1	orf19.2657-T	orf19.2657-T		1	12	18	730	0	0	545	0	0	0	0	0	18	0	0	0	0	1	0	0	12	185
orf19.2660-T-E1	orf19.2660-T	orf19.2660-T		0	12	8	448	1	0	242	0	0	0	0	0	7	0	0	0	0	0	0	0	12	206
orf19.2661-T-E1	orf19.2661-T	orf19.2661-T		6	10	16	323	0	0	142	6	1	0	0	0	15	0	0	1	0	0	0	1	9	181
orf19.2662-T-E1	orf19.2662-T	orf19.2662-T		6	6	12	312	0	0	175	6	1	0	0	0	11	0	0	0	0	0	0	0	6	137
orf19.2663-T-E1	orf19.2663-T	orf19.2663-T		0	7	5	461	0	0	240	0	0	0	0	0	5	0	0	0	0	0	0	0	7	221
orf19.2664-T-E1	orf19.2664-T	orf19.2664-T		4	28	39	350	3	3	239	4	0	0	0	0	33	0	0	0	0	0	0	0	28	111
orf19.2665-T-E1	orf19.2665-T	orf19.2665-T		0	45	18	219	0	0	144	0	0	0	0	0	18	0	0	0	0	0	0	0	45	75
orf19.2667-T-E1	orf19.2667-T	orf19.2667-T		0	9	2	151	0	0	110	0	0	0	0	0	2	0	0	0	0	0	0	0	9	41
orf19.2668-T-E1	orf19.2668-T	orf19.2668-T		1	1	2	129	0	0	35	1	0	0	0	0	2	0	0	0	0	0	0	0	1	94
orf19.2669-T-E1	orf19.2669-T	orf19.2669-T		0	7	10	310	0	0	213	0	0	0	0	0	10	0	0	0	0	0	0	0	7	97
orf19.267-T-E1	orf19.267-T	orf19.267-T		4	28	26	339	1	0	220	4	0	0	0	0	25	0	0	0	0	0	0	0	28	119
orf19.2670-T-E1	orf19.2670-T	orf19.2670-T		0	12	8	264	0	0	233	0	0	0	0	0	8	0	0	0	0	0	0	0	12	31
orf19.2671-T-E1	orf19.2671-T	orf19.2671-T		0	58	29	279	0	0	55	0	0	0	0	0	29	0	0	1	0	0	0	1	57	224
orf19.2672-T-E1	orf19.2672-T	orf19.2672-T		1	27	7	396	0	0	201	0	0	0	0	0	7	0	0	0	0	1	0	0	27	195
orf19.2673-T-E1	orf19.2673-T	orf19.2673-T		0	19	3	368	0	0	232	0	0	0	0	0	3	0	0	0	0	0	0	0	19	136
orf19.2674-T-E1	orf19.2674-T	orf19.2674-T		0	12	9	317	1	0	130	0	0	0	0	0	8	0	0	0	0	0	0	0	12	187
orf19.2675-T-E1	orf19.2675-T	orf19.2675-T		0	59	34	307	0	0	191	0	0	0	0	0	34	0	0	0	0	0	0	0	59	116
orf19.2676-T-E1	orf19.2676-T	orf19.2676-T		0	12	7	250	0	0	113	0	0	0	0	0	7	0	0	0	0	0	0	0	12	137
orf19.2677-T-E1	orf19.2677-T	orf19.2677-T		1	14	12	259	0	0	127	0	0	0	0	0	12	0	0	0	0	1	0	0	14	132
orf19.2678-T-E1	orf19.2678-T	orf19.2678-T		0	39	24	241	0	0	118	0	0	0	0	0	24	0	0	0	0	0	0	0	39	123
orf19.268-T-E1	orf19.268-T	orf19.268-T		0	7	15	208	0	0	95	0	0	0	0	0	15	0	0	0	0	0	0	0	7	113
orf19.2680-T-E1	orf19.2680-T	orf19.2680-T		0	88	29	298	1	1	119	0	0	0	0	0	27	0	0	0	0	0	0	0	88	179
orf19.2681-T-E1	orf19.2681-T	orf19.2681-T		0	14	11	291	0	0	134	0	0	0	0	0	11	0	0	0	0	0	0	0	14	157
orf19.2682-T-E1	orf19.2682-T	orf19.2682-T		0	10	8	311	0	2	183	0	0	0	0	0	6	0	0	0	0	0	0	0	10	128
orf19.2684-T-E1	orf19.2684-T	orf19.2684-T		3	31	23	309	0	0	179	3	0	1	0	0	22	0	0	0	0	0	0	0	31	130
orf19.2685-T-E1	orf19.2685-T	orf19.2685-T		0	12	2	274	0	0	134	0	0	0	0	0	2	0	0	0	0	0	0	0	12	140
orf19.2686-T-E1	orf19.2686-T	orf19.2686-T		1	14	9	230	0	0	89	1	0	0	0	0	9	0	0	0	1	0	0	0	14	141
orf19.2687.1-T-E1	orf19.2687.1-T	orf19.2687.1-T		0	0	0	219	0	0	138	0	0	0	0	0	0	0	0	0	0	0	0	0	0	81
orf19.2688-T-E1	orf19.2688-T	orf19.2688-T		0	32	18	249	0	0	111	0	0	0	0	0	18	0	0	0	0	0	0	0	32	138
orf19.269-T-E1	orf19.269-T	orf19.269-T		1	11	2	213	0	0	127	1	0	0	0	0	2	0	0	0	0	0	0	0	11	86
orf19.2690-T-E1	orf19.2690-T	orf19.2690-T		0	20	12	228	0	0	98	0	0	0	0	0	12	0	0	0	0	0	0	0	20	130
orf19.2691-T-E1	orf19.2691-T	orf19.2691-T		0	2	6	187	0	0	66	0	0	0	0	0	6	0	0	0	0	0	0	0	2	121
orf19.2693-T-E1	orf19.2693-T	orf19.2693-T		0	6	2	186	0	0	51	0	0	0	0	0	2	0	0	1	0	0	0	1	5	135
orf19.2694-T-E1	orf19.2694-T	orf19.2694-T		0	8	5	182	0	0	128	0	0	0	0	0	5	0	0	0	0	0	0	0	8	54
orf19.2695-T-E1	orf19.2695-T	orf19.2695-T		1	32	28	133	0	0	50	0	0	0	0	0	28	0	0	0	0	1	0	0	32	83
orf19.2697-T-E1	orf19.2697-T	orf19.2697-T		0	25	31	147	0	0	65	0	0	0	0	0	31	0	0	0	0	0	0	0	25	82
orf19.2698-T-E1	orf19.2698-T	orf19.2698-T		0	4	1	138	0	0	83	0	0	0	0	0	1	0	0	0	0	0	0	0	4	55
orf19.2699-T-E1	orf19.2699-T	orf19.2699-T		0	8	15	158	1	0	59	0	0	0	0	0	14	0	0	0	0	0	0	0	8	99
orf19.27-T-E1	orf19.27-T	orf19.27-T		1	24	20	220	0	0	95	1	0	0	0	2	20	0	0	0	0	0	0	0	24	123
orf19.270-T-E1	orf19.270-T	orf19.270-T		0	4	3	211	0	0	129	0	0	0	0	0	3	0	0	0	0	0	0	0	4	82
orf19.2701-T-E1	orf19.2701-T	orf19.2701-T		0	3	0	194	0	0	83	0	0	0	0	0	0	0	0	0	0	0	0	0	3	111
orf19.2703-T-E1	orf19.2703-T	orf19.2703-T		0	16	14	209	0	0	74	0	0	0	0	0	14	0	0	0	0	0	0	0	16	135
orf19.2704-T-E1	orf19.2704-T	orf19.2704-T		1	2	3	214	0	0	87	1	0	0	0	0	3	0	0	0	0	0	0	0	2	127
orf19.2706-T-E1	orf19.2706-T	orf19.2706-T		0	23	17	192	1	2	86	0	2	0	0	0	12	0	0	0	0	0	0	0	23	106
orf19.2707.1-T-E1	orf19.2707.1-T	orf19.2707.1-T		0	3	0	216	0	0	84	0	0	0	0	0	0	0	0	0	0	0	0	0	3	132
orf19.2708-T-E1	orf19.2708-T	orf19.2708-T		0	6	3	231	0	0	95	0	0	0	0	0	3	0	0	0	0	0	0	0	6	136
orf19.2709-T-E1	orf19.2709-T	orf19.2709-T		0	16	6	227	0	0	90	0	0	0	0	0	6	0	0	0	0	0	0	0	16	137
orf19.271-T-E1	orf19.271-T	orf19.271-T		0	7	7	240	0	0	123	0	0	0	0	0	7	0	0	0	0	0	0	0	7	117
orf19.2710-T-E1	orf19.2710-T	orf19.2710-T		0	5	3	198	0	0	107	0	0	0	0	0	3	0	0	0	0	0	0	0	5	91
orf19.2711-T-E1	orf19.2711-T	orf19.2711-T		0	31	16	217	0	0	108	0	0	0	0	0	16	0	0	0	0	0	0	0	31	109
orf19.2711.1-T-E2	orf19.2711.1-T	orf19.2711.1-T		0	7	2	213	0	0	123	0	0	0	0	1	2	0	0	1	0	0	0	0	6	90
orf19.2712-T-E1	orf19.2712-T	orf19.2712-T		0	41	2	264	0	0	175	0	0	0	0	0	2	0	0	0	0	0	0	0	41	89
orf19.2713-T-E1	orf19.2713-T	orf19.2713-T		1	38	34	250	0	0	95	0	0	0	0	2	34	0	0	3	0	1	0	0	36	155
orf19.2715-T-E1	orf19.2715-T	orf19.2715-T		0	15	12	297	0	0	158	0	0	0	0	0	12	0	0	0	0	0	0	0	15	139
orf19.2717-T-E1	orf19.2717-T	orf19.2717-T		2	17	24	355	3	0	182	2	2	1	0	0	18	0	0	0	0	0	0	0	17	173
orf19.272-T-E1	orf19.272-T	orf19.272-T		0	25	2	272	0	0	122	0	0	0	0	0	2	0	0	0	0	0	0	0	25	150
orf19.2720-T-E1	orf19.2720-T	orf19.2720-T		0	20	3	396	0	0	167	0	0	0	0	0	3	0	0	0	0	0	0	0	20	229
orf19.2721-T-E1	orf19.2721-T	orf19.2721-T		2	13	16	370	0	0	243	2	0	0	0	0	16	0	0	0	0	0	0	0	13	127
orf19.2722-T-E1	orf19.2722-T	orf19.2722-T		2	23	17	378	0	0	243	0	0	0	0	0	17	0	0	0	0	2	0	0	23	135
orf19.2723-T-E1	orf19.2723-T	orf19.2723-T		5	7	6	406	1	1	174	5	0	0	0	0	4	0	0	0	0	0	0	0	7	232
orf19.2724-T-E1	orf19.2724-T	orf19.2724-T		3	28	31	448	4	6	240	2	0	2	0	0	19	0	0	0	0	1	0	0	28	208
orf19.2725-T-E1	orf19.2725-T	orf19.2725-T		4	2	7	415	0	0	210	4	0	0	0	0	7	0	0	0	0	0	0	0	2	205
orf19.2726-T-E1	orf19.2726-T	orf19.2726-T		1	19	6	408	0	0	215	0	0	0	0	0	6	0	0	1	0	0	1	0	19	193
orf19.2727-T-E1	orf19.2727-T	orf19.2727-T		0	11	5	427	0	0	232	0	0	0	0	0	5	0	0	0	0	0	0	0	11	195
orf19.2728-T-E1	orf19.2728-T	orf19.2728-T		2	30	21	444	1	0	195	2	0	0	0	0	20	0	0	0	0	0	0	0	30	249
orf19.273-T-E1	orf19.273-T	orf19.273-T		0	12	9	203	1	0	123	0	1	0	0	0	7	0	0	0	0	0	0	0	12	80
orf19.2730-T-E1	orf19.2730-T	orf19.2730-T		3	61	41	370	0	0	166	3	0	1	0	0	40	0	0	0	0	0	0	0	61	204
orf19.2731-T-E1	orf19.2731-T	orf19.2731-T		0	14	6	373	0	0	164	0	0	0	0	0	6	0	0	0	0	0	0	0	14	209
orf19.2733-T-E1	orf19.2733-T	orf19.2733-T		7	26	25	401	0	0	223	6	0	0	0	0	25	0	0	0	0	1	0	0	26	178
orf19.2734-T-E1	orf19.2734-T	orf19.2734-T		0	13	8	420	0	0	247	0	0	0	0	0	8	0	0	0	0	0	0	0	13	173
orf19.2735-T-E1	orf19.2735-T	orf19.2735-T		2	8	8	362	0	0	150	0	0	0	0	0	8	0	0	1	0	1	1	0	8	212
orf19.2736-T-E1	orf19.2736-T	orf19.2736-T		0	9	7	309	1	0	133	0	0	2	0	0	4	0	0	0	0	0	0	0	9	176
orf19.2737-T-E1	orf19.2737-T	orf19.2737-T		0	31	7	289	0	0	116	0	0	0	0	0	7	0	0	0	0	0	0	0	31	173
orf19.2738-T-E1	orf19.2738-T	orf19.2738-T		0	29	14	311	0	0	186	0	0	0	0	0	14	0	0	0	0	0	0	0	29	125
orf19.2739-T-E1	orf19.2739-T	orf19.2739-T		0	28	24	358	0	0	238	0	0	0	0	0	24	0	0	0	0	0	0	0	28	120
orf19.274-T-E1	orf19.274-T	orf19.274-T		0	17	20	220	2	2	69	0	0	0	0	0	16	0	0	0	0	0	0	0	17	151
orf19.2740-T-E1	orf19.2740-T	orf19.2740-T		1	32	52	392	0	0	264	0	0	0	0	0	52	0	0	0	0	1	0	0	32	128
orf19.2742-T-E1	orf19.2742-T	orf19.2742-T		0	16	6	413	0	0	170	0	0	0	0	0	6	0	0	0	0	0	0	0	16	243
orf19.2743-T-E1	orf19.2743-T	orf19.2743-T		3	57	35	397	0	0	197	3	0	1	0	0	34	0	0	0	0	0	0	0	57	200
orf19.2745-T-E1	orf19.2745-T	orf19.2745-T		1	27	22	442	0	0	178	0	0	0	0	0	22	0	0	0	0	1	0	0	27	264
orf19.2746-T-E1	orf19.2746-T	orf19.2746-T		0	15	4	517	0	0	253	0	0	0	0	0	4	0	0	0	0	0	0	0	15	264
orf19.2747-T-E1	orf19.2747-T	orf19.2747-T		9	34	89	448	15	20	201	8	9	3	0	0	42	0	0	0	0	1	0	0	34	247
orf19.2748-T-E1	orf19.2748-T	orf19.2748-T		19	32	46	370	6	7	238	19	5	0	0	0	28	0	0	1	0	0	0	1	31	132
orf19.2749-T-E1	orf19.2749-T	orf19.2749-T		0	14	12	404	2	1	223	0	1	0	0	0	8	0	0	0	0	0	0	0	14	181
orf19.275-T-E1	orf19.275-T	orf19.275-T		0	0	3	155	0	0	67	0	0	0	0	0	3	0	0	0	0	0	0	0	0	88
orf19.2751-T-E1	orf19.2751-T	orf19.2751-T		0	18	14	373	2	3	134	0	0	0	0	0	9	0	0	0	0	0	0	0	18	239
orf19.2752-T-E1	orf19.2752-T	orf19.2752-T		4	88	64	464	6	5	228	4	1	1	0	0	51	0	0	0	0	0	0	0	88	236
orf19.2753-T-E1	orf19.2753-T	orf19.2753-T		0	63	31	401	2	0	200	0	1	1	0	0	27	0	0	0	0	0	0	0	63	201
orf19.2754-T-E1	orf19.2754-T	orf19.2754-T		2	8	3	375	0	0	144	2	2	1	0	0	0	0	0	0	0	0	0	0	8	231
orf19.2755-T-E1	orf19.2755-T	orf19.2755-T		0	8	1	378	0	0	153	0	0	0	0	0	1	0	0	0	0	0	0	0	8	225
orf19.2756-T-E1	orf19.2756-T	orf19.2756-T		0	8	0	370	0	0	228	0	0	0	0	0	0	0	0	0	0	0	0	0	8	142
orf19.2757-T-E1	orf19.2757-T	orf19.2757-T		0	9	7	359	0	0	230	0	0	0	0	0	7	0	0	0	0	0	0	0	9	129
orf19.2758-T-E1	orf19.2758-T	orf19.2758-T		4	9	26	266	1	0	111	4	0	2	0	0	23	0	0	0	0	0	0	0	9	155
orf19.276-T-E1	orf19.276-T	orf19.276-T		0	11	14	154	0	0	80	0	0	0	0	0	14	0	0	0	0	0	0	0	11	74
orf19.2760-T-E1	orf19.2760-T	orf19.2760-T		0	42	28	336	1	4	143	0	0	0	0	0	23	0	0	0	0	0	0	0	42	193
orf19.2761-T-E1	orf19.2761-T	orf19.2761-T		1	11	9	292	1	0	184	0	1	1	0	0	6	0	0	0	0	1	0	0	11	108
orf19.2762-T-E1	orf19.2762-T	orf19.2762-T		0	6	0	322	0	0	162	0	0	0	0	0	0	0	0	0	0	0	0	0	6	160
orf19.2763-T-E1	orf19.2763-T	orf19.2763-T		3	24	40	348	1	4	178	3	2	5	0	0	28	0	0	0	0	0	0	0	24	170
orf19.2765-T-E1	orf19.2765-T	orf19.2765-T		0	8	7	346	0	0	162	0	0	0	0	0	7	0	0	0	0	0	0	0	8	184
orf19.2766-T-E1	orf19.2766-T	orf19.2766-T		4	3	3	341	0	0	160	3	0	0	0	0	3	0	0	0	0	1	0	0	3	181
orf19.2767-T-E1	orf19.2767-T	orf19.2767-T		0	7	3	329	0	0	144	0	0	0	0	0	3	0	0	0	0	0	0	0	7	185
orf19.2768-T-E1	orf19.2768-T	orf19.2768-T		2	24	18	408	1	1	198	2	0	0	0	0	16	0	0	0	0	0	0	0	24	210
orf19.2769-T-E1	orf19.2769-T	orf19.2769-T		0	5	6	307	0	1	130	0	0	0	0	0	5	0	0	0	0	0	0	0	5	177
orf19.277-T-E1	orf19.277-T	orf19.277-T		0	2	6	164	0	0	83	0	0	0	0	0	6	0	0	0	0	0	0	0	2	81
orf19.2770-T-E1	orf19.2770-T	orf19.2770-T		0	5	8	284	0	0	167	0	0	0	0	0	8	0	0	0	0	0	0	0	5	117
orf19.2770.1-T-E2	orf19.2770.1-T	orf19.2770.1-T		0	6	1	322	0	0	150	0	0	0	0	7	1	0	0	1	0	0	0	0	5	166
orf19.2771-T-E1	orf19.2771-T	orf19.2771-T		1	49	24	362	0	3	193	0	1	1	0	0	19	0	0	0	0	1	0	0	49	169
orf19.2772-T-E1	orf19.2772-T	orf19.2772-T		0	31	12	311	0	0	153	0	1	0	0	0	11	0	0	0	0	0	0	0	31	158
orf19.2774-T-E1	orf19.2774-T	orf19.2774-T		0	25	6	330	0	0	160	0	0	0	0	0	6	0	0	0	0	0	0	0	25	170
orf19.2775-T-E1	orf19.2775-T	orf19.2775-T		0	14	4	336	0	0	166	0	0	0	0	0	4	0	0	0	0	0	0	0	14	170
orf19.2778-T-E1	orf19.2778-T	orf19.2778-T		2	10	14	389	1	0	170	1	0	0	0	0	13	0	0	0	0	1	0	0	10	219
orf19.2779-T-E1	orf19.2779-T	orf19.2779-T		0	4	15	360	0	0	133	0	0	0	0	0	15	0	0	0	0	0	0	0	4	227
orf19.278-T-E1	orf19.278-T	orf19.278-T		0	9	2	152	0	0	67	0	0	0	0	0	2	0	0	0	0	0	0	0	9	85
orf19.2781-T-E1	orf19.2781-T	orf19.2781-T		6	19	68	408	4	6	179	6	6	9	0	0	43	0	0	0	0	0	0	0	19	229
orf19.2782-T-E1	orf19.2782-T	orf19.2782-T		0	2	4	390	0	3	211	0	0	1	0	0	0	0	0	0	0	0	0	0	2	179
orf19.2783-T-E1	orf19.2783-T	orf19.2783-T		0	14	25	332	2	0	142	0	3	4	0	0	16	0	0	0	0	0	0	0	14	190
orf19.2784-T-E1	orf19.2784-T	orf19.2784-T		0	9	15	325	0	0	135	0	1	1	0	0	13	0	0	0	0	0	0	0	9	190
orf19.2785-T-E1	orf19.2785-T	orf19.2785-T		0	6	2	332	0	0	179	0	0	0	0	0	2	0	0	0	0	0	0	0	6	153
orf19.2786-T-E1	orf19.2786-T	orf19.2786-T		6	38	19	415	0	1	242	6	2	3	0	0	13	0	0	0	0	0	0	0	38	173
orf19.2787-T-E1	orf19.2787-T	orf19.2787-T		4	28	37	375	10	1	222	4	4	3	0	0	19	0	0	0	0	0	0	0	28	153
orf19.2788-T-E1	orf19.2788-T	orf19.2788-T		1	28	28	412	0	0	201	0	0	0	0	0	28	0	0	0	0	1	0	0	28	211
orf19.2789-T-E1	orf19.2789-T	orf19.2789-T		0	9	12	447	0	0	245	0	0	0	0	0	12	0	0	0	0	0	0	0	9	202
orf19.279-T-E1	orf19.279-T	orf19.279-T		0	7	4	136	0	0	69	0	0	0	0	0	4	0	0	0	0	0	0	0	7	67
orf19.2790-T-E1	orf19.2790-T	orf19.2790-T		0	15	8	511	0	0	258	0	0	0	0	0	8	0	0	0	0	0	0	0	15	253
orf19.2791-T-E1	orf19.2791-T	orf19.2791-T		4	39	55	429	3	1	209	4	1	3	0	0	47	0	0	0	0	0	0	0	39	220
orf19.2792-T-E1	orf19.2792-T	orf19.2792-T		0	39	23	393	0	1	142	0	0	2	0	0	20	0	0	0	0	0	0	0	39	251
orf19.2794-T-E1	orf19.2794-T	orf19.2794-T		1	9	8	340	0	0	175	1	0	0	0	0	8	0	0	0	0	0	0	0	9	165
orf19.2795-T-E1	orf19.2795-T	orf19.2795-T		2	18	8	318	1	0	177	2	0	0	0	0	7	0	0	0	0	0	0	0	18	141
orf19.2796-T-E1	orf19.2796-T	orf19.2796-T		0	17	10	332	0	0	183	0	0	0	0	0	10	0	0	0	0	0	0	0	17	149
orf19.2797-T-E1	orf19.2797-T	orf19.2797-T		2	45	44	300	0	0	159	2	0	3	0	0	41	0	0	0	0	0	0	0	45	141
orf19.2798-T-E1	orf19.2798-T	orf19.2798-T		0	29	21	329	0	0	143	0	0	0	0	0	21	0	0	0	0	0	0	0	29	186
orf19.2799-T-E1	orf19.2799-T	orf19.2799-T		0	23	6	322	0	0	144	0	0	0	0	0	6	0	0	0	0	0	0	0	23	178
orf19.28-T-E1	orf19.28-T	orf19.28-T		0	8	6	248	0	0	141	0	0	0	0	0	6	0	0	0	0	0	0	0	8	107
orf19.280-T-E1	orf19.280-T	orf19.280-T		0	2	2	141	0	0	73	0	0	0	0	0	2	0	0	0	0	0	0	0	2	68
orf19.2800-T-E1	orf19.2800-T	orf19.2800-T		2	0	1	401	0	0	233	1	0	0	0	0	1	0	0	1	0	0	1	0	0	168
orf19.2803-T-E1	orf19.2803-T	orf19.2803-T		1	8	2	213	0	0	111	0	0	0	0	0	2	0	0	0	0	1	0	0	8	102
orf19.2804-T-E1	orf19.2804-T	orf19.2804-T		0	13	11	225	0	0	124	0	0	0	0	2	11	0	0	0	0	0	0	0	13	99
orf19.2805-T-E1	orf19.2805-T	orf19.2805-T		0	16	12	225	0	0	103	0	0	0	0	0	12	0	0	0	0	0	0	0	16	122
orf19.2808-T-E1	orf19.2808-T	orf19.2808-T		4	23	21	175	1	2	75	4	1	0	0	0	17	0	0	0	0	0	0	0	23	100
orf19.2809-T-E1	orf19.2809-T	orf19.2809-T		0	14	5	169	0	0	64	0	1	0	0	0	4	0	0	1	0	0	0	1	13	105
orf19.281-T-E1	orf19.281-T	orf19.281-T		0	7	12	121	1	1	50	0	0	0	0	0	10	0	0	0	0	0	0	0	7	71
orf19.2810-T-E1	orf19.2810-T	orf19.2810-T		0	14	8	265	0	0	207	0	0	0	0	0	8	0	0	0	0	0	0	0	14	58
orf19.2812-T-E1	orf19.2812-T	orf19.2812-T		0	12	12	320	0	0	257	0	0	2	0	0	10	0	0	0	0	0	0	0	12	63
orf19.2813-T-E1	orf19.2813-T	orf19.2813-T		0	3	12	321	0	0	75	0	0	0	0	0	12	0	0	0	0	0	0	0	3	246
orf19.2818-T-E1	orf19.2818-T	orf19.2818-T		4	30	32	256	0	0	162	3	1	0	0	0	31	0	0	0	1	0	0	0	30	94
orf19.2819-T-E1	orf19.2819-T	orf19.2819-T		0	3	13	215	0	1	101	0	0	0	0	0	12	0	0	0	0	0	0	0	3	114
orf19.2820-T-E1	orf19.2820-T	orf19.2820-T		0	7	12	251	4	0	102	0	2	2	0	0	4	0	0	0	0	0	0	0	7	149
orf19.2821-T-E1	orf19.2821-T	orf19.2821-T		0	4	2	262	0	0	103	0	0	0	0	0	2	0	0	0	0	0	0	0	4	159
orf19.2822-T-E1	orf19.2822-T	orf19.2822-T		0	6	5	279	0	0	101	0	0	0	0	0	5	0	0	0	0	0	0	0	6	178
orf19.2823-T-E1	orf19.2823-T	orf19.2823-T		1	21	26	514	3	4	262	0	5	3	0	0	11	0	0	0	0	1	0	0	21	252
orf19.2825-T-E1	orf19.2825-T	orf19.2825-T		0	7	23	506	6	1	278	0	3	6	0	0	7	0	0	0	0	0	0	0	7	228
orf19.2826-T-E1	orf19.2826-T	orf19.2826-T		2	9	31	380	3	1	235	2	1	8	0	0	18	0	0	0	0	0	0	0	9	145
orf19.2827-T-E1	orf19.2827-T	orf19.2827-T		0	12	31	357	7	2	142	0	9	7	0	0	6	0	0	0	0	0	0	0	12	215
orf19.2828-T-E1	orf19.2828-T	orf19.2828-T		2	9	12	310	0	0	165	2	1	4	0	0	7	0	0	0	0	0	0	0	9	145
orf19.2829-T-E1	orf19.2829-T	orf19.2829-T		0	0	3	342	0	0	191	0	0	0	0	0	3	0	0	0	0	0	0	0	0	151
orf19.2830-T-E1	orf19.2830-T	orf19.2830-T		0	12	10	369	1	1	227	0	0	0	0	0	8	0	0	0	0	0	0	0	12	142
orf19.2831-T-E1	orf19.2831-T	orf19.2831-T		2	4	10	364	2	0	138	2	1	0	0	0	7	0	0	0	0	0	0	0	4	226
orf19.2832-T-E1	orf19.2832-T	orf19.2832-T		0	28	16	452	0	0	222	0	0	0	0	0	16	0	0	0	0	0	0	0	28	230
orf19.2833-T-E1	orf19.2833-T	orf19.2833-T		2	8	12	398	2	1	186	2	0	0	0	0	9	0	0	0	0	0	0	0	8	212
orf19.2834-T-E1	orf19.2834-T	orf19.2834-T		2	19	6	381	2	0	227	2	0	0	0	0	4	0	0	0	0	0	0	0	19	154
orf19.2835-T-E1	orf19.2835-T	orf19.2835-T		2	10	22	369	3	0	219	2	0	3	0	0	16	0	0	0	0	0	0	0	10	150
orf19.2836-T-E1	orf19.2836-T	orf19.2836-T		0	3	4	364	0	0	175	0	0	0	0	0	4	0	0	0	0	0	0	0	3	189
orf19.2837-T-E1	orf19.2837-T	orf19.2837-T		0	9	7	422	0	0	158	0	0	0	0	0	7	0	0	0	0	0	0	0	9	264
orf19.2838-T-E1	orf19.2838-T	orf19.2838-T		1	33	46	386	0	0	148	0	0	0	0	0	46	0	0	0	0	1	0	0	33	238
orf19.2839-T-E1	orf19.2839-T	orf19.2839-T		11	61	74	292	0	5	148	11	0	0	0	0	69	0	0	0	0	0	0	0	61	144
orf19.284-T-E1	orf19.284-T	orf19.284-T		0	4	3	123	0	0	44	0	0	0	0	0	3	0	0	0	0	0	0	0	4	79
orf19.2841-T-E1	orf19.2841-T	orf19.2841-T		0	20	3	441	0	0	175	0	0	0	0	0	3	0	0	0	0	0	0	0	20	266
orf19.2842-T-E1	orf19.2842-T	orf19.2842-T		0	18	36	381	4	7	222	0	1	7	0	0	17	0	0	0	0	0	0	0	18	159
orf19.2843-T-E1	orf19.2843-T	orf19.2843-T		0	2	0	322	0	0	154	0	0	0	0	0	0	0	0	0	0	0	0	0	2	168
orf19.2844-T-E1	orf19.2844-T	orf19.2844-T		2	27	11	438	0	1	283	2	0	0	0	0	10	0	0	0	0	0	0	0	27	155
orf19.2846-T-E1	orf19.2846-T	orf19.2846-T		0	7	2	406	0	0	297	0	0	0	0	0	2	0	0	0	0	0	0	0	7	109
orf19.2847-T-E1	orf19.2847-T	orf19.2847-T		2	35	11	404	0	0	146	2	0	0	0	0	11	0	0	0	0	0	0	0	35	258
orf19.2847.1-T-E1	orf19.2847.1-T	orf19.2847.1-T		18	24	30	376	0	1	193	15	0	0	0	0	29	0	0	0	0	3	1	0	24	183
orf19.2848-T-E1	orf19.2848-T	orf19.2848-T		1	36	15	521	2	3	250	0	0	0	0	0	10	0	0	0	0	1	0	0	36	271
orf19.2849-T-E1	orf19.2849-T	orf19.2849-T		0	14	1	458	0	0	157	0	0	0	0	0	1	0	0	0	0	0	0	0	14	301
orf19.285-T-E1	orf19.285-T	orf19.285-T		0	0	0	141	0	0	56	0	0	0	0	0	0	0	0	0	0	0	0	0	0	85
orf19.2850-T-E1	orf19.2850-T	orf19.2850-T		11	105	196	376	8	5	84	9	1	3	0	0	179	0	0	0	0	2	0	0	105	292
orf19.2851-T-E1	orf19.2851-T	orf19.2851-T		0	14	1	368	0	0	284	0	0	0	0	0	1	0	0	0	0	0	0	0	14	84
orf19.2852-T-E1	orf19.2852-T	orf19.2852-T		0	6	1	273	0	0	198	0	0	0	0	0	1	0	0	0	0	0	0	0	6	75
orf19.2853-T-E1	orf19.2853-T	orf19.2853-T		0	12	8	268	1	0	107	0	0	0	0	0	7	0	0	0	0	0	0	0	12	161
orf19.2857-T-E1	orf19.2857-T	orf19.2857-T		0	20	6	249	0	0	125	0	0	0	0	0	6	0	0	0	0	0	0	0	20	124
orf19.2859-T-E1	orf19.2859-T	orf19.2859-T		6	16	26	184	3	0	74	6	0	1	0	0	22	0	0	0	0	0	0	0	16	110
orf19.286-T-E1	orf19.286-T	orf19.286-T		1	1	7	133	0	0	49	0	0	0	0	0	7	0	0	0	0	1	0	0	1	84
orf19.2862-T-E1	orf19.2862-T	orf19.2862-T		0	13	1	217	0	0	115	0	0	0	0	0	1	0	0	0	0	0	0	0	13	102
orf19.2863-T-E1	orf19.2863-T	orf19.2863-T		0	3	3	247	0	0	126	0	0	0	0	0	3	0	0	0	0	0	0	0	3	121
orf19.2863.1-T-E2	orf19.2863.1-T	orf19.2863.1-T		0	8	5	253	0	0	126	0	0	0	0	2	5	0	0	0	0	0	0	0	8	125
orf19.2864.1-T-E2	orf19.2864.1-T	orf19.2864.1-T		0	2	0	255	0	0	103	0	0	0	0	17	0	0	0	0	0	0	0	0	2	135
orf19.2866-T-E1	orf19.2866-T	orf19.2866-T		0	5	6	194	0	0	98	0	0	0	0	0	6	0	0	0	0	0	0	0	5	96
orf19.2867-T-E1	orf19.2867-T	orf19.2867-T		0	15	14	186	1	0	76	0	0	0	0	0	13	0	0	0	0	0	0	0	15	110
orf19.2868-T-E1	orf19.2868-T	orf19.2868-T		0	7	4	177	0	0	97	0	0	0	0	0	4	0	0	0	0	0	0	0	7	80
orf19.2869-T-E1	orf19.2869-T	orf19.2869-T		0	3	4	191	0	0	103	0	0	0	0	0	4	0	0	0	0	0	0	0	3	88
orf19.287-T-E1	orf19.287-T	orf19.287-T		0	3	1	135	0	0	84	0	0	0	0	0	1	0	0	0	0	0	0	0	3	51
orf19.2870-T-E1	orf19.2870-T	orf19.2870-T		0	2	4	205	0	0	106	0	0	0	0	0	4	0	0	0	0	0	0	0	2	99
orf19.2871-T-E1	orf19.2871-T	orf19.2871-T		0	20	1	206	0	0	91	0	0	0	0	0	1	0	0	0	0	0	0	0	20	115
orf19.2873-T-E1	orf19.2873-T	orf19.2873-T		0	55	21	203	0	0	98	0	0	0	0	0	21	0	0	0	0	0	0	0	55	105
orf19.2875-T-E1	orf19.2875-T	orf19.2875-T		1	3	2	209	0	0	91	0	0	0	0	0	2	0	0	0	0	1	0	0	3	118
orf19.2876-T-E1	orf19.2876-T	orf19.2876-T		0	5	2	252	0	0	84	0	0	0	0	6	2	0	0	0	0	0	0	0	5	162
orf19.2877-T-E1	orf19.2877-T	orf19.2877-T		0	14	6	318	0	0	207	0	0	0	0	0	6	0	0	0	0	0	0	0	14	111
orf19.2878-T-E1	orf19.2878-T	orf19.2878-T		0	8	9	348	0	0	118	0	0	0	0	0	9	0	0	0	0	0	0	0	8	230
orf19.2879-T-E1	orf19.2879-T	orf19.2879-T		6	70	78	333	2	0	153	5	0	2	0	0	74	0	0	0	0	1	0	0	70	180
orf19.288-T-E1	orf19.288-T	orf19.288-T		0	7	4	137	0	0	62	0	0	0	0	0	4	0	0	0	0	0	0	0	7	75
orf19.2881-T-E1	orf19.2881-T	orf19.2881-T		1	24	23	423	2	1	204	1	0	2	0	0	18	0	0	0	0	0	0	0	24	219
orf19.2882-T-E1	orf19.2882-T	orf19.2882-T		1	10	1	331	0	0	124	0	0	0	0	0	1	0	0	0	0	1	0	0	10	207
orf19.2883-T-E1	orf19.2883-T	orf19.2883-T		0	8	9	228	1	0	73	0	1	0	0	0	7	0	0	0	0	0	0	0	8	155
orf19.2884-T-E1	orf19.2884-T	orf19.2884-T		2	12	19	303	1	2	128	2	3	2	0	0	11	0	0	0	0	0	0	0	12	175
orf19.2885-T-E1	orf19.2885-T	orf19.2885-T		7	8	22	278	2	0	195	7	7	2	0	0	11	0	0	0	0	0	0	0	8	83
orf19.2886-T-E1	orf19.2886-T	orf19.2886-T		2	8	16	402	5	3	224	2	2	2	0	0	4	0	0	0	0	0	0	0	8	178
orf19.2887-T-E1	orf19.2887-T	orf19.2887-T		1	5	4	416	1	1	203	0	0	0	0	0	2	0	0	0	0	1	0	0	5	213
orf19.2888-T-E1	orf19.2888-T	orf19.2888-T		1	6	17	389	1	1	181	1	5	1	0	0	9	0	0	1	0	0	1	0	6	208
orf19.2889-T-E1	orf19.2889-T	orf19.2889-T		0	3	0	381	0	0	197	0	0	0	0	0	0	0	0	0	0	0	0	0	3	184
orf19.2890-T-E1	orf19.2890-T	orf19.2890-T		2	6	16	383	1	4	168	2	1	1	0	0	9	0	0	0	0	0	0	0	6	215
orf19.2891-T-E1	orf19.2891-T	orf19.2891-T		7	11	20	392	3	1	181	6	4	2	0	0	10	0	0	0	0	1	0	0	11	211
orf19.2892-T-E1	orf19.2892-T	orf19.2892-T		7	26	36	354	5	8	181	7	0	0	0	0	23	0	0	0	0	0	0	0	26	173
orf19.2893-T-E1	orf19.2893-T	orf19.2893-T		0	22	30	352	0	0	188	0	0	3	0	0	27	0	0	0	0	0	0	0	22	164
orf19.2895-T-E1	orf19.2895-T	orf19.2895-T		0	12	1	340	0	0	175	0	0	0	0	0	1	0	0	0	0	0	0	0	12	165
orf19.2896-T-E1	orf19.2896-T	orf19.2896-T		2	13	5	313	0	0	153	2	0	0	0	0	5	0	0	0	0	0	0	0	13	160
orf19.2897-T-E1	orf19.2897-T	orf19.2897-T		0	8	4	300	0	0	142	0	0	0	0	0	4	0	0	0	0	0	0	0	8	158
orf19.2898-T-E1	orf19.2898-T	orf19.2898-T		0	11	5	341	0	0	160	0	0	0	0	0	5	0	0	0	0	0	0	0	11	181
orf19.2899-T-E1	orf19.2899-T	orf19.2899-T		1	12	15	277	0	0	133	0	0	0	0	0	15	0	0	0	0	1	0	0	12	144
orf19.29-T-E1	orf19.29-T	orf19.29-T		0	4	10	247	0	0	84	0	0	0	0	0	10	0	0	0	0	0	0	0	4	163
orf19.290-T-E1	orf19.290-T	orf19.290-T		0	23	36	127	0	0	52	0	1	0	0	0	35	0	0	0	0	0	0	0	23	75
orf19.2901-T-E1	orf19.2901-T	orf19.2901-T		0	14	45	366	9	2	208	0	4	1	0	0	29	0	0	0	0	0	0	0	14	158
orf19.2903-T-E1	orf19.2903-T	orf19.2903-T		0	23	17	413	0	0	147	0	0	0	0	0	17	0	0	0	0	0	0	0	23	266
orf19.2905-T-E1	orf19.2905-T	orf19.2905-T		0	5	9	494	0	0	277	0	0	0	0	0	9	0	0	0	0	0	0	0	5	217
orf19.2906-T-E1	orf19.2906-T	orf19.2906-T		0	7	31	522	1	0	298	0	4	3	0	0	23	0	0	0	0	0	0	0	7	224
orf19.2907-T-E1	orf19.2907-T	orf19.2907-T		1	16	35	512	0	3	244	0	0	1	0	0	31	0	0	1	0	1	0	1	15	268
orf19.2907.1-T-E1	orf19.2907.1-T	orf19.2907.1-T		0	3	4	499	0	0	269	0	0	0	0	0	4	0	0	0	0	0	0	0	3	230
orf19.2908-T-E1	orf19.2908-T	orf19.2908-T		2	34	11	445	0	0	180	1	0	0	0	0	11	0	0	2	0	1	0	1	33	265
orf19.2909-T-E1	orf19.2909-T	orf19.2909-T		0	23	6	450	0	0	153	0	0	0	0	0	6	0	0	0	0	0	0	0	23	297
orf19.291-T-E1	orf19.291-T	orf19.291-T		1	1	5	147	0	0	75	1	0	0	0	0	5	0	0	0	0	0	0	0	1	72
orf19.2910-T-E1	orf19.2910-T	orf19.2910-T		0	14	4	439	0	0	278	0	0	0	0	0	4	0	0	0	0	0	0	0	14	161
orf19.2911-T-E1	orf19.2911-T	orf19.2911-T		0	34	17	371	4	0	128	0	0	0	0	0	13	0	0	0	0	0	0	0	34	243
orf19.2914-T-E1	orf19.2914-T	orf19.2914-T		0	20	17	278	0	0	154	0	0	0	0	0	17	0	0	0	0	0	0	0	20	124
orf19.2915-T-E1	orf19.2915-T	orf19.2915-T		1	34	13	281	0	0	122	0	0	0	0	0	13	0	0	0	0	1	0	0	34	159
orf19.2916-T-E1	orf19.2916-T	orf19.2916-T		0	8	8	238	0	0	113	0	0	1	0	0	7	0	0	0	0	0	0	0	8	125
orf19.2917-T-E1	orf19.2917-T	orf19.2917-T		0	32	7	262	1	0	137	0	0	0	0	0	6	0	0	0	0	0	0	0	32	125
orf19.2917.1-T-E1	orf19.2917.1-T	orf19.2917.1-T		0	2	4	252	0	0	118	0	0	0	0	0	4	0	0	0	0	0	0	0	2	134
orf19.2919-T-E1	orf19.2919-T	orf19.2919-T		0	56	30	278	1	0	159	0	1	0	0	0	28	0	0	0	0	0	0	0	56	119
orf19.292-T-E1	orf19.292-T	orf19.292-T		0	4	3	147	0	0	66	0	0	0	0	0	3	0	0	0	0	0	0	0	4	81
orf19.2920-T-E1	orf19.2920-T	orf19.2920-T		0	6	1	275	0	0	139	0	0	0	0	0	1	0	0	0	0	0	0	0	6	136
orf19.2921-T-E1	orf19.2921-T	orf19.2921-T		0	27	23	235	0	0	129	0	0	0	0	0	23	0	0	0	0	0	0	0	27	106
orf19.2922-T-E4	orf19.2922-T	orf19.2922-T		0	9	15	244	0	0	86	0	0	0	0	7	15	0	0	0	0	0	0	0	9	151
orf19.2923-T-E1	orf19.2923-T	orf19.2923-T		0	19	2	240	0	0	76	0	0	0	0	0	2	0	0	0	0	0	0	0	19	164
orf19.2925-T-E1	orf19.2925-T	orf19.2925-T		2	1	10	369	0	2	225	2	0	2	0	0	6	0	0	0	0	0	0	0	1	144
orf19.2926-T-E1	orf19.2926-T	orf19.2926-T		6	16	41	370	7	8	147	6	2	4	0	0	20	0	0	0	0	0	0	0	16	223
orf19.2927-T-E1	orf19.2927-T	orf19.2927-T		0	3	7	327	0	2	210	0	0	0	0	0	5	0	0	1	0	0	0	1	2	117
orf19.2928-T-E1	orf19.2928-T	orf19.2928-T		0	8	11	215	0	0	146	0	2	2	0	0	7	0	0	0	0	0	0	0	8	69
orf19.2929-T-E1	orf19.2929-T	orf19.2929-T		0	38	5	357	0	0	165	0	0	0	0	0	5	0	0	0	0	0	0	0	38	192
orf19.2930-T-E1	orf19.2930-T	orf19.2930-T		0	16	16	367	0	1	182	0	5	2	0	0	8	0	0	0	0	0	0	0	16	185
orf19.2933-T-E1	orf19.2933-T	orf19.2933-T		0	8	5	371	0	0	166	0	0	0	0	0	5	0	0	0	0	0	0	0	8	205
orf19.2934-T-E1	orf19.2934-T	orf19.2934-T		0	5	7	311	0	0	152	0	0	0	0	0	7	0	0	0	0	0	0	0	5	159
orf19.2935-T-E1	orf19.2935-T	orf19.2935-T		0	11	0	314	0	0	162	0	0	0	0	0	0	0	0	0	0	0	0	0	11	152
orf19.2936-T-E1	orf19.2936-T	orf19.2936-T		0	4	2	333	0	0	149	0	1	0	0	0	1	0	0	0	0	0	0	0	4	184
orf19.2937-T-E1	orf19.2937-T	orf19.2937-T		0	3	0	372	0	0	167	0	0	0	0	0	0	0	0	0	0	0	0	0	3	205
orf19.2938-T-E1	orf19.2938-T	orf19.2938-T		0	21	32	341	1	0	162	0	0	0	0	0	31	0	0	0	0	0	0	0	21	179
orf19.2939-T-E1	orf19.2939-T	orf19.2939-T		2	11	1	336	0	0	188	2	0	0	0	0	1	0	0	0	0	0	0	0	11	148
orf19.2940-T-E1	orf19.2940-T	orf19.2940-T		0	6	6	331	0	2	183	0	0	0	0	0	4	0	0	0	0	0	0	0	6	148
orf19.2941-T-E1	orf19.2941-T	orf19.2941-T		4	23	20	368	1	0	189	4	3	2	0	0	14	0	0	0	0	0	0	0	23	179
orf19.2942-T-E1	orf19.2942-T	orf19.2942-T		0	22	6	381	0	0	187	0	0	0	0	0	6	0	0	0	0	0	0	0	22	194
orf19.2943.5-T-E1	orf19.2943.5-T	orf19.2943.5-T		3	6	7	340	0	0	149	1	0	0	0	0	7	0	0	1	0	1	1	0	6	191
orf19.2945-T-E1	orf19.2945-T	orf19.2945-T		0	17	10	377	0	0	193	0	0	0	0	0	10	0	0	0	0	0	0	0	17	184
orf19.2946-T-E1	orf19.2946-T	orf19.2946-T		0	27	23	342	0	0	143	0	0	0	0	0	23	0	0	0	0	0	0	0	27	199
orf19.2947-T-E1	orf19.2947-T	orf19.2947-T		0	9	2	317	0	0	180	0	0	0	0	0	2	0	0	0	0	0	0	0	9	137
orf19.2948-T-E1	orf19.2948-T	orf19.2948-T		0	12	13	264	0	0	81	0	0	0	0	0	13	0	0	0	0	0	0	0	12	183
orf19.2949-T-E1	orf19.2949-T	orf19.2949-T		0	54	19	277	0	0	114	0	0	0	0	0	19	0	0	0	0	0	0	0	54	163
orf19.295-T-E1	orf19.295-T	orf19.295-T		0	7	12	134	1	0	68	0	0	1	0	0	10	0	0	0	0	0	0	0	7	66
orf19.2951-T-E1	orf19.2951-T	orf19.2951-T		0	6	5	222	0	0	94	0	0	0	0	0	5	0	0	0	0	0	0	0	6	128
orf19.2952-T-E1	orf19.2952-T	orf19.2952-T		0	20	15	205	0	0	86	0	0	0	0	0	15	0	0	0	0	0	0	0	20	119
orf19.2953-T-E1	orf19.2953-T	orf19.2953-T		0	4	1	236	0	0	104	0	0	0	0	0	1	0	0	0	0	0	0	0	4	132
orf19.2954-T-E1	orf19.2954-T	orf19.2954-T		0	6	4	253	0	0	140	0	0	0	0	0	4	0	0	0	0	0	0	0	6	113
orf19.2956-T-E1	orf19.2956-T	orf19.2956-T		0	8	6	248	0	0	118	0	0	0	0	0	6	0	0	0	0	0	0	0	8	130
orf19.2957-T-E1	orf19.2957-T	orf19.2957-T		1	39	27	248	0	0	128	0	0	0	0	0	27	0	0	0	0	1	0	0	39	120
orf19.2958-T-E1	orf19.2958-T	orf19.2958-T		2	15	31	264	0	0	143	2	0	0	0	0	31	0	0	0	0	0	0	0	15	121
orf19.2959-T-E1	orf19.2959-T	orf19.2959-T		1	4	2	238	0	0	128	1	0	0	0	0	2	0	0	0	0	0	0	0	4	110
orf19.2959.1-T-E1	orf19.2959.1-T	orf19.2959.1-T		0	1	0	219	0	0	113	0	0	0	0	0	0	0	0	0	0	0	0	0	1	106
orf19.296-T-E1	orf19.296-T	orf19.296-T		0	2	2	143	0	0	62	0	0	0	0	0	2	0	0	0	0	0	0	0	2	81
orf19.2960-T-E1	orf19.2960-T	orf19.2960-T		1	13	7	306	0	0	175	1	0	0	0	0	7	0	0	0	0	0	0	0	13	131
orf19.2961-T-E1	orf19.2961-T	orf19.2961-T		0	10	6	292	0	0	183	0	0	0	0	0	6	0	0	0	0	0	0	0	10	109
orf19.2962-T-E1	orf19.2962-T	orf19.2962-T		0	5	10	235	0	0	69	0	0	0	0	0	10	0	0	0	0	0	0	0	5	166
orf19.2963-T-E1	orf19.2963-T	orf19.2963-T		0	12	5	195	0	0	141	0	0	0	0	0	5	0	0	0	0	0	0	0	12	54
orf19.2964-T-E1	orf19.2964-T	orf19.2964-T		0	22	4	161	0	0	108	0	0	0	0	0	4	0	0	0	0	0	0	0	22	53
orf19.2965-T-E1	orf19.2965-T	orf19.2965-T		0	4	0	156	0	0	86	0	0	0	0	0	0	0	0	0	0	0	0	0	4	70
orf19.2965.1-T-E1	orf19.2965.1-T	orf19.2965.1-T		0	0	0	151	0	0	88	0	0	0	0	0	0	0	0	0	0	0	0	0	0	63
orf19.2966-T-E1	orf19.2966-T	orf19.2966-T		0	4	1	137	0	0	80	0	0	0	0	0	1	0	0	0	0	0	0	0	4	57
orf19.2967-T-E1	orf19.2967-T	orf19.2967-T		0	5	1	136	0	0	87	0	0	0	0	0	1	0	0	0	0	0	0	0	5	49
orf19.2968-T-E1	orf19.2968-T	orf19.2968-T		3	6	16	120	0	0	63	3	2	0	0	0	14	0	0	0	0	0	0	0	6	57
orf19.2969-T-E1	orf19.2969-T	orf19.2969-T		0	17	6	175	0	1	89	0	0	0	0	0	5	0	0	0	0	0	0	0	17	86
orf19.297-T-E2	orf19.297-T	orf19.297-T		0	8	3	138	0	0	83	0	0	0	0	1	3	0	0	0	0	0	0	0	8	54
orf19.2970-T-E1	orf19.2970-T	orf19.2970-T		0	38	24	184	0	0	98	0	0	0	0	0	24	0	0	0	0	0	0	0	38	86
orf19.2971-T-E1	orf19.2971-T	orf19.2971-T		0	9	14	179	0	2	86	0	0	0	0	0	12	0	0	0	0	0	0	0	9	93
orf19.2972-T-E1	orf19.2972-T	orf19.2972-T		0	7	6	154	2	0	54	0	0	0	0	0	4	0	0	0	0	0	0	0	7	100
orf19.2973-T-E1	orf19.2973-T	orf19.2973-T		0	4	5	147	0	0	62	0	1	0	0	0	4	0	0	0	0	0	0	0	4	85
orf19.2974-T-E1	orf19.2974-T	orf19.2974-T		0	3	0	117	0	0	54	0	0	0	0	0	0	0	0	0	0	0	0	0	3	63
orf19.2975-T-E1	orf19.2975-T	orf19.2975-T		0	4	2	136	0	0	81	0	0	0	0	0	2	0	0	0	0	0	0	0	4	55
orf19.2977-T-E1	orf19.2977-T	orf19.2977-T		0	3	8	115	0	0	37	0	1	0	0	0	7	0	0	0	0	0	0	0	3	78
orf19.2978-T-E1	orf19.2978-T	orf19.2978-T		0	4	3	132	0	0	59	0	0	0	0	0	3	0	0	0	0	0	0	0	4	73
orf19.298-T-E1	orf19.298-T	orf19.298-T		3	0	4	125	0	0	48	3	0	0	0	0	4	0	0	0	0	0	0	0	0	77
orf19.2980-T-E1	orf19.2980-T	orf19.2980-T		0	8	23	142	0	0	63	0	0	0	0	0	23	0	0	0	0	0	0	0	8	79
orf19.2982-T-E1	orf19.2982-T	orf19.2982-T		1	9	4	150	0	0	84	0	0	0	0	0	4	0	0	0	0	1	0	0	9	66
orf19.2983-T-E1	orf19.2983-T	orf19.2983-T		0	10	3	133	0	0	55	0	0	0	0	0	3	0	0	0	0	0	0	0	10	78
orf19.2984-T-E1	orf19.2984-T	orf19.2984-T		0	8	7	132	0	0	77	0	0	0	0	0	7	0	0	0	0	0	0	0	8	55
orf19.2985-T-E1	orf19.2985-T	orf19.2985-T		0	4	2	148	0	0	79	0	0	0	0	0	2	0	0	0	0	0	0	0	4	69
orf19.2986-T-E1	orf19.2986-T	orf19.2986-T		0	1	1	154	0	0	83	0	0	0	0	0	1	0	0	0	0	0	0	0	1	71
orf19.2987-T-E1	orf19.2987-T	orf19.2987-T		0	5	4	177	0	0	71	0	0	0	0	0	4	0	0	0	0	0	0	0	5	106
orf19.2988-T-E1	orf19.2988-T	orf19.2988-T		0	10	7	155	0	0	98	0	0	0	0	0	7	0	0	0	0	0	0	0	10	57
orf19.2989-T-E1	orf19.2989-T	orf19.2989-T		2	11	14	143	0	0	78	2	0	0	0	0	14	0	0	0	0	0	0	0	11	65
orf19.299-T-E1	orf19.299-T	orf19.299-T		0	7	5	122	0	0	77	0	0	0	0	0	5	0	0	0	0	0	0	0	7	45
orf19.2990-T-E1	orf19.2990-T	orf19.2990-T		1	2	4	208	0	0	104	0	0	0	0	0	4	0	0	0	0	1	0	0	2	104
orf19.2991-T-E1	orf19.2991-T	orf19.2991-T		1	7	9	185	0	0	86	0	0	0	0	0	9	0	0	0	0	1	0	0	7	99
orf19.2992-T-E1	orf19.2992-T	orf19.2992-T		0	2	5	185	1	0	80	0	0	0	0	0	4	0	0	0	0	0	0	0	2	105
orf19.2994-T-E1	orf19.2994-T	orf19.2994-T		0	3	1	179	0	0	101	0	0	0	0	0	1	0	0	0	0	0	0	0	3	78
orf19.2994.1-T-E1	orf19.2994.1-T	orf19.2994.1-T		0	2	1	159	0	0	66	0	0	0	0	12	1	0	0	0	0	0	0	0	2	81
orf19.2995-T-E1	orf19.2995-T	orf19.2995-T		2	5	4	148	0	0	68	0	0	0	0	0	4	0	0	0	0	2	0	0	5	80
orf19.2996-T-E1	orf19.2996-T	orf19.2996-T		0	7	25	160	0	0	76	0	0	0	0	0	25	0	0	0	0	0	0	0	7	84
orf19.2998-T-E1	orf19.2998-T	orf19.2998-T		0	3	6	130	1	0	63	0	0	0	0	0	5	0	0	0	0	0	0	0	3	67
orf19.30-T-E1	orf19.30-T	orf19.30-T		0	42	11	284	0	0	148	0	0	0	0	0	11	0	0	0	0	0	0	0	42	136
orf19.300-T-E1	orf19.300-T	orf19.300-T		1	6	5	133	0	0	52	1	0	0	0	0	5	0	0	0	0	0	0	0	6	81
orf19.3000-T-E1	orf19.3000-T	orf19.3000-T		0	15	11	130	0	0	71	0	0	0	0	0	11	0	0	0	0	0	0	0	15	59
orf19.3001-T-E2	orf19.3001-T	orf19.3001-T		0	3	1	123	0	0	69	0	0	0	0	4	1	0	0	0	0	0	0	0	3	50
orf19.3002-T-E1	orf19.3002-T	orf19.3002-T		0	2	0	126	0	0	49	0	0	0	0	0	0	0	0	0	0	0	0	0	2	77
orf19.3003-T-E1	orf19.3003-T	orf19.3003-T		0	25	9	175	0	0	104	0	0	1	0	0	8	0	0	0	0	0	0	0	25	71
orf19.3003.1-T-E1	orf19.3003.1-T	orf19.3003.1-T		0	3	1	156	0	0	96	0	0	0	0	11	1	0	0	0	0	0	0	0	3	49
orf19.3004-T-E1	orf19.3004-T	orf19.3004-T		0	10	13	155	0	0	72	0	0	0	0	0	13	0	0	0	0	0	0	0	10	83
orf19.3006-T-E1	orf19.3006-T	orf19.3006-T		0	20	7	173	0	0	96	0	0	0	0	0	7	0	0	0	0	0	0	0	20	77
orf19.3007-T-E1	orf19.3007-T	orf19.3007-T		0	6	1	171	0	0	78	0	0	0	0	0	1	0	0	0	0	0	0	0	6	93
orf19.3007.2-T-E2	orf19.3007.2-T	orf19.3007.2-T		0	4	1	171	0	0	94	0	0	0	0	0	1	0	0	0	0	0	0	0	4	77
orf19.3008-T-E1	orf19.3008-T	orf19.3008-T		0	8	4	163	0	0	72	0	0	0	0	0	4	0	0	0	0	0	0	0	8	91
orf19.3009-T-E1	orf19.3009-T	orf19.3009-T		0	17	18	203	0	0	74	0	0	0	0	0	18	0	0	0	0	0	0	0	17	129
orf19.301-T-E1	orf19.301-T	orf19.301-T		0	5	9	159	1	2	56	0	0	0	0	0	6	0	0	0	0	0	0	0	5	103
orf19.3010-T-E1	orf19.3010-T	orf19.3010-T		0	6	4	229	0	0	152	0	0	0	0	0	4	0	0	0	0	0	0	0	6	77
orf19.3010.1-T-E2	orf19.3010.1-T	orf19.3010.1-T		0	19	15	264	0	1	77	0	0	0	0	35	14	0	0	0	0	0	0	0	19	152
orf19.3012-T-E1	orf19.3012-T	orf19.3012-T		0	25	14	246	0	0	173	0	0	0	0	0	14	0	0	0	0	0	0	0	25	73
orf19.3013-T-E2	orf19.3013-T	orf19.3013-T		0	8	0	171	0	0	102	0	0	0	0	2	0	0	0	1	0	0	0	0	7	68
orf19.3014-T-E1	orf19.3014-T	orf19.3014-T		0	1	1	148	0	0	79	0	0	0	0	0	1	0	0	0	0	0	0	0	1	69
orf19.3015-T-E1	orf19.3015-T	orf19.3015-T		0	7	4	141	0	0	70	0	0	0	0	0	4	0	0	0	0	0	0	0	7	71
orf19.3016-T-E1	orf19.3016-T	orf19.3016-T		0	3	2	123	0	0	59	0	0	0	0	0	2	0	0	0	0	0	0	0	3	64
orf19.3018-T-E1	orf19.3018-T	orf19.3018-T		0	4	6	121	0	0	66	0	0	0	0	0	6	0	0	0	0	0	0	0	4	55
orf19.3019-T-E1	orf19.3019-T	orf19.3019-T		0	11	7	121	0	0	57	0	0	0	0	0	7	0	0	0	0	0	0	0	11	64
orf19.302-T-E1	orf19.302-T	orf19.302-T		0	0	3	194	0	0	86	0	0	0	0	0	3	0	0	0	0	0	0	0	0	108
orf19.3021-T-E1	orf19.3021-T	orf19.3021-T		1	4	6	115	0	0	46	0	0	0	0	1	6	0	0	0	0	1	0	0	4	68
orf19.3022-T-E1	orf19.3022-T	orf19.3022-T		0	1	2	113	0	0	53	0	0	0	0	0	2	0	0	0	0	0	0	0	1	60
orf19.3023-T-E1	orf19.3023-T	orf19.3023-T		0	9	10	95	0	0	39	0	0	0	0	0	10	0	0	0	0	0	0	0	9	56
orf19.3026-T-E1	orf19.3026-T	orf19.3026-T		0	7	5	112	0	0	58	0	0	0	0	0	5	0	0	0	0	0	0	0	7	54
orf19.3027-T-E1	orf19.3027-T	orf19.3027-T		1	4	4	113	0	0	64	0	0	0	0	0	4	0	0	1	0	0	1	0	4	49
orf19.3029-T-E1	orf19.3029-T	orf19.3029-T		0	6	4	117	0	0	40	0	0	0	0	0	4	0	0	0	0	0	0	0	6	77
orf19.3030-T-E1	orf19.3030-T	orf19.3030-T		0	10	7	122	0	0	52	0	0	0	0	0	7	0	0	0	0	0	0	0	10	70
orf19.3031-T-E1	orf19.3031-T	orf19.3031-T		0	6	1	147	0	0	64	0	0	0	0	0	1	0	0	0	0	0	0	0	6	83
orf19.3034-T-E1	orf19.3034-T	orf19.3034-T		0	10	2	155	0	0	77	0	0	0	0	0	2	0	0	0	0	0	0	0	10	78
orf19.3035-T-E1	orf19.3035-T	orf19.3035-T		0	26	10	138	0	0	57	0	1	0	0	0	9	0	0	0	0	0	0	0	26	81
orf19.3037-T-E1	orf19.3037-T	orf19.3037-T		0	10	3	108	1	0	55	0	0	0	0	0	2	0	0	0	0	0	0	0	10	53
orf19.3038-T-E1	orf19.3038-T	orf19.3038-T		0	11	5	121	0	0	65	0	0	0	0	0	5	0	0	0	0	0	0	0	11	56
orf19.304-T-E1	orf19.304-T	orf19.304-T		1	7	7	183	0	0	67	1	0	0	0	0	7	0	0	0	0	0	0	0	7	116
orf19.3040-T-E1	orf19.3040-T	orf19.3040-T		0	7	2	160	0	0	107	0	0	0	0	0	2	0	0	0	0	0	0	0	7	53
orf19.3041-T-E1	orf19.3041-T	orf19.3041-T		0	7	9	168	0	0	107	0	0	0	0	0	9	0	0	0	0	0	0	0	7	61
orf19.3042-T-E1	orf19.3042-T	orf19.3042-T		0	13	9	157	0	0	95	0	0	0	0	0	9	0	0	0	0	0	0	0	13	62
orf19.3043-T-E1	orf19.3043-T	orf19.3043-T		0	6	4	156	0	0	51	0	0	0	0	0	4	0	0	0	0	0	0	0	6	105
orf19.3045-T-E1	orf19.3045-T	orf19.3045-T		0	7	7	155	0	0	107	0	0	0	0	0	7	0	0	0	0	0	0	0	7	48
orf19.3047-T-E1	orf19.3047-T	orf19.3047-T		0	12	10	187	0	0	100	0	0	0	0	0	10	0	0	0	0	0	0	0	12	87
orf19.3048-T-E1	orf19.3048-T	orf19.3048-T		0	21	26	120	0	0	48	0	0	0	0	0	26	0	0	0	0	0	0	0	21	72
orf19.3049-T-E1	orf19.3049-T	orf19.3049-T		0	5	5	178	0	0	87	0	0	0	0	0	5	0	0	0	0	0	0	0	5	91
orf19.305-T-E1	orf19.305-T	orf19.305-T		0	8	9	161	0	0	62	0	0	0	0	0	9	0	0	0	0	0	0	0	8	99
orf19.3050-T-E1	orf19.3050-T	orf19.3050-T		0	25	10	206	0	0	78	0	0	0	0	0	10	0	0	0	0	0	0	0	25	128
orf19.3051-T-E1	orf19.3051-T	orf19.3051-T		0	4	3	200	0	0	110	0	0	0	0	0	3	0	0	0	0	0	0	0	4	90
orf19.3052-T-E1	orf19.3052-T	orf19.3052-T		0	9	0	189	0	0	98	0	0	0	0	0	0	0	0	0	0	0	0	0	9	91
orf19.3053-T-E1	orf19.3053-T	orf19.3053-T		0	9	2	194	0	0	96	0	0	0	0	0	2	0	0	0	0	0	0	0	9	98
orf19.3054-T-E1	orf19.3054-T	orf19.3054-T		0	12	11	198	0	0	71	0	0	0	0	0	11	0	0	0	0	0	0	0	12	127
orf19.3055-T-E1	orf19.3055-T	orf19.3055-T		0	8	8	203	0	0	98	0	0	0	0	0	8	0	0	0	0	0	0	0	8	105
orf19.3057-T-E1	orf19.3057-T	orf19.3057-T		1	3	2	198	0	0	102	0	0	0	0	0	2	0	0	1	0	0	1	0	3	96
orf19.3058-T-E1	orf19.3058-T	orf19.3058-T		0	8	6	193	0	0	98	0	0	0	0	0	6	0	0	0	0	0	0	0	8	95
orf19.3059-T-E1	orf19.3059-T	orf19.3059-T		0	6	1	179	0	0	77	0	0	0	0	0	1	0	0	0	0	0	0	0	6	102
orf19.3059.1-T-E1	orf19.3059.1-T	orf19.3059.1-T		0	1	0	172	0	0	76	0	0	0	0	0	0	0	0	0	0	0	0	0	1	96
orf19.306-T-E1	orf19.306-T	orf19.306-T		1	8	7	156	1	0	65	0	0	0	0	0	6	0	0	0	0	1	0	0	8	91
orf19.3060-T-E1	orf19.3060-T	orf19.3060-T		0	8	3	176	0	0	77	0	0	0	0	0	3	0	0	0	0	0	0	0	8	99
orf19.3061-T-E1	orf19.3061-T	orf19.3061-T		0	4	3	183	0	0	93	0	0	0	0	0	3	0	0	0	0	0	0	0	4	90
orf19.3061.1-T-E2	orf19.3061.1-T	orf19.3061.1-T		0	0	0	188	0	0	91	0	0	0	0	10	0	0	0	0	0	0	0	0	0	87
orf19.3062-T-E1	orf19.3062-T	orf19.3062-T		0	22	41	194	0	0	92	0	0	0	0	0	41	0	0	0	0	0	0	0	22	102
orf19.3063-T-E1	orf19.3063-T	orf19.3063-T		0	4	5	183	0	0	88	0	0	0	0	0	5	0	0	0	0	0	0	0	4	95
orf19.3064-T-E1	orf19.3064-T	orf19.3064-T		0	5	0	186	0	0	89	0	0	0	0	0	0	0	0	0	0	0	0	0	5	97
orf19.3064.1-T-E1	orf19.3064.1-T	orf19.3064.1-T		0	3	2	176	0	0	88	0	0	0	0	0	2	0	0	0	0	0	0	0	3	88
orf19.3065-T-E1	orf19.3065-T	orf19.3065-T		0	15	12	168	0	0	94	0	0	0	0	0	12	0	0	0	0	0	0	0	15	74
orf19.3066-T-E1	orf19.3066-T	orf19.3066-T		0	27	20	191	0	1	99	0	1	1	0	0	17	0	0	0	0	0	0	0	27	92
orf19.307-T-E1	orf19.307-T	orf19.307-T		0	7	10	166	0	1	64	0	0	2	0	0	7	0	0	0	0	0	0	0	7	102
orf19.3071-T-E1	orf19.3071-T	orf19.3071-T		0	22	31	214	0	2	118	0	1	1	0	0	27	0	0	0	0	0	0	0	22	96
orf19.3073-T-E1	orf19.3073-T	orf19.3073-T		0	2	2	578	0	0	0	0	0	0	0	0	2	0	0	0	0	0	0	0	2	578
orf19.3074-T-E1	orf19.3074-T	orf19.3074-T		1	20	16	794	0	1	213	1	0	1	0	0	14	0	0	1	0	0	0	1	19	581
orf19.3076-T-E1	orf19.3076-T	orf19.3076-T		0	6	3	771	0	0	572	0	0	0	0	0	3	0	0	0	0	0	0	0	6	199
orf19.3077-T-E1	orf19.3077-T	orf19.3077-T		2	47	33	689	4	7	172	2	4	0	0	0	18	0	0	0	0	0	0	0	47	517
orf19.308-T-E1	orf19.308-T	orf19.308-T		0	10	4	216	0	0	161	0	0	0	0	0	4	0	0	0	0	0	0	0	10	55
orf19.3080-T-E1	orf19.3080-T	orf19.3080-T		0	73	34	437	0	0	125	0	0	0	0	0	34	0	0	0	0	0	0	0	73	312
orf19.3083-T-E1	orf19.3083-T	orf19.3083-T		0	21	15	301	0	0	123	0	0	0	0	0	15	0	0	0	0	0	0	0	21	178
orf19.3084-T-E1	orf19.3084-T	orf19.3084-T		0	15	5	335	0	0	191	0	0	0	0	0	5	0	0	0	0	0	0	0	15	144
orf19.3086-T-E1	orf19.3086-T	orf19.3086-T		0	44	11	292	0	0	158	0	0	0	0	0	11	0	0	0	0	0	0	0	44	134
orf19.3087-T-E1	orf19.3087-T	orf19.3087-T		0	7	5	268	0	0	131	0	1	0	0	0	4	0	0	0	0	0	0	0	7	137
orf19.3087.1-T-E1	orf19.3087.1-T	orf19.3087.1-T		0	2	2	263	0	0	117	0	0	0	0	0	2	0	0	0	0	0	0	0	2	146
orf19.3087.2-T-E1	orf19.3087.2-T	orf19.3087.2-T		0	1	2	262	0	0	143	0	0	0	0	0	2	0	0	0	0	0	0	0	1	119
orf19.3088-T-E1	orf19.3088-T	orf19.3088-T		2	1	3	256	0	0	135	2	0	0	0	0	3	0	0	0	0	0	0	0	1	121
orf19.3089-T-E1	orf19.3089-T	orf19.3089-T		0	6	2	248	0	0	128	0	0	0	0	0	2	0	0	0	0	0	0	0	6	120
orf19.309-T-E1	orf19.309-T	orf19.309-T		2	30	19	193	0	0	69	2	0	0	0	0	19	0	0	0	0	0	0	0	30	124
orf19.3091-T-E1	orf19.3091-T	orf19.3091-T		5	34	65	215	3	1	125	4	2	4	0	0	55	0	0	0	0	1	0	0	34	90
orf19.3093-T-E1	orf19.3093-T	orf19.3093-T		0	39	8	194	0	0	74	0	0	0	0	0	8	0	0	0	0	0	0	0	39	120
orf19.3097-T-E1	orf19.3097-T	orf19.3097-T		0	15	0	172	0	0	80	0	0	0	0	0	0	0	0	0	0	0	0	0	15	92
orf19.3098-T-E1	orf19.3098-T	orf19.3098-T		0	56	35	208	0	0	116	0	0	0	0	0	35	0	0	0	0	0	0	0	56	92
orf19.3099-T-E1	orf19.3099-T	orf19.3099-T		0	14	7	197	0	0	110	0	0	0	0	0	7	0	0	0	0	0	0	0	14	87
orf19.31-T-E1	orf19.31-T	orf19.31-T		0	11	7	242	0	0	148	0	0	0	0	0	7	0	0	0	0	0	0	0	11	94
orf19.310-T-E1	orf19.310-T	orf19.310-T		2	19	16	206	0	0	128	0	0	0	0	0	16	0	0	0	0	2	0	0	19	78
orf19.3100-T-E1	orf19.3100-T	orf19.3100-T		0	27	15	209	0	0	82	0	0	0	0	0	15	0	0	0	0	0	0	0	27	127
orf19.3102-T-E1	orf19.3102-T	orf19.3102-T		0	9	7	194	1	0	110	0	0	0	0	0	6	0	0	0	0	0	0	0	9	84
orf19.3103-T-E1	orf19.3103-T	orf19.3103-T		0	54	8	200	0	0	118	0	0	0	0	0	8	0	0	0	0	0	0	0	54	82
orf19.3104-T-E1	orf19.3104-T	orf19.3104-T		0	11	0	163	0	0	88	0	0	0	0	0	0	0	0	0	0	0	0	0	11	75
orf19.3105-T-E1	orf19.3105-T	orf19.3105-T		0	12	12	163	0	0	89	0	0	0	0	0	12	0	0	0	0	0	0	0	12	74
orf19.3106-T-E1	orf19.3106-T	orf19.3106-T		0	3	1	176	0	0	89	0	0	0	0	0	1	0	0	0	0	0	0	0	3	87
orf19.3107-T-E1	orf19.3107-T	orf19.3107-T		0	4	2	195	0	0	111	0	0	0	0	0	2	0	0	0	0	0	0	0	4	84
orf19.3108-T-E1	orf19.3108-T	orf19.3108-T		0	6	1	193	0	0	116	0	0	0	0	0	1	0	0	0	0	0	0	0	6	77
orf19.3109-T-E1	orf19.3109-T	orf19.3109-T		1	5	6	194	0	0	78	0	0	0	0	0	6	0	0	1	0	0	1	0	5	116
orf19.3110-T-E1	orf19.3110-T	orf19.3110-T		0	15	20	186	0	0	75	0	0	0	0	0	20	0	0	0	0	0	0	0	15	111
orf19.3111-T-E1	orf19.3111-T	orf19.3111-T		0	9	6	191	0	0	111	0	0	0	0	0	6	0	0	0	0	0	0	0	9	80
orf19.3112-T-E1	orf19.3112-T	orf19.3112-T		2	17	7	179	0	0	60	2	0	0	0	0	7	0	0	0	0	0	0	0	17	119
orf19.3113-T-E1	orf19.3113-T	orf19.3113-T		0	1	3	181	0	0	116	0	0	0	0	0	3	0	0	0	0	0	0	0	1	65
orf19.3114-T-E1	orf19.3114-T	orf19.3114-T		1	4	2	175	0	0	120	0	0	0	0	0	2	0	0	1	0	0	1	0	4	55
orf19.3115-T-E1	orf19.3115-T	orf19.3115-T		0	3	9	166	0	0	57	0	0	0	0	0	9	0	0	0	0	0	0	0	3	109
orf19.3116-T-E1	orf19.3116-T	orf19.3116-T		0	0	0	158	0	0	77	0	0	0	0	0	0	0	0	0	0	0	0	0	0	81
orf19.3117-T-E1	orf19.3117-T	orf19.3117-T		0	2	3	148	0	0	87	0	0	0	0	0	3	0	0	0	0	0	0	0	2	61
orf19.3120-T-E1	orf19.3120-T	orf19.3120-T		1	3	7	168	0	0	66	1	0	0	0	0	7	0	0	0	0	0	0	0	3	102
orf19.3121-T-E1	orf19.3121-T	orf19.3121-T		2	9	5	157	0	0	57	1	0	0	0	0	5	0	0	0	0	1	0	0	9	100
orf19.3122-T-E1	orf19.3122-T	orf19.3122-T		0	15	4	170	0	0	72	0	0	0	0	0	4	0	0	0	0	0	0	0	15	98
orf19.3122.2-T-E1	orf19.3122.2-T	orf19.3122.2-T		0	3	2	180	0	0	83	0	0	0	0	0	2	0	0	0	0	0	0	0	3	97
orf19.3123-T-E1	orf19.3123-T	orf19.3123-T		0	8	0	176	0	0	101	0	0	0	0	0	0	0	0	0	0	0	0	0	8	75
orf19.3123.2-T-E4	orf19.3123.2-T	orf19.3123.2-T		0	5	2	174	0	0	66	0	0	0	0	9	2	0	0	3	0	0	0	0	2	102
orf19.3124-T-E1	orf19.3124-T	orf19.3124-T		0	16	6	179	0	0	81	0	0	0	0	0	6	0	0	0	0	0	0	0	16	98
orf19.3125-T-E1	orf19.3125-T	orf19.3125-T		0	3	4	196	0	0	99	0	0	0	0	0	4	0	0	0	0	0	0	0	3	97
orf19.3126-T-E1	orf19.3126-T	orf19.3126-T		0	6	3	202	0	0	117	0	0	0	0	0	3	0	0	0	0	0	0	0	6	85
orf19.3127-T-E1	orf19.3127-T	orf19.3127-T		2	8	7	176	0	0	85	2	0	2	0	0	5	0	0	0	0	0	0	0	8	91
orf19.3128-T-E1	orf19.3128-T	orf19.3128-T		0	19	5	233	0	0	149	0	0	0	0	0	5	0	0	0	0	0	0	0	19	84
orf19.3129-T-E1	orf19.3129-T	orf19.3129-T		0	15	4	227	0	0	87	0	0	0	0	0	4	0	0	0	0	0	0	0	15	140
orf19.313-T-E1	orf19.313-T	orf19.313-T		1	11	6	231	0	0	167	0	0	0	0	0	6	0	0	0	0	1	0	0	11	64
orf19.3130-T-E1	orf19.3130-T	orf19.3130-T		0	12	2	220	0	0	84	0	0	0	0	0	2	0	0	0	0	0	0	0	12	136
orf19.3131-T-E1	orf19.3131-T	orf19.3131-T		0	16	14	227	0	0	97	0	0	0	0	0	14	0	0	0	0	0	0	0	16	130
orf19.3132-T-E1	orf19.3132-T	orf19.3132-T		0	12	6	289	0	0	151	0	0	0	0	0	6	0	0	0	0	0	0	0	12	138
orf19.3133-T-E1	orf19.3133-T	orf19.3133-T		0	25	2	305	0	0	139	0	0	0	0	0	2	0	0	0	0	0	0	0	25	166
orf19.3134-T-E1	orf19.3134-T	orf19.3134-T		3	4	6	236	0	0	70	3	0	0	0	0	6	0	0	0	0	0	0	0	4	166
orf19.3135-T-E1	orf19.3135-T	orf19.3135-T		0	9	12	257	1	0	84	0	1	0	0	0	10	0	0	0	0	0	0	0	9	173
orf19.3136-T-E1	orf19.3136-T	orf19.3136-T		0	19	5	237	0	0	108	0	0	0	0	0	5	0	0	0	0	0	0	0	19	129
orf19.3138-T-E1	orf19.3138-T	orf19.3138-T		0	4	2	228	0	0	103	0	0	0	0	0	2	0	0	0	0	0	0	0	4	125
orf19.3139-T-E1	orf19.3139-T	orf19.3139-T		0	13	5	206	0	0	73	0	0	0	0	0	5	0	0	0	0	0	0	0	13	133
orf19.314-T-E1	orf19.314-T	orf19.314-T		0	13	19	163	0	0	64	0	0	0	0	0	19	0	0	0	0	0	0	0	13	99
orf19.3140-T-E1	orf19.3140-T	orf19.3140-T		2	2	16	192	0	0	85	2	0	0	0	0	16	0	0	0	0	0	0	0	2	107
orf19.3140.1-T-E2	orf19.3140.1-T	orf19.3140.1-T		0	3	2	204	0	0	106	0	0	0	0	1	2	0	0	0	0	0	0	0	3	97
orf19.3141-T-E1	orf19.3141-T	orf19.3141-T		0	30	25	192	2	0	76	0	0	1	0	0	22	0	0	0	0	0	0	0	30	116
orf19.3142-T-E1	orf19.3142-T	orf19.3142-T		0	9	3	211	0	0	134	0	0	0	0	0	3	0	0	0	0	0	0	0	9	77
orf19.3147-T-E1	orf19.3147-T	orf19.3147-T		0	4	12	324	1	2	186	0	0	5	0	0	4	0	0	0	0	0	0	0	4	138
orf19.3148-T-E1	orf19.3148-T	orf19.3148-T		6	16	41	381	9	5	156	6	5	8	0	0	14	0	0	0	0	0	0	0	16	225
orf19.3149-T-E1	orf19.3149-T	orf19.3149-T		0	8	1	381	0	0	196	0	0	0	0	0	1	0	0	0	0	0	0	0	8	185
orf19.315-T-E1	orf19.315-T	orf19.315-T		0	6	3	118	0	0	61	0	0	0	0	0	3	0	0	0	0	0	0	0	6	57
orf19.3150-T-E1	orf19.3150-T	orf19.3150-T		0	7	7	344	0	0	222	0	0	0	0	0	7	0	0	0	0	0	0	0	7	122
orf19.3151-T-E1	orf19.3151-T	orf19.3151-T		0	6	21	328	1	4	181	0	0	2	0	0	14	0	0	0	0	0	0	0	6	147
orf19.3152-T-E1	orf19.3152-T	orf19.3152-T		0	10	10	380	0	0	170	0	1	5	0	0	4	0	0	0	0	0	0	0	10	210
orf19.3153-T-E1	orf19.3153-T	orf19.3153-T		2	8	29	373	4	3	176	2	2	2	0	0	18	0	0	0	0	0	0	0	8	197
orf19.3154-T-E1	orf19.3154-T	orf19.3154-T		2	5	30	329	5	9	153	2	0	0	0	0	16	0	0	0	0	0	0	0	5	176
orf19.3156-T-E1	orf19.3156-T	orf19.3156-T		1	27	71	297	8	10	150	1	11	11	0	0	31	0	0	0	0	0	0	0	27	147
orf19.3158-T-E1	orf19.3158-T	orf19.3158-T		0	9	6	266	1	0	152	0	1	2	0	0	2	0	0	0	0	0	0	0	9	114
orf19.3159-T-E1	orf19.3159-T	orf19.3159-T		6	67	62	320	4	0	173	5	0	0	0	0	58	0	0	0	0	1	0	0	67	147
orf19.3159.4-T-E1	orf19.3159.4-T	orf19.3159.4-T		2	7	6	512	0	0	387	2	0	0	0	0	6	0	0	0	0	0	0	0	7	125
orf19.316-T-E1	orf19.316-T	orf19.316-T		0	2	0	123	0	0	65	0	0	0	0	0	0	0	0	0	0	0	0	0	2	58
orf19.3160-T-E1	orf19.3160-T	orf19.3160-T		0	2	2	499	0	0	116	0	0	0	0	0	2	0	0	0	0	0	0	0	2	383
orf19.3161-T-E1	orf19.3161-T	orf19.3161-T		0	7	6	414	0	0	97	0	0	0	0	0	6	0	0	0	0	0	0	0	7	317
[truncated: 4,469 more rows]
