# Supplementary material for: Integrative multi-omics profiling reveals cAMP-independent mechanisms regulating hyphal morphogenesis in Candida albicans
Source: PLoS Pathog. 2021 Aug 16;17(8):e1009861. doi: 10.1371/journal.ppat.1009861 (PMC8389844; doi:10.1371/journal.ppat.1009861)
Supplement: S3 Data — (XLSX) [file ppat.1009861.s014.xlsx]

## Sheet: Readme
These spreadsheets show location, modification, abundance, and sequence of phosphopeptides identified from LC-MS/MS analysis
There are 4 samples, WT +/- GlcNAc and PR13 +/- GlcNAc
The columns in this table are:
Column name	Meaning
Gene_ID	Gene's ID
Gene	Gene name
Positions in Master Proteins	UniProt accession number of the original protein and the position of the detected peptide. For example, “A0A1D8PC38 [33-47]” means that this peptide was from the protein A0A1D8PC38 (UniProt accession number) and its location is from 33 to 47 in amino acid.
Modifications in Master Proteins	UniProt accession number of the original protein, and the number and the position of the protein modification (e.g. phosphorylation).
Protein	Protein description
A/B (log2Fold)	Log2 fold change in abundance (A versus B)
Abundance	The phosphopeptide abundance is expressed in a label free quantitation (LFQ) unit normalized by protein abundance.
Kinase substrate	Y indicates the phosphorylation site has a consensus motif for the specific kinase.
15-mer	15-amino acid sequence spanning the phosphorylation site (+/- 7 amino acids)

## Sheet: Total phoshopeptides
Gene_ID	Gene	Positions in Master Proteins	Modifications in Master Proteins	Protein	WT_GalNAG/WT_Gal (log2Fold)	PR13_GalNAG/PR13_Gal (log2Fold)	PR13_Gal/WT_Gal (log2Fold)	PR13_GalNAG/WT_GalNAG (log2Fold)	WT_Gal_1 (abundance)	WT_Gal_2 (abundance)	WT_GalNAG_1 (abundance)	WT_GalNAG_2 (abundance)	PR13_Gal_1 (abundance)	PR13_Gal_2 (abundance)	PR13_GalNAG_1 (abundance)	PR13_GalNAG_2 (abundance)	PKA (R/K‐R/K‐x‐[S/T]) substrate	Cdc28 ([S/T]-P-x-K/R) substrate	Casein Kinase 1 (S/T-x-x-[S/T]) substrate	Cbk1 (H-x-K/R-x-x-[S/T] or H-x-x-K/R-x-[S/T]) substrate	MAPK (P-x-[S/T]-P) substrate	Gin4 (R-S-x-[S/T]) substrate	15mer #1	15mer #2	15mer #3	15mer #4
C1_00040W	CTA2	A0A1D8PC38 [33-47]	A0A1D8PC38 1xPhospho [S/T]	Cta2p	-0.149735	-0.0422759	-0.247646	-0.140187	2.16759e+07	3.84603e+07	2.32456e+07	3.09621e+07	3.42377e+07	1.64131e+07	2.42955e+07	2.48927e+07
C1_00070W	MVD	A0A1D8PC43 [85-95]	A0A1D8PC43 1xPhospho [T93]	Diphosphomevalonate decarboxylase (EC 4.1.1.33)	-1.14567	-1.90449	2.91383	2.15501	70.5958	0	16.1858	15.174	410.917	127.643	50.8524	92.2693			Y		Y		SIEQSPDTPKLSQMK
C1_00110W	CCT8	Q5AB74 [5-15]	Q5AB74 1xPhospho [S11]	Chaperonin-containing T-complex subunit	-0.814643	-0.423925	-0.388958	0.0017594	654.791	657.052	291.637	453.779	530.809	470.784	395.98	350.347							KLPQAPNSGLFKQGY
C1_00130C	VPS53	Q5AB78 [1-14]	Q5AB78 1xAcetyl [N-Term]; 1xPhospho [S3]	Vps53p	7.90377	1.0813	7.19683	0.374371	154548	275048	4.52341e+07	5.76463e+07	6.28566e+07	170129	6.82731e+07	6.50881e+07							XXXXXMDSPTYDPTT
C1_00140W	KEL1	Q5AB80 [473-489]	Q5AB80 1xPhospho [S/T]	Kel1p	-0.451011	-0.496459	0.145446	0.099998	1258.94	2567.75	1199.72	1599.36	2015.72	2216.99	1458.91	1541.13
C1_00140W	KEL1	Q5AB80 [944-983]	Q5AB80 1xPhospho [S/Y]	Kel1p	1.33039	-1.04679	2.43103	0.0538457	283.218	0	348.463	365.262	1002.55	529.175	517.494	223.411
C1_00140W	KEL1	Q5AB80 [823-847]	Q5AB80 1xPhospho [S]	Kel1p	-1.55673	-1.76014	1.11315	0.90974	47.7815	113.174	27.4041	26.6478	245.284	104.054	62.7981	39.6282
C1_00140W	KEL1	Q5AB80 [14-35]	Q5AB80 1xPhospho [S]	Kel1p	0.438818	-0.879206	1.48964	0.171614	520.236	635.863	636.824	930.615	2531.41	716.938	819.903	945.658
C1_00140W	KEL1	Q5AB80 [473-496]	Q5AB80 1xPhospho [S]	Kel1p	0.837922	0.968195	1.50675	1.63702	233.377	0	122.195	295.747	401.218	263.808	674.061	627.946
C1_00140W	KEL1	Q5AB80 [547-552]	Q5AB80 1xPhospho [S548]	Kel1p	0	-1.59428	9.40141	7.80713	0	0	0	0	467.071	208.177	99.6628	123.303							DEPFRRRSLDPKFDD
C1_00140W	KEL1	Q5AB80 [633-643]	Q5AB80 1xPhospho [S635]	Kel1p	-1.07756	-1.28625	-0.139221	-0.347915	665.152	1438.21	264.306	731.807	1517.37	392.41	489.048	293.403							EQLERQNSLLHQSQQ
C1_00140W	KEL1	Q5AB80 [627-643]	Q5AB80 1xPhospho [S635]	Kel1p	0.201982	-10.2656	1.95454	-8.51309	158.225	158.384	132.585	231.753	771.871	458.152	0	0							EQLERQNSLLHQSQQ
C1_00140W	KEL1	Q5AB80 [777-796]	Q5AB80 1xPhospho [S785]	Kel1p	-1.99062	-2.74839	1.15542	0.397647	264.239	290.808	0	138.919	769.253	468.337	110.594	72.7288							IHNDDDISDGEVELQ
C1_00140W	KEL1	Q5AB80 [777-803]	Q5AB80 1xPhospho [S785]	Kel1p	-0.893538	0.418182	-0.222105	1.08961	1187.92	2274.7	776.541	1086.9	1807.18	1161.23	2289.52	1677.33							IHNDDDISDGEVELQ
C1_00140W	KEL1	Q5AB80 [944-983]	Q5AB80 1xPhospho [Y980]	Kel1p	0	7.65706	0	7.65706	0	0	0	0	0	0	146.431	54.4082							DVISTAHYNMKIKDL
C1_00140W	KEL1	Q5AB80 [473-489]	Q5AB80 2xPhospho [S473; S475]	Kel1p	-0.194743	-0.208108	0.130303	0.116939	49.6522	104.134	45.9194	88.3222	89.401	79.0167	73.2463	72.4139				Y		Y	GYDRHARSFSGGPED	DRHARSFSGGPEDFA
C1_00140W	KEL1	Q5AB80 [473-496]	Q5AB80 2xPhospho [S493; S/T]	Kel1p	0.690216	0.646373	1.04955	1.00571	107.579	162.261	194.134	241.873	363.091	196.516	482.251	394.227		Y					ASARGSPSPERTQGG
C1_00140W	KEL1	Q5AB80 [14-35]	Q5AB80 2xPhospho [T/S]	Kel1p	1.74693	-6.59773	0.413351	-7.93131	71.7251	0	106.636	136.462	74.0981	21.7555	0	0
C1_00140W	KEL1	Q5AB80 [14-35]	Q5AB80 3xPhospho [S27; S28; S31]	Kel1p	-5.51851	-9.85431	4.3358	0	44.8392	0	0	0	617.429	307.214	0	0			Y				DTTVSSSSSTNSANR	TTVSSSSSTNSANRK	SSSSSTNSANRKSTS
C1_00150C	RIM8	Q9UW13 [263-270]	Q9UW13 1xPhospho [S263]	pH-response regulator protein palF/RIM8	-11.9159	-0.449257	0.507314	11.9739	2201.25	1661.71	0	0	2487.39	3003.86	4021.63	0			Y				SDHKSLKSIPVPTIK
C1_00150C	RIM8	Q9UW13 [154-178]	Q9UW13 1xPhospho [T/S]	pH-response regulator protein palF/RIM8	-1.23933	0.781766	1.19039	3.21149	55236.9	21253.8	14466.7	17931.9	79849.3	94715.2	88906.1	211212
C1_00150C	RIM8	Q9UW13 [154-178]	Q9UW13 2xPhospho [S/T]	pH-response regulator protein palF/RIM8	-11.6883	-14.2682	2.57998	0	0	3299.03	0	0	13341.2	6389.8	0	0
C1_00160C	C1_00160C	Q5AB84 [379-388]	Q5AB84 1xPhospho [S/T]	Uncharacterized protein	0.439569	-2.87183	1.62922	-1.68218	537.964	677.766	1042.73	606.403	3441.4	321.5	298.917	214.282
C1_00160C	C1_00160C	Q5AB84 [75-99]	Q5AB84 1xPhospho [S]	Uncharacterized protein	-0.917769	-10.4737	2.21082	-7.34509	25.9692	280.194	20.1565	141.433	1191.68	229.299	0	0
C1_00160C	C1_00160C	Q5AB84 [144-156]	Q5AB84 1xPhospho [S147]	Uncharacterized protein	-1.6221	-3.73143	1.73474	-0.374601	209.482	0	67.378	0	629.046	70.4779	51.7412	0							KKRKAEESKEEESAP
C1_00160C	C1_00160C	Q5AB84 [374-388]	Q5AB84 1xPhospho [S379]	Uncharacterized protein	0.446019	-1.66128	1.87354	-0.233765	254.741	106.202	332.93	159.137	1094.3	230.968	236.174	182.136			Y				ERSATPRSGNSTPRP
C1_00160C	C1_00160C	Q5AB84 [374-388]	Q5AB84 2xPhospho [S/T]	Uncharacterized protein	-0.170731	-0.440563	0.0562405	-0.213591	1724.13	3399.06	1954.58	2596.71	4331.17	995.721	1809.85	2114.99
C1_00160C	C1_00160C	Q5AB84 [372-388]	Q5AB84 2xPhospho [S374; S/T]	Uncharacterized protein	-0.0152089	0.207219	2.29582	2.51825	27.9332	72.3435	50.0096	49.2051	447.987	48.3158	361.166	211.951							GFGGRERSATPRSGN
C1_00160C	C1_00160C	Q5AB84 [75-99]	Q5AB84 2xPhospho [S81; S90]	Uncharacterized protein	-3.48683	-6.87092	3.38408	0	10.2109	0	0	0	87.2241	28.8206	0	0			Y				KESSSDESDDEDKKE	DEDKKEESSSGSDEE
C1_00160C	C1_00160C	Q5AB84 [372-388]	Q5AB84 3xPhospho [S379; S382; T/S]	Uncharacterized protein	-2.38413	0.558664	0.0362288	2.97902	70.6694	131.662	16.033	21.9172	174.842	32.6603	139.352	166.752			Y				ERSATPRSGNSTPRP	ATPRSGNSTPRPNKS
C1_00160C	C1_00160C	Q5AB84 [374-388]	Q5AB84 3xPhospho [T376; S382; T/S]	Uncharacterized protein	1.1617	-3.40237	2.71932	-1.84476	19.8147	22.7748	57.6168	38.9024	270.183	15.882	15.4998	10.6498			Y			Y	GGRERSATPRSGNST	ATPRSGNSTPRPNKS
C1_00160C	C1_00160C	Q5AB84 [372-388]	Q5AB84 4xPhospho [S374; T376; S379; S382]	Uncharacterized protein	0	-9.384	9.384	0	0	0	0	0	560.185	106.954	0	0			Y			Y	GFGGRERSATPRSGN	GGRERSATPRSGNST	ERSATPRSGNSTPRP	ATPRSGNSTPRPNKS
C1_00180W	RPL16A	Q5AB87 [163-171]	Q5AB87 1xPhospho [S165]	Ribosomal 60S subunit protein L16A	10.1539	-0.0793137	9.51513	-0.718106	0	0	277.733	860.561	266.238	464.475	691.572	0							EEKRKVQSAEYYAKK
C1_00180W	RPL16A	Q5AB87 [20-26]	Q5AB87 1xPhospho [S22]	Ribosomal 60S subunit protein L16A	-13.0294	-9.51214	-3.5173	0	4452.75	3907.13	0	0	283.079	446.115	0	0							HLLGRLASIVSKQIL
C1_00180W	RPL16A	Q5AB87 [76-83]	Q5AB87 1xPhospho [S78]	Ribosomal 60S subunit protein L16A	-5.5031	-1.2339	-2.14737	2.12183	11557.1	4707.63	357.654	0	1699.42	1971.12	1209.87	350.156				Y			PFHFRAPSRILYKAI
C1_00180W	RPL16A	Q5AB87 [135-141]	Q5AB87 1xPhospho [T137]	Ribosomal 60S subunit protein L16A	3.94389	-2.04834	1.68485	-4.30738	1702.86	0	7928.41	18292.4	2311.47	3165.56	959.866	363.513	Y						LKPGRKYTTVGKLSS
C1_00220W	PHR2	O13318 [239-250]	O13318 1xPhospho [S244]	pH-responsive protein 2 (pH-regulated protein 2)	2.28698	-1.38679	3.03195	-0.641818	93.7094	0	287.704	173.509	181.619	592.023	163.272	131.963							YKASGYESATNDYKN
C1_00230C	BFA1	A0A1D8PC67 [212-217]	A0A1D8PC67 1xPhospho [S212]	Bfa1p	0.656534	-21.334	1.41824	-20.5723	989080	0	828495	730584	1.65329e+06	990116	0	0							PTLKKYKSYGEFKCD
C1_00290W	POL93	A0A1D8PC70 [397-403]	A0A1D8PC70 1xPhospho [T400]	Pol93p	-2.02418	2.65818	-3.44348	1.23888	1.44305e+06	8.68368e+06	764424	1.72519e+06	930843	0	3.26212e+06	2.61372e+06			Y				SINKSVVTVLRAYCG
C1_00320W	C1_00320W	Q5AB94 [200-213]	Q5AB94 1xPhospho [S209]	Vacuolar protein sorting-associated protein 29	2.19606	-2.69276	2.52731	-2.36151	1758.44	0	4072.19	3989.02	7236.59	2905.52	1014.17	553.64			Y				NETSTSASDDFKQTL
C1_00320W	C1_00320W	Q5AB94 [179-199]	Q5AB94 1xPhospho [T186]	Vacuolar protein sorting-associated protein 29	-0.366352	-11.0015	2.18363	-8.4515	450.271	0	349.07	0	1592.95	456.143	0	0							SQDDDEATDKESHDT
C1_00340W	HBR1	Q8TG40 [67-76]	Q8TG40 1xPhospho [S70]	Adenylate kinase isoenzyme 6 homolog HBR1 (AK6) (EC 2.7.4.3) (Dual activity adenylate kinase/ATPase) (AK/ATPase) (Hemoglobin and proliferation-regulated protein 1) (Hb-regulated protein 1)	-0.720387	-0.669006	-0.926747	-0.875365	845.928	3130.04	742.624	1670.14	1079.36	1011.7	1013.54	301.236							YDAKLDTSIVDEDKL
C1_00410C	C1_00410C	A0A1D8PC76 [112-120]	A0A1D8PC76 2xPhospho [T113; T118]	Aldehyde dehydrogenase	0.262146	-0.53016	-0.690663	-1.48297	204.748	507.557	242.286	612.152	304.278	136.663	305.034	0							WVKPEKVTDLPITLK	KVTDLPITLKSNPIY
C1_00430W	ATG18	Q5ABA6 [402-424]	Q5ABA6 1xPhospho [S]	Autophagy-related protein 18	-2.00934	2.76183	-2.34753	2.42363	20815.4	4750.82	3300.32	3049.24	2084.65	2937.84	27678	6393
C1_00440W	UBP6	A0A1D8PC77 [64-74]	A0A1D8PC77 1xPhospho [T71]	Ubiquitin carboxyl-terminal hydrolase (EC 3.4.19.12)	-1.54251	1.24837	-1.83362	0.957258	1211.02	3269.01	562.983	974.3	674.545	581.653	2403.76	581.993		Y					SPVMVLGTPDKNLPS
C1_00440W	UBP6	A0A1D8PC77 [64-74]	A0A1D8PC77 1xPhospho [T71]	Ubiquitin carboxyl-terminal hydrolase (EC 3.4.19.12)	7.71788	1.16104	7.28952	0.732684	0	0	113.503	96.0272	88.3493	67.0969	307.461	41.3828		Y					SPVMVLGTPDKNLPS
C1_00490C	TTR1	Q5ABB1 [50-57]	Q5ABB1 1xPhospho [S/T]	Dithiol glutaredoxin	1.69358	-14.5134	3.96186	-12.2451	1499.78	0	2837.48	2015.91	5492.65	17892.4	0	0
C1_00490C	TTR1	Q5ABB1 [107-114]	Q5ABB1 1xPhospho [S]	Dithiol glutaredoxin	-1.49094	-5.97172	7.7348	3.25402	419.482	0	148.599	0	4097.02	85470.5	445.245	980.965
C1_00490C	TTR1	Q5ABB1 [40-46]	Q5ABB1 1xPhospho [Y41]	Dithiol glutaredoxin	9.27715	-12.0805	12.0805	-9.27715	0	0	619.442	0	0	4329.98	0	0							VFIASKSYCPYCKAT
C1_00500C	GLO1	Q5ABB2 [202-212]	Q5ABB2 1xPhospho [S206]	Lactoylglutathione lyase (EC 4.4.1.5) (Glyoxalase I)	-0.212383	-0.387419	1.61721	1.44218	429.828	261.218	266.276	330.036	1308.82	813.253	816.69	805.388							GFKLLSTSEHEGAKF
C1_00530C	C1_00530C	Q5ABB5 [56-65]	Q5ABB5 1xPhospho [S/T]	Uncharacterized protein	8.96152	6.11546	2.85154	0.00547059	14309.8	28670.7	7.37898e+06	1.40484e+07	202125	108100	1.14844e+07	1.00244e+07
C1_00530C	C1_00530C	Q5ABB5 [489-516]	Q5ABB5 1xPhospho [S/T]	Uncharacterized protein	10.2001	4.3262	4.72149	-1.15242	7957.03	7289.71	7.78005e+06	1.01567e+07	302551	99716.1	4.76317e+06	3.30602e+06
C1_00530C	C1_00530C	Q5ABB5 [489-516]	Q5ABB5 2xPhospho [T506; S/T]	Uncharacterized protein	8.08054	6.41611	5.38963	3.72521	4687.3	0	0	1.26911e+06	129963	66578.9	8.62827e+06	8.15587e+06							HANSPLLTPTSSSAQ
C1_00570C	C1_00570C	A0A1D8PC90 [765-777]	A0A1D8PC90 1xPhospho [S/T]	INCENP_ARK-bind domain-containing protein	1.46422	1.0623	0.689799	0.287876	2.96075e+06	5.38505e+06	5.92607e+06	1.71012e+07	8.58199e+06	4.88027e+06	1.1995e+07	1.61176e+07
C1_00570C	C1_00570C	A0A1D8PC90 [686-701]	A0A1D8PC90 1xPhospho [S/T]	INCENP_ARK-bind domain-containing protein	1.49042	1.1991	-0.367176	-0.658503	1.05056e+07	1.11224e+07	2.33208e+07	3.74477e+07	7.58456e+06	9.18358e+06	1.59926e+07	2.25064e+07
C1_00570C	C1_00570C	A0A1D8PC90 [200-211]	A0A1D8PC90 1xPhospho [S203]	INCENP_ARK-bind domain-containing protein	0.777732	-0.128918	0.150965	-0.755685	1.02716e+06	849308	1.35351e+06	1.86357e+06	846647	1.23682e+06	795361	1.11e+06							TIFKQDLSGSDLLPN
C1_00570C	C1_00570C	A0A1D8PC90 [311-318]	A0A1D8PC90 1xPhospho [S315]	INCENP_ARK-bind domain-containing protein	0.114738	1.16095	1.09358	2.13979	3.30374e+06	2.14939e+06	2.68745e+06	3.21707e+06	4.33381e+06	7.30334e+06	1.37101e+07	1.23111e+07		Y					KQKFEQMSPVKLPVD
C1_00570C	C1_00570C	A0A1D8PC90 [417-423]	A0A1D8PC90 1xPhospho [S419]	INCENP_ARK-bind domain-containing protein	0.892729	-23.1286	1.90301	-22.1183	905275	1.54682e+06	1.61265e+06	2.94012e+06	6.7329e+06	2.43776e+06	0	0		Y				Y	IGKYRSLSPVRKPLF
C1_00570C	C1_00570C	A0A1D8PC90 [430-443]	A0A1D8PC90 1xPhospho [S433]	INCENP_ARK-bind domain-containing protein	21.0853	1.29838	21.0224	1.23547	0	0	1.01125e+06	1.21364e+06	2.12995e+06	0	2.50318e+06	2.73548e+06			Y				FNSKTDDSPRSISAS
C1_00570C	C1_00570C	A0A1D8PC90 [702-716]	A0A1D8PC90 1xPhospho [S708]	INCENP_ARK-bind domain-containing protein	0.388822	0.139668	0.413335	0.164181	28477108	4.45926e+07	4.49406e+07	5.07314e+07	5.08626e+07	4.64488e+07	5.18378e+07	5.53654e+07							RNLPEIDSDEEGDFS
C1_00570C	C1_00570C	A0A1D8PC90 [766-777]	A0A1D8PC90 1xPhospho [S769]	INCENP_ARK-bind domain-containing protein	0.231084	18.8313	-18.2663	0.333996	0	315277	0	370045	0	0	466442	0							SAKRGQESPAATPNM
C1_00570C	C1_00570C	A0A1D8PC90 [765-777]	A0A1D8PC90 1xPhospho [S769]	INCENP_ARK-bind domain-containing protein	2.0623	2.82919	-1.35199	-0.585101	584849	1.5626e+06	4.39024e+06	4.57861e+06	0	841266	2.5684e+06	3.41025e+06							SAKRGQESPAATPNM
C1_00570C	C1_00570C	A0A1D8PC90 [295-305]	A0A1D8PC90 1xPhospho [T300]	INCENP_ARK-bind domain-containing protein	4.5121	-19.7212	1.83162	-22.4017	242835	0	2.4753e+06	3.06572e+06	864341	0	0	0							IKSELNNTPVSTKGE
C1_00570C	C1_00570C	A0A1D8PC90 [686-697]	A0A1D8PC90 1xPhospho [T694]	INCENP_ARK-bind domain-containing protein	21.4461	-0.456986	20.0408	-1.8623	0	0	1.20502e+06	1.6521e+06	657411	421253	0	785814		Y			Y		GNNVLPVTPTRISPR
C1_00570C	C1_00570C	A0A1D8PC90 [686-701]	A0A1D8PC90 2xPhospho [T694; S699]	INCENP_ARK-bind domain-containing protein	0.368441	1.30366	-2.12302	-1.1878	7.17625e+06	1.27945e+07	9.37768e+06	1.64037e+07	3.12016e+06	1.46444e+06	5.46108e+06	5.85622e+06		Y	Y		Y		GNNVLPVTPTRISPR	PVTPTRISPRNLPEI
C1_00590W	TUF1	Q5ABC3 [398-406]	Q5ABC3 1xPhospho [S398]	Elongation factor Tu	-0.99111	2.74893	-0.724737	3.0153	15.1633	21.2112	7.99205	9.81068	15.4714	6.14411	83.6044	67.4216							MVGELIKSCPLEVNQ
C1_00600W	APC1	A0A1D8PCA6 [229-239]	A0A1D8PCA6 1xPhospho [S231]	Anaphase promoting complex subunit 1	-18.5157	-0.859473	3.16094	20.8171	374776	0	0	0	1.72091e+06	1.63114e+06	1.21724e+06	630251							NQKRRYGSITTPNPS
C1_00620W	MOB2	Q5ABC6 [101-108]	Q5ABC6 1xPhospho [S/T]	CBK1 kinase activator protein MOB2	0.373275	-1.29891	2.06001	0.387817	691758	294929	790103	487943	1.85021e+06	2.26416e+06	913390	758822
C1_00620W	MOB2	Q5ABC6 [57-70]	Q5ABC6 1xPhospho [S/Y]	CBK1 kinase activator protein MOB2	1.59043	-0.828633	2.75064	0.331574	17613958	6.07028e+06	5.12892e+07	2.00334e+07	6.01891e+07	9.92094e+07	3.96708e+07	5.00805e+07
C1_00620W	MOB2	Q5ABC6 [74-100]	Q5ABC6 1xPhospho [S]	CBK1 kinase activator protein MOB2	0.463822	0.258544	1.22422	1.01895	13711026	2.20696e+06	1.05077e+07	1.14462e+07	1.95989e+07	1.75902e+07	2.19782e+07	2.25101e+07
C1_00620W	MOB2	Q5ABC6 [20-40]	Q5ABC6 1xPhospho [S35]	CBK1 kinase activator protein MOB2	0.998323	-0.557156	0.842287	-0.713191	5.15784e+06	2.66766e+06	1.01343e+07	5.49848e+06	6.26704e+06	7.76322e+06	4.91527e+06	4.62027e+06			Y				IYSHSNLSGNGLRRT
C1_00620W	MOB2	Q5ABC6 [42-52]	Q5ABC6 1xPhospho [S49]	CBK1 kinase activator protein MOB2	21.874	0.730316	21.1933	0.0496276	0	0	1.64812e+06	2.19536e+06	1.48375e+06	914068	1.61179e+06	2.36621e+06		Y	Y				TQSPTKFSPSKLSSK
C1_00620W	MOB2	Q5ABC6 [74-100]	Q5ABC6 2xPhospho [S97; Y/S]	CBK1 kinase activator protein MOB2	0.0932871	0.838209	0.062639	0.807561	8.02966e+06	5.89161e+06	6.94501e+06	7.90617e+06	1.12105e+07	3.32856e+06	1.57288e+07	1.02645e+07		Y					QQQSGSVSPSKRSSI
C1_00620W	MOB2	Q5ABC6 [42-52]	Q5ABC6 2xPhospho [T/S]	CBK1 kinase activator protein MOB2	1.1719	0.667149	0.721536	0.216785	2.61746e+07	2.81324e+07	6.09252e+07	6.1433e+07	5.02365e+07	3.93123e+07	5.4236e+07	8.79614e+07
C1_00620W	MOB2	Q5ABC6 [41-52]	Q5ABC6 2xPhospho [T/S]	CBK1 kinase activator protein MOB2	2.35719	-2.28487	2.39095	-2.2511	6773975	9.77297e+06	5.28808e+07	3.19007e+07	5.59115e+07	3.08779e+07	9.3815e+06	8.428e+06
C1_00660C	C1_00660C	Q5ABD1 [29-40]	Q5ABD1 1xPhospho [S33]	t-SNARE syntaxin	-1.5171	-1.06788	-0.0688342	0.380377	2988.53	4011.47	727.056	1718.01	4562.73	2111.08	0	3183.01							HNKHVNNSPALSTPK
C1_00730C	CMP1	A0A1D8PCA8 [462-467]	A0A1D8PCA8 1xPhospho [S464]	Serine/threonine-protein phosphatase (EC 3.1.3.16)	0.109526	-3.4917	1.07244	-2.52879	648.124	209.884	309.495	616.267	1275.29	530.199	159.593	0		Y					PPSSRITSPHKSTKL
C1_00750C	VPS27	Q5ABD9 [692-716]	Q5ABD9 1xPhospho [S/Y]	Vacuolar protein sorting-associated protein 27	0	11.6924	0	11.6924	0	0	0	0	0	0	0	3308.5
C1_00750C	VPS27	Q5ABD9 [755-770]	Q5ABD9 1xPhospho [S]	Vacuolar protein sorting-associated protein 27	-0.663813	-1.8456	2.43533	1.25354	2849.5	9892.11	2528.98	5513.26	56316.9	12605.5	5417.45	13758.7
C1_00750C	VPS27	Q5ABD9 [754-770]	Q5ABD9 1xPhospho [S]	Vacuolar protein sorting-associated protein 27	0.350378	-0.184838	1.76696	1.23175	2262.62	1337.89	2568.27	2022.28	8437.76	3818.51	8182.38	2599.93
C1_00750C	VPS27	Q5ABD9 [278-290]	Q5ABD9 1xPhospho [S]	Vacuolar protein sorting-associated protein 27	1.13228	-1.18438	3.16478	0.848112	465.68	1429.29	1440.29	2714.79	13846	3155.93	5134.4	2346.15
C1_00750C	VPS27	Q5ABD9 [754-770]	Q5ABD9 2xPhospho [S756; S/Y]	Vacuolar protein sorting-associated protein 27	-11.291	-5.16488	5.21055	11.3367	0	2504.7	0	0	58688.3	34092.3	0	2585.3	Y						QHYVRRASSSLPPNA
C1_00780C	HGC1	Q5ABE2 [1-11]	Q5ABE2 1xAcetyl [N-Term]; 1xPhospho [T9]	Hypha-specific G1 cyclin-related protein 1	23.8833	1.90919	22.2567	0.282563	0	0	5.62574e+06	9.84806e+06	2.36315e+06	2.64796e+06	9.27197e+06	9.54966e+06					Y		INITKPLTPKSISQQ
C1_00780C	HGC1	Q5ABE2 [757-777]	Q5ABE2 1xPhospho [S772]	Hypha-specific G1 cyclin-related protein 1	20.9725	0.956316	21.0082	0.991953	0	0	1.00104e+06	1.05655e+06	1.18743e+06	921620	1.57477e+06	2.51752e+06							TPISENDSPIYTKTR
C1_00830W	C1_00830W	A0A1D8PCB5 [90-100]	A0A1D8PCB5 2xPhospho [S94; S95]	Uncharacterized protein	-2.04084	-1.65209	-0.031806	0.356935	2.16707e+06	2.77513e+06	0	1.20107e+06	4.00451e+06	829925	0	1.53821e+06							LARSISRSSLISGKS	ARSISRSSLISGKSY
C1_00840C	NRM1	A0A1D8PCB2 [542-561]	A0A1D8PCB2 1xPhospho [S/T]	Nrm1p	-2.35252	-5.78214	-0.0817168	-3.51134	2.37706e+07	3.35698e+07	372667	1.08548e+07	3.13902e+07	2.27926e+07	597725	386886
C1_00840C	NRM1	A0A1D8PCB2 [15-28]	A0A1D8PCB2 1xPhospho [S]	Nrm1p	-1.68123	-3.16841	-0.678187	-2.16537	4.32237e+07	1.23951e+07	189165	1.71537e+07	1.99163e+07	1.48427e+07	3.20755e+06	658623
C1_00840C	NRM1	A0A1D8PCB2 [526-541]	A0A1D8PCB2 1xPhospho [S538]	Nrm1p	-0.73656	-9.39823	2.91336	-5.74832	3.31246e+06	1.28386e+06	38753	2.71981e+06	1.68666e+07	1.77606e+07	29638.9	21677.8		Y					DDNEDINSPSKQQDI
C1_00840C	NRM1	A0A1D8PCB2 [81-88]	A0A1D8PCB2 1xPhospho [S83]	Nrm1p	-2.69614	-22.1102	0.266789	-19.1473	2.10973e+06	1.65314e+06	0	580629	2.24125e+06	2.28596e+06	0	0							FSPLRAVSFSDYRST
C1_00840C	NRM1	A0A1D8PCB2 [15-28]	A0A1D8PCB2 2xPhospho [S/T]	Nrm1p	-1.20693	-6.9334	-1.87537	-7.60184	3.6351e+06	3.82923e+06	12022	3.22143e+06	1.52032e+06	514128	0	16644
C1_00840C	NRM1	A0A1D8PCB2 [542-561]	A0A1D8PCB2 2xPhospho [S/T]	Nrm1p	0	-20.3559	20.3559	0	0	0	0	0	680984	660979	0	0
C1_00850W	IHD2	Q5ABE9 [2-26]	Q5ABE9 1xAcetyl [N-Term]; 1xPhospho [T]	Ihd2p	0.0624084	0.85817	1.17219	1.96795	3042.68	6305.31	4177.55	5583.73	12203	8864.24	18590.7	19599.5
C1_00850W	IHD2	Q5ABE9 [2-26]	Q5ABE9 1xAcetyl [N-Term]; 2xPhospho [S2; T]	Ihd2p	-8.31764	2.97971	1.17253	12.4699	318.05	0	0	0	718.161	0	761.989	4909.95							XXXXXXMSTPTTPTT
C1_00860W	ATG3	Q5ABQ7 [268-277]	Q5ABQ7 1xPhospho [S272]	Autophagy-related protein 3 (Autophagy-related E2-like conjugation enzyme ATG3)	3.27568	-3.5032	3.84446	-2.93441	248.712	0	117.27	2300.07	1751.64	1834.41	0	315.352							QQKDESLSDDLSKLS
C1_00870W	LRO1	A0A1D8PCB0 [74-86]	A0A1D8PCB0 1xPhospho [S]	Phospholipid:diacylglycerol acyltransferase	-0.498015	0.678082	1.34822	2.52432	1662.45	1350.64	907.986	1225.23	4429.42	3243.38	6938.47	5338.68
C1_00870W	LRO1	A0A1D8PCB0 [33-45]	A0A1D8PCB0 1xPhospho [S39]	Phospholipid:diacylglycerol acyltransferase	-1.65249	-2.14257	2.57873	2.08864	100.94	0	0	31.4263	336.237	271.767	136.924	0							KDPVETTSFDTEDKI
C1_00870W	LRO1	A0A1D8PCB0 [74-86]	A0A1D8PCB0 1xPhospho [S83]	Phospholipid:diacylglycerol acyltransferase	-0.624723	-2.02072	2.02652	0.630515	264.054	167.129	175.924	103.366	1049.5	710.3	230.621	202.301							TSMSRTDSLQKKTHS
C1_00870W	LRO1	A0A1D8PCB0 [74-86]	A0A1D8PCB0 2xPhospho [S83; T/S]	Phospholipid:diacylglycerol acyltransferase	-0.120389	-2.45504	3.68892	1.35427	31.397	0	0	28.8033	298.463	118.348	0	75.1972							TSMSRTDSLQKKTHS
C1_00920W	C1_00920W	Q5ABF8 [3-13]	Q5ABF8 1xPhospho [S]	Uncharacterized protein	8.48603	-0.155477	2.39251	-6.24899	6995.36	2494.83	1.64038e+06	1.76268e+06	25082.9	24751.5	27417.2	17325.8
C1_00920W	C1_00920W	Q5ABF8 [5-15]	Q5ABF8 1xPhospho [S11]	Uncharacterized protein	7.7539	0.582067	2.84367	-4.32816	0	1138.39	0	245940	4247.64	3930.45	5399.38	6843.66							RNSPSVDSPRSRRVV
C1_00930C	SIN3	A0A1D8PCC3 [448-467]	A0A1D8PCC3 1xPhospho [S/Y]	Transcriptional regulator	-0.220916	-0.872316	1.14406	0.492657	1203.21	579.587	1102.51	427.018	1481.77	2459.45	825.113	1327.4
C1_00930C	SIN3	A0A1D8PCC3 [319-327]	A0A1D8PCC3 1xPhospho [S321]	Transcriptional regulator	-0.950868	-2.39116	2.12058	0.680292	102.154	89.4536	59.8634	38.7766	273.137	563.455	62.3017	96.3678							KIKTRFASQPDIYKQ
C1_00930C	SIN3	A0A1D8PCC3 [225-259]	A0A1D8PCC3 1xPhospho [T]	Transcriptional regulator	0.705144	-1.25452	1.46002	-0.499648	384.298	441.051	607.71	738.494	857.632	1414.75	641.295	310.554
C1_00930C	SIN3	A0A1D8PCC3 [239-259]	A0A1D8PCC3 1xPhospho [T241]	Transcriptional regulator	0.515688	0.0516568	1.19193	0.727903	98.6509	77.6547	79.3363	173.153	163.123	240.947	126.706	292.131							PNPIRVTTPTGTTTR
C1_00950C	CDC5	Q5ABG0 [389-401]	Q5ABG0 1xPhospho [S396]	Serine/threonine-protein kinase (EC 2.7.11.21)	-1.10979	0.27493	0.272345	1.65706	16285.5	0	5623.91	1921.63	0	19669.3	14761.7	9037.04			Y				TLLPSSLSPNDTRNK
C1_00950C	CDC5	Q5ABG0 [21-28]	Q5ABG0 1xPhospho [T25]	Serine/threonine-protein kinase (EC 2.7.11.21)	12.332	-14.4778	14.4778	-12.332	0	0	2622.99	2532.01	13768.8	9047.52	0	0		Y					NARANNITPVKSIRR
C1_00950C	CDC5	Q5ABG0 [362-370]	Q5ABG0 1xPhospho [T368]	Serine/threonine-protein kinase (EC 2.7.11.21)	-5.50603	-2.18599	-2.61893	0.701107	133212	1.99378e+06	31605.8	15197.5	135737	210511	40904.5	35186.7							KDSAGIYTPKNKNPV
C1_00950C	CDC5	Q5ABG0 [57-63]	Q5ABG0 1xPhospho [T57]	Serine/threonine-protein kinase (EC 2.7.11.21)	-7.85598	0.894873	-5.06702	3.68383	404285	3.24132e+07	85730.1	55920.2	327676	651315	1.30995e+06	510432							KLSALCKTPPSIVRT
C1_00950C	CDC5	Q5ABG0 [57-63]	Q5ABG0 2xPhospho [T57; S60]	Serine/threonine-protein kinase (EC 2.7.11.21)	0.541679	-3.18323	3.07789	-0.647017	4148.35	0	3224.18	2814.89	16613	18422.3	0	3856.19			Y				KLSALCKTPPSIVRT	ALCKTPPSIVRTRNG
C1_00960C	SET1	Q5ABG1 [99-120]	Q5ABG1 1xPhospho [S/T]	Histone-lysine N-methyltransferase, H3 lysine-4 specific (EC 2.1.1.43) (COMPASS component SET1) (SET domain-containing protein 1)	-8.94824	11.0745	-21.4186	-1.39588	2797659	5412.02	2873.22	2800.51	0	0	0	2155.47
C1_00960C	SET1	Q5ABG1 [370-381]	Q5ABG1 1xPhospho [S370]	Histone-lysine N-methyltransferase, H3 lysine-4 specific (EC 2.1.1.43) (COMPASS component SET1) (SET domain-containing protein 1)	0	0.550256	12.6372	13.1874	0	0	0	0	0	6369.46	3238.01	6089.54							ESVKKEKSVEHESTI
C1_00960C	SET1	Q5ABG1 [82-98]	Q5ABG1 1xPhospho [T/S]	Histone-lysine N-methyltransferase, H3 lysine-4 specific (EC 2.1.1.43) (COMPASS component SET1) (SET domain-containing protein 1)	-6.60427	0.497359	-6.46953	0.6321	7.16852e+06	55517.7	17140.6	57108.2	26017.1	55500.4	56815.7	58257
C1_00960C	SET1	Q5ABG1 [85-98]	Q5ABG1 1xPhospho [T/S]	Histone-lysine N-methyltransferase, H3 lysine-4 specific (EC 2.1.1.43) (COMPASS component SET1) (SET domain-containing protein 1)	-5.99867	-0.633441	-4.98859	0.376646	863736	13028.7	6779.1	6931.98	6352.82	21262.7	9600	8201.66
C1_00960C	SET1	Q5ABG1 [82-98]	Q5ABG1 2xPhospho [T/S]	Histone-lysine N-methyltransferase, H3 lysine-4 specific (EC 2.1.1.43) (COMPASS component SET1) (SET domain-containing protein 1)	-6.60814	-0.196639	-6.68948	-0.277982	1.7579e+07	136128	53402.5	128189	73041.2	98594.6	66395.9	83370.2
C1_00970W	C1_00970W	A0A1D8PCD5 [139-152]	A0A1D8PCD5 1xPhospho [S148]	Nefa_Nip30_N domain-containing protein	0.45811	0.638716	-0.184333	-0.00372706	3.03523e+06	6.35566e+06	4.01686e+06	8.88378e+06	5.44666e+06	2.81785e+06	5.51883e+06	7.34853e+06							ILTGYESSEDEDXXX
C1_00990C	NMA111	A0A1D8PCD2 [26-55]	A0A1D8PCD2 1xPhospho [S40]	Nma111p	0	8.93616	0	8.93616	0	0	0	0	0	0	0	488.838							EIEYVSESPHPIFDS
C1_01000C	C1_01000C	Q5A945 [93-109]	Q5A945 1xPhospho [S/T]	Origin recognition complex subunit 6	22.1243	0.961285	20.8633	-0.299775	0	0	1.47067e+06	3.10108e+06	0	1.9075e+06	2.70329e+06	1.0107e+06
C1_01000C	C1_01000C	Q5A945 [142-160]	Q5A945 1xPhospho [S154]	Origin recognition complex subunit 6	-0.413965	0.762477	0.883426	2.05987	2.84448e+06	2.71597e+06	3.33596e+06	837480	2.47476e+06	7.78289e+06	5.82688e+06	1.15742e+07							EDQVNGNSPDGQLKD
C1_01000C	C1_01000C	Q5A945 [161-169]	Q5A945 1xPhospho [S164]	Origin recognition complex subunit 6	-0.526051	0.225186	0.752483	1.50372	1.64613e+07	2.15118e+07	1.49824e+07	1.13881e+07	2.88386e+07	3.51343e+07	3.71199e+07	3.76598e+07							GQLKDVDSPFNPKKR
C1_01000C	C1_01000C	Q5A945 [93-109]	Q5A945 2xPhospho [T103; S107]	Origin recognition complex subunit 6	-20.5115	1.2647	0.551201	22.3274	648815	845986	0	0	1.3137e+06	876643	2.60141e+06	2.6615e+06							EQISAASTPVSSPKK	AASTPVSSPKKVKPP
C1_01040W	C1_01040W	Q5A942 [23-31]	Q5A942 1xPhospho [S26]	Peptide-methionine (R)-S-oxide reductase (EC 1.8.4.12)	1.68171	-2.29737	1.45876	-2.52033	1449.83	0	2157.59	2495.8	1950.62	2036.29	0	810.274							SEWRAILSPEQFRVL
C1_01060W	MBF1	Q5A940 [29-37]	Q5A940 1xPhospho [S31]	Multiprotein-bridging factor 1	-1.26288	-0.00687927	-0.248496	1.00751	242.865	459.773	105.971	186.243	458.353	132.952	269.13	319.357							ENVAKTSSQLNAARR
C1_01070C	C1_01070C	A0A1D8PCF1 [78-87]	A0A1D8PCF1 1xPhospho [S/T]	Uncharacterized protein	0.8462	-1.17849	1.19285	-0.831841	0	128676	129551	101778	294159	0	129963	0
C1_01070C	C1_01070C	A0A1D8PCF1 [144-161]	A0A1D8PCF1 1xPhospho [S152]	Uncharacterized protein	21.5303	1.76661	19.7089	-0.0548353	0	0	1.32065e+06	1.70812e+06	0	856948	1.844e+06	1.07181e+06							PLGNGYNSDDYIEQV
C1_01070C	C1_01070C	A0A1D8PCF1 [78-88]	A0A1D8PCF1 1xPhospho [S81]	Uncharacterized protein	-0.528776	-0.46998	1.62577	1.68456	206433	164938	257413	0	590941	555136	535647	291791						Y	FVYKRSQSPTQQSRK
C1_01070C	C1_01070C	A0A1D8PCF1 [23-42]	A0A1D8PCF1 1xPhospho [T27]	Uncharacterized protein	-0.620862	0.0377721	0.495728	1.15436	3.87266e+06	3.79493e+06	2.61042e+06	2.37568e+06	6.74181e+06	4.06974e+06	5.32723e+06	5.77112e+06							QAKLVHDTDDDEQAT
C1_01110C	ZPR1	Q5A934 [2-10]	Q5A934 1xAcetyl [N-Term]; 1xPhospho [S2]	Zinc finger-containing protein	1.43537	-5.46077	5.24739	-1.64875	116.451	51.7707	100.422	356.24	4194.52	2232.49	144.956	0							XXXXXXMSEEGAHID
C1_01110C	ZPR1	Q5A934 [2-11]	Q5A934 1xAcetyl [N-Term]; 1xPhospho [S2]	Zinc finger-containing protein	5.8789	-5.42566	10.218	-1.08655	6.22894	0	265.829	158.573	3719.54	4889.44	199.316	0							XXXXXXMSEEGAHID
C1_01110C	ZPR1	Q5A934 [277-298]	Q5A934 1xPhospho [S]	Zinc finger-containing protein	2.34361	-0.222196	3.12063	0.554829	109.219	127.426	260.248	944.966	908.75	1157.21	924.596	846.326
C1_01110C	ZPR1	Q5A934 [494-509]	Q5A934 1xPhospho [T508]	Zinc finger-containing protein	2.38385	2.51952	0.293743	0.429409	65.0923	41.0253	212.006	346.073	130.307	0	0	751.901							LGLNDIKTDXXXXXX
C1_01140C	C1_01140C	Q5A932 [118-128]	Q5A932 1xPhospho [S/T]	CBM21 domain-containing protein	-0.498958	-0.15073	1.58144	1.92967	8251.97	9182.02	5937.61	6398.7	41754	10422.4	22664.3	24335.8
C1_01140C	C1_01140C	Q5A932 [424-437]	Q5A932 1xPhospho [S]	CBM21 domain-containing protein	-0.933153	0.684643	1.37832	2.99612	5382.06	383.877	2485.86	533.355	4309.76	10681.3	13041.2	11054.6
C1_01140C	C1_01140C	Q5A932 [424-437]	Q5A932 1xPhospho [S]	CBM21 domain-containing protein	-0.449603	-1.53391	0.388697	-0.695612	4638.08	5107.86	3539.78	3596.36	10291.6	2468.2	2660.92	1744.89
C1_01140C	C1_01140C	Q5A932 [145-157]	Q5A932 1xPhospho [S155]	CBM21 domain-containing protein	0.612945	0.319177	1.99316	1.69939	11511.3	6344.23	13658.3	13650.1	55282.3	15804.9	43428.4	45261.6							AAISASNSPKLSPAD
C1_01140C	C1_01140C	Q5A932 [423-437]	Q5A932 1xPhospho [S426]	CBM21 domain-containing protein	-1.76966	-1.20794	2.01942	2.58114	1088.67	387.519	0	432.225	5287.76	700.058	1345.33	1246.14							SYLKRVASDSAIATT
C1_01140C	C1_01140C	Q5A932 [494-508]	Q5A932 1xPhospho [S494]	CBM21 domain-containing protein	-1.36014	-0.431117	2.08153	3.01056	3206.12	2549.54	1196.47	1044.99	16641.4	7723.1	10208.5	7862.01							LLSSLHKSPDLSEDY
C1_01140C	C1_01140C	Q5A932 [99-108]	Q5A932 1xPhospho [S99]	CBM21 domain-containing protein	-0.523785	-0.381994	0.254547	0.396338	12774.9	20389.9	11477	11590.3	30655	8909.49	16699	13661.6	Y						YKLVRKKSGELVKPS
C1_01140C	C1_01140C	Q5A932 [99-104]	Q5A932 1xPhospho [S99]	CBM21 domain-containing protein	0.347088	-3.01052	4.1681	0.810491	291.948	435.502	569.454	356.128	11880.5	1214.08	889.462	734.584	Y						YKLVRKKSGELVKPS
C1_01140C	C1_01140C	Q5A932 [98-104]; A0A1D8PQN2 [132-138]	Q5A932 1xPhospho [S99]; A0A1D8PQN2 1xPhospho [S133]	CBM21 domain-containing protein	1.58979	-11.4231	-1.41637	-14.4293	3540.22	3788.18	21654.5	406.332	2744.99	0			Y						YKLVRKKSGELVKPS
C1_01140C	C1_01140C	Q5A932 [78-93]	Q5A932 1xPhospho [T80]	CBM21 domain-containing protein	0.361391	-0.389388	1.5851	0.834321	1585.62	2097.35	1563.52	3168.14	7268.38	3783.56	3998.9	4438.5							ISNTKNDTPPVFSPE
C1_01140C	C1_01140C	Q5A932 [118-128]	Q5A932 2xPhospho [S120; S/T]	CBM21 domain-containing protein	0.671888	1.06469	1.44053	1.83333	607.643	0	406.363	562.3	775.683	875.295	983.917	2470.56						Y	YHKKRSLSLPSTPTY
C1_01140C	C1_01140C	Q5A932 [145-157]	Q5A932 2xPhospho [S153; S]	CBM21 domain-containing protein	-3.43174	-2.53138	3.14527	4.04563	3821.15	1496.89	0	491.919	37216.9	9842.22	4074.46	4064.67							RPAAISASNSPKLSP
C1_01220C	C1_01220C	Q5A924 [16-54]	Q5A924 1xPhospho [S/Y]	Uncharacterized protein	0	-17.8723	17.8723	0	0	0	0	0	236487	3445.31	0	0
C1_01220C	C1_01220C	Q5A924 [235-248]	Q5A924 1xPhospho [S]	Uncharacterized protein	-2.91133	1.54055	5.52163	9.97351	40381.4	0	5366.78	0	1.78913e+06	65971.1	5.34843e+06	48166.6
C1_01220C	C1_01220C	Q5A924 [235-250]	Q5A924 1xPhospho [S]	Uncharacterized protein	-0.243738	3.40298	4.16635	7.81307	10346.6	13372.6	8898.48	11133.5	400021	25884.4	4.47206e+06	33131.2
C1_01220C	C1_01220C	Q5A924 [76-84]	Q5A924 1xPhospho [S80]	Uncharacterized protein	2.17369	3.09754	4.09746	5.02131	0	9206.33	22719.8	18820.5	157612	0	1.3491e+06	0							NLKSLENSTLTKPTS
C1_01220C	C1_01220C	Q5A924 [146-158]	Q5A924 1xPhospho [T/S]	Uncharacterized protein	0.965683	2.71614	4.75397	6.50443	3120.92	0	3384.77	2711.32	76427	7810.47	548667	4874.59
C1_01270W	CTA9	A0A1D8PCF2 [185-194]	A0A1D8PCF2 1xPhospho [S185]	Cta9p	-21.1495	-20.9391	-0.210381	0	1.46559e+06	860549	0	0	1.05934e+06	951169	0	0							RYLEPLKSNDTLIDE
C1_01270W	CTA9	A0A1D8PCF2 [389-399]	A0A1D8PCF2 1xPhospho [S393]	Cta9p	-2.47142	0.367166	-0.523569	2.31502	885032	1.14992e+06	0	366928	1.41561e+06	0	1.1754e+06	650484							NQKEPVTSSRPSSRI
C1_01270W	CTA9	A0A1D8PCF2 [420-427]	A0A1D8PCF2 1xPhospho [S422]	Cta9p	-0.644694	-0.84235	0.186189	-0.0114671	8.07254e+06	7.47498e+06	4.82993e+06	5.1147e+06	9.18696e+06	8.5023e+06	6.82483e+06	3.04107e+06						Y	RTVSRSASMERVIXX
C1_01270W	CTA9	A0A1D8PCF2 [311-319]	A0A1D8PCF2 2xPhospho [S312; S316]	Cta9p	21.5769	0.144191	19.3269	-2.10589	0	0	1.06789e+06	2.0604e+06	657605	0	0	726726			Y				VIKISRQSPFHSPTK	SRQSPFHSPTKARRA
C1_01330C	DUT1	P0CY19 [137-158]	P0CY19 1xPhospho [S139]	Deoxyuridine 5'-triphosphate nucleotidohydrolase (dUTPase) (EC 3.6.1.23) (dUTP pyrophosphatase)	-0.416566	-0.462697	-0.0634442	-0.109575	681.872	0	168.712	341.9	302.145	350.347	473.193	0							NADIKEISLEELDNT
C1_01330C	DUT1	P0CY19 [2-10]	P0CY19 1xPhospho [S7]	Deoxyuridine 5'-triphosphate nucleotidohydrolase (dUTPase) (EC 3.6.1.23) (dUTP pyrophosphatase)	0.00961492	-8.37321	1.79181	-6.59101	65.8573	28.9058	33.527	61.8765	232.328	98.2508	0	0							XMTSEDQSLKKQKLE
C1_01370C	RPS21B	A0A1D8PCG7 [81-87]	A0A1D8PCG7 1xPhospho [S]	40S ribosomal protein S21	-2.13564	-1.44164	-0.894028	-0.200032	996.97	3766.16	418.883	664.274	1831.31	731.313	384.789	558.004
C1_01390C	HOT1	A0A1D8PCG5 [347-365]	A0A1D8PCG5 1xPhospho [S348]	GCR1_C domain-containing protein	-19.9809	20.7961	-19.9809	20.7961	0	1.03478e+06	0	0	0	0	1.68663e+06	134071							RRKQQKNSQEDTPAN
C1_01400C	C1_01400C	Q5A905 [19-44]	Q5A905 1xPhospho [S35]	Sphinganine kinase	-0.770045	1.08626	0.613624	2.46993	1.25777e+06	0	737556	0	1.92452e+06	0	2.55276e+06	1.53342e+06							PSLSPQISDHSNDAG
C1_01420C	CRL1	Q5A904 [258-271]	Q5A904 1xPhospho [S262]	Rho family GTPase	18.5112	19.8824	0	1.37112	0	0	163054	210571	0	0	427531	538929							ISRVLGGSNGGSGNH
C1_01420C	CRL1	Q5A904 [320-335]	Q5A904 1xPhospho [S324]	Rho family GTPase	1.16049	0.944756	1.70447	1.48874	513678	0	716515	431733	0	1.67413e+06	1.41263e+06	1.80985e+06							GYKANVESPYNQDEF
C1_01480C	RPS21	Q5A900 [172-180]	Q5A900 1xPhospho [S176]	Ribosomal 40S subunit protein S2	-1.02337	1.54344	-1.51179	1.05501	2067.92	628.326	958.175	367.782	650.189	294.67	1284.36	1471.71							RGKGIVASPVVKRLM
C1_01490W	C1_01490W	Q5A8Z9 [39-47]	Q5A8Z9 1xPhospho [S45]	Uncharacterized protein	0	-3.08447	3.08447	0	0	0	0	0	6.77981	0.702568	0	0							KEAVDEASEKGKEFI
C1_01490W	C1_01490W	Q5A8Z9 [61-71]	Q5A8Z9 1xPhospho [S70]	Uncharacterized protein	0.0282642	-1.81108	1.5659	-0.273439	169.941	96.9755	107.588	164.629	522.332	269.867	96.8123	128.232							LDEANDKSKEFLKEA
C1_01540W	C1_01540W	Q5A8Z2 [591-616]	Q5A8Z2 1xPhospho [S615]	UBA domain-containing protein	-0.479798	0.010445	0.965342	1.45559	5814.29	0	1925.55	2243.47	5516.85	5836.67	5367.03	6068.99							VSHSETQSLXXXXXX
C1_01540W	C1_01540W	Q5A8Z2 [591-616]	Q5A8Z2 3xPhospho [S601; S]	UBA domain-containing protein	-0.863163	-2.69822	3.49859	1.66353	0	774.718	0	425.448	6650.02	2116.63	1349.95	0							AEVSNDSSVDESFLV
C1_01550W	VPS17	Q5A8Z0 [203-212]	Q5A8Z0 1xPhospho [T204]	Vacuolar protein sorting-associated protein 17	-1.68997	0.335504	-0.43013	1.59535	319.076	295.563	0	189.807	221.53	234.395	399.942	175.614							VINTNRKTSVASGIM
C1_01560W	SIZ1	A0A1D8PCK0 [498-524]	A0A1D8PCK0 1xPhospho [S]	SUMO ligase	-0.437098	0.889708	-2.95221	-1.62541	6106.5	11261.3	5242.25	7585.64	1673.96	569.253	0	4157.08
C1_01560W	SIZ1	A0A1D8PCK0 [1393-1409]	A0A1D8PCK0 1xPhospho [S1406]	SUMO ligase	0.769838	0.188571	-0.177324	-0.75859	37333.8	32333.2	44408.5	74379.9	30121.8	31487.5	38572.9	31639.3		Y					TDTAAGQSPKKNHLV
C1_01560W	SIZ1	A0A1D8PCK0 [1393-1408]	A0A1D8PCK0 1xPhospho [S1406]	SUMO ligase	1.31903	-12.5944	1.49875	-12.4147	2187.38	0	3172.21	2286.74	2186.52	3996.79	0	0		Y					TDTAAGQSPKKNHLV
C1_01560W	SIZ1	A0A1D8PCK0 [589-604]	A0A1D8PCK0 1xPhospho [S602]	SUMO ligase	-0.0269608	0.909627	-0.567231	0.369357	52608.7	5947.68	41115.5	16356.7	5413.21	34106.8	40244.1	33997.5			Y				SISLSNLSPKNRESS
C1_01700W	ARP8	A0A1D8PCJ9 [163-171]	A0A1D8PCJ9 1xPhospho [S165]	Actin-related protein 8	1.63787	-2.12352	0.57995	-3.18144	154.652	169.95	438.043	574.25	282.625	203.085	77.4947	33.1987	Y						PTAGKRPSAETLQRR
C1_01710W	C1_01710W	A0A1D8PCJ6 [378-399]	A0A1D8PCJ6 1xPhospho [S/T]	Uncharacterized protein	-0.192072	0.27082	0.946505	1.4094	4.75322e+06	5.11515e+06	3.79978e+06	4.83847e+06	1.16859e+07	7.33243e+06	1.14459e+07	1.14996e+07
C1_01710W	C1_01710W	A0A1D8PCJ6 [434-450]	A0A1D8PCJ6 1xPhospho [S/T]	Uncharacterized protein	0.578199	0.0315764	1.27518	0.728562	8531739	7.95439e+06	1.39801e+07	1.06335e+07	1.96981e+07	2.02032e+07	1.59577e+07	2.48266e+07
C1_01710W	C1_01710W	A0A1D8PCJ6 [400-412]	A0A1D8PCJ6 1xPhospho [S410]	Uncharacterized protein	0.550839	0.0513653	1.76073	1.26126	12662661	8.15948e+06	1.63378e+07	1.41653e+07	3.23777e+07	3.81824e+07	3.72105e+07	3.5907e+07							TTTTITTSPKSSTNT
C1_01740W	CTN1	Q59T80 [764-776]	Q59T80 1xPhospho [S]	Carnitine O-acetyltransferase	-0.282688	5.46711	-3.04057	2.70922	28.035	57.4728	13.2253	56.889	9.51361	0	247.319	216.747
C1_01740W	CTN1	Q59T80 [766-776]	Q59T80 1xPhospho [S768]	Carnitine O-acetyltransferase	-0.639027	1.6404	0.717278	2.9967	176.468	203.832	106.864	136.986	162.128	463.759	1051.25	902.078							DIKSRGQSPEPPFLN
C1_01740W	CTN1	Q59T80 [777-784]	Q59T80 1xPhospho [S779]	Carnitine O-acetyltransferase	1.08911	-2.09661	3.99093	0.805199	75.6084	39.9026	118.817	128.052	293.318	1558.17	258.054	174.07							PFLNRANSSFSVREI
C1_01740W	CTN1	Q59T80 [764-776]	Q59T80 2xPhospho [S764; S768]	Carnitine O-acetyltransferase	2.52062	-0.102064	6.94197	4.31929	0	0	4.73827	0	82.1272	39.8265	61.125	52.4309							MGEEDIKSRGQSPEP	DIKSRGQSPEPPFLN
C1_01770W	MAK32	A0A1D8PCJ7 [118-137]	A0A1D8PCJ7 1xPhospho [S122]	Mak32p	-19.7757	-1.5587	2.28958	20.5066	897587	0	0	0	2.43056e+06	1.95787e+06	0	1.48968e+06			Y				NNKSSNESIDNELEA
C1_01790W	SWI4	A0A1D8PCM9 [373-392]	A0A1D8PCM9 1xPhospho [S379]	SBF complex DNA-binding subunit	-10.4987	-0.957257	3.27297	12.8145	1445.89	0	0	0	4687.92	9297.26	3822.61	3379.76							KMQLQEPSPQADNGY
C1_01790W	SWI4	A0A1D8PCM9 [494-504]	A0A1D8PCM9 1xPhospho [T494]	SBF complex DNA-binding subunit	-11.2297	-2.0774	2.72483	11.8772	977.603	1422.9	0	0	7146.94	8728	2330.99	1429.67							NTDINGRTPLHYLCQ
C1_01790W	SWI4	A0A1D8PCM9 [657-682]	A0A1D8PCM9 1xPhospho [T659]	SBF complex DNA-binding subunit	0.125812	0.160966	1.0509	1.08605	5355.99	2077.31	2971.76	5138.97	6265.45	9136.08	11028.6	6191.01							STFTKVETPDTQRTT
C1_01790W	SWI4	A0A1D8PCM9 [657-664]	A0A1D8PCM9 1xPhospho [T659]	SBF complex DNA-binding subunit	0.961167	-1.16294	1.42584	-0.698264	1080.64	496.43	1359.62	1711.7	3536.84	701.97	1287.83	604.678							STFTKVETPDTQRTT
C1_01800W	C1_01800W	Q59T87 [195-205]	Q59T87 1xPhospho [S198]	Uncharacterized protein	-0.443377	-1.15974	0.469163	-0.247196	108393	80316.1	61616.8	77161.9	187427	73805	51636.3	65289.1							EYEKITLSDTQNEEK
C1_01830C	UBC8	Q59T91 [63-71]	Q59T91 1xPhospho [S65]	E2 ubiquitin-conjugating protein	0	-2.15197	8.509	6.35703	0	0	0	0	229.643	133.661	80.9704	0							QYPIKSPSIGFTNKI
C1_01860W	C1_01860W	Q59T94 [115-126]	Q59T94 1xPhospho [T/S]	Uncharacterized protein	-0.687423	-1.91122	0.582695	-0.641098	2993.1	1182.84	905.774	1686.94	3907.87	2346.69	1014.61	647.544
C1_01880C	PTR3	A0A1D8PCM3 [640-649]	A0A1D8PCM3 1xPhospho [S643]	Ptr3p	17.4354	0	0	-17.4354	0	0	177243	0	0	0	0	0			Y				NDMKSLNSADESEKY
C1_01930W	C1_01930W	A0A1D8PCL8 [331-353]	A0A1D8PCL8 1xPhospho [S/T]	AMPK1_CBM domain-containing protein	1.33232	-0.491727	2.977	1.15295	1730.58	0	1072.44	3286.8	8101.68	5530.81	4008.25	5686.52
C1_01930W	C1_01930W	A0A1D8PCL8 [291-318]	A0A1D8PCL8 1xPhospho [S]	AMPK1_CBM domain-containing protein	0.688492	-2.2913	1.387	-1.5928	1768.59	0	1821.48	1029.39	3434.13	1192.94	0	944.475
C1_01930W	C1_01930W	A0A1D8PCL8 [191-211]	A0A1D8PCL8 1xPhospho [S204]	AMPK1_CBM domain-containing protein	7.96708	0.795848	9.00698	1.83575	0	0	249.224	0	252.045	261.437	630.183	262.007							DIISDIDSHGDNVPK
C1_01930W	C1_01930W	A0A1D8PCL8 [291-304]	A0A1D8PCL8 1xPhospho [S298]	AMPK1_CBM domain-containing protein	-1.61022	-3.01105	0.662663	-0.738173	237.343	1958.47	246.421	472.144	2585.32	891.247	213.935	216.443							PVLLPHDSESTLERT
C1_01930W	C1_01930W	A0A1D8PCL8 [319-330]	A0A1D8PCL8 1xPhospho [S326]	AMPK1_CBM domain-containing protein	-1.09919	-3.32291	3.56808	1.34435	1957.14	1203.63	602.413	872.44	30392	7106.91	2175.73	1570.71					Y		IPGHYPSSPEHKSSS
C1_01930W	C1_01930W	A0A1D8PCL8 [112-127]	A0A1D8PCL8 2xPhospho [S118; T122]	AMPK1_CBM domain-containing protein	-10.1804	-11.483	1.30261	0	513.962	645.396	0	0	2108.43	752.879	0	0							KENAPESSLSETTVA	PESSLSETTVALKPE
C1_01930W	C1_01930W	A0A1D8PCL8 [331-353]	A0A1D8PCL8 2xPhospho [T/S]	AMPK1_CBM domain-containing protein	0	-11.9808	11.9808	0	0	0	0	0	1776.21	2264.54	0	0
C1_01940C	C1_01940C	Q59TA2 [118-137]	Q59TA2 1xPhospho [T/S]	Signal recognition particle subunit	-1.22401	-1.39514	0.549796	0.37866	4654.68	6966.88	1726.4	3248.12	5767.98	11245	3669.23	2798.62
C1_01940C	C1_01940C	Q59TA2 [118-137]	Q59TA2 2xPhospho [S122; T126]	Signal recognition particle subunit	0	-10.1095	10.1095	0	0	0	0	0	429.792	673.926	0	0							YEKPIEPSLENTPIP	IEPSLENTPIPESEN
C1_01980W	HGT1	A0A1D8PCL1 [531-545]	A0A1D8PCL1 1xPhospho [S]	High-affinity glucose transporter 1	-1.33511	-0.765815	-0.157374	0.411926	5231.65	11769.8	2291.52	4446.59	11955.2	3289.14	8823.76	141.366
C1_01980W	HGT1	A0A1D8PCL1 [531-545]	A0A1D8PCL1 1xPhospho [S]	High-affinity glucose transporter 1	0.577262	-3.13293	2.22161	-1.48858	16988.3	3060.87	16158.1	13756	57666.5	35849.2	7212.11	3447.55
C1_01980W	HGT1	A0A1D8PCL1 [505-520]	A0A1D8PCL1 1xPhospho [S514]	High-affinity glucose transporter 1	0	-8.18739	8.18739	0	0	0	0	0	239.29	51.2166	0	0							QPTVPIASDAELARK
C1_01980W	HGT1	A0A1D8PCL1 [531-545]	A0A1D8PCL1 2xPhospho [S536; S538]	High-affinity glucose transporter 1	-2.03883	-3.82175	2.46655	0.683635	1013.38	158.121	215.654	68.6856	2810.98	3668.65	366.843	90.4648							DKLMNEDSNSESREN	LMNEDSNSESRENQA
C1_01980W	HGT1	A0A1D8PCL1 [531-545]	A0A1D8PCL1 2xPhospho [S538; S]	High-affinity glucose transporter 1	0.523576	-3.8314	3.97137	-0.383605	3773.98	1609.7	4620.86	3118.69	49288.4	35172.3	3186.15	2746.13							LMNEDSNSESRENQA
C1_02040C	C1_02040C	A0A1D8PCM4 [681-694]	A0A1D8PCM4 1xPhospho [S]	Putative ubiquitin-specific protease	0	-20.4614	20.4614	0	0	0	0	0	0	1.44376e+06	0	0
C1_02040C	C1_02040C	A0A1D8PCM4 [681-696]	A0A1D8PCM4 1xPhospho [S]	Putative ubiquitin-specific protease	13.2018	-22.3258	22.3258	-13.2018	0	0	4171.96	5248.68	15004.8	5.24196e+06	0	0
C1_02050C	PHO91	Q59VZ6 [204-211]	Q59VZ6 1xPhospho [S204]	Pho91p	-0.643994	-10.2477	8.81062	-0.793097	54651.8	0	17638	17335.5	1.49175e+07	9.62249e+06	6487.99	13694.9							HQLRHTRSIDDYATK
C1_02070W	HSP31	Q59VZ4 [296-306]	Q59VZ4 1xPhospho [S300]	Hsp31p	-1.49644	-20.4298	-0.571014	-19.5044	1.48954e+06	608853	555504	188221	1.23477e+06	177746	0	0							HVKSEAESIHENEKA
C1_02110C	HGT2	Q59VZ0 [531-541]	Q59VZ0 1xPhospho [S]	Hgt2p	-2.31867	1.14297	-0.798274	2.66337	597.301	1046.37	137.049	191.627	936.674	8.06995	1205.18	882.365
C1_02110C	HGT2	Q59VZ0 [531-541]	Q59VZ0 1xPhospho [S]	Hgt2p	0.506505	-1.55161	1.18739	-0.870727	1376.35	735.26	1653.38	1346.81	4372.4	437.878	1066.82	573.444
C1_02110C	HGT2	Q59VZ0 [8-15]; A0A1D8PCL1 [8-15]	Q59VZ0 1xPhospho [S10]; A0A1D8PCL1 1xPhospho [S10]	Hgt2p	2.12441	-8.42779	0.861188	-9.69101	88.7866	99.7849	508.536	317.045	167.881	175.482									SKIERIFSGPALKIN
C1_02110C	HGT2	Q59VZ0 [505-521]	Q59VZ0 1xPhospho [S514]	Hgt2p	-1.7954	-9.52238	0.402568	-7.32441	222.405	332.93	68.904	90.3714	560.033	174.363	0	0							QPTIPIASDAELARK
C1_02110C	HGT2	Q59VZ0 [531-541]	Q59VZ0 2xPhospho [S536; S538]	Hgt2p	1.06167	-9.3451	1.96964	-8.43712	77.2804	87.7676	207.895	137.704	537.171	112.192	0	0							DKLMNDDSNSESKEN	LMNDDSNSESKENQV
C1_02110C	HGT2	Q59VZ0 [531-545]	Q59VZ0 3xPhospho [S536; S538; S540]	Hgt2p	0	-9.23029	9.23029	0	0	0	0	0	363.332	236.28	0	0							DKLMNDDSNSESKEN	LMNDDSNSESKENQV	NDDSNSESKENQVXX
C1_02130C	GAL1	Q59VY8 [411-424]	Q59VY8 1xPhospho [S418]	Galactokinase	-2.00769	-1.0249	0.450926	1.43371	76.432	72.9542	10.7103	25.6864	127.343	77.2221	52.0513	47.9725							FGELMNQSQSDLDKL
C1_02150W	GAL10	A0A1D8PCN0 [545-557]	A0A1D8PCN0 1xPhospho [S550]	Bifunctional UDP-glucose 4-epimerase/aldose 1-epimerase	0	-5.07668	5.07668	0	0	0	0	0	20.7483	11.9986	0	0							DKMLEVDSQLLPTGK
C1_02210W	C1_02210W	A0A1D8PCQ8 [457-467]	A0A1D8PCQ8 1xPhospho [S/T]	Uncharacterized protein	-0.204188	-2.78271	0.630445	-1.94808	2.0509e+06	495687	1.29323e+06	917276	2.08666e+06	1.85556e+06	572877	0
C1_02210W	C1_02210W	A0A1D8PCQ8 [164-182]	A0A1D8PCQ8 1xPhospho [S]	Uncharacterized protein	0.517985	-1.75089	2.63411	0.365235	0	1.10729e+06	0	1.58559e+06	6.87396e+06	0	2.04238e+06	0
C1_02210W	C1_02210W	A0A1D8PCQ8 [541-552]	A0A1D8PCQ8 1xPhospho [S549]	Uncharacterized protein	0.114292	-0.637311	0.557625	-0.193978	1.62542e+07	1.17937e+07	1.49541e+07	1.54063e+07	2.05094e+07	2.07728e+07	1.54876e+07	1.10532e+07		Y			Y		LPPLPPPSPPKIHGE
C1_02210W	C1_02210W	A0A1D8PCQ8 [80-91]	A0A1D8PCQ8 1xPhospho [S82]	Uncharacterized protein	-21.1718	-20.5053	-0.666526	0	538361	1.82405e+06	0	0	816079	672293	0	0							NDKRRIVSAPPGTYI
C1_02230W	SEP7	Q59VX8 [444-458]	Q59VX8 1xPhospho [S/T]	Septation protein 7 (Seventh homolog of septin 1)	-2.56159	-0.99671	-0.459778	1.10511	748.027	661.189	0	237.874	494.153	530.213	298.542	214.311
C1_02230W	SEP7	Q59VX8 [461-479]	Q59VX8 1xPhospho [S/T]	Septation protein 7 (Seventh homolog of septin 1)	-0.652179	1.09284	-1.11196	0.633057	34489.5	56342.8	23236.3	34561.7	24833.2	17191.1	47739.3	41897.1
C1_02230W	SEP7	Q59VX8 [12-28]	Q59VX8 1xPhospho [S]	Septation protein 7 (Seventh homolog of septin 1)	-1.88414	0.35927	-1.50913	0.734281	532.327	1308.32	126.466	371.445	363.515	282.497	455.753	373.218
C1_02230W	SEP7	Q59VX8 [657-670]	Q59VX8 1xPhospho [S]	Septation protein 7 (Seventh homolog of septin 1)	-1.30631	-0.499557	-1.06221	-0.255458	9114.3	4022.53	1415.73	3895.6	3846.5	2444.18	2341.97	2107.29
C1_02230W	SEP7	Q59VX8 [444-458]	Q59VX8 1xPhospho [S]	Septation protein 7 (Seventh homolog of septin 1)	-0.262612	0.259275	-0.745166	-0.22328	6344.77	5881.76	4769.71	5421.89	3851.45	3442.49	5206.75	3523.39
C1_02230W	SEP7	Q59VX8 [504-511]	Q59VX8 1xPhospho [S506]	Septation protein 7 (Seventh homolog of septin 1)	-1.00066	0.49896	-1.31653	0.183093	8540.62	6201.54	2720.38	4646.81	3810.23	2108.15	4425.27	3938.96	Y						NNAFKRLSIGPQRNQ
C1_02230W	SEP7	Q59VX8 [505-511]	Q59VX8 1xPhospho [S506]	Septation protein 7 (Seventh homolog of septin 1)	-0.780413	-0.482672	-0.794797	-0.497056	15265.5	17055.4	6912.02	11904.8	6435.26	12194.9	7070.92	6261.47	Y						NNAFKRLSIGPQRNQ
C1_02230W	SEP7	Q59VX8 [516-526]	Q59VX8 1xPhospho [S518]	Septation protein 7 (Seventh homolog of septin 1)	-0.687753	0.389052	-0.427813	0.648992	443.949	0	0	275.233	139.566	190.204	146.973	285.18							RNQLRQISETVPYVL
C1_02230W	SEP7	Q59VX8 [579-589]	Q59VX8 1xPhospho [S586]	Septation protein 7 (Seventh homolog of septin 1)	-2.70157	-2.21413	-2.49258	-2.00513	730.858	1499.81	0	342.065	395.542	0	84.4616	0							QEESATSSLHRKDSD
C1_02230W	SEP7	Q59VX8 [579-590]	Q59VX8 1xPhospho [S586]	Septation protein 7 (Seventh homolog of septin 1)	0.364641	-0.169616	-0.5353	-1.06956	149.057	58.4297	64.9647	202.475	114.074	28.7849	70.6091	56.2931							QEESATSSLHRKDSD
C1_02230W	SEP7	Q59VX8 [590-607]	Q59VX8 1xPhospho [S592]	Septation protein 7 (Seventh homolog of septin 1)	0.318301	0.67556	-0.457343	-0.100083	5772.45	5708.45	4981.55	9333.78	5449.16	2912.41	7633.93	5721.91	Y						SSLHRKDSDISGSVQ
C1_02230W	SEP7	Q59VX8 [591-607]	Q59VX8 1xPhospho [S600]	Septation protein 7 (Seventh homolog of septin 1)	-0.186713	-3.49495	0.9738	-2.33444	3843.26	423.283	1661.68	2086.81	4251.9	4128.59	353.416	389.005			Y				DISGSVQSGGVDDGK
C1_02230W	SEP7	Q59VX8 [69-77]	Q59VX8 1xPhospho [S70]	Septation protein 7 (Seventh homolog of septin 1)	-0.183039	-0.931659	0.905321	0.156701	908.62	500.397	621.65	619.357	1374.64	1265.26	703.238	680.271							NHRYEKLSPTVGDTK
C1_02230W	SEP7	Q59VX8 [590-607]	Q59VX8 2xPhospho [S592; S595]	Septation protein 7 (Seventh homolog of septin 1)	8.77834	-6.9769	6.9769	-8.77834	0	0	128.105	309.974	124.967	0	0	0	Y						SSLHRKDSDISGSVQ	HRKDSDISGSVQSGG
C1_02230W	SEP7	Q59VX8 [657-670]	Q59VX8 2xPhospho [S668; T/S]	Septation protein 7 (Seventh homolog of septin 1)	-0.456859	-0.141352	-0.936919	-0.621412	1805.19	1168.14	667.29	1498.72	1090.44	462.191	1030.09	377.546			Y				TDLHSIVSNHXXXXX
C1_02230W	SEP7	Q59VX8 [461-479]	Q59VX8 2xPhospho [T/S]	Septation protein 7 (Seventh homolog of septin 1)	-1.7221	0.275679	-1.05688	0.9409	1314.73	3497.49	807.753	650.168	1004.59	1307.99	1480.84	1318.89
C1_02230W	SEP7	Q59VX8 [444-458]	Q59VX8 2xPhospho [T/S]	Septation protein 7 (Seventh homolog of septin 1)	-0.676664	-0.734902	1.04967	0.991435	0	560.74	0	350.43	642.104	519.732	407.49	290.21
C1_02230W	SEP7	Q59VX8 [461-479]	Q59VX8 3xPhospho [S468; S470; S473]	Septation protein 7 (Seventh homolog of septin 1)	-7.62365	-0.897121	1.87196	8.59848	196.218	0	0	0	324.917	395.958	228.897	157.719			Y				NISSFTSSTSTVSLE	SSFTSSTSTVSLEGG	TSSTSTVSLEGGEKE
C1_02260C	AGE3	A0A1D8PCP6 [151-163]	A0A1D8PCP6 1xPhospho [T154]	Age3p	-1.22669	-1.55211	0.32944	0.00401927	442.825	597.25	65.2265	378.621	991.244	315.892	224.313	220.776							PVSRGRPTPVPLTNE
C1_02300W	C1_02300W	Q59VX1 [20-33]	Q59VX1 1xPhospho [S20]	Prefolding complex chaperone subunit	0.697777	-1.07184	3.61126	1.84164	666.435	320.912	1076.34	525.763	9261.7	2815.66	2585.5	3159.32							MDNQLNKSQAELSMV
C1_02310C	GON7	Q59W04 [3-18]	Q59W04 1xPhospho [T]	EKC/KEOPS complex subunit GON7	0	-1.99531	12.398	10.4027	0	0	0	0	3165.61	2230.47	0	1352.66
C1_02320C	C1_02320C	A0A1D8PCP7 [50-55]	A0A1D8PCP7 1xPhospho [S51]	Bifunctional fructose-2,6-bisphosphate 2-phosphatase/6-phosphofructo-2-kinase	-0.804279	0.240646	0.1989	1.24382	23164.5	29059.9	14025.7	15880	27868.6	32075.9	36736.7	34089.2	Y						LRTTKRWSFTSKTRP
C1_02330C	C1_02330C	A0A1D8PCQ5 [4-14]	A0A1D8PCQ5 1xPhospho [S11]	Ribosomal 60S subunit protein L26B	-0.214527	-2.22741	2.33945	0.326569	18.5311	4.19632	11.5399	7.90913	74.6852	44.4015	12.4596	12.184							ISQDVSSSRSKARKA
C1_02330C	C1_02330C	A0A1D8PCQ5 [18-27]	A0A1D8PCQ5 1xPhospho [S24]	Ribosomal 60S subunit protein L26B	0	-6.3719	6.3719	0	0	0	0	0	0	81.8196	0	0			Y				KAYFTASSVERRVLL
C1_02330C	C1_02330C	A0A1D8PCQ5 [29-37]	A0A1D8PCQ5 1xPhospho [S32]	Ribosomal 60S subunit protein L26B	0.254068	-1.46318	1.96572	0.248467	140.572	160.042	139.158	219.536	766.987	410.136	225.529	200.768							VERRVLLSAPLSKEL
C1_02330C	C1_02330C	A0A1D8PCQ5 [70-75]	A0A1D8PCQ5 1xPhospho [S72]	Ribosomal 60S subunit protein L26B	2.60211	-2.39847	4.50827	-0.492307	8.60554	15.1006	81.1441	67.8648	497.018	64.2325	47.2746	58.3648							GSEGKVNSVYRLKFA
C1_02330C	C1_02330C	A0A1D8PCQ5 [90-103]	A0A1D8PCQ5 1xPhospho [S90]	Ribosomal 60S subunit protein L26B	-5.09474	-2.43623	2.85976	5.51827	0	33.1719	0	0	199.825	47.2274	0	44.8317							DKLQKEKSNGASVPI
C1_02370C	C1_02370C	A0A1D8PCR0 [421-432]	A0A1D8PCR0 1xPhospho [S/T]	Uncharacterized protein	-0.240917	0.315819	0.247898	0.804635	1.19651e+07	1.67919e+07	1.15337e+07	1.28007e+07	1.59095e+07	1.82388e+07	2.11316e+07	2.13734e+07
C1_02370C	C1_02370C	A0A1D8PCR0 [300-310]	A0A1D8PCR0 1xPhospho [S]	Uncharacterized protein	0.0645359	-0.142071	1.46845	1.26185	2.6904e+06	880251	1.3662e+06	2.3678e+06	4.51166e+06	5.36922e+06	5.28641e+06	3.66782e+06
C1_02370C	C1_02370C	A0A1D8PCR0 [493-510]	A0A1D8PCR0 1xPhospho [S495]	Uncharacterized protein	-21.6127	-0.964642	0.177	20.8251	2.20532e+06	1.00152e+06	0	0	1.83141e+06	1.79402e+06	704037	1.15365e+06							PLIKKTLSYNHQLDE
C1_02370C	C1_02370C	A0A1D8PCR0 [588-600]	A0A1D8PCR0 1xPhospho [S593]	Uncharacterized protein	-0.712889	-0.349425	0.144162	0.507625	6.32016e+07	5.98273e+07	2.69383e+07	4.81213e+07	7.69277e+07	5.903e+07	5.10687e+07	5.56441e+07							HKPSLANSAPELNLK
C1_02370C	C1_02370C	A0A1D8PCR0 [974-985]	A0A1D8PCR0 1xPhospho [S977]	Uncharacterized protein	0.492111	-0.618756	2.25078	1.13992	3447186	1.43877e+06	3.84127e+06	3.03083e+06	8.92946e+06	1.43248e+07	6.15199e+06	8.99194e+06							TIMKSNNSYGSLNTS
C1_02420C	GSC1	A0A1D8PCT0 [912-918]	A0A1D8PCT0 1xPhospho [S913]	1,3-beta-glucan synthase	6.6097	-7.01788	7.01788	-6.6097	0	0	96.6601	0	0	128.596	0	0							GDDSEKLSEDGLKSK
C1_02420C	GSC1	A0A1D8PCT0 [956-965]	A0A1D8PCT0 1xPhospho [S958]	1,3-beta-glucan synthase	-6.15192	-1.34258	1.83222	6.64156	35.0312	35.0756	0	0	151.792	100.409	40.6613	58.1794							QTLYRTVSGFMNYAR
C1_02420C	GSC1	A0A1D8PCT0 [1543-1551]	A0A1D8PCT0 1xPhospho [T1545]	1,3-beta-glucan synthase	-1.78943	-0.0558525	-0.575611	1.15797	154.338	676.785	60.8492	178.872	450.53	106.827	216.698	319.456	Y						TGFKRKLTGDVSEKA
C1_02430C	C1_02430C	A0A1D8PCQ3 [549-593]	A0A1D8PCQ3 1xPhospho [S]	Eukaryotic translation initiation factor 2A (eIF-2A)	0.50538	0.14892	0.381985	0.0255252	2018.42	8944.06	4748.72	10812.9	8427.77	5858.11	9379.78	6459.64
C1_02430C	C1_02430C	A0A1D8PCQ3 [470-486]	A0A1D8PCQ3 1xPhospho [S475]	Eukaryotic translation initiation factor 2A (eIF-2A)	1.31898	0.709717	1.54886	0.939602	363.427	0	457.65	450.556	778.104	287.161	644.563	1098.29							ARGGGAGSGSGVASS
C1_02430C	C1_02430C	A0A1D8PCQ3 [494-507]	A0A1D8PCQ3 1xPhospho [S500]	Eukaryotic translation initiation factor 2A (eIF-2A)	0.392284	-0.159323	0.866843	0.315235	3519.26	2965.52	4297.92	4213.47	8264.89	3562.02	6447.8	4142.44			Y				RSNGSTPSPPPGLSR
C1_02430C	C1_02430C	A0A1D8PCQ3 [494-507]	A0A1D8PCQ3 2xPhospho [S500; S/T]	Eukaryotic translation initiation factor 2A (eIF-2A)	1.08334	-0.569471	4.44551	2.79271	78.3268	0	167.088	0	878.313	849.123	597.069	566.661			Y				RSNGSTPSPPPGLSR
C1_02440C	C1_02440C	A0A1D8PCR2 [88-101]	A0A1D8PCR2 1xPhospho [S]	Ubiquitin-specific protease	-0.576319	0.453608	-1.03355	-0.00362269	652149	1.32058e+06	670988	652068	471023	492668	839857	479881
C1_02440C	C1_02440C	A0A1D8PCR2 [88-101]	A0A1D8PCR2 2xPhospho [S90; S95]	Ubiquitin-specific protease	-0.242006	-0.956774	-0.0540645	-0.768832	82877.4	119303	58767.3	112190	152028	42716.1	38095.2	62237.9					Y		SFKRKSVSEPPLSPQ	SVSEPPLSPQPSEKK
C1_02480W	PMM1	P31353 [230-243]	P31353 1xPhospho [S237]	Phosphomannomutase (PMM) (EC 5.4.2.8)	-0.502223	0.771286	-1.45427	-0.180759	103.479	82.9279	58.2687	73.0439	0	67.3922	0	115.731							TIGHAVNSPDDTIRI
C1_02510W	C1_02510W	Q5AIB3 [159-170]	Q5AIB3 1xPhospho [S160]	Protein transport protein BOS1	-1.30367	-0.781456	2.20867	2.73088	201.523	197.688	0	161.124	1545.75	303.223	486.633	588.644							GLYHEKNSLERGSEQ
C1_02610W	IML1	Q5AIA4 [1170-1184]	Q5AIA4 1xPhospho [S]	Vacuolar membrane-associated protein IML1	-1.28108	-2.16456	3.39709	2.51361	1.11438e+06	0	0	458554	6.18462e+06	5.55514e+06	1.86776e+06	750794
C1_02610W	IML1	Q5AIA4 [1171-1184]	Q5AIA4 1xPhospho [S]	Vacuolar membrane-associated protein IML1	0.126815	-1.79983	2.24877	0.322122	1.42563e+06	2.12233e+06	2.34401e+06	1.52995e+06	8.22181e+06	8.64091e+06	2.41954e+06	2.42356e+06
C1_02610W	IML1	Q5AIA4 [1202-1214]	Q5AIA4 1xPhospho [S1210]	Vacuolar membrane-associated protein IML1	16.2706	-2.56102	20.0018	1.17014	0	0	79056.4	0	562737	487129	177905	0			Y				ETSSTTDSMGRKRKK
C1_02610W	IML1	Q5AIA4 [645-657]	Q5AIA4 1xPhospho [S651]	Vacuolar membrane-associated protein IML1	-3.02495	-0.293184	0.388842	3.1206	1.32482e+06	1.91216e+06	397686	0	765461	3.47286e+06	982718	2.47617e+06							KNSEEIKSPAPSVRS
C1_02610W	IML1	Q5AIA4 [90-105]	Q5AIA4 1xPhospho [S92]	Vacuolar membrane-associated protein IML1	-23.5858	0.0703559	0.141399	23.7976	7.72061e+06	4.86981e+06	0	0	7.27315e+06	6.61377e+06	7.43723e+06	7.14369e+06							ENLTKIISNNQNEED
C1_02610W	IML1	Q5AIA4 [1022-1060]	Q5AIA4 1xPhospho [Y1029]	Vacuolar membrane-associated protein IML1	21.9437	22.1205	0	0.176798	0	0	2.04267e+06	1.99101e+06	0	0	0	4.55956e+06							RGSDVIFYTGNLYDF
C1_02610W	IML1	Q5AIA4 [1170-1184]	Q5AIA4 2xPhospho [T/S]	Vacuolar membrane-associated protein IML1	0.136012	-0.640158	1.02093	0.244762	4.36569e+06	3.32168e+06	4.89062e+06	3.55674e+06	7.65833e+06	7.94109e+06	5.79034e+06	4.21891e+06
C1_02620C	HOM6	Q5AIA2 [104-113]	Q5AIA2 1xPhospho [S107]	Homoserine dehydrogenase (HDH) (EC 1.1.1.3)	-0.543834	-0.227597	-0.0868299	0.229406	14.8303	53.0098	22.7475	23.4731	31.8185	32.0006	37.4078	16.9513							TFIKEGISIATPNKK
C1_02660C	MGM101	Q5AI97 [49-63]	Q5AI97 1xPhospho [S60]	Mitochondrial genome maintenance protein MGM101	8.92497	-11.0062	11.0062	-8.92497	0	0	485.052	0	1342.42	713.393	0	0		Y					DASPASSSPPKESVS
C1_02720W	C1_02720W	Q5AI92 [282-290]	Q5AI92 1xPhospho [S284]	C2H2-type domain-containing protein	-9.06902	-1.44286	4.29864	11.9248	536.091	0	0	0	7183.89	3384.97	2346.23	1540.76							KKFPRVMSNPVLERL
C1_02750C	C1_02750C	A0A1D8PCV8 [150-165]	A0A1D8PCV8 1xPhospho [T/S]	Uncharacterized protein	-1.6935	1.84135	1.48148	5.01633	775.572	704.35	248.411	208.454	2386.8	1747.46	8398.75	6418.7
C1_02750C	C1_02750C	A0A1D8PCV8 [150-166]	A0A1D8PCV8 1xPhospho [T153]	Uncharacterized protein	5.03461	0.227312	7.40772	2.60042	0	0	0	31.777	0	168.803	108.173	89.6073							SFEKGESTPGPSGAS
C1_02790W	TIF34	Q5AI86 [200-213]	Q5AI86 1xPhospho [S202]	Eukaryotic translation initiation factor 3 subunit I (eIF3i) (Eukaryotic translation initiation factor 3 39 kDa subunit homolog) (eIF-3 39 kDa subunit homolog)	5.16415	-7.74641	7.74641	-5.16415	0	0	34.8562	0	185.592	28.1434	0	0							HNEEKNVSITDIQFA
C1_02790W	TIF34	Q5AI86 [12-17]	Q5AI86 1xPhospho [T14]	Eukaryotic translation initiation factor 3 subunit I (eIF3i) (Eukaryotic translation initiation factor 3 39 kDa subunit homolog) (eIF-3 39 kDa subunit homolog)	-0.452141	-4.61729	3.48676	-0.678386	23.0396	29.2661	16.4108	21.5534	483.755	112.82	23.3473	0				Y		Y	MGHERSLTQVKYNRE
C1_02790W	TIF34	Q5AI86 [241-254]	Q5AI86 1xPhospho [T251]	Eukaryotic translation initiation factor 3 subunit I (eIF3i) (Eukaryotic translation initiation factor 3 39 kDa subunit homolog) (eIF-3 39 kDa subunit homolog)	2.01959	1.22459	1.20306	0.408058	218.015	0	304.331	582.708	425.614	77.6199	613.386	563.952		Y					PMNTAAITPVKDFVI
C1_02810W	RAD16	Q5AI84 [125-144]	Q5AI84 1xPhospho [T/S]	DNA repair protein	-0.805824	1.49489	-5.52226	-3.22154	1.56127e+07	825633	9.2728e+06	130504	181545	176133	670934	337155
C1_02810W	RAD16	Q5AI84 [47-77]	Q5AI84 1xPhospho [Y/S]	DNA repair protein	0.31354	-2.19966	-4.87087	-7.38407	10385353	267520	1.31594e+07	79456.4	214312	149762	65513	13740.9
C1_02810W	RAD16	Q5AI84 [125-144]	Q5AI84 2xPhospho [S/T]	DNA repair protein	-20.5972	-1.38436	-3.06177	16.151	1.58623e+06	0	0	0	115449	74518.4	47253.4	25514.8
C1_02820W	LYS2	A0A1D8PCV7 [946-962]	A0A1D8PCV7 1xPhospho [S952]	L-aminoadipate-semialdehyde dehydrogenase	-1.43623	-0.534663	1.45062	2.35219	61.3654	46.6253	0	39.2755	199.885	97.0146	91.2266	113.419							KDVADSQSENLNYAE
C1_02820W	LYS2	A0A1D8PCV7 [911-919]	A0A1D8PCV7 1xPhospho [T913]	L-aminoadipate-semialdehyde dehydrogenase	-4.95759	-1.22328	2.3434	6.07771	30.073	0	0	0	81.6827	75.0118	30.8813	35.6604							GVIFKNPTVEQFAKE
C1_02830W	C1_02830W	A0A1D8PCU1 [348-368]	A0A1D8PCU1 1xPhospho [S/Y]	Uncharacterized protein	0.729355	2.71184	-2.57495	-0.592465	2.66077e+06	1.50178e+06	3.30243e+06	3.59866e+06	698588	0	3.66955e+06	907313
C1_02830W	C1_02830W	A0A1D8PCU1 [122-140]	A0A1D8PCU1 1xPhospho [S]	Uncharacterized protein	-0.435406	0.620916	-0.872545	0.183777	7.13092e+06	1.21104e+07	5.97232e+06	8.25638e+06	6.96838e+06	3.5409e+06	8.34597e+06	7.81575e+06
C1_02850W	VTS1	Q5AI80 [144-160]	Q5AI80 1xPhospho [S/T]	Protein VTS1	-1.46636	-1.90996	1.19793	0.754326	1671.12	1007.63	374.309	594.479	4626.28	1520.32	868.847	766.033
C1_02850W	VTS1	Q5AI80 [361-370]	Q5AI80 1xPhospho [S361]	Protein VTS1	-0.45624	-1.66623	-0.20942	-1.41941	12013.8	8334.9	4781.86	10049.7	10401.7	7197.52	2569.49	2974.9							DKVERPKSADPFVNN
C1_02850W	VTS1	Q5AI80 [506-516]	Q5AI80 1xPhospho [S508]	Protein VTS1	-0.820808	0	-9.58345	-8.76264	533.174	233.021	141.017	292.311	0	0	0	0							HSGVRNVSNFEESIN
C1_02850W	VTS1	Q5AI80 [517-529]	Q5AI80 1xPhospho [S522]	Protein VTS1	-0.554201	-1.47036	-0.573626	-1.48979	864.715	682.24	304.075	749.135	720.242	318.87	78.4088	295.959							NRSLNSSSVPASMHK
C1_02850W	VTS1	Q5AI80 [396-404]	Q5AI80 1xPhospho [T/S]	Protein VTS1	-2.92755	3.38701	-4.08637	2.22819	7965.7	1579.44	353.627	900.095	264.385	296.578	3338.81	2539.14
C1_02850W	VTS1	Q5AI80 [144-160]	Q5AI80 2xPhospho [T145; S156]	Protein VTS1	0	-7.47061	7.47061	0	0	0	0	0	176.369	0	0	0					Y		SDLLGKSTSSLLGDN	LGDNNPVSPIQKFSS
C1_02860C	YKT6	Q5AI79 [132-143]	Q5AI79 1xPhospho [S140]	Palmitoyltransferase	0.195649	0.0863288	2.42306	2.31374	65.9475	0	24.545	51.1259	292.927	65.1184	203.178	177.008							QDPTQADSIMKVQQE
C1_02860C	YKT6	Q5AI79 [169-175]	Q5AI79 1xPhospho [S171]	Palmitoyltransferase	-1.26054	-8.56834	0.943155	-6.36464	159.501	36.9268	45.3414	36.0625	302.663	75.937	0	0							QRGEKLDSLVDKSEA
C1_02900C	C1_02900C	A0A1D8PCV3 [15-24]	A0A1D8PCV3 1xPhospho [S17]	mRNA splicing protein	0	-21.2071	21.2071	0	0	0	0	0	1.68115e+06	739712	0	0							FSFKKSDSFNEFNTK
C1_02940C	C1_02940C	Q5AI68 [43-73]	Q5AI68 1xPhospho [S/T]	Uncharacterized protein	-3.01725	-0.128624	-1.37453	1.51409	5510.24	4642.9	403.886	849.297	2350.05	1565.17	1949.56	1631.62
C1_02940C	C1_02940C	Q5AI68 [54-73]	Q5AI68 1xPhospho [S]	Uncharacterized protein	-2.37473	0.356829	-2.18327	0.548288	20226.9	57295.3	7002.97	7943.45	6923.96	10143.8	10744.7	11112.6
C1_02940C	C1_02940C	Q5AI68 [146-172]	Q5AI68 1xPhospho [T/S]	Uncharacterized protein	-2.82991	-0.182677	-2.0387	0.608532	4761.27	15876.5	1442.63	1459.03	2152.39	2869.74	1988.63	2436.08
C1_02940C	C1_02940C	Q5AI68 [43-73]	Q5AI68 2xPhospho [T/S]	Uncharacterized protein	-2.76505	-2.46556	-0.101147	0.198347	1399.86	3909.04	421.882	358.248	2043.5	2905.87	895.255	0
C1_02980W	GOR1	A0A1D8PCW3 [198-205]	A0A1D8PCW3 1xPhospho [S200]	Glyoxylate reductase	-9.71505	0.391172	1.61999	11.7262	0	839.469	0	0	1426.78	1155.61	2376.52	1010.48							YYNRKQLSPELEKGA
C1_03010W	RPP1A	Q9HFQ7 [56-106]	Q9HFQ7 1xPhospho [S]	60S acidic ribosomal protein P1-A (CaRP1A)	-6.03949	-4.7574	-0.445221	0.836867	6.02992e+07	1.4411e+06	257949	680695	4.51461e+07	200390	1.01924e+06	657330
C1_03010W	RPP1A	Q9HFQ7 [94-105]	Q9HFQ7 1xPhospho [S96]	60S acidic ribosomal protein P1-A (CaRP1A)	-7.18854	-6.90543	-0.491427	-0.20832	1.97244e+06	21452.8	6094.38	7573.61	1.41335e+06	4951.34	4923.2	6906.92							EEEAKEESDDDMGFG
C1_03010W	RPP1A	Q9HFQ7 [94-105]	Q9HFQ7 1xPhospho [S96]	60S acidic ribosomal protein P1-A (CaRP1A)	-5.12232	-20.6102	0.428278	-15.0596	1.06159e+06	127936	2409.34	31740.6	1.58498e+06	15673.3	0	0							EEEAKEESDDDMGFG
C1_03010W	RPP1A	Q9HFQ7 [56-106]	Q9HFQ7 1xPhospho [S96]	60S acidic ribosomal protein P1-A (CaRP1A)	-0.224913	-1.5463	2.68338	1.362	0	136599	31378.8	85501.3	858592	18868.5	121328	179103							EEEAKEESDDDMGFG
C1_03010W	RPP1A	Q9HFQ7 [89-106]; Q5ANH5 [94-111]	Q9HFQ7 1xPhospho [S96]; Q5ANH5 1xPhospho [S101]	60S acidic ribosomal protein P1-A (CaRP1A)	6.10153	-17.2376	-2.09334	-25.4325	148424	511032	4.50089e+07	273586	32527.7	122007									EEEAKEESDDDMGFG
C1_03010W	RPP1A	Q9HFQ7 [94-106]; Q5ANH5 [99-111]	Q9HFQ7 1xPhospho [S96]; Q5ANH5 1xPhospho [S101]	60S acidic ribosomal protein P1-A (CaRP1A)	6.42393	-19.7017	-0.556704	-26.6823	460950	793285	1.06772e+08	917560	274162	578534									EEEAKEESDDDMGFG
C1_03010W	RPP1A	Q9HFQ7 [94-106]; Q5ANH5 [99-111]	Q9HFQ7 1xPhospho [S96]; Q5ANH5 1xPhospho [S101]	60S acidic ribosomal protein P1-A (CaRP1A)	6.7301	-21.87	-0.224327	-28.8245	814117	3.66368e+06	4.72788e+08	2.57614e+06	1.1047e+06	2.72827e+06									EEEAKEESDDDMGFG
C1_03020C	RPL13	O59931 [105-115]	O59931 1xPhospho [S105]	60S ribosomal protein L13	-3.03167	0.330479	-0.630962	2.73119	436.63	2241.62	153.724	172.91	1729.12	0	1150.58	1023.92							DHRRQNKSQETFDAN
C1_03020C	RPL13	O59931 [160-170]	O59931 1xPhospho [T167]	60S ribosomal protein L13	-4.4047	5.10521	-5.64412	3.86579	354.362	430.3	36.0927	0	0	14.7103	183.542	356.22							AVEVPEQTAYRTLRL
C1_03020C	RPL13	O59931 [74-81]	O59931 1xPhospho [T76]	60S ribosomal protein L13	-7.53681	-8.10606	0.56925	0	0	184.698	0	0	267.623	6.90689	0	0							VRAGRGFTLAELKAV
C1_03020C	RPL13	O59931 [105-115]	O59931 2xPhospho [S105; T108]	60S ribosomal protein L13	0	-9.02197	9.02197	0	0	0	0	0	518.856	0	0	0			Y				DHRRQNKSQETFDAN	RQNKSQETFDANVAR
C1_03030W	RPS16A	A0A1D8PCW6 [2-11]	A0A1D8PCW6 1xAcetyl [N-Term]; 1xPhospho [S/T]	Ribosomal 40S subunit protein S16A	-0.83332	-1.5026	1.98938	1.3201	127.622	160.762	79.4694	81.943	304.199	843.848	240.325	164.193
C1_03030W	RPS16A	A0A1D8PCW6 [14-22]	A0A1D8PCW6 1xPhospho [T]	Ribosomal 40S subunit protein S16A	-0.175454	-3.44141	2.09767	-1.16828	49.0079	0	13.1206	30.1608	71.7072	141.336	0	18.7031
C1_03050W	C1_03050W	A0A1D8PCY2 [998-1015]	A0A1D8PCY2 1xPhospho [S/T]	Uncharacterized protein	-8.1726	0.0933646	-9.39423	-1.12826	9.77268e+06	29913.4	9879.2	24093.5	6320.21	8246.7	7660.91	7879.94
C1_03050W	C1_03050W	A0A1D8PCY2 [988-997]	A0A1D8PCY2 1xPhospho [S992]	Uncharacterized protein	-7.50508	-0.814238	-8.31835	-1.6275	1.73747e+06	8066.95	2450.72	7157.23	2988.06	2479.32	1410.66	1698.26							DFRINNGSNPSIRSI
C1_03050W	C1_03050W	A0A1D8PCY2 [1042-1051]	A0A1D8PCY2 1xPhospho [T1044]	Uncharacterized protein	-8.82503	4.08942	-11.3321	1.58239	1.39477e+06	3301.86	1377.2	1704.51	0	541.305	5213.3	4017.39						Y	LNRSRSNTPRNSISQ
C1_03070C	ORC1	A0A1D8PCY1 [257-271]	A0A1D8PCY1 1xPhospho [S265]	Origin recognition complex subunit 1	-0.639591	0.521377	-5.46106	-4.30009	87116.1	9.06084e+06	100207	5.77182e+06	102975	104698	146969	151110							EIDNDVLSDQSEEKQ
C1_03070C	ORC1	A0A1D8PCY1 [336-348]	A0A1D8PCY1 1xPhospho [T345]	Origin recognition complex subunit 1	0.266719	0.469507	-4.43688	-4.23409	76225.8	4.79244e+06	57271.7	5.80006e+06	133155	91634	141384	169867		Y	Y				EDIYSVVTPTKRMKL
C1_03090W	RPS1	P40910 [175-187]	P40910 1xPhospho [S]	40S ribosomal protein S1 (S3aE)	-1.86984	-1.27917	-0.207491	0.383179	177.656	161.324	64.3726	27.6469	208.518	84.9186	82.9638	37.3534
C1_03090W	RPS1	P40910 [243-249]	P40910 1xPhospho [S245]	40S ribosomal protein S1 (S3aE)	0.280493	-1.3889	1.21056	-0.458836	38.7382	49.1578	40.6038	66.3702	166.898	37.8309	35.4963	42.0626	Y						EEKGKKVSSGFKDVV
C1_03090W	RPS1	P40910 [250-256]	P40910 1xPhospho [S255]	40S ribosomal protein S1 (S3aE)	-0.457144	-1.84113	-0.654205	-2.0382	66.3339	57.9317	30.8975	59.3493	47.0488	31.5481	21.2157	0							FKDVVLESVXXXXXX
C1_03100W	C1_03100W	A0A1D8PCX0 [1203-1220]	A0A1D8PCX0 1xPhospho [S]	Uncharacterized protein	-1.00578	-0.365448	0.210075	0.850408	2988.27	2866.61	1174.2	1741.02	4430.53	2342.25	2500.21	2756.78
C1_03100W	C1_03100W	A0A1D8PCX0 [1221-1240]	A0A1D8PCX0 1xPhospho [S]	Uncharacterized protein	-0.899688	-0.798007	-0.0836449	0.0180359	2354.84	2936.71	929.651	1906.17	3864.27	1129.15	1310.76	1560.75
C1_03100W	C1_03100W	A0A1D8PCX0 [1158-1183]	A0A1D8PCX0 1xPhospho [S1164]	Uncharacterized protein	7.49099	0.747305	6.9309	0.187216	0	0	59.2952	119.597	121.014	0	106.685	97.1343							KAVGGAASLATGAVG
C1_03100W	C1_03100W	A0A1D8PCX0 [1203-1220]	A0A1D8PCX0 2xPhospho [S]	Uncharacterized protein	-1.31962	-0.860227	1.02785	1.48725	730.8	578.495	141.698	382.258	1698.56	972.117	722.19	748.545
C1_03100W	C1_03100W	A0A1D8PCX0 [1221-1240]	A0A1D8PCX0 2xPhospho [S1222; S1224]	Uncharacterized protein	-0.810846	-0.0774643	-0.311956	0.421426	1234.79	937.876	394.038	844.056	1291.23	458.766	788.083	870.373			Y				AISQSKSSVSDDGGH	SQSKSSVSDDGGHNL
C1_03100W	C1_03100W	A0A1D8PCX0 [1203-1220]	A0A1D8PCX0 3xPhospho [S1210; S1214; S]	Uncharacterized protein	-7.35941	-9.61778	2.25837	0	163.211	0	0	0	505.088	279.582	0	0							NNNDDSSSLAPSAIS	DSSSLAPSAISQSKS
C1_03110W	RPL6	A0A1D8PCX8 [140-150]	A0A1D8PCX8 1xPhospho [S]	60S ribosomal protein L6	-1.81191	-6.97537	0.958973	-4.20449	16.7011	47.0305	0	17.4364	85.1392	39.6943	0	0
C1_03110W	RPL6	A0A1D8PCX8 [8-18]	A0A1D8PCX8 1xPhospho [S11]	60S ribosomal protein L6	-4.97104	-1.75036	2.4569	5.67758	30.3641	0	0	0	127.559	43.6412	50.1827	0							VAPKWYQSEDVPAPK
C1_03110W	RPL6	A0A1D8PCX8 [116-127]	A0A1D8PCX8 1xPhospho [S124]	60S ribosomal protein L6	0.0596209	0.187206	0.0289019	0.156487	272.579	281.75	194.555	383.204	442.724	122.842	323.689	320.378							EAEFFNESQPKKEIK
C1_03110W	RPL6	A0A1D8PCX8 [90-99]	A0A1D8PCX8 1xPhospho [S93]	60S ribosomal protein L6	-1.32646	-1.82781	2.77365	2.27229	74.8361	36.4794	17.8845	25.9009	630.986	136.067	152.04	63.3141							TSTKVNVSGVDVSKF
C1_03110W	RPL6	A0A1D8PCX8 [82-89]	A0A1D8PCX8 1xPhospho [T88]	60S ribosomal protein L6	-3.71049	0.730191	1.90671	6.3474	0	12.0909	0	0	0	48.0848	53.7619	26.6629							RYVIATSTKVNVSGV
C1_03130C	GGA2	A0A1D8PCX6 [281-297]	A0A1D8PCX6 1xPhospho [S286]	Phosphatidylinositol 4-phosphate-binding protein	-1.96967	-8.70936	-0.122781	-6.86247	454.763	0	58.4279	56.9332	417.579	0	0	0							NKMIEQSSDHDDNEE
C1_03140W	C1_03140W	Q5AI45 [2-21]	Q5AI45 1xAcetyl [N-Term]; 1xPhospho [S]	Uncharacterized protein	0.213153	-0.149434	0.193113	-0.169474	1.13061e+07	9.38718e+06	1.16078e+07	1.23803e+07	1.17503e+07	1.19069e+07	1.17836e+07	9.5458e+06
C1_03140W	C1_03140W	Q5AI45 [45-64]	Q5AI45 1xPhospho [S/T]	Uncharacterized protein	0.190698	0.34875	-0.130701	0.0273518	3.58037e+07	4.38075e+07	4.48598e+07	4.60018e+07	3.60979e+07	3.66181e+07	4.36991e+07	4.89016e+07
C1_03140W	C1_03140W	Q5AI45 [24-44]	Q5AI45 1xPhospho [S/T]	Uncharacterized protein	0.816244	0.0051384	0.887375	0.0762692	1.56518e+06	3.04074e+06	956010	7.15416e+06	5.64154e+06	2.87851e+06	4.78981e+06	3.76065e+06
C1_03140W	C1_03140W	Q5AI45 [45-65]	Q5AI45 1xPhospho [S]	Uncharacterized protein	-0.118193	-0.0620239	0.151744	0.207913	3.62103e+06	6.73339e+06	3.65449e+06	5.88546e+06	5.6168e+06	5.88606e+06	6.61222e+06	4.40659e+06
C1_03140W	C1_03140W	Q5AI45 [45-64]	Q5AI45 2xPhospho [S/T]	Uncharacterized protein	-0.907268	0.00464688	-0.750648	0.161267	2.02357e+07	3.74441e+07	1.26058e+07	1.81487e+07	1.98041e+07	1.44771e+07	2.18949e+07	1.24969e+07
C1_03150C	C1_03150C	A0A1D8PCZ2 [204-219]	A0A1D8PCZ2 1xPhospho [T]	Uncharacterized protein	2.09588	-0.897313	-1.92279	-4.91598	1719.34	1428.91	4578.99	8882.61	465.243	364.354	0	444.936
C1_03150C	C1_03150C	A0A1D8PCZ2 [204-221]	A0A1D8PCZ2 1xPhospho [T204]	Uncharacterized protein	-12.1207	0	-12.1207	0	2890.43	1561.93	0	0	0	0	0	0							SNPSGRKTPTANISN
C1_03200C	ARO80	A0A1D8PCY0 [23-37]	A0A1D8PCY0 1xPhospho [S23]	Aro80p	-0.983724	-2.33508	-0.259734	-1.61109	48550.8	10819.3	12152.4	17869	16225.1	33363.1	4304.76	5522.06			Y				APQTSVKSPEPSYQQ
C1_03240W	C1_03240W	A0A1D8PD02 [8-13]	A0A1D8PD02 1xPhospho [S11]	Uncharacterized protein	1.45471	-1.23609	1.30031	-1.39048	2145.96	2204.51	11926.4	0	1881.12	8834.76	1961.84	2586.72							DQTKFTLSPKSKGCY
C1_03260W	C1_03260W	A0A1D8PCY7 [36-49]	A0A1D8PCY7 1xPhospho [S39]	SsDNA-dependent ATPase	-18.4422	-21.6071	3.16493	0	356161	0	0	0	1.87502e+06	1.31936e+06	0	0							QESKKSPSEEASEDT
C1_03260W	C1_03260W	A0A1D8PCY7 [654-665]	A0A1D8PCY7 1xPhospho [S654]	SsDNA-dependent ATPase	-2.02379	-1.96208	1.22421	1.28592	995234	1.02743e+06	497393	0	2.30224e+06	2.42325e+06	758842	453994							YSDNFGKSFDENLPP
C1_03290W	NGG1	Q5AI28 [323-337]	Q5AI28 1xPhospho [S325]	Histone acetyltransferase	0.377706	-0.277859	-1.07654	-1.7321	15140.1	30108.9	27262.8	31528.4	13004.6	8450.38	8839.46	8856.74							TLGSKLNSPAFQQPS
C1_03290W	NGG1	Q5AI28 [373-388]	Q5AI28 1xPhospho [S377]	Histone acetyltransferase	1.18626	-3.2621	0.779175	-3.66918	86214.9	14331.5	170881	57926.5	83689.5	88863.9	9686.7	8298.41							SNREGGLSDEEDAPA
C1_03290W	NGG1	Q5AI28 [590-598]	Q5AI28 1xPhospho [S592]	Histone acetyltransferase	0.0618693	-0.533346	-0.487252	-1.08247	57533.8	58108.7	55584.5	65125.2	54257.3	28239.8	35399.4	21601.7							EKMKRVPSESILIRE
C1_03290W	NGG1	Q5AI28 [599-625]	Q5AI28 1xPhospho [S616]	Histone acetyltransferase	0	-1.50828	13.5332	12.0249	0	0	0	0	6693.45	5160.53	0	4166.38							DDNNENTSPAVDMLT
C1_03290W	NGG1	Q5AI28 [94-114]	Q5AI28 1xPhospho [T98]	Histone acetyltransferase	0.377099	0.153065	-0.616606	-0.840639	373988	255309	406241	411045	256358	154071	262902	193466							KRKNEELTPEHQDDE
C1_03290W	NGG1	Q5AI28 [94-114]	Q5AI28 1xPhospho [T98]	Histone acetyltransferase	0.692993	-0.302538	-0.45971	-1.45524	14782.4	12105.5	17105.2	26363.2	16661	2889.74	11244.3	4607.73							KRKNEELTPEHQDDE
C1_03290W	NGG1	Q5AI28 [92-114]	Q5AI28 1xPhospho [T98]	Histone acetyltransferase	10.3903	10.2505	0	-0.139798	0	0	1341.08	0	0	0	1217.13	0							KRKNEELTPEHQDDE
C1_03330C	ATG21	Q5AI22 [46-64]	Q5AI22 1xPhospho [S48]	Autophagy-related protein 21	-0.932532	-0.3793	-0.0773602	0.475872	5.15858e+06	4.36781e+06	808545	4.18269e+06	6.33246e+06	2.69656e+06	3.80754e+06	3.13406e+06							SPLRKSISNSLEDSA
C1_03340C	SEC62	Q5AI21 [2-20]	Q5AI21 1xAcetyl [N-Term]; 1xPhospho [T]	Translocation protein SEC62	-0.441527	-0.625751	1.50362	1.3194	711.104	504.296	389.484	505.218	1536.51	1911.63	1251.77	982.558
C1_03350C	RLI1	Q5AI20 [112-116]	Q5AI20 1xPhospho [T114]	Fe-S cluster-binding ribosome biosynthesis protein	2.67119	0	-6.18582	-8.85701	47.7046	24.0933	108.065	354.624	0	0	0	0							FKLHRLPTPRPGQVL
C1_03360W	C1_03360W	A0A1D8PCZ6 [954-975]	A0A1D8PCZ6 1xPhospho [S]	Chromatin-remodeling ATPase	-2.55048	0.728374	-0.0912687	3.18758	8942.71	11364.3	1387.97	2077.58	10609.2	8452.91	13044.8	18537.4
C1_03360W	C1_03360W	A0A1D8PCZ6 [109-120]	A0A1D8PCZ6 1xPhospho [S]	Chromatin-remodeling ATPase	-2.0479	-2.53183	1.84162	1.35769	4049.5	4053.46	764.009	1194.82	15710.6	13334	2404.53	2617
C1_03360W	C1_03360W	A0A1D8PCZ6 [111-120]	A0A1D8PCZ6 1xPhospho [S]	Chromatin-remodeling ATPase	-2.01783	-0.228931	-1.78243	0.00646611	39002.5	104946	11639.9	23904.5	15906.8	25937.4	14889.9	20814.1
C1_03360W	C1_03360W	A0A1D8PCZ6 [1294-1306]	A0A1D8PCZ6 1xPhospho [S]	Chromatin-remodeling ATPase	-0.321659	-1.73356	0.866349	-0.545556	13581.4	14769	7477.31	15207	18816.5	32868.3	7703.55	7837.79
C1_03360W	C1_03360W	A0A1D8PCZ6 [1312-1325]	A0A1D8PCZ6 1xPhospho [S1318]	Chromatin-remodeling ATPase	-0.537099	-11.896	2.04551	-9.31336	922.175	0	635.211	0	2518.23	1291.81	0	0							KRDLEYESMDEGSCK
C1_03360W	C1_03360W	A0A1D8PCZ6 [28-45]	A0A1D8PCZ6 1xPhospho [S34]	Chromatin-remodeling ATPase	-2.32119	-0.621061	-1.2587	0.441426	4155.96	22934.5	2099.9	3320.18	5864.26	5456.81	3850.74	3509.78							RGPAIVESDSEEDVA
C1_03360W	C1_03360W	A0A1D8PCZ6 [27-44]	A0A1D8PCZ6 1xPhospho [S34]	Chromatin-remodeling ATPase	-0.573611	10.6123	-9.88759	1.2983	946.244	0	0	635.484	0	0	814.766	749.595							RGPAIVESDSEEDVA
C1_03360W	C1_03360W	A0A1D8PCZ6 [28-44]	A0A1D8PCZ6 1xPhospho [S34]	Chromatin-remodeling ATPase	-0.111141	-1.40243	0.335972	-0.955313	0	1161	421.583	653.264	764.968	700.743	361.62	192.226							RGPAIVESDSEEDVA
C1_03360W	C1_03360W	A0A1D8PCZ6 [657-667]	A0A1D8PCZ6 1xPhospho [S659]	Chromatin-remodeling ATPase	-1.69999	-2.47161	1.35859	0.586964	624.819	1692.66	135.881	576.723	2610.84	3333.56	533.773	537.119		Y					KVLDKAGSPSRENTL
C1_03360W	C1_03360W	A0A1D8PCZ6 [109-120]	A0A1D8PCZ6 2xPhospho [S114; T/S]	Chromatin-remodeling ATPase	-1.33716	-1.48873	1.53175	1.38019	6046.21	8523.04	1963.07	3802.8	18311.2	23815.7	7112.27	7898.01							RKTKQSPSPPQELRF
C1_03360W	C1_03360W	A0A1D8PCZ6 [1294-1306]	A0A1D8PCZ6 2xPhospho [S1297; S]	Chromatin-remodeling ATPase	0	-13.5859	13.5859	0	0	0	0	0	5025.09	7269.58	0	0			Y				NQQRSSASASPALGH
C1_03360W	C1_03360W	A0A1D8PCZ6 [27-45]	A0A1D8PCZ6 2xPhospho [S34; S36]	Chromatin-remodeling ATPase	-2.61786	-2.25347	0.685124	1.04951	2147.46	2255	230.468	485.898	4990.98	2088.09	790.016	693.807							RGPAIVESDSEEDVA	PAIVESDSEEDVAPS
C1_03360W	C1_03360W	A0A1D8PCZ6 [28-44]	A0A1D8PCZ6 2xPhospho [S34; S36]	Chromatin-remodeling ATPase	-1.71419	-0.76886	0.0746895	1.02002	3107.85	7666.72	1869.4	1413.7	7543.25	3803.88	2670.45	3988.55							RGPAIVESDSEEDVA	PAIVESDSEEDVAPS
C1_03360W	C1_03360W	A0A1D8PCZ6 [27-44]	A0A1D8PCZ6 2xPhospho [S34; S36]	Chromatin-remodeling ATPase	-1.62087	-0.869614	-0.120353	0.630906	8232.96	13777.7	1788.83	5367.02	13686.1	6562.81	5977.63	5104.01							RGPAIVESDSEEDVA	PAIVESDSEEDVAPS
C1_03360W	C1_03360W	A0A1D8PCZ6 [28-45]	A0A1D8PCZ6 2xPhospho [S34; S36]	Chromatin-remodeling ATPase	-1.50367	-0.586084	-0.329424	0.588164	6415.92	9041.93	1866.07	3584.56	6916.24	5385.75	4845.52	3349.1							RGPAIVESDSEEDVA	PAIVESDSEEDVAPS
C1_03360W	C1_03360W	A0A1D8PCZ6 [954-975]	A0A1D8PCZ6 2xPhospho [S962; S967]	Chromatin-remodeling ATPase	-2.33937	-1.41805	0.227941	1.14927	5722.59	5550.01	825.7	1400.92	7664.14	5538.08	2392.97	2546.92			Y				ENGSSVPSDVEDSGE	VPSDVEDSGEDSRPL
C1_03370W	PAB1	Q5AI15 [2-15]	Q5AI15 1xAcetyl [N-Term]; 1xPhospho [T/S]	Polyadenylate-binding protein, cytoplasmic and nuclear (PABP) (Poly(A)-binding protein) (Polyadenylate tail-binding protein)	-1.14287	-1.7784	1.57483	0.939297	519.503	428.207	207.754	220.877	1818.92	1006.3	464.319	358.54
C1_03370W	PAB1	Q5AI15 [239-251]	Q5AI15 1xPhospho [S]	Polyadenylate-binding protein, cytoplasmic and nuclear (PABP) (Poly(A)-binding protein) (Polyadenylate tail-binding protein)	-0.918145	-0.78753	1.26364	1.39426	180.939	191.077	70.8499	125.546	602.941	291.674	289.687	228.175
C1_03370W	PAB1	Q5AI15 [540-554]	Q5AI15 1xPhospho [S]	Polyadenylate-binding protein, cytoplasmic and nuclear (PABP) (Poly(A)-binding protein) (Polyadenylate tail-binding protein)	-0.283136	3.00958	-3.25513	0.0375859	60.9208	30.382	65.3227	9.53201	8.66771	0	29.4414	47.4155
C1_03370W	PAB1	Q5AI15 [137-145]	Q5AI15 1xPhospho [S137]	Polyadenylate-binding protein, cytoplasmic and nuclear (PABP) (Poly(A)-binding protein) (Polyadenylate tail-binding protein)	-0.135662	2.17008	-0.573051	1.73269	0	16.0778	1.65151	12.8936	5.38116	5.09844	50.6637	0							RDPSARRSGDGNIFI
C1_03370W	PAB1	Q5AI15 [171-180]	Q5AI15 1xPhospho [T173]	Polyadenylate-binding protein, cytoplasmic and nuclear (PABP) (Poly(A)-binding protein) (Polyadenylate tail-binding protein)	-3.61101	-2.10153	3.95465	5.46413	11.2186	0	0	0	129.905	58.5438	21.7095	21.434							ILSCKVATDEFGQSK
C1_03380W	TPS2	Q5AI14 [2-19]	Q5AI14 1xPhospho [S17]	Trehalose-phosphatase	7.15943	0.22123	7.62818	0.689977	0	0	63.5309	78.4256	196.838	0	139.824	89.8014			Y				SANGSIPSPKEFEGK
C1_03400W	C1_03400W	A0A1D8PCZ8 [632-639]	A0A1D8PCZ8 1xPhospho [S637]	Arrestin_C domain-containing protein	0.289445	-22.9922	1.9937	-21.288	2.09499e+06	0	1.4511e+06	1.10933e+06	3.67011e+06	4.67334e+06	0	0							SKSDLESSLKLRFFH
C1_03400W	C1_03400W	A0A1D8PCZ8 [603-613]	A0A1D8PCZ8 1xPhospho [T/S]	Arrestin_C domain-containing protein	-0.59962	-0.443371	-0.362504	-0.206255	4165202	2.4284e+06	2.0771e+06	2.2742e+06	2.36703e+06	2.76156e+06	1.46973e+06	2.30191e+06
C1_03450C	C1_03450C	A0A1D8PD21 [738-744]	A0A1D8PD21 1xPhospho [S740]	Uncharacterized protein	18.706	-21.0554	21.0554	-18.706	0	0	427617	0	1.23973e+06	939467	0	0							QKNLREISQLSKGLS
C1_03460C	C1_03460C	A0A1D8PD17 [171-182]	A0A1D8PD17 1xPhospho [S177]	TEA domain-containing protein	-2.17792	0.0146219	-1.34962	0.842923	3318893	4.97057e+06	606220	1.22571e+06	3.25276e+06	0	1.97991e+06	1.30599e+06							KIEENNKSPSLDKAA
C1_03460C	C1_03460C	A0A1D8PD17 [202-219]	A0A1D8PD17 1xPhospho [S211]	TEA domain-containing protein	-1.65216	-0.85958	1.44286	2.23544	1.21627e+06	878678	0	666535	3.31016e+06	2.38515e+06	1.46875e+06	1.67001e+06							TDQSLTDSPNNSVAS
C1_03460C	C1_03460C	A0A1D8PD17 [648-654]	A0A1D8PD17 1xPhospho [T651]	TEA domain-containing protein	0	0.193789	20.0391	20.2329	0	0	0	0	599321	478042	0	1.23225e+06		Y					NSSRQWDTPSKSRLR
C1_03480C	AGE1	A0A1D8PD25 [211-218]	A0A1D8PD25 1xPhospho [S]	Age1p	1.59396	-0.0214646	1.61343	-0.00199466	976639	0	781455	2.1668e+06	1.79883e+06	1.18948e+06	1.53354e+06	1.41065e+06
C1_03480C	AGE1	A0A1D8PD25 [691-710]	A0A1D8PD25 1xPhospho [S701]	Age1p	1.19283	-21.4896	0.862341	-21.82	1.34191e+06	277691	2.17608e+06	1.52636e+06	2.26792e+06	676497	0	0							IIPGQDRSISPISLT
C1_03480C	AGE1	A0A1D8PD25 [701-710]	A0A1D8PD25 1xPhospho [S703]	Age1p	-0.47672	0.547947	1.68302	2.70768	3.77034e+07	2.93928e+07	2.58743e+07	2.23417e+07	1.04529e+08	1.10916e+08	1.83501e+08	1.31481e+08	Y					Y	PGQDRSISPISLTSK
C1_03480C	AGE1	A0A1D8PD25 [701-710]	A0A1D8PD25 2xPhospho [S703; T/S]	Age1p	-0.497315	1.14817	1.41439	3.05987	1.59061e+06	2.6164e+06	715304	2.26504e+06	6.53005e+06	4.68357e+06	2.48531e+07	0						Y	PGQDRSISPISLTSK
C1_03500W	YPT1	Q5AI00 [171-186]	Q5AI00 1xPhospho [T174]	Rab family GTPase	0	-8.98779	8.98779	0	0	0	0	0	0	506.683	0	0							RQIKAQMTNNANAGN
C1_03510C	C1_03510C	A0A1D8PD11 [80-90]	A0A1D8PD11 1xPhospho [S83]	Uncharacterized protein	-1.12215	-8.94707	1.49216	-6.33276	99.8319	74.6178	79.6032	0	357.217	135.339	0	0							LNIKNSVSTASLDCK
C1_03510C	C1_03510C	A0A1D8PD11 [95-108]	A0A1D8PD11 1xPhospho [S99]	Uncharacterized protein	0	-0.225045	7.40007	7.17502	0	0	0	0	105.161	62.7443	76.6666	66.8431							YGKTANGSGVFIYYP
C1_03520W	RPN3	A0A1D8PD15 [458-469]	A0A1D8PD15 1xPhospho [S462]	Proteasome regulatory particle lid subunit	0.894903	-5.82972	1.6395	-5.08512	0	17.255	0	32.9449	38.4807	17.3941	0	0							ANKEIEPSEEVELLK
C1_03640C	HFL1	Q5AHY9 [2-34]	Q5AHY9 1xAcetyl [N-Term]; 1xPhospho [S/T]	DNA polymerase epsilon noncatalytic subunit	0.141003	-1.3745	0.998618	-0.516888	33959.2	20822.3	26905.6	33500.5	37073.7	72385.4	21517.4	20698.8
C1_03640C	HFL1	Q5AHY9 [2-16]	Q5AHY9 1xAcetyl [N-Term]; 1xPhospho [S]	DNA polymerase epsilon noncatalytic subunit	0.887188	-1.27113	1.14209	-1.01623	14955.4	15804	26245.2	30647.2	19607.2	48280.1	11884.7	16242.8
C1_03640C	HFL1	Q5AHY9 [2-34]	Q5AHY9 1xAcetyl [N-Term]; 2xPhospho [S/T]	DNA polymerase epsilon noncatalytic subunit	-0.283744	-0.998431	0.719246	0.00455879	40577.2	24501.2	24232.4	29226.4	34789.4	72351.1	30396.6	23231.4
C1_03640C	HFL1	Q5AHY9 [188-210]	Q5AHY9 1xPhospho [S201]	DNA polymerase epsilon noncatalytic subunit	-0.208808	-7.95203	-0.602644	-8.34587	375.023	0	0	324.355	246.629	0	0	0							FPIANSASSKTPEGP
C1_03640C	HFL1	Q5AHY9 [17-34]	Q5AHY9 1xPhospho [T32]	DNA polymerase epsilon noncatalytic subunit	0.206849	-1.64009	0.649168	-1.19777	2855.8	2312.45	2169.53	3795.64	2081.63	6024.12	1165.82	1434.13			Y				QSEPSATTPKSDDQN
C1_03640C	HFL1	Q5AHY9 [2-34]	Q5AHY9 2xPhospho [S11; T21]	DNA polymerase epsilon noncatalytic subunit	-0.409969	-1.30051	0.628111	-0.262431	1347.9	715.787	628.05	924.916	927.361	2262.7	735.948	558.566							EEQSGHLSPQEPREE	EPREEALTVTSQSEP
C1_03690W	C1_03690W	A0A1D8PD30 [327-350]	A0A1D8PD30 1xPhospho [T/S]	GRASP55_65 domain-containing protein	-0.999264	-2.25729	-0.152692	-1.41071	136857	193194	84755.2	80353.9	239640	57263.4	35054.4	27046.7
C1_03690W	C1_03690W	A0A1D8PD30 [326-350]	A0A1D8PD30 1xPhospho [T/S]	GRASP55_65 domain-containing protein	-0.834761	-0.276156	-0.0829334	0.475672	193282	219895	94244.3	137414	330401	59694.6	58532.7	263603
C1_03690W	C1_03690W	A0A1D8PD30 [326-349]	A0A1D8PD30 1xPhospho [T339]	GRASP55_65 domain-containing protein	13.8605	0.885786	13.7968	0.822099	0	0	5316.52	9555.95	12560.8	1669.36	2028.79	24266.1							QPQNASGTPPPPPPP
C1_03710C	MSB1	A0A1D8PD52 [1004-1025]	A0A1D8PD52 1xPhospho [S1023]	Msb1p	-0.804345	20.5911	-20.1898	1.20562	1.19602e+06	0	684866	0	0	0	1.57955e+06	0							GTETGVQSPKHPYFM
C1_03710C	MSB1	A0A1D8PD52 [478-485]	A0A1D8PD52 1xPhospho [S480]	Msb1p	-0.999138	-0.00503504	0.797632	1.79173	1.66042e+06	1.58394e+06	921374	701776	3.45332e+06	2.18618e+06	3.10837e+06	2.51148e+06				Y			SKHKRQISMEDYKNL
C1_03710C	MSB1	A0A1D8PD52 [922-944]	A0A1D8PD52 1xPhospho [S937]	Msb1p	0.129164	0.62965	0.930592	1.43108	1.51627e+06	0	0	1.65828e+06	1.91313e+06	976970	2.09692e+06	2.37461e+06		Y					SSATDLESPVRVNDK
C1_03710C	MSB1	A0A1D8PD52 [667-679]	A0A1D8PD52 1xPhospho [T/S]	Msb1p	0.175377	4.11204	-3.08659	0.850077	6.36623e+06	4.75425e+06	1.1399e+07	1.15893e+06	1.30908e+06	0	1.10603e+07	1.15766e+07
C1_03740W	WAR1	Q59VQ8 [246-263]	Q59VQ8 1xPhospho [S/T]	Transcriptional regulator WAR1 (Weak acid resistance protein 1)	0.617845	0.241688	0.788981	0.412824	3.81253e+06	4.04919e+06	5.5227e+06	6.54174e+06	6.91796e+06	6.66593e+06	8.31111e+06	7.75015e+06
C1_03740W	WAR1	Q59VQ8 [9-37]	Q59VQ8 1xPhospho [S]	Transcriptional regulator WAR1 (Weak acid resistance protein 1)	0	-21.467	21.467	0	0	0	0	0	1.18606e+06	1.71263e+06	0	0
C1_03740W	WAR1	Q59VQ8 [209-225]	Q59VQ8 1xPhospho [S213]	Transcriptional regulator WAR1 (Weak acid resistance protein 1)	-0.696145	-1.95699	1.78863	0.527783	1.2688e+07	8.03776e+06	1.21724e+06	1.15751e+07	3.94991e+07	3.21054e+07	1.16637e+07	6.77911e+06							ILRGNTTSPTSKDDE
C1_03740W	WAR1	Q59VQ8 [786-795]	Q59VQ8 1xPhospho [S786]	Transcriptional regulator WAR1 (Weak acid resistance protein 1)	0.252268	-1.51768	0.874753	-0.895194	5.2028e+06	4.45561e+06	4.3996e+06	7.10433e+06	7.01448e+06	1.06961e+07	2.97197e+06	3.2134e+06							VAGSLRKSFSENDQA
C1_03740W	WAR1	Q59VQ8 [246-263]	Q59VQ8 2xPhospho [T253; S257]	Transcriptional regulator WAR1 (Weak acid resistance protein 1)	-20.7789	-20.0927	-0.686186	0	0	1.79913e+06	0	0	616894	501254	0	0							GFSNDSPTDLQSPPF	DSPTDLQSPPFVSKF
C1_03760C	STR2	A0A1D8PD47 [199-206]	A0A1D8PD47 1xPhospho [S201]	Cystathionine gamma-synthase	-0.436898	-1.86546	2.27825	0.84969	603206	512047	441087	382774	2.50913e+06	2.90086e+06	667299	817393						Y	QIQSRSPSISASRAS
C1_03770W	SKO1	Q59VR1 [99-112]	Q59VR1 1xPhospho [S105]	Transcriptional regulator SKO1	-0.654571	0	-9.17192	-8.51735	261.017	314.78	0	365.419	0	0	0	0							RLPPIGLSPGGTTSR
C1_03770W	SKO1	Q59VR1 [98-112]	Q59VR1 1xPhospho [S105]	Transcriptional regulator SKO1	-0.282436	0.039575	-1.05254	-0.730529	51676.1	85107.6	46715.6	65747.9	37043.9	28901.5	37781.3	29998.2							RLPPIGLSPGGTTSR
C1_03770W	SKO1	Q59VR1 [182-192]	Q59VR1 1xPhospho [T185]	Transcriptional regulator SKO1	0.926651	-0.0885451	-0.634676	-1.64987	4634.94	9327.58	6542.9	19998.8	6597.11	2395.59	5024.17	3433.14			Y				GMRKTGLTPNESNIR
C1_03780C	HMG1	A0A1D8PD39 [574-593]	A0A1D8PD39 1xPhospho [S]	3-hydroxy-3-methylglutaryl coenzyme A reductase (HMG-CoA reductase) (EC 1.1.1.34)	0.333822	0.633979	-0.637497	-0.337339	22530.1	31043.4	30472.9	37048.6	18042	16396.1	26450.2	26992.9
C1_03780C	HMG1	A0A1D8PD39 [574-593]	A0A1D8PD39 2xPhospho [S585; S586]	3-hydroxy-3-methylglutaryl coenzyme A reductase (HMG-CoA reductase) (EC 1.1.1.34)	0.348278	0.320187	0.280336	0.252246	24342.4	31620.9	39544.4	31699.4	38030.5	29935.9	54937.7	29918.1							IPDNEDESSDEELEI	PDNEDESSDEELEIK
C1_03790C	FPR3	Q59VR3 [240-245]	Q59VR3 1xPhospho [S243]	FK506-binding protein 3 (EC 5.2.1.8) (Peptidyl-prolyl cis-trans isomerase) (PPIase) (Rotamase)	0.867133	-4.52113	1.2843	-4.10396	8.4272	0	7.25135	8.94419	21.9613	0	0	0							EKEKVKESPKESKKR
C1_03790C	FPR3	Q59VR3 [276-289]	Q59VR3 1xPhospho [S284]	FK506-binding protein 3 (EC 5.2.1.8) (Peptidyl-prolyl cis-trans isomerase) (PPIase) (Rotamase)	0	-7.81942	7.81942	0	0	0	0	0	150.145	74.7351	0	0							LEQGPTGSTLVEKDN
C1_03820W	PDR16	A0A1D8PD50 [9-36]	A0A1D8PD50 1xPhospho [S/T]	Phosphatidylinositol transporter	-0.771155	-0.391949	0.276083	0.655289	23216.8	22432.1	16085.5	10662	25025.6	30251	27583.4	14542.7
C1_03820W	PDR16	A0A1D8PD50 [9-36]	A0A1D8PD50 2xPhospho [T/S]	Phosphatidylinositol transporter	-0.0442392	0.248936	0.915156	1.20833	6317.3	7340.55	8401.75	4843.61	12137.4	13619.1	17690	12917.4
C1_03820W	PDR16	A0A1D8PD50 [9-36]	A0A1D8PD50 3xPhospho [S10; S21; S24]	Phosphatidylinositol transporter	-11.3342	-1.10711	-0.554445	9.67262	816.046	1764.78	0	0	1270.2	486.815	538.593	276.52							AKLRNKVSTPPPPVA	PPVATTGSPTSSSSE	ATTGSPTSSSSEITT
C1_03860C	BNI4	A0A1D8PD43 [548-562]	A0A1D8PD43 1xPhospho [S/T]	Bni4p	-8.83293	1.79299	1.42598	12.0519	455.012	0	0	0	547.208	677.084	540.72	3704.3
C1_03860C	BNI4	A0A1D8PD43 [639-653]	A0A1D8PD43 1xPhospho [S/T]	Bni4p	2.1766	-0.125874	0.511317	-1.79116	5060.56	4653.62	10521.5	33398.6	9227.34	4619.2	6190.31	6499.25
C1_03860C	BNI4	A0A1D8PD43 [1486-1511]	A0A1D8PD43 1xPhospho [S]	Bni4p	-0.152794	-1.80221	0.623546	-1.02588	5474.46	9209.43	3708.94	9499.22	12632.4	9991	2413.41	4072.78
C1_03860C	BNI4	A0A1D8PD43 [1518-1534]	A0A1D8PD43 1xPhospho [S]	Bni4p	0.610546	2.54854	0.105771	2.04376	3613.45	4123.26	4395.16	7418.07	5424.05	2901.27	41734.9	6976.47
C1_03860C	BNI4	A0A1D8PD43 [1549-1565]	A0A1D8PD43 1xPhospho [S]	Bni4p	1.08974	-4.36026	2.61598	-2.83402	1432.76	0	2070.01	980.566	6714.42	2074.1	266.903	160.052
C1_03860C	BNI4	A0A1D8PD43 [1518-1542]	A0A1D8PD43 1xPhospho [S]	Bni4p	1.24751	0.265573	0.101265	-0.88067	3892.17	4907.5	8595.3	12299.2	4639.56	4800.04	5536.59	5811.08
C1_03860C	BNI4	A0A1D8PD43 [533-541]	A0A1D8PD43 1xPhospho [S]	Bni4p	2.17579	0.165865	1.29554	-0.714384	657.6	583.879	2554.65	3058.28	1272.59	1776.32	1692.9	1727.6
C1_03860C	BNI4	A0A1D8PD43 [826-847]	A0A1D8PD43 1xPhospho [S]	Bni4p	2.60545	7.50105	-7.67045	-2.77486	202.722	0	737.327	501.485	0	0	100.928	79.2223
C1_03860C	BNI4	A0A1D8PD43 [895-902]	A0A1D8PD43 1xPhospho [S]	Bni4p	10.3106	-10.1859	10.1859	-10.3106	0	0	0	1268.99	590.996	572.827	0	0
C1_03860C	BNI4	A0A1D8PD43 [1055-1062]	A0A1D8PD43 1xPhospho [S1055]	Bni4p	1.64454	-0.170508	-2.06779	-3.88283	434.837	913.68	815.788	3402.44	320.894	0	163.474	121.539			Y				KNSTSRKSNLNEELK
C1_03860C	BNI4	A0A1D8PD43 [1260-1269]	A0A1D8PD43 1xPhospho [S1264]	Bni4p	1.16068	-0.453466	-0.117672	-1.73182	2889.49	4960.05	6377.19	11172.8	3415.24	3819.4	2585.67	2697.42							DSKTPTSSPLSMKHD
C1_03860C	BNI4	A0A1D8PD43 [1423-1442]	A0A1D8PD43 1xPhospho [S1435]	Bni4p	11.1054	0.636791	8.59785	-1.87079	0	0	461.738	1740.52	386.445	0	238.293	363.132			Y				GSAHTNNSNSTANDK
C1_03860C	BNI4	A0A1D8PD43 [438-449]	A0A1D8PD43 1xPhospho [S440]	Bni4p	1.26098	0.415326	-0.955384	-1.80103	4031.47	4194.91	7151.97	12564.6	1832.6	2409.29	2383.12	3274.21				Y			HHHNKSNSYNNNYNI
C1_03860C	BNI4	A0A1D8PD43 [45-51]	A0A1D8PD43 1xPhospho [S45]	Bni4p	0.740727	-1.88498	-0.397964	-3.02367	1137.8	647.239	740.96	2242.55	763.869	590.611	244.302	121.692			Y				KHSMSSRSLNEFTKD
C1_03860C	BNI4	A0A1D8PD43 [508-526]	A0A1D8PD43 1xPhospho [S523]	Bni4p	2.03191	1.88201	-2.2154	-2.36531	5605.73	0	11507.5	11420	1206.27	0	2332.53	2116.33		Y	Y				NDSVSLGSPHKRPSQ
C1_03860C	BNI4	A0A1D8PD43 [547-562]	A0A1D8PD43 1xPhospho [S549]	Bni4p	0	0.278844	10.6254	10.9042	0	0	0	0	376.926	1201.71	1414.09	501.36	Y						GKFNRKNSNTTTSTD
C1_03860C	BNI4	A0A1D8PD43 [581-598]	A0A1D8PD43 1xPhospho [S597]	Bni4p	0.565717	-0.0149334	-0.595866	-1.17652	1911.53	2470.74	1847.74	4639.03	1459.23	1439.94	1978.99	890.318							PSTASTNSKSSNGKK
C1_03860C	BNI4	A0A1D8PD43 [618-633]	A0A1D8PD43 1xPhospho [S620]	Bni4p	1.05757	0.425422	-1.15851	-1.79066	1041.75	1246.77	1858.31	2906.17	1024.65	0	620.699	755.715							KSKSKSHSLNESNSS
C1_03860C	BNI4	A0A1D8PD43 [654-669]	A0A1D8PD43 1xPhospho [S654]	Bni4p	1.23827	-2.13269	0.885575	-2.48538	1770.15	431.282	2186.18	3008.71	2011.06	2056.94	759.66	167.205							MLSEQPKSIDDVEDT
C1_03860C	BNI4	A0A1D8PD43 [712-727]	A0A1D8PD43 1xPhospho [S716]	Bni4p	1.27031	-0.0223285	1.011	-0.281638	576.016	374.397	1124.32	1169.6	897.188	1019.2	1089.63	797.311							LKKGVSNSNPSLSSL
C1_03860C	BNI4	A0A1D8PD43 [712-747]	A0A1D8PD43 1xPhospho [S732]	Bni4p	8.20904	8.5067	0	0.297657	0	0	294.915	0	0	0	0	362.723							GNKPVVNSTNNNNLI
C1_03860C	BNI4	A0A1D8PD43 [765-791]	A0A1D8PD43 1xPhospho [S785]	Bni4p	0	-9.33564	9.33564	0	0	0	0	0	0	645.112	0	0							DDIEDEHSGEEDIKP
C1_03860C	BNI4	A0A1D8PD43 [765-794]	A0A1D8PD43 1xPhospho [S785]	Bni4p	0.214199	0.561155	-0.56382	-0.216864	1568.76	1451.74	1183.04	2321.08	1141.39	901.689	1431.47	1583.46							DDIEDEHSGEEDIKP
C1_03860C	BNI4	A0A1D8PD43 [801-825]	A0A1D8PD43 1xPhospho [S809]	Bni4p	-0.779781	-0.145879	-0.365395	0.268507	7256.9	16981	5712.95	8404.14	11552.3	7262.27	8679.13	8325.96							VGNIHNNSDDEEDDD
C1_03860C	BNI4	A0A1D8PD43 [801-820]	A0A1D8PD43 1xPhospho [S809]	Bni4p	2.88482	-1.02131	0.555021	-3.35111	809.179	1040.1	4878.61	8786.75	1553.66	1163.74	1091.36	246.91							VGNIHNNSDDEEDDD
C1_03860C	BNI4	A0A1D8PD43 [830-847]	A0A1D8PD43 1xPhospho [S836]	Bni4p	1.26948	-1.72957	1.53211	-1.46694	354.424	464.333	916.979	1058.25	1272.34	1097.47	450.579	263.319							RGQERGASDDDDDDD
C1_03860C	BNI4	A0A1D8PD43 [903-907]	A0A1D8PD43 1xPhospho [S903]	Bni4p	2.51007	6.94605	-9.78895	-5.35297	295.553	588.091	1575.97	3462.37	0	0	0	122.302			Y				NYQSSPKSIDLKREA
C1_03860C	BNI4	A0A1D8PD43 [908-927]	A0A1D8PD43 1xPhospho [S923]	Bni4p	1.46001	-1.02262	1.21976	-1.26287	2100.32	914.712	2824.41	5471.99	4945.58	2077.99	2029.1	1427.54							NDDDDNSSPLQRTIK
C1_03860C	BNI4	A0A1D8PD43 [909-927]	A0A1D8PD43 1xPhospho [S923]	Bni4p	4.14386	0	-7.83944	-11.9833	228.038	0	2030.67	2017.18	0	0	0	0							NDDDDNSSPLQRTIK
C1_03860C	BNI4	A0A1D8PD43 [569-577]	A0A1D8PD43 1xPhospho [T/S]	Bni4p	0.154095	-0.542993	-0.213077	-0.910165	4334.28	3480.88	3691.69	5004.53	3893.32	2848.64	2049.68	2577.32
C1_03860C	BNI4	A0A1D8PD43 [568-577]	A0A1D8PD43 1xPhospho [T/S]	Bni4p	1.18082	-0.0152748	0.900301	-0.295789	529.389	701.136	904.561	1886.37	1963.41	334.178	1222.27	1051.1
C1_03860C	BNI4	A0A1D8PD43 [1205-1220]	A0A1D8PD43 1xPhospho [T1210]	Bni4p	2.05995	1.94948	-0.249372	-0.359838	615.397	0	1437.54	1131.66	0	517.552	1163.59	838.237							GKIVDQSTPEPPVIV
C1_03860C	BNI4	A0A1D8PD43 [1260-1269]	A0A1D8PD43 2xPhospho [S1264; T/S]	Bni4p	0.665077	0.136595	-0.308278	-0.83676	998.714	3280.6	3548.53	3237.56	1901.02	1554.79	2141.37	1657.72							DSKTPTSSPLSMKHD
C1_03860C	BNI4	A0A1D8PD43 [1270-1281]	A0A1D8PD43 2xPhospho [S1277; T/S]	Bni4p	-0.0503824	-7.1432	-2.18342	-9.27624	386.369	254.716	140.367	478.682	0	140.357	0	0							HDDSPKTSVEEKDDD
C1_03860C	BNI4	A0A1D8PD43 [618-633]	A0A1D8PD43 2xPhospho [S626; S627]	Bni4p	0.179609	-9.49992	0.729223	-8.95031	0	435.76	0	493.665	561.502	161.536	0	0							HSLNESNSSISSEPK	SLNESNSSISSEPKK
C1_03860C	BNI4	A0A1D8PD43 [1254-1269]	A0A1D8PD43 2xPhospho [T1262; S1264]	Bni4p	1.98668	0	-8.87871	-10.8654	0	469.713	0	1864.55	0	0	0	0							SIDSKTPTSSPLSMK	DSKTPTSSPLSMKHD
C1_03860C	BNI4	A0A1D8PD43 [1254-1269]	A0A1D8PD43 3xPhospho [S1258; S1263; S1264]	Bni4p	3.21309	-8.3537	0.626149	-10.9406	210.945	0	735.672	1228.77	326.125	0	0	0			Y				SNKDSIDSKTPTSSP	IDSKTPTSSPLSMKH	DSKTPTSSPLSMKHD
C1_03870C	C1_03870C	A0A1D8PD58 [532-546]	A0A1D8PD58 1xPhospho [S]	GLOBIN domain-containing protein	1.33726	-10.7347	2.13209	-9.9399	228.955	158.778	605.966	375.25	1491.9	211.118	0	0
C1_03910C	C1_03910C	A0A1D8PD40 [565-585]	A0A1D8PD40 1xPhospho [S571]	Uncharacterized protein	-21.3672	-0.104679	-0.567742	20.6948	769445	1.93563e+06	0	0	1.82504e+06	0	0	1.69731e+06							RNEVGNNSDDNDDDE
C1_03910C	C1_03910C	A0A1D8PD40 [671-679]	A0A1D8PD40 1xPhospho [S673]	Uncharacterized protein	20.947	-21.5932	21.5932	-20.947	0	0	0	2.02157e+06	2.36563e+06	798095	0	0							ADSIKHLSPTSSIKR
C1_03910C	C1_03910C	A0A1D8PD40 [10-31]	A0A1D8PD40 1xPhospho [Y19]	Uncharacterized protein	0.899529	0.0310903	-0.252157	-1.1206	2378265	2.46423e+06	3.96802e+06	5.06545e+06	1.83446e+06	2.2315e+06	1.57533e+06	2.57919e+06							QDSSDQQYQQPQQQG
C1_03960C	C1_03960C	A0A1D8PD53 [127-140]	A0A1D8PD53 1xPhospho [S]	FHA domain-containing protein	-0.36181	3.13232	-0.713276	2.78085	5715.09	1825.5	3362.68	2505.1	2756.66	1842.21	14163.8	26168.8
C1_03960C	C1_03960C	A0A1D8PD53 [128-140]	A0A1D8PD53 1xPhospho [S]	FHA domain-containing protein	1.05294	-0.604712	1.35043	-0.307226	1664.59	1209.97	3028.78	2936.3	2875.9	4455.43	2818.92	2001.83
C1_03960C	C1_03960C	A0A1D8PD53 [636-644]	A0A1D8PD53 1xPhospho [S638]	FHA domain-containing protein	-0.106572	-5.09877	4.79616	-0.196032	0	75.718	0	70.2551	933.269	1197.23	36.7814	24.4205							QDLSRTPSVRDNMKN
C1_03960C	C1_03960C	A0A1D8PD53 [777-788]	A0A1D8PD53 1xPhospho [S785]	FHA domain-containing protein	1.12793	-2.95045	3.5961	-0.48228	142.288	61.692	287.655	159.318	1015.89	1461.94	160.258	159.422		Y					ENQSCNGSPIKKSIT
C1_03960C	C1_03960C	A0A1D8PD53 [777-789]	A0A1D8PD53 1xPhospho [S785]	FHA domain-containing protein	2.81769	-0.350032	4.79031	1.62258	21.6192	0	84.9318	73.5408	246.259	378.637	267.418	222.639		Y					ENQSCNGSPIKKSIT
C1_03960C	C1_03960C	A0A1D8PD53 [368-381]	A0A1D8PD53 1xPhospho [T/S]	FHA domain-containing protein	-0.175565	-1.33155	1.49428	0.338294	838.197	1014.55	692.054	948.292	2842.74	2378.7	1160.95	913.141
C1_03960C	C1_03960C	A0A1D8PD53 [777-789]	A0A1D8PD53 2xPhospho [S781; S785]	FHA domain-containing protein	-1.15538	-8.36474	3.64333	-3.56602	0	25.3806	10.8435	0	282.246	46.3914	0	0							FPKVENQSCNGSPIK	ENQSCNGSPIKKSIT
C1_03990W	C1_03990W	A0A1D8PD55 [74-95]	A0A1D8PD55 1xPhospho [S]	AN1-type domain-containing protein	0.56978	-1.09472	1.14866	-0.515838	1498.37	2230.8	2268.46	3267.2	2989.87	5279.18	1255.57	2615.7
C1_04130W	ERB1	Q59VP7 [376-386]	Q59VP7 1xPhospho [S380]	Ribosome biogenesis protein ERB1 (Eukaryotic ribosome biogenesis protein 1)	0.249669	0.600783	-1.64011	-1.289	447.682	1169.98	174.965	1748.51	344.206	174.11	493.056	293.507							KSKWLQESPIDRERN
C1_04130W	ERB1	Q59VP7 [575-610]	Q59VP7 1xPhospho [S581]	Ribosome biogenesis protein ERB1 (Eukaryotic ribosome biogenesis protein 1)	1.12859	-3.04076	1.16393	-3.00541	8320.03	278.325	10261.3	8539.71	8906.91	10360.5	1269.42	1071.04							KEEDNKESDNEDEDE
C1_04130W	ERB1	Q59VP7 [575-611]	Q59VP7 1xPhospho [S581]	Ribosome biogenesis protein ERB1 (Eukaryotic ribosome biogenesis protein 1)	1.89168	-2.01165	2.5514	-1.35193	1126.88	350.063	2098.03	3385.11	4346.45	4316.26	1190.87	956.634							KEEDNKESDNEDEDE
C1_04180W	HTB2	Q59VP1 [39-47]	Q59VP1 1xPhospho [S/T]	Histone H2B.2	-0.689806	-0.830811	0.0500499	-0.0909552	50.2451	29.459	23.5577	25.4738	28.5844	53.9686	35.6567	10.3179
C1_04180W	HTB2	Q59VP1 [113-120]	Q59VP1 1xPhospho [S116]	Histone H2B.2	-2.60738	-4.80717	2.19979	0	5.09397	0	0	0	5.10253	21.8939	0	0							ELAKHAVSEGTRAVT
C1_04290C	ACS2	Q8NJN3 [605-613]	Q8NJN3 1xPhospho [T605]	Acetyl-coenzyme A synthetase 2 (EC 6.2.1.1) (Acetate--CoA ligase 2) (Acyl-activating enzyme 2)	-5.4902	-0.336511	1.22875	6.38243	10.8473	33.1011	0	0	69.747	34.5955	73.4225	9.00394							LVLQVRKTIGPFAAP
C1_04300C	SSA2	P46587 [608-645]	P46587 1xPhospho [S/T]	Heat shock protein SSA2	-3.55444	-4.91133	1.35689	0	6.71962	4.02917	0	0	22.2435	6.84889	0	0
C1_04300C	SSA2	P46587 [530-537]	P46587 1xPhospho [S532]	Heat shock protein SSA2	-0.430073	-1.91566	1.22454	-0.261049	0.352215	0.262324	0.19835	0	1.83757	0.93529	0	0							EEDEKEASRVQAKNQ
C1_04300C	SSA2	P46587 [560-570]	P46587 1xPhospho [S563]	Heat shock protein SSA2	-2.45062	-3.08294	0.632321	0	4.46649	0	0	0	7.47337	0	0	0							FKSKLDASEIEEVTK
C1_04300C	SSA2	P46587 [261-267]	P46587 1xPhospho [T263]	Heat shock protein SSA2	-0.905434	-2.18365	2.2803	1.00208	0.538508	0.834212	0.266728	0	6.95412	3.57203	0.8952	0.641907							RALRRLRTACERAKR
C1_04300C	SSA2	P46587 [549-557]	P46587 1xPhospho [T550]	Heat shock protein SSA2	0.171932	0.124876	1.28019	1.23313	4.9277	5.34158	6.06237	5.63322	18.9641	7.4057	12.4951	16.3493							YAYSLKNTLGEEQFK
C1_04390C	NOP4	A0A1D8PD99 [279-292]	A0A1D8PD99 1xPhospho [S282]	mRNA-binding ribosome biosynthesis protein	-2.56079	-1.41429	-0.156128	0.990375	42067.7	78678.7	9774.25	10689.3	87083.5	21277.9	21271.4	19384.5							NSDKELDSFDEEMEE
C1_04390C	NOP4	A0A1D8PD99 [279-293]	A0A1D8PD99 1xPhospho [S282]	mRNA-binding ribosome biosynthesis protein	-2.18949	0.0341969	-1.33083	0.892853	4096.64	4831.83	1164.45	792.149	3548.81	0	2033.66	1600.3							NSDKELDSFDEEMEE
C1_04390C	NOP4	A0A1D8PD99 [279-292]	A0A1D8PD99 1xPhospho [S282]	mRNA-binding ribosome biosynthesis protein	-1.83423	-12.1925	-0.07141	-10.4296	2364.95	2552.09	658.485	719.731	3940.35	739.179	0	0							NSDKELDSFDEEMEE
C1_04400C	APE2	Q59KZ1 [637-645]	Q59KZ1 1xPhospho [S639]	Aminopeptidase 2 (EC 3.4.11.-)	-0.45998	-2.25826	2.59288	0.794601	0	32.9129	0	23.6546	138.845	64.752	0	41.7657							SGFIKTSSLLDLVKS
C1_04430C	C1_04430C	A0A1D8PDA0 [213-226]	A0A1D8PDA0 1xPhospho [S216]	Sepiapterin reductase family protein	0.995808	-1.44275	0.504647	-1.93391	12100.4	774.879	24625.4	1051.45	16044.6	2222.99	2460.58	4258.82							HENKQLASPEEPGTV
C1_04430C	C1_04430C	A0A1D8PDA0 [196-204]	A0A1D8PDA0 1xPhospho [T198]	Sepiapterin reductase family protein	1.20544	-1.5786	-0.65745	-3.44149	12577.7	413.688	28691.5	1268.87	6424.31	1811.85	843.673	1913.18							EKFGKNMTPEGLQRF
C1_04450C	FMA1	A0A1D8PDA4 [2-12]	A0A1D8PDA4 1xAcetyl [N-Term]; 1xPhospho [T8]	Fma1p	1.62422	-2.01169	2.06969	-1.56622	28.2343	0	38.4339	50.6884	0	121.725	29.4336	0			Y				MSHVSIVTGASRGIG
C1_04480C	TUS1	A0A1D8PDA9 [428-439]	A0A1D8PDA9 1xPhospho [S]	Rho family guanine nucleotide exchange factor	-0.710479	0.304697	-1.17631	-0.161134	1.45881e+07	9.33044e+06	6.36803e+06	8.24899e+06	5.2614e+06	5.32211e+06	7.81177e+06	5.26055e+06
C1_04480C	TUS1	A0A1D8PDA9 [148-157]	A0A1D8PDA9 1xPhospho [S150]	Rho family guanine nucleotide exchange factor	1.49729	-2.14256	1.83814	-1.8017	2.64019e+06	680935	6.18661e+06	3.18932e+06	5.31541e+06	6.55926e+06	596772	2.09258e+06							IEYVRHASINSTDYK
C1_04480C	TUS1	A0A1D8PDA9 [768-773]	A0A1D8PDA9 1xPhospho [T770]	Rho family guanine nucleotide exchange factor	0.391095	0.612833	-0.380179	-0.158441	6446900	8.31291e+06	7.81172e+06	1.15441e+07	7.65956e+06	3.68103e+06	8.44639e+06	8.8963e+06							FIDNRISTLPRVRDL
C1_04490W	C1_04490W	A0A1D8PDB1 [23-30]	A0A1D8PDB1 1xPhospho [S28]	SHNi-TPR domain-containing protein	0.771443	0.309416	1.07504	0.613016	84.8641	135.952	162.283	215.353	265.967	200.352	288.897	289.209							SKDFDLASEKYGEAC
C1_04610W	ATP1	A0A1D8PDC4 [41-53]	A0A1D8PDC4 1xPhospho [S]	ATP synthase subunit alpha	-0.901264	-1.28752	1.08764	0.701381	10.1155	7.86516	2.17914	6.98344	34.3054	5.03348	6.88511	8.63986
C1_04610W	ATP1	A0A1D8PDC4 [190-199]	A0A1D8PDC4 1xPhospho [S190]	ATP synthase subunit alpha	1.32446	-1.14705	3.21564	0.744134	0	0	1.50439	0	5.9374	2.35236	3.19478	0							PMQTGLKSVDALVPI
C1_04610W	ATP1	A0A1D8PDC4 [56-68]	A0A1D8PDC4 1xPhospho [S58]	ATP synthase subunit alpha	3.7238	-0.164604	3.21218	-0.676228	0	0	6.45684	5.75541	5.53618	2.73133	3.42107	3.84714							EDRIRGVSEEANLNE
C1_04610W	ATP1	A0A1D8PDC4 [69-78]	A0A1D8PDC4 1xPhospho [S71]	ATP synthase subunit alpha	-0.420869	-0.384617	-0.603042	-0.56679	24.6109	35.6148	21.4023	23.3318	26.1986	13.1102	17.001	12.8748							NETGRVLSVGDGIAR
C1_04620W	C1_04620W	A0A1D8PDC2 [20-42]	A0A1D8PDC2 1xPhospho [S/T]	Uncharacterized protein	0	1.1382	9.6704	10.8086	0	0	0	0	426.922	386.933	1120.4	672.153
C1_04620W	C1_04620W	A0A1D8PDC2 [152-176]	A0A1D8PDC2 1xPhospho [S/T]	Uncharacterized protein	4.1495	0.349383	3.03437	-0.765742	210.014	0	1960.49	1783.37	1095.89	631.921	0	2201.54
C1_04620W	C1_04620W	A0A1D8PDC2 [102-122]	A0A1D8PDC2 1xPhospho [S]	Uncharacterized protein	3.53066	1.6717	2.99269	1.13373	126.33	225.958	2349.72	1732.12	1338.96	1472.06	5541.76	3416.04
C1_04620W	C1_04620W	A0A1D8PDC2 [222-233]	A0A1D8PDC2 1xPhospho [S224]	Uncharacterized protein	3.96747	-0.992889	3.79555	-1.16481	102.966	0	1314.59	310.782	760.426	682.239	454.073	270.326							NLRPKAQSDVKPTDA
C1_04620W	C1_04620W	A0A1D8PDC2 [305-330]	A0A1D8PDC2 1xPhospho [T/S]	Uncharacterized protein	2.14721	0.583659	2.3502	0.786649	3320.43	4499.25	20396.2	14246.2	23823.9	16052.4	34377.5	25383.5
C1_04620W	C1_04620W	A0A1D8PDC2 [466-472]	A0A1D8PDC2 1xPhospho [T469]	Uncharacterized protein	2.63307	0.351461	3.25964	0.978029	100.26	126.976	786.369	628.481	1270.67	914.239	1505.35	1282.55		Y	Y				ETTRTKLTPSKKDIH
C1_04620W	C1_04620W	A0A1D8PDC2 [305-330]	A0A1D8PDC2 2xPhospho [S/T]	Uncharacterized protein	2.89169	0.784872	2.102	-0.00481591	2227.2	4240.21	25127.1	22876.4	16102.7	11665.4	30102.5	17741.1
C1_04620W	C1_04620W	A0A1D8PDC2 [102-122]	A0A1D8PDC2 2xPhospho [S109; S110]	Uncharacterized protein	0	-7.91728	7.91728	0	0	0	0	0	240.735	0	0	0							DMEGLEFSSDEDVAN	MEGLEFSSDEDVANG
C1_04620W	C1_04620W	A0A1D8PDC2 [20-42]	A0A1D8PDC2 2xPhospho [T/S]	Uncharacterized protein	-0.209956	0.529422	1.54097	2.28035	154.491	191.177	0	298.716	524.596	483.173	930.366	524.642
C1_04620W	C1_04620W	A0A1D8PDC2 [305-330]	A0A1D8PDC2 3xPhospho [S318; S327; S/T]	Uncharacterized protein	2.79806	1.33538	1.79426	0.331578	137.526	312.964	2273.97	865.166	735.339	829.6	2163.08	1787.44							NEESAVPSAPTPPAA	PTPPAAPSPTKETTS
C1_04630C	C1_04630C	A0A1D8PDD2 [46-61]	A0A1D8PDD2 1xPhospho [S]	Phospholipid-transporting ATPase (EC 7.6.2.1)	-0.115428	-0.971355	6.00028	5.14436	139394	194432	118939	189218	2.13213e+07	47805.7	195619	1.07032e+07
C1_04630C	C1_04630C	A0A1D8PDD2 [6-24]	A0A1D8PDD2 1xPhospho [S14]	Phospholipid-transporting ATPase (EC 7.6.2.1)	0.74713	-0.480727	6.33751	5.10966	161562	202274	325151	285530	2.93248e+07	98282	347200	2.07379e+07							YSFVGRDSFDDLDSS
C1_04630C	C1_04630C	A0A1D8PDD2 [89-102]	A0A1D8PDD2 2xPhospho [T95; S]	Phospholipid-transporting ATPase (EC 7.6.2.1)	-0.751391	-7.3215	7.46877	0.898662	8930.87	11105.5	7365.44	4536.38	3.53744e+06	12045.5	22189.9	0			Y				RSISSSSTSLNIAAR
C1_04630C	C1_04630C	A0A1D8PDD2 [89-102]	A0A1D8PDD2 3xPhospho [S94; S96; T/S]	Phospholipid-transporting ATPase (EC 7.6.2.1)	-12.5687	-2.35907	9.38987	19.5995	6073.99	0	0	0	4.05929e+06	16172.2	25793.7	768581			Y				NRSISSSSTSLNIAA	SISSSSTSLNIAARS
C1_04640W	C1_04640W	A0A1D8PDD7 [2-29]	A0A1D8PDD7 1xAcetyl [N-Term]; 1xPhospho [T]	Triacylglycerol lipase	-13.5292	-0.677721	1.49899	14.3504	3251.29	8569.43	0	0	14321.6	19090.9	5930.71	14956.8
C1_04680W	PIL1	A0A1D8PDD1 [12-29]	A0A1D8PDD1 1xPhospho [S/T]	Lipid-binding protein	0.790956	-0.497696	1.0122	-0.276454	643.33	923.327	1312.27	1399.12	2086.38	1074.55	1308.47	929.926
C1_04680W	PIL1	A0A1D8PDD1 [4-11]	A0A1D8PDD1 1xPhospho [S]	Lipid-binding protein	-0.202509	-2.2341	1.00008	-1.03151	497.993	397.089	369.191	408.538	1446.95	344.313	205.95	174.003
C1_04680W	PIL1	A0A1D8PDD1 [158-165]; Q59KV8 [158-165]	A0A1D8PDD1 1xPhospho [S163]; Q59KV8 1xPhospho [S163]	Lipid-binding protein	1.78723	-7.28717	-0.549717	-9.62411	122.43	105.203	416.34	371.787	87.955	67.2361							Y		LKYKDPQSPKIPVLE
C1_04680W	PIL1	A0A1D8PDD1 [58-63]	A0A1D8PDD1 1xPhospho [S59]	Lipid-binding protein	-0.882019	-1.46146	2.85544	2.276	16.9661	26.5654	8.52144	14.6417	232.964	88.3222	57.5063	58.5238	Y						PELSRKLSQFIKMEK
C1_04680W	PIL1	A0A1D8PDD1 [4-8]	A0A1D8PDD1 1xPhospho [S6]	Lipid-binding protein	0.410459	-1.94201	-1.31048	-3.66295	15.6451	48.4947	20.3919	65.1859	14.2401	11.0233	0	5.83518							XXMHRTYSLRSSKAP
C1_04680W	PIL1	A0A1D8PDD1 [85-103]	A0A1D8PDD1 1xPhospho [S98]	Lipid-binding protein	2.00683	0.668979	2.12572	0.78787	80.7466	80.9867	309.41	343.612	404.235	304.968	509.977	618.209							EDNEDDISDVTDKLG
C1_04680W	PIL1	A0A1D8PDD1 [4-11]	A0A1D8PDD1 2xPhospho [S6; S9]	Lipid-binding protein	1.88503	3.04901	1.99908	3.16305	4.04705	0	10.4058	7.23604	10.2205	8.95475	65.3785	100.601			Y				XXMHRTYSLRSSKAP	HRTYSLRSSKAPTAS
C1_04710C	RSA3	Q59VF9 [55-77]	Q59VF9 1xPhospho [S66]	Ribosome assembly protein 3	-1.03226	-1.64466	1.18266	0.570259	227471	325016	88598.6	181535	794443	459676	165620	235473							IDDIDIESDNENSAL
C1_04760C	SYG1	A0A1D8PDF2 [942-968]	A0A1D8PDF2 1xPhospho [S950]	Syg1p	0.51927	1.01023	0.268563	0.75952	5.8338e+06	4.4498e+06	1.02906e+07	4.44814e+06	6.93143e+06	5.45627e+06	1.38301e+07	1.11215e+07							ALQIEDDSDDDEDED
C1_04760C	SYG1	A0A1D8PDF2 [188-196]	A0A1D8PDF2 1xPhospho [T190]	Syg1p	0.596885	-3.78976	3.8571	-0.529543	112907	0	0	170767	891708	744458	0	118302							NHPVKSNTDHVVNKV
C1_04780C	C1_04780C	A0A1D8PDD9 [701-716]	A0A1D8PDD9 1xPhospho [S/T]	Protein kinase domain-containing protein	1.55557	0.0386388	0.323621	-1.19331	805.543	1194.84	2270.88	3611.18	1487.31	1016.36	994.801	1576.85
C1_04810W	TCO89	A0A1D8PDD8 [143-153]	A0A1D8PDD8 1xPhospho [S/T]	Tco89p	0.100593	0.389839	0.329835	0.619081	5.80457e+07	7.13415e+07	4.994e+07	8.87907e+07	1.07971e+08	5.46517e+07	9.10662e+07	1.2201e+08
C1_04810W	TCO89	A0A1D8PDD8 [363-382]	A0A1D8PDD8 1xPhospho [S/Y]	Tco89p	0.402161	0.409089	-0.716918	-0.70999	4341025	898940	1.98275e+06	4.94179e+06	2.07434e+06	1.11363e+06	1.7279e+06	2.50524e+06
C1_04810W	TCO89	A0A1D8PDD8 [64-72]	A0A1D8PDD8 1xPhospho [S]	Tco89p	0.867389	-1.16008	0.567299	-1.46017	2.93779e+07	1.19328e+07	3.13223e+07	4.40432e+07	3.66634e+07	2.45486e+07	1.23291e+07	1.50625e+07
C1_04810W	TCO89	A0A1D8PDD8 [10-26]	A0A1D8PDD8 1xPhospho [S19]	Tco89p	1.98171	1.3457	-0.192101	-0.828118	0	680007	1.10191e+06	1.58386e+06	0	595231	617911	894888							SNDSRPQSTENDTAR
C1_04810W	TCO89	A0A1D8PDD8 [270-282]	A0A1D8PDD8 1xPhospho [S280]	Tco89p	0.597568	0.352026	-1.27852	-1.52406	2.88148e+06	0	567828	3.79232e+06	1.1878e+06	0	719664	796383							SHPELGSSTKSSTDD
C1_04810W	TCO89	A0A1D8PDD8 [111-117]	A0A1D8PDD8 1xPhospho [T/S]	Tco89p	-0.681783	-1.04192	0.452348	0.0922154	1.88566e+07	2.54433e+07	1.12857e+07	1.63307e+07	3.63107e+07	2.43033e+07	1.85407e+07	1.08984e+07
C1_04810W	TCO89	A0A1D8PDD8 [127-133]	A0A1D8PDD8 1xPhospho [T132]	Tco89p	-0.390628	-20.5187	0.803852	-19.3242	600403	260124	295272	361136	1.1808e+06	321468	0	0						Y	KRNSRSLTKMTALQP
C1_04810W	TCO89	A0A1D8PDD8 [109-117]	A0A1D8PDD8 2xPhospho [S111; T112]	Tco89p	19.6361	-21.3151	21.3151	-19.6361	0	0	0	814830	1.87244e+06	736592	0	0			Y			Y	PHLNRSKSTEVLLKS	HLNRSKSTEVLLKSR
C1_04810W	TCO89	A0A1D8PDD8 [10-26]	A0A1D8PDD8 2xPhospho [S15; T/S]	Tco89p	0	-20.6983	20.6983	0	0	0	0	0	955719	745643	0	0			Y				KKEYSNDSRPQSTEN
C1_04810W	TCO89	A0A1D8PDD8 [64-73]	A0A1D8PDD8 2xPhospho [S69; S/T]	Tco89p	1.35976	-21.8811	1.67197	-21.5689	619741	592381	1.73336e+06	1.37747e+06	2.35674e+06	1.50568e+06	0	0			Y				PRNTSTPSLNKKQAN
C1_04830W	SEC21	A0A1D8PDE3 [577-584]	A0A1D8PDE3 1xPhospho [S583]	Coatomer subunit gamma	-1.49371	0.0971476	1.67074	3.2616	206.319	0	72.6187	0	547.785	111.273	316.421	388.615							KNLIVSDSKYDLNAL
C1_04830W	SEC21	A0A1D8PDE3 [655-668]	A0A1D8PDE3 1xPhospho [S657]	Coatomer subunit gamma	8.58986	1.40629	7.78354	0.599966	0	0	384.306	0	168.397	50.935	246.058	336.942							KGGTKVESAGDNVAN
C1_04830W	SEC21	A0A1D8PDE3 [691-701]	A0A1D8PDE3 1xPhospho [S693]	Coatomer subunit gamma	-4.0874	-0.419943	-2.28869	1.37877	474.939	3383.89	226.058	0	509.85	279.106	296.126	293.33							GKLTKSTSVPIYLTD
C1_04830W	SEC21	A0A1D8PDE3 [633-650]	A0A1D8PDE3 1xPhospho [T/S]	Coatomer subunit gamma	-1.87424	-0.546548	1.22938	2.55708	217.5	2374.47	0	706.287	4285.4	1793.27	1857.43	2304.05
C1_04890W	YBN5	A0A1D8PDE8 [64-70]	A0A1D8PDE8 1xPhospho [S68]	Obg-like ATPase 1	0.505237	-0.66821	-0.11862	-1.29207	20.9202	20.3298	25.5386	33.4292	15.2466	22.6686	14.3582	9.13057							EARVIVPSPRFDKLC
C1_04970W	CLU1	Q59MA9 [1327-1347]	Q59MA9 1xPhospho [S/T]	Clustered mitochondria protein homolog (Protein TIF31 homolog)	-0.259058	0.0216086	2.83496	3.11563	15.9471	17.8301	12.6347	15.4263	148.458	98.6853	121.04	129.848
C1_05030C	PSF2	Q59MA3 [177-203]	Q59MA3 1xPhospho [S198]	DNA replication complex GINS protein PSF2	6.23481	0.338466	-0.776794	-6.67314	0	17938.2	0	1.35104e+06	4663.54	5805.88	13237.9	0							DQDMEDASDDEDVXX
C1_05090W	TRY2	Q59LX5 [150-165]	Q59LX5 1xPhospho [S]	Transcriptional regulator of yeast form adherence 2	0.0370344	-2.65251	2.41017	-0.279373	1087.76	893.591	1007.81	1025.09	6791.01	3744.92	645.475	1029.36
C1_05090W	TRY2	Q59LX5 [88-111]	Q59LX5 1xPhospho [S101]	Transcriptional regulator of yeast form adherence 2	0.653667	1.67353	-0.132441	0.887423	2122.74	1280.09	2027.46	3326.31	2128.02	976.249	4023	5881.64							TVSQIDDSPHSNSGE
C1_05090W	TRY2	Q59LX5 [88-111]	Q59LX5 2xPhospho [S101; S/T]	Transcriptional regulator of yeast form adherence 2	0.503143	0.770529	0.548922	0.816308	1312.95	0	0	1861.26	1101.15	820.151	1650.84	1627.41							TVSQIDDSPHSNSGE
C1_05110C	ARO4	P79023 [2-14]	P79023 1xAcetyl [N-Term]; 1xPhospho [T4]	Phospho-2-dehydro-3-deoxyheptonate aldolase, tyrosine-inhibited (EC 2.5.1.54) (3-deoxy-D-arabino-heptulosonate 7-phosphate synthase) (DAHP synthase) (Phospho-2-keto-3-deoxyheptonate aldolase)	-0.352725	-0.791599	0.548042	0.109169	2205.05	1750.78	1354.36	1743.25	3947.33	1836.95	1751.85	1589.33							XXXXMSKTPVPTEYD
C1_05110C	ARO4	P79023 [2-14]	P79023 1xAcetyl [N-Term]; 2xPhospho [S2; T4]	Phospho-2-dehydro-3-deoxyheptonate aldolase, tyrosine-inhibited (EC 2.5.1.54) (3-deoxy-D-arabino-heptulosonate 7-phosphate synthase) (DAHP synthase) (Phospho-2-keto-3-deoxyheptonate aldolase)	-0.208741	-2.81018	3.24862	0.64718	37.2428	0	0	32.0912	257.847	104.635	50.8243	0							XXXXXXMSKTPVPTE	XXXXMSKTPVPTEYD
C1_05110C	ARO4	P79023 [4-14]	P79023 1xPhospho [T4]	Phospho-2-dehydro-3-deoxyheptonate aldolase, tyrosine-inhibited (EC 2.5.1.54) (3-deoxy-D-arabino-heptulosonate 7-phosphate synthase) (DAHP synthase) (Phospho-2-keto-3-deoxyheptonate aldolase)	0.0970216	-1.01867	0.150017	-0.965678	13189.6	10364.3	9424.04	15768.4	16010	10125.1	5494.91	7404.05							XXXXMSKTPVPTEYD
C1_05110C	ARO4	P79023 [2-14]	P79023 2xPhospho [S2; T4]	Phospho-2-dehydro-3-deoxyheptonate aldolase, tyrosine-inhibited (EC 2.5.1.54) (3-deoxy-D-arabino-heptulosonate 7-phosphate synthase) (DAHP synthase) (Phospho-2-keto-3-deoxyheptonate aldolase)	-0.240855	-0.60357	0.511359	0.148644	198.578	272.986	155.606	243.299	353.036	319.553	192.034	250.271							XXXXXXMSKTPVPTE	XXXXMSKTPVPTEYD
C1_05110C	ARO4	P79023 [4-14]	P79023 2xPhospho [T8; Y10]	Phospho-2-dehydro-3-deoxyheptonate aldolase, tyrosine-inhibited (EC 2.5.1.54) (3-deoxy-D-arabino-heptulosonate 7-phosphate synthase) (DAHP synthase) (Phospho-2-keto-3-deoxyheptonate aldolase)	-0.128034	-5.55142	0.498572	-4.92481	17.1346	15.0593	17.0311	12.3439	0	45.8968	0	0							MSKTPVPTEYDDTRI	KTPVPTEYDDTRILG
C1_05140W	BRG1	Q59LY1 [68-83]	Q59LY1 1xPhospho [S/T]	Biofilm regulator 1	-1.55699	-1.36245	-1.4566	-1.26205	546227	0	85509	100130	128817	70200	46731.7	30669.8
C1_05140W	BRG1	Q59LY1 [117-125]	Q59LY1 1xPhospho [S119]	Biofilm regulator 1	-6.88221	-1.77153	-6.7217	-1.61102	1.67097e+07	1.90402e+07	130510	172546	223829	114890	77181	22028.4							NSLPRLSSPTLPVKV
C1_05140W	BRG1	Q59LY1 [68-83]	Q59LY1 2xPhospho [T74; T/S]	Biofilm regulator 1	-7.0875	-4.61666	-4.08582	-1.61498	0	8.17577e+06	12638.3	47475.2	358992	122483	14393.9	5230.67							KNTSGSSTPTSSSTP
C1_05170C	CUE5	A0A1D8PDI5 [91-96]	A0A1D8PDI5 1xPhospho [S]	Ubiquitin-binding protein	-1.26638	-4.45477	-0.466624	-3.65501	486.087	632.105	112.87	351.381	426.749	382.162	0	35.9333
C1_05170C	CUE5	A0A1D8PDI5 [248-266]	A0A1D8PDI5 1xPhospho [S258]	Ubiquitin-binding protein	-0.39072	-0.154662	1.41375	1.64981	2670.92	3519.39	1452.27	3269.14	12229.2	4265.17	7365.91	7451.6							DDDELDDSPDEFEQI
C1_05170C	CUE5	A0A1D8PDI5 [249-266]	A0A1D8PDI5 1xPhospho [S258]	Ubiquitin-binding protein	1.10824	1.10972	0.663834	0.665313	4821.77	10940.1	15890.5	18090.4	14036.1	10935.8	28145.3	25746.1							DDDELDDSPDEFEQI
C1_05170C	CUE5	A0A1D8PDI5 [26-44]	A0A1D8PDI5 1xPhospho [S36]	Ubiquitin-binding protein	-3.68735	-7.83906	4.15171	0	11.8826	0	0	0	197.699	30.2785	0	0							VSTDDKESTTTSEDN
C1_05170C	CUE5	A0A1D8PDI5 [97-124]	A0A1D8PDI5 1xPhospho [T/S]	Ubiquitin-binding protein	-0.944551	0.0495468	0.785506	1.7796	2040.3	1763.53	849.475	1126.48	4594.55	1962.83	4469.74	2316.78
C1_05170C	CUE5	A0A1D8PDI5 [362-374]	A0A1D8PDI5 1xPhospho [T/S]	Ubiquitin-binding protein	-0.711055	-2.84284	1.78575	-0.346033	1203.22	2200.11	282.287	1796.33	7408.84	4328.22	839.271	795.853
C1_05170C	CUE5	A0A1D8PDI5 [57-74]	A0A1D8PDI5 1xPhospho [T/S]	Ubiquitin-binding protein	0.735715	-0.820144	0.69821	-0.857648	81.0807	0	68.8406	66.842	132.175	0	74.4285	0
C1_05170C	CUE5	A0A1D8PDI5 [202-212]	A0A1D8PDI5 1xPhospho [T204]	Ubiquitin-binding protein	-1.32742	-0.784269	-1.39134	-0.848187	483.647	707.98	149.802	324.437	365.311	88.3318	100.947	162.04							GRNQKELTDDELLAR
C1_05240C	RPT1	Q5A2A0 [10-21]	Q5A2A0 1xPhospho [T/S]	Proteasome regulatory particle base subunit	-0.0121702	-2.54413	0.444608	-2.08735	415.346	498.859	423.48	483.036	727.011	517.532	123.657	88.8932
C1_05240C	RPT1	Q5A2A0 [168-180]	Q5A2A0 2xPhospho [S171; T173]	Proteasome regulatory particle base subunit	-5.6147	-0.534452	2.82278	7.90303	47.9998	0	0	0	173.504	172.182	0	238.359							LPPRIDPSVTMMTVE	PRIDPSVTMMTVEEK
C1_05290W	GRS1	Q5A2A5 [2-12]	Q5A2A5 1xAcetyl [N-Term]; 1xPhospho [S4]	Glycine--tRNA ligase	0.950819	-2.14834	1.79781	-1.30134	27.1016	0	22.7497	30.5699	63.0761	33.6312	21.0401	0							XXXXMSASRTNIPFS
C1_05360C	C1_05360C	Q5A2B2 [531-539]	Q5A2B2 1xPhospho [T534]	Non-canonical poly(A) polymerase	-4.51984	-2.41759	-2.521	-0.418749	5235.88	186562	3073.88	5285.71	24458.6	8955.81	3204.22	3049.12	Y						VPEKKRTTPVTNKAK
C1_05360C	C1_05360C	Q5A2B2 [532-539]	Q5A2B2 1xPhospho [T534]	Non-canonical poly(A) polymerase	0	-15.0109	15.0109	0	0	0	0	0	33016.4	0	0	0	Y						VPEKKRTTPVTNKAK
C1_05370C	C1_05370C	A0A1D8PDJ5 [579-588]	A0A1D8PDJ5 1xPhospho [S585]	Protein kinase	-18.9543	-3.58031	3.74685	19.1209	507955	0	0	0	3.35234e+06	3.46696e+06	0	570109							KDDSDLHSFNKDRVP
C1_05380C	C1_05380C	A0A1D8PDJ8 [1347-1355]	A0A1D8PDJ8 1xPhospho [S1353]	DNA-binding protein	0.392949	-0.396471	-1.13723	-1.92665	2.99068e+06	1.96712e+06	2.72597e+06	3.78399e+06	0	2.25397e+06	701644	1.01073e+06							RSAIETVSPKQEFIV
C1_05380C	C1_05380C	A0A1D8PDJ8 [1535-1547]	A0A1D8PDJ8 1xPhospho [S1543]	DNA-binding protein	0.0569649	0.407481	-0.12908	0.221436	4413104	5.48594e+06	4.98973e+06	5.308e+06	4.62269e+06	4.42915e+06	6.42418e+06	5.58188e+06							LDIECTTSPDLKNSD
C1_05380C	C1_05380C	A0A1D8PDJ8 [199-207]	A0A1D8PDJ8 1xPhospho [S204]	DNA-binding protein	21.8646	-21.8967	21.8967	-21.8646	0	0	2.62714e+06	1.19136e+06	1.41803e+06	2.48639e+06	0	0		Y					TKNTLSSSPIKTKKS
C1_05380C	C1_05380C	A0A1D8PDJ8 [348-354]	A0A1D8PDJ8 1xPhospho [S351]	DNA-binding protein	0	-21.7882	21.7882	0	0	0	0	0	2.29521e+06	1.32647e+06	0	0		Y	Y				RKNRSTPSPLKNNSP
C1_05380C	C1_05380C	A0A1D8PDJ8 [791-801]	A0A1D8PDJ8 1xPhospho [S792]	DNA-binding protein	0	20.5951	0	20.5951	0	0	0	0	0	0	795355	788647							DASNARMSQLGFAVL
C1_05380C	C1_05380C	A0A1D8PDJ8 [346-354]	A0A1D8PDJ8 2xPhospho [S351; T/S]	DNA-binding protein	-18.9129	-22.3973	3.48436	0	493586	0	0	0	2.65715e+06	2.86696e+06	0	0		Y	Y				RKNRSTPSPLKNNSP
C1_05390C	C1_05390C	A0A1D8PDK0 [622-635]	A0A1D8PDK0 1xPhospho [S631]	Uncharacterized protein	8.48831	-0.566582	7.79462	-1.26027	150.779	0	50244.5	4260.8	0	33698.6	11332.4	11421.1							TESVDDDSPEEKKIR
C1_05390C	C1_05390C	A0A1D8PDK0 [639-654]	A0A1D8PDK0 1xPhospho [S645]	Uncharacterized protein	8.59294	-1.92861	9.00405	-1.51749	108.181	0	34018.7	8138.31	42506.8	13550.3	14724.5	0							RLDEQINSENSDDVS
C1_05390C	C1_05390C	A0A1D8PDK0 [655-684]	A0A1D8PDK0 1xPhospho [S671]	Uncharacterized protein	-7.81504	0.641146	6.9381	15.3943	224.197	0	0	0	0	27613.5	17996	25069.7			Y				ANDASADSDGENHDA
C1_05430W	SPT20	Q5A2B9 [475-487]	Q5A2B9 1xPhospho [S]	Transcription factor SPT20	-1.55243	-1.88501	1.53438	1.2018	746046	120358	149233	146154	1.12978e+06	1.37988e+06	370523	308947
C1_05430W	SPT20	Q5A2B9 [383-411]	Q5A2B9 1xPhospho [S394]	Transcription factor SPT20	0	-0.884938	16.4539	15.5689	0	0	0	0	35888.9	53876.4	16722.5	31885.9							SANQASASPTSVHPP
C1_05430W	SPT20	Q5A2B9 [729-737]	Q5A2B9 1xPhospho [S733]	Transcription factor SPT20	-0.575168	-1.37432	0.957801	0.158644	815434	143491	277170	366468	780610	1.08196e+06	374745	343708							QSKPVTTSPEVKKKR
C1_05430W	SPT20	Q5A2B9 [729-738]	Q5A2B9 1xPhospho [S733]	Transcription factor SPT20	-0.281003	-0.285158	0.643006	0.638851	83394.4	37001.3	33488.4	65599.3	87295	100713	68828.3	85460.7							QSKPVTTSPEVKKKR
C1_05460W	KOG1	Q5A2C3 [2-13]	Q5A2C3 1xAcetyl [N-Term]; 1xPhospho [S4]	Ubiquitin-binding TORC1 subunit	0.305132	-0.70008	0.543489	-0.461723	623766	465192	493998	851444	649411	937737	976950	0							XXXXMSSSQELYTSL
C1_05460W	KOG1	Q5A2C3 [945-958]	Q5A2C3 1xPhospho [S]	Ubiquitin-binding TORC1 subunit	0.868151	0.0761984	1.13592	0.343969	6.1427e+06	1.37906e+07	1.84658e+07	1.79188e+07	2.36145e+07	2.01906e+07	2.1539e+07	2.46419e+07
C1_05460W	KOG1	Q5A2C3 [928-941]	Q5A2C3 1xPhospho [S930]	Ubiquitin-binding TORC1 subunit	-0.290748	-21.7123	1.40051	-20.0211	729249	572308	596108	467886	1.66291e+06	1.77314e+06	0	0						Y	SLTTRSASANNITSN
C1_05460W	KOG1	Q5A2C3 [945-958]	Q5A2C3 2xPhospho [S950; T/S]	Ubiquitin-binding TORC1 subunit	0.553029	0.267751	1.11676	0.831484	4.29352e+06	5.18263e+06	8.60554e+06	5.29751e+06	1.04376e+07	1.01123e+07	1.28388e+07	1.19019e+07							IKGNMDDSDAESITS
C1_05470W	MTM1	A0A1D8PDJ9 [197-205]	A0A1D8PDJ9 1xPhospho [T202]	Mtm1p	-2.43086	1.09398	-1.04216	2.48268	742376	3.19489e+06	252363	477821	1.71674e+06	195191	2.45407e+06	1.62718e+06							VKKDGVRTMFKGLGI
C1_05490C	C1_05490C	Q5A2C6 [75-84]	Q5A2C6 1xPhospho [S78]	MICOS complex subunit	-6.99532	-2.48612	3.24779	7.75698	466659	0	0	3656.64	3.37437e+06	1.05846e+06	0	791197			Y				ISVRSTQSTENLFKS
C1_05510C	RPS27A	A0A1D8PDP4 [59-70]	A0A1D8PDP4 1xPhospho [S65]	40S ribosomal protein S27	0.344009	-2.4237	3.69846	0.930754	0	846.235	0	1074.38	4598.81	6399.14	2048.96	0							KCSTLLSSPTGGKAK
C1_05660C	C1_05660C	A0A1D8PDK7 [22-28]	A0A1D8PDK7 1xPhospho [S24]	Uncharacterized protein	-0.164858	-0.548296	0.43011	0.0466722	1640.55	2292.78	1416.16	2092.33	2603.93	2695.94	1689.34	1934.54							SSSSKYISPTLKLQD
C1_05720W	C1_05720W	A0A1D8PDL6 [2-12]	A0A1D8PDL6 1xAcetyl [N-Term]; 1xPhospho [T4]	Ribosomal 60S subunit protein L7A	0	-1.7472	4.63637	2.88917	0	0	0	0	13.8068	10.0639	0	6.40846							XXXXMATTLKPETLQ
C1_05720W	C1_05720W	A0A1D8PDL6 [69-80]	A0A1D8PDL6 1xPhospho [S]	Ribosomal 60S subunit protein L7A	-0.596679	-1.31569	-0.0341949	-0.753204	41.4651	42.8177	26.7014	28.6939	42.0018	40.2834	18.1108	14.3477
C1_05720W	C1_05720W	A0A1D8PDL6 [120-126]	A0A1D8PDL6 1xPhospho [S122]	Ribosomal 60S subunit protein L7A	-5.0073	-2.09535	0.101764	3.01371	18.8186	12.3437	0	0	16.7637	16.7492	3.10635	3.97003							VRLTKATSELIKLAE
C1_05750C	C1_05750C	A0A1D8PDM2 [410-425]	A0A1D8PDM2 1xPhospho [S415]	Uncharacterized protein	0	-20.9904	20.9904	0	0	0	0	0	752268	1.33093e+06	0	0							EKVDISISPQTQLDS
C1_05850W	POL32	A0A1D8PDM8 [266-283]	A0A1D8PDM8 1xPhospho [S275]	DNA polymerase delta subunit	-0.50594	-0.68353	0.887541	0.70995	3.40558e+06	1.77601e+06	2.03648e+06	1.6124e+06	4.35814e+06	5.22791e+06	2.55083e+06	3.41782e+06							DGDDFTFSDDDESPE
C1_05850W	POL32	A0A1D8PDM8 [266-283]	A0A1D8PDM8 1xPhospho [S275]	DNA polymerase delta subunit	-0.442932	0.181121	0.171293	0.795347	2.72478e+07	2.46912e+07	1.99066e+07	1.83017e+07	2.96318e+07	2.8855e+07	3.6151e+07	3.01592e+07							DGDDFTFSDDDESPE
C1_05850W	POL32	A0A1D8PDM8 [298-305]	A0A1D8PDM8 1xPhospho [S303]	DNA polymerase delta subunit	-0.923002	-0.111816	-0.797556	0.0136291	1.81398e+07	3.75251e+07	1.28896e+07	1.64687e+07	1.87669e+07	1.32584e+07	1.71194e+07	1.25175e+07					Y		KKDILPESPKEEQQS
C1_05850W	POL32	A0A1D8PDM8 [298-311]	A0A1D8PDM8 1xPhospho [S303]	DNA polymerase delta subunit	0.226941	0.826253	0.167841	0.767153	1.08498e+08	1.14999e+08	1.27189e+08	1.34381e+08	1.5517e+08	9.59016e+07	2.25751e+08	2.19418e+08					Y		KKDILPESPKEEQQS
C1_05850W	POL32	A0A1D8PDM8 [257-265]	A0A1D8PDM8 1xPhospho [T/S]	DNA polymerase delta subunit	1.50267	-1.13331	-0.156626	-2.7926	2.21249e+06	1.19097e+06	5.16148e+06	4.48276e+06	2.09477e+06	958538	1.39191e+06	0
C1_05900W	C1_05900W	A0A1D8PDN5 [102-114]	A0A1D8PDN5 1xPhospho [S]	Uncharacterized protein	3.50418	0	-9.06986	-12.574	536.402	0	2576.56	3520.1	0	0	0	0
C1_05900W	C1_05900W	A0A1D8PDN5 [102-117]	A0A1D8PDN5 1xPhospho [S104]	Uncharacterized protein	1.7008	2.67103	-1.36976	-0.399526	2658.93	0	0	8645.9	0	1028.27	2866.46	3687.82							TRTKKSSSIGSAELS
C1_05900W	C1_05900W	A0A1D8PDN5 [132-159]	A0A1D8PDN5 1xPhospho [S133]	Uncharacterized protein	13.3905	9.20627	0	-4.18423	0	0	2768.19	7969.33	0	0	0	589.697							KFIRSRSSGISDTST
C1_05900W	C1_05900W	A0A1D8PDN5 [161-184]	A0A1D8PDN5 1xPhospho [S177]	Uncharacterized protein	2.59433	0.865307	0.00998625	-1.71904	10172.9	23672	101181	103216	18487.5	15592.5	30397.4	31687.9			Y				ESEESNDSNEDIEDK
C1_05900W	C1_05900W	A0A1D8PDN5 [341-358]	A0A1D8PDN5 1xPhospho [S353]	Uncharacterized protein	2.94466	1.33289	0.924304	-0.687469	7359.22	6336.21	51563.8	53883.3	13421.3	12570.3	42051.6	23424.6			Y				ATTVSGDSPTALKRL
C1_05900W	C1_05900W	A0A1D8PDN5 [441-456]	A0A1D8PDN5 1xPhospho [S449]	Uncharacterized protein	1.60117	-1.5669	1.94712	-1.22094	541.091	0	1643.64	0	936.562	1152.77	0	704.554			Y				STAFSDESETAGDAK
C1_05900W	C1_05900W	A0A1D8PDN5 [520-530]	A0A1D8PDN5 1xPhospho [S523]	Uncharacterized protein	4.08708	-0.682008	2.51364	-2.25545	999.945	0	6325.35	10685.2	3645.44	2069.55	1844.29	1717.47							SGHRSSSSVPSTPLR
C1_05900W	C1_05900W	A0A1D8PDN5 [46-60]	A0A1D8PDN5 1xPhospho [S57]	Uncharacterized protein	11.8181	11.3379	0	-0.480276	0	0	2307.52	1302.35	0	0	1095.4	1492.02		Y					SESTEYTSPSKSLKS
C1_05900W	C1_05900W	A0A1D8PDN5 [650-667]	A0A1D8PDN5 1xPhospho [S651]	Uncharacterized protein	3.97208	-10.6003	0.940335	-13.632	807.956	0	7151.47	5542.78	878.97	672.396	0	0							VIKDAKKSPPMSSPP
C1_05900W	C1_05900W	A0A1D8PDN5 [690-704]	A0A1D8PDN5 1xPhospho [S692]	Uncharacterized protein	1.16377	-0.728508	-0.0166454	-1.90892	81969.3	107543	185209	239380	127405	59933	66642.2	46421.4							MGVPKSDSVGQNMTA
C1_05900W	C1_05900W	A0A1D8PDN5 [737-765]	A0A1D8PDN5 1xPhospho [S737]	Uncharacterized protein	11.8295	11.9407	0	0.111223	0	0	0	3638.33	0	0	1381.55	2548.44				Y			NSHGQRKSGGGDGGV
C1_05900W	C1_05900W	A0A1D8PDN5 [878-888]	A0A1D8PDN5 1xPhospho [S882]	Uncharacterized protein	5.29617	-4.21466	6.97089	-2.53995	520.233	0	12403.2	8076.22	41752.7	23631.4	3101.5	419.091							SSKFDQESQQEPTKQ
C1_05900W	C1_05900W	A0A1D8PDN5 [457-469]	A0A1D8PDN5 1xPhospho [T]	Uncharacterized protein	0.778758	2.58045	-0.997369	0.804326	3629.46	4135.27	7736.7	5585.61	890.158	2998.8	14216.6	9049.32
C1_05900W	C1_05900W	A0A1D8PDN5 [102-114]	A0A1D8PDN5 2xPhospho [S104; S107]	Uncharacterized protein	1.55553	0.296216	-0.36922	-1.62853	1539.57	1811.08	4876.4	4974.49	1464.77	1129.08	1448.61	1736.65			Y				TRTKKSSSIGSAELS	KKSSSIGSAELSPSR
C1_05900W	C1_05900W	A0A1D8PDN5 [161-184]	A0A1D8PDN5 2xPhospho [T169; S177]	Uncharacterized protein	11.7185	-9.40649	9.40649	-11.7185	0	0	0	3369.03	0	677.636	0	0			Y				TIEDFADTESEESND	ESEESNDSNEDIEDK
C1_05910W	SIP5	Q5AA26 [360-386]	Q5AA26 1xPhospho [S]	Protein SIP5	0.981659	0.371439	1.09643	0.48621	2.09104e+06	0	1.49884e+06	2.6304e+06	1.22637e+06	3.24478e+06	2.37228e+06	3.4118e+06
C1_05910W	SIP5	Q5AA26 [63-70]	Q5AA26 1xPhospho [S65]	Protein SIP5	-2.45824	0.175026	1.91267	4.54594	1.98901e+06	1.16794e+06	299431	275035	1.10223e+07	863821	9.16978e+06	4.24947e+06				Y		Y	NHHNRSGSHDLRKLK
C1_05930C	C1_05930C	A0A1D8PDN2 [2-23]	A0A1D8PDN2 1xAcetyl [N-Term]; 1xPhospho [S/T]	Glutamine amidotransferase subunit	0.51235	-0.0600213	-0.392772	-0.965143	1973.34	3054.87	3973.39	3199.12	2949.98	879.59	2128.86	1544.61
C1_05930C	C1_05930C	A0A1D8PDN2 [81-91]	A0A1D8PDN2 1xPhospho [S/T]	Glutamine amidotransferase subunit	0.795816	0.122822	-0.036581	-0.709576	72831.1	118356	189417	142496	141012	45387.8	97119.1	105845
C1_05930C	C1_05930C	A0A1D8PDN2 [616-626]	A0A1D8PDN2 1xPhospho [S618]	Glutamine amidotransferase subunit	1.17877	-0.769355	2.31216	0.364033	487.691	0	1105.32	0	1761.53	664.436	761.649	661.2							SGASKSLSLWDITTS
C1_05930C	C1_05930C	A0A1D8PDN2 [43-48]	A0A1D8PDN2 1xPhospho [T45]	Glutamine amidotransferase subunit	-0.61211	14.4334	-13.3504	1.69511	8774.31	1668.5	4724.38	2107.37	0	0	10569.8	11553.8		Y					ILTPRTHTPIRLNSP
C1_05980W	C1_05980W	Q5AA37 [2-21]	Q5AA37 1xPhospho [S]	1-phosphatidylinositol 4-kinase	0.197175	0.240052	-0.379621	-0.336744	2.50203e+07	2.80273e+07	1.95498e+07	4.12667e+07	2.0113e+07	2.06615e+07	2.30387e+07	2.51174e+07
C1_05980W	C1_05980W	Q5AA37 [109-117]	Q5AA37 1xPhospho [S111]	1-phosphatidylinositol 4-kinase	-2.23104	-1.09298	2.14415	3.28222	316894	356846	143509	0	2.43618e+06	541974	908341	487794							TPKIKSQSQPVSRRA
C1_05980W	C1_05980W	Q5AA37 [2-21]	Q5AA37 2xPhospho [Y3; S19]	1-phosphatidylinositol 4-kinase	1.66259	21.2253	-19.7897	-0.226993	906320	0	1.25449e+06	1.61479e+06	0	0	1.20458e+06	1.24697e+06							XXXXXMPYSNPDSSV	NHDMNSVSPKTTTTN
C1_06020W	RGD1	A0A1D8PDP3 [22-41]	A0A1D8PDP3 1xPhospho [S/T]	Rgd1p	-0.229134	-0.614788	1.00114	0.615487	56910.5	35249.4	35560.2	43065.6	93862.2	90604.3	63263.3	57197.9
C1_06020W	RGD1	A0A1D8PDP3 [207-211]	A0A1D8PDP3 1xPhospho [S209]	Rgd1p	0.509364	-0.18228	0.0722079	-0.619436	1014.51	1371.89	1242.21	2155.06	847.257	1661.67	1242.27	968.75							DPNKKSFSLKNKSVE
C1_06020W	RGD1	A0A1D8PDP3 [9-21]	A0A1D8PDP3 1xPhospho [T/S]	Rgd1p	0.11027	-0.984962	1.65153	0.556302	1055.91	885.544	542.552	1553.19	3409.75	2691.81	1772.25	1310
C1_06090C	C1_06090C	A0A1D8PDS9 [520-537]	A0A1D8PDS9 1xPhospho [S/T]	Serine/threonine protein kinase	-2.34616	-21.2466	-0.561566	-19.462	1.74173e+06	1.93031e+06	0	722174	1.30618e+06	1.18187e+06	0	0
C1_06090C	C1_06090C	A0A1D8PDS9 [432-460]	A0A1D8PDS9 1xPhospho [T/S]	Serine/threonine protein kinase	21.1246	22.0923	0	0.967704	0	0	1.04461e+06	1.24175e+06	0	0	2.40617e+06	2.06532e+06
C1_06090C	C1_06090C	A0A1D8PDS9 [62-76]	A0A1D8PDS9 1xPhospho [T73]	Serine/threonine protein kinase	1.47953	-0.740056	1.26494	-0.954653	1.7464e+06	0	2.00135e+06	2.86865e+06	2.04548e+06	2.15142e+06	0	2.51275e+06		Y	Y		Y		FNQSTPITPIKNAST
C1_06090C	C1_06090C	A0A1D8PDS9 [201-238]	A0A1D8PDS9 2xPhospho [S/Y]	Serine/threonine protein kinase	0	2.93689	19.8765	22.8134	0	0	0	0	962549	0	3.92279e+06	3.44803e+06
C1_06100C	MSI3	Q96VB9 [354-360]	Q96VB9 1xPhospho [S355]	Heat shock protein homolog SSE1 (Chaperone protein MSI3)	0	-1.81074	6.21208	4.40134	0	0	0	0	48.8681	24.2667	11.2406	8.89114			Y				PAVKTRISEIFGKPL
C1_06100C	MSI3	Q96VB9 [46-54]	Q96VB9 1xPhospho [S46]	Heat shock protein homolog SSE1 (Chaperone protein MSI3)	6.74288	-4.76985	4.76985	-6.74288	0	0	34.0502	72.0547	17.7907	8.49068	0	0							LVGFGHKSRYLGESA
C1_06100C	MSI3	Q96VB9 [557-565]	Q96VB9 1xPhospho [S559]	Heat shock protein homolog SSE1 (Chaperone protein MSI3)	-3.19927	-6.05115	2.85187	0	8.18494	0	0	0	50.0594	15.2502	0	0							AFIEKEASMVMEDKL
C1_06100C	MSI3	Q96VB9 [594-601]	Q96VB9 1xPhospho [S597]	Heat shock protein homolog SSE1 (Chaperone protein MSI3)	0.00462382	-5.71662	0.947125	-4.77412	17.2896	8.98523	10.7386	15.6237	40.8528	10.7337	0	0							EEYKDFASDQEKEKL
C1_06100C	MSI3	Q96VB9 [631-642]	Q96VB9 1xPhospho [S636]	Heat shock protein homolog SSE1 (Chaperone protein MSI3)	-4.11588	-4.7944	0.678522	0	16.3381	0	0	0	26.7496	0	0	0							AKYEELASIGNVIKG
C1_06220C	C1_06220C	A0A1D8PDR0 [23-31]	A0A1D8PDR0 1xPhospho [T25]	Uncharacterized protein	0	-5.42688	25.0583	19.6314	0	0	0	0	2.41204e+07	1.08179e+07	812172	0							GVFNKLVTLVNQQRS
C1_06280C	UME6	Q59MD2 [1-25]	Q59MD2 1xAcetyl [N-Term]; 1xPhospho [S/T]	Transcriptional regulatory protein UME6	15.632	15.0202	0	-0.611867	0	0	11237	39544.5	0	0	12447.3	20781.2
C1_06280C	UME6	Q59MD2 [26-38]	Q59MD2 1xPhospho [S]	Transcriptional regulatory protein UME6	-2.98737	-1.76378	-2.8697	-1.64611	1.3229e+06	0	44636.8	122179	76051.1	104940	25426.4	27870.6
C1_06280C	UME6	Q59MD2 [414-426]	Q59MD2 1xPhospho [S414]	Transcriptional regulatory protein UME6	-5.48162	13.5764	-20.8164	-1.75836	0	1.84657e+06	14512	26813.9	0	0	7532.02	4682.52							DEPSKEKSPNMLNST
C1_06280C	UME6	Q59MD2 [495-502]	Q59MD2 1xPhospho [S497]	Transcriptional regulatory protein UME6	-6.87822	-2.74583	-5.98371	-1.85132	758812	1.46108e+06	5675.15	13194.3	29473.1	5605.71	3301.75	1927							VTPPKTLSPLLRKKT
C1_06280C	UME6	Q59MD2 [495-501]	Q59MD2 1xPhospho [S497]	Transcriptional regulatory protein UME6	-6.20236	-1.776	-5.21227	-0.785905	3099484	2.62465e+06	28842.9	48890.3	78313.9	76089.5	30126.1	14957.8							VTPPKTLSPLLRKKT
C1_06280C	UME6	Q59MD2 [467-494]	Q59MD2 1xPhospho [T491]	Transcriptional regulatory protein UME6	-7.52075	-1.32607	-7.73326	-1.53857	57123184	6.56119e+07	291032	377305	232896	343904	140908	89150.4		Y					NNNNDIVTPPKTLSP
C1_06320W	C1_06320W	A0A1D8PDU5 [517-537]	A0A1D8PDU5 1xPhospho [S530]	Uncharacterized protein	-12.9341	-0.0563599	-1.65165	11.2261	7825.05	0	0	0	1015.91	1473.93	944.075	1450.33							DTNDILSSPILQQQK
C1_06320W	C1_06320W	A0A1D8PDU5 [538-547]	A0A1D8PDU5 1xPhospho [S538]	Uncharacterized protein	-4.81651	-0.630715	-3.8781	0.307691	6960.45	12716	287.34	409.981	398.47	938.8	449.1	414.231							PILQQQKSMPSINAT
C1_06320W	C1_06320W	A0A1D8PDU5 [683-690]	A0A1D8PDU5 1xPhospho [S685]	Uncharacterized protein	-4.1226	0.189	-3.59468	0.716914	82529.5	38864.2	3222.43	3745.62	3079.71	6967.57	4998.92	6454.85				Y			SKHQRTFSNQFIKCK
C1_06400C	C1_06400C	A0A1D8PDS6 [73-85]	A0A1D8PDS6 1xPhospho [T83]	Uncharacterized protein	7.10908	11.8341	-11.5814	-6.85636	3063.4	0	423049	0	0	0	0	3650.07							ANLIPLGTPRTRKPN
C1_06410W	C1_06410W	A0A1D8PDT1 [214-220]	A0A1D8PDT1 1xPhospho [S216]	Uncharacterized protein	0.549763	-2.44237	2.23299	-0.759143	7968.19	5862.98	9940.38	10306.8	57296.1	7729.09	7277.56	4685.01	Y						RLKHRRFSNDDKSLT
C1_06410W	C1_06410W	A0A1D8PDT1 [342-352]	A0A1D8PDT1 1xPhospho [S344]	Uncharacterized protein	0.127483	-1.19136	2.32819	1.00934	7767.8	0	3703.21	4782.33	31160.4	7851.51	9174.69	7907.62							KYFNKITSPSQLTGF
C1_06410W	C1_06410W	A0A1D8PDT1 [3-25]	A0A1D8PDT1 1xPhospho [T18]	Uncharacterized protein	3.22659	1.26665	2.59289	0.632948	1946.3	0	8774.86	9451.94	10423.9	1323.22	14425.1	13840.3							NNNNNNNTPPPTGPR
C1_06410W	C1_06410W	A0A1D8PDT1 [186-209]	A0A1D8PDT1 2xPhospho [S196; S197]	Uncharacterized protein	2.66213	0.537468	1.58471	-0.53996	4628.12	0	9951.23	19348.7	12070.9	1812.96	10778.3	9373.6							DVNSDMNSSDDDDDD	VNSDMNSSDDDDDDD
C1_06420C	C1_06420C	A0A1D8PDT2 [2-19]	A0A1D8PDT2 1xAcetyl [N-Term]; 1xPhospho [S]	Uncharacterized protein	-6.35872	-1.69657	-4.50733	0.15482	5837085	54966.6	27213.3	44581.8	117114	141960	40894.3	39034
C1_06420C	C1_06420C	A0A1D8PDT2 [445-470]	A0A1D8PDT2 1xPhospho [S/T]	Uncharacterized protein	-6.49618	-2.21812	-4.26331	0.0147628	2.10148e+06	6642.72	9406.39	13946	61451.5	48324.9	23592.6	0
C1_06420C	C1_06420C	A0A1D8PDT2 [276-285]	A0A1D8PDT2 1xPhospho [S280]	Uncharacterized protein	-7.72278	11.9647	-20.0529	-0.365415	1.08416e+06	3587.14	2446.39	2701.79	0	0	1560.97	2435.06							VFRNTNNSTETIKSD
C1_06420C	C1_06420C	A0A1D8PDT2 [331-339]	A0A1D8PDT2 1xPhospho [S336]	Uncharacterized protein	1.16542	-15.068	1.47038	-14.7631	0	12395.4	12995.1	14808.8	14469.2	19879.7	0	0		Y					SKNSFTPSPARSTES
C1_06420C	C1_06420C	A0A1D8PDT2 [414-421]	A0A1D8PDT2 1xPhospho [S416]	Uncharacterized protein	-5.87673	-1.43024	-4.41354	0.0329522	1.35638e+07	63023.6	83202.8	148707	336730	302687	94860.7	142407							SMVMRTPSAPSLRNT
C1_06450C	RPS14B	A0A1D8PDT3 [2-13]	A0A1D8PDT3 1xAcetyl [N-Term]; 1xPhospho [S/T]	Ribosomal 40S subunit protein S14B	1.44845	-0.231883	2.33884	0.65851	15.8599	0	7.07569	37.9375	59.1057	25.1881	40.8835	30.7461
C1_06450C	RPS14B	A0A1D8PDT3 [110-122]	A0A1D8PDT3 1xPhospho [S118]	Ribosomal 40S subunit protein S14B	-0.0646245	-0.380966	0.802569	0.486227	249.04	138.038	219.065	151.013	289.602	386.285	296.808	221.989							EDVTPVPSDSTRRKG
C1_06450C	RPS14B	A0A1D8PDT3 [48-65]	A0A1D8PDT3 1xPhospho [S51]	Ribosomal 40S subunit protein S14B	1.9209	0.831568	0.914546	-0.174786	11.7575	29.2784	75.9655	82.2072	49.4794	28.7572	66.7123	73.2987							KADRDESSPYAAMLA
C1_06450C	RPS14B	A0A1D8PDT3 [88-98]	A0A1D8PDT3 1xPhospho [T88]	Ribosomal 40S subunit protein S14B	0.152788	-0.579281	0.937985	0.205916	196.116	377.098	271.395	365.968	555.769	543.339	391.509	343.79							TGGTKTKTPGPGGQS
C1_06450C	RPS14B	A0A1D8PDT3 [86-98]	A0A1D8PDT3 1xPhospho [T88]	Ribosomal 40S subunit protein S14B	3.10865	0.46534	3.25537	0.612066	11.8178	15.5217	10.68	232.769	174.398	95.2199	142.915	229.712							TGGTKTKTPGPGGQS
C1_06480C	C1_06480C	A0A1D8PDT9 [24-35]	A0A1D8PDT9 1xPhospho [T32]	PRA1 family protein	10.2733	-8.79267	8.79267	-10.2733	0	0	754.301	482.249	251.078	191.384	0	0							DFSSVQSTISKLRPP
C1_06500W	C1_06500W	Q5AAP7 [215-224]	Q5AAP7 1xPhospho [S218]	DUF2012 domain-containing protein	-0.309892	-0.00226801	0.47186	0.779484	18372920	1.31939e+07	1.39356e+07	1.15294e+07	2.31128e+07	2.06671e+07	2.96052e+07	1.41059e+07							LGEKVIESPEPTIKS
C1_06520C	BPH1	A0A1D8PDU1 [929-939]	A0A1D8PDU1 2xPhospho [S932; S935]	Bph1p	0.222354	0.755642	0.533793	1.06708	2.86655e+06	2.26754e+06	3.18461e+06	2.805e+06	3.52716e+06	3.90562e+06	4.81951e+06	7.72988e+06			Y				KSGKLLHSNPSTPIK	KLLHSNPSTPIKSNN
C1_06530C	C1_06530C	A0A1D8PDT6 [2-16]	A0A1D8PDT6 1xAcetyl [N-Term]; 1xPhospho [S]	Putative ubiquitin-specific protease	1.54425	1.41646	1.70685	1.57906	5594.91	7595.63	24712.8	13759.6	19813.2	23249.2	24685.4	90262.4
C1_06530C	C1_06530C	A0A1D8PDT6 [934-961]	A0A1D8PDT6 1xPhospho [S]	Putative ubiquitin-specific protease	-11.2943	1.73976	1.65267	14.6867	1061.68	1448.79	0	0	2787	5108.44	5962.01	20409.4
C1_06530C	C1_06530C	A0A1D8PDT6 [699-715]	A0A1D8PDT6 1xPhospho [S711]	Putative ubiquitin-specific protease	0	1.27299	10.9581	12.2311	0	0	0	0	1514.5	473.936	1643.16	3163.53							LSQPLETSDCEKNNN
C1_06530C	C1_06530C	A0A1D8PDT6 [698-715]	A0A1D8PDT6 1xPhospho [S711]	Putative ubiquitin-specific protease	0.00826067	1.47253	2.53551	3.99978	3688.14	3737.6	5222.66	2245.73	24017.4	19040.5	18345.4	101146							LSQPLETSDCEKNNN
C1_06530C	C1_06530C	A0A1D8PDT6 [1345-1372]	A0A1D8PDT6 1xPhospho [T/S]	Putative ubiquitin-specific protease	1.81644	2.71104	2.01835	2.91295	292.643	485.257	1865.47	876.909	0	3154.48	2592.02	18068.9
C1_06540C	C1_06540C	A0A1D8PDW1 [30-40]	A0A1D8PDW1 1xPhospho [S34]	Exosome non-catalytic core subunit	-0.321035	0.191897	0.861916	1.37485	1.48548e+06	0	564779	624338	729023	1.97076e+06	1.79028e+06	1.29358e+06							ELKQVTFSPEVLARI
C1_06570W	ANT1	Q5AAQ7 [2-8]	Q5AAQ7 1xAcetyl [N-Term]; 1xPhospho [S4]	Ant1p	-0.640399	-11.7837	0.41115	-10.7321	2650.39	0	1699.96	0	0	3524.67	0	0							XXXXMSLSPIEKAAS
C1_06570W	ANT1	Q5AAQ7 [44-64]	Q5AAQ7 1xPhospho [T/S]	Ant1p	-0.536232	-0.343467	0.50209	0.694855	38259.3	53034.2	27699.2	35253.7	50742	78554	49337.2	52566.6
C1_06580W	RPS23A	A0A1D8PDU3 [40-50]	A0A1D8PDU3 1xPhospho [S]	Ribosomal 40S subunit protein S23B	-0.904896	2.07838	1.19015	4.17343	2170.6	2711.48	1206.25	1400.66	8749.28	2391.76	21902.1	25153.6
C1_06630W	C1_06630W	A0A1D8PDU2 [351-379]	A0A1D8PDU2 1xPhospho [S/T]	Chromatin-binding protein	0.576944	6.30323	0.0891726	5.81546	172524	128175	57063.8	391486	104952	214920	2.51379e+07	122445
C1_06630W	C1_06630W	A0A1D8PDU2 [429-438]	A0A1D8PDU2 1xPhospho [S]	Chromatin-binding protein	0.497692	4.56938	2.48699	6.55868	37070.7	56993.5	16409.5	116405	161703	365632	1.24541e+07	65976.1
C1_06630W	C1_06630W	A0A1D8PDU2 [856-871]	A0A1D8PDU2 1xPhospho [S870]	Chromatin-binding protein	-0.41842	5.74551	0.423452	6.58738	129625	73519.8	31990.4	120011	84993.4	187450	1.45518e+07	64897.1							LVDIDGDSDXXXXXX
C1_06630W	C1_06630W	A0A1D8PDU2 [861-871]	A0A1D8PDU2 1xPhospho [S870]	Chromatin-binding protein	1.07009	4.28062	2.17276	5.3833	259496	347541	132466	1.14204e+06	1.02699e+06	1.71005e+06	5.29717e+07	224046							LVDIDGDSDXXXXXX
C1_06630W	C1_06630W	A0A1D8PDU2 [429-438]	A0A1D8PDU2 2xPhospho [S429; S431]	Chromatin-binding protein	-0.273116	2.37074	2.42062	5.06448	20188.9	32661.1	0	43734.9	156853	126111	1.45009e+06	13421.1				Y			NGHKRYKSRSPSEAI	HKRYKSRSPSEAIPK
C1_06660W	C1_06660W	A0A1D8PDV1 [31-51]	A0A1D8PDV1 1xPhospho [S/Y/T]	IFRD domain-containing protein	-1.17689	0.749662	-2.00972	-0.0831686	112663	94303.8	40512.8	51028.8	35220.1	16173.3	51635.1	34778.5
C1_06660W	C1_06660W	A0A1D8PDV1 [15-30]	A0A1D8PDV1 1xPhospho [S]	IFRD domain-containing protein	-0.682532	-1.33359	-0.658321	-1.30938	6736.81	5937.26	1258.04	6638.43	5645.28	2384.84	1226.49	1959.1
C1_06660W	C1_06660W	A0A1D8PDV1 [35-51]	A0A1D8PDV1 1xPhospho [S]	IFRD domain-containing protein	1.56742	-3.02481	2.30258	-2.28966	18393.3	17812.7	11207.1	96100.3	86120.5	92501.3	9683.81	12262.3
C1_06660W	C1_06660W	A0A1D8PDV1 [12-24]	A0A1D8PDV1 1xPhospho [S19]	IFRD domain-containing protein	-0.381603	-10.978	0.336053	-10.2603	1596.85	0	0	1225.48	1520.5	495.466	0	0							FERDGTLSNSSSRAQ
C1_06660W	C1_06660W	A0A1D8PDV1 [31-51]	A0A1D8PDV1 2xPhospho [S/T/Y]	IFRD domain-containing protein	-0.935715	0.53299	-1.77048	-0.301771	328696	294495	117743	208050	134300	48363.9	142336	121965
C1_06660W	C1_06660W	A0A1D8PDV1 [35-51]	A0A1D8PDV1 2xPhospho [S38; S/T]	IFRD domain-containing protein	-0.528864	-0.84561	-0.30575	-0.622496	0	10043.2	911.857	6048.75	5187.72	2937.22	686.219	3834.67			Y				TPLRSDDSDYESDTE
C1_06660W	C1_06660W	A0A1D8PDV1 [15-30]	A0A1D8PDV1 2xPhospho [T/S]	IFRD domain-containing protein	-0.180387	-4.5264	0.441072	-3.90494	9144.1	4174.13	3353.24	8399.53	12070.5	6010.81	0	783.644
C1_06660W	C1_06660W	A0A1D8PDV1 [31-51]	A0A1D8PDV1 3xPhospho [S/Y/T]	IFRD domain-containing protein	0.0055233	-0.18956	-2.39893	-2.59402	172943	261636	152150	284096	59300.5	23097	32826.7	39425.3
C1_06670W	C1_06670W	A0A1D8PDX7 [465-473]	A0A1D8PDX7 1xPhospho [S/T]	Uncharacterized protein	0.518264	-1.40108	0.625718	-1.29362	1.7369e+07	7.02234e+06	1.41648e+07	2.07692e+07	2.39434e+07	1.3692e+07	6.93161e+06	7.31889e+06
C1_06670W	C1_06670W	A0A1D8PDX7 [599-613]	A0A1D8PDX7 1xPhospho [S]	Uncharacterized protein	-0.000531406	0.0361519	-0.183275	-0.146592	2.13753e+07	3.81876e+07	2.85489e+07	3.09921e+07	2.69542e+07	2.55029e+07	2.60315e+07	2.77567e+07
C1_06670W	C1_06670W	A0A1D8PDX7 [391-399]	A0A1D8PDX7 1xPhospho [S393]	Uncharacterized protein	-1.25949	-1.38009	0.798357	0.677755	4701103	4.81462e+06	1.32169e+06	2.65295e+06	1.07186e+07	5.83042e+06	3.22872e+06	3.12931e+06						Y	SAPTRSNSVIDLSKI
C1_06670W	C1_06670W	A0A1D8PDX7 [428-439]	A0A1D8PDX7 1xPhospho [S430]	Uncharacterized protein	-1.45553	-1.7095	0.593599	0.33963	4.18627e+06	2.99195e+06	559489	2.05785e+06	5.3427e+06	5.48928e+06	1.55192e+06	1.76015e+06							KINSRVNSQVNLSSF
C1_06670W	C1_06670W	A0A1D8PDX7 [579-593]	A0A1D8PDX7 1xPhospho [S579]	Uncharacterized protein	24.2482	0	0	-24.2482	0	0	7.47534e+06	1.24514e+07	0	0	0	0							SSSTQRKSQQSLFQP
C1_06670W	C1_06670W	A0A1D8PDX7 [597-613]	A0A1D8PDX7 2xPhospho [S599; S601]	Uncharacterized protein	-0.486986	-0.0141826	0.210626	0.683429	1.66251e+06	3.18503e+06	2.64438e+06	814405	3.63115e+06	1.97838e+06	3.90615e+06	1.6485e+06						Y	SKVNRQRSLSSGGEN	VNRQRSLSSGGENRP
C1_06670W	C1_06670W	A0A1D8PDX7 [599-613]	A0A1D8PDX7 2xPhospho [S601; S]	Uncharacterized protein	-0.472242	-20.8257	2.41053	-17.943	349568	0	251984	0	928722	929826	0	0						Y	VNRQRSLSSGGENRP
C1_06670W	C1_06670W	A0A1D8PDX7 [597-613]	A0A1D8PDX7 3xPhospho [S599; S601; S602]	Uncharacterized protein	0	-0.860431	20.6373	19.7769	0	0	0	0	893829	737150	524629	373695			Y			Y	SKVNRQRSLSSGGEN	VNRQRSLSSGGENRP	NRQRSLSSGGENRPG
C1_06690W	CYK3	A0A1D8PDV9 [98-109]	A0A1D8PDV9 1xPhospho [T/S]	Cyk3p (Fragment)	0.679159	0.302472	0.195715	-0.180972	6.1514e+06	1.16988e+07	1.27426e+07	1.58393e+07	1.2076e+07	8.3677e+06	1.50079e+07	1.02044e+07
C1_06690W	CYK3	A0A1D8PDV9 [140-145]	A0A1D8PDV9 1xPhospho [T142]	Cyk3p (Fragment)	0.311829	-1.42561	0.484576	-1.25286	1.58051e+07	1.31368e+07	2.02454e+07	1.56796e+07	2.0402e+07	2.00927e+07	5.20798e+06	9.86673e+06		Y			Y		DRYSKPFTPTKGNVR
C1_06690W	CYK3	A0A1D8PDV9 [98-109]	A0A1D8PDV9 2xPhospho [T102; T/S]	Cyk3p (Fragment)	2.08845	-19.9401	-0.0140609	-22.0426	1.01579e+06	0	1.47065e+06	2.84942e+06	0	1.00594e+06	0	0							SRRSAGTTPLGNFSK
C1_06700W	C1_06700W	A0A1D8PDW3 [52-60]	A0A1D8PDW3 1xPhospho [S54]	Uncharacterized protein	0.13868	-0.558166	0.809685	0.112839	1.55097e+06	1.09997e+06	1.04021e+06	1.8782e+06	2.84626e+06	1.80039e+06	1.4639e+06	1.69194e+06							SDINRMNSLTSHDKQ
C1_06710W	KIN28	Q5AAS1 [170-185]	Q5AAS1 1xPhospho [S179]	TFIIH complex serine/threonine-protein kinase subunit	0.47737	0.0593488	0.493488	0.0754672	4.42967e+07	5.51561e+07	5.41311e+07	8.43273e+07	7.08584e+07	6.91557e+07	6.38462e+07	8.20478e+07							VNPNEDLSSNVVTRW
C1_06730W	RAC1	A0A1D8PDV5 [186-206]	A0A1D8PDV5 1xPhospho [S205]	Rho family GTPase	0	-8.28556	8.28556	0	0	0	0	0	72.4756	238.558	0	0			Y				GVNNSSGSKKHNEKN
C1_06740C	NOP6	Q5AAS4 [48-58]	Q5AAS4 1xPhospho [S53]	Nop6p	0	-9.99323	9.99323	0	0	0	0	0	1018.21	0	0	0							VKDTEQDSLEQPKKK
C1_06750W	C1_06750W	A0A1D8PDX3 [46-53]	A0A1D8PDX3 1xPhospho [S48]	Uncharacterized protein	0.44294	-0.875847	-1.13871	-2.4575	26378808	2.93667e+07	2.61807e+07	4.95982e+07	1.1946e+07	1.33717e+07	6.44978e+06	7.34668e+06						Y	RSPSRSVSPYAYRTR
C1_06780W	NPR1	A0A1D8PDY7 [2-39]	A0A1D8PDY7 1xAcetyl [N-Term]; 1xPhospho [S]	Serine/threonine protein kinase	0.396901	1.78718	0.153609	1.54389	10375.8	7637.47	9563.78	14154.2	8474.3	11562.9	41881.2	27277.5
C1_06780W	NPR1	A0A1D8PDY7 [95-120]	A0A1D8PDY7 1xPhospho [S116]	Serine/threonine protein kinase	-1.18269	1.43571	-1.34764	1.27076	13265.3	22622.9	1826.52	13982.7	7647.73	6453.41	21820.9	16326.5							AVHGFDPSPNTKVSF
C1_06780W	NPR1	A0A1D8PDY7 [136-151]	A0A1D8PDY7 1xPhospho [S140]	Serine/threonine protein kinase	-1.55213	-0.752264	-1.95295	-1.15309	7041.41	5689	0	4340.5	1741.47	1545.88	0	1951.2							FTRQSSNSFSSNQAF
C1_06780W	NPR1	A0A1D8PDY7 [191-205]	A0A1D8PDY7 1xPhospho [S202]	Serine/threonine protein kinase	-3.87118	2.10699	-4.55093	1.42725	13702.4	32613.2	0	3164.15	1256.71	718.222	7103.95	1407.19							SHSGNTGSLQRENSF
C1_06780W	NPR1	A0A1D8PDY7 [339-346]	A0A1D8PDY7 1xPhospho [S341]	Serine/threonine protein kinase	-0.662264	-0.957197	-0.305292	-0.600226	2762.96	3342.17	0	3857.38	3868.31	1072.25	1532.98	1011.2							SAPTRHNSMANLKRF
C1_06780W	NPR1	A0A1D8PDY7 [352-370]	A0A1D8PDY7 1xPhospho [S368]	Serine/threonine protein kinase	-10.8521	0.171413	0.604387	11.6279	743.643	1103.83	0	0	1752.77	1056.53	1462.13	1701.72							GTSNLSSSLRSASSG
C1_06780W	NPR1	A0A1D8PDY7 [56-63]	A0A1D8PDY7 1xPhospho [S58]	Serine/threonine protein kinase	-0.64739	-1.59853	-0.642019	-1.59316	7497.25	4852.27	1231.8	6652.19	5247.31	2666.09	1191.72	1420.72							PVLSRNTSEVTFKDQ
C1_06780W	NPR1	A0A1D8PDY7 [83-92]	A0A1D8PDY7 1xPhospho [S83]	Serine/threonine protein kinase	-0.270882	0.836763	-1.89241	-0.784767	18677.6	15840.6	6052.38	22556.6	5464.91	3832.05	8381.56	8223.95							SDTVDAKSPGITIDV
C1_06780W	NPR1	A0A1D8PDY7 [351-370]	A0A1D8PDY7 1xPhospho [T353]	Serine/threonine protein kinase	0	11.1217	0	11.1217	0	0	0	0	0	0	1324.28	902.97	Y						KRFFKKSTPTTSQPV
C1_06810W	CAT1	O13289 [477-484]	O13289 1xPhospho [S482]	Peroxisomal catalase (EC 1.11.1.6)	-0.519512	0.632392	-0.462467	0.689437	0	70.2944	48.7355	0	33.5657	17.1758	31.7164	47.4898		Y					KKEVLELSPRKXXXX
C1_06810W	CAT1	O13289 [477-485]	O13289 1xPhospho [S482]	Peroxisomal catalase (EC 1.11.1.6)	0.420245	0.738744	-1.36558	-1.04708	1056.05	1241.89	1280.4	1794.93	620.846	270.323	711.611	776.172		Y					KKEVLELSPRKXXXX
C1_06820W	C1_06820W	Q5AAT3 [279-294]	Q5AAT3 1xPhospho [S/T]	C2H2-type domain-containing protein	-12.0658	-1.09207	2.14229	13.116	549.748	3736.45	0	0	7732.16	11193.1	4443.05	4434.05
C1_06820W	C1_06820W	Q5AAT3 [12-24]	Q5AAT3 1xPhospho [S/T]	C2H2-type domain-containing protein	-0.398048	-1.37995	1.69557	0.713662	33728.7	24717	20122.6	24230.7	42913.5	146397	30420.6	42317.7
C1_06820W	C1_06820W	Q5AAT3 [314-327]	Q5AAT3 1xPhospho [S]	C2H2-type domain-containing protein	0.517849	-0.742781	0.209055	-1.05157	24686.2	22999.6	33354.8	34923.1	17612.8	37508.9	16725.5	16214.1
C1_06820W	C1_06820W	Q5AAT3 [313-327]	Q5AAT3 1xPhospho [S]	C2H2-type domain-containing protein	0.883976	-1.56547	1.26617	-1.18328	3010.74	1644.93	1643.69	6948.97	2020.41	9178.89	2349.4	1433.81
C1_06820W	C1_06820W	Q5AAT3 [314-330]	Q5AAT3 1xPhospho [S]	C2H2-type domain-containing protein	1.51883	1.19533	0.66579	0.342295	1754.76	3101.46	6208.89	7708.85	2497.32	5207.35	7918.1	9726.69
C1_06820W	C1_06820W	Q5AAT3 [13-24]	Q5AAT3 1xPhospho [S15]	C2H2-type domain-containing protein	-0.826551	-3.57474	0.473662	-2.27452	650.476	8392.9	1970.94	3127.97	2410.6	10147.7	0	1053.05							NYNRRNSSATPYTIP
C1_06820W	C1_06820W	Q5AAT3 [89-98]	Q5AAT3 1xPhospho [S90]	C2H2-type domain-containing protein	0	-10.3574	10.3574	0	0	0	0	0	1310.85	0	0	0	Y						EFVVRRISEGETGRL
C1_06820W	C1_06820W	Q5AAT3 [88-98]	Q5AAT3 1xPhospho [S90]	C2H2-type domain-containing protein	0.376221	0.837153	0.169032	0.629964	12870.9	6880.9	12560.4	13076.5	21347.4	859.714	24976	14698.3	Y						EFVVRRISEGETGRL
C1_06820W	C1_06820W	Q5AAT3 [88-96]	Q5AAT3 1xPhospho [S90]	C2H2-type domain-containing protein	11.8269	12.4349	0	0.607974	0	0	1482.13	2149.73	0	0	2673.96	2861.94	Y						EFVVRRISEGETGRL
C1_06820W	C1_06820W	Q5AAT3 [313-330]	Q5AAT3 2xPhospho [S316; S318]	C2H2-type domain-containing protein	12.4156	-11.6058	11.6058	-12.4156	0	0	2866.86	2595.77	827.726	2287.96	0	0							ILDKRTDSASDEEEE	DKRTDSASDEEEEVI
C1_06820W	C1_06820W	Q5AAT3 [314-327]	Q5AAT3 2xPhospho [S318; S/T]	C2H2-type domain-containing protein	1.69211	-4.39543	1.98608	-4.10146	18558.6	5112.03	42598.2	33890.4	17995.3	75781	1165.57	3289.39							DKRTDSASDEEEEVI
C1_06820W	C1_06820W	Q5AAT3 [313-327]	Q5AAT3 2xPhospho [S318; T/S]	C2H2-type domain-containing protein	-0.812679	-0.669756	0.197741	0.340663	33819.4	16407.8	2964.17	25631	20044.8	37561	19354.5	16856.9							DKRTDSASDEEEEVI
C1_06820W	C1_06820W	Q5AAT3 [313-330]	Q5AAT3 2xPhospho [S318; T/S]	C2H2-type domain-containing protein	-0.129007	-0.539186	2.01488	1.60471	3209.3	844.523	1798.34	1908.64	5573.28	10813.2	5888.95	5387.25							DKRTDSASDEEEEVI
C1_06820W	C1_06820W	Q5AAT3 [314-330]	Q5AAT3 2xPhospho [S318; T/S]	C2H2-type domain-containing protein	1.39957	0.411315	2.15123	1.16297	2831.82	3036.28	9680.59	5802.48	7326.57	18743.4	15578.9	19091.7							DKRTDSASDEEEEVI
C1_06820W	C1_06820W	Q5AAT3 [314-330]	Q5AAT3 2xPhospho [S318; T/S]	C2H2-type domain-containing protein	2.32275	10.3864	-9.80398	-1.74032	892.905	0	1983.04	2488.03	0	0	1337.5	0							DKRTDSASDEEEEVI
C1_06900C	MMD1	A0A1D8PDX5 [21-29]	A0A1D8PDX5 1xPhospho [T/S]	Isoleucine biosynthesis protein	-0.166448	-1.07572	2.61354	1.70427	1395.42	1661.27	1217.39	1506.11	12618.6	6093.57	6187.65	2689.51
C1_06930W	PGA63	Q5AAU3 [1127-1135]	Q5AAU3 1xPhospho [S/T]	Protein transport protein SEC31	-0.0637573	-5.89434	1.73298	-4.0976	165.772	108.889	87.0973	175.646	716.682	198.651	14.4056	0
C1_06930W	PGA63	Q5AAU3 [859-882]	Q5AAU3 1xPhospho [S/T]	Protein transport protein SEC31	-0.00631454	-0.194239	0.601745	0.41382	4524.53	4257.51	3745.76	4997.92	8340.85	4986.86	6621.91	5026.83
C1_06930W	PGA63	Q5AAU3 [909-954]	Q5AAU3 1xPhospho [S/T]	Protein transport protein SEC31	0.153921	-0.290987	1.21269	0.767787	5579.63	4929.19	6197.36	5494.75	13796	10561.6	10814.4	9093.89
C1_06930W	PGA63	Q5AAU3 [998-1024]	Q5AAU3 1xPhospho [S/T]	Protein transport protein SEC31	0.435969	0.206758	1.21054	0.981331	10720.5	8156.67	12037.8	13500	24271.7	19416.1	25921.7	24498.2
C1_06930W	PGA63	Q5AAU3 [956-968]	Q5AAU3 1xPhospho [S/T]	Protein transport protein SEC31	0.452389	-1.48114	1.02993	-0.903602	1083.39	361.951	814.35	1163.69	2085.53	866.797	626.738	430.157
C1_06930W	PGA63	Q5AAU3 [908-954]	Q5AAU3 1xPhospho [S/T]	Protein transport protein SEC31	0.508105	9.48303	-6.48285	2.49208	88.4402	0	72.6295	53.5706	0	0	325.441	389.17
C1_06930W	PGA63	Q5AAU3 [470-478]	Q5AAU3 1xPhospho [S473]	Protein transport protein SEC31	-3.68991	-3.3034	1.59925	1.98576	11.9054	0	0	0	38.1016	0	2.9607	0							NDEKEATSPETKKEN
C1_06930W	PGA63	Q5AAU3 [670-680]	Q5AAU3 1xPhospho [S675]	Protein transport protein SEC31	-4.25659	-7.42278	3.16619	0	18.1144	0	0	0	170.585	0	0	0							LKSEEITSPSDARLQ
C1_06930W	PGA63	Q5AAU3 [969-976]	Q5AAU3 1xPhospho [S971]	Protein transport protein SEC31	0.277148	-0.942268	0.175759	-1.04366	56.4393	10.5278	55.7302	25.6321	75.7728	0	30.7361	8.21754							PPPPKSISRSTSRTT
C1_06930W	PGA63	Q5AAU3 [973-990]	Q5AAU3 1xPhospho [S975]	Protein transport protein SEC31	0.517933	-1.64026	0.63237	-1.52583	589.129	185.594	451.98	657.78	723.489	477.967	184.021	200.724						Y	KSISRSTSRTTVPTS
C1_06930W	PGA63	Q5AAU3 [977-990]	Q5AAU3 1xPhospho [S988]	Protein transport protein SEC31	0.462798	0.0538966	0.480628	0.071726	796.571	326.742	758.166	790.377	803.947	763.864	780.3	847.228					Y		TSSTVPASPKPTPVS
C1_06930W	PGA63	Q5AAU3 [977-997]	Q5AAU3 1xPhospho [S988]	Protein transport protein SEC31	0.817182	0.254209	0.595654	0.0326809	4515.91	3016.18	6783.62	6488.4	7667.75	3714.94	7112.11	6464.01					Y		TSSTVPASPKPTPVS
C1_06930W	PGA63	Q5AAU3 [10-18]	Q5AAU3 1xPhospho [T12]	Protein transport protein SEC31	0	-1.05424	6.56543	5.5112	0	0	0	0	60.3891	33.3202	0	44.6075							SEIARTSTFAWSSKN
C1_06930W	PGA63	Q5AAU3 [847-882]	Q5AAU3 1xPhospho [Y/S/T]	Protein transport protein SEC31	1.28216	0.733264	1.01231	0.463409	1195.24	837.346	2310.15	2634.59	2627.79	1473.23	3627.29	3190.88
C1_06930W	PGA63	Q5AAU3 [973-997]	Q5AAU3 2xPhospho [S988; T/S]	Protein transport protein SEC31	0.425537	-0.306902	-0.0450377	-0.777477	239.116	130.737	94.5295	402.553	290.961	67.4939	102.749	186.825					Y		TSSTVPASPKPTPVS
C1_06930W	PGA63	Q5AAU3 [909-954]	Q5AAU3 2xPhospho [T/S]	Protein transport protein SEC31	-1.77177	-1.57184	0.562869	0.762793	364.352	1836.17	266.55	377.167	1688.4	1562.7	382.61	710.327
C1_06930W	PGA63	Q5AAU3 [998-1024]	Q5AAU3 2xPhospho [T/S]	Protein transport protein SEC31	-0.316642	-0.167525	1.48241	1.63153	4085.26	2641.97	2699.21	2702.12	9334.45	9464.24	7859.08	8878.58
C1_06930W	PGA63	Q5AAU3 [908-954]	Q5AAU3 2xPhospho [T919; S/T]	Protein transport protein SEC31	5.12057	0.689522	6.75051	2.31947	0	0	0	33.7891	60.4396	46.2335	82.8683	89.7815							AATPPVSTPTPVSAP
C1_06960W	SUI2	Q5AAU7 [287-300]	Q5AAU7 1xPhospho [S]	Translation initiation factor eIF2 subunit alpha	0.395083	-1.34199	1.29491	-0.44217	48.0277	72.5555	102.512	56.3723	297.318	0	76.293	40.386
C1_06960W	SUI2	Q5AAU7 [207-219]	Q5AAU7 1xPhospho [S214]	Translation initiation factor eIF2 subunit alpha	-7.40391	-1.27359	1.93492	8.06525	0	168.356	0	0	451.004	195.539	149.961	116.882							AAESVSTSQMQVKAK
C1_06960W	SUI2	Q5AAU7 [286-300]	Q5AAU7 1xPhospho [S294]	Translation initiation factor eIF2 subunit alpha	-9.65999e-05	-8.85032	1.95112	-6.8991	118.362	0	57.2323	61.1217	222.738	237.804	0	0							EAEDKDSSDEEDDAX
C1_06960W	SUI2	Q5AAU7 [286-300]	Q5AAU7 2xPhospho [S293; S294]	Translation initiation factor eIF2 subunit alpha	-0.766541	-0.792538	0.908648	0.882652	1379.98	1081.66	886.988	559.61	3693.07	928.998	1783.12	884.905							REAEDKDSSDEEDDA	EAEDKDSSDEEDDAX
C1_06960W	SUI2	Q5AAU7 [287-300]	Q5AAU7 2xPhospho [S293; S294]	Translation initiation factor eIF2 subunit alpha	-0.0936853	-0.889276	1.57425	0.778655	29.7188	108.414	85.2471	44.1377	390.123	23.186	105.367	117.312							REAEDKDSSDEEDDA	EAEDKDSSDEEDDAX
C1_06980C	C1_06980C	A0A1D8PDZ8 [7-35]	A0A1D8PDZ8 1xPhospho [S16]	Uncharacterized protein	1.69825	0.804688	2.13098	1.23741	4.34668e+06	0	8.00056e+06	6.10477e+06	9.86664e+06	9.17243e+06	1.4229e+07	1.90278e+07			Y				SSEETTDSIELQQPD
C1_07010W	C1_07010W	Q5AAV4 [193-208]	Q5AAV4 1xPhospho [S]	Uncharacterized protein	0.03778	-0.241611	-1.20161	-1.481	6.33613e+06	1.17562e+07	6.38188e+06	1.21905e+07	4.63067e+06	3.23571e+06	4.00691e+06	2.64647e+06
C1_07020C	PUT3	Q5AAV6 [43-60]	Q5AAV6 1xPhospho [S]	Put3p	1.03648	0.196096	1.73742	0.897028	1.8504e+06	0	1.6901e+06	2.10549e+06	2.86911e+06	3.30082e+06	3.44004e+06	3.6282e+06
C1_07080W	C1_07080W	Q5AAW4 [1-27]	Q5AAW4 1xAcetyl [N-Term]; 1xPhospho [Y/T/S]	Uncharacterized protein	-0.523791	-0.136389	0.429127	0.816529	4.76247e+07	5.07052e+07	3.71415e+07	3.1251e+07	7.28787e+07	5.95146e+07	5.59857e+07	6.44648e+07
C1_07080W	C1_07080W	Q5AAW4 [1-27]	Q5AAW4 1xAcetyl [N-Term]; 2xPhospho [T9; T/S]	Uncharacterized protein	-0.00557115	-2.51077	1.72811	-0.777083	954957	949615	0	1.89723e+06	4.35286e+06	1.95687e+06	0	1.10712e+06							FSHSGTQTPVSASYQ
C1_07110W	TAF145	A0A1D8PE08 [964-975]	A0A1D8PE08 1xPhospho [T967]	Taf145p	0.637949	0.0847089	-1.27498	-1.82822	116201	161659	316258	116125	59458.8	55361.3	72629.1	49134.7							NPFKPLFTPPPENVP
C1_07120W	GAP4	Q59WB3 [11-23]	Q59WB3 1xPhospho [S/T]	S-adenosylmethionine permease GAP4 (SAM permease) (Amino-acid permease GAP4)	0.580963	-2.19393	1.56163	-1.21327	9549.99	3349.63	8628.11	10668.2	25581.8	12498.1	3738.21	4583.56
C1_07120W	GAP4	Q59WB3 [24-35]	Q59WB3 1xPhospho [S/T]	S-adenosylmethionine permease GAP4 (SAM permease) (Amino-acid permease GAP4)	1.686	-4.69359	2.82717	-3.55243	3264.48	567.334	6716.31	5615.28	20259.8	6939.84	414.156	636.002
C1_07120W	GAP4	Q59WB3 [50-59]	Q59WB3 1xPhospho [T54]	S-adenosylmethionine permease GAP4 (SAM permease) (Amino-acid permease GAP4)	6.95551	-2.58845	9.21298	-0.330971	0	0	0	123.113	388.595	203.856	0	97.6698			Y				DSRYTYETVDQEKNY
C1_07120W	GAP4	Q59WB3 [11-23]	Q59WB3 2xPhospho [S/T]	S-adenosylmethionine permease GAP4 (SAM permease) (Amino-acid permease GAP4)	0.514604	-2.72798	3.38451	0.14193	274.388	0	392.42	0	1871.53	1003.45	181.317	251.774
C1_07130C	C1_07130C	A0A1D8PDZ7 [2-21]	A0A1D8PDZ7 1xPhospho [S4]	Uncharacterized protein	0.712514	0.594872	-0.155718	-0.27336	13579026	1.10731e+07	1.65316e+07	2.38647e+07	9.94336e+06	1.21865e+07	1.78416e+07	1.5582e+07							XXXXMVQSPSPQSEH
C1_07140C	RIA1	Q59WB7 [203-213]	Q59WB7 1xPhospho [S206]	GTPase	-2.13064	-2.00084	-1.09436	-0.964563	671.616	958.411	119.283	252.173	283.947	478.932	111.909	77.9505							LNWREAGSVGEFIEK
C1_07170C	ZCF23	Q59WB9 [81-95]	Q59WB9 1xPhospho [S89]	Glucose starvation modulator protein 1 (Zinc finger domain-containing protein 23)	-0.335912	-0.135786	0.492951	0.693077	3.15758e+06	2.85072e+06	2.61614e+06	2.14414e+06	4.08468e+06	4.37092e+06	3.68757e+06	4.00849e+06			Y				GPVSTSVSPMDSVKS
C1_07170C	ZCF23	Q59WB9 [81-95]	Q59WB9 2xPhospho [S89; T/S]	Glucose starvation modulator protein 1 (Zinc finger domain-containing protein 23)	-20.2534	0.260085	2.07009	22.5836	0	1.24992e+06	0	0	2.35219e+06	2.89639e+06	3.03711e+06	3.24833e+06			Y				GPVSTSVSPMDSVKS
C1_07190W	SOG2	Q59WC1 [402-420]	Q59WC1 1xPhospho [S]	Sog2p	1.0251	-0.637668	2.26864	0.605869	345440	644400	791029	1.2234e+06	1.93632e+06	2.83342e+06	1.69472e+06	1.37104e+06
C1_07190W	SOG2	Q59WC1 [233-243]	Q59WC1 1xPhospho [S235]	Sog2p	-0.831605	-0.424844	-0.519043	-0.112282	2.67502e+06	2.57731e+06	1.08713e+06	1.86417e+06	1.48122e+06	2.18403e+06	1.2736e+06	1.45672e+06							IARSKSGSISTSFSS
C1_07190W	SOG2	Q59WC1 [301-325]	Q59WC1 1xPhospho [T/S]	Sog2p	0.709831	-0.719202	2.17006	0.741029	3.69768e+06	0	3.72453e+06	2.32344e+06	7.5872e+06	9.05394e+06	4.23574e+06	5.87264e+06
C1_07190W	SOG2	Q59WC1 [214-230]	Q59WC1 1xPhospho [T]	Sog2p	0.153001	-0.8996	3.32073	2.26813	648692	0	721268	0	3.56707e+06	2.91449e+06	2.71047e+06	763878
C1_07250C	ALG9	A0A1D8PE04 [515-527]	A0A1D8PE04 1xPhospho [S523]	Mannosyltransferase (EC 2.4.1.-)	-26.6362	-19.7264	-6.9098	0	37285220	6.70153e+07	0	0	867420	0	0	0							LDPNEKHSTIGKLLY
C1_07260C	C1_07260C	Q59WC8 [1-24]	Q59WC8 1xAcetyl [N-Term]; 1xPhospho [S/T]	zf-primase domain-containing protein	0.450194	-0.516934	0.581051	-0.386077	9.76993e+06	1.50494e+07	1.68382e+07	1.70705e+07	1.85898e+07	1.85384e+07	1.25123e+07	1.34349e+07
C1_07260C	C1_07260C	Q59WC8 [1-24]	Q59WC8 1xAcetyl [N-Term]; 2xPhospho [T/S]	zf-primase domain-containing protein	0.564483	-0.144734	0.66922	-0.039998	1.19335e+06	2.81787e+06	1.96186e+06	3.97017e+06	3.58592e+06	2.79277e+06	2.63481e+06	3.13501e+06
C1_07260C	C1_07260C	Q59WC8 [47-58]	Q59WC8 1xPhospho [S50]	zf-primase domain-containing protein	-0.0623901	1.63277	-0.695499	0.999659	828302	0	340715	452531	0	511473	1.2537e+06	332419						Y	LKKRRSQSPSEDMSN
C1_07260C	C1_07260C	Q59WC8 [561-586]	Q59WC8 1xPhospho [S564]	zf-primase domain-containing protein	20.4723	20.8412	0	0.368863	0	0	0	1.45473e+06	0	0	933958	944586							KRKRVVVSDDEQPGM
C1_07260C	C1_07260C	Q59WC8 [46-58]	Q59WC8 2xPhospho [S48; S50]	zf-primase domain-containing protein	-18.4272	-2.27004	3.46181	19.6189	352475	0	0	0	2.71779e+06	1.16585e+06	425859	379310	Y					Y	KALKKRRSQSPSEDM	LKKRRSQSPSEDMSN
C1_07270W	SEC34	Q59WC9 [54-68]	Q59WC9 1xPhospho [S]	Golgi transport complex subunit	0	22.1476	0	22.1476	0	0	0	0	0	0	4.64611e+06	0
C1_07360W	STU1	Q59WD5 [952-961]	Q59WD5 1xPhospho [S]	Protein STU1	-1.61184	1.45345	1.55984	4.62513	24.7204	14.2717	0	12.0846	63.8725	53.0327	159.534	162.364
C1_07360W	STU1	Q59WD5 [531-544]	Q59WD5 1xPhospho [S]	Protein STU1	-0.493119	-0.885955	2.05117	1.65834	19.5255	15.6641	13.5578	11.1545	91.9457	57.0395	44.4351	35.7263
C1_07360W	STU1	Q59WD5 [570-582]	Q59WD5 1xPhospho [S]	Protein STU1	0.724534	-1.90697	2.16052	-0.470989	2.42118	0	2.45297	2.20008	14.2953	0	3.07851	0
C1_07360W	STU1	Q59WD5 [617-630]	Q59WD5 1xPhospho [S619]	Protein STU1	0.396283	-1.37189	1.01279	-0.755385	16.3006	0	12.2578	9.51164	0	33.9092	0	12.4884							QPAVRASSWTYPSTQ
C1_07370C	CPH1	P43079 [259-268]	P43079 1xPhospho [S]	Transcription factor CPH1	24.2002	-2.1324	24.3814	-1.95121	0	0	1.05516e+07	8.72316e+06	1.28545e+07	8.99956e+06	2.51782e+06	2.46661e+06
C1_07370C	CPH1	P43079 [440-448]	P43079 1xPhospho [T443]	Transcription factor CPH1	0.990917	0.0135789	-1.10441	-2.08174	572545	1.05177e+06	903266	2.32497e+06	755457	0	762601	0							FATRQVATPTYIKAI
C1_07380C	KSP1	Q59WD8 [435-447]	Q59WD8 1xPhospho [S/T]	Putative serine/threonine protein kinase	0.356241	1.3558	-0.583963	0.415601	5.17504e+06	8.86315e+06	7.3023e+06	1.06678e+07	5.36111e+06	4.00417e+06	1.17717e+07	1.21978e+07
C1_07380C	KSP1	Q59WD8 [93-100]	Q59WD8 1xPhospho [S]	Putative serine/threonine protein kinase	-0.655706	-3.0181	1.27791	-1.08449	108888	247557	226258	0	755143	109189	106694	0
C1_07380C	KSP1	Q59WD8 [558-564]	Q59WD8 1xPhospho [S560]	Putative serine/threonine protein kinase	-1.01866	-0.000166773	0.480065	1.49855	2.55126e+06	3.13722e+06	1.33048e+06	1.47721e+06	5.66433e+06	2.27e+06	4.68099e+06	3.25242e+06							ADGYKKHSPPQRYKK
C1_07380C	KSP1	Q59WD8 [57-73]	Q59WD8 1xPhospho [T/S]	Putative serine/threonine protein kinase	0.670452	1.9101	0.552726	1.79237	428790	1.54928e+06	1.13411e+06	2.01412e+06	2.25044e+06	651095	5.49354e+06	5.41145e+06
C1_07390W	C1_07390W	Q59WE0 [49-78]	Q59WE0 1xPhospho [S]	UBX domain-containing protein	0.844705	0.277461	-0.639357	-1.2066	1308.21	805.235	1949.56	1846.77	829.313	527.161	920.189	724.151
C1_07410C	SKP1	Q59WE2 [130-137]	Q59WE2 1xPhospho [S132]	SCF ubiquitin ligase subunit	-1.65101	0	-7.47642	-5.82541	65.8098	111.275	55.7053	0	0	0	0	0							AEMIKSKSPEELRRT
C1_07410C	SKP1	Q59WE2 [139-156]	Q59WE2 1xPhospho [S147]	SCF ubiquitin ligase subunit	0	6.98442	0	6.98442	0	0	0	0	0	0	44.6387	80.9862							FNIINDFSPEEEAAI
C1_07420C	PEX3	A0A1D8PE25 [101-132]	A0A1D8PE25 1xPhospho [S]	Pex3p	-19.0239	1.48666	0.402258	20.9128	533035	0	0	0	704447	0	0	1.97414e+06
C1_07440W	C1_07440W	A0A1D8PE20 [192-200]	A0A1D8PE20 1xPhospho [S197]	VASt domain-containing protein	-1.75868	-1.17004	1.29602	1.88466	1220.99	544.782	0	521.116	3557.96	779.363	0	1926.99		Y			Y		FKQPFPHSPSKSQLS
C1_07440W	C1_07440W	A0A1D8PE20 [273-292]	A0A1D8PE20 1xPhospho [S288]	VASt domain-containing protein	-0.599227	0.952529	-0.0666501	1.48511	15243.8	31628.3	15513.2	15427.1	40440.4	4315.47	40902.4	45712.9							TASADVDSLENKQIT
C1_07440W	C1_07440W	A0A1D8PE20 [51-63]	A0A1D8PE20 1xPhospho [S56]	VASt domain-containing protein	0	1.41864	9.72169	11.1403	0	0	0	0	734.988	108.359	1180.65	1075.57							HRNSQGSSDNSFEFR
C1_07440W	C1_07440W	A0A1D8PE20 [293-301]	A0A1D8PE20 1xPhospho [T/S]	VASt domain-containing protein	-1.73594	-13.0349	1.55451	-9.74442	1374.66	1481.49	565.77	290.985	7221.08	1170.3	0	0
C1_07440W	C1_07440W	A0A1D8PE20 [236-249]	A0A1D8PE20 2xPhospho [T240; S243]	VASt domain-containing protein	-0.31049	-0.111213	1.16837	1.36764	543.887	0	438.38	0	978.039	245.634	0	1132.81			Y		Y		ANKMISSTPPSPPPE	MISSTPPSPPPEDKK
C1_07440W	C1_07440W	A0A1D8PE20 [273-292]	A0A1D8PE20 2xPhospho [T281; S288]	VASt domain-containing protein	0	-10.8849	10.8849	0	0	0	0	0	1529.55	360.463	0	0							SLVDGAATASADVDS	TASADVDSLENKQIT
C1_07500C	LHP1	A0A1D8PE36 [223-230]	A0A1D8PE36 1xPhospho [S224]	Lhp1p	-4.2257	-7.29135	3.06565	0	11.8495	5.86006	0	0	155.644	0	0	0	Y						EVTKRRNSFNENHKG
C1_07500C	LHP1	A0A1D8PE36 [221-230]	A0A1D8PE36 1xPhospho [S224]	Lhp1p	-0.448417	1.56101	1.10177	3.1112	559.789	1149.88	608.085	644.574	1562.86	2107.54	5233.38	5598.47	Y						EVTKRRNSFNENHKG
C1_07500C	LHP1	A0A1D8PE36 [222-230]	A0A1D8PE36 1xPhospho [S224]	Lhp1p	0.463873	0	-3.513	-3.97688	10.4161	0	14.7456	0	0	0	0	0	Y						EVTKRRNSFNENHKG
C1_07500C	LHP1	A0A1D8PE36 [268-284]	A0A1D8PE36 1xPhospho [S273]	Lhp1p	-0.0379706	0.664429	1.31744	2.01983	0	40.0989	39.0313	0	101.428	0	88.2811	73.0607							EKVEEIDSTKENTEE
C1_07520C	IST2	A0A1D8PE41 [889-908]	A0A1D8PE41 1xPhospho [S/T]	Ist2p	0.0357093	-0.573188	1.66788	1.05898	537.182	571.476	306.042	830.424	2274.29	1250.61	1049.25	1319.62
C1_07520C	IST2	A0A1D8PE41 [889-907]	A0A1D8PE41 1xPhospho [S/T]	Ist2p	0.652649	-0.532632	1.70447	0.519193	5968.06	6191.18	7986.83	11128.7	20832.2	18798.2	12307.6	15088.3
C1_07520C	IST2	A0A1D8PE41 [695-708]	A0A1D8PE41 1xPhospho [S697]	Ist2p	0	1.27412	7.8683	9.14241	0	0	0	0	232.665	0	91.3524	472.768							DKVEKIASTEDAYST
C1_07520C	IST2	A0A1D8PE41 [69-75]	A0A1D8PE41 1xPhospho [S70]	Ist2p	8.09454	-4.14693	12.4253	0.183814	0	0	136.401	135.936	2440.11	3059.14	142.375	167.104							KLSSYKFSEEAEKDL
C1_07520C	IST2	A0A1D8PE41 [849-858]	A0A1D8PE41 1xPhospho [S852]	Ist2p	0.391062	2.58014	0.430576	2.61965	1307.38	694.498	1244.25	1381.24	1265.52	1432.9	206.294	15935.2			Y				DSTKSTLSNDETRKT
C1_07520C	IST2	A0A1D8PE41 [874-888]	A0A1D8PE41 1xPhospho [S882]	Ist2p	0	-2.76796	8.40107	5.63311	0	0	0	0	207.521	129.524	0	48.629							TVSSDKASSPIEDKE
C1_07520C	IST2	A0A1D8PE41 [881-888]	A0A1D8PE41 1xPhospho [S883]	Ist2p	5.0626	-7.22477	7.22477	-5.0626	0	0	32.4191	0	73.9182	74.6614	0	0							VSSDKASSPIEDKES
C1_07520C	IST2	A0A1D8PE41 [671-683]	A0A1D8PE41 1xPhospho [T672]	Ist2p	-8.10467	-1.85497	0.968143	7.21784	146.634	127.629	0	0	370.283	167.221	75.3211	72.5416							DELWEKFTPQSTLNF
C1_07520C	IST2	A0A1D8PE41 [881-907]	A0A1D8PE41 2xPhospho [S/T]	Ist2p	0.214636	1.68083	-0.0605094	1.40568	134.466	410.415	474.536	157.911	206.438	316.021	839.741	837.531
C1_07520C	IST2	A0A1D8PE41 [889-908]	A0A1D8PE41 2xPhospho [S903; T/S]	Ist2p	-1.78112	-1.4563	0.858032	1.18285	315.644	338.812	0	189.71	859.68	327.375	256.168	175.789			Y				GSSTSTPSGTDKKTS
C1_07520C	IST2	A0A1D8PE41 [889-907]	A0A1D8PE41 2xPhospho [T/S]	Ist2p	-0.862078	-1.63028	1.08062	0.312417	1017.3	342.284	323.745	423.795	1382.26	1494.31	471.097	457.431
C1_07520C	IST2	A0A1D8PE41 [889-907]	A0A1D8PE41 3xPhospho [T899; S900; S903]	Ist2p	-6.77112	1.60673	2.44336	10.8212	108.222	0	0	0	356.783	236.286	1211.61	596.695			Y				PSLAGSSTSTPSGTD	SLAGSSTSTPSGTDK	GSSTSTPSGTDKKTS
C1_07540C	BBC1	A0A1D8PE54 [404-419]	A0A1D8PE54 1xPhospho [S/T]	Bbc1p	0.167617	-0.479289	0.710308	0.0634017	13030.5	7788.8	10824.3	12560.1	23769.1	10295.1	13666.3	10768.7
C1_07540C	BBC1	A0A1D8PE54 [84-104]	A0A1D8PE54 1xPhospho [S/T]	Bbc1p	2.34744	-1.07069	1.27178	-2.14635	3275.85	1304.8	10826.8	12489.2	6720.88	4340.91	2706.73	2559.17
C1_07540C	BBC1	A0A1D8PE54 [634-671]	A0A1D8PE54 1xPhospho [S]	Bbc1p	0.206455	-0.0791529	-0.704153	-0.989761	2357.01	4041.53	2783.32	4599.79	2190.43	1736.63	2032.63	1684.73
C1_07540C	BBC1	A0A1D8PE54 [695-702]	A0A1D8PE54 1xPhospho [S]	Bbc1p	0.487646	-1.52939	0.972576	-1.04446	13096.6	21418.7	20976.8	27419.4	45274.7	22457	14025.7	9437.52
C1_07540C	BBC1	A0A1D8PE54 [84-105]	A0A1D8PE54 1xPhospho [S102]	Bbc1p	1.7623	-1.35469	1.38288	-1.73411	7838.69	18166.4	37072.7	51148.6	38874.7	28944.9	15522.8	10995.3		Y					NAPVETTSPKKSIEK
C1_07540C	BBC1	A0A1D8PE54 [202-205]	A0A1D8PE54 1xPhospho [S203]	Bbc1p	1.82294	-1.10717	-0.291291	-3.2214	252.574	524.898	1237.23	1516.01	404.212	230.932	294.301	0							EEEIPKLSLKERIAL
C1_07540C	BBC1	A0A1D8PE54 [57-83]	A0A1D8PE54 1xPhospho [S80]	Bbc1p	0.599321	-0.0455886	-0.307984	-0.952894	14313.4	18886.4	23181.3	27117	16141.6	10676	12357.5	13625.9		Y			Y		PEEPNPASPLKVETD
C1_07540C	BBC1	A0A1D8PE54 [110-123]	A0A1D8PE54 1xPhospho [T/S]	Bbc1p	0.853119	0.158717	-0.368129	-1.06253	7472.67	12347.5	17508.2	18295.9	12389.2	2967.01	9762.99	7379.17
C1_07540C	BBC1	A0A1D8PE54 [695-702]	A0A1D8PE54 2xPhospho [S695; S/T]	Bbc1p	7.84176	-11.2389	11.2389	-7.84176	0	0	228.407	0	1703.23	712.575	0	0							NAPTVRKSLDSTVTR
C1_07540C	BBC1	A0A1D8PE54 [259-276]	A0A1D8PE54 3xPhospho [T261; S273; T/S]	Bbc1p	-8.57853	8.81208	-8.57853	8.81208	381.291	0	0	0	0	0	256.832	191.637			Y		Y		DVPSKIATHGTGDSI	DSIHTPTSPIKNNEL
C1_07590C	C1_07590C	A0A1D8PE70 [556-581]	A0A1D8PE70 1xPhospho [S]	AP-2 complex subunit alpha	0	15.3514	0	15.3514	0	0	0	0	0	0	0	41804.3
C1_07600W	ATP7	Q59PV8 [111-121]	Q59PV8 1xPhospho [S117]	ATP synthase subunit d, mitochondrial	0.613844	-0.326141	0.581451	-0.358534	13.3337	12.4289	19.6894	20.2661	39.0462	0	19.7762	11.1673							KSVLEEISVLQKTLK
C1_07600W	ATP7	Q59PV8 [82-89]	Q59PV8 1xPhospho [S88]	ATP synthase subunit d, mitochondrial	-0.25427	0.174369	-0.308458	0.120181	28.4215	12.6153	14.1466	20.0976	17.6526	15.2923	16.5737	20.7322							KPVTIDVSKNLKNIE
C1_07600W	ATP7	Q59PV8 [93-100]	Q59PV8 1xPhospho [S99]	ATP synthase subunit d, mitochondrial	-0.140484	0.408345	0.249575	0.798405	12.7623	12.2324	8.48108	14.1017	23.8918	6.01223	21.9043	18.1103							KNIEIFESKAIENAK
C1_07780W	C1_07780W	A0A1D8PE56 [680-695]	A0A1D8PE56 1xPhospho [S688]	Uncharacterized protein	0	-20.9893	20.9893	0	0	0	0	0	1.57937e+06	502242	0	0		Y					TAVDGKESPDRALEK
C1_07790C	C1_07790C	Q5A7B3 [65-75]	Q5A7B3 1xPhospho [S68]	Uncharacterized protein	-3.36816	-1.39002	-0.295047	1.68309	1.32155e+07	9.42802e+06	2.19295e+06	0	4.13145e+06	1.43241e+07	4.26042e+06	2.78145e+06	Y						SSLKRRNSNTNNSLK
C1_07790C	C1_07790C	Q5A7B3 [66-75]	Q5A7B3 1xPhospho [T/S]	Uncharacterized protein	-0.385069	-2.50737	0.933702	-1.1886	1.31578e+07	2.219e+07	4.85172e+06	2.22156e+07	4.38877e+07	2.36326e+07	4.79916e+06	7.07606e+06
C1_07810C	C1_07810C	Q5A7B0 [300-308]	Q5A7B0 1xPhospho [S302]	CENP-T_C domain-containing protein	18.6682	-19.4336	19.4336	-18.6682	0	0	239146	177433	524687	183429	0	0	Y						SLISRKTSDETPTKE
C1_07810C	C1_07810C	Q5A7B0 [99-106]	Q5A7B0 1xPhospho [T102]	CENP-T_C domain-containing protein	18.955	-1.26442	19.4585	-0.760928	0	0	305625	202574	381285	339158	143231	156665						Y	PKSRRSVTPNSRMSL
C1_07810C	C1_07810C	Q5A7B0 [107-113]	Q5A7B0 1xPhospho [T110]	CENP-T_C domain-containing protein	1.3942	-0.0234316	0.941725	-0.475906	774132	750474	2.01107e+06	1.99625e+06	0	2.9285e+06	1.69637e+06	1.18496e+06		Y					PNSRMSLTPIRSRRN
C1_07810C	C1_07810C	Q5A7B0 [11-20]	Q5A7B0 1xPhospho [T17]	CENP-T_C domain-containing protein	0.900025	2.22961	1.8772	3.20679	575569	0	0	1.07407e+06	828964	1.28546e+06	0	9.91682e+06		Y			Y		KSLSQPATPPRSSPN
C1_07810C	C1_07810C	Q5A7B0 [643-651]	Q5A7B0 1xPhospho [T646]	CENP-T_C domain-containing protein	21.6918	0	0	-21.6918	0	0	1.54933e+06	1.83811e+06	0	0	0	0			Y				QAHKSLNTNLPSRKK
C1_07810C	C1_07810C	Q5A7B0 [11-39]	Q5A7B0 2xPhospho [T/S]	CENP-T_C domain-containing protein	0.194282	1.74704	-1.60169	-0.0489404	3.20147e+06	3.64287e+06	4.12369e+06	3.7073e+06	1.2782e+06	976943	2.94772e+06	4.62207e+06
C1_07840W	C1_07840W	A0A1D8PE45 [198-205]	A0A1D8PE45 1xPhospho [S198]	Nicotinate-nucleotide pyrophosphorylase [carboxylating] (EC 2.4.2.19) (Quinolinate phosphoribosyltransferase [decarboxylating])	-0.704333	-0.438287	0.590335	0.85638	1000.36	1894.32	825.063	951.095	2876.8	1481.93	1772.52	1444.01							KAVKKAKSVCGFAVK
C1_07870C	SMI1	A0A1D8PE53 [398-414]	A0A1D8PE53 1xPhospho [S/T]	Smi1p	0.357996	-0.567508	0.504372	-0.421132	62049.4	77886.5	91070.2	88278.2	91245.1	107255	68228.1	65715.9
C1_07870C	SMI1	A0A1D8PE53 [218-230]	A0A1D8PE53 1xPhospho [S218]	Smi1p	0	-8.4767	8.4767	0	0	0	0	0	0	355.238	0	0							EGSSNNKSGPINNSF
C1_07870C	SMI1	A0A1D8PE53 [452-474]	A0A1D8PE53 1xPhospho [S458]	Smi1p	-1.40198	0.500079	0.177758	2.07982	948.401	0	358.263	0	567.358	505.533	1156.97	360.823							KNKPPVPSPLANSDN
C1_07870C	SMI1	A0A1D8PE53 [533-542]	A0A1D8PE53 1xPhospho [S538]	Smi1p	-2.08943	-4.78539	1.58105	-1.11491	546.649	4913.37	635.576	646.623	11642.7	4695.02	441.119	150.358							VKADDKESEEIKVTK
C1_07870C	SMI1	A0A1D8PE53 [424-451]	A0A1D8PE53 1xPhospho [T426]	Smi1p	0.750354	-0.603643	2.01252	0.65852	715.01	1095.8	1039.08	2007.75	5120.4	2188.99	2384	2425.89							SNLKKTTTNGNAASP
C1_07870C	SMI1	A0A1D8PE53 [398-414]	A0A1D8PE53 2xPhospho [S/T]	Smi1p	0.435938	-0.64179	0.132496	-0.945233	22250.5	35714	35994.1	42420.1	28548.3	34991.9	17702.5	23021.2
C1_07970C	IRE1	A0A1D8PE76 [641-655]	A0A1D8PE76 1xPhospho [S/T]	Bifunctional endoribonuclease/protein kinase	11.837	-16.7065	16.7065	-11.837	0	0	3657.29	0	89328.3	17618.2	0	0
C1_07970C	IRE1	A0A1D8PE76 [148-153]	A0A1D8PE76 1xPhospho [S151]	Bifunctional endoribonuclease/protein kinase	3.21872	0.813439	3.41664	1.01136	7703.81	0	27844.4	43883.2	65747.1	16528	84057.9	60532.9							GLNKLPTSIKDLVME
C1_07970C	IRE1	A0A1D8PE76 [746-757]	A0A1D8PE76 1xPhospho [S751]	Bifunctional endoribonuclease/protein kinase	-1.02271	0.877758	-1.17093	0.729533	10112.9	4540.03	7211.55	0	0	6507.32	11958.1	0							TKSLIPPSSLPAIKS
C1_07990C	C1_07990C	A0A1D8PE74 [378-390]	A0A1D8PE74 1xPhospho [S]	Uncharacterized protein	0.226245	1.11837	-1.67778	-0.785654	5.87932e+06	7.27062e+06	6.15494e+06	9.22768e+06	4.11018e+06	0	3.97966e+06	4.94362e+06
C1_07990C	C1_07990C	A0A1D8PE74 [204-214]	A0A1D8PE74 1xPhospho [S205]	Uncharacterized protein	0.735263	-1.67645	1.60248	-0.80924	1.21207e+06	1.10545e+06	1.95645e+06	1.90152e+06	2.92078e+06	4.1167e+06	2.20168e+06	0							TTNNSKSSPSSSSSI
C1_07990C	C1_07990C	A0A1D8PE74 [240-248]	A0A1D8PE74 1xPhospho [S242]	Uncharacterized protein	0.185058	-21.8001	1.77618	-20.2089	747677	318404	549225	662764	2.52693e+06	1.12458e+06	0	0						Y	DTRSRSSSIGNNMKK
C1_07990C	C1_07990C	A0A1D8PE74 [378-389]	A0A1D8PE74 1xPhospho [S380]	Uncharacterized protein	0.891972	-0.160169	-0.717316	-1.76946	7.36365e+06	7.09286e+06	1.22537e+07	1.45734e+07	3.89696e+06	4.8959e+06	3.47314e+06	4.39577e+06						Y	QQQQRSLSPTSSSDG
C1_07990C	C1_07990C	A0A1D8PE74 [283-302]	A0A1D8PE74 1xPhospho [T/S]	Uncharacterized protein	0.306735	1.46998	-1.28336	-0.120117	1.27915e+07	1.94643e+07	1.87339e+07	2.11636e+07	7.84924e+06	5.40269e+06	2.33997e+07	1.33104e+07
C1_08070W	CDR4	A0A1D8PE84 [65-75]	A0A1D8PE84 1xPhospho [S65]	Cdr4p	2.79069	-21.7553	3.63098	-20.915	285742	0	1.13786e+06	839367	2.08326e+06	1.4568e+06	0	0			Y				SRQESQKSNEQESEL
C1_08070W	CDR4	A0A1D8PE84 [811-822]	A0A1D8PE84 1xPhospho [S817]	Cdr4p	2.27183	-1.47858	2.63709	-1.11332	1.63038e+06	0	3.91741e+06	3.95626e+06	4.46728e+06	5.67487e+06	2.15381e+06	1.48563e+06							KANNDIESGEIEKVT
C1_08090C	FUN12	Q5A782 [123-156]	Q5A782 1xPhospho [T/S]	Translation initiation factor eIF5B	-0.626627	-1.2324	1.42061	0.814835	1539.82	1125.94	445.344	1280.89	3752.11	3385.75	1403.11	1634.26
C1_08090C	FUN12	Q5A782 [908-916]	Q5A782 1xPhospho [T910]	Translation initiation factor eIF5B	2.4428	-0.294199	2.47687	-0.260132	22.4189	0	26.1895	100.139	66.7003	62.6702	44.616	60.7044							EGAVRVGTPICAVRT
C1_08090C	FUN12	Q5A782 [123-156]	Q5A782 2xPhospho [S/T]	Translation initiation factor eIF5B	-2.46928	-1.16248	2.66367	3.97048	173.964	126.976	53.5245	0	989.367	922.858	424.055	429.669
C1_08110W	C1_08110W	A0A1D8PEA9 [1079-1088]	A0A1D8PEA9 1xPhospho [S1081]	TOG domain-containing protein	-4.91335	-1.236	-1.5399	2.13745	953.272	826.501	35.2563	22.8376	391.607	219.816	153.411	105.592							ALLQKNPSDLDVVQK
C1_08110W	C1_08110W	A0A1D8PEA9 [638-654]	A0A1D8PEA9 1xPhospho [S643]	TOG domain-containing protein	-9.16061	-2.38374	-1.71525	5.06162	0	571.292	0	0	106.495	66.7967	0	32.3964							AKASQDISLLEEEDA
C1_08110W	C1_08110W	A0A1D8PEA9 [655-667]	A0A1D8PEA9 1xPhospho [S665]	TOG domain-containing protein	0	6.28913	0	6.28913	0	0	0	0	0	0	38.2514	38.9502							EWDVINISGKWIGVH
C1_08120W	BUD6	A0A1D8PE85 [155-185]	A0A1D8PE85 1xPhospho [T/S]	Bud6p	1.55628	-0.0303199	-6.44534	-8.03195	2.71098e+06	2.6497e+06	1.00435e+07	5.722e+06	38111.2	23402.3	35067.4	25166.9
C1_08180C	C1_08180C	A0A1D8PE79 [642-653]	A0A1D8PE79 1xPhospho [S]	Oxysterol-binding protein related protein	-0.419591	-1.5158	1.6176	0.521395	903.831	323.081	917.031	0	3767.02	0	683.06	633.629
C1_08180C	C1_08180C	A0A1D8PE79 [421-439]	A0A1D8PE79 1xPhospho [S]	Oxysterol-binding protein related protein	0.171908	-0.260067	1.26418	0.832207	397.45	766.965	796.606	515.289	1308.76	1489.46	1165.62	1170.87
C1_08180C	C1_08180C	A0A1D8PE79 [1172-1181]	A0A1D8PE79 1xPhospho [S1173]	Oxysterol-binding protein related protein	-1.26293	-0.472706	-0.130352	0.659873	591.742	704.427	232.779	306.747	657.131	526.974	466.049	386.952	Y						QSGNRKMSLLDDPNA
C1_08180C	C1_08180C	A0A1D8PE79 [1171-1181]	A0A1D8PE79 1xPhospho [S1173]	Oxysterol-binding protein related protein	-1.1587	0.111385	-1.98186	-0.711775	228.457	1035.96	184.145	381.654	180.965	138.391	283.21	61.8597	Y						QSGNRKMSLLDDPNA
C1_08180C	C1_08180C	A0A1D8PE79 [807-818]	A0A1D8PE79 1xPhospho [S808]	Oxysterol-binding protein related protein	-0.830681	-1.08375	1.60469	1.35163	446.467	754.646	383.326	291.578	2004.92	1650.08	765.402	958.505							LNLDEKSSIAPPTVI
C1_08180C	C1_08180C	A0A1D8PE79 [838-857]	A0A1D8PE79 1xPhospho [S849]	Oxysterol-binding protein related protein	-0.294288	-8.4442	1.35723	-6.79269	134.954	0	0	109.867	199.46	147.844	0	0							NNVEEGVSPLTVEES
C1_08180C	C1_08180C	A0A1D8PE79 [28-39]	A0A1D8PE79 1xPhospho [T36]	Oxysterol-binding protein related protein	3.59596	1.78519	1.68223	-0.128535	53.2472	0	241.953	412.993	173.092	0	50.1962	548.837							DTIVDELTSCKPTLQ
C1_08180C	C1_08180C	A0A1D8PE79 [377-405]	A0A1D8PE79 2xPhospho [S381; S/T]	Oxysterol-binding protein related protein	0	-8.05134	8.05134	0	0	0	0	0	183.826	80.449	0	0			Y				GERRSTPSPATIESA
C1_08180C	C1_08180C	A0A1D8PE79 [421-439]	A0A1D8PE79 2xPhospho [S426; T/S]	Oxysterol-binding protein related protein	-0.859679	5.02779	-0.669266	5.2182	169.527	0	92.9731	0	0	106.232	1855.65	1641.51							KRISSSSSFESGDES
C1_08180C	C1_08180C	A0A1D8PE79 [420-439]	A0A1D8PE79 2xPhospho [S426; T/S]	Oxysterol-binding protein related protein	0.144003	-1.04281	1.39216	0.20535	157.558	492.757	80.9191	637.763	948.978	759.538	0	828.769							KRISSSSSFESGDES
C1_08180C	C1_08180C	A0A1D8PE79 [420-439]	A0A1D8PE79 3xPhospho [S426; S429; S]	Oxysterol-binding protein related protein	-6.59925	-0.645531	1.70644	7.66016	95.9556	0	0	0	201.31	114.108	95.2964	105.976			Y				KRISSSSSFESGDES	SSSSSFESGDESTGE
C1_08180C	C1_08180C	A0A1D8PE79 [421-439]	A0A1D8PE79 3xPhospho [S426; S429; S433]	Oxysterol-binding protein related protein	0	-8.78978	8.78978	0	0	0	0	0	223.89	217.686	0	0			Y				KRISSSSSFESGDES	SSSSSFESGDESTGE	SFESGDESTGELSRS
C1_08210C	MLT1	Q5A762 [669-688]	Q5A762 1xPhospho [S/T]	Multiple drug resistance-associated protein-like transporter 1 (MRP-like transporter 1) (Vacuolar multi-drug resistance ABC transporter MTL1)	-5.06777	-2.11664	4.89921	7.85034	32.5389	0	0	0	303.25	696.576	72.0374	157.737
C1_08220W	CCR4	Q5A761 [249-266]	Q5A761 1xPhospho [T255]	Glucose-repressible alcohol dehydrogenase transcriptional effector (EC 3.1.13.4) (Carbon catabolite repressor protein 4) (Cytoplasmic deadenylase)	0.527418	-2.9343	2.34362	-1.1181	2814.14	0	1296.73	2759.86	8960.67	5327.26	1868.34	0							KPINYQGTPTTSAAL
C1_08220W	CCR4	Q5A761 [326-335]	Q5A761 2xPhospho [S328; S331]	Glucose-repressible alcohol dehydrogenase transcriptional effector (EC 3.1.13.4) (Carbon catabolite repressor protein 4) (Cytoplasmic deadenylase)	0.565706	1.1438	-1.05466	-0.476572	3619.04	7092.61	3759.03	12095.9	4256.43	899.739	3447.79	7946.6							LSNNKLNSIPSSISK	NKLNSIPSSISKLRN
C1_08270C	MED15	A0A1D8PEC5 [941-953]	A0A1D8PEC5 1xPhospho [S/T]	Med15p	2.22596	-0.0250642	3.2733	1.02227	4455.25	5528.1	21633	25075	52164.8	44368.3	39168.4	55702.1
C1_08270C	MED15	A0A1D8PEC5 [1038-1047]	A0A1D8PEC5 1xPhospho [S/T]	Med15p	3.07365	-0.122367	3.57864	0.382622	16521.6	16009.4	107307	166579	242300	146376	165294	191775
C1_08270C	MED15	A0A1D8PEC5 [548-582]	A0A1D8PEC5 1xPhospho [S]	Med15p	10.6002	-0.298101	13.0995	2.20116	0	0	840.342	710.963	6102.05	2673.63	3288.04	3849.23
C1_08270C	MED15	A0A1D8PEC5 [1038-1047]	A0A1D8PEC5 2xPhospho [T1041; S1045]	Med15p	2.45958	0.0236482	3.19569	0.759754	7815.46	5941.58	28653.3	47022.8	70111.8	55940.5	57117.1	71018.5			Y		Y		SNGKPAATSPLSPKT	PAATSPLSPKTGGEW
C1_08270C	MED15	A0A1D8PEC5 [941-953]	A0A1D8PEC5 2xPhospho [T942; S]	Med15p	3.36559	1.57687	2.15482	0.366104	5587.29	10613.5	49629.8	117365	55297.8	16850.1	109639	105595							QTQSNKNTPSAQSPA
C1_08300W	NOT5	A0A1D8PE87 [431-442]	A0A1D8PE87 1xPhospho [S]	CCR4-NOT core subunit	0.106537	0.00517559	-0.379873	-0.481234	22480.4	25996.8	21844.4	30348.2	28028	9226.8	16968.3	20420.4
C1_08300W	NOT5	A0A1D8PE87 [391-413]	A0A1D8PE87 1xPhospho [S]	CCR4-NOT core subunit	0.548614	-0.256834	1.59674	0.791288	1667.85	5598.25	3494.26	7134.17	16737.1	5241.86	8391.3	10003.2
C1_08300W	NOT5	A0A1D8PE87 [454-464]	A0A1D8PE87 1xPhospho [S456]	CCR4-NOT core subunit	-1.09899	-2.96928	0.825987	-1.0443	247.051	206.712	112.23	99.0736	674.754	130.427	43.7405	58.2012						Y	LQISRSQSPMVSNEN
C1_08300W	NOT5	A0A1D8PE87 [454-464]	A0A1D8PE87 1xPhospho [S456]	CCR4-NOT core subunit	-0.557216	-1.04616	0.380003	-0.108938	3085.84	1390.46	1570.98	1470.85	4298.09	1527.42	1029.19	1791.33						Y	LQISRSQSPMVSNEN
C1_08300W	NOT5	A0A1D8PE87 [280-306]	A0A1D8PE87 1xPhospho [T299]	CCR4-NOT core subunit	0.552716	0.377054	0.391616	0.215954	1601.58	1194.78	2076.7	2025.59	2202.84	1465.91	2369.47	2395.39							QNNIGNNTPPATQIK
C1_08300W	NOT5	A0A1D8PE87 [307-334]	A0A1D8PE87 1xPhospho [T331]	CCR4-NOT core subunit	0.432849	0.644072	0.0512341	0.262457	744.742	314.421	692.302	737.809	628.591	468.898	708.563	1007.08		Y	Y				SSASSTSTPVKKLKP
C1_08300W	NOT5	A0A1D8PE87 [391-413]	A0A1D8PE87 2xPhospho [S/T]	CCR4-NOT core subunit	-6.7646	-8.68029	1.9157	0	107.729	0	0	0	317.471	91.7594	0	0
C1_08300W	NOT5	A0A1D8PE87 [388-413]	A0A1D8PE87 2xPhospho [S/T]	CCR4-NOT core subunit	-0.638563	0.62159	-0.932456	0.327697	4976.43	7780.36	2908.32	5285.68	5211.92	1471.72	3872.79	6411
C1_08300W	NOT5	A0A1D8PE87 [431-442]	A0A1D8PE87 2xPhospho [S434; S435]	CCR4-NOT core subunit	0.0244952	-1.22809	1.2023	-0.050286	327.139	232.34	334.309	234.768	959.146	329.549	123.025	426.524			Y				STLRSESSSPLVGHA	TLRSESSSPLVGHAK
C1_08310W	OPY2	Q5A753 [413-433]	Q5A753 1xPhospho [S]	Opy2p	-0.512061	-3.93629	4.23675	0.812523	612582	557241	458105	362198	2.1657e+07	398171	471253	969429
C1_08310W	OPY2	Q5A753 [394-412]	Q5A753 1xPhospho [S404]	Opy2p	1.05398	-21.8988	6.88606	-16.0667	33058.1	0	46738.6	21899.4	3.84123e+06	68992.7	0	0							EDEDEEDSEEDYDEG
C1_08310W	OPY2	Q5A753 [519-527]	Q5A753 1xPhospho [S520]	Opy2p	-0.27043	-9.61749	7.54316	-1.8039	28375.3	0	16691.1	6833.86	5.23175e+06	60906.9	6736.84	0							DNSNDRGSPFADPDK
C1_08310W	OPY2	Q5A753 [413-433]	Q5A753 2xPhospho [S/T]	Opy2p	0.686815	-5.07703	5.96538	0.201531	52036.7	18648.6	62575.8	51208.8	4.36929e+06	47346.6	27206.9	103636
C1_08320W	TKL1	Q5A750 [255-271]	Q5A750 1xPhospho [S]	Transketolase (EC 2.2.1.1)	0	-5.48715	5.48715	0	0	0	0	0	43.8534	0	0	0
C1_08320W	TKL1	Q5A750 [370-387]	Q5A750 1xPhospho [S377]	Transketolase (EC 2.2.1.1)	0	1.56599	3.31301	4.879	0	0	0	0	8.93838	0	11.2353	17.1902							IPEFIGGSADLTGSN
C1_08320W	TKL1	Q5A750 [668-675]	Q5A750 1xPhospho [S671]	Transketolase (EC 2.2.1.1)	0.991202	-0.7454	0.223849	-1.51275	82.5894	96.3509	131.6	225.093	94.5915	114.551	63.7786	60.5719							YEGKQLLSPLDRAFX
C1_08330C	ADH2	O94038 [277-287]	O94038 1xPhospho [T279]	Alcohol dehydrogenase 2 (EC 1.1.1.1)	0	-6.40747	6.40747	0	0	0	0	0	52.9046	30.9825	0	0							PAGAKISTPVFDAVI
C1_08340C	SNX3	Q5A748 [4-17]	Q5A748 1xPhospho [S15]	Sorting nexin-3	0.453187	0.424842	0.205891	0.177546	302694	195016	309749	371647	313182	260876	413618	357012							ISDVINTSPKNKSQS
C1_08380W	TEF2	Q59QD6 [21-30]	Q59QD6 1xPhospho [S/T]	Elongation factor 1-alpha 2 (EF-1-alpha 2)	-2.21017	-0.574071	0.350385	1.98648	3.99851	2.8059	0.686608	0	6.68945	2.2604	3.75962	1.92389
C1_08380W	TEF2	Q59QD6 [394-401]	Q59QD6 1xPhospho [S394]	Elongation factor 1-alpha 2 (EF-1-alpha 2)	0.625844	-0.549051	0.474963	-0.699933	0	0.87005	0.254311	1.63139	1.26056	0.33859	0	0.776439							ENPKFVKSGDAAIVK
C1_08380W	TEF2	Q59QD6 [254-264]	Q59QD6 1xPhospho [T259]	Elongation factor 1-alpha 2 (EF-1-alpha 2)	-0.847745	-1.55397	1.02189	0.315667	1.60618	0	0.448132	0	2.6472	1.64487	0.802327	0							YKIGGIGTVPVGRVE
C1_08380W	TEF2	Q59QD6 [254-271]	Q59QD6 1xPhospho [T267]	Elongation factor 1-alpha 2 (EF-1-alpha 2)	0	-1.26887	2.03202	0.763152	0	0	0	0	2.15111	0.938663	0.697195	0							VPVGRVETGIIKAGM
C1_08380W	TEF2	Q59QD6 [272-288]	Q59QD6 1xPhospho [T285]	Elongation factor 1-alpha 2 (EF-1-alpha 2)	-1.90798	-0.515262	-0.377215	1.0155	1.20692	1.54591	0	0	0.665329	1.22406	1.02161	0							FAPAGVTTEVKSVEM
C1_08380W	TEF2	Q59QD6 [370-376]	Q59QD6 1xPhospho [T372]	Elongation factor 1-alpha 2 (EF-1-alpha 2)	-1.09392	-1.08906	0.651064	0.655918	4.01034	2.34006	1.25441	1.18917	7.07114	3.47138	2.51085	1.9149							HIACKFDTLVEKIDR
C1_08390C	C1_08390C	A0A1D8PEB3 [1-9]	A0A1D8PEB3 1xAcetyl [N-Term]; 1xPhospho [S8]	Uncharacterized protein	-0.453059	-1.0915	0.818218	0.179777	4.44064e+06	4.3419e+06	1.99119e+06	4.42439e+06	9.93034e+06	5.55527e+06	2.85398e+06	4.41301e+06							MDWYNNRSRRSSITT
C1_08390C	C1_08390C	A0A1D8PEB3 [59-86]	A0A1D8PEB3 1xPhospho [S74]	Uncharacterized protein	-0.227666	-1.82027	2.6897	1.0971	3886278	0	2.23625e+06	1.08269e+06	1.45937e+07	1.04797e+07	4.2213e+06	2.87873e+06							QQHGNIPSPLNLSSQ
C1_08390C	C1_08390C	A0A1D8PEB3 [87-108]	A0A1D8PEB3 3xPhospho [S89; S92; S96]	Uncharacterized protein	-1.33899	-3.81179	0.64287	-1.82993	0	1.69535e+06	394115	276052	1.48671e+06	1.16047e+06	188503	0			Y				QTMGRNLSPVSQTNS	GRNLSPVSQTNSPIV	SPVSQTNSPIVTIPP
C1_08440C	C1_08440C	A0A1D8PEB5 [25-38]	A0A1D8PEB5 1xPhospho [S32]	Uncharacterized protein	0.0809101	0.416188	-1.2579	-0.922622	3.76926e+06	6.19954e+06	3.94231e+06	6.60154e+06	2.18391e+06	1.98457e+06	2.64235e+06	2.92006e+06							GMPLQETSPNIINKS
C1_08440C	C1_08440C	A0A1D8PEB5 [55-64]	A0A1D8PEB5 1xPhospho [S58]	Uncharacterized protein	0.956093	-2.02286	0.257743	-2.72121	1.91029e+07	1.27156e+07	3.05652e+07	3.11644e+07	1.50887e+07	2.29538e+07	736241	8.62487e+06							SKKRLAGSPVSLQRE
C1_08500C	ENO1	P30575 [203-221]	P30575 1xPhospho [S/Y]	Enolase 1 (EC 4.2.1.11) (2-phospho-D-glycerate hydro-lyase) (2-phosphoglycerate dehydratase)	-0.803181	-0.80397	0.316017	0.315227	9.99369	7.81248	4.33626	5.44125	12.6879	9.72367	6.29017	6.1193
C1_08500C	ENO1	P30575 [419-432]	P30575 1xPhospho [S425]	Enolase 1 (EC 4.2.1.11) (2-phospho-D-glycerate hydro-lyase) (2-phosphoglycerate dehydratase)	0.261707	-1.6901	1.28012	-0.671683	3.5938	4.62141	5.00524	5.04284	15.3905	5.98958	5.9357	0							RIEEELGSEAIYAGK
C1_08510W	EAF6	Q59QC2 [16-28]	Q59QC2 1xPhospho [S/T]	Chromatin modification-related protein EAF6	1.84194	-4.00076	5.07956	-0.763133	20516.6	11458.8	64411	50220.5	949093	132167	30027.6	37514.6
C1_08510W	EAF6	Q59QC2 [16-29]	Q59QC2 1xPhospho [T/S]	Chromatin modification-related protein EAF6	1.54858	-2.30015	4.15727	0.308534	7029.27	23359.6	28469.1	60429.4	506031	36208.7	38107.9	71988.6
C1_08510W	EAF6	Q59QC2 [190-203]	Q59QC2 1xPhospho [T/S]	Chromatin modification-related protein EAF6	1.68935	-4.68932	5.80255	-0.576113	11776	20198.6	42467	60657.1	1.65464e+06	130052	25118.4	44053.7
C1_08510W	EAF6	Q59QC2 [16-29]	Q59QC2 2xPhospho [T26; S/T]	Chromatin modification-related protein EAF6	-0.304765	-17.3973	6.4785	-10.614	986.735	948.153	0	1566.24	165037	7586.33	0	0		Y					ISSSGTATPKKTSSV
C1_08540C	C1_08540C	Q59QB9 [96-150]	Q59QB9 1xPhospho [S/Y/T]	Non-specific serine/threonine protein kinase (EC 2.7.11.1)	0.515131	0.863623	-0.101392	0.2471	188.041	413.294	299.87	559.94	560.456	0	446.484	574.141
C1_08540C	C1_08540C	Q59QB9 [18-51]	Q59QB9 1xPhospho [S]	Non-specific serine/threonine protein kinase (EC 2.7.11.1)	2.41927	0.817275	1.02822	-0.573774	2363.51	2807.15	8740.84	18921.4	6011.71	4534.93	7767.61	10817.1
C1_08540C	C1_08540C	Q59QB9 [18-57]	Q59QB9 1xPhospho [S53]	Non-specific serine/threonine protein kinase (EC 2.7.11.1)	2.48646	1.72954	2.02201	1.26509	0	199.59	0	1123.11	363.595	450.098	1541.53	1159.17							SSTSVKDSPTPRQST
C1_08540C	C1_08540C	Q59QB9 [78-88]	Q59QB9 1xPhospho [S85]	Non-specific serine/threonine protein kinase (EC 2.7.11.1)	2.40314	-0.723067	2.21037	-0.915835	0	145.011	278.246	493.084	422.117	252.614	146.928	261.435		Y					LTVAADRSPEKSLGS
C1_08540C	C1_08540C	Q59QB9 [18-51]	Q59QB9 2xPhospho [S/T]	Non-specific serine/threonine protein kinase (EC 2.7.11.1)	1.7791	1.15813	-0.849541	-1.47052	530.014	783.673	1009.86	3501.31	256.158	472.442	407.508	1219.72
C1_08540C	C1_08540C	Q59QB9 [18-57]	Q59QB9 2xPhospho [T/S]	Non-specific serine/threonine protein kinase (EC 2.7.11.1)	11.103	10.5402	0	-0.562779	0	0	732.033	1466.47	0	0	171.667	1316.39
C1_08600C	GCD6	P87163 [516-530]	P87163 1xPhospho [S520]	Translation initiation factor eIF-2B subunit epsilon (GCD complex subunit GCD6) (Guanine nucleotide exchange factor subunit GCD6) (eIF-2B GDP-GTP exchange factor subunit epsilon)	0.206781	0.617159	-0.307958	0.102419	28619	27242.8	19043.4	45427.5	29314.2	15809.9	42009.4	27204.9							QMKSLNVSDDSIASV
C1_08600C	GCD6	P87163 [516-531]	P87163 2xPhospho [S520; S523]	Translation initiation factor eIF-2B subunit epsilon (GCD complex subunit GCD6) (Guanine nucleotide exchange factor subunit GCD6) (eIF-2B GDP-GTP exchange factor subunit epsilon)	-11.9657	-0.0702738	1.892	13.7874	0	3998.68	0	0	14609.6	234.188	8176.03	5961.96							QMKSLNVSDDSIASV	SLNVSDDSIASVSNK
C1_08600C	GCD6	P87163 [516-530]	P87163 2xPhospho [S520; S523]	Translation initiation factor eIF-2B subunit epsilon (GCD complex subunit GCD6) (Guanine nucleotide exchange factor subunit GCD6) (eIF-2B GDP-GTP exchange factor subunit epsilon)	-0.105269	-0.426582	1.50274	1.18143	1066.58	735.571	565.983	1109.28	4016.64	1092.12	1058.56	2742.22							QMKSLNVSDDSIASV	SLNVSDDSIASVSNK
C1_08600C	GCD6	P87163 [516-530]	P87163 3xPhospho [S520; S523; S526]	Translation initiation factor eIF-2B subunit epsilon (GCD complex subunit GCD6) (Guanine nucleotide exchange factor subunit GCD6) (eIF-2B GDP-GTP exchange factor subunit epsilon)	0	-10.3674	10.3674	0	0	0	0	0	1319.99	0	0	0			Y				QMKSLNVSDDSIASV	SLNVSDDSIASVSNK	VSDDSIASVSNKKVK
C1_08600C	GCD6	P87163 [516-531]	P87163 3xPhospho [S520; S523; S526]	Translation initiation factor eIF-2B subunit epsilon (GCD complex subunit GCD6) (Guanine nucleotide exchange factor subunit GCD6) (eIF-2B GDP-GTP exchange factor subunit epsilon)	1.53217	-0.917949	3.20959	0.759472	811.41	0	901.757	1446.9	5948.29	1566.22	2052.82	1923.84			Y				QMKSLNVSDDSIASV	SLNVSDDSIASVSNK	VSDDSIASVSNKKVK
C1_08640W	RTG1	Q5APP3 [100-115]	Q5APP3 1xPhospho [S104]	Rtg1p	-1.03782	-1.95802	0.791435	-0.128772	12458.1	11345.3	6805.55	4787.75	37566.5	3633.19	7396.69	3206.57							YIKSHEGSDNEDEDD
C1_08640W	RTG1	Q5APP3 [160-169]	Q5APP3 1xPhospho [S162]	Rtg1p	-1.1247	-1.66538	1.29756	0.756873	88496.1	147762	55610.4	52736	528958	51793.4	103370	79716.8							TKVVKENSPEDDAVK
C1_08670W	SWI6	A0A1D8PED2 [195-212]	A0A1D8PED2 1xPhospho [S]	Transcriptional regulator	-2.38208	-1.85938	1.23999	1.7627	449.954	806.64	0	240.247	2031.03	938.375	304.048	513.58
C1_08670W	SWI6	A0A1D8PED2 [194-212]	A0A1D8PED2 1xPhospho [S]	Transcriptional regulator	-2.09516	0.201581	0.068787	2.36553	1045.44	648.38	395.66	0	802.525	974.065	1136.45	906.702
C1_08670W	SWI6	A0A1D8PED2 [513-520]	A0A1D8PED2 1xPhospho [S518]	Transcriptional regulator	-0.151554	-1.25721	0.538935	-0.566718	61567.1	55571.9	46520.4	58937.4	79339.2	90852.4	34705.1	36494.5							EKLPEVESPKVVTTP
C1_08670W	SWI6	A0A1D8PED2 [194-212]	A0A1D8PED2 2xPhospho [S209; S/Y]	Transcriptional regulator	-1.50127	-0.539102	0.415391	1.37756	482.48	381.506	0	304.549	820.754	331.843	449.257	343.647		Y					SDSDILDSPSKKQKL
C1_08670W	SWI6	A0A1D8PED2 [195-212]	A0A1D8PED2 2xPhospho [S209; S/Y]	Transcriptional regulator	0	-0.528904	9.62589	9.09698	0	0	0	0	315.902	473.197	269.118	277.484		Y					SDSDILDSPSKKQKL
C1_08700W	C1_08700W	A0A1D8PEE1 [523-542]	A0A1D8PEE1 1xPhospho [S/T]	ANK_REP_REGION domain-containing protein	0.708491	1.56716	1.17282	2.03149	46169.9	30693	70805.3	54796.5	129502	43788.3	256600	256896
C1_08700W	C1_08700W	A0A1D8PEE1 [954-970]	A0A1D8PEE1 1xPhospho [S]	ANK_REP_REGION domain-containing protein	1.1723	-0.575874	1.33347	-0.414696	308040	320421	767700	648662	1.29376e+06	290019	512603	549920
C1_08700W	C1_08700W	A0A1D8PEE1 [253-262]	A0A1D8PEE1 1xPhospho [S]	ANK_REP_REGION domain-containing protein	1.58557	-2.03571	1.37961	-2.24168	21024.9	21861.6	52824.8	75891.1	95935	15656.4	24090.3	3124.62
C1_08700W	C1_08700W	A0A1D8PEE1 [210-215]	A0A1D8PEE1 1xPhospho [S211]	ANK_REP_REGION domain-containing protein	0.620337	-1.23935	1.98568	0.125996	7257.76	4331.56	10918.2	6897.85	44007.6	1894.91	12265.6	7176.47			Y				DQRSSKFSPQGRSTT
C1_08700W	C1_08700W	A0A1D8PEE1 [207-215]	A0A1D8PEE1 1xPhospho [S211]	ANK_REP_REGION domain-containing protein	3.04616	0.672374	2.37847	0.00469113	1029.4	0	3948.05	4562.1	0	5356.91	5079.86	3458.01			Y				DQRSSKFSPQGRSTT
C1_08700W	C1_08700W	A0A1D8PEE1 [252-262]	A0A1D8PEE1 1xPhospho [S254]	ANK_REP_REGION domain-containing protein	0.67436	-0.76592	0.452377	-0.987903	1788.07	12768.2	6684.33	16546.5	19917.7	0	5843.39	5869.34	Y						LNDSRKSSISDISSQ
C1_08700W	C1_08700W	A0A1D8PEE1 [336-343]	A0A1D8PEE1 1xPhospho [S337]	ANK_REP_REGION domain-containing protein	2.51547	-1.7539	4.10276	-0.166613	747.505	0	1489.21	2789.64	10536.4	2322.86	0	3812.05	Y						PTITKKTSFTDYLKS
C1_08700W	C1_08700W	A0A1D8PEE1 [938-945]	A0A1D8PEE1 1xPhospho [S940]	ANK_REP_REGION domain-containing protein	0.252204	-1.38752	3.49026	1.85054	14193.4	13899.5	14020.5	19438.9	286188	29518.4	59669.3	60999.8							KSGTKILSGIPSRVV
C1_08700W	C1_08700W	A0A1D8PEE1 [950-970]	A0A1D8PEE1 1xPhospho [S961]	ANK_REP_REGION domain-containing protein	1.75439	1.77686	2.03054	2.053	4665.57	0	4877.27	10866	16684.5	2380.13	25742.1	39590.9							APSVPVSSDEDDVVE
C1_08700W	C1_08700W	A0A1D8PEE1 [950-970]	A0A1D8PEE1 2xPhospho [S/T]	ANK_REP_REGION domain-containing protein	-0.084661	1.05451	1.47253	2.6117	11580.9	3696.98	6105.43	8301.64	34503.3	7895.86	43206.5	44858.3
C1_08700W	C1_08700W	A0A1D8PEE1 [954-970]	A0A1D8PEE1 2xPhospho [S960; S961]	ANK_REP_REGION domain-containing protein	0.330602	0.462026	2.1765	2.30793	47754.2	41193.9	62266	49589.9	311965	90133.5	292158	261723							RAPSVPVSSDEDDVV	APSVPVSSDEDDVVE
C1_08700W	C1_08700W	A0A1D8PEE1 [984-991]	A0A1D8PEE1 2xPhospho [S985; T990]	ANK_REP_REGION domain-containing protein	0.90187	-2.80012	4.21924	0.517253	1639.3	1339.76	3801.13	1766.07	43747.2	11758.1	4741.54	3226.82							NKSAEKKSEDKITKT	KKSEDKITKTVNEHV
C1_08700W	C1_08700W	A0A1D8PEE1 [950-970]	A0A1D8PEE1 3xPhospho [S956; S960; S961]	ANK_REP_REGION domain-containing protein	-11.6864	-0.451783	3.6444	14.879	0	3294.83	0	0	31270.3	9942.28	15920.1	14211.7							RATSRAPSVPVSSDE	RAPSVPVSSDEDDVV	APSVPVSSDEDDVVE
C1_08700W	C1_08700W	A0A1D8PEE1 [954-970]	A0A1D8PEE1 3xPhospho [S956; S960; S961]	ANK_REP_REGION domain-containing protein	-1.20055	-0.416785	2.64499	3.42876	12653.2	13358	4543.12	6773.98	139022	23681.8	71534.1	50345.4							RATSRAPSVPVSSDE	RAPSVPVSSDEDDVV	APSVPVSSDEDDVVE
C1_08700W	C1_08700W	A0A1D8PEE1 [950-970]	A0A1D8PEE1 4xPhospho [S952; S956; S960; S961]	ANK_REP_REGION domain-containing protein	0	-2.836	14.8835	12.0475	0	0	0	0	27317.5	2907.04	0	4232.03							RVVSRATSRAPSVPV	RATSRAPSVPVSSDE	RAPSVPVSSDEDDVV	APSVPVSSDEDDVVE
C1_08710W	C1_08710W	A0A1D8PEE0 [9-29]	A0A1D8PEE0 1xPhospho [S/Y/T]	Uncharacterized protein	0.568342	0.553628	-0.0952258	-0.10994	3.05426e+07	4.16903e+07	4.34731e+07	6.36352e+07	3.51096e+07	3.25095e+07	3.99483e+07	5.93011e+07
C1_08740C	SEC24	Q5AQ76 [683-702]	Q5AQ76 1xPhospho [S693]	Protein transport protein SEC24	0	-1.65352	8.81516	7.16164	0	0	0	0	295.292	154.139	0	142.175			Y				AGNVSGASPLQISTN
C1_08740C	SEC24	Q5AQ76 [728-744]	Q5AQ76 1xPhospho [S737]	Protein transport protein SEC24	-6.35776	6.5317	-6.35776	6.5317	81.0119	0	0	0	0	0	0	91.5203							ALNNLGSSPIPQLIK
C1_08790W	TPO3	A0A1D8PEG8 [42-51]	A0A1D8PEG8 1xPhospho [T/S]	Spermine transporter	-7.87286	1.1323	-0.0843918	8.92077	1.47269e+06	3.37981e+06	12065.3	8635	4.57239e+06	4406.58	33214.3	9.9995e+06
C1_08790W	TPO3	A0A1D8PEG8 [106-114]	A0A1D8PEG8 1xPhospho [T108]	Spermine transporter	-8.08397	0.21861	0.429678	8.73226	0	2.41968e+06	5241.67	3674.8	3.2496e+06	9552.83	34364.7	3.75802e+06							QSIGRVKTIQEEEKL
C1_08900W	C1_08900W	A0A1D8PEG9 [11-19]	A0A1D8PEG9 1xPhospho [S13]	Uncharacterized protein	-18.3325	-15.3046	-3.02789	0	330088	0	0	0	20220.6	20249.6	0	0	Y						TGDNRKQSLSDDVRE
C1_08900W	C1_08900W	A0A1D8PEG9 [12-19]	A0A1D8PEG9 1xPhospho [S13]	Uncharacterized protein	1.13828	-3.16221	-5.1892	-9.48969	18749434	4.10059e+06	3.41947e+07	1.61024e+07	281900	344399	47236.8	22724.2	Y						TGDNRKQSLSDDVRE
C1_08900W	C1_08900W	A0A1D8PEG9 [20-32]	A0A1D8PEG9 1xPhospho [S24]	Uncharacterized protein	0	-2.73838	14.2848	11.5464	0	0	0	0	11152.7	8806.21	0	2990.04							DVREGSSSISTNVAD
C1_08900W	C1_08900W	A0A1D8PEG9 [533-558]	A0A1D8PEG9 1xPhospho [S557]	Uncharacterized protein	-18.6966	-4.01289	-2.83375	11.8499	0	424841	0	0	32718.5	26871.8	3690.32	0							NNNTNVNSDXXXXXX
C1_08950W	PFK26	A0A1D8PEF9 [377-392]	A0A1D8PEF9 1xPhospho [S385]	Pfk26p	-1.23981	-4.37141	4.37719	1.24559	838.415	565.542	593.897	0	24512.7	4682.73	1409.6	0							TTTNKEGSPDAESLK
C1_08950W	PFK26	A0A1D8PEF9 [383-392]	A0A1D8PEF9 1xPhospho [S385]	Pfk26p	0.27932	-4.45764	5.08333	0.346363	11615.6	1967.64	10705.7	5779.4	301668	158872	8773.23	12185.4							TTTNKEGSPDAESLK
C1_08950W	PFK26	A0A1D8PEF9 [615-625]	A0A1D8PEF9 1xPhospho [T/S]	Pfk26p	0.469219	-1.36184	2.43545	0.604392	6693.38	3617.54	8038.32	6236.09	37326.3	18453.1	12734	8968.4
C1_08950W	PFK26	A0A1D8PEF9 [615-625]	A0A1D8PEF9 2xPhospho [T617; T619]	Pfk26p	0	-8.53866	8.53866	0	0	0	0	0	370.87	0	0	0			Y				PLPDKATTPTESRSP	PDKATTPTESRSPRQ
C1_08990C	KEX2	A0A1D8PEG3 [889-904]	A0A1D8PEG3 1xPhospho [S902]	Kexin	0.0802905	-11.7738	2.71813	-9.13598	531.148	0	305.853	255.751	2293.37	1207.28	0	0							EEEEGQQSAKAPSNS
C1_08990C	KEX2	A0A1D8PEG3 [807-832]	A0A1D8PEG3 2xPhospho [S822; S/Y]	Kexin	9.35005	12.3469	0	2.99686	0	0	651.597	0	0	0	2498.37	2710.06							PGEDYSDSDDDEDDS
C1_09020W	C1_09020W	A0A1D8PEH4 [140-147]	A0A1D8PEH4 1xPhospho [S143]	Uncharacterized protein	-2.33216	-0.885803	1.46418	2.91053	100.178	106.448	40.2317	0	571.853	0	178.806	130.214							HALRRYPSGEERCIA
C1_09030C	COX5	Q5APK5 [39-51]	Q5APK5 1xPhospho [S41]	Cytochrome c oxidase subunit Va	1.37808	-0.690056	1.79569	-0.272445	13.4145	0	17.1783	19.2882	29.9205	19.124	12.1135	17.9056							SAAPRALSNAYIGNL
C1_09090C	ARG81	A0A1D8PEG7 [2-9]	A0A1D8PEG7 1xAcetyl [N-Term]; 1xPhospho [S3]	Arg81p	-0.369939	0.031642	-0.578658	-0.177077	0	2.09132e+06	0	1.61829e+06	1.40032e+06	0	0	1.43137e+06							XXXXXMSSPSILSKN
C1_09090C	ARG81	A0A1D8PEG7 [814-825]	A0A1D8PEG7 1xPhospho [S819]	Arg81p	0	-21.5776	21.5776	0	0	0	0	0	0	3.12973e+06	0	0							SKSSITTSPSFVNKK
C1_09140C	SHO1	Q5AQ36 [175-198]	Q5AQ36 1xPhospho [S/Y]	High osmolarity signaling protein SHO1 (Osmosensor SHO1)	-11.7473	1.85852	-0.452702	13.1531	2049.24	1387.65	0	0	1687.95	823.019	5934.79	3173.5
C1_09140C	SHO1	Q5AQ36 [314-329]	Q5AQ36 1xPhospho [S320]	High osmolarity signaling protein SHO1 (Osmosensor SHO1)	-1.67965	1.37113	-0.897913	2.15286	2158.55	0	673.12	0	0	1157.95	1738.61	1258.26							RNTIYTDSETGTGIT
C1_09140C	SHO1	Q5AQ36 [314-329]	Q5AQ36 2xPhospho [T318; T/S]	High osmolarity signaling protein SHO1 (Osmosensor SHO1)	-3.17934	-14.1278	0.65984	-10.2886	5215.02	6114.57	0	1249.76	7288.77	10611.5	0	0			Y				NKRNTIYTDSETGTG
C1_09170W	CTA8	Q5AQ33 [568-573]	Q5AQ33 1xPhospho [S570]	Heat shock transcription factor (HSTF)	-0.029749	-0.331051	0.367946	0.0666446	3.49923e+06	3.19414e+06	1.43115e+06	5.12561e+06	4.50862e+06	4.12928e+06	3.70288e+06	3.16387e+06	Y			Y			RAHSRRPSMSRTKST
C1_09170W	CTA8	Q5AQ33 [752-760]	Q5AQ33 1xPhospho [S758]	Heat shock transcription factor (HSTF)	0.518498	-4.08581	1.92525	-2.67906	5.73742e+06	3.2078e+06	4.1023e+06	8.71139e+06	1.92623e+07	1.47118e+07	0	2.00077e+06							KRSIEEVSDHXXXXX
C1_09170W	CTA8	Q5AQ33 [753-760]	Q5AQ33 1xPhospho [S758]	Heat shock transcription factor (HSTF)	0.620963	-3.68112	1.80619	-2.49589	5.63163e+06	2.45174e+06	5.31533e+06	7.1161e+06	1.2208e+07	1.6061e+07	1.02723e+06	1.17662e+06							KRSIEEVSDHXXXXX
C1_09170W	CTA8	Q5AQ33 [576-587]	Q5AQ33 1xPhospho [T/S]	Heat shock transcription factor (HSTF)	-0.40869	0.898756	-0.401327	0.906119	1.89349e+07	9.8828e+06	1.32528e+07	8.45577e+06	1.03256e+07	1.1494e+07	2.82652e+07	1.24165e+07
C1_09180W	LYS143	A0A1D8PEI7 [2-20]	A0A1D8PEI7 1xAcetyl [N-Term]; 1xPhospho [S]	Lys143p	-0.950308	1.19846	-1.25596	0.892809	7868452	4.33338e+06	2.91276e+06	3.40196e+06	2.46391e+06	2.64519e+06	6.0942e+06	5.63089e+06
C1_09200W	LYS142	A0A1D8PEH6 [61-71]	A0A1D8PEH6 1xPhospho [S67]	Lys142p	-0.675336	-0.175652	0.701915	1.2016	6.61279e+06	1.34133e+07	5.91662e+06	6.62342e+06	1.59929e+07	1.65827e+07	1.46336e+07	1.42077e+07							KEIPLNDSPEPKAKK
C1_09210C	C1_09210C	A0A1D8PEJ7 [7-53]	A0A1D8PEJ7 1xPhospho [T/S]	Basic amino acid transporter	0.382565	2.05734	-0.773023	0.901753	5423394	6.75627e+06	6.22457e+06	9.65355e+06	3.61746e+06	3.50996e+06	1.28976e+07	1.6768e+07
C1_09210C	C1_09210C	A0A1D8PEJ7 [590-605]	A0A1D8PEJ7 2xPhospho [T/S]	Basic amino acid transporter	19.1551	-21.5895	21.5895	-19.1551	0	0	583793	0	1.44119e+06	1.71441e+06	0	0
C1_09210C	C1_09210C	A0A1D8PEJ7 [7-53]	A0A1D8PEJ7 2xPhospho [T25; S]	Basic amino acid transporter	-19.9987	-1.16464	1.39174	20.2258	0	1.04764e+06	0	0	1.0194e+06	1.72956e+06	0	1.22624e+06					Y		LQANAPSTPQNDSDS
C1_09260C	PTC1	A0A1D8PEN6 [11-24]	A0A1D8PEN6 1xPhospho [S/T]	Type 2C protein phosphatase	0.938598	-0.233439	1.42293	0.250892	6.4682e+06	2.09379e+06	1.01898e+07	6.22065e+06	1.04687e+07	1.24885e+07	1.07568e+07	8.77069e+06
C1_09260C	PTC1	A0A1D8PEN6 [11-24]	A0A1D8PEN6 2xPhospho [T21; T/S]	Type 2C protein phosphatase	0.856699	0	-18.5451	-19.4018	382503	0	692672	0	0	0	0	0		Y			Y		SSTSSPSTPTKTATT
C1_09280W	C1_09280W	A0A1D8PEJ4 [231-245]	A0A1D8PEJ4 1xPhospho [S]	J domain-containing protein	0.346922	-1.27706	0.69241	-0.93157	4.57356e+06	0	2.94136e+06	2.8755e+06	3.30935e+06	4.08144e+06	2.40248e+06	647220
C1_09280W	C1_09280W	A0A1D8PEJ4 [352-367]	A0A1D8PEJ4 1xPhospho [S364]	J domain-containing protein	0.973185	0.547046	1.22508	0.798936	1.66451e+06	1.9257e+06	2.57519e+06	4.47302e+06	4.43862e+06	3.95415e+06	5.86554e+06	6.39706e+06		Y					VGVDGLDSPVRAQPE
C1_09320C	C1_09320C	A0A1D8PEK5 [532-551]	A0A1D8PEK5 1xPhospho [S]	Uncharacterized protein	0.111069	1.50164	1.55026	2.94083	7311.23	9136.19	9082.32	8681.44	18600.2	29571.3	78459.1	57947.4
C1_09330W	C1_09330W	Q5APH1 [46-52]	Q5APH1 1xPhospho [S48]	Uncharacterized protein	-4.78388	-8.18307	3.39919	0	26.5481	0	0	0	175.732	113.904	0	0							LQQRKSQSLERKSNE
C1_09350W	CAF20	Q5AQ12 [105-117]	Q5AQ12 1xPhospho [S107]	Cap-associated protein CAF20	-0.285017	0.344738	-0.605503	0.0242524	6138.18	5451.73	3424.56	6087.46	4072.13	3544.9	5479.97	4193.32	Y						LSKPKKGSFAEGDAI
C1_09350W	CAF20	Q5AQ12 [106-117]	Q5AQ12 1xPhospho [S107]	Cap-associated protein CAF20	0.0725774	-0.16801	-0.510347	-0.750934	511.672	571.996	546.201	593.43	371.548	388.948	370.673	306.111	Y						LSKPKKGSFAEGDAI
C1_09350W	CAF20	Q5AQ12 [14-29]	Q5AQ12 1xPhospho [T18]	Cap-associated protein CAF20	0	-4.54915	4.54915	0	0	0	0	0	22.4115	0	0	0							ELKSEAHTPKPEILD
C1_09360C	EFR3	Q5APG7 [212-221]	Q5APG7 1xPhospho [S212]	Protein EFR3	0.0305273	-2.85398	1.55405	-1.33046	56478.4	252617	148810	166896	626361	281269	62729.6	62807.7							SILQRLKSNLHVEDD
C1_09490C	GUA1	Q5APF2 [2-14]	Q5APF2 1xAcetyl [N-Term]; 1xPhospho [S2]	GMP synthase [glutamine-hydrolyzing] (EC 6.3.5.2) (GMP synthetase) (Glutamine amidotransferase)	1.69917	-0.606881	2.78645	0.480404	1285.13	575.615	2611.06	3433.28	7105.57	5738.2	4567.11	3865.96							XXXXXXMSANIDDVP
C1_09540W	C1_09540W	A0A1D8PEN5 [35-41]	A0A1D8PEN5 1xPhospho [S37]	Uncharacterized protein	0.489423	-0.720054	0.520596	-0.688881	2.46911e+06	1.12806e+06	1.87272e+06	3.1773e+06	2.79278e+06	2.36754e+06	1.73787e+06	1.39482e+06							QIQQKHTSISSRQSS
C1_09540W	C1_09540W	A0A1D8PEN5 [42-50]	A0A1D8PEN5 1xPhospho [S44]	Uncharacterized protein	-0.346543	0.446861	-0.696024	0.09738	3241740	2.31457e+06	2.05423e+06	2.31563e+06	2.57958e+06	850167	2.28146e+06	2.39354e+06							SISSRQSSIVSLSKT
C1_09540W	C1_09540W	A0A1D8PEN5 [249-254]	A0A1D8PEN5 1xPhospho [T249]	Uncharacterized protein	1.78972	-19.3328	2.39499	-18.7276	125543	0	183526	250539	345927	314401	0	0							TSTGNEKTSPLKRLK
C1_09620C	C1_09620C	Q5APE0 [17-24]	Q5APE0 1xPhospho [T19]	Uncharacterized protein	0	-9.37934	9.37934	0	0	0	0	0	664.982	0	0	0							KQLQKNITQELLKYE
C1_09730W	DAM1	Q5APC8 [2-13]	Q5APC8 1xAcetyl [N-Term]; 1xPhospho [T8]	DASH complex subunit DAM1 (Outer kinetochore protein DAM1)	0.3899	0.162003	0.331034	0.103137	1.59073e+06	1.6979e+06	2.17635e+06	2.13275e+06	2.83439e+06	1.30242e+06	2.62102e+06	2.00741e+06					Y		MSSSKPVTPRNDRRQ
C1_09730W	DAM1	Q5APC8 [2-10]	Q5APC8 1xAcetyl [N-Term]; 1xPhospho [T8]	DASH complex subunit DAM1 (Outer kinetochore protein DAM1)	0.552783	-1.10286	0.861782	-0.793857	3.32781e+06	4.70899e+06	6.39485e+06	5.39444e+06	8.89585e+06	5.70928e+06	3.69749e+06	3.10257e+06					Y		MSSSKPVTPRNDRRQ
C1_09730W	DAM1	Q5APC8 [2-13]	Q5APC8 1xAcetyl [N-Term]; 2xPhospho [S2; T8]	DASH complex subunit DAM1 (Outer kinetochore protein DAM1)	-0.481288	-21.0997	2.77507	-17.8434	328298	0	0	235172	1.00649e+06	1.24074e+06	0	0					Y		XXXXXXMSSSKPVTP	MSSSKPVTPRNDRRQ
C1_09730W	DAM1	Q5APC8 [25-36]	Q5APC8 1xPhospho [S34]	DASH complex subunit DAM1 (Outer kinetochore protein DAM1)	-0.411158	0.493887	-1.73534	-0.830297	3.70437e+07	4.56007e+07	2.27126e+07	3.94376e+07	1.22572e+07	1.2564e+07	1.99984e+07	1.49557e+07							GIQLPSMSPKVHHYP
C1_09730W	DAM1	Q5APC8 [25-36]	Q5APC8 2xPhospho [S32; S34]	DASH complex subunit DAM1 (Outer kinetochore protein DAM1)	-0.639733	-0.931183	0.0754047	-0.216045	732516	730146	527180	411603	844403	696740	808219	0							SSGIQLPSMSPKVHH	GIQLPSMSPKVHHYP
C1_09750W	GET2	P0CB63 [2-16]	P0CB63 1xAcetyl [N-Term]; 1xPhospho [S]	Golgi to ER traffic protein 2	-0.675641	2.87351	0.384251	3.9334	1362.03	1204.46	590.945	1015.44	1835.93	1514.12	22436.5	2120.57
C1_09750W	GET2	P0CB63 [2-17]	P0CB63 1xAcetyl [N-Term]; 1xPhospho [S12]	Golgi to ER traffic protein 2	-0.458415	0.743822	0.529779	1.73202	271.147	300.47	191.641	224.102	370.13	455.562	867.325	516.058							VVDTAELSAEEKKRL
C1_09750W	GET2	P0CB63 [61-98]	P0CB63 1xPhospho [T85]	Golgi to ER traffic protein 2	-1.76452	-0.309381	0.882844	2.33799	3587.78	0	1055.26	0	3538.44	3078.28	3778.41	1561.02					Y		ITTPPPRTPPIGEDA
C1_09780C	C1_09780C	Q5APC2 [584-600]	Q5APC2 1xPhospho [S593]	Putative ferric-chelate reductase	0.157156	-1.85844	1.53558	-0.480011	4.14263e+06	5.07919e+06	2.81653e+06	7.46661e+06	1.32119e+07	1.35226e+07	4.03426e+06	3.33847e+06							EITGDSLSPQNTTSR
C1_09790C	C1_09790C	Q5APC1 [173-187]	Q5APC1 1xPhospho [S]	TRAMP complex RNA-binding subunit	0.79272	-1.43859	1.06423	-1.16708	30504.1	25053.9	38668.6	57577.3	70793.9	45381.6	26302.1	16557.8
C1_09850C	C1_09850C	Q5APB5 [557-573]	Q5APB5 1xPhospho [T566]	Uncharacterized protein	0.736569	-0.389775	1.63814	0.511801	5520.87	2418.4	5942.87	7286.27	18233.1	6481.15	10903.5	7959.44							GNGNNELTDDDVEIK
C1_09920W	VPS41	A0A1D8PEQ9 [26-46]	A0A1D8PEQ9 1xPhospho [S31]	Vacuolar protein sorting-associated protein 41	0	-20.787	20.787	0	0	0	0	0	947097	862161	0	0							VKDLDDASVNEAIPA
C1_09920W	VPS41	A0A1D8PEQ9 [497-512]	A0A1D8PEQ9 1xPhospho [T/S]	Vacuolar protein sorting-associated protein 41	-1.57298	0.324603	-0.0292466	1.86833	1.47742e+06	797964	0	764787	1.04919e+06	1.18053e+06	1.13218e+06	1.66014e+06
C1_09970C	PDC2	A0A1D8PER5 [617-642]	A0A1D8PER5 1xPhospho [S635]	Pdc2p	-0.863703	1.97671	-1.66638	1.17403	68940.5	190391	72065	70447.9	31051.3	50648.6	137766	183803							STSVVSDSPSGTTQK
C1_10000C	CPP1	Q5APU2 [207-216]	Q5APU2 1xPhospho [S213]	Dual specificity protein tyrosine phosphatase CCP1 (EC 3.1.3.48)	21.1101	-0.0486032	20.3877	-0.771075	0	0	1.18035e+06	1.08317e+06	0	1.37183e+06	0	1.32638e+06		Y					RSNFIMDSPSKKSTP
C1_10000C	CPP1	Q5APU2 [335-350]	Q5APU2 1xPhospho [S341]	Dual specificity protein tyrosine phosphatase CCP1 (EC 3.1.3.48)	0	21.2907	0	21.2907	0	0	0	0	0	0	411734	2.15354e+06							RGLPISMSPIQSSLN
C1_10010C	SWE1	Q5AP97 [1012-1022]	Q5AP97 1xPhospho [S1014]	Mitosis inhibitor protein kinase SWE1 (EC 2.7.11.1) (Wee1 homolog)	1.3026	-23.4106	2.22823	-22.4849	2.37966e+06	0	2.46093e+06	3.40908e+06	6.35791e+06	4.79221e+06	0	0							TPWRKLRSGDLSDAG
C1_10010C	SWE1	Q5AP97 [199-213]	Q5AP97 1xPhospho [S201]	Mitosis inhibitor protein kinase SWE1 (EC 2.7.11.1) (Wee1 homolog)	21.1783	-20.6216	20.6216	-21.1783	0	0	1.04449e+06	1.32862e+06	854960	758365	0	0	Y			Y			NSHVRKPSEEDTSSS
C1_10010C	SWE1	Q5AP97 [313-330]	Q5AP97 1xPhospho [S327]	Mitosis inhibitor protein kinase SWE1 (EC 2.7.11.1) (Wee1 homolog)	1.55175	-19.0537	0.0945361	-20.5109	509648	0	525595	968556	0	544162	0	0		Y					SPQSNLHSPSKLGSK
C1_10020W	SFU1	Q5AP95 [2-15]	Q5AP95 1xPhospho [S4]	Suppressor of ferric uptake 1	6.02311	0.206972	4.94803	-0.868105	0	9361.99	271249	337655	42252.5	246761	214767	118831					Y		XXXXMPTSPTESIPN
C1_10030W	DBP3	Q5APT8 [99-123]	Q5APT8 1xPhospho [S]	ATP-dependent RNA helicase DBP3 (EC 3.6.4.13)	1.24763	-0.958162	2.64245	0.436657	348.701	0	575.426	253.942	888.772	1293.73	440.792	682.082
C1_10030W	DBP3	Q5APT8 [344-355]	Q5APT8 1xPhospho [S352]	ATP-dependent RNA helicase DBP3 (EC 3.6.4.13)	0.911989	-0.573902	0.55812	-0.927771	2946.1	527.922	3233.11	3304.63	2278.85	2836.6	1617.38	1818.84		Y					LANNFMNSPVKVTVG
C1_10080W	CWC21	Q5AP89 [121-132]	Q5AP89 1xPhospho [T/S]	Pre-mRNA-splicing factor CWC21	0.318738	0.501732	-0.38225	-0.199256	1.40019e+06	2.47213e+06	1.64605e+06	3.18365e+06	1.27388e+06	1.69711e+06	2.10253e+06	2.10414e+06
C1_10090C	AIM21	Q5AP87 [448-460]	Q5AP87 1xPhospho [S/T]	Altered inheritance of mitochondria protein 21	8.92782	-9.68296	9.68296	-8.92782	0	0	0	486.015	475.09	345.89	0	0
C1_10090C	AIM21	Q5AP87 [168-180]	Q5AP87 1xPhospho [S]	Altered inheritance of mitochondria protein 21	-0.897382	-0.324284	-1.40768	-0.834577	3066.91	7392.48	2700.56	2914.21	2183.91	1757.8	1717.72	1430.31
C1_10090C	AIM21	Q5AP87 [234-250]	Q5AP87 1xPhospho [S236]	Altered inheritance of mitochondria protein 21	-0.419898	-0.709621	0.574106	0.284383	1898.65	2327.33	1419.73	1738.84	3771.26	2520.67	2342.82	1504.19							TKTEKSVSNEELDKP
C1_10090C	AIM21	Q5AP87 [2-22]	Q5AP87 1xPhospho [S4]	Altered inheritance of mitochondria protein 21	-0.0210002	0.236965	-0.140178	0.117787	4200.81	4441.31	4557.21	3960	3645.33	4196.49	4203.42	5038.43							XXXXMPDSEPLEPLN
C1_10090C	AIM21	Q5AP87 [703-713]	Q5AP87 1xPhospho [S708]	Altered inheritance of mitochondria protein 21	-2.25541	-2.32509	1.27194	1.20225	1718.97	2459.06	245.128	629.117	6451.64	3639.1	1150.69	862.229							EKEIISTSVEDLKKP
C1_10090C	AIM21	Q5AP87 [450-460]	Q5AP87 1xPhospho [T]	Altered inheritance of mitochondria protein 21	0.63865	-2.05513	1.20997	-1.48382	367.762	0	348.885	224.23	0	852.064	108.181	96.0891
C1_10090C	AIM21	Q5AP87 [603-611]	Q5AP87 1xPhospho [T604]	Altered inheritance of mitochondria protein 21	0	-0.226615	10.2164	9.98983	0	0	0	0	851.162	337.59	465.187	550.62	Y						SGIRKRSTENSVLSR
C1_10090C	AIM21	Q5AP87 [602-611]	Q5AP87 1xPhospho [T604]	Altered inheritance of mitochondria protein 21	1.65165	-11.6218	1.93397	-11.3395	323.894	499.873	1235.88	1354.47	1465.26	1685.23	0	0	Y						SGIRKRSTENSVLSR
C1_10090C	AIM21	Q5AP87 [168-180]	Q5AP87 2xPhospho [T172; S179]	Altered inheritance of mitochondria protein 21	0	-8.79613	8.79613	0	0	0	0	0	443.527	0	0	0			Y				HIKPSIPTIPSRPQS	TIPSRPQSRNLDFSE
C1_10090C	AIM21	Q5AP87 [474-496]	Q5AP87 2xPhospho [T475; S479]	Altered inheritance of mitochondria protein 21	0	-9.13036	9.13036	0	0	0	0	0	392.749	166.67	0	0			Y				KSSLSRATTNDSLTS	SRATTNDSLTSLNST
C1_10100C	NTF2	A0A1D8PES3 [54-61]	A0A1D8PES3 1xPhospho [S56]	Ran GTPase-binding protein	-0.267325	-2.24462	1.06149	-0.915806	34.7295	0	16.5449	12.1413	0	73.5704	0	14.7351							DIVEKLASLPFQKVA
C1_10120C	C1_10120C	Q5AP83 [27-47]	Q5AP83 1xPhospho [S]	Transcription initiation factor IIE subunit beta	-0.1553	-0.865613	0.735866	0.0255528	25730.7	21418	19915.8	22421.1	32072.1	46449.9	19667.7	23425.7
C1_10120C	C1_10120C	Q5AP83 [27-47]	Q5AP83 2xPhospho [S/T]	Transcription initiation factor IIE subunit beta	0.571214	0.348275	-1.26671	-1.48965	3203.45	5234.98	3915.13	8622.95	2045.04	1461.44	1607.5	2856.66
C1_10160W	MIR1	Q5AP79 [2-15]	Q5AP79 1xAcetyl [N-Term]; 1xPhospho [S5]	Mir1p	-2.35832	-1.62775	-0.975016	-0.24445	18.7932	145.99	0	31.3308	53.1365	30.2032	15.352	10.9397			Y				XXXMSTPSEYKLPEY
C1_10180C	ECM21	A0A1D8PET4 [70-84]	A0A1D8PET4 1xPhospho [S70]	Ecm21p	0	19.1624	0	19.1624	0	0	0	0	0	0	0	586745						Y	RSRSRSKSVGHGEAI
C1_10180C	ECM21	A0A1D8PET4 [70-84]	A0A1D8PET4 2xPhospho [S70; S78]	Ecm21p	0.319987	0.903765	-0.819095	-0.235317	3320325	3.03658e+06	3.28371e+06	4.65174e+06	2.01587e+06	1.58721e+06	2.95436e+06	3.78678e+06						Y	RSRSRSKSVGHGEAI	VGHGEAISPAYFSKN
C1_10190W	C1_10190W	A0A1D8PET7 [179-190]	A0A1D8PET7 1xPhospho [S181]	RRM domain-containing protein	6.10605	-2.0685	-0.270533	-8.44509	12723.7	19267.2	2.19051e+06	13151	16157.3	10363.4	3492.86	2829.1							NINHRITSNGPSHSS
C1_10200C	C1_10200C	Q5AP74 [28-40]	Q5AP74 2xPhospho [T37; T38]	Uncharacterized protein	2.67282	1.85431	0.468317	-0.350187	779200	0	2.17228e+06	2.79647e+06	1.07802e+06	0	2.27381e+06	1.62409e+06			Y				IDESSSITTQKSLKR	DESSSITTQKSLKRD
C1_10210C	CLA4	Q5APR8 [405-415]	Q5APR8 1xPhospho [S407]	Serine/threonine-protein kinase CLA4 (EC 2.7.11.1)	1.58016	1.43713	0.00251431	-0.14051	3288.87	4939.11	9323.47	15280.4	4792.51	3449.83	11103.6	11216.9							NNNTKNVSPLNNLMN
C1_10210C	CLA4	Q5APR8 [405-415]	Q5APR8 1xPhospho [S407]	Serine/threonine-protein kinase CLA4 (EC 2.7.11.1)	11.7222	0.939105	10.4652	-0.317854	0	0	1270.79	2106.8	893.257	519.429	1198.27	1511.24							NNNTKNVSPLNNLMN
C1_10210C	CLA4	Q5APR8 [570-582]	Q5APR8 1xPhospho [S572]	Serine/threonine-protein kinase CLA4 (EC 2.7.11.1)	0.95252	-0.186284	1.15876	0.0199546	1398.42	1508.7	2784.68	2842.26	4803.36	1688.45	2629.75	3075.57							QLASKQPSPPSSQQQ
C1_10210C	CLA4	Q5APR8 [619-636]	Q5APR8 2xPhospho [T/S]	Serine/threonine-protein kinase CLA4 (EC 2.7.11.1)	0.867671	0.316671	1.65355	1.10255	1605.58	2206.14	3033.07	3923.05	8023.06	3971.05	6117.49	8820.86
C1_10210C	CLA4	Q5APR8 [619-636]	Q5APR8 3xPhospho [T624; T630; S632]	Serine/threonine-protein kinase CLA4 (EC 2.7.11.1)	0	-0.673554	11.3671	10.6936	0	0	0	0	1760.46	880.034	792.308	862.801							SKEALNETSGVSKTP	ETSGVSKTPSPTDKS	SGVSKTPSPTDKSNK
C1_10220C	TPK1	Q5AP71 [30-59]	Q5AP71 1xPhospho [S/T]	Tpk1p	1.1098	-0.303084	3.99956	2.58668	726.578	789.04	1817.56	1454.54	15576	8681.5	10917.7	8743.29
C1_10220C	TPK1	Q5AP71 [60-72]	Q5AP71 1xPhospho [S]	Tpk1p	1.54688	2.80133	1.65431	2.90876	868.71	1491.61	3310.88	3587.54	5705.86	1725.94	29385.8	22426
C1_10220C	TPK1	Q5AP71 [60-72]	Q5AP71 2xPhospho [S/T]	Tpk1p	-8.33526	-1.42068	5.18493	12.0995	321.972	0	0	0	6623.52	5124.02	2716.3	1671.2
C1_10230C	C1_10230C	A0A1D8PES9 [333-339]	A0A1D8PES9 1xPhospho [S335]	Uncharacterized protein	-7.35017	-0.62833	1.77213	8.49396	800399	1484.56	2469.23	2444.4	2.73536e+06	3535.29	20026.9	1.75183e+06	Y						SKKKRKTSFSNKTRE
C1_10260C	RPA34	Q5AP67 [7-29]	Q5AP67 1xPhospho [S/Y]	DNA-directed RNA polymerase I subunit	0.476715	0.681933	-0.466604	-0.261386	974.263	1187.53	1135.53	1873.15	1009.22	554.915	1229.3	1280.63
C1_10260C	RPA34	Q5AP67 [157-190]	Q5AP67 1xPhospho [S/Y]	DNA-directed RNA polymerase I subunit	6.57445	-6.64555	6.64555	-6.57445	0	0	21.8627	72.4401	37.5605	61.5572	0	0
C1_10260C	RPA34	Q5AP67 [7-23]	Q5AP67 1xPhospho [S]	DNA-directed RNA polymerase I subunit	0.479815	0.783732	-1.21597	-0.912057	544.628	838.751	911.283	1018.32	341.278	253.673	599.826	425.151
C1_10260C	RPA34	Q5AP67 [172-190]	Q5AP67 1xPhospho [S181]	DNA-directed RNA polymerase I subunit	-0.135951	-10.4842	1.98888	-8.35936	224.04	135.823	186.689	140.722	750.833	680.535	0	0							EEEEEEESENDDVEA
C1_10260C	RPA34	Q5AP67 [30-39]	Q5AP67 1xPhospho [T35]	DNA-directed RNA polymerase I subunit	2.31768	-5.16694	1.41894	-6.06568	12.4357	0	31.644	34.3371	34.9256	0	0	0							PKNFQKVTPESKEFS
C1_10260C	RPA34	Q5AP67 [7-29]	Q5AP67 2xPhospho [S/Y]	DNA-directed RNA polymerase I subunit	-0.108016	0.485716	-0.723843	-0.130112	1069.42	1668.78	1077.09	1463.51	1104.11	553.428	1377.41	944.006
C1_10260C	RPA34	Q5AP67 [7-23]	Q5AP67 2xPhospho [Y/S]	DNA-directed RNA polymerase I subunit	0.142113	1.13846	-0.125237	0.87111	39.8953	108.291	76.4019	87.2282	61.3827	74.3992	142.615	157.505
C1_10260C	RPA34	Q5AP67 [7-29]	Q5AP67 3xPhospho [S14; S16; S19]	DNA-directed RNA polymerase I subunit	-1.10722	0.260244	-0.49959	0.867871	1051.05	193.122	316.196	260.8	479.182	400.54	653.306	400.518			Y				SSEYIDDSDSELSAE	EYIDDSDSELSAEER	DDSDSELSAEEREYE
C1_10350C	C1_10350C	A0A1D8PEU9 [746-761]	A0A1D8PEU9 1xPhospho [S]	Uncharacterized protein	-14.0365	6.38174	-0.0504934	20.3677	0	16802.8	0	0	12415.5	3809.31	1.3496e+06	3406
C1_10350C	C1_10350C	A0A1D8PEU9 [540-556]	A0A1D8PEU9 1xPhospho [S]	Uncharacterized protein	-1.57824	-13.2877	-1.52499	-13.2344	8131.31	20645.4	2545.56	7090.82	7756.4	2242.35	0	0
C1_10350C	C1_10350C	A0A1D8PEU9 [499-518]	A0A1D8PEU9 1xPhospho [S510]	Uncharacterized protein	-0.340498	6.60002	0.312336	7.25286	125077	0	62709.4	36072	100619	54691.1	1.50424e+07	23933.4							LDDDDDESPLEEEDN
C1_10350C	C1_10350C	A0A1D8PEU9 [638-656]	A0A1D8PEU9 1xPhospho [S654]	Uncharacterized protein	-0.610452	7.12085	-1.59656	6.13475	157723	333218	139735	181827	119630	42706.5	2.25275e+07	67283.5							GVTSGTNSAKHTRMS
C1_10350C	C1_10350C	A0A1D8PEU9 [638-656]	A0A1D8PEU9 2xPhospho [S654; S/T]	Uncharacterized protein	11.052	7.09075	13.3105	9.34925	0	0	0	2122.13	7109.77	3048.24	1.38024e+06	4538.34							GVTSGTNSAKHTRMS
C1_10380C	CBK1	Q5AP53 [93-105]	Q5AP53 1xPhospho [S103]	Serine/threonine-protein kinase CBK1 (EC 2.7.11.1) (Cell wall biosynthesis kinase 1)	0.31904	0.52738	-0.694297	-0.485958	11194.1	11166	9578.16	18316.3	6352.02	7466.36	10081.5	9835.53							QMSAFMPSPRFAQSE
C1_10380C	CBK1	Q5AP53 [93-105]	Q5AP53 1xPhospho [S103]	Serine/threonine-protein kinase CBK1 (EC 2.7.11.1) (Cell wall biosynthesis kinase 1)	11.8385	8.85026	0	-2.98825	0	0	1805.48	1855.77	0	0	0	460.524							QMSAFMPSPRFAQSE
C1_10420C	C1_10420C	Q59NC8 [20-33]	Q59NC8 1xPhospho [T28]	LDB19 domain-containing protein	0.456958	-1.55515	1.12043	-0.891675	1.61659e+06	738428	2.05065e+06	1.18194e+06	1.0383e+06	4.08179e+06	0	1.74233e+06			Y				SSASTTITPVSSRTS
C1_10440W	C1_10440W	A0A1D8PEU5 [495-505]	A0A1D8PEU5 1xPhospho [S/T]	Fibronectin type-III domain-containing protein	-5.94538	-21.9006	0.236794	-15.7184	0	3.32237e+06	0	53914.2	2.07158e+06	1.84341e+06	0	0
C1_10440W	C1_10440W	A0A1D8PEU5 [521-539]	A0A1D8PEU5 1xPhospho [S]	Fibronectin type-III domain-containing protein	-7.19516	-6.91961	0.611564	0.887108	14073744	9.32206e+06	90254.1	69399.2	2.04035e+07	1.53433e+07	153120	142154
C1_10440W	C1_10440W	A0A1D8PEU5 [496-505]	A0A1D8PEU5 1xPhospho [S498]	Fibronectin type-III domain-containing protein	-7.24881	-6.59499	0.339861	0.993675	6.92095e+06	1.23858e+07	67225.7	59713.8	1.59495e+07	8.48571e+06	105140	147629							FNGKRNLSPTEDHLK
C1_10460W	C1_10460W	A0A1D8PEV8 [2-20]	A0A1D8PEV8 1xAcetyl [N-Term]; 1xPhospho [S5]	Uncharacterized protein	0.687966	-1.72224	-7.69368	-10.1039	2.71503e+06	8470.93	2.35456e+06	2.03304e+06	6348.23	6806.07	2227.29	1758.8							XXXMSSLSRSNSTGS
C1_10460W	C1_10460W	A0A1D8PEV8 [2-20]	A0A1D8PEV8 1xAcetyl [N-Term]; 2xPhospho [T10; S]	Uncharacterized protein	1.94106	0.406271	-5.77238	-7.30717	936570	3795.31	865975	2.74491e+06	11636.4	5566.89	4783.94	18015.1			Y				SLSRSNSTGSVPYLD
C1_10460W	C1_10460W	A0A1D8PEV8 [369-395]	A0A1D8PEV8 1xPhospho [S370]	Uncharacterized protein	-0.486373	-0.841704	-7.40012	-7.75545	3832723	5496.22	0	2.73979e+06	14867.9	7854.49	6999.51	5678.76							ENEKIKNSPVQRPVN
C1_10460W	C1_10460W	A0A1D8PEV8 [7-20]	A0A1D8PEV8 1xPhospho [T/S]	Uncharacterized protein	1.41813	-0.571951	-7.48954	-9.47961	43674997	151178	3.75398e+07	7.95804e+07	151305	92563.7	81743.9	82308
C1_10460W	C1_10460W	A0A1D8PEV8 [7-20]	A0A1D8PEV8 1xPhospho [T/S]	Uncharacterized protein	1.79539	-0.1939	-9.77955	-11.7688	1.81236e+06	6681.57	2.33209e+06	3.98198e+06	2068.69	0	0	1808.4
C1_10470W	C1_10470W	A0A1D8PEV9 [115-132]	A0A1D8PEV9 1xPhospho [S]	Mitochondrial 37S ribosomal protein MRPS5	-0.0851377	0.380226	-0.828192	-0.362828	798.528	660.262	573.236	801.9	745.545	75.6587	552.424	516.713
C1_10480W	DJP1	A0A1D8PEX2 [25-32]	A0A1D8PEX2 1xPhospho [Y26]	Djp1p	4.82476	0	0	-4.82476	0	0	27.3398	0	0	0	0	0	Y						SLEIKKAYRKAAIKL
C1_10530W	SNL1	Q59NB3 [85-96]	Q59NB3 1xPhospho [T94]	Snl1p	8.82132	0.0881225	8.93053	0.197334	0	0	201.813	249.544	323.75	163.179	231.333	286.329		Y					GGGRAEETPKKKPRK
C1_10540C	C1_10540C	A0A1D8PEW0 [2-10]	A0A1D8PEW0 1xAcetyl [N-Term]; 1xPhospho [S]	Uncharacterized protein	5.43464	-13.3107	-1.41334	-20.1586	17935.5	9125.92	101257	1.0692e+06	10159.3	0	0	0
C1_10540C	C1_10540C	A0A1D8PEW0 [367-377]	A0A1D8PEW0 1xPhospho [S/T]	Uncharacterized protein	7.15091	-0.0495184	1.06097	-6.13947	50654.3	35991.3	3.76113e+06	8.55265e+06	119535	61238	95831.9	78841.2
C1_10540C	C1_10540C	A0A1D8PEW0 [163-170]	A0A1D8PEW0 1xPhospho [S164]	Uncharacterized protein	6.59433	-0.0270032	-1.21892	-7.84025	24578.2	14915.8	1.99406e+06	1.82216e+06	7657.3	9308.95	7729.79	8921.83	Y						KPVARKSSFPMPSKP
C1_10540C	C1_10540C	A0A1D8PEW0 [247-260]	A0A1D8PEW0 1xPhospho [S256]	Uncharacterized protein	6.96844	-0.403786	-0.777556	-8.14979	136155	73170.2	1.11828e+07	1.50313e+07	68197.5	53913	43961.3	48338.3							TSTPQAVSPDSKRPV
C1_10540C	C1_10540C	A0A1D8PEW0 [332-341]	A0A1D8PEW0 1xPhospho [S338]	Uncharacterized protein	8.201	-0.133194	-0.0589391	-8.39313	7864	0	1.69514e+06	619295	6448.85	1100.31	4122.85	2760.47		Y					KSASASVSPEKVEKK
C1_10540C	C1_10540C	A0A1D8PEW0 [39-54]	A0A1D8PEW0 3xPhospho [S47; S49; S51]	Uncharacterized protein	6.23808	0.888523	-2.25115	-7.6007	86234.1	98012.1	5.7555e+06	8.15204e+06	15011.7	23689.7	47589.9	24058.1						Y	IDELQSRSASTSPSK	ELQSRSASTSPSKSS	QSRSASTSPSKSSIS
C1_10540C	C1_10540C	A0A1D8PEW0 [39-54]	A0A1D8PEW0 4xPhospho [S45; S47; S49; S51]	Uncharacterized protein	4.61384	0.162216	-2.20836	-6.65998	20203.6	0	494714	0	0	4370.88	4891.16	0						Y	RNIDELQSRSASTSP	IDELQSRSASTSPSK	ELQSRSASTSPSKSS	QSRSASTSPSKSSIS
C1_10640C	PEA2	A0A1D8PEX7 [277-294]	A0A1D8PEX7 1xPhospho [S]	Pea2p	-0.788692	-0.441531	0.0428603	0.390021	4224.26	4062.86	2438.38	2358.35	4380.66	4156.39	3695.37	2590.64
C1_10640C	PEA2	A0A1D8PEX7 [295-306]	A0A1D8PEX7 1xPhospho [S303]	Pea2p	-1.00338	-0.390654	-0.00955605	0.603174	11777.4	19011.9	6153.83	9204.27	16593.4	13992.7	13588.9	9741.43		Y			Y		PNNRDPTSPNKYHFP
C1_10640C	PEA2	A0A1D8PEX7 [337-352]	A0A1D8PEX7 1xPhospho [S342]	Pea2p	-1.44012	-0.846215	0.432761	1.02667	6169.68	7874.01	2354.4	2820.57	9985.32	8971.41	5397.01	5147.08							QRNIPLPSPPATDGF
C1_10640C	PEA2	A0A1D8PEX7 [277-294]	A0A1D8PEX7 2xPhospho [T/S]	Pea2p	-0.575884	-0.331144	0.040089	0.284829	9951.47	11047.4	7713.54	6373.72	10674.9	10915.6	8511.91	8650.35
C1_10640C	PEA2	A0A1D8PEX7 [277-294]	A0A1D8PEX7 3xPhospho [S287; S290; S291]	Pea2p	-2.36179	0.160784	-2.62453	-0.101961	1614.68	561.598	236.951	185.639	352.062	0	0	393.686			Y				ANTTLNQSPISSPGK	TLNQSPISSPGKIPN	LNQSPISSPGKIPNN
C1_10670C	RPA190	A0A1D8PEX3 [146-169]	A0A1D8PEX3 1xPhospho [S148]	DNA-directed RNA polymerase subunit (EC 2.7.7.6)	6.76894	-1.53287	9.23666	0.934847	0	0	0	108.057	345.19	257.081	0	207.483							AKSSKSSSVIDVDGE
C1_10680C	C1_10680C	A0A1D8PEY6 [2-22]	A0A1D8PEY6 1xAcetyl [N-Term]; 1xPhospho [T/S]	Tricalbin	-0.471709	-0.591747	1.19556	1.07552	110.15	106.324	69.8258	85.9964	341.86	155.227	174.695	154.806
C1_10680C	C1_10680C	A0A1D8PEY6 [67-86]	A0A1D8PEY6 1xPhospho [S/T]	Tricalbin	-1.19638	-1.28103	0.146427	0.0617815	764.358	1029.39	322.515	459.655	1360.57	624.903	517.118	299.318
C1_10680C	C1_10680C	A0A1D8PEY6 [57-66]	A0A1D8PEY6 1xPhospho [T/S]	Tricalbin	-1.06507	0.872581	1.01007	2.94771	998.15	633.778	292.955	486.504	1687.58	1600.14	3005.74	3014.69
C1_10680C	C1_10680C	A0A1D8PEY6 [57-66]	A0A1D8PEY6 2xPhospho [T/S]	Tricalbin	-1.97047	-0.923604	1.81778	2.86465	218.856	191.683	55.5316	48.4806	915.858	533.973	361.572	402.291
C1_10680C	C1_10680C	A0A1D8PEY6 [57-66]	A0A1D8PEY6 3xPhospho [S57; S60; S62]	Tricalbin	0	-6.81915	6.81915	0	0	0	0	0	80.144	31.7755	0	0			Y				SNHKASKSTTSLSSL	KASKSTTSLSSLSRS	SKSTTSLSSLSRSSS
C1_10680C	C1_10680C	A0A1D8PEY6 [57-86]	A0A1D8PEY6 4xPhospho [S57; S60; S62; S63]	Tricalbin	-2.83779	-2.18562	1.01441	1.66658	89.0101	20.258	0	14.4237	175.12	46.6298	30.6543	17.3101			Y				SNHKASKSTTSLSSL	KASKSTTSLSSLSRS	SKSTTSLSSLSRSSS	KSTTSLSSLSRSSSQ
C1_10700C	NIT3	Q59WF0 [2-12]	Q59WF0 1xAcetyl [N-Term]; 1xPhospho [S8]	Putative hydrolase	6.96075	-1.8886	11.6727	2.82337	0	0	123.564	0	1435.43	1828.22	400.011	480.674							MSNQVLKSPLSKSIK
C1_10780C	HNT1	Q59WG0 [2-11]	Q59WG0 1xAcetyl [N-Term]; 1xPhospho [S6]	Adenosine 5'-monophosphoramidase	0.293079	0.681388	-0.512021	-0.123712	1272.48	1306.8	1325.48	1835.01	1033.59	774.805	1676.19	1224.5			Y				XXMASHASCIFCKII
C1_10790W	CDC48	Q59WG3 [765-773]	Q59WG3 1xPhospho [S]	AAA family ATPase	0.735947	-2.2822	2.10394	-0.914208	0	21.4514	11.2219	25.1708	59.053	36.4617	9.25718	9.58466
C1_10790W	CDC48	Q59WG3 [766-774]	Q59WG3 1xPhospho [S768]	AAA family ATPase	0.408456	-6.3178	0.722226	-6.00403	37.5183	9.83613	27.1467	36.0325	45.1903	33.5813	0	0						Y	KTAKRSVSDAELRRY
C1_10790W	CDC48	Q59WG3 [766-773]	Q59WG3 1xPhospho [S768]	AAA family ATPase	0.725993	-0.181801	1.10583	0.198038	6.91876	0	0	12.0979	13.2094	2.83362	3.77722	10.2479						Y	KTAKRSVSDAELRRY
C1_10790W	CDC48	Q59WG3 [732-753]	Q59WG3 1xPhospho [T732]	AAA family ATPase	0.829629	-2.25825	0.775538	-2.31234	8.89346	36.8077	24.6854	57.3132	59.3937	19.5507	10.4451	5.26528							EEKEKVKTEDVDMKV
C1_10800C	ALP1	Q59WG4 [2-14]	Q59WG4 1xAcetyl [N-Term]; 1xPhospho [S/T/Y]	Alp1p	1.02336	1.35153	-0.149705	0.178467	49234.9	27335.5	85163.2	70478.5	33885.3	35137.8	84192.6	91944.3
C1_10840C	C1_10840C	A0A1D8PEZ9 [180-190]	A0A1D8PEZ9 1xPhospho [S/T]	DAO domain-containing protein	-7.40315	-0.803306	-6.47801	0.121836	3.54772e+07	231642	99869.7	111092	212943	187646	91815.3	137736
C1_10840C	C1_10840C	A0A1D8PEZ9 [154-173]	A0A1D8PEZ9 1xPhospho [S160]	DAO domain-containing protein	-18.5673	0	-18.5673	0	388423	0	0	0	0	0	0	0			Y				KRTTTHDSDSSSSIT
C1_10840C	C1_10840C	A0A1D8PEZ9 [155-172]	A0A1D8PEZ9 1xPhospho [S160]	DAO domain-containing protein	-7.86822	-14.0366	-5.45133	-11.6197	729369	5893	0	3145.83	6857.58	9946.09	0	0			Y				KRTTTHDSDSSSSIT
C1_10860C	ADA2	Q59WH0 [349-356]	Q59WH0 1xPhospho [S350]	Transcriptional adapter 2	-6.5212	1.71847	-7.80044	0.439223	3577.8	6339.3	0	106.982	43.49	0	90.0961	55.3143				Y			NGHRNKFSPQPEFRS
C1_10860C	ADA2	Q59WH0 [347-356]	Q59WH0 1xPhospho [S350]	Transcriptional adapter 2	-5.35555	-4.13408	-0.300389	0.921083	121940	150654	2998.16	3658.73	7294.74	214061	6091.14	6514.83				Y			NGHRNKFSPQPEFRS
C1_10870W	RPS17B	A0A1D8PEY9 [117-128]	A0A1D8PEY9 1xPhospho [S/T]	Ribosomal 40S subunit protein S17B	-0.408956	-0.846962	0.835273	0.397267	94.6467	133.484	72.9595	98.6142	270.252	137.561	112.706	113.575
C1_10870W	RPS17B	A0A1D8PEY9 [112-116]	A0A1D8PEY9 1xPhospho [S112]	Ribosomal 40S subunit protein S17B	2.79344	0.398856	2.91394	0.519362	0	0	5.93279	0	0	6.53675	0	8.93692							DTADLVKSLGFKIPV
C1_10870W	RPS17B	A0A1D8PEY9 [34-44]	A0A1D8PEY9 1xPhospho [S36]	Ribosomal 40S subunit protein S17B	0.562338	0.926567	-0.606317	-0.242088	4.29878	27.025	26.1158	20.6154	14.0891	6.14349	15.8609	23.4968							ETNKRLTSEIAVIQS
C1_10870W	RPS17B	A0A1D8PEY9 [64-72]	A0A1D8PEY9 1xPhospho [S70]	Ribosomal 40S subunit protein S17B	-1.55274	0	-4.68555	-3.13281	9.02789	15.7051	3.98925	3.78215	0	0	0	0							KGPVRGISFKLQEEE
C1_10910C	C1_10910C	Q59WH5 [44-53]	Q59WH5 1xPhospho [S]	Rad60-SLD domain-containing protein	1.67053	-3.16396	3.49544	-1.33906	1093.71	1567.88	2966.84	5508.03	23003.6	7024.03	2226.61	1122.72
C1_10910C	C1_10910C	Q59WH5 [180-199]	Q59WH5 1xPhospho [S190]	Rad60-SLD domain-containing protein	0	15.7497	0	15.7497	0	0	0	0	0	0	9268.81	45828.7							MEDSEEESDHELEEL
C1_10910C	C1_10910C	Q59WH5 [41-53]	Q59WH5 1xPhospho [S51]	Rad60-SLD domain-containing protein	1.0349	-0.536066	1.49806	-0.0729044	15158.5	14683.4	31118.8	30027.5	41526.7	42767.6	16074.8	42058.3		Y	Y				ELNDSDDSPKRKKKK
C1_10910C	C1_10910C	Q59WH5 [150-160]	Q59WH5 1xPhospho [T/S]	Rad60-SLD domain-containing protein	-0.0490824	0.046194	0.621633	0.716909	19627.5	12721.9	10900.3	20366.9	27783.6	21990	21060.5	30332.8
C1_10910C	C1_10910C	Q59WH5 [150-160]	Q59WH5 2xPhospho [S152; T154]	Rad60-SLD domain-containing protein	-1.4522	-1.74749	1.0663	0.771009	8498.13	19543.8	1705.67	8541.99	32554.7	26167.8	12708.6	4779.41						Y	ISLSRSVSITPPLVD	LSRSVSITPPLVDRN
C1_10910C	C1_10910C	Q59WH5 [41-53]	Q59WH5 2xPhospho [S48; S51]	Rad60-SLD domain-containing protein	1.00902	-0.681197	0.763418	-0.926802	36262.7	7195.94	43192.7	44270.9	40127.2	33644.9	30927.6	15079.8			Y				LSRELNDSDDSPKRK	ELNDSDDSPKRKKKK
C1_10910C	C1_10910C	Q59WH5 [10-40]	Q59WH5 3xPhospho [S31; T/S/Y]	Rad60-SLD domain-containing protein	-11.4607	-11.5648	0.104095	0	1846.35	971.085	0	0	3028.31	0	0	0							ESILNEVSSENNELT
C1_10950C	C1_10950C	Q59WI0 [357-368]	Q59WI0 1xPhospho [T/S]	Serine/threonine-protein kinase RIO1 (EC 2.7.11.1)	-0.0986449	0.140372	-0.969405	-0.730389	3289.94	4904.87	3894.28	3758.86	1238.11	2946.63	3540.93	1071.54
C1_10970W	C1_10970W	A0A1D8PEZ5 [405-418]	A0A1D8PEZ5 1xPhospho [S]	NUC153 domain-containing protein	10.3281	-0.14374	3.0277	-7.44413	46711.4	39726.9	6.32152e+07	4.79008e+07	336660	368258	348361	289709
C1_10970W	C1_10970W	A0A1D8PEZ5 [497-511]	A0A1D8PEZ5 1xPhospho [S504]	NUC153 domain-containing protein	9.27386	-4.03013	4.8662	-8.43779	1248.09	567.604	808477	316105	38680.9	14303.2	3242.13	0							QTEEVANSQEGSADK
C1_10970W	C1_10970W	A0A1D8PEZ5 [405-418]	A0A1D8PEZ5 2xPhospho [S411; S/Y]	NUC153 domain-containing protein	9.77177	-1.10695	3.67221	-7.20651	182553	92486.6	1.39573e+08	1.00858e+08	1.77635e+06	1.72989e+06	1.15458e+06	473278							KAYLASDSDESEVEK
C1_10970W	C1_10970W	A0A1D8PEZ5 [245-269]	A0A1D8PEZ5 3xPhospho [S250; S252; S257]	NUC153 domain-containing protein	10.2561	2.14475	0.764373	-7.34695	40069	1834.02	5.12438e+07	0	71178.6	0	224993	89772.8							KKKKEEDSDSEDIES	KKEEDSDSEDIESDV	SDSEDIESDVDVNDA
C1_10970W	C1_10970W	A0A1D8PEZ5 [405-418]	A0A1D8PEZ5 3xPhospho [S409; S411; S414]	NUC153 domain-containing protein	8.34225	-3.87409	4.52711	-7.68922	36132.2	6376.2	7.80955e+06	5.98645e+06	556450	423676	44842.2	22001.5			Y				DFKAYLASDSDESEV	KAYLASDSDESEVEK	LASDSDESEVEKDSS
C1_10990C	RTG3	A0A1D8PF20 [242-252]	A0A1D8PF20 1xPhospho [S247]	Rtg3p	-5.9477	7.28533	-6.68735	6.54568	83791.4	9.99895e+06	61152.3	102205	41888.1	55943.9	180338	1.50809e+07							DKNNLAFSPDFSKRQ
C1_11050W	C1_11050W	A0A1D8PF15 [92-96]	A0A1D8PF15 1xPhospho [S94]	RRM domain-containing protein	-3.3436	18.805	-23.6129	-1.46426	7821230	5.00739e+06	1.26373e+06	0	0	0	458003	0	Y						DPNNRRFSFKRKSSI
C1_11050W	C1_11050W	A0A1D8PF15 [250-271]	A0A1D8PF15 1xPhospho [T254]	RRM domain-containing protein	0.0511128	-0.534196	0.507536	-0.0777728	2.07142e+06	6.18759e+06	1.76562e+06	6.79124e+06	7.61039e+06	4.13079e+06	4.40446e+06	3.70334e+06							QSKSLENTEGCGDTS
C1_11080W	C1_11080W	Q59WJ3 [72-84]	Q59WJ3 1xPhospho [S/T]	6-phosphofructo-2-kinase	1.86446	2.40139	-1.74293	-1.20601	2.41386e+06	4.77797e+06	9.22486e+06	1.69629e+07	696126	1.45252e+06	6.00363e+06	5.3479e+06
C1_11080W	C1_11080W	Q59WJ3 [28-51]	Q59WJ3 1xPhospho [S44]	6-phosphofructo-2-kinase	1.28163	1.1289	-0.60455	-0.75728	1.91032e+06	1.23626e+06	1.65489e+06	5.99486e+06	2.06943e+06	0	1.16135e+06	3.36432e+06			Y		Y		ESSSSPHSPSGADLR
C1_11080W	C1_11080W	Q59WJ3 [85-92]	Q59WJ3 1xPhospho [S87]	6-phosphofructo-2-kinase	3.1218	-21.2937	1.99437	-22.4211	645152	0	3.04825e+06	2.56764e+06	1.38306e+06	1.18751e+06	0	0							PILSRHDSNPGFKNN
C1_11080W	C1_11080W	Q59WJ3 [72-84]	Q59WJ3 2xPhospho [T/S]	6-phosphofructo-2-kinase	21.0606	2.92048	18.4533	0.313215	0	0	954968	1.23212e+06	0	358923	1.38056e+06	1.33685e+06
C1_11120C	C1_11120C	Q59WJ7 [12-24]	Q59WJ7 1xPhospho [S]	Uncharacterized protein	-0.0319339	-1.20668	-0.603234	-1.77798	40.2145	49.465	36.5714	51.123	31.806	26.8863	24.8625	0
C1_11120C	C1_11120C	Q59WJ7 [136-145]	Q59WJ7 1xPhospho [S]	Uncharacterized protein	1.37812	-0.860096	1.97364	-0.26458	144.817	65.5731	236.334	312.132	422.689	406.561	240.068	216.33
C1_11120C	C1_11120C	Q59WJ7 [158-174]	Q59WJ7 1xPhospho [S169]	Uncharacterized protein	-0.356526	-0.118222	0.932383	1.17069	365.879	371.752	291.946	283.957	864.644	543.98	600.611	697.107					Y		VVSIQPTSPQLPKTL
C1_11130W	FGR16	Q59WJ8 [200-211]	Q59WJ8 1xPhospho [S206]	U4/U6-U5 snRNP complex subunit	-0.269688	0.285153	0.506082	1.06092	15359191	1.24287e+07	1.40377e+07	9.01232e+06	2.06815e+07	1.87825e+07	2.83822e+07	1.97062e+07							RQYYIDVSDEEEKDA
C1_11200W	C1_11200W	A0A1D8PF42 [516-537]	A0A1D8PF42 1xPhospho [S/T/Y]	Uncharacterized protein	-1.5793	-1.53127	-0.50617	-0.458141	19.1628	18.529	4.16317	7.78479	15.5197	10.7228	2.65449	5.77063
C1_11200W	C1_11200W	A0A1D8PF42 [2491-2508]	A0A1D8PF42 1xPhospho [S/T/Y]	Uncharacterized protein	-1.30621	-1.4419	1.03029	0.894596	10.301	9.75498	0	7.51464	34.4589	7.54654	14.8295	0
C1_11200W	C1_11200W	A0A1D8PF42 [1618-1628]	A0A1D8PF42 1xPhospho [S/T]	Uncharacterized protein	-1.45843	-0.613623	0.499703	1.34451	79.3392	56.8879	11.8227	37.1128	124.694	68.3347	72.8168	52.9911
C1_11200W	C1_11200W	A0A1D8PF42 [1988-2009]	A0A1D8PF42 1xPhospho [S/T]	Uncharacterized protein	-0.745568	-1.88913	0.77348	-0.370083	525.87	176.509	225.239	193.28	655.614	545.734	107.953	215.645
C1_11200W	C1_11200W	A0A1D8PF42 [1192-1204]	A0A1D8PF42 1xPhospho [S/T]	Uncharacterized protein	-0.543485	-1.12364	0.631626	0.05147	23.8245	10.4254	8.32737	14.858	38.0015	15.6115	0	24.0638
C1_11200W	C1_11200W	A0A1D8PF42 [1618-1651]	A0A1D8PF42 1xPhospho [S/T]	Uncharacterized protein	-0.207283	0.0931892	0.136637	0.437109	519.591	639.334	426.287	577.403	835.26	438.892	622.683	736.555
C1_11200W	C1_11200W	A0A1D8PF42 [337-364]	A0A1D8PF42 1xPhospho [S/T]	Uncharacterized protein	0	-4.92459	4.92459	0	0	0	0	0	14.2907	15.0796	0	0
C1_11200W	C1_11200W	A0A1D8PF42 [952-964]; [1149-1161]	A0A1D8PF42 1xPhospho [S/T]; 1xPhospho [S/T]	Uncharacterized protein	-1.00064	-0.534542	-1.02606	-0.559959	248.383	134.96	101.357	89.7295	107.987	79.7445	75.5047	53.7915
C1_11200W	C1_11200W	A0A1D8PF42 [2353-2373]	A0A1D8PF42 1xPhospho [S/Y]	Uncharacterized protein	-1.79611	0.726027	-0.462984	2.05915	30.3925	86.825	15.8907	17.1501	42.7829	41.982	58.4809	82.381
C1_11200W	C1_11200W	A0A1D8PF42 [1842-1854]	A0A1D8PF42 1xPhospho [S/Y]	Uncharacterized protein	-0.709502	0.0194387	0.254314	0.983255	57.9304	70.2606	41.8414	36.1629	87.5596	65.5353	69.6382	85.547
C1_11200W	C1_11200W	A0A1D8PF42 [2210-2219]	A0A1D8PF42 1xPhospho [S]	Uncharacterized protein	-2.7387	0.768469	2.26598	5.77315	5.67469	0	0	0	19.8066	11.2973	34.7666	18.9212
C1_11200W	C1_11200W	A0A1D8PF42 [495-502]	A0A1D8PF42 1xPhospho [S]	Uncharacterized protein	-2.32985	-0.844668	0.237971	1.72316	44.7555	44.7299	4.57758	12.4204	71.405	34.3075	34.0809	24.3408
C1_11200W	C1_11200W	A0A1D8PF42 [686-704]	A0A1D8PF42 1xPhospho [S]	Uncharacterized protein	-1.53409	-2.48622	1.9794	1.02728	10.8991	0	2.15332	0.955386	29.3526	16.569	3.61612	3.75816
C1_11200W	C1_11200W	A0A1D8PF42 [125-158]	A0A1D8PF42 1xPhospho [S]	Uncharacterized protein	-1.30526	-1.27347	0.940726	0.972517	256.187	153.856	80.3002	85.0279	437.394	350.601	140.033	185.346
C1_11200W	C1_11200W	A0A1D8PF42 [67-88]	A0A1D8PF42 1xPhospho [S]	Uncharacterized protein	-1.16779	-0.0160206	0.000435258	1.1522	494.813	563.197	225.87	244.499	602.76	455.571	526.901	519.731
C1_11200W	C1_11200W	A0A1D8PF42 [1972-2009]	A0A1D8PF42 1xPhospho [S]	Uncharacterized protein	-0.0729918	-0.613574	-0.205995	-0.746577	676.859	215.273	415.265	432.804	426.573	346.72	198.83	306.229
C1_11200W	C1_11200W	A0A1D8PF42 [1205-1217]	A0A1D8PF42 1xPhospho [S1208]	Uncharacterized protein	1.31234	-3.93642	3.93642	-1.31234	0	0	0	1.48344	11.0534	3.2568	0	0							ATNRSATSTESNYDS
C1_11200W	C1_11200W	A0A1D8PF42 [1261-1274]	A0A1D8PF42 1xPhospho [S1267]	Uncharacterized protein	-2.08899	-1.35922	1.93999	2.66977	22.1089	0	4.43161	0	56.4999	31.1697	14.5492	19.0136							KENEVDDSLIEDAEK
C1_11200W	C1_11200W	A0A1D8PF42 [1434-1448]	A0A1D8PF42 1xPhospho [S1434]	Uncharacterized protein	-3.99782	-4.27468	0.27686	0	7.79821	7.17768	0	0	18.3557	0	0	0							GDFNETKSVDPVGVA
C1_11200W	C1_11200W	A0A1D8PF42 [1890-1903]	A0A1D8PF42 1xPhospho [S1893]	Uncharacterized protein	-4.55074	-1.94944	1.73735	4.33866	61.8864	43.1072	0	3.52241	213.792	138.615	50.0178	40.4853							QQDKNIESVEEVSAA
C1_11200W	C1_11200W	A0A1D8PF42 [1958-1971]	A0A1D8PF42 1xPhospho [S1968]	Uncharacterized protein	0	-4.22348	4.22348	0	0	0	0	0	11.5037	6.17695	0	0			Y				PEGLTNQSASKDIPS
C1_11200W	C1_11200W	A0A1D8PF42 [2112-2128]	A0A1D8PF42 1xPhospho [S2119]	Uncharacterized protein	-0.0954008	1.51067	0.46569	2.07176	0	9.67215	4.79364	4.19562	7.87688	5.86112	16.4972	24.4976			Y				QDTETSTSDDEIFVN
C1_11200W	C1_11200W	A0A1D8PF42 [2202-2207]	A0A1D8PF42 1xPhospho [S2205]	Uncharacterized protein	-0.995546	-6.51055	0.885765	-4.62924	33.1553	15.1881	14.3924	9.35562	84.7706	5.40331	0	0			Y				QGAKSLESPKHKDAI
C1_11200W	C1_11200W	A0A1D8PF42 [2272-2284]	A0A1D8PF42 1xPhospho [S2274]	Uncharacterized protein	-1.23881	-4.65604	1.90291	-1.51431	28.2673	5.78893	7.68393	6.17018	76.3593	53.7398	2.54788	1.652							QSSSRAISDAGTGHQ
C1_11200W	C1_11200W	A0A1D8PF42 [2443-2457]	A0A1D8PF42 1xPhospho [S2444]	Uncharacterized protein	-1.33625	-0.450394	0.058351	0.944204	539.45	611.042	231.057	223.991	626.957	571.063	427.514	448.98							TTQANKGSPLGGLAS
C1_11200W	C1_11200W	A0A1D8PF42 [21-41]	A0A1D8PF42 1xPhospho [S33]	Uncharacterized protein	-0.46401	-1.07368	0.807837	0.198169	7.5439	2.76846	4.45148	2.74963	12.1215	6.68176	3.61949	4.78916							PNSSSKTSAPSASAS
C1_11200W	C1_11200W	A0A1D8PF42 [503-510]	A0A1D8PF42 1xPhospho [S505]	Uncharacterized protein	-1.11568	-2.79676	1.13046	-0.550614	405.499	113.66	126.403	112.636	765.833	371.945	78.6837	84.1977	Y						SDLEKKISETDARIR
C1_11200W	C1_11200W	A0A1D8PF42 [613-626]	A0A1D8PF42 1xPhospho [S620]	Uncharacterized protein	2.108	-4.73773	4.73773	-2.108	0	0	0	3.31093	16.9657	8.71513	0	0			Y				ENQTSTLSENAPTRE
C1_11200W	C1_11200W	A0A1D8PF42 [747-754]	A0A1D8PF42 1xPhospho [S753]	Uncharacterized protein	-3.28928	-4.08094	0.791668	0	5.26123	3.51499	0	0	13.1731	2.75025	0	0							KTGYHDGSKNDLSKE
C1_11200W	C1_11200W	A0A1D8PF42 [865-875]	A0A1D8PF42 1xPhospho [S871]	Uncharacterized protein	-3.68951	-5.55014	1.86063	0	6.73282	5.16905	0	0	27.2274	18.628	0	0							KAETERDSSTLKQSG
C1_11200W	C1_11200W	A0A1D8PF42 [876-893]	A0A1D8PF42 1xPhospho [S890]	Uncharacterized protein	0.137311	-1.78684	1.38205	-0.542102	11.1263	7.20982	14.1244	6.14258	48.0772	1.3203	8.23523	5.37026		Y					STDSETSSPSKGYLA
C1_11200W	C1_11200W	A0A1D8PF42 [918-931]; [1115-1128]	A0A1D8PF42 1xPhospho [S924]; 1xPhospho [S1121]	Uncharacterized protein	-1.96965	-1.08093	0.557581	1.4463	73.1375	62.5757	18.3098	15.5951	126.016	74.1986	44.2649	49.8542							KENDVDDSLIEDAEK
C1_11200W	C1_11200W	A0A1D8PF42 [159-167]	A0A1D8PF42 1xPhospho [T/S]	Uncharacterized protein	-0.786271	-2.67796	1.98951	0.0978126	27.2878	28.7347	15.9035	16.1605	160.532	64.9046	20.7299	13.6535
C1_11200W	C1_11200W	A0A1D8PF42 [1294-1307]	A0A1D8PF42 1xPhospho [T1296]	Uncharacterized protein	-0.668244	-0.290421	-0.375747	0.00207574	21.0003	15.5725	11.2416	11.4019	13.3462	14.6113	9.56175	13.1158	Y						KDQLKKETTLSHDAT
C1_11200W	C1_11200W	A0A1D8PF42 [305-316]	A0A1D8PF42 1xPhospho [Y/S]	Uncharacterized protein	2.29249	-0.950428	4.56041	1.31749	0	0	0	3.89901	15.329	7.26599	4.89624	6.31366
C1_11200W	C1_11200W	A0A1D8PF42 [1192-1204]	A0A1D8PF42 2xPhospho [S/T]	Uncharacterized protein	-2.46502	-6.32367	1.62488	-2.23377	24.9702	0	3.7036	0	56.7686	22.3278	0	0
C1_11200W	C1_11200W	A0A1D8PF42 [1988-2009]	A0A1D8PF42 2xPhospho [S/T]	Uncharacterized protein	3.44885	-5.96377	4.7903	-4.62232	98.7263	104.227	1669.29	556.801	3386.81	2255.77	37.6466	51.7769
C1_11200W	C1_11200W	A0A1D8PF42 [67-88]	A0A1D8PF42 2xPhospho [S]	Uncharacterized protein	3.23205	-4.0562	4.0562	-3.23205	0	0	8.39602	0	10.7412	4.8944	0	0
C1_11200W	C1_11200W	A0A1D8PF42 [125-158]	A0A1D8PF42 2xPhospho [S156; T/S]	Uncharacterized protein	0	-4.19478	4.19478	0	0	0	0	0	11.1145	6.19837	0	0							GASTGSGSPKTPSTP
C1_11200W	C1_11200W	A0A1D8PF42 [159-167]	A0A1D8PF42 2xPhospho [S161; T162]	Uncharacterized protein	0	-0.47641	0.47641	0	0	0	0	0	0.391278	0	0	0			Y		Y		SGSPKTPSTPRENKS	GSPKTPSTPRENKST
C1_11210C	HAP43	A0A1D8PF19 [45-57]	A0A1D8PF19 1xPhospho [S/Y]	Hap43p	0.808777	0.0699967	1.37518	0.636401	830.995	0	651.663	804.764	493.001	1664.2	956.4	1308.09
C1_11210C	HAP43	A0A1D8PF19 [12-32]	A0A1D8PF19 1xPhospho [S]	Hap43p	0.0386056	0.358118	-0.148024	0.171488	2283.07	4203.66	2620.65	4042.04	1192.63	4661.46	4347.02	3156.75
C1_11210C	HAP43	A0A1D8PF19 [172-185]	A0A1D8PF19 1xPhospho [S173]	Hap43p	0.0819414	-0.680687	0.896005	0.133377	2329.07	3746.47	2662.8	3767.86	2744.14	8562.73	2986.77	4066.85							QQLISKSSPAASTAS
C1_11210C	HAP43	A0A1D8PF19 [33-44]	A0A1D8PF19 1xPhospho [S36]	Hap43p	0.086792	-0.578937	1.08018	0.414447	844.052	997.542	739.406	1216.44	820.214	3074.57	1222.6	1384.46			Y				STPRSAASPPVSVNT
C1_11210C	HAP43	A0A1D8PF19 [352-386]	A0A1D8PF19 1xPhospho [T/S]	Hap43p	1.15305	0.976239	1.10912	0.932306	302.412	0	211.976	461.761	0	653.5	416.754	869.863
C1_11210C	HAP43	A0A1D8PF19 [12-32]	A0A1D8PF19 2xPhospho [S15; T/S]	Hap43p	-0.577424	-0.433169	-1.42407	-1.27982	495.237	905.551	331.928	606.493	126.464	394.924	385.898	0							IIPKQAPSPIAIAGS
C1_11240C	CHO1	A0A1D8PF32 [42-51]	A0A1D8PF32 1xPhospho [S]	CDP-diacylglycerol--serine O-phosphatidyltransferase (EC 2.7.8.8) (Phosphatidylserine synthase)	-0.972341	-0.687867	0.759219	1.04369	2.06111e+07	1.50194e+07	6.58323e+06	1.15768e+07	3.52715e+07	2.50357e+07	2.21736e+07	1.52634e+07
C1_11240C	CHO1	A0A1D8PF32 [41-51]	A0A1D8PF32 1xPhospho [S43]	CDP-diacylglycerol--serine O-phosphatidyltransferase (EC 2.7.8.8) (Phosphatidylserine synthase)	-0.364798	-20.0399	-0.496374	-20.1714	848540	672090	864848	316039	744043	333909	0	0	Y						PPLLRRSSSLFSLSS
C1_11240C	CHO1	A0A1D8PF32 [41-51]	A0A1D8PF32 2xPhospho [S43; S44]	CDP-diacylglycerol--serine O-phosphatidyltransferase (EC 2.7.8.8) (Phosphatidylserine synthase)	-22.4091	-1.09267	2.20945	23.5259	3.3141e+06	2.25535e+06	0	0	1.87918e+07	6.96686e+06	8.15901e+06	3.91899e+06	Y					Y	PPLLRRSSSLFSLSS	PLLRRSSSLFSLSSK
C1_11240C	CHO1	A0A1D8PF32 [42-51]	A0A1D8PF32 2xPhospho [S44; S]	CDP-diacylglycerol--serine O-phosphatidyltransferase (EC 2.7.8.8) (Phosphatidylserine synthase)	-0.126285	-0.427524	2.79418	2.49294	2391502	0	2.19106e+06	0	8.79531e+06	7.79301e+06	6.95244e+06	5.38159e+06						Y	PLLRRSSSLFSLSSK
C1_11240C	CHO1	A0A1D8PF32 [41-51]	A0A1D8PF32 3xPhospho [S43; S44; S47]	CDP-diacylglycerol--serine O-phosphatidyltransferase (EC 2.7.8.8) (Phosphatidylserine synthase)	0	-1.33308	22.4577	21.1246	0	0	0	0	4.84685e+06	913272	1.34556e+06	940741	Y					Y	PPLLRRSSSLFSLSS	PLLRRSSSLFSLSSK	RRSSSLFSLSSKDDL
C1_11250W	C1_11250W	Q59W48 [126-148]	Q59W48 1xPhospho [S/T]	Microtubule-binding protein	-0.563086	-0.446696	0.547156	0.663546	1.37403e+07	1.14606e+07	4.67402e+06	1.23832e+07	1.80609e+07	1.87626e+07	1.27584e+07	1.42598e+07
C1_11250W	C1_11250W	Q59W48 [122-148]	Q59W48 1xPhospho [S/T]	Microtubule-binding protein	0.0939694	0.0346714	0.722296	0.662998	1.78526e+07	1.69239e+07	1.72382e+07	1.98789e+07	3.18402e+07	2.55343e+07	3.01574e+07	2.86125e+07
C1_11250W	C1_11250W	Q59W48 [162-177]	Q59W48 1xPhospho [S164]	Microtubule-binding protein	1.13214	1.06029	-0.177041	-0.248893	532112	823472	873603	2.09762e+06	845274	353761	1.21535e+06	1.28506e+06	Y						PIGSRKTSSNGPINL
C1_11250W	C1_11250W	Q59W48 [163-177]	Q59W48 1xPhospho [T/S]	Microtubule-binding protein	-0.864894	-0.177463	0.24658	0.934011	3.76094e+06	5.27944e+06	1.75808e+06	3.20587e+06	6.37632e+06	4.34911e+06	3.99342e+06	5.49061e+06
C1_11250W	C1_11250W	Q59W48 [154-162]	Q59W48 1xPhospho [T/S]	Microtubule-binding protein	-0.238861	-1.37561	1.09771	-0.0390426	9488874	5.92181e+06	7.34467e+06	5.71457e+06	1.66774e+07	1.63037e+07	6.77635e+06	5.93422e+06
C1_11250W	C1_11250W	Q59W48 [122-148]	Q59W48 2xPhospho [T128; S]	Microtubule-binding protein	-0.18006	-0.586652	1.76201	1.35541	499153	1.78143e+06	0	2.013e+06	3.64058e+06	4.09447e+06	0	5.15066e+06							KQTTKPTTSSPGSSP
C1_11250W	C1_11250W	Q59W48 [126-148]	Q59W48 2xPhospho [T128; S]	Microtubule-binding protein	0.319553	0.959318	1.19353	1.83329	6489917	5.1092e+06	6.01348e+06	8.46157e+06	1.80621e+07	8.46637e+06	2.37017e+07	2.788e+07							KQTTKPTTSSPGSSP
C1_11280W	CWC2	Q59W50 [344-363]	Q59W50 1xPhospho [S358]	Pre-mRNA-splicing factor CWC2	10.2007	0	0	-10.2007	0	0	1175.88	0	0	0	0	0							NLLVDYSSDEDDDXX
C1_11280W	CWC2	Q59W50 [5-18]	Q59W50 1xPhospho [S6]	Pre-mRNA-splicing factor CWC2	-11.0111	-1.46877	1.18215	10.7245	2062.83	0	0	0	3934.39	747.727	810.368	880.594	Y						XXMSRKVSISSLTLS
C1_11280W	CWC2	Q59W50 [344-363]	Q59W50 2xPhospho [Y/S]	Pre-mRNA-splicing factor CWC2	-1.63693	-4.1158	1.66915	-0.80973	9634.38	39800.2	1898.53	13996	105080	52136.6	4428.5	4638.71
C1_11320C	C1_11320C	A0A1D8PF49 [64-76]	A0A1D8PF49 1xPhospho [S]	Uncharacterized protein	5.56299	5.69227	1.3805	1.50978	322169	454722	3.60161e+07	711112	1.38519e+06	637513	4.88477e+07	5.5739e+07
C1_11320C	C1_11320C	A0A1D8PF49 [65-76]	A0A1D8PF49 1xPhospho [S]	Uncharacterized protein	6.92328	4.58742	2.48278	0.146917	4826.74	1886.35	806733	8163.52	36611.7	917.321	581225	321029
C1_11320C	C1_11320C	A0A1D8PF49 [64-76]	A0A1D8PF49 2xPhospho [S/Y]	Uncharacterized protein	6.78394	5.14718	2.10305	0.466296	17686.4	13995.8	3.46653e+06	24854.6	100148	35967.6	2.05494e+06	2.76861e+06
C1_11330C	SMT3	Q59W54 [2-19]	Q59W54 1xAcetyl [N-Term]; 1xPhospho [S/T]	SUMO family protein	0	-1.52629	10.704	9.1777	0	0	0	0	1091.27	575.837	312.26	265.854
C1_11330C	SMT3	Q59W54 [2-22]	Q59W54 1xAcetyl [N-Term]; 1xPhospho [S/T]	SUMO family protein	0.832109	-4.66977	2.85672	-2.64516	118776	42532.7	124337	162840	575659	592815	24049.5	21856.4
C1_11330C	SMT3	Q59W54 [2-19]	Q59W54 1xAcetyl [N-Term]; 2xPhospho [S10; T]	SUMO family protein	0.14353	-3.65682	3.25682	-0.543534	38408.2	13619.1	41286.1	16183.6	236275	261046	20695.3	18733.7			Y				DTENTGGSPPAAEAG
C1_11330C	SMT3	Q59W54 [2-22]	Q59W54 1xAcetyl [N-Term]; 2xPhospho [T4; S10]	SUMO family protein	8.39922	-3.06406	12.0887	0.625445	0	0	336.612	0	2529.31	1825.52	519.83	0			Y				XXXXMSDTENTGGSP	DTENTGGSPPAAEAG
C1_11330C	SMT3	Q59W54 [1-19]	Q59W54 1xPhospho [S/T]	SUMO family protein	-0.475496	-0.718339	1.12388	0.881037	1548.74	995.411	634.699	1194.82	3713.22	1832.48	1890.93	1479.33
C1_11330C	SMT3	Q59W54 [57-66]	Q59W54 1xPhospho [S/T]	SUMO family protein	0.224315	-4.33114	1.96451	-2.59094	1205.19	893.719	1106.17	1345.99	4420.56	3773.98	175.151	231.019
C1_11330C	SMT3	Q59W54 [2-19]	Q59W54 1xPhospho [S/T]	SUMO family protein	0.578362	-2.74761	2.22668	-1.09929	172814	37156.9	164634	148885	568979	413806	87151.2	59181.8
C1_11330C	SMT3	Q59W54 [1-19]	Q59W54 1xPhospho [S2]	SUMO family protein	0.437538	-9.50494	2.31326	-7.62921	145.187	0	82.3964	114.584	488.197	237.363	0	0							XXXXXXMSDTENTGG
C1_11330C	SMT3	Q59W54 [58-66]	Q59W54 1xPhospho [S61]	SUMO family protein	5.70194	-7.52414	7.52414	-5.70194	0	0	32.1756	18.8785	183.074	0	0	0							FAKRQGTSPDTMRFL
C1_11330C	SMT3	Q59W54 [2-19]	Q59W54 2xPhospho [S/T]	SUMO family protein	0.296739	-3.37391	3.38146	-0.289192	47935.4	18745.2	56963.5	24944.9	380671	314234	32223.8	34806.6
C1_11330C	SMT3	Q59W54 [1-19]	Q59W54 2xPhospho [S10; S/T]	SUMO family protein	-0.540192	-1.51333	1.99796	1.02482	147.078	0	100.831	0	224.122	366.356	0	206.195			Y				DTENTGGSPPAAEAG
C1_11330C	SMT3	Q59W54 [1-19]	Q59W54 2xPhospho [S10; T/S]	SUMO family protein	-1.37882	-0.733556	0.71425	1.35952	1292.3	745.888	329.267	453.869	1897.56	1447	1159.28	851.804			Y				DTENTGGSPPAAEAG
C1_11330C	SMT3	Q59W54 [2-22]	Q59W54 2xPhospho [S10; T]	SUMO family protein	7.72193	-10.6458	10.6458	-7.72193	0	0	127.942	82.18	1016.78	584.325	0	0			Y				DTENTGGSPPAAEAG
C1_11350C	TOS4	A0A1D8PF67 [326-340]	A0A1D8PF67 1xPhospho [S/T]	Tos4p	0.301503	-0.439003	0.955818	0.215312	349644	43837.8	256377	228561	660042	103188	471025	91966.5
C1_11350C	TOS4	A0A1D8PF67 [347-355]	A0A1D8PF67 1xPhospho [S349]	Tos4p	-14.2564	-4.30063	4.49139	14.4472	12956.3	6613.46	0	0	419502	20697.1	22336.3	0							NIKRKATSEEPQVKK
C1_11350C	TOS4	A0A1D8PF67 [278-283]	A0A1D8PF67 1xPhospho [T278]	Tos4p	0.114039	-1.54554	0.719997	-0.939581	604920	82545.7	336589	407423	964216	168163	337050	50866.2		Y			Y		VSLTLPKTPLKPKPK
C1_11350C	TOS4	A0A1D8PF67 [326-340]	A0A1D8PF67 2xPhospho [S/T]	Tos4p	0	-0.254751	15.9591	15.7043	0	0	0	0	57166.6	6535.16	47087.4	6302.88
C1_11350C	TOS4	A0A1D8PF67 [321-340]	A0A1D8PF67 2xPhospho [S/T]	Tos4p	1.71759	-0.00553829	2.23387	0.51075	100730	30104.2	196664	233634	553209	62233.7	517299	95785.1
C1_11360W	RPL37B	A0A1D8PF45 [15-21]	A0A1D8PF45 1xPhospho [S/T]	Ribosomal protein L37	-0.797131	0.141268	1.59982	2.53822	1047.58	810.308	398.207	670.571	4930.28	703.116	3382.13	2830.89
C1_11400C	GIN4	Q59W62 [418-433]	Q59W62 1xPhospho [S/T]	Serine/threonine-protein kinase GIN4 (EC 2.7.11.1) (Growth inhibitory protein 4)	-1.13597	-0.635186	-0.373935	0.126852	622.832	687.029	143.761	451.717	359.283	651.275	471.292	179.007
C1_11400C	GIN4	Q59W62 [633-643]	Q59W62 1xPhospho [S/T]	Serine/threonine-protein kinase GIN4 (EC 2.7.11.1) (Growth inhibitory protein 4)	-1.08737	-0.120699	0.318453	1.28512	2181.31	1393.25	561.675	1120.06	1318.26	3139.44	2192.42	1907.43
C1_11400C	GIN4	Q59W62 [467-476]	Q59W62 1xPhospho [S/T]	Serine/threonine-protein kinase GIN4 (EC 2.7.11.1) (Growth inhibitory protein 4)	-0.196373	1.58525	0.58887	2.3705	1482.34	816.757	595.805	1410.59	1633.46	1825.04	5961.79	4417.81
C1_11400C	GIN4	Q59W62 [459-466]	Q59W62 1xPhospho [S]	Serine/threonine-protein kinase GIN4 (EC 2.7.11.1) (Growth inhibitory protein 4)	-1.00138	-2.09549	0.996621	-0.0974813	3499.36	1076.51	878.233	1407.01	4213.86	4917.48	1447.9	687.969
C1_11400C	GIN4	Q59W62 [1071-1086]	Q59W62 1xPhospho [S]	Serine/threonine-protein kinase GIN4 (EC 2.7.11.1) (Growth inhibitory protein 4)	-0.732278	-0.312567	-1.64954	-1.22983	94687.4	73829.3	35822.5	65616.2	23141.5	30571	24552.8	18696.8
C1_11400C	GIN4	Q59W62 [434-446]	Q59W62 1xPhospho [S]	Serine/threonine-protein kinase GIN4 (EC 2.7.11.1) (Growth inhibitory protein 4)	1.91747	0.067902	1.8261	-0.0234745	1586.92	3621.12	10982.4	8694.27	9953.14	8515.88	9364.23	9994.88
C1_11400C	GIN4	Q59W62 [1071-1086]	Q59W62 1xPhospho [S1078]	Serine/threonine-protein kinase GIN4 (EC 2.7.11.1) (Growth inhibitory protein 4)	1.89539	0.0471469	1.82435	-0.0238873	149.746	0	230.613	329.196	226.921	305.944	292.823	257.777							SMVSDESSASDDVFD
C1_11400C	GIN4	Q59W62 [1192-1197]	Q59W62 1xPhospho [S1193]	Serine/threonine-protein kinase GIN4 (EC 2.7.11.1) (Growth inhibitory protein 4)	-0.633733	-1.55036	0.57078	-0.345852	579.521	147.34	241.017	227.094	390.01	690.102	0	368.117	Y						GSFFRKLSWGSKKTI
C1_11400C	GIN4	Q59W62 [291-302]	Q59W62 1xPhospho [S300]	Serine/threonine-protein kinase GIN4 (EC 2.7.11.1) (Growth inhibitory protein 4)	-0.434283	-0.0595814	-0.397654	-0.0229524	675.432	396.596	332.899	460.208	344.233	469.294	399.789	380.784							MSNEDLISEKSLPHP
C1_11400C	GIN4	Q59W62 [364-377]	Q59W62 1xPhospho [S374]	Serine/threonine-protein kinase GIN4 (EC 2.7.11.1) (Growth inhibitory protein 4)	0.191085	-2.55608	2.32842	-0.418745	449.295	58.4847	276.574	303.261	787.842	1766.53	252.728	180.78		Y					EDNTNNNSPKKSTSF
C1_11400C	GIN4	Q59W62 [455-462]	Q59W62 1xPhospho [S459]	Serine/threonine-protein kinase GIN4 (EC 2.7.11.1) (Growth inhibitory protein 4)	0.179575	-9.19649	1.84301	-7.53306	162.538	0	0	184.215	336.121	249.584	0	0							PYRSPYRSPYKSPSK
C1_11400C	GIN4	Q59W62 [468-476]	Q59W62 1xPhospho [S473]	Serine/threonine-protein kinase GIN4 (EC 2.7.11.1) (Growth inhibitory protein 4)	1.3442	-2.15338	2.44828	-1.0493	2011.38	714.793	3787.82	3135.18	2413.57	12469.4	1501.02	1843.67		Y					KRYSYNQSPTKSPYG
C1_11400C	GIN4	Q59W62 [477-482]	Q59W62 1xPhospho [S477]	Serine/threonine-protein kinase GIN4 (EC 2.7.11.1) (Growth inhibitory protein 4)	-0.800086	-4.58236	1.52775	-2.25452	173.3	39.7268	61.9891	59.9298	109.565	506.55	0	24.7596							YNQSPTKSPYGRRSN
C1_11400C	GIN4	Q59W62 [483-495]	Q59W62 1xPhospho [S485]	Serine/threonine-protein kinase GIN4 (EC 2.7.11.1) (Growth inhibitory protein 4)	-0.557507	0.564772	-0.529189	0.59309	3185.51	2036.44	961.094	2586.77	2149.13	1469.08	2524.88	2827.49						Y	PYGRRSNSQRQFENE
C1_11400C	GIN4	Q59W62 [570-576]	Q59W62 1xPhospho [S572]	Serine/threonine-protein kinase GIN4 (EC 2.7.11.1) (Growth inhibitory protein 4)	-1.99965	0.766797	0.428471	3.19492	1559.49	2315.91	498.199	470.138	286.757	4929.13	5391.27	3484.21	Y						ISSGKRNSIIGKNNN
C1_11400C	GIN4	Q59W62 [603-609]	Q59W62 1xPhospho [S605]	Serine/threonine-protein kinase GIN4 (EC 2.7.11.1) (Growth inhibitory protein 4)	0.0671409	-1.47568	0.170555	-1.37226	1549.43	758.623	742.719	1675.34	1460.82	1137.01	0	933.445	Y						TTGLKRNSITMKLLS
C1_11400C	GIN4	Q59W62 [700-706]	Q59W62 1xPhospho [S703]	Serine/threonine-protein kinase GIN4 (EC 2.7.11.1) (Growth inhibitory protein 4)	0.583622	7.54382	-10.0251	-3.06489	245.81	795.152	440.085	1120.41	0	0	97.8658	87.7356			Y				QKRRSILSSKKLSII
C1_11400C	GIN4	Q59W62 [700-705]	Q59W62 1xPhospho [S703]	Serine/threonine-protein kinase GIN4 (EC 2.7.11.1) (Growth inhibitory protein 4)	0.584424	0.109654	-0.263689	-0.738459	404.914	164.071	265.35	588.309	190.972	282.801	250.123	261.141			Y				QKRRSILSSKKLSII
C1_11400C	GIN4	Q59W62 [713-730]	Q59W62 1xPhospho [S720]	Serine/threonine-protein kinase GIN4 (EC 2.7.11.1) (Growth inhibitory protein 4)	-0.463262	0.100902	-0.381873	0.18229	13746.7	8552.51	7024.34	9149.96	6951.58	10161.5	9686.37	8666.48							NDADPNNSEQELVDE
C1_11400C	GIN4	Q59W62 [766-774]	Q59W62 1xPhospho [S767]	Serine/threonine-protein kinase GIN4 (EC 2.7.11.1) (Growth inhibitory protein 4)	-1.74632	0.128034	-1.32138	0.552971	465.141	2066.8	283.363	470.61	740.538	272.023	645.754	460.869	Y						VENLKRRSASQPVPK
C1_11400C	GIN4	Q59W62 [392-399]	Q59W62 1xPhospho [T/S]	Serine/threonine-protein kinase GIN4 (EC 2.7.11.1) (Growth inhibitory protein 4)	-0.628243	-2.30259	2.06809	0.393742	7010.89	1788.31	2404.89	3287.52	13690.8	23210.2	4402.12	3076.86
C1_11400C	GIN4	Q59W62 [981-997]	Q59W62 1xPhospho [T]	Serine/threonine-protein kinase GIN4 (EC 2.7.11.1) (Growth inhibitory protein 4)	-0.880063	-1.39489	1.19777	0.682941	1879.82	965.299	796.979	748.44	2350.43	4177.12	1636.6	845.041
C1_11400C	GIN4	Q59W62 [776-783]	Q59W62 1xPhospho [T778]	Serine/threonine-protein kinase GIN4 (EC 2.7.11.1) (Growth inhibitory protein 4)	0.465107	0.0219011	-0.790666	-1.23387	253.169	207.237	171.93	464.003	265.728	0	269.808	0							PVPKRRQTPVLTRRP
C1_11400C	GIN4	Q59W62 [467-476]	Q59W62 2xPhospho [S/T]	Serine/threonine-protein kinase GIN4 (EC 2.7.11.1) (Growth inhibitory protein 4)	-0.077871	-0.863312	0.371796	-0.413645	1675.61	1060	900.295	1691.52	1307.01	2233.07	1096.17	849.324
C1_11400C	GIN4	Q59W62 [1071-1086]	Q59W62 2xPhospho [S]	Serine/threonine-protein kinase GIN4 (EC 2.7.11.1) (Growth inhibitory protein 4)	0.156608	1.51496	-0.81655	0.541798	1193.12	492.827	930.182	949.193	0	956.843	1501.99	1234.43
C1_11400C	GIN4	Q59W62 [392-399]	Q59W62 2xPhospho [S393; T397]	Serine/threonine-protein kinase GIN4 (EC 2.7.11.1) (Growth inhibitory protein 4)	-0.323918	-0.472564	-0.638429	-0.787075	1592.3	1913.96	1261.07	1539.88	654.528	1597.58	1092.11	530.664			Y				VRSGSKYSLNGTPRR	SKYSLNGTPRRKRAS
C1_11400C	GIN4	Q59W62 [434-446]	Q59W62 2xPhospho [S439; S443]	Serine/threonine-protein kinase GIN4 (EC 2.7.11.1) (Growth inhibitory protein 4)	-0.232753	-1.49868	1.97855	0.712627	467.542	161.109	276.55	258.29	812.434	1668	526.075	351.05							ARHSVASSANNSPRK	VASSANNSPRKSPYK
C1_11400C	GIN4	Q59W62 [981-997]	Q59W62 2xPhospho [T992; Y/T]	Serine/threonine-protein kinase GIN4 (EC 2.7.11.1) (Growth inhibitory protein 4)	-8.92647	-2.24934	1.52492	8.20205	485.558	0	0	0	513.981	885.194	293.486	0							EPEYETETDGEDKVS
C1_11400C	GIN4	Q59W62 [429-446]	Q59W62 4xPhospho [S435; S438; S439; S443]	Serine/threonine-protein kinase GIN4 (EC 2.7.11.1) (Growth inhibitory protein 4)	-1.34387	-0.285421	-0.668546	0.389905	555.653	478.224	113.101	293.601	281.433	368.65	290.943	242.272			Y				RNSVARHSVASSANN	VARHSVASSANNSPR	ARHSVASSANNSPRK	VASSANNSPRKSPYK
C1_11410C	C1_11410C	A0A1D8PF40 [25-33]	A0A1D8PF40 1xPhospho [T29]	Uncharacterized protein	-0.209504	-0.886413	1.45482	0.777912	4799609	2.71914e+06	3.41641e+06	3.08606e+06	1.68324e+07	3.77814e+06	6.71891e+06	4.43054e+06							IKKKAANTTSSKLKS
C1_11420W	KRR1	Q59W63 [343-354]	Q59W63 1xPhospho [S350]	KRR1 small subunit processome component (KRR-R motif-containing protein 1)	-1.32344	1.15291	-0.253653	2.22269	1400	2715.93	624.298	1019.75	2725.23	726.926	3018.27	4659.22							SHDDEDHSPEPKKSK
C1_11430W	C1_11430W	A0A1D8PF44 [294-305]	A0A1D8PF44 1xPhospho [S/T]	Uncharacterized protein	0.316148	-21.5099	0.00946166	-21.8166	1.70967e+06	1.25708e+06	1.58203e+06	2.11158e+06	1.44752e+06	1.53875e+06	0	0
C1_11430W	C1_11430W	A0A1D8PF44 [296-305]	A0A1D8PF44 1xPhospho [S298]	Uncharacterized protein	0.582303	-1.01505	0.274127	-1.32322	11947427	4.95424e+06	1.30619e+07	1.22439e+07	1.06752e+07	9.76338e+06	4.56352e+06	5.54972e+06						Y	TTRGRSNSLPTTSTK
C1_11430W	C1_11430W	A0A1D8PF44 [306-316]	A0A1D8PF44 1xPhospho [S308]	Uncharacterized protein	0.248565	-1.38993	-1.54199	-3.18049	1.77362e+07	5.37269e+07	2.59735e+07	5.89265e+07	1.4177e+07	1.03642e+07	5.69684e+06	3.66768e+06							TTSTKDNSVPDNDFL
C1_11440C	GIN1	A0A1D8PF47 [995-1012]	A0A1D8PF47 1xPhospho [S]	Chromatin-modulating protein	0.264776	0.546119	-0.595446	-0.314103	107016	84597	90677.1	139537	72315	54501.9	127120	58052.8
C1_11440C	GIN1	A0A1D8PF47 [1080-1098]	A0A1D8PF47 1xPhospho [S1085]	Chromatin-modulating protein	0.25512	1.32804	-2.50983	-1.43691	9012.84	2935.04	3465.67	10793.5	2096.94	0	5266.1	0							SRIQHGISDGEEDID
C1_11440C	GIN1	A0A1D8PF47 [328-336]	A0A1D8PF47 1xPhospho [S329]	Chromatin-modulating protein	-0.262804	0.392878	-1.14169	-0.486007	188378	178604	104668	201199	100556	65770.6	144033	74355							VEEILKSSPFTSPVK
C1_11440C	GIN1	A0A1D8PF47 [369-382]	A0A1D8PF47 1xPhospho [S373]	Chromatin-modulating protein	0.359994	0.0967068	0.327977	0.0646897	24177.1	19418.5	20778.6	35173.2	26329.1	28394.5	33132.4	25385.4							LKKQLFSSPQGQTDT
C1_11440C	GIN1	A0A1D8PF47 [391-409]	A0A1D8PF47 1xPhospho [S396]	Chromatin-modulating protein	1.10748	1.26768	0.76791	0.928102	5608.75	0	6297	5789.31	5109.93	4441.36	11766.6	11231.7							KKLINLDSDSDIDLA
C1_11440C	GIN1	A0A1D8PF47 [804-820]	A0A1D8PF47 1xPhospho [S812]	Chromatin-modulating protein	-0.692245	4.42125	-3.26223	1.85126	32039	0	15553.9	4274.3	0	3338.35	63150.5	8395.18							EEEEENDSDDPEEIQ
C1_11440C	GIN1	A0A1D8PF47 [804-821]	A0A1D8PF47 1xPhospho [S812]	Chromatin-modulating protein	-0.00911479	0.803967	-0.123003	0.690078	67045.9	28188.7	31249.5	63385.3	60578.9	26872.4	100801	51881.1							EEEEENDSDDPEEIQ
C1_11440C	GIN1	A0A1D8PF47 [850-864]	A0A1D8PF47 1xPhospho [S859]	Chromatin-modulating protein	-1.55859	-0.777082	-0.424185	0.357322	41507.5	21811.2	7152.27	14342.7	33559.3	13629.3	19245	8291.28							VEGEAEESEDEWKGL
C1_11440C	GIN1	A0A1D8PF47 [865-883]	A0A1D8PF47 1xPhospho [S879]	Chromatin-modulating protein	0.0801561	0.521443	-1.0845	-0.643213	220345	171022	149839	263889	114926	69624.6	177142	87760.9							EFSDVVNSDDEKMID
C1_11440C	GIN1	A0A1D8PF47 [87-111]	A0A1D8PF47 1xPhospho [S96]	Chromatin-modulating protein	-0.12073	-0.202238	-0.600782	-0.68229	119508	42409	53984.2	94934.2	70756.1	36010.9	66041.4	26760.5							LLGGGDASDEDENTN
C1_11440C	GIN1	A0A1D8PF47 [89-111]	A0A1D8PF47 1xPhospho [S96]	Chromatin-modulating protein	0.698059	-0.395253	-1.5496	-2.64291	612460	232833	560875	810462	169089	119667	134013	85543.9							LLGGGDASDEDENTN
C1_11440C	GIN1	A0A1D8PF47 [1016-1040]	A0A1D8PF47 2xPhospho [S1018; T/S]	Chromatin-modulating protein	1.46054	-0.931509	1.31438	-1.07767	4697.75	0	5886.88	7043.61	8398.42	3286.13	3854.66	2271.19	Y						NKGEKKNSGSETDKD
C1_11440C	GIN1	A0A1D8PF47 [314-327]	A0A1D8PF47 2xPhospho [S318; S/T]	Chromatin-modulating protein	0.022826	1.11711	-1.04489	0.0493893	18750.8	18408.2	9276	28475.6	12660.6	5349.17	28490.3	10576.1							TTKDKPPSSPTVEEI
C1_11440C	GIN1	A0A1D8PF47 [328-336]	A0A1D8PF47 2xPhospho [S329; T/S]	Chromatin-modulating protein	-12.4487	-12.1949	-0.253803	0	5589.26	0	0	0	2925.44	1762.01	0	0							VEEILKSSPFTSPVK
C1_11440C	GIN1	A0A1D8PF47 [995-1012]	A0A1D8PF47 2xPhospho [S998; T/S]	Chromatin-modulating protein	-0.205488	-0.325639	-0.686458	-0.806609	40062.5	86246.3	27008.7	82531.8	51492	26993	33599	29027.6							EVIKIDDSDDSDIEV
C1_11540C	CTA3	A0A1D8PF53 [2-11]	A0A1D8PF53 1xAcetyl [N-Term]; 1xPhospho [S/T]	Cta3p	-0.751428	-0.293752	0.680857	1.13853	2294.14	2231.72	1113.37	1574.65	3919.49	3336.47	2965.51	2953.56
C1_11540C	CTA3	A0A1D8PF53 [2-11]	A0A1D8PF53 1xAcetyl [N-Term]; 2xPhospho [T7; S]	Cta3p	-0.0473152	9.68621	-7.04725	2.68628	131.261	0	126.994	0	0	0	340.6	482.235							XMSISSSTPTFKVGL
C1_11540C	CTA3	A0A1D8PF53 [521-541]	A0A1D8PF53 1xPhospho [S/T]	Cta3p	-0.6898	0.327159	0.520281	1.53724	1230.21	729.277	498.528	715.856	1822	988.8	1607.81	1918.7
C1_11540C	CTA3	A0A1D8PF53 [882-899]	A0A1D8PF53 1xPhospho [S/T]	Cta3p	0.29844	-2.84818	1.65244	-1.49419	176.824	122.346	246.921	121.233	733.606	209.022	130.042	0
C1_11540C	CTA3	A0A1D8PF53 [885-899]	A0A1D8PF53 1xPhospho [S/T]	Cta3p	0.467709	-4.07631	2.81067	-1.73335	542.88	276.043	577.226	555.656	3568.42	2183.24	340.018	0
C1_11540C	CTA3	A0A1D8PF53 [885-923]	A0A1D8PF53 1xPhospho [S/T]	Cta3p	0.546125	0.31275	0.130231	-0.103144	364.756	539.613	594.892	726.091	717.552	272.346	566.791	662.978
C1_11540C	CTA3	A0A1D8PF53 [569-594]	A0A1D8PF53 1xPhospho [S/Y/T]	Cta3p	0.590266	1.92522	-0.916568	0.418385	3463.87	9206.96	7773.18	11303.6	4273.72	2438.41	9970.54	15524.6
C1_11540C	CTA3	A0A1D8PF53 [1239-1253]	A0A1D8PF53 1xPhospho [S/Y]	Cta3p	0.866251	-0.187683	1.66071	0.606778	826.335	1701.35	1720.31	2888.28	5964.01	2030	3318.32	3700.41
C1_11540C	CTA3	A0A1D8PF53 [568-594]	A0A1D8PF53 1xPhospho [S]	Cta3p	-1.09443	0.910051	0.118948	2.12343	184.264	167.288	57.8807	106.227	250.974	130.877	238.324	480.097
C1_11540C	CTA3	A0A1D8PF53 [505-519]	A0A1D8PF53 1xPhospho [S]	Cta3p	-0.309293	1.14622	0.123916	1.57943	440.658	577.816	424.225	397.528	843.464	266.445	1227.41	1230.4
C1_11540C	CTA3	A0A1D8PF53 [1056-1082]	A0A1D8PF53 1xPhospho [S]	Cta3p	-0.262232	-1.97581	1.24388	-0.469704	2012.34	1273.06	680.974	2058.21	6008.1	1774.2	782.382	1195.34
C1_11540C	CTA3	A0A1D8PF53 [1029-1042]	A0A1D8PF53 1xPhospho [S]	Cta3p	-0.188852	-0.737875	1.46351	0.914485	169.93	46.8854	0	190.091	448.528	151.16	191.838	167.348
C1_11540C	CTA3	A0A1D8PF53 [1086-1104]	A0A1D8PF53 1xPhospho [S]	Cta3p	1.74097	0.760055	0.645091	-0.335821	258.744	411.936	883.035	1361.12	675.141	374.259	1022.3	755.612
C1_11540C	CTA3	A0A1D8PF53 [1021-1028]	A0A1D8PF53 1xPhospho [S1026]	Cta3p	-2.51153	1.68988	-0.759132	3.44227	55.2667	410.521	47.1243	33.7363	179.504	95.2982	457.671	431.149							ERQHLEGSDKGSSSF
C1_11540C	CTA3	A0A1D8PF53 [1105-1133]	A0A1D8PF53 1xPhospho [S1111]	Cta3p	-6.19194	0.939041	1.44093	8.57192	72.1072	0	0	0	93.1476	104.336	87.0882	292.455			Y				RAQSTRDSNFDDFDF
C1_11540C	CTA3	A0A1D8PF53 [1243-1253]	A0A1D8PF53 1xPhospho [S1245]	Cta3p	2.25152	-9.10644	3.49322	-7.86473	47.9493	0	74.8867	157.202	392.52	157.683	0	0							RDPPRYESPPTAQPT
C1_11540C	CTA3	A0A1D8PF53 [2-11]	A0A1D8PF53 1xPhospho [S2]	Cta3p	-0.835906	3.30559	-2.82814	1.31335	102.714	463.62	102.081	214.757	78.8885	0	423.531	365.357							XXXXXXMSISSSTPT
C1_11540C	CTA3	A0A1D8PF53 [411-429]	A0A1D8PF53 1xPhospho [S413]	Cta3p	0.0344403	0.143702	0.407011	0.516273	4074.1	1530.58	2798.39	2941.72	4861.32	2570.45	3915.29	4294.97							QQQQRQVSDIQNSSV
C1_11540C	CTA3	A0A1D8PF53 [466-478]	A0A1D8PF53 1xPhospho [S468]	Cta3p	-0.180365	0.704879	0.0920136	0.977257	6696.4	5055.57	3213.72	7157.04	8654.19	3871.79	8659	11759.1							ELVQRASSSDLSHAE
C1_11540C	CTA3	A0A1D8PF53 [489-504]	A0A1D8PF53 1xPhospho [S492]	Cta3p	-0.759344	-1.03658	0.909135	0.6319	178.797	151.412	28.4818	166.185	372.094	248.889	302.206	0							GSFKPTSSFGQSLMQ
C1_11540C	CTA3	A0A1D8PF53 [531-541]	A0A1D8PF53 1xPhospho [S533]	Cta3p	-0.213456	-1.30471	1.1765	0.0852508	1597.18	798.469	1107.69	958.339	4955.9	460.185	1323.4	868.463							STGERAVSPQPQQQQ
C1_11540C	CTA3	A0A1D8PF53 [239-260]	A0A1D8PF53 1xPhospho [T256]	Cta3p	1.99957	0.937733	2.27306	1.21122	47.5258	0	79.7522	113.294	233.548	0	189.248	259.033							PAIAAQNTSQSRQVS
C1_11540C	CTA3	A0A1D8PF53 [634-645]	A0A1D8PF53 1xPhospho [T640]	Cta3p	4.73258	-0.752256	8.86482	3.37998	0	0	25.5857	0	418.065	47.1401	0	275.774			Y				KSLTSQTTNLHEKKT
C1_11540C	CTA3	A0A1D8PF53 [505-519]	A0A1D8PF53 2xPhospho [S]	Cta3p	-0.759946	-0.70369	0.97881	1.03507	904.863	719.125	294.195	664.39	2419.67	781.924	818.821	1146.57
C1_11540C	CTA3	A0A1D8PF53 [2-11]	A0A1D8PF53 2xPhospho [S2; T7]	Cta3p	-7.56449	-0.426018	0.854324	7.9928	120.999	67.2964	0	0	192.401	148.828	146.37	107.355							XXXXXXMSISSSTPT	XMSISSSTPTFKVGL
C1_11540C	CTA3	A0A1D8PF53 [568-594]	A0A1D8PF53 2xPhospho [S570; Y/S/T]	Cta3p	-0.869801	-0.248147	2.51097	3.13263	108.875	0	0	59.1262	461.677	163.618	185.574	340.752	Y						PSLQKRDSAPVPGAV
C1_11540C	CTA3	A0A1D8PF53 [1056-1082]	A0A1D8PF53 3xPhospho [Y1059; T1072; S]	Cta3p	-6.34125	0	-6.34125	0	0	80.0786	0	0	0	0	0	0							PPIRELDYQESDSSD	SDDGEDQTFDDAVDS
C1_11590W	PLD1	A0A1D8PF62 [2-25]	A0A1D8PF62 1xPhospho [S/T]	Phospholipase (EC 3.1.4.4)	0.436804	-0.0176667	-0.392343	-0.846814	1197.76	1640.98	1466.19	2376.69	1252.64	909.931	1381.29	754.952
C1_11590W	PLD1	A0A1D8PF62 [1-25]	A0A1D8PF62 1xPhospho [S/T]	Phospholipase (EC 3.1.4.4)	0.749016	0.0873578	-0.667124	-1.32878	3893.34	5364.12	6398.63	9160.57	3283.58	2546.04	3005.45	3188.13
C1_11590W	PLD1	A0A1D8PF62 [1614-1642]	A0A1D8PF62 1xPhospho [S/T]	Phospholipase (EC 3.1.4.4)	1.79425	0.603816	2.86826	1.67782	163.908	0	281.583	289.377	578.642	624.493	753.97	1074.99
C1_11590W	PLD1	A0A1D8PF62 [410-421]	A0A1D8PF62 1xPhospho [S]	Phospholipase (EC 3.1.4.4)	0.481337	-0.36515	1.32102	0.474528	5405.84	4074.8	6755.49	6480.23	10084.7	13603.4	9640.68	8750.26
C1_11590W	PLD1	A0A1D8PF62 [1504-1522]	A0A1D8PF62 1xPhospho [S1519]	Phospholipase (EC 3.1.4.4)	-0.00816558	-6.09991	3.61309	-2.47866	325.534	115.784	347.128	91.694	2524.67	2886.64	0	77.9091							GQSAENYSDEKVEAG
C1_11590W	PLD1	A0A1D8PF62 [1542-1555]	A0A1D8PF62 1xPhospho [S1546]	Phospholipase (EC 3.1.4.4)	-0.600432	-1.32752	1.24856	0.521465	2725.07	3118.39	1647.43	2206.32	7110.9	6774.75	3278.3	2253.86							LEKIDEASEDEYGLL
C1_11590W	PLD1	A0A1D8PF62 [107-122]	A0A1D8PF62 2xPhospho [S115; S119]	Phospholipase (EC 3.1.4.4)	-6.81423	-3.2294	2.27533	5.86015	111.535	0	0	0	368.66	175.13	57.0874	0							SRYDEDRSQGQSLGK	EDRSQGQSLGKSKYP
C1_11590W	PLD1	A0A1D8PF62 [1614-1642]	A0A1D8PF62 2xPhospho [S1621; S/T]	Phospholipase (EC 3.1.4.4)	0	-1.79738	9.30664	7.50927	0	0	0	0	283.73	348.526	0	181.186							TSTEEEESEESGTPT
C1_11590W	PLD1	A0A1D8PF62 [385-405]	A0A1D8PF62 2xPhospho [S395; S397]	Phospholipase (EC 3.1.4.4)	0.996481	-0.238693	1.38397	0.148794	205.621	0	206.407	204.829	275.852	262.399	221.646	234.377							PDINDNHSLSPVPSA	INDNHSLSPVPSALS
C1_11590W	PLD1	A0A1D8PF62 [385-405]	A0A1D8PF62 2xPhospho [S395; S397]	Phospholipase (EC 3.1.4.4)	1.32013	-9.74118	2.49296	-8.56835	151.031	0	127.434	251.169	437.624	417.205	0	0							PDINDNHSLSPVPSA	INDNHSLSPVPSALS
C1_11590W	PLD1	A0A1D8PF62 [410-421]	A0A1D8PF62 2xPhospho [T/S]	Phospholipase (EC 3.1.4.4)	-1.10072	-1.34853	1.21826	0.970448	1333.21	1754.33	598.538	840.603	3494.34	3690.67	1813.14	1007.74
C1_11650W	EGD1	Q59TU0 [128-152]	Q59TU0 1xPhospho [S/T]	Nascent polypeptide-associated complex subunit beta (NAC-beta) (Beta-NAC)	-0.611252	-5.51963	0.386893	-4.52149	22.3624	11.7215	6.21683	15.7501	44.8749	0	0	0
C1_11650W	EGD1	Q59TU0 [115-127]	Q59TU0 1xPhospho [T125]	Nascent polypeptide-associated complex subunit beta (NAC-beta) (Beta-NAC)	0.701125	-2.36789	2.12095	-0.948068	36.7116	33.1752	23.3114	90.9345	253.944	53.3993	29.5966	29.1384							EQIQAGKTPKDFNTG
C1_11690W	C1_11690W	Q59TU4 [1-9]	Q59TU4 1xAcetyl [N-Term]; 1xPhospho [S/Y]	GATA-type domain-containing protein	-0.31023	-0.517424	0.380045	0.172851	8925851	1.84919e+07	5.93786e+06	1.6175e+07	1.6044e+07	1.96371e+07	9.44723e+06	1.54802e+07
C1_11690W	C1_11690W	Q59TU4 [117-141]	Q59TU4 1xPhospho [S]	GATA-type domain-containing protein	1.77183	20.1354	-20.5236	-2.16002	1507353	0	1.64142e+06	3.50598e+06	0	0	0	1.15175e+06
C1_11690W	C1_11690W	Q59TU4 [116-141]	Q59TU4 1xPhospho [S118]	GATA-type domain-containing protein	-1.56348	-20.7812	-0.611369	-19.8291	0	2.75308e+06	0	931457	1.13604e+06	666062	0	0	Y						NKPTRRSSSQSSASS
C1_11690W	C1_11690W	Q59TU4 [23-32]	Q59TU4 1xPhospho [T23]	GATA-type domain-containing protein	-0.580353	1.2489	-0.286418	1.54283	32314323	5.5016e+07	2.42037e+07	3.42028e+07	3.86337e+07	3.29715e+07	4.68888e+07	1.23288e+08			Y				TTSSTTKTPPLEMGL
C1_11690W	C1_11690W	Q59TU4 [23-32]	Q59TU4 1xPhospho [T23]	GATA-type domain-containing protein	0.0151551	-0.160512	0.182757	0.0070893	3.14107e+06	3.1963e+06	3.0818e+06	3.32249e+06	4.90679e+06	2.28644e+06	3.06253e+06	3.37331e+06			Y				TTSSTTKTPPLEMGL
C1_11690W	C1_11690W	Q59TU4 [117-141]	Q59TU4 2xPhospho [S/T]	GATA-type domain-containing protein	-0.889935	-0.161974	-0.291764	0.436198	1.03737e+06	1.781e+06	580790	940112	1.20647e+06	1.09586e+06	1.26281e+06	795019
C1_11700C	MRF1	Q59TU5 [68-87]	Q59TU5 1xPhospho [T/S]	Mrf1p	0	-3.72346	11.0995	7.37608	0	0	0	0	1524.55	668.748	0	165.12
C1_11730W	C1_11730W	A0A1D8PF82 [294-306]	A0A1D8PF82 1xPhospho [S/T]	TPR_REGION domain-containing protein	0.419647	-0.333344	0.158488	-0.594503	6.99772e+06	9.74319e+06	1.06943e+07	1.16984e+07	1.12849e+07	7.39988e+06	6.61905e+06	8.21098e+06
C1_11730W	C1_11730W	A0A1D8PF82 [308-319]	A0A1D8PF82 1xPhospho [S309]	TPR_REGION domain-containing protein	-0.833753	0	-21.9907	-21.1569	2.08226e+06	2.08495e+06	0	2.33809e+06	0	0	0	0	Y						NHASKRNSYINVNES
C1_11730W	C1_11730W	A0A1D8PF82 [307-319]	A0A1D8PF82 1xPhospho [S309]	TPR_REGION domain-containing protein	0.544641	-0.248446	-0.746586	-1.53967	7.37185e+06	4.94638e+06	8.83832e+06	9.12976e+06	2.8999e+06	4.44191e+06	4.1114e+06	2.06896e+06	Y						NHASKRNSYINVNES
C1_11730W	C1_11730W	A0A1D8PF82 [453-459]	A0A1D8PF82 1xPhospho [S455]	TPR_REGION domain-containing protein	-0.59234	-0.233941	-1.46725	-1.10885	5730450	2.8098e+06	1.40724e+06	4.25721e+06	2.06882e+06	1.01994e+06	1.86526e+06	761145							GALGRHISDYTKYLF
C1_11730W	C1_11730W	A0A1D8PF82 [526-542]	A0A1D8PF82 1xPhospho [S540]	TPR_REGION domain-containing protein	1.23417	0.293001	-0.671759	-1.61293	3093277	3.51734e+06	7.55797e+06	7.99322e+06	2.8857e+06	1.26406e+06	2.41802e+06	2.6662e+06			Y				ASIQSGGSLKFTVAD
C1_11730W	C1_11730W	A0A1D8PF82 [678-689]	A0A1D8PF82 1xPhospho [S680]	TPR_REGION domain-containing protein	-1.2678	-0.243134	-0.808595	0.216075	3.81318e+06	6.00702e+06	2.26745e+06	1.8108e+06	3.84761e+06	1.75911e+06	2.7e+06	2.03716e+06	Y						PKANKRSSVPVYTSQ
C1_11730W	C1_11730W	A0A1D8PF82 [526-542]	A0A1D8PF82 2xPhospho [S540; T/S]	TPR_REGION domain-containing protein	0.171859	-1.7297	0.133518	-1.76804	0	4.2038e+06	502137	4.23348e+06	3.50692e+06	1.1045e+06	1.39041e+06	0			Y				ASIQSGGSLKFTVAD
C1_11730W	C1_11730W	A0A1D8PF82 [294-306]	A0A1D8PF82 2xPhospho [T/S]	TPR_REGION domain-containing protein	0.726109	-0.205775	0.0970329	-0.834851	6.52031e+06	7.47982e+06	1.22227e+07	1.09359e+07	8.46386e+06	6.51028e+06	7.17574e+06	5.80793e+06
C1_11740W	C1_11740W	Q59TV1 [382-394]	Q59TV1 1xPhospho [T388]	Uncharacterized protein	20.1165	-1.20924	24.395	3.06923	0	0	0	1.13678e+06	8.90851e+06	1.31525e+07	4.99235e+06	4.54892e+06							RQLNYEPTPEPDKAX
C1_11750W	AVT4	A0A1D8PF84 [22-35]	A0A1D8PF84 1xPhospho [S]	Avt4p	0.961758	-1.1536	0.394887	-1.72047	169596	166532	451183	203488	269603	172351	106770	91888.7
C1_11750W	AVT4	A0A1D8PF84 [134-146]	A0A1D8PF84 1xPhospho [S136]	Avt4p	0.863855	-1.97168	0.596776	-2.23876	19813.8	16451.8	39666.5	26333.9	39131.9	15714.3	1773.04	12209.6							PLLKKSRSCDSIGGN
C1_11750W	AVT4	A0A1D8PF84 [179-187]	A0A1D8PF84 1xPhospho [T181]	Avt4p	-0.938305	-3.16181	2.21709	-0.00641738	724.463	1279.18	1045.11	0	5816.17	3503.47	0	1040.47							LESLRTTTPNFLTKN
C1_11750W	AVT4	A0A1D8PF84 [22-35]	A0A1D8PF84 2xPhospho [S/Y]	Avt4p	0.155267	-1.24483	-0.440009	-1.8401	32725.9	27811.3	41503	25913	23738.7	20884.7	10082.9	8745.79
C1_11750W	AVT4	A0A1D8PF84 [134-146]	A0A1D8PF84 2xPhospho [S139; S]	Avt4p	-0.264025	-2.71547	1.83917	-0.612275	7592.21	4834.32	4511.22	5836.94	30179.5	14285.8	4103.99	2665.06			Y				KKSRSCDSIGGNSIK
C1_11770C	C1_11770C	A0A1D8PF76 [496-526]	A0A1D8PF76 1xPhospho [S/T]	ApbA_C domain-containing protein	-1.98264	-0.510359	-1.6615	-0.189216	189408	33848.4	31473.8	25015.2	28763.7	41809.3	23313.3	26232.1
C1_11770C	C1_11770C	A0A1D8PF76 [946-964]	A0A1D8PF76 1xPhospho [S]	ApbA_C domain-containing protein	-1.99648	2.58197	-2.7654	1.81305	58353.8	7621.99	10201.9	6331.55	3789.72	5912.66	35072.5	23026
C1_11770C	C1_11770C	A0A1D8PF76 [563-573]	A0A1D8PF76 1xPhospho [S566]	ApbA_C domain-containing protein	-2.83045	-1.40902	-1.84897	-0.427538	408165	94597.5	30604.5	40077.2	70583.1	68978.4	27000	25553.6							IQQKPQNSPVTHVQR
C1_11770C	C1_11770C	A0A1D8PF76 [496-526]	A0A1D8PF76 2xPhospho [S508; T/S]	ApbA_C domain-containing protein	-3.3955	-0.966358	-1.77785	0.651284	10192.2	0	427.161	540.484	1498.42	1473.09	791.325	728.996			Y				VNNTSPVSIPAQQPT
C1_11860W	C1_11860W	A0A1D8PF90 [79-99]	A0A1D8PF90 1xPhospho [S/T]	Uncharacterized protein	-1.95359	-6.49538	0.210475	-4.33132	35.6811	41.2923	7.59286	11.5378	71.3166	17.904	0	0
C1_11860W	C1_11860W	A0A1D8PF90 [59-78]	A0A1D8PF90 1xPhospho [S]	Uncharacterized protein	-0.215467	-0.194801	0.540101	0.560766	798.275	1157.86	806.33	878.283	1368.16	1476.65	1365.51	1119.85
C1_11860W	C1_11860W	A0A1D8PF90 [59-78]	A0A1D8PF90 1xPhospho [S61]	Uncharacterized protein	0.0452262	-0.435822	0.832366	0.351318	121.282	115.716	143.689	100.888	227.684	195.096	145.209	167.08							LGGKKSASPVISNTG
C1_11860W	C1_11860W	A0A1D8PF90 [1182-1190]	A0A1D8PF90 1xPhospho [T/S]	Uncharacterized protein	-0.257742	-3.09178	3.63287	0.798828	12.79	35.5937	9.60911	30.6952	451.862	159.749	0	70.8566
C1_11860W	C1_11860W	A0A1D8PF90 [83-99]	A0A1D8PF90 1xPhospho [T/S]	Uncharacterized protein	0.0424899	-0.022305	0.896276	0.831481	314.023	240.558	307.485	263.702	666.021	367.057	489.786	527.428
C1_11860W	C1_11860W	A0A1D8PF90 [215-244]	A0A1D8PF90 1xPhospho [T]	Uncharacterized protein	0.226573	0.238213	-0.258668	-0.247029	1892.79	1864.79	2046.65	2350.08	1724.16	1416.48	1936.87	1767.79
C1_11860W	C1_11860W	A0A1D8PF90 [1012-1018]	A0A1D8PF90 1xPhospho [T1013]	Uncharacterized protein	1.78872	1.83244	0.982136	1.02586	7.77497	8.25338	26.8269	31.0075	26.2415	6.3961	34.6771	84.1197							ESTVVKITGLPDKID
C1_11860W	C1_11860W	A0A1D8PF90 [2-11]	A0A1D8PF90 1xPhospho [T3]	Uncharacterized protein	1.9677	-1.1434	2.17692	-0.934182	8.8895	0	14.2865	23.3958	24.7629	18.9562	10.5173	8.72668							XXXXXMPTPAEIIAA
C1_11860W	C1_11860W	A0A1D8PF90 [59-78]	A0A1D8PF90 2xPhospho [S59; T/S]	Uncharacterized protein	0	-0.379855	5.73815	5.3583	0	0	0	0	27.655	24.7222	20.5741	19.447							PTLGGKKSASPVISN
C1_11860W	C1_11860W	A0A1D8PF90 [83-99]	A0A1D8PF90 2xPhospho [S87; T]	Uncharacterized protein	-1.17129	-0.461766	1.92118	2.63071	45.0582	77.7254	8.11859	45.8443	277.05	190.76	177.527	161.874			Y				PVRSSTASPVPTPVQ
C1_11860W	C1_11860W	A0A1D8PF90 [79-99]	A0A1D8PF90 2xPhospho [T85; S]	Uncharacterized protein	-0.13892	-1.13568	1.56314	0.566381	187.592	366.534	230.567	272.598	1057.42	581.954	460.802	284.767						Y	KTPVRSSTASPVPTP
C1_11870W	MUP1	Q5A3J0 [2-15]	Q5A3J0 1xPhospho [S]	Mup1p	14.0965	-5.39463	22.4443	2.95309	0	0	17517	0	5.70129e+06	5586.67	74440.4	61218.8
C1_11900C	C1_11900C	Q5A3J3 [19-50]	Q5A3J3 1xPhospho [S19]	Smg4_UPF3 domain-containing protein	0.75859	-0.157271	-6.19748	-7.11335	50251.7	9.0176e+06	6.89299e+06	8.44833e+06	64932.4	58626	63005.5	47791.7							APGILSKSPSLSSTT
C1_11900C	C1_11900C	Q5A3J3 [359-369]	Q5A3J3 1xPhospho [T/S]	Smg4_UPF3 domain-containing protein	-7.88062	-9.81085	1.93023	0	234.67	0	0	0	897.173	0	0	0
C1_11920W	C1_11920W	Q5A3J5 [257-279]	Q5A3J5 1xPhospho [S/T]	Uncharacterized protein	-0.435566	-2.95319	0.257107	-2.26052	11248.1	0	816.516	7500.13	6422.75	7019.86	1029.97	704.904
C1_11920W	C1_11920W	Q5A3J5 [204-225]	Q5A3J5 1xPhospho [S209]	Uncharacterized protein	-1.41135	-1.71196	-0.718002	-1.01862	34709.6	25809.2	5998.28	16753.8	22701.3	14090	3644.21	7585.43							DKELEEISGEDVEPE
C1_11920W	C1_11920W	Q5A3J5 [248-256]	Q5A3J5 1xPhospho [S251]	Uncharacterized protein	-1.79721	0.174585	-1.3264	0.64539	10723.6	25293.2	2360.44	8002.01	6413.47	7948.05	7615.41	8593.7							IEEKDEHSPQLPRAP
C1_11920W	C1_11920W	Q5A3J5 [330-336]	Q5A3J5 1xPhospho [S333]	Uncharacterized protein	-0.787441	-3.66781	-0.193291	-3.07366	7979.13	4650.42	1571.31	5745.46	5505.82	5539.97	0	868.19		Y					GTQKKSDSPIKKPSA
C1_11930W	C1_11930W	A0A1D8PF97 [417-433]	A0A1D8PF97 1xPhospho [S/T]	PH domain-containing protein	-0.386989	-0.101148	0.00617931	0.29202	8324.33	8154.89	5981.72	6620.1	6914.3	9635.65	8431.74	6997.57
C1_11930W	C1_11930W	A0A1D8PF97 [584-603]	A0A1D8PF97 1xPhospho [S]	PH domain-containing protein	-1.26761	-1.19657	-0.81167	-0.740631	19230.9	28324.7	6149.84	13601.6	15087.9	12005.1	6714.17	5106.25
C1_11930W	C1_11930W	A0A1D8PF97 [638-663]	A0A1D8PF97 1xPhospho [S]	PH domain-containing protein	-1.14686	-1.82407	1.00244	0.325226	329.358	1110.4	0	649.656	1573.59	1311.8	0	814.181
C1_11930W	C1_11930W	A0A1D8PF97 [749-758]	A0A1D8PF97 1xPhospho [S]	PH domain-containing protein	-0.352805	0.151355	-0.474286	0.0298739	2988.08	5729.83	2465.62	4360.8	3945.59	2329.47	3374.29	3594.98
C1_11930W	C1_11930W	A0A1D8PF97 [444-462]	A0A1D8PF97 1xPhospho [S450]	PH domain-containing protein	0	-5.62739	5.62739	0	0	0	0	0	0	48.4325	0	0			Y				RSTSSSSSQPRQNQQ
C1_11930W	C1_11930W	A0A1D8PF97 [562-578]	A0A1D8PF97 1xPhospho [S568]	PH domain-containing protein	-1.82087	-2.37246	-0.539577	-1.09116	11458.6	13934.8	2557.72	4629.15	14002.3	3467.39	1474.99	1897.88							KDDDGLFSDDDDDDD
C1_11930W	C1_11930W	A0A1D8PF97 [720-725]	A0A1D8PF97 1xPhospho [S722]	PH domain-containing protein	-0.755648	-1.49058	1.08831	0.353385	1060.78	1208.88	513.629	830.237	2603.96	2223.03	1077.36	639.777		Y					NHIHRIHSPEKGSPL
C1_11930W	C1_11930W	A0A1D8PF97 [417-433]	A0A1D8PF97 2xPhospho [S/T]	PH domain-containing protein	-1.0515	0.0107646	-0.28018	0.78208	5330.67	5163.37	1713.78	3348.74	4614.62	4026.92	4451.96	4254.3
C1_11930W	C1_11930W	A0A1D8PF97 [637-663]	A0A1D8PF97 2xPhospho [Y/S]	PH domain-containing protein	-1.93442	-1.39087	0.191894	0.735443	608.133	975.06	130.071	283.397	1454.25	354.317	310.151	378.9
C1_11930W	C1_11930W	A0A1D8PF97 [638-663]	A0A1D8PF97 2xPhospho [Y/S]	PH domain-containing protein	-1.46032	-0.197781	-1.05769	0.204854	3248.08	8978.83	1487.68	2955.09	3500.53	2372.79	2707.52	2413.24
C1_11930W	C1_11930W	A0A1D8PF97 [417-433]	A0A1D8PF97 3xPhospho [S424; S428; S431]	PH domain-containing protein	-0.482227	0.513388	-0.727592	0.268023	316.171	1890.48	145.552	1433.84	694.657	637.565	490.315	1411.72			Y				GAVTSLSSPVTSTGS	SLSSPVTSTGSPRFA	SPVTSTGSPRFASGQ
C1_11940C	C1_11940C	Q5A3J9 [213-224]	Q5A3J9 1xPhospho [S]	Uncharacterized protein	0.00607363	0	-20.498	-20.5041	0	1.48087e+06	0	1.48712e+06	0	0	0	0
C1_11940C	C1_11940C	Q5A3J9 [198-207]	Q5A3J9 1xPhospho [S204]	Uncharacterized protein	0.210645	-0.566227	3.31995	2.54307	606415	1.02672e+06	1.40849e+06	481379	6.47227e+06	9.83666e+06	610918	1.04038e+07		Y					KNARNENSPIKKKPL
C1_11970C	C1_11970C	Q5A3K1 [104-114]	Q5A3K1 1xPhospho [S108]	Uncharacterized protein	0.791936	-0.920136	2.11099	0.398922	1.08041e+07	8.13256e+06	1.547e+07	1.73168e+07	4.16573e+07	4.0147e+07	1.99109e+07	2.33193e+07							NNKSVSTSPTTGIKS
C1_11970C	C1_11970C	Q5A3K1 [378-392]	Q5A3K1 1xPhospho [S389]	Uncharacterized protein	6.93209	-28.4932	7.1701	-28.2552	1.5649e+06	1.05865e+06	1.52664e+08	1.67709e+08	2.09248e+08	1.68588e+08	0	0		Y					EYTDNGSSPVKSSAL
C1_11970C	C1_11970C	Q5A3K1 [393-404]	Q5A3K1 1xPhospho [S401]	Uncharacterized protein	0.921922	-0.914449	0.990157	-0.846214	12672412	7.71725e+06	2.15269e+07	1.71041e+07	1.66443e+07	2.38577e+07	8.33221e+06	1.3156e+07							SALENNDSFGKNYND
C1_11970C	C1_11970C	Q5A3K1 [104-114]	Q5A3K1 2xPhospho [S108; S/T]	Uncharacterized protein	-0.637362	-0.874091	2.37719	2.14047	788032	721143	484512	485717	4.45758e+06	3.38297e+06	2.82916e+06	1.44863e+06							NNKSVSTSPTTGIKS
C1_11970C	C1_11970C	Q5A3K1 [378-392]	Q5A3K1 2xPhospho [S389; S/T]	Uncharacterized protein	2.49633	-2.77919	2.36712	-2.90839	2.08016e+06	0	5.96427e+06	5.77301e+06	5.66919e+06	5.06262e+06	791931	771413		Y					EYTDNGSSPVKSSAL
C1_11980W	NUT2	Q5A3K2 [2-17]	Q5A3K2 1xPhospho [T9]	Mediator of RNA polymerase II transcription subunit 10 (Mediator complex subunit 10)	-12.1229	-12.6737	0.550816	0	2636.01	1823.22	0	0	6532.85	0	0	0					Y		TTGALPSTPANEPLI
C1_12010C	KIP4	Q5A3K5 [880-890]	Q5A3K5 2xPhospho [S883; S]	Kip4p	2.80641	21.0584	-19.4702	-1.21821	0	726313	1.83818e+06	3.24267e+06	0	0	648530	1.5353e+06							KHRRNHSSSGGLNLK
C1_12030W	SER33	Q5A3K7 [2-40]	Q5A3K7 1xAcetyl [N-Term]; 1xPhospho [S]	D-3-phosphoglycerate dehydrogenase (EC 1.1.1.399) (EC 1.1.1.95)	0.60652	8.76359	-7.18634	0.970728	144.648	0	220.761	0	0	0	433.614	0
C1_12030W	SER33	Q5A3K7 [2-40]	Q5A3K7 1xAcetyl [N-Term]; 2xPhospho [T/S]	D-3-phosphoglycerate dehydrogenase (EC 1.1.1.399) (EC 1.1.1.95)	0.65425	0.0964335	-0.0106053	-0.568421	1205.65	3103.17	1647.14	5134.64	2599.51	1677.74	1499.79	3073.22
C1_12080W	LCB4	Q5A3L3 [2-20]	Q5A3L3 1xAcetyl [N-Term]; 1xPhospho [S]	Sphinganine kinase	1.36492	-1.63909	-5.17821	-8.18222	1.34634e+06	183706	2.71169e+06	1.22912e+06	19766.4	22490.5	5451.36	8114.92
C1_12120W	C1_12120W	Q5A3L7 [276-281]	Q5A3L7 1xPhospho [S280]	Protein kinase domain-containing protein	-0.185398	0.697571	-0.282939	0.600029	1.13275e+06	844001	784203	954166	1.62472e+06	0	1.60983e+06	1.0251e+06							TSKSIPRSKIESISQ
C1_12120W	C1_12120W	Q5A3L7 [27-32]	Q5A3L7 1xPhospho [S29]	Protein kinase domain-containing protein	-0.0404333	0.344709	0.56087	0.946012	2.14981e+06	2.59224e+06	2.29316e+06	2.31783e+06	3.71893e+06	3.27635e+06	4.6021e+06	4.28116e+06		Y					NNLDKKISPTRRKKV
C1_12130C	ZCF30	Q5A3L9 [780-787]	Q5A3L9 1xPhospho [T782]	Zcf30p	-0.13863	-23.495	2.34533	-21.011	2.32633e+06	0	1.32641e+06	786785	4.7349e+06	7.08701e+06	0	0							GASSKSTTPLPEKIS
C1_12160W	MSO1	Q5A3M2 [1-13]	Q5A3M2 1xAcetyl [N-Term]; 1xPhospho [S5]	Mso1p	0.0803612	11.2096	-11.6608	-0.531605	3236.86	0	1291.75	2130.58	0	0	2367.21	0							XXXMQHTSAGGGFFS
C1_12160W	MSO1	Q5A3M2 [111-137]	Q5A3M2 1xPhospho [S132]	Mso1p	11.2599	0	0	-11.2599	0	0	0	2451.23	0	0	0	0							NGSDRPNSGGYQRSS
C1_12170C	C1_12170C	Q5A3M3 [342-355]	Q5A3M3 1xPhospho [S]	Uncharacterized protein	-0.128204	0.562528	0.72176	1.41249	1.98844e+07	2.1367e+07	1.87706e+07	1.89733e+07	3.51371e+07	3.28945e+07	5.25583e+07	4.79145e+07
C1_12170C	C1_12170C	Q5A3M3 [342-355]	Q5A3M3 2xPhospho [S/T]	Uncharacterized protein	0	-21.909	21.909	0	0	0	0	0	1.83609e+06	2.10178e+06	0	0
C1_12180C	C1_12180C	Q5A3M4 [339-345]	Q5A3M4 1xPhospho [S343]	Uncharacterized protein	-1.47758	-0.0391482	-0.950865	0.487569	2044.32	2480.36	641.356	982.773	1389.54	950.695	1251.12	1026.44							ESRIPVFSPKSMIQD
C1_12230W	SNT1	A0A1D8PFD3 [238-254]	A0A1D8PFD3 1xPhospho [S240]	Snt1p	-1.42371	-1.83202	0.514205	0.105892	26.7289	0	9.33602	0	20.6695	17.9331	10.1232	0						Y	STNYRSTSGGGSGGD
C1_12230W	SNT1	A0A1D8PFD3 [302-310]	A0A1D8PFD3 1xPhospho [T306]	Snt1p	3.15002	-1.61553	5.50368	0.738128	0	0	7.8767	0	21.202	23.1683	10.3732	3.43325			Y				YNRSTLITPVDKELK
C1_12250C	C1_12250C	Q5A3N2 [418-431]	Q5A3N2 1xPhospho [S/T]	Uncharacterized protein	-1.36923	-1.72135	-0.868347	-1.22047	161388	185714	42220.1	92141.1	139995	50137.3	44896.8	12762.8
C1_12250C	C1_12250C	Q5A3N2 [418-431]	Q5A3N2 2xPhospho [T427; S428]	Uncharacterized protein	-0.93615	-2.08031	-1.64437	-2.78853	3952.08	3895.34	1174.18	2926.61	1921.24	588.36	369.803	222.862							DSVSHVNTSPLKASS	SVSHVNTSPLKASSF
C1_12290C	RBD1	A0A1D8PFE0 [12-39]	A0A1D8PFE0 1xPhospho [S17]	RHOMBOID-like protein (EC 3.4.21.-) (Rhomboid-like protein)	-8.23302	1.4154	-7.86938	1.77903	1388465	5.49679e+06	3814.47	19068.6	22972.3	6470.85	24332.8	54203.5							EKNTFNISDEDDDFP
C1_12290C	RBD1	A0A1D8PFE0 [12-26]	A0A1D8PFE0 1xPhospho [S17]	RHOMBOID-like protein (EC 3.4.21.-) (Rhomboid-like protein)	-7.42115	0.932032	-8.54687	-0.193687	1.85062e+07	2.98792e+07	153238	129071	93170.3	36203.9	118047	128795							EKNTFNISDEDDDFP
C1_12290C	RBD1	A0A1D8PFE0 [27-39]	A0A1D8PFE0 1xPhospho [S32]	RHOMBOID-like protein (EC 3.4.21.-) (Rhomboid-like protein)	-6.6571	1.18749	-8.92749	-1.0829	1.41936e+06	3.8949e+06	25794.6	26861.4	7133.7	3779.74	9506.85	15350.5							TRNLNESSPLTQSTK
C1_12320C	ATP19	A0A1D8PFD4 [33-45]	A0A1D8PFD4 1xPhospho [T/S]	F1F0 ATP synthase subunit k	-0.489743	-0.25141	0.422725	0.661059	3166.33	3348.23	2181.77	2457.29	4411.63	4321.2	3665.35	3670.72
C1_12350W	C1_12350W	Q5A3P1 [240-263]	Q5A3P1 1xPhospho [S/T]	Exosome catalytic subunit	0.300924	0.47311	0.0630173	0.235203	12916.3	16069.8	19436.8	16272.3	16073.4	14206.9	21062.6	20969.8
C1_12390C	RPL27A	A0A1D8PFG4 [94-111]	A0A1D8PFG4 1xPhospho [S]	60S ribosomal protein L27	-0.999893	-1.34183	0.890614	0.54868	719.755	353.303	191.418	344.651	1920.15	70.1171	425.323	359.272
C1_12390C	RPL27A	A0A1D8PFG4 [85-93]	A0A1D8PFG4 1xPhospho [S91]	60S ribosomal protein L27	-1.78123	-1.64529	0.913914	1.04985	573.909	624.997	167.889	180.206	1999.65	260.149	423.868	297.87							RYSLDVESFKSAVTS
C1_12410C	PKH2	Q5A3P6 [23-38]	Q5A3P6 1xPhospho [S]	Serine/threonine-protein kinase PKH2 (EC 2.7.11.1) (PKB-activating kinase homolog 2)	2.13891	-3.43624	3.55831	-2.01685	13292.9	3805.75	23511.8	51798.9	110886	90552	10912.4	7696.01
C1_12410C	PKH2	Q5A3P6 [106-122]	Q5A3P6 1xPhospho [S108]	Serine/threonine-protein kinase PKH2 (EC 2.7.11.1) (PKB-activating kinase homolog 2)	0.142499	-0.500944	-0.0937575	-0.737201	179106	104021	74645.5	237875	139051	126262	88819.1	98662.1							HVSSRLSSLGNTTNE
C1_12410C	PKH2	Q5A3P6 [21-38]	Q5A3P6 1xPhospho [S24]	Serine/threonine-protein kinase PKH2 (EC 2.7.11.1) (PKB-activating kinase homolog 2)	3.56271	-0.136171	3.04488	-0.653997	762.177	0	7377.68	1639.25	5006.12	1291.22	2754.61	2975.44							SSDKSKDSPISQNSN
C1_12410C	PKH2	Q5A3P6 [585-594]	Q5A3P6 1xPhospho [S587]	Serine/threonine-protein kinase PKH2 (EC 2.7.11.1) (PKB-activating kinase homolog 2)	1.05533	-12.7281	2.48015	-11.3033	1215.05	0	872.171	1654.01	3564.34	3219.65	0	0							PTPEKEPSPATINNK
C1_12410C	PKH2	Q5A3P6 [679-689]	Q5A3P6 1xPhospho [S681]	Serine/threonine-protein kinase PKH2 (EC 2.7.11.1) (PKB-activating kinase homolog 2)	0.457198	-0.392511	-0.114185	-0.963893	33338	26989.1	30244.3	52577.5	42524.4	13212	23122.7	19337.2							KTLTKVPSNIHQQQE
C1_12410C	PKH2	Q5A3P6 [806-811]	Q5A3P6 1xPhospho [S806]	Serine/threonine-protein kinase PKH2 (EC 2.7.11.1) (PKB-activating kinase homolog 2)	-0.30734	-1.65428	1.71769	0.370745	5090.98	2310.77	1843.28	4138.11	16402.4	7944.92	4814.33	2920.01			Y				PTSDSKKSMDIERSA
C1_12410C	PKH2	Q5A3P6 [577-594]	Q5A3P6 2xPhospho [S/T]	Serine/threonine-protein kinase PKH2 (EC 2.7.11.1) (PKB-activating kinase homolog 2)	2.41292	-2.28346	1.30059	-3.39579	10344.3	0	8595.42	46497.8	20743.3	4739.36	3455.83	1777.62
C1_12410C	PKH2	Q5A3P6 [21-38]	Q5A3P6 2xPhospho [S24; T/S]	Serine/threonine-protein kinase PKH2 (EC 2.7.11.1) (PKB-activating kinase homolog 2)	12.7367	-13.5909	13.5909	-12.7367	0	0	3057.02	3767.44	7513.85	4823.56	0	0							SSDKSKDSPISQNSN
C1_12430W	C1_12430W	A0A1D8PFD7 [74-90]	A0A1D8PFD7 1xPhospho [S]	CRIM domain-containing protein	0.23711	0.692565	0.238118	0.693572	2.12689e+06	2.61116e+06	3.1171e+06	2.46731e+06	2.0264e+06	3.56191e+06	4.12047e+06	4.91111e+06
C1_12430W	C1_12430W	A0A1D8PFD7 [539-546]	A0A1D8PFD7 1xPhospho [S544]	CRIM domain-containing protein	-22.7701	-3.0382	-0.609811	19.1221	3.81272e+06	3.34022e+06	0	0	4.6872e+06	0	570589	0							CKLPESNSIKDLDYL
C1_12450C	IRA2	A0A1D8PFE8 [606-621]	A0A1D8PFE8 1xPhospho [S613]	Ras GTPase activating protein	-13.7063	0.371449	-0.665346	13.4124	13365.6	0	0	0	3330.53	5096.61	7380.75	3521.33							NFTTSSSSVLSTSTY
C1_12450C	IRA2	A0A1D8PFE8 [606-621]	A0A1D8PFE8 2xPhospho [S613; S/T]	Ras GTPase activating protein	5.73645	-0.711668	-0.15393	-6.60205	6621.81	12192	989121	13976.2	4213.07	12696.7	8449.01	1875.92							NFTTSSSSVLSTSTY
C1_12450C	IRA2	A0A1D8PFE8 [2019-2026]	A0A1D8PFE8 2xPhospho [T2020; S2021]	Ras GTPase activating protein	21.7782	-1.35596	11.9542	-11.1799	0	0	3.57857e+06	17954.3	935.126	3031.92	888.008	661.204							LRLFCRLTSIYKDRI	RLFCRLTSIYKDRIP
C1_12520W	GSG1	A0A1D8PFH1 [133-150]	A0A1D8PFH1 1xPhospho [S]	Gsg1p	-0.391941	-1.48703	-0.629515	-1.7246	5.7225e+06	6.34296e+06	4.46463e+06	4.7305e+06	4.14879e+06	3.65025e+06	1.19309e+06	1.58918e+06
C1_12550C	CDC54	A0A1D8PFE6 [2-22]	A0A1D8PFE6 1xAcetyl [N-Term]; 1xPhospho [S/T]	DNA helicase (EC 3.6.4.12)	1.50197	1.1317	-0.26689	-0.637164	7325.27	11954.7	26742.9	27865.5	13479.7	2543.91	13083.2	22028.2
C1_12550C	CDC54	A0A1D8PFE6 [2-22]	A0A1D8PFE6 1xAcetyl [N-Term]; 2xPhospho [T8; S]	DNA helicase (EC 3.6.4.12)	1.20528	1.25525	-0.735793	-0.685823	3369.25	4011.07	8062.05	8956.97	3886.48	544.912	5988.4	4591.11							MSSPPQSTNQNNSNP
C1_12550C	CDC54	A0A1D8PFE6 [110-121]	A0A1D8PFE6 1xPhospho [S118]	DNA helicase (EC 3.6.4.12)	1.55202	-1.0082	1.71729	-0.842921	4741.03	2157.67	11001.5	9229.31	19869.9	2816.6	6424.31	4854.18		Y	Y				DVTDSVSSPQRSRRY
C1_12550C	CDC54	A0A1D8PFE6 [255-274]	A0A1D8PFE6 1xPhospho [S269]	DNA helicase (EC 3.6.4.12)	0	10.2177	0	10.2177	0	0	0	0	0	0	0	1189.8							NDANATTSPAQSKLD
C1_12550C	CDC54	A0A1D8PFE6 [110-121]	A0A1D8PFE6 2xPhospho [S118; S/T]	DNA helicase (EC 3.6.4.12)	8.89593	-11.0283	11.0283	-8.89593	0	0	475.366	0	1819.72	267.838	0	0		Y	Y				DVTDSVSSPQRSRRY
C1_12600C	CHR1	Q9Y7C4 [568-578]	Q9Y7C4 1xPhospho [S572]	ATP-dependent RNA helicase CHR1 (EC 3.6.4.13)	1.769	0.00392595	2.09129	0.326218	1714.33	803.272	4814.72	3768.1	9775.93	955.568	9392.34	1368.4							ESKQESHSNDEREEX
C1_12620W	SPA2	A0A1D8PFH4 [995-1007]	A0A1D8PFH4 1xPhospho [S/T]	Spa2p	0.150156	-0.0161583	-0.0877012	-0.254016	8414.81	5363.92	5385.02	9905.19	7049.28	5916.73	6606.65	6214.94
C1_12620W	SPA2	A0A1D8PFH4 [697-709]	A0A1D8PFH4 1xPhospho [S/T]	Spa2p	0.257345	-0.808453	0.879119	-0.18668	4137.66	5099.47	4029.02	7012.1	9867.71	7122.53	4455.68	5245.21
C1_12620W	SPA2	A0A1D8PFH4 [1056-1065]	A0A1D8PFH4 1xPhospho [S/T]	Spa2p	0.877684	-0.64238	1.20036	-0.319705	411.296	161.834	284.355	769.564	607.717	710.614	427.168	417.069
C1_12620W	SPA2	A0A1D8PFH4 [753-781]	A0A1D8PFH4 1xPhospho [S/Y]	Spa2p	-1.48714	-0.113156	-0.397008	0.976978	3231.08	4660.49	799.34	2015.09	4259.49	1733.38	2950.32	2590.4
C1_12620W	SPA2	A0A1D8PFH4 [1272-1291]	A0A1D8PFH4 1xPhospho [S/Y]	Spa2p	-0.503189	-0.171811	0.462033	0.79341	735.62	754.031	550.806	499.916	1205.38	846.961	947.062	874.748
C1_12620W	SPA2	A0A1D8PFH4 [180-193]	A0A1D8PFH4 1xPhospho [S]	Spa2p	-0.368682	-4.21637	3.47883	-0.36886	521.956	148.744	257.382	261.842	3108.5	4379.2	235.356	166.503
C1_12620W	SPA2	A0A1D8PFH4 [389-419]	A0A1D8PFH4 1xPhospho [S]	Spa2p	-0.282246	0.0477596	0.341598	0.671603	5061.5	3351.93	3566.64	3351.63	5370.61	5290.82	4895.35	6124.97
C1_12620W	SPA2	A0A1D8PFH4 [219-240]	A0A1D8PFH4 1xPhospho [S]	Spa2p	0.21718	-0.273851	0.670498	0.179466	2913.39	2346.22	3156.41	2957.85	4053.31	4318.61	3873.31	3051.01
C1_12620W	SPA2	A0A1D8PFH4 [1008-1019]	A0A1D8PFH4 1xPhospho [S]	Spa2p	0.394093	-0.20782	1.59828	0.996368	327.823	377.932	437.888	489.869	1425.79	713.135	932.122	919.723
C1_12620W	SPA2	A0A1D8PFH4 [996-1007]	A0A1D8PFH4 1xPhospho [S]	Spa2p	1.36131	-0.719489	1.55265	-0.52815	2867.16	1423.53	4928.43	6096.72	6426.97	6161.94	3722.04	3922.97
C1_12620W	SPA2	A0A1D8PFH4 [1028-1044]	A0A1D8PFH4 1xPhospho [S1031]	Spa2p	1.42747	-0.401463	3.12202	1.29309	367.586	0	328.877	661.526	2224.12	983.822	1290.86	1137.6		Y					DKVKQFESPQREDVP
C1_12620W	SPA2	A0A1D8PFH4 [1028-1045]	A0A1D8PFH4 1xPhospho [S1042]	Spa2p	0	8.59582	0	8.59582	0	0	0	0	0	0	130.978	254.922		Y	Y				EDVPSSPSPRKSPGQ
C1_12620W	SPA2	A0A1D8PFH4 [1097-1121]	A0A1D8PFH4 1xPhospho [S1110]	Spa2p	-2.35283	-0.987431	-0.263771	1.10163	1390.06	423.252	123.972	230.2	871.68	638.476	323.62	437.569							AAETSTLSDTSTSSS
C1_12620W	SPA2	A0A1D8PFH4 [1160-1175]	A0A1D8PFH4 1xPhospho [S1171]	Spa2p	-1.06645	0.830532	-2.63959	-0.74261	8919.94	33064	7048.56	12998	4352.79	2383.7	5536.18	6444.38							SQSDATISDNEKQND
C1_12620W	SPA2	A0A1D8PFH4 [1176-1203]	A0A1D8PFH4 1xPhospho [S1191]	Spa2p	-2.05423	10.3094	-8.59369	3.76993	216.703	168.626	0	92.0192	0	0	794.39	473.534		Y					LMNTVETSPPKDVND
C1_12620W	SPA2	A0A1D8PFH4 [1176-1194]	A0A1D8PFH4 1xPhospho [S1191]	Spa2p	0.0169929	0.912307	0.430025	1.32534	262.512	533.844	296.868	508.935	632.288	440.956	1287.6	733.182		Y					LMNTVETSPPKDVND
C1_12620W	SPA2	A0A1D8PFH4 [1214-1224]	A0A1D8PFH4 1xPhospho [S1217]	Spa2p	0	-1.89029	8.06868	6.17839	0	0	0	0	206.102	61.3797	34.7988	36.6247			Y				PEQKTTHSGEQEVEK
C1_12620W	SPA2	A0A1D8PFH4 [1272-1293]	A0A1D8PFH4 1xPhospho [S1282]	Spa2p	-1.01155	0.00382581	0.122869	1.13825	1826.1	1594.89	827.346	869.003	2011.3	1713.9	2254.28	1480.81							PESEESYSEEETEEE
C1_12620W	SPA2	A0A1D8PFH4 [174-193]	A0A1D8PFH4 1xPhospho [S181]	Spa2p	8.08263	-9.82954	9.82954	-8.08263	0	0	129.275	140.816	737.916	170.969	0	0							EVDEEKESDSRDDLN
C1_12620W	SPA2	A0A1D8PFH4 [359-368]	A0A1D8PFH4 1xPhospho [S361]	Spa2p	0	-6.71198	6.71198	0	0	0	0	0	62.5419	41.2931	0	0							DNLTKSMSNSDENLK
C1_12620W	SPA2	A0A1D8PFH4 [432-452]	A0A1D8PFH4 1xPhospho [S438]	Spa2p	1.69879	1.003	0.865022	0.169238	3133.53	1602.9	4081.24	11296.8	4031.36	4596.24	8713.65	8578.52							KLETIQLSPGSTSNN
C1_12620W	SPA2	A0A1D8PFH4 [866-875]	A0A1D8PFH4 1xPhospho [S871]	Spa2p	0.264809	0.393249	-0.521262	-0.392822	7411.96	8465.05	5441.68	13634.4	7123.01	3939.19	6858.98	7669.84		Y					YKPNLDNSPVRKTSL
C1_12620W	SPA2	A0A1D8PFH4 [866-874]	A0A1D8PFH4 1xPhospho [S871]	Spa2p	1.47554	-0.942629	-0.0680879	-2.48626	0	132.524	130.561	239.753	0	126.369	0	65.268		Y					YKPNLDNSPVRKTSL
C1_12620W	SPA2	A0A1D8PFH4 [875-884]	A0A1D8PFH4 1xPhospho [S877]	Spa2p	-0.10959	-2.94532	2.39863	-0.437101	288.364	305.455	276.362	273.946	1263.81	1871.68	227.821	178.385	Y						NSPVRKTSLDSSEDK
C1_12620W	SPA2	A0A1D8PFH4 [974-979]	A0A1D8PFH4 1xPhospho [S976]	Spa2p	-6.35758	-3.76735	-0.257191	2.33304	1234.94	1188.67	28.5679	0	1461.61	566.1	0	147.983		Y					QSTSRNYSPIKNKSD
C1_12620W	SPA2	A0A1D8PFH4 [789-812]	A0A1D8PFH4 1xPhospho [T809]	Spa2p	0.0604792	0.962454	-0.501803	0.400171	5826	5006.17	4701.04	6594.93	4080.22	3569.42	7815.57	7091.63		Y					GALSTNTTPTKVKIS
C1_12620W	SPA2	A0A1D8PFH4 [1272-1293]	A0A1D8PFH4 2xPhospho [S/T/Y]	Spa2p	-1.01108	0.0816298	-0.0258025	1.06691	2206.17	1833.48	740.587	1263.28	2373.84	1594.19	2181.74	2017.33
C1_12620W	SPA2	A0A1D8PFH4 [1272-1291]	A0A1D8PFH4 2xPhospho [S/T/Y]	Spa2p	-1.00517	-0.203706	0.0803205	0.881788	1107.38	1079.88	420.122	669.09	1248.7	1063.84	1072.06	935.823
C1_12620W	SPA2	A0A1D8PFH4 [996-1007]	A0A1D8PFH4 2xPhospho [S1002; T/S]	Spa2p	1.82051	-4.87837	2.82615	-3.87273	338.255	0	725.377	471.894	1597.97	806.96	80.7986	0							RITSPEASPESQKSI
C1_12620W	SPA2	A0A1D8PFH4 [174-193]	A0A1D8PFH4 2xPhospho [S181; S/T]	Spa2p	-7.27561	-8.88309	1.60748	0	153.945	0	0	0	357.083	114.063	0	0							EVDEEKESDSRDDLN
C1_12620W	SPA2	A0A1D8PFH4 [219-240]	A0A1D8PFH4 2xPhospho [S224; S225]	Spa2p	-0.20464	-1.15949	0.927129	-0.0277182	8163.79	2924.04	4525.03	5096.36	10715.7	10368.5	6898.35	2539.93							TKANLDWSSDDEGDD	KANLDWSSDDEGDDE
C1_12620W	SPA2	A0A1D8PFH4 [789-812]	A0A1D8PFH4 2xPhospho [S805; T809]	Spa2p	-1.33378	-0.836513	0.314388	0.811657	1693.77	915.945	516.431	518.312	1927.49	1317.9	718.426	1098.54							NLTSGALSTNTTPTK	GALSTNTTPTKVKIS
C1_12620W	SPA2	A0A1D8PFH4 [866-884]	A0A1D8PFH4 2xPhospho [S871; T876]	Spa2p	0.576474	-0.258391	-0.574531	-1.4094	3000.3	966.806	2432.16	3484.07	1325.13	1338.47	1573.55	653.107		Y					YKPNLDNSPVRKTSL	DNSPVRKTSLDSSED
C1_12620W	SPA2	A0A1D8PFH4 [389-419]	A0A1D8PFH4 2xPhospho [T/S]	Spa2p	-0.54419	-0.487597	0.111708	0.168301	4927.12	4504.02	2230.47	4236.86	6668.78	3521.7	2832.96	4434.73
C1_12620W	SPA2	A0A1D8PFH4 [995-1007]	A0A1D8PFH4 2xPhospho [T/S]	Spa2p	7.11754	8.11428	0	0.996741	0	0	0	137.865	0	0	163.502	112.601
C1_12620W	SPA2	A0A1D8PFH4 [995-1007]	A0A1D8PFH4 3xPhospho [S1002; S1005; S/T]	Spa2p	0.197518	-2.20723	1.17722	-1.22753	1345.8	332.037	758.19	1165.98	2421.51	1374.03	509.576	311.561							RITSPEASPESQKSI	SPEASPESQKSISQA
C1_12620W	SPA2	A0A1D8PFH4 [1028-1045]	A0A1D8PFH4 3xPhospho [S1039; S1040; S]	Spa2p	0.303073	0.257987	0.195809	0.150723	608.824	428.63	405.983	874.23	727.51	460.901	659.413	761.895					Y		PQREDVPSSPSPRKS	QREDVPSSPSPRKSP
C1_12620W	SPA2	A0A1D8PFH4 [1272-1291]	A0A1D8PFH4 3xPhospho [Y1281; S/T]	Spa2p	-2.20804	-0.844705	1.22795	2.59128	321.834	159.355	0	103.359	641.965	486.484	324.127	303.778							TPESEESYSEEETEE
C1_12620W	SPA2	A0A1D8PFH4 [1272-1293]	A0A1D8PFH4 3xPhospho [Y1281; T/S]	Spa2p	-2.57668	-0.917666	0.00687882	1.66589	1943.7	1601.31	277.085	316.321	2490.17	1071.79	1107.76	777.347							TPESEESYSEEETEE
C1_12650C	C1_12650C	A0A1D8PFF9 [119-127]	A0A1D8PFF9 1xPhospho [S122]	E2 ubiquitin-conjugating protein	-0.977705	-19.9757	2.4659	-16.5321	0	186631	94768.5	0	0	1.03109e+06	0	0			Y				ELRKSMASPTNKKLQ
C1_12660W	MAD1	Q59PD6 [2-12]	Q59PD6 1xAcetyl [N-Term]; 1xPhospho [T/S]	Spindle assembly checkpoint component MAD1	0.676279	0.286474	-0.48126	-0.871065	26913.9	28628.7	43595.4	45163	27116.4	12671.4	19288.1	29239.5
C1_12660W	MAD1	Q59PD6 [2-12]	Q59PD6 1xAcetyl [N-Term]; 2xPhospho [T3; S]	Spindle assembly checkpoint component MAD1	0.874188	-1.3628	0.343475	-1.89351	22857.3	4457.09	32723.3	17344.2	23525.7	11131.3	6698.77	6776.19							XXXXXMSTGSSPFVD
C1_12670C	C1_12670C	A0A1D8PFI2 [28-37]	A0A1D8PFI2 1xPhospho [S]	U4/U6-U5 snRNP complex subunit	1.64162	-1.1704	1.66008	-1.15193	1.52828e+06	0	2.41352e+06	2.35496e+06	1.57561e+06	3.2543e+06	998193	1.14773e+06
C1_12710C	C1_12710C	A0A1D8PFG3 [215-226]	A0A1D8PFG3 1xPhospho [S218]	EAF domain-containing protein	8.11187	2.00523	7.71288	1.60624	1702.35	3381.05	1.40577e+06	781.122	1351.97	1.06536e+06	55630.2	4.22671e+06							MASKRPPSATNTPEI
C1_12710C	C1_12710C	A0A1D8PFG3 [420-436]	A0A1D8PFG3 1xPhospho [S428]	EAF domain-containing protein	9.11339	0.291683	9.37929	0.557585	2658.79	4847.2	4.15758e+06	289.824	2304.71	4.99706e+06	65928	6.05363e+06							ISIDNGNSNEELNFN
C1_12710C	C1_12710C	A0A1D8PFG3 [445-467]	A0A1D8PFG3 2xPhospho [S/T]	EAF domain-containing protein	7.18196	-2.23022	8.57111	-0.841074	610.984	19514.2	2.92026e+06	2192.49	3655.77	7.65092e+06	19805.1	1.61159e+06
C1_12710C	C1_12710C	A0A1D8PFG3 [215-228]	A0A1D8PFG3 2xPhospho [T220; S/T]	EAF domain-containing protein	8.23521	0.85917	8.16563	0.789587	1561.24	2377.54	1.18685e+06	339.885	852.724	1.13043e+06	13938.5	2.03821e+06							SKRPPSATNTPEIKP
C1_12730W	RVS162	Q59PE4 [13-20]	Q59PE4 1xPhospho [T15]	RVS161-like protein RVS162	-18.7325	-20.9555	2.22298	0	435570	0	0	0	739624	1.29387e+06	0	0							KAINRAGTQVMLKTG
C1_12740W	C1_12740W	A0A1D8PFI5 [868-879]	A0A1D8PFI5 1xPhospho [S/T]	USP domain-containing protein	-0.373071	-1.11708	0.705135	-0.0388743	18985.8	16503.2	12533.9	14868.2	23763.6	34094.6	11157.2	15516.4
C1_12740W	C1_12740W	A0A1D8PFI5 [704-716]	A0A1D8PFI5 1xPhospho [S]	USP domain-containing protein	-0.376384	-0.84379	1.5141	1.04669	1144.44	911.709	565.079	1018.68	2703.98	3170.66	1216.74	2056.04
C1_12740W	C1_12740W	A0A1D8PFI5 [789-805]	A0A1D8PFI5 1xPhospho [S]	USP domain-containing protein	0.396246	-0.281956	1.10916	0.430955	1160.92	2474.05	1698.5	3085.72	3391.23	4451.26	2934.84	3515.23
C1_12740W	C1_12740W	A0A1D8PFI5 [427-436]	A0A1D8PFI5 1xPhospho [S432]	USP domain-containing protein	0.372834	-0.861977	1.62047	0.38566	552.873	0	467.666	248.541	486.136	1215.89	476.861	459.141			Y				LRSNSVKSDNIKVGV
C1_12740W	C1_12740W	A0A1D8PFI5 [860-867]	A0A1D8PFI5 1xPhospho [S863]	USP domain-containing protein	1.37729	-13.5377	3.1221	-11.7929	1364.83	0	2244.83	1302.32	1640.25	10250.4	0	0							RAIKLTTSPSVKIDS
C1_12740W	C1_12740W	A0A1D8PFI5 [880-903]	A0A1D8PFI5 1xPhospho [S882]	USP domain-containing protein	0.460726	-0.773579	0.326056	-0.908249	2215.34	2348.65	3438.1	2843.39	2473.55	3248.03	2697.9	648.606							GELNKQISPINLDTS
C1_12740W	C1_12740W	A0A1D8PFI5 [427-436]	A0A1D8PFI5 2xPhospho [S429; S432]	USP domain-containing protein	-0.546076	-9.67423	-0.448487	-9.57664	700.32	413.595	556.922	205.662	816.022	0	0	0			Y			Y	KTRLRSNSVKSDNIK	LRSNSVKSDNIKVGV
C1_12740W	C1_12740W	A0A1D8PFI5 [868-879]	A0A1D8PFI5 2xPhospho [S873; S/T]	USP domain-containing protein	0.516877	-3.40045	3.19804	-0.719295	1197.13	0	0	1713.35	5865.48	5128.83	0	1040.28			Y				VKIDSTESVGELNKQ
C1_12750C	C1_12750C	A0A1D8PFH7 [82-102]	A0A1D8PFH7 1xPhospho [S/T]	WD_REPEATS_REGION domain-containing protein	0.427904	0.826089	1.06852	1.46671	1.03819e+06	1.37797e+06	1.86948e+06	1.38091e+06	2.54999e+06	2.51737e+06	4.45892e+06	4.52486e+06
C1_12750C	C1_12750C	A0A1D8PFH7 [82-102]	A0A1D8PFH7 2xPhospho [S/T]	WD_REPEATS_REGION domain-containing protein	0.293554	1.74086	0.716028	2.16333	711482	0	872033	0	0	1.16872e+06	1.19579e+06	2.71046e+06
C1_12770W	RPG1A	Q59PL9 [892-912]	Q59PL9 1xPhospho [S]	Eukaryotic translation initiation factor 3 subunit A (eIF3a) (Eukaryotic translation initiation factor 3 110 kDa subunit homolog) (eIF3 p110) (Translation initiation factor eIF3, p110 subunit homolog)	-1.5794	-0.00194957	-1.05415	0.523297	2325.73	3234.63	887.745	972.207	1417.87	1259.37	1386.27	1287.36
C1_12770W	RPG1A	Q59PL9 [893-912]	Q59PL9 1xPhospho [S]	Eukaryotic translation initiation factor 3 subunit A (eIF3a) (Eukaryotic translation initiation factor 3 110 kDa subunit homolog) (eIF3 p110) (Translation initiation factor eIF3, p110 subunit homolog)	-0.798715	-0.237558	-1.08754	-0.526378	10652.8	14251.4	6231.42	8084.59	6959.34	4759.15	5769.62	4169.62
C1_12770W	RPG1A	Q59PL9 [893-913]	Q59PL9 1xPhospho [S]	Eukaryotic translation initiation factor 3 subunit A (eIF3a) (Eukaryotic translation initiation factor 3 110 kDa subunit homolog) (eIF3 p110) (Translation initiation factor eIF3, p110 subunit homolog)	0.0403084	1.8933	-1.59106	0.261937	326.164	649.822	396.903	606.765	110.003	213.287	647.478	556.207
C1_12830C	C1_12830C	A0A1D8PFH9 [214-220]	A0A1D8PFH9 1xPhospho [S/T]	WD_REPEATS_REGION domain-containing protein	-1.01256	0.00223841	-1.27235	-0.257559	40199528	5.92529e+07	2.20197e+07	2.72756e+07	3.4583e+07	6.58866e+06	2.08007e+07	2.04349e+07
C1_12830C	C1_12830C	A0A1D8PFH9 [862-886]	A0A1D8PFH9 1xPhospho [S/T]	WD_REPEATS_REGION domain-containing protein	0.567747	0.700425	2.36185	2.49453	1.35289e+06	0	2.00526e+06	0	3.86262e+06	3.09162e+06	6.45085e+06	4.84967e+06
C1_12880C	C1_12880C	Q5AL59 [445-454]	Q5AL59 1xPhospho [S452]	HTH CENPB-type domain-containing protein	-0.28712	-1.03756	-6.30477	-7.05521	4524395	3.38084e+06	3.48229e+06	2.99634e+06	65741.2	34255.5	24033.6	24679.4		Y					VSTDANVSPRRKFMR
C1_12880C	C1_12880C	Q5AL59 [460-467]	Q5AL59 1xPhospho [S464]	HTH CENPB-type domain-containing protein	-0.807304	-0.81265	-6.72509	-6.73044	1795555	1.80135e+06	1.33811e+06	717332	17081	16917.7	0	19356.2		Y					FMRQFNLSPSKYQSP
C1_12910W	C1_12910W	A0A1D8PFL4 [2-14]	A0A1D8PFL4 1xPhospho [S4]	Uncharacterized protein	-0.0893648	-22.3805	0.557549	-21.7336	1.49602e+06	2.21392e+06	2.40906e+06	1.07805e+06	3.41387e+06	2.0463e+06	0	0							XXXXMAASISQPQQQ
C1_12960C	BNI1	Q5AL52 [1026-1037]	Q5AL52 1xPhospho [S]	Formin BNI1	-2.0084	2.7439	-0.562532	4.18977	6136.56	11428	3787.62	577.264	5725.43	6167.42	9019.12	70654.1
C1_12960C	BNI1	Q5AL52 [947-961]	Q5AL52 1xPhospho [S]	Formin BNI1	-1.17251	2.02226	-0.362597	2.83217	6256.89	44475.9	11508.4	10998.6	22725.2	16732.7	114543	45745.8
C1_12960C	BNI1	Q5AL52 [997-1013]	Q5AL52 1xPhospho [S]	Formin BNI1	-0.455056	1.31094	0.505777	2.27178	7789.42	71716.8	31264.5	26733.6	54869	58021.4	195711	84376.4
C1_12960C	BNI1	Q5AL52 [1608-1622]	Q5AL52 1xPhospho [S1614]	Formin BNI1	-0.445171	-2.97019	1.7138	-0.811225	0	15578.2	5816.94	5624.91	25954.7	25147.6	6520.25	0			Y				RTTGSVGSPTNVSPT
C1_12960C	BNI1	Q5AL52 [1607-1633]	Q5AL52 1xPhospho [S1619]	Formin BNI1	3.46085	1.30104	3.80096	1.64114	315.042	0	2262.34	1216.55	0	4404.01	4515.07	6338.13		Y	Y				VGSPTNVSPTRNNES
C1_12960C	BNI1	Q5AL52 [1608-1633]	Q5AL52 1xPhospho [S1619]	Formin BNI1	3.89748	1.4249	3.51177	1.03918	409.679	0	2704.48	3414.67	3018.05	1665.3	6596.76	5979.53		Y	Y				VGSPTNVSPTRNNES
C1_12960C	BNI1	Q5AL52 [1717-1727]	Q5AL52 1xPhospho [S1717]	Formin BNI1	10.3716	9.29713	0	-1.07452	0	0	0	1323.88	0	0	0	628.092							QERLKKKSVQIDLDE
C1_12960C	BNI1	Q5AL52 [321-328]	Q5AL52 1xPhospho [S324]	Formin BNI1	-1.57045	0	-9.48846	-7.91801	717.309	0	240.856	0	0	0	0	0							KVLRALDSINEKSRM
C1_12960C	BNI1	Q5AL52 [63-77]	Q5AL52 1xPhospho [S73]	Formin BNI1	11.4868	-0.0682991	12.2346	0.679535	0	0	1647.38	1221.5	1989.01	2829.3	4595.48	0			Y				TYSISSLSPYDKGAS
C1_12960C	BNI1	Q5AL52 [743-768]	Q5AL52 1xPhospho [S765]	Formin BNI1	-0.328536	1.58719	-0.00910402	1.90662	1133.36	7339.8	3568.71	3178.64	4126.37	4293.48	17506.7	7793.78		Y					EENNNDQSPEKSEID
C1_12960C	BNI1	Q5AL52 [776-796]	Q5AL52 1xPhospho [S786]	Formin BNI1	-2.50736	0.838382	0.0659333	3.41168	1099.8	9036.84	1099.42	682.556	6449.67	4161.03	14483	4490.23							ESEAEIQSVEEDEEE
C1_12960C	BNI1	Q5AL52 [947-958]	Q5AL52 1xPhospho [S956]	Formin BNI1	-0.794304	1.00102	0.404272	2.19959	11509.3	151113	54449.1	39321.7	100582	114636	287732	143008							APDVVSNSPRTQKRA
C1_12960C	BNI1	Q5AL52 [63-77]	Q5AL52 2xPhospho [S71; Y/S]	Formin BNI1	0	-0.874645	11.824	10.9493	0	0	0	0	1758.29	1866.24	0	1976.32							ASTYSISSLSPYDKG
C1_12960C	BNI1	Q5AL52 [922-928]	Q5AL52 2xPhospho [S924; S926]	Formin BNI1	0	-8.3424	8.3424	0	0	0	0	0	323.574	0	0	0							AAAQKIKSPSPKRNT	AQKIKSPSPKRNTVL
C1_12970C	SEC2	Q5AL49 [593-603]	Q5AL49 1xPhospho [S]	Rab guanine nucleotide exchange factor SEC2 (GDP-GTP exchange factor SEC2)	0.829826	-0.769603	2.36739	0.767962	298.307	369.331	501.242	686.242	1095.69	2353.53	1232.2	790.625
C1_12970C	SEC2	Q5AL49 [593-609]	Q5AL49 1xPhospho [S]	Rab guanine nucleotide exchange factor SEC2 (GDP-GTP exchange factor SEC2)	1.09326	1.06252	1.77665	1.74592	796.165	176.109	693.306	1382.22	2093.91	1239.81	3553.5	3410.34
C1_12970C	SEC2	Q5AL49 [578-592]	Q5AL49 1xPhospho [S584]	Rab guanine nucleotide exchange factor SEC2 (GDP-GTP exchange factor SEC2)	1.85167	-1.07007	3.77467	0.852931	578.031	0	995.923	1092.9	2792.07	5131.77	1245.78	2527.79							RSQSNFNSPRQSVDG
C1_12970C	SEC2	Q5AL49 [578-586]	Q5AL49 1xPhospho [S584]	Rab guanine nucleotide exchange factor SEC2 (GDP-GTP exchange factor SEC2)	9.08462	-11.38	11.38	-9.08462	0	0	392.324	149.605	761.592	1902.63	0	0							RSQSNFNSPRQSVDG
C1_12970C	SEC2	Q5AL49 [626-639]	Q5AL49 1xPhospho [S635]	Rab guanine nucleotide exchange factor SEC2 (GDP-GTP exchange factor SEC2)	-0.513857	-0.601074	0.505033	0.417816	2520.08	1682.82	1194.01	1749.18	3613.73	2351.26	2394.83	1537.33							VVRSETASAEEKFED
C1_12970C	SEC2	Q5AL49 [626-639]	Q5AL49 2xPhospho [S635; T/S]	Rab guanine nucleotide exchange factor SEC2 (GDP-GTP exchange factor SEC2)	8.06878	-12.502	12.502	-8.06878	0	0	189.712	77.7889	3435.63	2363.99	0	0							VVRSETASAEEKFED
C1_12970C	SEC2	Q5AL49 [198-219]	Q5AL49 3xPhospho [Y198; T203; S/T]	Rab guanine nucleotide exchange factor SEC2 (GDP-GTP exchange factor SEC2)	-10.0397	-2.51937	2.60765	10.128	820.221	231.371	0	0	3633.01	2781.66	444.3	673.712			Y				SESKLSKYNTRSTLG	SKYNTRSTLGDEESQ
C1_13100W	C1_13100W	A0A1D8PFK2 [36-69]	A0A1D8PFK2 1xPhospho [T44]	Uncharacterized protein	0	20.8764	0	20.8764	0	0	0	0	0	0	0	1.92492e+06			Y				GYISSSPTDSSINSN
C1_13110C	CHS3	A0A1D8PFK5 [2-11]	A0A1D8PFK5 1xAcetyl [N-Term]; 1xPhospho [S]	Chitin synthase	-1.01524	-1.70137	0.609537	-0.0765926	14984.7	9341.69	6031.52	6003.32	19503.2	17613.8	6697.06	4715.47
C1_13110C	CHS3	A0A1D8PFK5 [125-141]	A0A1D8PFK5 1xPhospho [S139]	Chitin synthase	-1.05368	0.148733	-0.195704	1.00671	1944.04	2150.02	996.578	975.164	1763.41	1811.18	1884.37	2078.51		Y					EINDYGSSPKKNQVI
C1_13110C	CHS3	A0A1D8PFK5 [73-80]	A0A1D8PFK5 1xPhospho [S73]	Chitin synthase	-2.2536	-2.68702	1.25372	0.820293	1069.63	526.866	260.92	73.0742	3356.4	451.901	288.945	301.576							TGVDPRKSNELSTSR
C1_13170C	MSH6	A0A1D8PFM1 [2-23]	A0A1D8PFM1 1xPhospho [S/T]	DNA mismatch repair protein	0.821824	-0.221505	0.860619	-0.18271	1.65264e+06	1.87923e+06	2.86393e+06	3.37915e+06	3.6034e+06	2.80984e+06	2.82382e+06	2.67662e+06
C1_13170C	MSH6	A0A1D8PFM1 [142-158]	A0A1D8PFM1 1xPhospho [S/Y]	DNA mismatch repair protein	-0.162168	0.0186128	1.34356	1.52434	2.17046e+07	1.60759e+07	2.14472e+07	1.23164e+07	3.9596e+07	5.62819e+07	4.4066e+07	5.30569e+07
C1_13170C	MSH6	A0A1D8PFM1 [45-56]	A0A1D8PFM1 1xPhospho [S]	DNA mismatch repair protein	0.521931	-0.208743	1.05564	0.324971	5.00007e+06	2.92589e+06	5.92412e+06	5.45657e+06	9.09635e+06	7.37892e+06	5.07476e+06	9.18114e+06
C1_13170C	MSH6	A0A1D8PFM1 [101-108]	A0A1D8PFM1 1xPhospho [S]	DNA mismatch repair protein	0.682437	-0.933113	1.94924	0.333695	9.29812e+06	6.74059e+06	1.61746e+07	9.56515e+06	3.80353e+07	2.39018e+07	1.52508e+07	1.71873e+07
C1_13170C	MSH6	A0A1D8PFM1 [101-113]	A0A1D8PFM1 1xPhospho [S106]	DNA mismatch repair protein	-0.498109	-22.3181	2.90252	-18.9175	699323	0	0	495144	3.99533e+06	1.23373e+06	0	0		Y					IKPQLASSPKREELK
C1_13170C	MSH6	A0A1D8PFM1 [64-70]	A0A1D8PFM1 1xPhospho [S68]	DNA mismatch repair protein	0.316397	0.0869917	0.516474	0.287068	5.79904e+06	2.66207e+06	6.0824e+06	4.45352e+06	6.2194e+06	5.88384e+06	6.9269e+06	5.92859e+06							DTKPFLSSDKENDDH
C1_13170C	MSH6	A0A1D8PFM1 [83-97]	A0A1D8PFM1 1xPhospho [S89]	DNA mismatch repair protein	-0.766259	-0.678813	1.10263	1.19008	3.75647e+06	3.69257e+06	2.92248e+06	1.45711e+06	7.56292e+06	8.43359e+06	4.26582e+06	5.72686e+06							KNTTLVTSQPDDTGD
C1_13170C	MSH6	A0A1D8PFM1 [265-271]	A0A1D8PFM1 1xPhospho [T267]	DNA mismatch repair protein	-0.353955	-2.33541	1.87136	-0.110101	583560	1.10706e+06	716047	606753	2.55065e+06	3.63492e+06	377454	848150		Y					STTIKSLTPSKKSFE
C1_13170C	MSH6	A0A1D8PFM1 [45-56]	A0A1D8PFM1 2xPhospho [S]	DNA mismatch repair protein	-0.549026	0.389496	0.241548	1.18007	4.1938e+06	3.69721e+06	2.93821e+06	2.45515e+06	3.91202e+06	5.41722e+06	6.05575e+06	6.16495e+06
C1_13170C	MSH6	A0A1D8PFM1 [2-23]	A0A1D8PFM1 2xPhospho [T/S]	DNA mismatch repair protein	1.4356	-1.36731	2.19066	-0.61225	2979875	4.04848e+06	9.75596e+06	9.25543e+06	1.96391e+07	1.24464e+07	5.51174e+06	6.92504e+06
C1_13170C	MSH6	A0A1D8PFM1 [45-56]	A0A1D8PFM1 3xPhospho [S51; S52; S]	DNA mismatch repair protein	-0.368221	-2.09245	0.79885	-0.925378	1.14264e+06	4.07519e+06	1.10038e+06	2.94206e+06	5.01952e+06	4.05802e+06	1.05811e+06	1.07041e+06			Y				KQQPSPLSSSPLKSK	QQPSPLSSSPLKSKS
C1_13240W	C1_13240W	A0A1D8PFL6 [134-143]	A0A1D8PFL6 1xPhospho [S140]	Uncharacterized protein	2.95026	0.403869	3.23874	0.692354	624054	0	2.9351e+06	1.88814e+06	1.21452e+06	4.67638e+06	4.59516e+06	3.1988e+06		Y	Y		Y		KSGISPPSPPKLNFT
C1_13300C	RPN1	A0A1D8PFL7 [668-686]	A0A1D8PFL7 1xPhospho [S]	26S proteasome regulatory subunit RPN1	0.384854	-3.11582	3.78497	0.284295	23.2112	0	19.9679	10.6453	208.631	124.106	18.2944	19.2047
C1_13320C	C1_13320C	A0A1D8PFM7 [2-29]	A0A1D8PFM7 1xAcetyl [N-Term]; 1xPhospho [S]	Uncharacterized protein	-0.0328815	0.829464	-0.14635	0.715996	3073.55	1823.02	2476.54	2309.66	1367.1	3057.01	3352.81	4509.72
C1_13320C	C1_13320C	A0A1D8PFM7 [44-73]	A0A1D8PFM7 1xPhospho [T63]	Uncharacterized protein	-0.449009	-1.69048	1.34373	0.10225	6.22683	27.8107	0	24.6666	23.1748	64.7525	8.44957	18.1021			Y				QQQSSSGTPSSSSSS
C1_13320C	C1_13320C	A0A1D8PFM7 [44-74]	A0A1D8PFM7 1xPhospho [T63]	Uncharacterized protein	1.50565	-6.52999	3.49324	-4.5424	0	7.20641	18.0058	4.2965	33.9727	57.438	0	0			Y				QQQSSSGTPSSSSSS
C1_13320C	C1_13320C	A0A1D8PFM7 [2-29]	A0A1D8PFM7 2xPhospho [S2; Y8]	Uncharacterized protein	-1.14012	7.14946	-6.43335	1.85623	50.6705	34.7528	38.2121	0	0	0	50.3257	90.6462							XXXXXXMSNHEDDYS	MSNHEDDYSQNIDEQ
C1_13350W	STP2	Q5AL16 [175-191]	Q5AL16 1xPhospho [S]	Transcriptional regulator STP2	-0.386245	-0.217936	-0.292607	-0.124299	2.46184e+07	2.87046e+07	2.17941e+07	1.90043e+07	2.56854e+07	1.78488e+07	1.90481e+07	1.83824e+07
C1_13410W	COX19	Q5AL10 [12-20]	Q5AL10 1xPhospho [T14]	Cytochrome c oxidase assembly protein COX19	-1.02086	-3.02507	3.305	1.30079	553.839	905.461	422.926	295.742	12375.1	2056.55	935.364	836.64							GGNFRTWTPTPPERG
C1_13480W	SSA1	P41797 [539-549]; P46587 [538-548]	P41797 1xPhospho [S]; P46587 1xPhospho [S]	Heat shock protein SSA1	0.115141	-5.19163	-3.23002	-8.5368	150.963	190.94	219.918	150.474	20.511	15.0348
C1_13480W	SSA1	P41797 [127-138]	P41797 1xPhospho [S135]	Heat shock protein SSA1	1.26987	-0.123545	0.497343	-0.896075	3.46694	3.42645	7.31285	10.7213	7.5005	2.6419	6.15599	3.07195							IAEGYLGSTVKDAVV
C1_13480W	SSA1	P41797 [458-468]; P46587 [457-467]	P41797 1xPhospho [S461]; P46587 1xPhospho [S460]	Heat shock protein SSA1	-0.210382	-3.70004	-0.63256	-4.12222	3.51937	15.6291	9.64617	6.76832	7.37331	4.62308									LLGKFELSGIPPAPR
C1_13480W	SSA1	P41797 [512-523]	P41797 1xPhospho [S519]	Heat shock protein SSA1	-0.129246	-2.54946	1.34051	-1.07971	1.3117	0	0	1.11361	4.85414	0	0	0							EEIDKMVSEAEKFKE
C1_13570W	MPT5	A0A1D8PFN4 [99-113]	A0A1D8PFN4 1xPhospho [S101]	Mpt5p	0.0740267	1.34215	-7.66949	-6.40136	4.94174e+06	4.76953e+06	3.72251e+06	6.50007e+06	21215.3	26485.1	110511	10425.4				Y		Y	SLHARSLSNGATGSF
C1_13570W	MPT5	A0A1D8PFN4 [679-689]	A0A1D8PFN4 1xPhospho [S681]	Mpt5p	3.31881	-0.340531	-3.09493	-6.75428	225428	0	825688	1.42374e+06	15854.7	10528.4	11373.4	9462.45							PQPKRQISQPLPLSY
C1_13570W	MPT5	A0A1D8PFN4 [239-265]	A0A1D8PFN4 1xPhospho [T241]	Mpt5p	0.167373	-2.78671	-6.84507	-9.79915	1.62191e+06	1.83366e+06	1.84878e+06	2.03186e+06	14819.7	15236.6	0	4354.78							NSVTRGCTPTSSSST
C1_13580W	SEC18	A0A1D8PFN6 [11-22]	A0A1D8PFN6 1xPhospho [S]	AAA family ATPase	0.93455	-1.0117	0.899298	-1.04696	1361.62	678.896	2405.58	1495.35	2941.22	865.524	1003.13	884.358
C1_13610C	KIS2	Q5AKY0 [686-695]	Q5AKY0 1xPhospho [S]	Kis2p	-0.755566	-22.0385	0.247039	-21.0359	0	3.62974e+06	280450	1.86949e+06	2.62759e+06	1.68007e+06	0	0
C1_13610C	KIS2	Q5AKY0 [685-695]	Q5AKY0 1xPhospho [S]	Kis2p	-0.22668	-1.14879	2.21231	1.2902	3244422	2.13278e+06	2.02987e+06	2.56548e+06	1.72743e+07	7.64452e+06	1.59801e+06	9.6405e+06
C1_13610C	KIS2	Q5AKY0 [18-28]	Q5AKY0 1xPhospho [S]	Kis2p	0.735131	0.438494	1.50679	1.21015	3.6765e+06	3.45703e+06	5.94443e+06	5.92968e+06	1.25771e+07	7.6947e+06	4.63545e+06	2.28367e+07
C1_13610C	KIS2	Q5AKY0 [77-88]	Q5AKY0 1xPhospho [S86]	Kis2p	0.765599	0.399955	0.862288	0.496645	7.30364e+07	6.96311e+07	1.09787e+08	1.32759e+08	1.28843e+08	1.30515e+08	1.63079e+08	1.79135e+08							EAAPLQPSPKGEPTN
C1_13610C	KIS2	Q5AKY0 [198-207]	Q5AKY0 1xPhospho [T/S]	Kis2p	0.790962	0.387733	0.130376	-0.272853	44722837	4.85889e+07	5.78404e+07	1.0361e+08	6.34544e+07	3.86827e+07	6.04666e+07	7.3163e+07
C1_13610C	KIS2	Q5AKY0 [685-695]	Q5AKY0 2xPhospho [S689; Y/S]	Kis2p	-0.968467	-0.58473	2.26103	2.64476	2.08434e+06	2.32152e+06	1.07699e+06	1.17462e+06	1.34421e+07	7.67663e+06	7.04097e+06	7.04043e+06							PLRRADSSYYASNKD
C1_13610C	KIS2	Q5AKY0 [198-207]	Q5AKY0 2xPhospho [T/S]	Kis2p	0.90361	0.457974	0.176007	-0.26963	2.39175e+07	3.44166e+07	4.99032e+07	5.92248e+07	3.37068e+07	3.21963e+07	4.073e+07	4.97952e+07
C1_13620W	ROB1	A0A1D8PFP2 [109-120]	A0A1D8PFP2 1xPhospho [S]	Rob1p	0.159113	-0.196227	1.21174	0.856403	15845.2	8778.39	14693.2	12801.6	34086.4	22947.3	14457.1	35323.5
C1_13620W	ROB1	A0A1D8PFP2 [176-193]	A0A1D8PFP2 1xPhospho [S]	Rob1p	9.44738	11.01	0	1.56261	0	0	697.142	0	0	0	528.753	1532.47
C1_13620W	ROB1	A0A1D8PFP2 [194-204]	A0A1D8PFP2 1xPhospho [S196]	Rob1p	-1.45175	-9.51095	-0.144737	-8.20393	596.105	209.481	0	293.869	728.593	0	0	0							PQILRIPSRPFQQQT
C1_13620W	ROB1	A0A1D8PFP2 [109-120]	A0A1D8PFP2 2xPhospho [S]	Rob1p	0.00232036	-2.22965	1.56556	-0.666414	1540.77	0	913.027	630.224	3189.13	1373.37	0	971.987
C1_13640W	CUP2	Q5AKX6 [123-147]	Q5AKX6 1xPhospho [S]	Cup2p	1.04748	2.03917	-1.33162	-0.339934	2.37922e+06	1.55234e+07	1.03574e+07	2.6646e+07	3.84871e+06	3.26438e+06	1.29835e+07	1.62521e+07
C1_13640W	CUP2	Q5AKX6 [122-147]	Q5AKX6 1xPhospho [S]	Cup2p	1.46452	0.379734	-0.0851539	-1.16994	4.26429e+06	3.7662e+06	1.05383e+07	1.16235e+07	5.69782e+06	1.87239e+06	3.26679e+06	6.58284e+06
C1_13640W	CUP2	Q5AKX6 [123-148]	Q5AKX6 1xPhospho [S]	Cup2p	1.62087	-21.5912	0.0725934	-23.1395	560193	2.44419e+06	2.54425e+06	6.69602e+06	2.12072e+06	1.0387e+06	0	0
C1_13640W	CUP2	Q5AKX6 [122-148]	Q5AKX6 1xPhospho [S138]	Cup2p	-0.334174	-0.151263	1.11801	1.30092	1.52417e+06	1.89814e+06	1.12218e+06	1.59252e+06	4.26708e+06	3.16093e+06	2.79464e+06	3.89401e+06							SAASSSASPSSAASP
C1_13640W	CUP2	Q5AKX6 [505-522]	Q5AKX6 1xPhospho [S518]	Cup2p	-3.49193	-4.12204	0.0442783	-0.585827	5.73867e+06	6.48621e+06	1.0866e+06	0	8.02879e+06	4.5771e+06	723963	0							DTIYPSYSNENKITI
C1_13640W	CUP2	Q5AKX6 [123-148]	Q5AKX6 2xPhospho [S/T]	Cup2p	2.55921	21.9741	-21.2856	-1.87073	676525	1.87975e+06	4.12913e+06	1.09371e+07	0	0	1.82572e+06	2.29394e+06
C1_13640W	CUP2	Q5AKX6 [122-147]	Q5AKX6 2xPhospho [T/S]	Cup2p	20.5724	0	0	-20.5724	0	0	0	1.55918e+06	0	0	0	0
C1_13650C	C1_13650C	Q5AKX4 [398-409]	Q5AKX4 1xPhospho [S404]	Uncharacterized protein	10.9106	-1.52021	13.0459	0.615101	0	0	0	1923.93	0	8455.83	0	2947.35							KVNDLSDSGYLPKSL
C1_13660W	RAD54	Q5AKX3 [188-208]	Q5AKX3 1xPhospho [S200]	DNA-dependent ATPase	-0.561873	0.418965	1.58924	2.57008	864252	786277	1.1181e+06	0	2.24567e+06	2.72061e+06	2.82204e+06	3.81773e+06			Y				SSTSSSTSPEPEPET
C1_13690C	C1_13690C	A0A1D8PFS0 [2-23]	A0A1D8PFS0 1xAcetyl [N-Term]; 1xPhospho [T/Y]	SNAP receptor	-0.191646	-1.2162	2.16936	1.1448	825.327	812.536	468.504	965.495	4154.35	3216.63	2276.02	895.99
C1_13690C	C1_13690C	A0A1D8PFS0 [59-70]	A0A1D8PFS0 1xPhospho [S65]	SNAP receptor	-1.36319	5.06252	-4.30969	2.11602	1651.18	211.393	723.41	0	92.9722	0	2572.05	567.24							KTDNLAISAQGFRRG
C1_13700W	ACT1	A0A1D8PFR4 [317-327]	A0A1D8PFR4 1xPhospho [S]	Actin	1.12818	-0.983828	0.707562	-1.40445	62.3359	44.8642	119.417	116.09	103.591	72.104	59.2747	29.0689
C1_13710C	DAD1	A0A1D8PFP9 [85-98]	A0A1D8PFP9 1xPhospho [S]	Dad1p	0.0611372	-1.91464	0.842348	-1.13343	117.675	192.436	163.861	159.717	556.811	0	85.7638	61.1893
C1_13710C	DAD1	A0A1D8PFP9 [85-99]	A0A1D8PFP9 1xPhospho [S]	Dad1p	1.01222	-1.08812	0.87127	-1.22907	56597.8	26225.7	86509.5	80547.6	124552	26956	46605.9	24658.6
C1_13710C	DAD1	A0A1D8PFP9 [85-99]	A0A1D8PFP9 2xPhospho [S/T]	Dad1p	0.260101	-2.56216	1.09937	-1.72289	17224.2	3106.86	17410.1	6937.81	33001.1	10561.6	3745.62	3629.68
C1_13710C	DAD1	A0A1D8PFP9 [76-98]	A0A1D8PFP9 2xPhospho [S86; S/T]	Dad1p	-0.654654	-7.82374	-0.301888	-7.47098	278.292	0	108.722	67.6915	225.559	0	0	0							RDENNKISSSDTEDE
C1_13710C	DAD1	A0A1D8PFP9 [76-98]	A0A1D8PFP9 3xPhospho [S86; S87; S88]	Dad1p	6.71976	-9.18844	9.18844	-6.71976	0	0	47.0812	57.3211	456.969	125.47	0	0							RDENNKISSSDTEDE	DENNKISSSDTEDEN	ENNKISSSDTEDENN
C1_13710C	DAD1	A0A1D8PFP9 [85-99]	A0A1D8PFP9 3xPhospho [S87; S88; T90]	Dad1p	0.535966	-9.7322	1.80784	-8.46033	241.924	0	351.219	0	767.089	82.4328	0	0			Y				DENNKISSSDTEDEN	ENNKISSSDTEDENN	NKISSSDTEDENNNN
C1_13760W	AGM1	Q5AKW4 [58-76]	Q5AKW4 1xPhospho [S66]	Phosphoacetylglucosamine mutase (PAGM) (EC 5.4.2.3) (Acetylglucosamine phosphomutase) (N-acetylglucosamine-phosphate mutase)	-0.0399085	1.02637	1.01437	2.08065	64.0458	0	62.2711	0	130.394	0	156.356	110.279							VGVMITASHNPPEDN
C1_13810W	C1_13810W	Q5AKV9 [24-37]	Q5AKV9 1xPhospho [S35]	Uncharacterized protein	-0.743487	2.39696	-0.410864	2.72959	1.21286e+06	2.10067e+06	865514	1.11364e+06	0	2.49235e+06	6.70199e+06	6.42506e+06					Y		YTSNLPPSPKEFIVE
C1_13820C	C1_13820C	Q5AKV7 [1-34]	Q5AKV7 1xAcetyl [N-Term]; 1xPhospho [S27]	Uncharacterized protein	-0.648555	8.76647	-11.1738	-1.75879	2309.23	0	612.078	860.66	0	0	434.483	0							TNIPQVTSPTQSNLR
C1_13830C	PDX1	Q5AKV6 [302-317]	Q5AKV6 1xPhospho [S/T]	Pdx1p	0.372864	0.692837	0.196932	0.516905	349.567	198.099	428.74	280.739	333.865	294.048	464.8	550.813
C1_13860C	GND1	A0A1D8PFS4 [309-321]	A0A1D8PFS4 1xPhospho [S/T]	6-phosphogluconate dehydrogenase, decarboxylating (EC 1.1.1.44)	0.319371	-0.348236	0.872805	0.205198	52.0334	56.1156	71.8865	63.3081	108.504	90.3718	70.1787	85.8324
C1_13860C	GND1	A0A1D8PFS4 [309-322]	A0A1D8PFS4 1xPhospho [T/S]	6-phosphogluconate dehydrogenase, decarboxylating (EC 1.1.1.44)	0.136861	0.251379	0.660425	0.774943	40.8063	46.1548	47.8616	47.8526	86.1789	51.8479	73.443	91.0467
C1_13870W	MET3	Q9Y872 [366-375]	Q9Y872 1xPhospho [S370]	Sulfate adenylyltransferase (EC 2.7.7.4) (ATP-sulfurylase) (Sulfate adenylate transferase) (SAT)	-0.617723	-1.49203	0.185609	-0.688696	440.322	345.809	146.948	365.024	583.649	310.552	159.844	157.411							KVRTANISGTELRNK
C1_13870W	MET3	Q9Y872 [31-40]	Q9Y872 1xPhospho [T31]	Sulfate adenylyltransferase (EC 2.7.7.4) (ATP-sulfurylase) (Sulfate adenylate transferase) (SAT)	0	-7.82701	7.82701	0	0	0	0	0	145.512	80.5604	0	0							QLLQEAKTLPALTLT
C1_13870W	MET3	Q9Y872 [2-10]	Q9Y872 1xPhospho [T5]	Sulfate adenylyltransferase (EC 2.7.7.4) (ATP-sulfurylase) (Sulfate adenylate transferase) (SAT)	-0.349723	-1.99186	1.05609	-0.586045	356.675	46.8711	93.1522	223.309	683.538	156.632	100.847	109.635							XXXMPIPTPHGGKLR
C1_13880C	C1_13880C	Q5AKV1 [249-265]	Q5AKV1 1xPhospho [S261]	Uncharacterized protein	1.43307	0.0439395	-6.127	-7.51613	237797	4.62633e+07	5.1274e+07	7.42889e+07	361580	303773	335303	350626			Y		Y		QQQPTPDSPQLKKFK
C1_13930W	SSK1	Q5AKU6 [320-332]	Q5AKU6 1xPhospho [S]	Oxidative stress response two-component system protein SSK1	-15.3221	-2.87569	-0.0117292	12.4347	40963.4	0	0	0	346.245	40285.5	462.092	5073.05
C1_13930W	SSK1	Q5AKU6 [19-28]	Q5AKU6 1xPhospho [S]	Oxidative stress response two-component system protein SSK1	-1.10241	-0.963952	-1.27163	-1.13317	57458.1	16205.3	12782.2	21525.1	10943.2	19567.1	8479.68	7160.95
C1_13930W	SSK1	Q5AKU6 [179-187]	Q5AKU6 1xPhospho [S182]	Oxidative stress response two-component system protein SSK1	-0.467043	-2.38082	-0.411224	-2.325	46492.1	11165.5	18151.3	23560.6	10128.5	33228.9	4147.49	4176.36					Y		NNIRVPVSPSVNRVS
C1_13930W	SSK1	Q5AKU6 [322-332]	Q5AKU6 1xPhospho [S324]	Oxidative stress response two-component system protein SSK1	-0.317936	-1.4345	-0.966248	-2.08281	35126.8	10217.3	19855.9	16519.6	4477.3	18730.9	5186.37	3399.48						Y	IIKDRSVSPSNLGVS
C1_13930W	SSK1	Q5AKU6 [95-115]	Q5AKU6 1xPhospho [T104]	Oxidative stress response two-component system protein SSK1	0.974812	0	-12.0258	-13.0006	2711.94	1456.94	2669.72	5524.7	0	0	0	0							PDDGNSITPSNSINS
C1_13940W	SIM1	Q5AKU5 [31-36]	Q5AKU5 1xPhospho [T35]	Secreted beta-glucosidase SIM1 (EC 3.2.1.-)	-1.68296	0.272012	-0.277824	1.67715	64.9572	57.4701	16.8646	20.576	0	100.807	48.9984	72.9327							HARRAEVTKVVYVNG
C1_13950C	ATG12	Q5AKU4 [4-28]	Q5AKU4 1xPhospho [S7]	Ubiquitin-like protein ATG12 (Autophagy-related protein 12)	-6.12666	-0.242104	-6.37138	-0.486828	9.44327e+06	1.39294e+07	162381	172121	178983	103329	138142	100556							XMSRIIHSEDDDDDD
C1_13950C	ATG12	Q5AKU4 [4-28]	Q5AKU4 2xPhospho [S7; S17]	Ubiquitin-like protein ATG12 (Autophagy-related protein 12)	13.1033	-0.27457	13.4596	0.0816661	0	0	0	8799.29	7308.77	3955.33	0	9311.81							XMSRIIHSEDDDDDD	DDDDDVGSQSSSSLS
C1_13960W	YBP1	Q5AKU3 [337-348]	Q5AKU3 1xPhospho [S345]	CAP1-binding-protein	-1.70751	-0.389037	1.87402	3.1925	828.078	523.781	216.577	196.651	3953.54	1004.41	1748.69	2037.17							VLTSIVDSDAKAIKD
C1_13960W	YBP1	Q5AKU3 [520-532]	Q5AKU3 1xPhospho [T529]	CAP1-binding-protein	-1.42563	7.63572	-8.81436	0.246988	136.221	312.959	123.068	43.5153	0	0	197.875	0		Y	Y				ISSSSSNTPPKLPPR
C1_13970C	HPC2	Q5AKU2 [110-117]	Q5AKU2 1xPhospho [S112]	Hpc2p	1.85386	-0.570252	1.75706	-0.667052	10831.8	38156.4	52607.8	124470	120288	45298.8	56638.4	54883.6	Y						KPVSKRVSPPVAKSA
C1_13970C	HPC2	Q5AKU2 [111-117]	Q5AKU2 1xPhospho [S112]	Hpc2p	15.7832	-2.41144	17.9407	-0.253895	0	0	31720.2	24669.8	149926	101664	32344.4	14945.8	Y						KPVSKRVSPPVAKSA
C1_13970C	HPC2	Q5AKU2 [267-272]	Q5AKU2 1xPhospho [S267]	Hpc2p	2.11226	-15.7492	1.11446	-16.747	12208.7	13228.9	62908.1	47078.8	24890.7	30186.5	0	0							TTGGLQKSPLLEKKA
C1_13970C	HPC2	Q5AKU2 [288-298]	Q5AKU2 1xPhospho [S290]	Hpc2p	0.690087	-3.43874	1.09071	-3.03812	7686.67	6518.29	11214.1	11704.6	18051.6	12203.1	2789.25	0							SSLKKQSSSLGAITD
C1_14040W	APL1	A0A1D8PFU6 [686-701]	A0A1D8PFU6 1xPhospho [S688]	AP complex subunit beta	-10.3178	-2.55199	2.72069	10.4865	1275.32	0	0	0	8412.34	0	0	1433.64	Y						PALQRRNSFHSGVAT
C1_14040W	APL1	A0A1D8PFU6 [705-716]	A0A1D8PFU6 1xPhospho [S707]	AP complex subunit beta	-1.8473	1.02502	-7.91543	-5.04311	335366	5.84573e+07	172108	1.6167e+07	153150	90372	295527	200039							SRNSKEHSPGAGAGV
C1_14040W	APL1	A0A1D8PFU6 [705-717]	A0A1D8PFU6 1xPhospho [S707]	AP complex subunit beta	1.51841	1.56069	1.23202	1.2743	2500.27	0	7164.53	0	5874.38	0	9108.62	8222.43							SRNSKEHSPGAGAGV
C1_14040W	APL1	A0A1D8PFU6 [717-721]	A0A1D8PFU6 1xPhospho [S719]	AP complex subunit beta	8.20293	-1.00879	2.04552	-7.16621	2225.34	0	6596.93	649427	5648.27	3541.54	2112.36	2454.13							AGVSRRMSYRRTNSD
C1_14040W	APL1	A0A1D8PFU6 [758-764]	A0A1D8PFU6 1xPhospho [S759]	AP complex subunit beta	-19.1598	-2.68588	-3.60285	12.8711	3621.69	582096	0	0	25052.4	23155	7490.92	0	Y						QKFSRKASFITNRIK
C1_14090W	C1_14090W	A0A1D8PFU8 [2-9]	A0A1D8PFU8 1xAcetyl [N-Term]; 1xPhospho [S7]	Uncharacterized protein	-0.878008	-0.61322	-0.879996	-0.615208	123.337	572.339	134.684	243.39	267.501	110.051	133.269	113.205							XMSSILRSAKSLQPL
C1_14090W	C1_14090W	A0A1D8PFU8 [10-17]	A0A1D8PFU8 1xPhospho [S10]	Uncharacterized protein	0.146125	-1.47004	0.908435	-0.707732	36.3162	96.4977	48.891	98.1865	160.881	89.2885	51.213	38.4523			Y				SILRSAKSLQPLFDR
C1_14090W	C1_14090W	A0A1D8PFU8 [29-38]	A0A1D8PFU8 1xPhospho [T/S]	Uncharacterized protein	-0.0122368	-0.639547	0.41233	-0.21498	373.031	454.868	387.613	433.285	760.162	341.965	384.826	322.287
C1_14110C	RPL4B	A0A1D8PFV1 [2-13]	A0A1D8PFV1 1xAcetyl [N-Term]; 1xPhospho [S]	Ribosomal 60S subunit protein L4B	-0.267535	-1.7226	1.52467	0.0696083	30.1025	65.3487	32.9714	46.1542	194.83	81.6803	45.8033	37.2831
C1_14110C	RPL4B	A0A1D8PFV1 [273-289]	A0A1D8PFV1 1xPhospho [S/Y/T]	Ribosomal 60S subunit protein L4B	-1.42846	-2.54261	2.40087	1.28672	22.5865	15.9221	8.41447	5.26403	155.715	51.9384	22.7104	12.1012
C1_14110C	RPL4B	A0A1D8PFV1 [222-232]	A0A1D8PFV1 1xPhospho [S230]	Ribosomal 60S subunit protein L4B	0.962416	-3.98492	6.59492	1.64759	0	0	0	0.948571	93.8512	1.81373	2.95329	2.15176							VPGVETASVKHLGLL
C1_14110C	RPL4B	A0A1D8PFV1 [199-203]	A0A1D8PFV1 1xPhospho [T201]	Ribosomal 60S subunit protein L4B	0.38691	-5.18171	0.975518	-4.5931	5.87462	11.5836	7.99717	15.1387	30.1544	5.14093	0	0							KLRGRRFTQRRGPLV
C1_14140C	SET3	A0A1D8PFV9 [74-85]	A0A1D8PFV9 1xPhospho [S]	Histone-binding protein	0.538804	-2.46606	1.7882	-1.21666	25820.1	18519.5	17071.9	47343.8	24199.9	128945	14996.9	12719.1
C1_14140C	SET3	A0A1D8PFV9 [166-175]	A0A1D8PFV9 1xPhospho [S168]	Histone-binding protein	1.76608	-1.30212	1.32444	-1.74376	66079.7	84379.4	123036	388719	65289.5	311515	90144.7	62660.2							EMKQKSVSPTSGLPK
C1_14140C	SET3	A0A1D8PFV9 [498-512]	A0A1D8PFV9 1xPhospho [S500]	Histone-binding protein	0.0507106	-0.380403	1.49001	1.0589	1623.19	2902.18	502.542	4184.76	2885.68	9827.48	6169.49	3596.82							SPAPKFQSPRPDEMD
C1_14140C	SET3	A0A1D8PFV9 [112-128]	A0A1D8PFV9 1xPhospho [T/S]	Histone-binding protein	1.56046	-2.42462	0.0784099	-3.90667	557.317	1640.46	380.733	6103.51	407.505	1913.08	431.417	0
C1_14140C	SET3	A0A1D8PFV9 [186-196]	A0A1D8PFV9 1xPhospho [T/S]	Histone-binding protein	1.97554	-2.54986	2.1073	-2.41809	8328.81	7551.41	8795.3	53660.6	21878.3	46550.6	6256.56	5428.32
C1_14140C	SET3	A0A1D8PFV9 [285-306]	A0A1D8PFV9 1xPhospho [T291]	Histone-binding protein	1.05302	-2.16188	1.01118	-2.20371	22577.4	26526.8	17378.7	84506.7	16643.5	82329.9	12602.7	9513.64							KSEEDQLTEPEEEDE
C1_14140C	SET3	A0A1D8PFV9 [285-306]	A0A1D8PFV9 1xPhospho [T291]	Histone-binding protein	1.30978	-2.27398	1.765	-1.81875	7101.73	7584.11	7901.96	28506.2	8011.85	41904	5284.77	5035							KSEEDQLTEPEEEDE
C1_14140C	SET3	A0A1D8PFV9 [26-68]	A0A1D8PFV9 1xPhospho [T35]	Histone-binding protein	3.77734	-2.74276	3.61397	-2.90613	3810.84	9992.4	24326.9	164952	41861.8	127153	16295.5	8954.19							SSNQHSPTSNMSSPP
C1_14140C	SET3	A0A1D8PFV9 [164-175]	A0A1D8PFV9 2xPhospho [S166; S/T]	Histone-binding protein	0.626572	-1.72986	1.77004	-0.586393	3514.82	5562.89	2593.25	11422.3	6695.11	24268	6141.19	3192.92							NYEMKQKSVSPTSGL
C1_14140C	SET3	A0A1D8PFV9 [166-176]	A0A1D8PFV9 2xPhospho [S166; S/T]	Histone-binding protein	1.70477	-1.3668	1.22431	-1.84726	0	747.963	404.584	2035.87	425.22	1323.69	427.2	250.329							NYEMKQKSVSPTSGL
C1_14140C	SET3	A0A1D8PFV9 [166-175]	A0A1D8PFV9 2xPhospho [S166; T/S]	Histone-binding protein	0.752503	-1.6944	0.484755	-1.96214	34272.6	51656.7	26449.8	118317	20620.5	99625	21571.8	15581.5							NYEMKQKSVSPTSGL
C1_14140C	SET3	A0A1D8PFV9 [186-196]	A0A1D8PFV9 2xPhospho [S188; T189]	Histone-binding protein	2.09198	-0.662221	4.77163	2.01743	0	610.603	0	2606.46	4049.92	12655.1	6241.25	4314.36			Y	Y		Y	PNHERSRSTPEATIA	NHERSRSTPEATIAK
C1_14220C	FTR2	A0A1D8PFV2 [361-374]	A0A1D8PFV2 1xPhospho [S372]	Ftr2p	0.441179	1.01156	0.14672	0.717101	1.09475e+07	8.45431e+06	9.58236e+06	1.67597e+07	1.23834e+07	9.09534e+06	1.70681e+07	2.62349e+07							QEIDETSSNKLVETQ
C1_14230C	IRR1	A0A1D8PFW4 [938-958]	A0A1D8PFW4 1xPhospho [S/T]	Irr1p	0.0581425	1.31677	0.608904	1.86753	15816.9	0	11179.4	5288	16959.6	7163.34	26319.8	33773.6
C1_14230C	IRR1	A0A1D8PFW4 [929-937]	A0A1D8PFW4 1xPhospho [S932]	Irr1p	1.4589	-13.3955	-0.287057	-15.1414	10082.7	3064.01	23693.6	12448.1	4153.28	6621.18	0	0							YTEKIDESYLQEKSM
C1_14240W	C1_14240W	A0A1D8PFW3 [2-9]	A0A1D8PFW3 1xAcetyl [N-Term]; 1xPhospho [S2]	Uncharacterized protein	-2.22163	-1.72632	3.73927	4.23459	314.552	225.303	0	114.959	4617.76	2604.18	1295.28	886.653							XXXXXXMSAEPEIPK
C1_14240W	C1_14240W	A0A1D8PFW3 [530-545]	A0A1D8PFW3 1xPhospho [S]	Uncharacterized protein	-5.20938	-9.2971	4.08772	0	35.9981	0	0	0	401.495	226.584	0	0
C1_14240W	C1_14240W	A0A1D8PFW3 [15-43]	A0A1D8PFW3 1xPhospho [T/S]	Uncharacterized protein	-1.23804	-1.44469	3.29186	3.08521	193.827	216.551	0	173.402	2716.31	1311.61	686.097	793.012
C1_14250C	C1_14250C	A0A1D8PFX9 [2-20]	A0A1D8PFX9 1xAcetyl [N-Term]; 1xPhospho [S/T]	Uncharacterized protein	0.433255	0.585977	0.0310888	0.183811	3.17402e+06	3.37779e+06	4.42627e+06	4.42049e+06	3.96252e+06	2.73201e+06	4.46366e+06	5.58521e+06
C1_14250C	C1_14250C	A0A1D8PFX9 [860-879]	A0A1D8PFX9 1xPhospho [S]	Uncharacterized protein	1.14871	0.456978	0.332791	-0.358944	1.8658e+06	0	1.75684e+06	2.37994e+06	1.29831e+06	1.05157e+06	1.11162e+06	2.11398e+06
C1_14250C	C1_14250C	A0A1D8PFX9 [726-733]	A0A1D8PFX9 1xPhospho [S728]	Uncharacterized protein	-0.680951	0.987175	0.420888	2.08901	1.17232e+06	2.51148e+06	1.03717e+06	1.26062e+06	2.78172e+06	2.14999e+06	4.10235e+06	5.67376e+06							TSRIRAPSLSPVRQS
C1_14250C	C1_14250C	A0A1D8PFX9 [726-739]	A0A1D8PFX9 2xPhospho [S728; S730]	Uncharacterized protein	-1.18207	0.659191	0.305897	2.14716	1.25279e+06	2.40174e+06	862804	747813	2.7099e+06	1.80779e+06	2.75903e+06	4.37529e+06							TSRIRAPSLSPVRQS	RIRAPSLSPVRQSEN
C1_14260C	TIF35	Q59ZV5 [77-92]	Q59ZV5 1xPhospho [S]	Eukaryotic translation initiation factor 3 subunit G (eIF3g) (Eukaryotic translation initiation factor 3 RNA-binding subunit) (eIF-3 RNA-binding subunit) (Translation initiation factor eIF3 p33 subunit homolog) (eIF3 p33 homolog)	0.332909	0.0102165	1.36474	1.04205	666.953	1170.11	1041.57	1272.56	3371.28	1361.29	2762.38	2003.83
C1_14260C	TIF35	Q59ZV5 [75-92]	Q59ZV5 1xPhospho [S78]	Eukaryotic translation initiation factor 3 subunit G (eIF3g) (Eukaryotic translation initiation factor 3 RNA-binding subunit) (eIF-3 RNA-binding subunit) (Translation initiation factor eIF3 p33 subunit homolog) (eIF3 p33 homolog)	0.428135	-0.145929	3.57351	2.99944	172.717	0	114.015	118.721	1409.13	657.987	584.712	1283.45							KYGKEKNSPPGPDTS
C1_14260C	TIF35	Q59ZV5 [143-173]	Q59ZV5 1xPhospho [T/S]	Eukaryotic translation initiation factor 3 subunit G (eIF3g) (Eukaryotic translation initiation factor 3 RNA-binding subunit) (eIF-3 RNA-binding subunit) (Translation initiation factor eIF3 p33 subunit homolog) (eIF3 p33 homolog)	-1.34235	-2.05551	2.00507	1.29191	4466.35	3791.69	1249.66	2006.53	19756.7	13394.7	4975.34	2998.93
C1_14280C	NPL3	A0A1D8PFV4 [280-286]	A0A1D8PFV4 1xPhospho [S282]	mRNA-binding protein	1.26741	-2.97214	2.88872	-1.35083	404.948	2430.45	2547.76	4279.25	15045.2	5960.48	1376.44	1299.6		Y					GSYDRERSPTRFXXX
C1_14290C	MDG1	A0A1D8PFV7 [2-8]	A0A1D8PFV7 1xAcetyl [N-Term]; 1xPhospho [S/T]	Mdg1p	0.0406213	-1.48392	0.57618	-0.94836	8.78671	4.92066	5.12536	9.002	10.1555	10.7716	1.40828	5.43104
C1_14290C	MDG1	A0A1D8PFV7 [368-383]	A0A1D8PFV7 1xPhospho [S/T]	Mdg1p	-2.04967	-1.52392	0.309589	0.835338	121.359	149.177	25.7821	38.8045	191.178	144.352	66.7699	49.2546
C1_14290C	MDG1	A0A1D8PFV7 [562-578]	A0A1D8PFV7 1xPhospho [S/T]	Mdg1p	-2.00992	-1.16702	-0.134169	0.708741	2800.42	3204.22	609.994	880.121	3100.71	2370.59	1358.72	1077.32
C1_14290C	MDG1	A0A1D8PFV7 [287-323]	A0A1D8PFV7 1xPhospho [S/T]	Mdg1p	-1.41968	-0.251663	-0.490014	0.678002	120.017	58.4475	30.4805	35.6024	101.991	24.7906	50.6034	55.724
C1_14290C	MDG1	A0A1D8PFV7 [419-431]	A0A1D8PFV7 1xPhospho [S/T]	Mdg1p	-0.635288	-1.26636	0.18362	-0.44745	69.3714	75.1044	37.8692	54.7899	94.075	70.1462	38.9191	28.7646
C1_14290C	MDG1	A0A1D8PFV7 [289-323]	A0A1D8PFV7 1xPhospho [S/T]	Mdg1p	-0.612675	0.580006	-1.05799	0.134692	770.631	646.093	393.569	532.599	519.679	160.255	529.791	487.108
C1_14290C	MDG1	A0A1D8PFV7 [419-431]	A0A1D8PFV7 1xPhospho [S/T]	Mdg1p	0.28754	-0.1679	0.298592	-0.156848	3.5032	9.79323	7.90127	8.54834	9.22482	7.35897	9.4099	5.2421
C1_14290C	MDG1	A0A1D8PFV7 [73-84]	A0A1D8PFV7 1xPhospho [S]	Mdg1p	-1.90011	-0.656302	-1.74294	-0.499133	12.1742	43.8568	7.95954	6.32042	10.9824	5.05626	6.24748	3.56358
C1_14290C	MDG1	A0A1D8PFV7 [148-155]; [216-223]	A0A1D8PFV7 1xPhospho [S151]; 1xPhospho [S219]	Mdg1p	-1.88197	-1.62817	0.844845	1.09864	27.1269	17.5032	4.42488	6.95519	53.3092	27.6457	11.0909	14.4214							PKEKDALSAFEKVED
C1_14290C	MDG1	A0A1D8PFV7 [167-189]	A0A1D8PFV7 1xPhospho [S182]	Mdg1p	-0.384767	0.305988	-0.998356	-0.3076	72.3216	78.4053	55.9964	59.2116	43.4835	31.4665	51.1958	41.6986							NAEAQTGSDNQDTLK
C1_14290C	MDG1	A0A1D8PFV7 [384-392]	A0A1D8PFV7 1xPhospho [S387]	Mdg1p	-0.809332	-0.946098	1.81649	1.67973	0.7524	0	0	0	4.23035	0.942013	1.033	1.17067							SIEKPKDSVTEPKLD
C1_14290C	MDG1	A0A1D8PFV7 [520-528]	A0A1D8PFV7 1xPhospho [S524]	Mdg1p	0.500374	-0.387295	0.349828	-0.537841	1128.52	657.177	1150	1376.43	1289.41	986.574	864.443	875.449							EAKEVDASPVVKESR
C1_14290C	MDG1	A0A1D8PFV7 [532-552]	A0A1D8PFV7 1xPhospho [S550]	Mdg1p	0	3.38092	0	3.38092	0	0	0	0	0	0	6.12752	3.28985							IIIAAEGSEKDITAA
C1_14290C	MDG1	A0A1D8PFV7 [368-385]	A0A1D8PFV7 1xPhospho [T/S]	Mdg1p	-2.35758	-2.27794	2.5786	2.65824	4.12508	0	0	0	21.4134	8.20184	2.79874	2.51389
C1_14290C	MDG1	A0A1D8PFV7 [456-485]	A0A1D8PFV7 1xPhospho [T/S]	Mdg1p	-1.44034	0.0115821	0.0710583	1.52298	177.833	173.325	57.2783	71.4847	210.789	158.148	198.29	173.629
C1_14290C	MDG1	A0A1D8PFV7 [287-323]	A0A1D8PFV7 2xPhospho [S/T]	Mdg1p	-0.825588	-0.614907	-0.178106	0.0325749	73.0556	39.466	29.3726	33.6822	73.5887	25.7488	30.721	33.7966
C1_14290C	MDG1	A0A1D8PFV7 [289-323]	A0A1D8PFV7 2xPhospho [S/T]	Mdg1p	-0.50077	0.0905712	-0.732565	-0.141224	540.301	597.487	343.896	459.919	418.312	266.048	404.847	323.918
C1_14290C	MDG1	A0A1D8PFV7 [287-323]	A0A1D8PFV7 3xPhospho [T300; T305; T309]	Mdg1p	-2.23983	-1.06508	0.92175	2.0965	34.3901	37.5269	4.83809	9.59928	87.6948	49.4401	32.4015	32.6196							AAGEANSTSDIDTEE	NSTSDIDTEEATPEP	DIDTEEATPEPTTQA
C1_14290C	MDG1	A0A1D8PFV7 [289-323]	A0A1D8PFV7 3xPhospho [T300; T305; T309]	Mdg1p	0	-3.17749	3.17749	0	0	0	0	0	8.04733	0	0	0							AAGEANSTSDIDTEE	NSTSDIDTEEATPEP	DIDTEEATPEPTTQA
C1_14290C	MDG1	A0A1D8PFV7 [289-323]	A0A1D8PFV7 4xPhospho [T300; T/S]	Mdg1p	0	-2.27499	5.58894	3.31395	0	0	0	0	35.6718	11.4606	5.65265	3.2922							AAGEANSTSDIDTEE
C1_14300C	NCR1	A0A1D8PFW9 [1179-1189]	A0A1D8PFW9 1xPhospho [S]	Sphingolipid transporter	0.226892	0.373466	-0.0173316	0.129242	6151.11	1631.32	4065.25	5042.79	3006.67	4682.82	6033.39	3928.34
C1_14300C	NCR1	A0A1D8PFW9 [1179-1189]	A0A1D8PFW9 2xPhospho [S/T]	Sphingolipid transporter	-9.51521	0.276516	0.304738	10.0965	0	730.754	0	0	532.288	370.57	631.789	462.024
C1_14360C	WSC4	A0A1D8PFX5 [387-394]	A0A1D8PFX5 1xPhospho [S389]	Wsc4p	0.150459	-1.27018	1.31344	-0.107196	2024812	813515	1.5083e+06	1.64203e+06	3.17128e+06	3.88291e+06	1.00051e+06	1.92422e+06							APYSKQSSFSTLKRD
C1_14360C	WSC4	A0A1D8PFX5 [459-473]	A0A1D8PFX5 1xPhospho [S471]	Wsc4p	0	21.1162	0	21.1162	0	0	0	0	0	0	0	2.27311e+06							MFLNQNFSNKSLGDN
C1_14360C	WSC4	A0A1D8PFX5 [474-484]	A0A1D8PFX5 1xPhospho [S474]	Wsc4p	1.25269	-1.12395	1.87514	-0.501506	3.8803e+06	1.66534e+06	4.50416e+06	8.71031e+06	1.23749e+07	7.96849e+06	4.65939e+06	4.6749e+06			Y				NQNFSNKSLGDNQDY
C1_14360C	WSC4	A0A1D8PFX5 [474-483]	A0A1D8PFX5 1xPhospho [S474]	Wsc4p	19.989	-21.8404	21.8404	-19.989	0	0	599182	441425	1.89907e+06	1.8559e+06	0	0			Y				NQNFSNKSLGDNQDY
C1_14390W	RPC10	A0A1D8PFX2 [2-26]	A0A1D8PFX2 1xAcetyl [N-Term]; 1xPhospho [S]	DNA-directed RNA polymerase core subunit	-1.14294	5.89777	-5.48285	1.55786	76803.7	1519.1	32205.4	3261.4	1167.22	583.198	47063.6	57358.7
C1_14440C	GDI1	A0A1D8PFX8 [436-449]	A0A1D8PFX8 1xPhospho [T439]	Rab GDP dissociation inhibitor	0	-7.12758	7.12758	0	0	0	0	0	138.835	0	0	0	Y						VELKKRPTAEEEEAL
C1_14460W	C1_14460W	A0A1D8PFZ8 [285-292]	A0A1D8PFZ8 1xPhospho [S287]	Proteasome regulatory particle lid subunit	0.465863	-1.54394	0.870325	-1.13948	2357.45	1026.48	2564.53	2109.55	4243.4	1943.51	1118.95	1002.17							QDPKKHLSDTAEKLI
C2_00030W	RRN3	Q59L42 [9-18]	Q59L42 1xPhospho [S]	rDNA-binding RNA polymerase I transcriptional factor	0.201304	-0.503324	0.912895	0.208266	7.61459e+06	3.39806e+06	7.61061e+06	5.05105e+06	7.97816e+06	1.27567e+07	8.47001e+06	6.15799e+06
C2_00030W	RRN3	Q59L42 [9-19]	Q59L42 1xPhospho [S11]	rDNA-binding RNA polymerase I transcriptional factor	0.565754	-2.45323	2.18936	-0.829621	2.51089e+06	2.95957e+06	4.11629e+06	3.98087e+06	1.39721e+07	1.09788e+07	2.64754e+06	1.90855e+06							LTRKRVISPSDSPNK
C2_00030W	RRN3	Q59L42 [8-18]	Q59L42 2xPhospho [S11; S13]	rDNA-binding RNA polymerase I transcriptional factor	-0.591649	19.4272	-21.6336	-1.61472	1.91721e+06	1.33635e+06	2.15901e+06	0	0	0	704976	0							LTRKRVISPSDSPNK	RKRVISPSDSPNKKQ
C2_00030W	RRN3	Q59L42 [9-19]	Q59L42 2xPhospho [S11; S13]	rDNA-binding RNA polymerase I transcriptional factor	0.587439	-0.64723	1.62089	0.386218	1.60378e+06	1.59104e+06	3.03969e+06	1.76078e+06	4.80641e+06	5.01971e+06	4.20647e+06	2.06756e+06							LTRKRVISPSDSPNK	RKRVISPSDSPNKKQ
C2_00070C	MPP10	A0A1D8PFZ9 [259-266]	A0A1D8PFZ9 1xPhospho [S263]	U3 small nucleolar ribonucleoprotein protein MPP10	-0.719366	-0.931702	0.344771	0.132435	301.696	216.034	156.408	157.65	460.564	197.197	183.374	160.974			Y				QPKESLSSFEKQQKS
C2_00120C	EMC9	A0A1D8PG01 [329-338]	A0A1D8PG01 1xPhospho [S331]	Emc9p	-0.374886	-0.870304	0.783354	0.287936	1.22413e+07	1.12942e+07	8.38725e+06	9.76251e+06	1.09225e+07	2.9585e+07	9.37458e+06	1.27843e+07							KNRMRASSLSNLAMK
C2_00120C	EMC9	A0A1D8PG01 [329-338]	A0A1D8PG01 1xPhospho [S331]	Emc9p	0.456983	-0.891294	1.06886	-0.279413	1.7789e+06	700310	1.88139e+06	1.52173e+06	1.66246e+06	3.53837e+06	1.47231e+06	1.33162e+06							KNRMRASSLSNLAMK
C2_00140W	NDT80	Q5ACU9 [494-504]	Q5ACU9 1xPhospho [T]	Transcription factor	-0.676281	-0.787938	0.399143	0.287487	40003	9838.25	17361.3	13827.8	22977.4	42749.8	18248.7	19818.2
C2_00140W	NDT80	Q5ACU9 [487-504]	Q5ACU9 1xPhospho [T489]	Transcription factor	-11.2128	-1.05646	0.161107	10.3175	2372.55	0	0	0	1678.45	974.517	527.03	748.027							SSYHKDRTSGYRATN
C2_00140W	NDT80	Q5ACU9 [487-504]	Q5ACU9 2xPhospho [T497; T499]	Transcription factor	-2.3187	-1.6764	1.05903	1.70133	2682.8	0	248.482	288.483	3659.61	1931.19	645.153	1103.31							SGYRATNTPTPTPPQ	YRATNTPTPTPPQXX
C2_00190C	C2_00190C	Q5ACV4 [52-67]	Q5ACV4 1xPhospho [S55]	Peroxisome biogenesis protein	-0.45127	-0.220967	0.733197	0.9635	8768.41	5700.43	5739.05	4843.16	15927.7	8124.77	8892.32	11744.3							LNAKPQSSPLLSSTP
C2_00250W	STF2	A0A1D8PG09 [65-75]	A0A1D8PG09 1xPhospho [S67]	Stf2p	0	-10.0099	10.0099	0	0	0	0	0	1030.04	0	0	0	Y						KSSGRRNSNHEMNQE
C2_00250W	STF2	A0A1D8PG09 [65-75]	A0A1D8PG09 1xPhospho [S67]	Stf2p	0	-5.96599	5.96599	0	0	0	0	0	38.1318	23.3772	0	0	Y						KSSGRRNSNHEMNQE
C2_00250W	STF2	A0A1D8PG09 [66-75]	A0A1D8PG09 1xPhospho [S67]	Stf2p	0	1.44909	6.37774	7.82683	0	0	0	0	82.1554	0	131.367	94.6774	Y						KSSGRRNSNHEMNQE
C2_00250W	STF2	A0A1D8PG09 [65-82]	A0A1D8PG09 1xPhospho [S67]	Stf2p	0.365412	0.034448	0.0989717	-0.231993	13673.7	5371.42	14467.1	10068.1	13708.1	6689.48	9139.37	11751.2	Y						KSSGRRNSNHEMNQE
C2_00250W	STF2	A0A1D8PG09 [65-82]	A0A1D8PG09 1xPhospho [S67]	Stf2p	0.782291	0.879008	-0.0491417	0.0475749	111027	187812	168182	345780	238430	50401.5	271646	259547	Y						KSSGRRNSNHEMNQE
C2_00250W	STF2	A0A1D8PG09 [66-75]	A0A1D8PG09 1xPhospho [S67]	Stf2p	0.978927	-1.33049	1.83126	-0.478164	254.75	324.011	632.659	509.048	1525.18	536.876	459.798	359.54	Y						KSSGRRNSNHEMNQE
C2_00260C	MUQ1	A0A1D8PG14 [129-140]	A0A1D8PG14 1xPhospho [S133]	Ethanolamine-phosphate cytidylyltransferase	0.0625217	-9.99274	1.22628	-8.82898	0	434.478	169.447	284.318	717.387	300.47	0	0							VKRTPNISTTDLVGR
C2_00280C	CWC24	Q5ACW2 [55-63]	Q5ACW2 1xPhospho [S56]	Pre-mRNA-splicing factor CWC24	-4.94193	15.3517	-20.2764	0.0172213	1.26074e+06	9307.86	20421.5	20896.6	0	0	21205.8	20608.5							SVVMPRSSPQTPLSK
C2_00360C	C2_00360C	A0A1D8PG26 [37-50]	A0A1D8PG26 1xPhospho [S/T]	Uncharacterized protein	1.37701	-2.08227	3.44266	-0.0166197	799.498	1204.82	2961.96	2245.46	13021.9	8780.69	3067.42	2080.33
C2_00380C	RFA1	Q5ACX4 [36-45]	Q5ACX4 1xPhospho [S]	Replication protein A subunit	1.22051	-0.374931	1.20184	-0.393595	5959.21	2004.63	13006.8	5552.53	8650.68	9670.11	8314.14	5813.57
C2_00380C	RFA1	Q5ACX4 [137-161]	Q5ACX4 1xPhospho [S144]	Replication protein A subunit	0.262546	0.849138	2.09154	2.67813	737.232	0	0	884.578	2392.39	752.978	3888.84	1778.11							SESRDRESPVPGVTP
C2_00380C	RFA1	Q5ACX4 [141-161]	Q5ACX4 1xPhospho [S144]	Replication protein A subunit	0.790694	-1.24755	5.44006	3.40181	0	280.467	293.894	192.017	9328.74	2889.61	4608.39	536.932							SESRDRESPVPGVTP
C2_00380C	RFA1	Q5ACX4 [36-46]	Q5ACX4 1xPhospho [S40]	Replication protein A subunit	9.85491	0.34596	10.3187	0.809789	0	0	925.027	0	604.166	672.008	1054.16	568.124							NIKAFDVSPSDSKKF
C2_00380C	RFA1	Q5ACX4 [141-161]	Q5ACX4 2xPhospho [S144; T150]	Replication protein A subunit	2.01243	-0.500611	1.91474	-0.598304	529.993	0	945.911	1195.44	1775.38	225.705	722.633	691.454							SESRDRESPVPGVTP	ESPVPGVTPPLAQST
C2_00410C	C2_00410C	A0A1D8PG31 [172-184]	A0A1D8PG31 1xPhospho [S176]	ATP-dependent RNA helicase	7.00166	5.96544	-0.375892	-1.41212	617673	1.02644e+06	1.07388e+08	1.03301e+08	739536	527464	716828	7.84516e+07							DVKDYDDSDEDGSIF
C2_00410C	C2_00410C	A0A1D8PG31 [398-419]	A0A1D8PG31 2xPhospho [S/Y]	ATP-dependent RNA helicase	6.06019	6.51405	2.03816	2.49202	10124.1	0	0	675616	34375.7	7209.49	31257.9	3.76953e+06
C2_00430C	DPB4	A0A1D8PG40 [230-261]	A0A1D8PG40 1xPhospho [S/T]	DNA polymerase epsilon noncatalytic subunit	-0.238127	-1.821	1.45377	-0.129111	43588.7	51664.4	39302.9	41456.9	132092	128830	40513.6	33332.7
C2_00430C	DPB4	A0A1D8PG40 [151-167]	A0A1D8PG40 1xPhospho [S155]	DNA polymerase epsilon noncatalytic subunit	-11.7818	-13.7583	1.97647	0	2173.4	1346.69	0	0	6351.47	7504.05	0	0							KPKLDNESMEIDTED
C2_00430C	DPB4	A0A1D8PG40 [43-59]	A0A1D8PG40 1xPhospho [S46]	DNA polymerase epsilon noncatalytic subunit	-1.68225	0.576734	-1.06651	1.19247	15893	43879.3	6415.67	12208.5	24686.7	3852.42	20651.5	21914.1							KLAKNIISDDENNAG
C2_00430C	DPB4	A0A1D8PG40 [168-196]	A0A1D8PG40 1xPhospho [T185]	DNA polymerase epsilon noncatalytic subunit	0.323057	-3.12013	2.56933	-0.87386	978.827	746.324	1097.12	1061.25	5321.99	4922.27	717.885	459.455							EDDEENSTDGNEEDD
C2_00430C	DPB4	A0A1D8PG40 [230-261]	A0A1D8PG40 2xPhospho [S/T]	DNA polymerase epsilon noncatalytic subunit	-0.491088	1.21132	-1.01745	0.684959	27988.3	40482.2	20461.2	28254.5	19376.5	14446.6	47878.4	30440.4
C2_00430C	DPB4	A0A1D8PG40 [168-196]	A0A1D8PG40 2xPhospho [S/T]	DNA polymerase epsilon noncatalytic subunit	2.34846	-1.93722	4.05875	-0.226933	360.968	0	924.588	917.847	1927.03	4104.17	1050.87	523.248
C2_00430C	DPB4	A0A1D8PG40 [230-261]	A0A1D8PG40 3xPhospho [T239; S249; S250]	DNA polymerase epsilon noncatalytic subunit	-3.70909	-1.4002	1.14619	3.45508	4977.81	4428.69	718.33	0	13311.6	7508.92	4658.32	3229.47							QELQGVETETEAENK	EAENKPDSSETEEEE	AENKPDSSETEEEEE
C2_00450C	CDH1	Q5ACY4 [230-240]	Q5ACY4 1xPhospho [S237]	Cdh1p	-1.20908	-1.86382	-1.45025	-2.10499	1.98287e+07	5.1979e+07	6.49972e+06	2.45602e+07	1.57451e+07	1.05335e+07	650636	6.56936e+06		Y	Y				TNLFTYQSPQKSKPI
C2_00450C	CDH1	Q5ACY4 [247-264]	Q5ACY4 1xPhospho [S256]	Cdh1p	-2.5942	0.529813	-1.46435	1.65966	1.74075e+06	810189	0	422441	0	924456	1.33468e+06	0		Y					QQELYSLSPVRQDSQ
C2_00450C	CDH1	Q5ACY4 [17-30]	Q5ACY4 1xPhospho [S27]	Cdh1p	1.36152	19.3204	-19.202	-1.24311	603086	0	595572	954089	0	0	654673	0		Y	Y		Y		VSFETPRSPSRSTRS
C2_00450C	CDH1	Q5ACY4 [40-52]	Q5ACY4 1xPhospho [S49]	Cdh1p	0.485302	-0.47045	0.359492	-0.59626	1.17573e+07	1.05349e+07	1.35615e+07	1.76449e+07	1.34094e+07	1.51909e+07	1.63732e+07	4.26877e+06		Y					EMGAIQSSPPRRRNN
C2_00540W	C2_00540W	Q5ACZ4 [106-125]	Q5ACZ4 1xPhospho [S116]	Uncharacterized protein	19.9934	2.33097	19.2799	1.61753	0	0	1.04377e+06	0	0	636554	1.40138e+06	1.80141e+06							ASSPAGSSDEDDLEL
C2_00540W	C2_00540W	Q5ACZ4 [106-125]	Q5ACZ4 2xPhospho [S111; S115]	Uncharacterized protein	0.89608	3.46028	-2.01214	0.55206	1.1326e+06	1.0854e+06	1.86282e+06	2.2649e+06	0	549855	4.48057e+06	1.5714e+06							RRISAASSPAGSSDE	AASSPAGSSDEDDLE
C2_00540W	C2_00540W	Q5ACZ4 [105-125]	Q5ACZ4 3xPhospho [S111; S115; S116]	Uncharacterized protein	-0.708093	21.2166	-20.3774	1.54722	666959	695182	0	833805	0	0	1.49355e+06	943282							RRISAASSPAGSSDE	AASSPAGSSDEDDLE	ASSPAGSSDEDDLEL
C2_00570W	C2_00570W	A0A1D8PG45 [370-383]	A0A1D8PG45 1xPhospho [T372]	Uncharacterized protein	-8.98661	-10.6245	1.63785	0	506.27	0	0	0	751.513	826.121	0	0							FVENKNETNPLDNDT
C2_00580C	SMF3	Q5ACZ8 [275-285]	Q5ACZ8 1xPhospho [S277]	Putative divalent metal ion transporter	0.859735	-11.4344	1.51116	-10.783	505.245	464.68	441.123	1319.82	2213.93	552.59	0	0	Y						GSRLRRISDGSLLTN
C2_00580C	SMF3	Q5ACZ8 [276-285]	Q5ACZ8 1xPhospho [S280]	Putative divalent metal ion transporter	0.900802	-0.682441	2.77632	1.19308	0	193.117	0	361.436	812.141	516.757	470.828	356.845			Y				LRRISDGSLLTNKYK
C2_00580C	SMF3	Q5ACZ8 [275-285]	Q5ACZ8 2xPhospho [S277; T/S]	Putative divalent metal ion transporter	0.851957	8.51792	-10.0584	-2.39245	382.865	682.449	466.871	1456.77	0	0	0	365.565	Y						GSRLRRISDGSLLTN
C2_00610C	ATP18	A0A1D8PG50 [32-47]	A0A1D8PG50 1xPhospho [S39]	F1F0 ATP synthase subunit i	0.459942	-0.191216	0.303656	-0.347502	54.3191	66.8291	74.0081	93.0051	99.5597	50.2039	80.7082	50.3407			Y				GSIASANSDEFINDP
C2_00700W	C2_00700W	Q5AD10 [398-404]; Q5AJC2 [312-318]	Q5AD10 1xPhospho [Y398]; Q5AJC2 1xPhospho [Y312]	M-AAA protease subunit	-0.299378	-12.5467	2.29159	-9.95577	280.287	940.819	992.086	0	4295.73	1686.66									FLQNPEKYEKLGAKI
C2_00730C	C2_00730C	A0A1D8PG77 [631-647]	A0A1D8PG77 1xPhospho [S/T]	C2H2-type domain-containing protein	0.0337601	0.670081	0.696486	1.33281	5.18123e+06	7.19773e+06	6.67295e+06	5.99911e+06	1.09471e+07	9.1137e+06	1.72403e+07	1.46796e+07
C2_00790C	C2_00790C	Q5AD22 [2-24]	Q5AD22 1xAcetyl [N-Term]; 1xPhospho [S]	Diacylglycerol kinase	0.753062	-1.12531	2.24283	0.364455	306639	139946	250853	501808	963735	1.15007e+06	472440	496532
C2_00790C	C2_00790C	Q5AD22 [2-10]	Q5AD22 1xAcetyl [N-Term]; 1xPhospho [S]	Diacylglycerol kinase	1.03645	-1.27452	2.14129	-0.169684	964.106	945.934	1758.53	2160.35	3806.47	4623.2	1520.73	1963.19
C2_00790C	C2_00790C	Q5AD22 [97-106]	Q5AD22 1xPhospho [S100]	Diacylglycerol kinase	-2.17969	-2.99253	3.41072	2.59788	3633.56	4609.74	600.813	1217.89	59997.7	27678	5398.65	5616.83							VLEKVANSTTDFSKD
C2_00830C	C2_00830C	A0A1D8PG88 [5-18]	A0A1D8PG88 1xPhospho [S]	Uncharacterized protein	-0.990735	-0.0871041	0.395571	1.2992	1070.84	979.242	522.479	508.67	2091.28	605.841	1377.45	1161.59
C2_00830C	C2_00830C	A0A1D8PG88 [7-18]	A0A1D8PG88 1xPhospho [S]	Uncharacterized protein	0.427433	-0.767318	1.17268	-0.0220709	11976.8	12966.3	17106.2	16438.7	32247.8	23982.8	18428.6	14607
C2_00830C	C2_00830C	A0A1D8PG88 [6-18]	A0A1D8PG88 1xPhospho [S]	Uncharacterized protein	0.894378	0.651354	1.07342	0.830393	505.999	1979.5	1724.33	2896.59	3576.84	1654.77	4342.6	3874.96
C2_00830C	C2_00830C	A0A1D8PG88 [7-19]	A0A1D8PG88 1xPhospho [S]	Uncharacterized protein	2.28399	0.94219	2.2485	0.906701	0	216.776	436.859	622.757	473.988	559.856	1186.92	800.479
C2_00830C	C2_00830C	A0A1D8PG88 [5-18]	A0A1D8PG88 2xPhospho [S]	Uncharacterized protein	0.430039	-0.139936	1.0386	0.468624	1559.99	1347.7	1729.59	2188.21	4163.47	1810.67	3060.92	2360.87
C2_00830C	C2_00830C	A0A1D8PG88 [7-18]	A0A1D8PG88 2xPhospho [S]	Uncharacterized protein	1.66335	-3.44808	3.11325	-1.99818	726.666	0	1171.78	1132.11	3473.81	2821.92	0	575.951
C2_00830C	C2_00830C	A0A1D8PG88 [6-18]	A0A1D8PG88 2xPhospho [S11; S]	Uncharacterized protein	0.793958	1.54386	-0.480978	0.268923	1920.82	3718.12	4172.26	5605.42	2757.53	1282.45	6264.58	5516.83							KRKLSQSSAESSPVK
C2_00830C	C2_00830C	A0A1D8PG88 [7-19]	A0A1D8PG88 2xPhospho [S11; S14]	Uncharacterized protein	0.802061	-5.30654	1.46583	-4.64277	814.009	547.5	1021.26	1353.4	1759	2003.56	94.098	0			Y				KRKLSQSSAESSPVK	LSQSSAESSPVKKST
C2_00830C	C2_00830C	A0A1D8PG88 [5-18]	A0A1D8PG88 3xPhospho [S10; S11; S]	Uncharacterized protein	-0.596766	2.06187	-1.4596	1.19904	1255.54	1419.42	346.896	1421.54	0	971.959	2250.41	1810.97							PKRKLSQSSAESSPV	KRKLSQSSAESSPVK
C2_00890W	C2_00890W	A0A1D8PG78 [222-228]	A0A1D8PG78 1xPhospho [S223]	Uncharacterized protein	-0.367244	-20.4728	-1.05626	-21.1618	1404764	1.62131e+06	846665	1.49933e+06	866245	588925	0	0	Y						EPETKRISIIPSKKL
C2_00970C	UBP13	A0A1D8PG89 [674-690]	A0A1D8PG89 1xPhospho [S/T]	Ubiquitin carboxyl-terminal hydrolase (EC 3.4.19.12)	18.7741	-2.99468	15.1003	-6.66855	0	0	131393	316916	23252.6	11872.8	2677.56	1728.47
C2_00970C	UBP13	A0A1D8PG89 [629-643]	A0A1D8PG89 1xPhospho [S]	Ubiquitin carboxyl-terminal hydrolase (EC 3.4.19.12)	-0.435299	0.0117912	-6.47019	-6.0231	29817478	3.17014e+07	2.12813e+07	2.42144e+07	458198	235684	425938	273639
C2_00970C	UBP13	A0A1D8PG89 [2-17]	A0A1D8PG89 1xPhospho [S4]	Ubiquitin carboxyl-terminal hydrolase (EC 3.4.19.12)	-0.310528	-0.806811	-5.64244	-6.13872	2.33991e+06	2.14444e+06	1.27365e+06	2.3423e+06	56817.5	32956.7	32210.2	19108.3							XXXXMGNSETDNLLF
C2_00970C	UBP13	A0A1D8PG89 [619-628]	A0A1D8PG89 1xPhospho [S627]	Ubiquitin carboxyl-terminal hydrolase (EC 3.4.19.12)	-19.1901	-1.51344	-4.16863	13.5081	598146	0	0	0	26177	7082.18	5985.68	5663.56							DKPPAPISRSNSMNA
C2_01000W	HGT7	A0A1D8PG81 [2-20]	A0A1D8PG81 1xAcetyl [N-Term]; 1xPhospho [S/T]	Hgt7p	0.0964981	-0.481788	0.166202	-0.412084	94173.7	98498.9	81130.6	124870	97200.8	118997	62409	92408
C2_01000W	HGT7	A0A1D8PG81 [2-20]	A0A1D8PG81 1xAcetyl [N-Term]; 2xPhospho [S/T]	Hgt7p	-0.407756	-0.991797	0.577706	-0.00633623	22958.9	24087.5	10779.2	24683.9	36699.9	33516	15339.9	19967.8
C2_01000W	HGT7	A0A1D8PG81 [2-20]	A0A1D8PG81 1xPhospho [S/T]	Hgt7p	-1.03983	-0.963592	-0.198439	-0.122204	23281	25077.2	7700.45	15819.8	22737.5	19406.2	7652.64	13957.3
C2_01000W	HGT7	A0A1D8PG81 [518-546]	A0A1D8PG81 1xPhospho [T/S]	Hgt7p	-0.334507	-0.916416	0.225806	-0.356103	1182.89	1451.85	1064.17	1025.12	1604.29	1477.02	916.219	715.862
C2_01000W	HGT7	A0A1D8PG81 [2-20]	A0A1D8PG81 2xPhospho [S/T]	Hgt7p	-0.491169	-1.09606	0.913601	0.308709	8143.74	8240.59	4600.29	7056.03	15934.8	14930	4698.63	9739.11
C2_01010W	HGT8	A0A1D8PG82 [2-15]	A0A1D8PG82 1xAcetyl [N-Term]; 1xPhospho [S/T]	Hgt8p	0.675598	-3.24602	0.56548	-3.35614	554084	242543	774756	497664	469656	709257	79677.2	44582.1
C2_01010W	HGT8	A0A1D8PG82 [2-15]	A0A1D8PG82 1xAcetyl [N-Term]; 2xPhospho [T4; S]	Hgt8p	1.55528	-2.2831	-0.111524	-3.94991	41154.7	45425.1	113166	141286	48399	31740	11014.9	5449.32							XXXXMSSTNSTENHA
C2_01010W	HGT8	A0A1D8PG82 [2-15]	A0A1D8PG82 1xPhospho [S6]	Hgt8p	0	-11.6475	11.6475	0	0	0	0	0	772.663	2434.51	0	0			Y				XXMSSTNSTENHAVE
C2_01010W	HGT8	A0A1D8PG82 [2-15]	A0A1D8PG82 2xPhospho [T4; S6]	Hgt8p	0	-12.4607	12.4607	0	0	0	0	0	2995.33	2640.76	0	0			Y				XXXXMSSTNSTENHA	XXMSSTNSTENHAVE
C2_01020W	HGT6	Q5AD47 [2-15]	Q5AD47 1xAcetyl [N-Term]; 1xPhospho [S/T]	Hexose transporter	1.71844	-0.428093	3.11492	0.968391	6037.1	2655.55	13013.7	15594.3	51277.4	24037.4	34556.2	21420.8
C2_01020W	HGT6	Q5AD47 [2-15]	Q5AD47 1xAcetyl [N-Term]; 2xPhospho [T7; S]	Hexose transporter	1.77815	-2.00118	4.10848	0.329159	1195.35	0	2062.45	2039.84	14946.1	5689.35	3684.49	1469.41							XMSLDNSTENRDLEE
C2_01020W	HGT6	Q5AD47 [2-15]	Q5AD47 1xPhospho [S]	Hexose transporter	2.49236	-0.435733	4.15567	1.22758	307.065	0	0	1732.47	3951.09	1538.55	2259.81	1798.52
C2_01020W	HGT6	Q5AD47 [2-15]	Q5AD47 2xPhospho [S2; T7]	Hexose transporter	2.24081	-1.66907	4.16359	0.253711	188.628	0	408.254	487.048	2450.22	947.141	620.936	446.698							XXXXXXMSLDNSTEN	XMSLDNSTENRDLEE
C2_01070W	C2_01070W	Q5AD50 [27-37]	Q5AD50 1xPhospho [S28]	DNA-directed RNA polymerase I subunit	-7.46199	-0.0728228	1.63956	9.02872	0	175.312	0	0	368.98	179.357	223.807	297.489							FFNGLRVSPEVEFDL
C2_01110C	BCY1	Q9HEW1 [179-190]	Q9HEW1 1xPhospho [S/T]	cAMP-dependent protein kinase regulatory subunit (PKA regulatory subunit) (PKA-R)	-1.1206	-0.735552	1.10981	1.49486	2628.72	3279.3	1149.74	1566.83	7578.82	5172.88	4012.96	3645.16
C2_01110C	BCY1	Q9HEW1 [147-168]	Q9HEW1 1xPhospho [S149]	cAMP-dependent protein kinase regulatory subunit (PKA regulatory subunit) (PKA-R)	7.19534	0	0	-7.19534	0	0	84.6502	60.9092	0	0	0	0							DDPSKPSSSSQPNQQ
C2_01110C	BCY1	Q9HEW1 [178-190]	Q9HEW1 1xPhospho [T/S]	cAMP-dependent protein kinase regulatory subunit (PKA regulatory subunit) (PKA-R)	-6.63963	-0.599362	2.61597	8.65624	1915	0	18.2162	0	9181.92	2562.84	4157.97	3593.77
C2_01120W	KAR2	A0A1D8PG96 [673-687]	A0A1D8PG96 1xPhospho [S678]	Hsp70 family ATPase	-0.430181	-0.0916172	0.670509	1.00907	53191.2	52909.7	36719.6	42024.9	99302.4	69572	84869.7	73613.9							AKFGDDDSDDEFDHD
C2_01120W	KAR2	A0A1D8PG96 [673-686]	A0A1D8PG96 1xPhospho [S678]	Hsp70 family ATPase	1.21657	-1.9452	1.70796	-1.4538	465.821	164.022	660.919	804.116	1323.57	736.385	321.382	212.805							AKFGDDDSDDEFDHD
C2_01120W	KAR2	A0A1D8PG96 [458-465]	A0A1D8PG96 1xPhospho [T460]	Hsp70 family ATPase	0	-3.79211	8.08583	4.29372	0	0	0	0	140.749	129.942	0	18.6127	Y						TTLIKRNTAIPTKKS
C2_01130W	NOT3	Q5AD56 [330-338]	Q5AD56 1xPhospho [S/T]	General negative regulator of transcription subunit 3	0.365976	-0.75888	-1.26963	-2.39449	339308	328316	70083.7	790319	92153.8	184752	108731	54907.9
C2_01130W	NOT3	Q5AD56 [323-338]	Q5AD56 1xPhospho [S/T]	General negative regulator of transcription subunit 3	0.529029	0.294202	-0.607319	-0.842145	51090.9	50229.9	9954.35	136248	27399.9	39108.3	39121.3	42431.8
C2_01130W	NOT3	Q5AD56 [387-398]	Q5AD56 1xPhospho [S/T]	General negative regulator of transcription subunit 3	0.829236	-0.939698	-0.390638	-2.15957	30940.6	19656.4	6861.24	83037.5	13379.2	25215.6	10517.7	9602.94
C2_01130W	NOT3	Q5AD56 [345-357]	Q5AD56 1xPhospho [S352]	General negative regulator of transcription subunit 3	0.557894	-1.33632	-0.153887	-2.0481	701571	533437	173616	1.64446e+06	302858	807198	228970	210645							ELSVESGSPTTSRSK
C2_01130W	NOT3	Q5AD56 [455-476]	Q5AD56 1xPhospho [T463]	General negative regulator of transcription subunit 3	12.6553	0.627136	9.44105	-2.58707	0	0	719.678	5730.1	694.086	0	0	1072.56							NYQSPAPTQQQQQPQ
C2_01130W	NOT3	Q5AD56 [330-338]	Q5AD56 2xPhospho [S333; S/T]	General negative regulator of transcription subunit 3	-10.7463	15.1948	-10.7463	15.1948	1716.72	0	0	0	0	0	16896.9	20606.3			Y				VTTRTSPSPILTKAN
C2_01130W	NOT3	Q5AD56 [323-338]	Q5AD56 2xPhospho [S333; S/T]	General negative regulator of transcription subunit 3	-1.66024	-12.3508	0.254746	-10.4358	1190.78	3186.15	1384.11	0	1646.05	3576.36	0	0			Y				VTTRTSPSPILTKAN
C2_01130W	NOT3	Q5AD56 [345-357]	Q5AD56 2xPhospho [S347; S/T]	General negative regulator of transcription subunit 3	1.43269	-0.935722	-0.440966	-2.80938	5020.39	6428.35	1502.52	29405	2771.68	5661.66	2694.08	1714.23				Y			NGHIKELSVESGSPT
C2_01150W	PEX12	A0A1D8PGB2 [394-417]	A0A1D8PGB2 2xPhospho [S408; Y/S]	Ubiquitin-protein ligase peroxin 12	0	-0.987595	23.124	22.1364	0	0	0	0	6.12744e+06	3.01394e+06	2.35948e+06	2.25068e+06							NIYSEDESEDENIEN
C2_01170C	C2_01170C	A0A1D8PGA1 [209-233]	A0A1D8PGA1 1xPhospho [S/T]	Uncharacterized protein	1.05326	1.37453	-0.0547199	0.26655	11100.3	13638.5	29052.8	22286.6	10228.1	13590	26189.8	35567.9
C2_01170C	C2_01170C	A0A1D8PGA1 [68-77]	A0A1D8PGA1 1xPhospho [S70]	Uncharacterized protein	0.304452	0.0265005	-0.957001	-1.23495	42944.6	22957.8	24158.4	57227.9	14535.2	19412.4	15990.2	18586.8				Y			RGHRRTGSAISTNYR
C2_01170C	C2_01170C	A0A1D8PGA1 [777-788]	A0A1D8PGA1 1xPhospho [S783]	Uncharacterized protein	0	2.28418	10.2403	12.5245	0	0	0	0	0	1208.58	0	5890.71							KDFDFYESDDQEKDT
C2_01170C	C2_01170C	A0A1D8PGA1 [209-233]	A0A1D8PGA1 2xPhospho [S/T]	Uncharacterized protein	-1.88779	1.6516	-1.08357	2.45583	103558	53182.4	18206.3	24147.5	49468.6	24490.6	125000	107369
C2_01180W	COX17	A0A1D8PGA3 [41-51]	A0A1D8PGA3 1xPhospho [S41]	Copper metallochaperone	0.454204	-0.312494	1.59625	0.829554	843.746	615.671	1108.71	891.101	3224.31	1190.36	1853.47	1701.25							IESEECKSIINQYTS
C2_01180W	COX17	A0A1D8PGA3 [52-61]	A0A1D8PGA3 1xPhospho [T56]	Copper metallochaperone	7.71069	0.11537	9.09695	1.50163	0	0	118.763	89.7196	412.655	133.933	245.699	346.477							CMKSYGFTPNPINXX
C2_01200C	REG1	A0A1D8PGA2 [843-872]	A0A1D8PGA2 1xPhospho [S/T/Y]	Protein phosphatase regulator	-0.749256	0.101058	-0.199174	0.65114	342.065	48.8637	127.338	104.824	191.165	149.224	223.172	141.988
C2_01200C	REG1	A0A1D8PGA2 [795-818]	A0A1D8PGA2 1xPhospho [S/T]	Protein phosphatase regulator	-2.00161	-1.44667	-1.00885	-0.453919	724.131	486.502	86.5878	214.984	327.556	273.554	120.497	99.3972
C2_01200C	REG1	A0A1D8PGA2 [361-371]	A0A1D8PGA2 1xPhospho [S]	Protein phosphatase regulator	-1.09203	-1.11175	-0.584176	-0.603895	85.3443	99.2003	0	86.0393	76.3366	46.4272	0	56.2697
C2_01200C	REG1	A0A1D8PGA2 [376-405]	A0A1D8PGA2 1xPhospho [S]	Protein phosphatase regulator	-0.659369	-2.19667	-0.180043	-1.71735	496.903	296.879	206.262	295.958	576.093	124.442	79.9985	72.0346
C2_01200C	REG1	A0A1D8PGA2 [210-220]	A0A1D8PGA2 1xPhospho [S212]	Protein phosphatase regulator	-2.17459	-7.74957	-2.29205	-7.86702	536.875	516.092	129.707	102.751	92.2715	121.933	0	0							RSNLKTISPEVVNWS
C2_01200C	REG1	A0A1D8PGA2 [38-49]	A0A1D8PGA2 1xPhospho [S38]	Protein phosphatase regulator	-1.10855	-5.20285	-0.701842	-4.79614	156.596	157.937	31.7224	113.61	105.745	87.2404	1.66564	2.60127							FKLKRTRSMGLLDEF
C2_01200C	REG1	A0A1D8PGA2 [787-794]	A0A1D8PGA2 1xPhospho [S788]	Protein phosphatase regulator	-1.27198	-4.9182	0.170661	-3.47556	158.33	63.3473	33.0672	58.1412	185.845	63.7947	7.28942	0							SSINPRYSSTSISKQ
C2_01200C	REG1	A0A1D8PGA2 [860-872]	A0A1D8PGA2 1xPhospho [S864]	Protein phosphatase regulator	-0.34126	-0.176417	-0.623588	-0.458745	889.729	1362.28	705.588	1071.83	666.594	794.732	542.126	750.883							PNRDYTPSPDNNTLT
C2_01200C	REG1	A0A1D8PGA2 [873-880]	A0A1D8PGA2 1xPhospho [S875]	Protein phosphatase regulator	0.242393	-0.656625	-0.614279	-1.5133	4.33866	16.4514	0	24.7766	4.87891	8.35557	3.6267	4.40309							NTLTRTLSNTSKKSS
C2_01200C	REG1	A0A1D8PGA2 [343-354]	A0A1D8PGA2 1xPhospho [T/S]	Protein phosphatase regulator	-0.979106	-2.0642	-0.689983	-1.77507	534.021	364.693	99.6377	355.782	376.176	180.522	62.3223	70.0342
C2_01200C	REG1	A0A1D8PGA2 [843-872]	A0A1D8PGA2 2xPhospho [T/S/Y]	Protein phosphatase regulator	-1.54981	0.109597	-0.65173	1.00767	626.797	627.339	153.208	274.491	459.266	338.649	481.841	379.13
C2_01200C	REG1	A0A1D8PGA2 [860-872]	A0A1D8PGA2 2xPhospho [T862; S864]	Protein phosphatase regulator	0.0485447	-0.645177	0.308171	-0.385551	71.6142	34.165	48.6581	60.7752	65.5607	65.6467	46.768	36.7673							QVPNRDYTPSPDNNT	PNRDYTPSPDNNTLT
C2_01210C	HNM1	A0A1D8PGA9 [2-28]	A0A1D8PGA9 1xPhospho [S/T]	Hnm1p	-0.61556	-0.0465139	0.696247	1.26529	235977	284521	170900	168816	600907	242449	505350	311249
C2_01210C	HNM1	A0A1D8PGA9 [39-48]	A0A1D8PGA9 1xPhospho [S]	Hnm1p	-0.181454	-2.07347	2.19412	0.302105	53428.2	52600.1	50641	42856.1	378986	106215	81410	33866.8
C2_01210C	HNM1	A0A1D8PGA9 [39-48]	A0A1D8PGA9 2xPhospho [S42; T/S]	Hnm1p	9.49408	-12.0587	12.0587	-9.49408	0	0	397.574	322.539	4265.02	0	0	0			Y				DDNKSVTSKDEDTKM
C2_01210C	HNM1	A0A1D8PGA9 [2-28]	A0A1D8PGA9 2xPhospho [T/S]	Hnm1p	-1.73244	-1.97005	1.86136	1.62375	41556.4	93831.3	16727.7	24015.5	412183	79751.6	70253	55309.6
C2_01210C	HNM1	A0A1D8PGA9 [30-48]	A0A1D8PGA9 2xPhospho [T/S]	Hnm1p	-0.468609	0.343457	1.0874	1.89947	26305.8	21075.3	14559.2	19680.9	79653.1	21028.6	69970.1	57774.5
C2_01250W	C2_01250W	Q5AD68 [99-115]	Q5AD68 2xPhospho [S107; S111]	Uncharacterized protein	-7.59257	21.1156	-20.4889	8.2193	1.47153e+06	0	7622.91	0	0	0	2.25859e+06	13547.4					Y		PLNLIPSSPPESPNA	IPSSPPESPNARDST
C2_01340W	C2_01340W	A0A1D8PGD2 [509-524]	A0A1D8PGD2 1xPhospho [S514]	Uncharacterized protein	-1.33192	-1.10739	0.963568	1.1881	15276.4	25715.6	4838.04	11444.9	59812	20128.5	22828.6	14273.9							QRQVERDSFELPTTT
C2_01340W	C2_01340W	A0A1D8PGD2 [513-524]	A0A1D8PGD2 1xPhospho [S514]	Uncharacterized protein	0.170151	1.62447	-0.876154	0.578161	4394.35	7353.3	7772.08	5446.22	4679.51	1720.37	10955.3	8779.36							QRQVERDSFELPTTT
C2_01340W	C2_01340W	A0A1D8PGD2 [527-571]	A0A1D8PGD2 1xPhospho [S562]	Uncharacterized protein	-6.81189	-0.808481	2.33018	8.33359	111.352	0	0	0	0	563.986	321.597	0							LGEDDEISDHEGDNR
C2_01350C	SNX4	Q5AD77 [52-68]	Q5AD77 1xPhospho [S]	Sorting nexin-4 (Autophagy-related protein 24)	-0.350273	1.28801	-0.147588	1.4907	2305.84	1663.84	1601.71	1512.03	2735.85	847.716	3252.2	5500
C2_01350C	SNX4	Q5AD77 [52-68]	Q5AD77 1xPhospho [S53]	Sorting nexin-4 (Autophagy-related protein 24)	8.70091	-5.6415	5.6415	-8.70091	0	0	198.674	216.461	0	48.9182	0	0							KKNGNKISPSSTTET
C2_01350C	SNX4	Q5AD77 [52-68]	Q5AD77 2xPhospho [S/T]	Sorting nexin-4 (Autophagy-related protein 24)	0.550556	-7.39084	-2.15763	-10.099	747.816	0	551.371	544.383	0	166.828	0	0
C2_01390W	C2_01390W	A0A1D8PGB7 [431-443]	A0A1D8PGB7 1xPhospho [T431]	Epsin	1.58035	-1.47771	1.30525	-1.75282	0	9466.85	11183.9	17128	15110.6	8285.94	4874.76	3525.3							IPHQHTKTQNFINSS
C2_01400C	ESC4	Q5ALY1 [495-511]	Q5ALY1 1xPhospho [S/T]	Esc4p	0.400226	1.07726	-0.0358329	0.641197	31057.6	270.05	12861.4	28482.5	21992.3	8566.79	33765.4	30715.9
C2_01400C	ESC4	Q5ALY1 [556-570]	Q5ALY1 1xPhospho [S]	Esc4p	5.69402	12.4416	-5.80239	0.94518	0	54.8077	0	2888.11	0	0	2648.11	2913.66
C2_01400C	ESC4	Q5ALY1 [512-535]	Q5ALY1 1xPhospho [S527]	Esc4p	0.317966	0.606896	0.47648	0.765409	106547	680.861	58297.6	75369.6	85942.5	63248.4	144254	82961.3					Y		QPANQPVSPISTTSN
C2_01400C	ESC4	Q5ALY1 [539-555]	Q5ALY1 1xPhospho [T]	Esc4p	0.261924	0.744839	0.484734	0.967648	64242.3	416.387	29752.5	47778.4	52661.3	37817.7	99202.8	52421.5
C2_01400C	ESC4	Q5ALY1 [611-624]	Q5ALY1 1xPhospho [T621]	Esc4p	0.711788	0.609031	-0.0568971	-0.159654	23989.4	147.412	12515.1	27017.6	11932.7	11270.7	24156	11235.2		Y					DQLEGSLTPSKKRKH
C2_01400C	ESC4	Q5ALY1 [512-535]	Q5ALY1 2xPhospho [S/T]	Esc4p	-4.58642	-2.14895	-1.13146	1.306	110960	66.8597	1374.95	3245.55	35669.2	15008.9	6043.29	5382.63
C2_01400C	ESC4	Q5ALY1 [556-570]	Q5ALY1 2xPhospho [S/T]	Esc4p	0.123477	1.61821	-0.18661	1.30812	40528.7	328.582	13671.8	30836.5	26045.4	9854.45	66882.2	43330.4
C2_01400C	ESC4	Q5ALY1 [539-555]	Q5ALY1 2xPhospho [T/S]	Esc4p	-1.47217	0.285435	-0.533685	1.22392	21399.1	84.0604	4056.76	3685.99	8285.15	6554.85	9970.32	8116.56
C2_01400C	ESC4	Q5ALY1 [495-511]	Q5ALY1 2xPhospho [T/S]	Esc4p	-0.371403	-0.0201755	0.370441	0.721668	56061.8	289.576	14834	28727.1	49278.3	23570.2	49076.5	22760.3
C2_01400C	ESC4	Q5ALY1 [512-535]	Q5ALY1 3xPhospho [S518; S519; S527]	Esc4p	-0.837886	0.118986	-0.657087	0.299784	3020.01	0	0	1689.14	1914.8	0	0	2079.5			Y		Y		KNIVTPSSSQPANQP	NIVTPSSSQPANQPV	QPANQPVSPISTTSN
C2_01400C	ESC4	Q5ALY1 [556-570]	Q5ALY1 3xPhospho [S561; S562; S]	Esc4p	-13.3438	-2.32776	1.20884	12.2249	10279.4	115.853	0	0	19299.9	4730.19	0	4785.82							QKEFSRESSSSPIIA	KEFSRESSSSPIIAT
C2_01400C	ESC4	Q5ALY1 [556-570]	Q5ALY1 4xPhospho [S561; S562; S563; S]	Esc4p	1.19756	-2.81636	1.15636	-2.85757	7890.4	68.8936	0	18256.1	12363.4	5378.63	0	2517.94							QKEFSRESSSSPIIA	KEFSRESSSSPIIAT	EFSRESSSSPIIATK
C2_01420C	C2_01420C	A0A1D8PGB8 [1-10]	A0A1D8PGB8 1xAcetyl [N-Term]; 1xPhospho [S/T]	Uncharacterized protein	-2.19637	-1.87023	-1.59564	-1.2695	3608.04	5232.67	583.603	1344.53	2924.49	0	799.209	0
C2_01420C	C2_01420C	A0A1D8PGB8 [73-86]	A0A1D8PGB8 1xPhospho [S]	Uncharacterized protein	0.0256833	-1.60589	-0.409832	-2.04141	7104.83	3176.67	2248.32	8217.87	4693.98	3044.76	1154.69	1387.07
C2_01420C	C2_01420C	A0A1D8PGB8 [101-108]	A0A1D8PGB8 1xPhospho [S105]	Uncharacterized protein	-0.84074	0	-11.1198	-10.2791	2224.35	0	516.065	725.477	0	0	0	0		Y					SPKKLATSPTKNYTD
C2_01420C	C2_01420C	A0A1D8PGB8 [11-21]	A0A1D8PGB8 1xPhospho [S17]	Uncharacterized protein	-0.406613	-1.39557	-0.00483488	-0.993793	72472	22376	21458.4	50094	46785	47745.7	18128.4	17801.5							KSFTLEQSPEIKPKP
C2_01420C	C2_01420C	A0A1D8PGB8 [11-23]	A0A1D8PGB8 1xPhospho [S17]	Uncharacterized protein	0.499518	0.0833382	-1.29554	-1.71172	44715.5	27112.9	21011.8	80535.5	23212.4	6048.71	16566.1	14435.1							KSFTLEQSPEIKPKP
C2_01420C	C2_01420C	A0A1D8PGB8 [74-86]	A0A1D8PGB8 1xPhospho [S75]	Uncharacterized protein	-0.384866	8.95665	-11.3502	-2.00864	1689.95	919.641	529.76	1468.56	0	0	0	495.844	Y						PIKRKRQSAQSAPPP
C2_01420C	C2_01420C	A0A1D8PGB8 [95-100]	A0A1D8PGB8 1xPhospho [S98]	Uncharacterized protein	-1.67548	-14.6247	0.641285	-12.308	8043.14	8153.08	1841.56	3228.18	13554.9	11707.2	0	0		Y					IPQKPTLSPKKLATS
C2_01420C	C2_01420C	A0A1D8PGB8 [95-101]	A0A1D8PGB8 1xPhospho [S98]	Uncharacterized protein	1.28493	-1.14563	0.0887799	-2.34178	21020.2	17589.9	37737.9	56345.1	23082.3	17978.5	10063.7	8494.96		Y					IPQKPTLSPKKLATS
C2_01420C	C2_01420C	A0A1D8PGB8 [55-70]	A0A1D8PGB8 1xPhospho [T/S]	Uncharacterized protein	-0.217957	-0.408495	-1.98964	-2.18018	6490.69	5103.86	1789.91	8178.74	1188.86	1729.91	1242.47	956.309
C2_01420C	C2_01420C	A0A1D8PGB8 [316-337]	A0A1D8PGB8 1xPhospho [T]	Uncharacterized protein	-0.25131	0.153177	-0.792008	-0.38752	5290.54	2149.02	1563.57	4686.49	1856.72	2439.5	2473.22	2304.35
C2_01420C	C2_01420C	A0A1D8PGB8 [526-536]	A0A1D8PGB8 1xPhospho [T529]	Uncharacterized protein	-0.228372	-0.549117	0.0352868	-0.285458	16854	9370.42	8357.67	14027.3	12408.2	14465.6	9985.84	8380.41							CLNKGDFTMSEFMGR
C2_01420C	C2_01420C	A0A1D8PGB8 [526-536]	A0A1D8PGB8 1xPhospho [T529]	Uncharacterized protein	-0.111539	-0.759298	0.166176	-0.481584	4185.69	1260.14	1841.8	3198.78	3543.17	2567.61	1783.06	1826.68							CLNKGDFTMSEFMGR
C2_01420C	C2_01420C	A0A1D8PGB8 [55-70]	A0A1D8PGB8 2xPhospho [T67; S]	Uncharacterized protein	-0.492048	-0.392627	-0.834129	-0.734708	12291.2	12882.2	4984.7	12913.7	8897.41	5222.47	5917.86	4837.6		Y					SDSEHDLTPIKRKRQ
C2_01420C	C2_01420C	A0A1D8PGB8 [55-70]	A0A1D8PGB8 3xPhospho [S62; T67; S/Y]	Uncharacterized protein	-0.721016	-0.419647	-2.13632	-1.83495	13514.9	6121.46	2114.42	9798.01	2627.85	1837.87	1761.54	1576.81							YDQNISDSEHDLTPI	SDSEHDLTPIKRKRQ
C2_01430W	APT1	Q5ALX8 [2-13]	Q5ALX8 1xAcetyl [N-Term]; 1xPhospho [S2]	Adenine phosphoribosyltransferase (APRT) (EC 2.4.2.7)	-0.0239347	0.6754	0.093179	0.792514	98.8721	82.3469	89.6753	88.5456	97.8434	95.5329	149.166	160.26							XXXXXXMSDRVLEIN
C2_01440C	C2_01440C	A0A1D8PGE0 [2-11]	A0A1D8PGE0 1xAcetyl [N-Term]; 1xPhospho [S/T]	Dynein light chain	-0.132924	-0.978734	0.289479	-0.55633	593.486	625.858	558.673	553.257	925.251	565.252	420.147	335.679
C2_01440C	C2_01440C	A0A1D8PGE0 [2-11]	A0A1D8PGE0 1xPhospho [S2]	Dynein light chain	-1.17261	5.16345	-6.65963	-0.323569	0	100.1	0	43.8496	0	0	34.8389	0							XXXXXXMSEETSVPI
C2_01470W	SSN2	Q5ALX5 [1337-1346]	Q5ALX5 1xPhospho [S1345]	Mediator of RNA polymerase II transcription subunit 13 (Mediator complex subunit 13)	0	-1.56195	13.7289	12.1669	0	0	0	0	0	13575.8	0	4597.37							WYCSDSVSKSEKSTY
C2_01480W	SPT5	Q5ALX3 [2-11]	Q5ALX3 1xAcetyl [N-Term]; 1xPhospho [S]	Transcription elongation factor SPT5 (Chromatin elongation factor SPT5)	-1.94774	-3.90797	-1.48607	-3.4463	25530.8	26045.4	6290.1	7078.85	11200.9	7210.33	677.32	548.245
C2_01480W	SPT5	Q5ALX3 [50-63]	Q5ALX3 1xPhospho [S/T]	Transcription elongation factor SPT5 (Chromatin elongation factor SPT5)	-4.22465	-3.749	-0.714503	-0.238862	1486.66	477.777	72.8441	31.2828	840.058	356.708	41.5229	46.5631
C2_01480W	SPT5	Q5ALX3 [2-11]	Q5ALX3 1xPhospho [S]	Transcription elongation factor SPT5 (Chromatin elongation factor SPT5)	-1.71218	-0.11791	-1.20559	0.388673	1065.52	1186.43	370.554	316.045	605.641	370.218	497.619	401.578
C2_01480W	SPT5	Q5ALX3 [1-11]	Q5ALX3 1xPhospho [S2]	Transcription elongation factor SPT5 (Chromatin elongation factor SPT5)	-3.39505	-0.172154	-3.14577	0.0771204	318.367	816.978	40.7115	66.3072	76.2252	51.1667	74.4328	38.5172							XXXXXXMSDSDLPVQ
C2_01480W	SPT5	Q5ALX3 [51-63]	Q5ALX3 1xPhospho [S55]	Transcription elongation factor SPT5 (Chromatin elongation factor SPT5)	0	-3.8302	3.8302	0	0	0	0	0	8.84222	4.3812	0	0							LKRTREESEQEENNE
C2_01480W	SPT5	Q5ALX3 [884-891]	Q5ALX3 1xPhospho [S887]	Transcription elongation factor SPT5 (Chromatin elongation factor SPT5)	3.86555	-0.0775402	5.61873	1.67564	0	0	0	13.5762	21.8686	26.2681	23.8746	21.6909							GGIKGAGSVWDRSKG
C2_01550W	SMP2	Q5ALW4 [148-156]	Q5ALW4 1xPhospho [S/T]	Phosphatidate phosphatase	1.65872	-0.649015	2.72145	0.413715	787.28	1510.46	4233.03	3023.96	10565.9	4594.19	4859.99	4807.46
C2_01550W	SMP2	Q5ALW4 [641-658]	Q5ALW4 1xPhospho [S/T]	Phosphatidate phosphatase	2.38657	1.05363	0.723955	-0.608991	762.18	1153.39	4641.38	5379.65	2069.6	1095.01	3058.48	3511.51
C2_01550W	SMP2	Q5ALW4 [668-686]	Q5ALW4 1xPhospho [S/Y]	Phosphatidate phosphatase	1.49071	-4.00564	4.32964	-1.16671	789.466	192.445	1845.72	915.517	14728.9	5033.75	281.906	947.498
C2_01550W	SMP2	Q5ALW4 [546-554]	Q5ALW4 1xPhospho [S]	Phosphatidate phosphatase	1.30068	-1.17444	2.38042	-0.0947002	3356.09	5269.92	12316.3	8934.98	28180.3	16738.5	9489.37	10411.7
C2_01550W	SMP2	Q5ALW4 [140-147]	Q5ALW4 1xPhospho [S145]	Phosphatidate phosphatase	1.14096	-0.566033	2.53328	0.826281	3864.13	3148.62	9328.1	6138.19	14865.3	25735.2	13863.6	13560.5							IKLSDIPSPRSKSPT
C2_01550W	SMP2	Q5ALW4 [672-686]	Q5ALW4 1xPhospho [S675]	Phosphatidate phosphatase	1.2942	-4.73302	4.41158	-1.61564	510.397	89.201	1036.23	435.683	6800.72	5980.33	196.668	282.973							DNSKDDDSDYGNEQL
C2_01550W	SMP2	Q5ALW4 [770-778]	Q5ALW4 1xPhospho [S772]	Phosphatidate phosphatase	2.75423	-12.0313	4.5669	-10.2186	175.608	0	828.393	362.169	2404.09	1780.76	0	0							GSNSKELSAEDVEKL
C2_01550W	SMP2	Q5ALW4 [150-156]	Q5ALW4 1xPhospho [T/S]	Phosphatidate phosphatase	1.43941	-2.33244	2.96655	-0.805301	2841.41	1381.96	7602.06	3853.86	17023.4	15996	2448.18	4106.96
C2_01550W	SMP2	Q5ALW4 [148-156]	Q5ALW4 2xPhospho [S150; T/S]	Phosphatidate phosphatase	1.04614	-1.05186	2.88782	0.789824	415.571	378.358	662.429	978.093	5525.98	356.718	1063.91	1773.06						Y	IPSPRSKSPTPSLKT
C2_01550W	SMP2	Q5ALW4 [546-554]	Q5ALW4 2xPhospho [S552; T/S]	Phosphatidate phosphatase	3.12186	-0.402087	3.27187	-0.252075	65.3271	49.5497	584.828	422.889	543.642	574.608	357.923	488.084							RTPSPLGSPRSPGSP
C2_01550W	SMP2	Q5ALW4 [641-658]	Q5ALW4 2xPhospho [S652; S/T]	Phosphatidate phosphatase	0.795959	-0.932401	3.18961	1.46125	93.6251	59.5139	0	266.621	1011.23	394.073	203.902	531.983							ERPTSGSSFTSPLKS
C2_01550W	SMP2	Q5ALW4 [546-560]	Q5ALW4 3xPhospho [S555; S/T]	Phosphatidate phosphatase	1.7136	0.679676	1.682	0.648074	154.575	279.527	690.524	735.518	597.684	797.439	1062.83	1172.45					Y		SPLGSPRSPGSPRSV
C2_01590W	COX13	Q5ALV9 [120-129]	Q5ALV9 1xPhospho [T120]	Cytochrome c oxidase subunit 6A, mitochondrial (Cytochrome c oxidase polypeptide VIa)	-7.64523	2.82191	-4.12247	6.34467	24.6592	174.531	0	0	10.4936	0	37.8286	42.4424							FWGDGDKTLFWNSDV
C2_01600C	CDC55	Q5ALV8 [431-448]	Q5ALV8 1xPhospho [S/Y]	Protein phosphatase PP2A regulatory subunit B	2.50622	0.338983	1.61806	-0.549179	223213	202204	2.04539e+06	371547	1.05174e+06	254136	934602	717154
C2_01600C	CDC55	Q5ALV8 [463-471]	Q5ALV8 1xPhospho [S464]	Protein phosphatase PP2A regulatory subunit B	0	-12.2648	12.2648	0	0	0	0	0	4920.08	0	0	0	Y						AFKSKKISPHTVSGR
C2_01600C	CDC55	Q5ALV8 [462-471]	Q5ALV8 1xPhospho [S464]	Protein phosphatase PP2A regulatory subunit B	12.5169	1.0517	11.8813	0.416076	0	0	5859.9	0	3771.44	0	4773.05	3046.11	Y						AFKSKKISPHTVSGR
C2_01600C	CDC55	Q5ALV8 [431-448]	Q5ALV8 2xPhospho [S/Y]	Protein phosphatase PP2A regulatory subunit B	2.32098	-0.097733	1.25834	-1.16038	46018.3	27697	296922	71416.4	138774	37569.5	92453.8	72338.9
C2_01600C	CDC55	Q5ALV8 [425-448]	Q5ALV8 2xPhospho [S/Y]	Protein phosphatase PP2A regulatory subunit B	2.89076	-0.0174671	1.55179	-1.35644	9663.16	6525.74	86073.7	33999.6	40602.5	6862.11	26535.5	20357.8
C2_01620W	COX4	Q5ALV5 [39-55]	Q5ALV5 1xPhospho [S48]	Cytochrome c oxidase subunit IV	3.10623	-3.95449	3.95449	-3.10623	0	0	0	7.61129	8.61072	5.89246	0	0							AEVTGAASLIGPGAK
C2_01640W	SLA1	Q5ALV2 [192-204]	Q5ALV2 1xPhospho [S194]	Actin cytoskeleton-regulatory complex protein SLA1	3.47588	0.899861	3.84383	1.26781	338.741	440.497	3349.66	5330.38	7797.18	3404.81	11858.9	9043.6							PPAHRDRSPEHPPPT
C2_01640W	SLA1	Q5ALV2 [319-328]	Q5ALV2 1xPhospho [S321]	Actin cytoskeleton-regulatory complex	4.02012	-0.069187	4.13854	0.0492359	156.031	193.748	2994.92	2695.35	4265.12	1912.02	3407.49	2480.36						Y	KLRMRSSSSLDNQWR
C2_01640W	SLA1	Q5ALV2 [740-749]	Q5ALV2 1xPhospho [S743]	Actin cytoskeleton-regulatory complex protein SLA1	3.24899	-6.34768	6.34768	-3.24899	0	0	8.50699	0	80.4408	0	0	0							GNLKNNSSSTEISKV
C2_01640W	SLA1	Q5ALV2 [750-760]	Q5ALV2 1xPhospho [S757]	Actin cytoskeleton-regulatory complex protein SLA1	4.08317	-0.557331	4.48769	-0.152807	287.995	66.0176	2844.52	3171.75	3225.81	4737.95	3041.15	2370.37		Y					VSADALPSPVKTQVT
C2_01640W	SLA1	Q5ALV2 [788-798]	Q5ALV2 1xPhospho [S792]	Actin cytoskeleton-regulatory complex protein SLA1	3.15033	-0.276175	3.11036	-0.316142	717.753	531.535	3195.24	7904.55	7297.66	3498.83	5034.54	3880.78							AMKPAARSSEDLLKP
C2_01640W	SLA1	Q5ALV2 [1022-1038]	Q5ALV2 1xPhospho [T1022]	Actin cytoskeleton-regulatory complex protein SLA1	-3.62778	-1.87857	6.66607	8.41528	11.3615	0	0	0	991.967	262.362	114.446	225.945			Y				ALVPTQRTGGQITGG
C2_01640W	SLA1	Q5ALV2 [194-204]	Q5ALV2 1xPhospho [T201]	Actin cytoskeleton-regulatory complex protein SLA1	3.27673	-0.608177	3.17429	-0.71062	6.99356	5.34602	43.8188	84.463	69.4641	49.956	43.8184	34.1802		Y			Y		SPEHPPPTPEKDYPR
C2_01640W	SLA1	Q5ALV2 [869-877]	Q5ALV2 1xPhospho [T871]	Actin cytoskeleton-regulatory complex protein SLA1	3.17217	0.33188	2.87587	0.0355816	19.4745	44.6546	236.37	349.703	331.502	145.575	396.192	204.54							VTPQRTGTLVPVQKT
C2_01640W	SLA1	Q5ALV2 [878-886]	Q5ALV2 1xPhospho [T878]	Actin cytoskeleton-regulatory complex protein SLA1	3.99333	-1.14033	5.04509	-0.0885653	123.973	55.7926	1531.61	1346.29	3194.69	2772.44	1554.63	1151.86							TLVPVQKTGGLVPVQ
C2_01640W	SLA1	Q5ALV2 [192-204]	Q5ALV2 2xPhospho [S194; T201]	Actin cytoskeleton-regulatory complex protein SLA1	3.34579	-0.386618	4.53783	0.805428	50.7022	52.3781	337.388	719.769	1561.67	854.973	1029.61	818.691					Y		PPAHRDRSPEHPPPT	SPEHPPPTPEKDYPR
C2_01680C	C2_01680C	A0A1D8PGH2 [215-237]	A0A1D8PGH2 1xPhospho [S/T]	FYVE-type domain-containing protein	0.665129	0.0269291	2.43086	1.79266	1746.51	851.011	1949.64	2169.86	11429.8	2580.88	7984.84	6289.8
C2_01680C	C2_01680C	A0A1D8PGH2 [444-464]	A0A1D8PGH2 1xPhospho [S]	FYVE-type domain-containing protein	0	-10.663	10.663	0	0	0	0	0	1620.37	0	0	0
C2_01680C	C2_01680C	A0A1D8PGH2 [242-264]	A0A1D8PGH2 1xPhospho [S245]	FYVE-type domain-containing protein	-1.41509	0.281704	0.962507	2.6593	4183.09	2366.96	1002.58	1452.98	9714.62	3050.39	6572.67	8945.07							ALKKLSLSPRPVTNP
C2_01680C	C2_01680C	A0A1D8PGH2 [295-305]	A0A1D8PGH2 1xPhospho [S297]	FYVE-type domain-containing protein	0.368637	-1.22062	2.92144	1.33218	818.108	227.537	758.156	592.202	6710.54	1217.85	1789.84	1611.64				Y			KQHHKLSSPSNDAAQ
C2_01680C	C2_01680C	A0A1D8PGH2 [345-353]	A0A1D8PGH2 1xPhospho [S348]	FYVE-type domain-containing protein	1.76278	-0.274955	2.94582	0.908083	1050.72	321.538	2617.88	2041.3	4287.5	6292.65	3619.33	5124.73							QPEKFNTSPNAGRTK
C2_01680C	C2_01680C	A0A1D8PGH2 [419-424]	A0A1D8PGH2 1xPhospho [S421]	FYVE-type domain-containing protein	1.52448	-0.81249	3.69403	1.35706	638.029	471.342	1454.01	1739.34	11721.2	2648.67	3771.75	4409.97	Y						FNAKRKPSIPKMHFQ
C2_01680C	C2_01680C	A0A1D8PGH2 [546-557]	A0A1D8PGH2 1xPhospho [S551]	FYVE-type domain-containing protein	0.536495	-10.2215	3.05332	-7.70465	142.823	0	84.0797	123.527	747.361	445.542	0	0							KKDVVANSSNASVRS
C2_01680C	C2_01680C	A0A1D8PGH2 [73-102]	A0A1D8PGH2 1xPhospho [S99]	FYVE-type domain-containing protein	0.325302	0.347156	2.79295	2.81481	893.974	644.757	837.385	1090.78	8826.78	1843.26	5405.63	8167.47		Y					NDTKDENSPTKSDLS
C2_01680C	C2_01680C	A0A1D8PGH2 [89-102]	A0A1D8PGH2 1xPhospho [S99]	FYVE-type domain-containing protein	0.454468	-1.87962	2.61808	0.283989	1034.33	145.77	862.654	754.775	4749.31	2500.82	1207.44	762.085		Y					NDTKDENSPTKSDLS
C2_01680C	C2_01680C	A0A1D8PGH2 [159-170]	A0A1D8PGH2 1xPhospho [T/S]	FYVE-type domain-containing protein	0.194501	1.33004	1.36185	2.49739	1689.97	1100.32	1020.75	2172.41	4298.85	2874.17	6781.12	11254.1
C2_01680C	C2_01680C	A0A1D8PGH2 [215-237]	A0A1D8PGH2 2xPhospho [S/T]	FYVE-type domain-containing protein	-0.977965	-0.823234	2.84779	3.00253	270.512	0	0	136.845	1953.61	0	318.343	785.352
C2_01680C	C2_01680C	A0A1D8PGH2 [444-464]	A0A1D8PGH2 2xPhospho [S/T]	FYVE-type domain-containing protein	0.403516	-0.43414	3.20239	2.36473	1004.71	507.356	922.398	1077.98	10849.6	3076.91	5951.39	4355.83
C2_01700C	HAP42	A0A1D8PGE6 [68-84]	A0A1D8PGE6 1xPhospho [S69]	Hap42p	1.21511	0.540329	0.849091	0.174306	3.77843e+06	4.35163e+06	9.07046e+06	9.80424e+06	7.14718e+06	7.49804e+06	1.26366e+07	8.66201e+06							TGVAPKSSPLITPLT
C2_01700C	HAP42	A0A1D8PGE6 [85-94]	A0A1D8PGE6 1xPhospho [S89]	Hap42p	1.68505	0.612608	2.20842	1.13597	899791	0	1.73471e+06	1.15859e+06	2.02293e+06	2.13562e+06	2.91387e+06	3.44464e+06			Y				LTKTTSISPQLSKAK
C2_01710W	HSK3	Q5ALU4 [23-49]	Q5ALU4 1xPhospho [T/S]	Hsk3p	-0.205253	0.00178198	1.02115	1.22818	7.16606e+06	6.74557e+06	6.66669e+06	5.40007e+06	1.43842e+07	1.38499e+07	1.47985e+07	1.34705e+07
C2_01710W	HSK3	Q5ALU4 [23-50]	Q5ALU4 1xPhospho [T/S]	Hsk3p	1.87124	-0.86172	0.123049	-2.60991	5.01427e+06	5.13494e+06	1.75823e+07	1.95484e+07	7.9871e+06	3.06573e+06	3.06297e+06	3.01936e+06
C2_01730W	SPC24	Q5ALU2 [169-180]	Q5ALU2 1xPhospho [S169]	Probable kinetochore protein SPC24	-11.6499	1.15855	-1.26958	11.5389	1697.16	1515.3	0	0	0	1331.88	1515.46	1458.96							LLNDMDKSGIMEQDP
C2_01820C	SNU71	Q5AM84 [345-354]	Q5AM84 1xPhospho [S352]	U1 small nuclear ribonucleoprotein component SNU71	0	-8.23454	21.1034	12.8688	0	0	0	0	6860.06	2.24605e+06	4329.16	3149.81							AAVGVTISPKVSHRD
C2_01840C	RAD7	A0A1D8PGH5 [78-91]	A0A1D8PGH5 1xPhospho [S]	UV-damaged DNA-binding protein	-0.933026	2.06533	-5.83119	-2.83283	2956257	0	1.54836e+06	0	6497.18	45427.2	77124.7	140198
C2_01840C	RAD7	A0A1D8PGH5 [81-91]	A0A1D8PGH5 1xPhospho [S]	UV-damaged DNA-binding protein	-0.172101	-0.520181	-5.83595	-6.18403	3.95734e+06	4.13785e+06	7.04785e+06	137027	95106.1	46612.7	51049.8	47768.2
C2_01840C	RAD7	A0A1D8PGH5 [81-91]	A0A1D8PGH5 2xPhospho [S82; T/S]	UV-damaged DNA-binding protein	1.85193	-17.0292	-2.74672	-21.6279	489793	407941	3.19232e+06	48352.1	91257.7	42493.7	0	0			Y				RRRSTRRSPSAPVED
C2_01840C	RAD7	A0A1D8PGH5 [78-91]	A0A1D8PGH5 2xPhospho [T/S]	UV-damaged DNA-binding protein	-21.5217	-1.59958	-3.87918	16.0429	1.52114e+06	1.4896e+06	0	0	151723	52884.2	34282.1	33232.3
C2_01840C	RAD7	A0A1D8PGH5 [277-292]	A0A1D8PGH5 3xPhospho [T282; S284; S288]	UV-damaged DNA-binding protein	-7.82208	0	-21.4927	-13.6707	0	2.95094e+06	0	13039.1	0	0	0	0							NRSLNNKTISLFLSP	SLNNKTISLFLSPDL	KTISLFLSPDLKSLQ
C2_01850W	RAD23	A0A1D8PGE3 [76-85]	A0A1D8PGE3 1xPhospho [T]	Rad23p	-0.39474	-0.498528	2.43476	2.33097	3220.46	4620.47	2169.14	3794.64	30926.3	11472.1	14123.1	15887.4
C2_01850W	RAD23	A0A1D8PGE3 [77-85]	A0A1D8PGE3 1xPhospho [T]	Rad23p	-0.157461	-1.66525	2.20664	0.698849	2341.66	3802.78	1966.3	3542.7	18828.1	9538.14	4626.23	4316.67
C2_01850W	RAD23	A0A1D8PGE3 [74-85]	A0A1D8PGE3 1xPhospho [T77]	Rad23p	0	-8.05386	8.05386	0	0	0	0	0	264.737	0	0	0			Y				MINKTKKTPTPVPET
C2_01850W	RAD23	A0A1D8PGE3 [74-85]	A0A1D8PGE3 2xPhospho [T77; T79]	Rad23p	0	-1.95766	10.4857	8.52802	0	0	0	0	1116.91	315.941	191.634	176.505			Y				MINKTKKTPTPVPET	NKTKKTPTPVPETKS
C2_01880C	ZCF6	A0A1D8PGF3 [292-305]	A0A1D8PGF3 1xPhospho [T294]	Zcf6p (Fragment)	-1.33515	-23.2006	1.32704	-20.5384	0	3.84225e+06	325016	1.19786e+06	4.61478e+06	5.02493e+06	0	0							ISFERNTTPDGINGD
C2_01890W	CTF1	A0A1D8PGH7 [980-1003]	A0A1D8PGH7 1xPhospho [S/T]	Ctf1p	5.14918	1.1746	-0.752198	-4.72678	164083	52472.8	7.52705e+06	157696	107946	20622.6	181013	109206
C2_01890W	CTF1	A0A1D8PGH7 [979-1003]	A0A1D8PGH7 1xPhospho [S997]	Ctf1p	6.9172	2.72184	-1.76614	-5.9615	35220.4	0	4.2569e+06	0	4403.55	5950.32	52020.7	16291			Y				DKPTTDTSPTSSIKS
C2_01890W	CTF1	A0A1D8PGH7 [784-797]	A0A1D8PGH7 1xPhospho [T/S]	Ctf1p	4.83143	0.166665	2.04508	-2.61969	23723.7	4071.69	791392	0	82114.9	32598.3	86578.2	42183
C2_01930C	C2_01930C	A0A1D8PGG2 [58-69]	A0A1D8PGG2 1xPhospho [S]	Uncharacterized protein	1.21907	-1.96677	0.0462136	-3.13962	1.08604e+06	1.08883e+06	1.59922e+06	3.46379e+06	723063	1.5226e+06	574499	0
C2_01930C	C2_01930C	A0A1D8PGG2 [58-69]	A0A1D8PGG2 2xPhospho [S62; S/T]	Uncharacterized protein	0.05817	-0.619622	-0.288873	-0.966665	483755	750830	337248	948133	579766	430792	0	657713			Y				GSKLSHSSSINNSTR
C2_01950C	AMN1	Q5ALR8 [32-38]	Q5ALR8 1xPhospho [S33]	Antagonist of mitotic exit network protein 1	-0.217808	-5.11494	2.26893	-2.6282	9318498	0	0	8.0127e+06	2.42039e+07	2.07081e+07	0	1.29602e+06							TNEEGRVSPTIDKQQ
C2_01970C	ROD1	A0A1D8PGG1 [785-796]	A0A1D8PGG1 1xPhospho [S]	Rod1p	4.46547	0.504884	-1.65901	-5.6196	12862.5	123290	97852.3	2.91008e+06	19890.7	23222.1	32695.2	28482.6
C2_01980C	SRD1	A0A1D8PGG7 [190-199]	A0A1D8PGG7 1xPhospho [S190]	Srd1p	-0.599018	-0.207789	0.776422	1.16765	431.533	350.426	190.37	325.542	671.941	668.17	582.588	577.632							DDDNDAKSNFDNEDF
C2_01980C	SRD1	A0A1D8PGG7 [220-231]	A0A1D8PGG7 1xPhospho [S223]	Srd1p	0.414922	-0.11572	2.56762	2.03698	140.715	71.5722	129.133	154.228	628.74	634.692	504.697	661.275			Y				STFKTSNSLDNDYEY
C2_01980C	SRD1	A0A1D8PGG7 [303-326]	A0A1D8PGG7 1xPhospho [Y/S]	Srd1p	-0.0417435	1.0594	1.93325	3.03439	143.532	75.4182	116.604	96.0737	596.677	242.343	855.543	894.108
C2_01990C	FAB1	A0A1D8PGH4 [93-104]	A0A1D8PGH4 1xPhospho [S/T]	1-phosphatidylinositol-3-phosphate 5-kinase	4.21662	0.696137	1.22655	-2.29393	1530.96	1360.88	15157.6	38625.5	2821.96	3946.48	5777.51	5189.08
C2_01990C	FAB1	A0A1D8PGH4 [291-298]	A0A1D8PGH4 1xPhospho [S]	1-phosphatidylinositol-3-phosphate 5-kinase	0.120035	0.741807	-1.27009	-0.648322	2573.42	13159.3	3105.68	13992.1	3951.34	2571.37	6220.36	4688.05
C2_01990C	FAB1	A0A1D8PGH4 [626-644]	A0A1D8PGH4 1xPhospho [S]	1-phosphatidylinositol-3-phosphate 5-kinase	1.32901	11.0971	-8.00847	1.75964	256.506	0	645.932	0	0	0	1219.16	970.44
C2_01990C	FAB1	A0A1D8PGH4 [25-40]	A0A1D8PGH4 1xPhospho [S]	1-phosphatidylinositol-3-phosphate 5-kinase	3.32234	-0.303462	1.29384	-2.33196	8671.38	4173.01	43289.2	85200.4	16355.9	15137.4	15518.2	10000.8
C2_01990C	FAB1	A0A1D8PGH4 [156-163]	A0A1D8PGH4 1xPhospho [S158]	1-phosphatidylinositol-3-phosphate 5-kinase	0.749088	0.758691	0.0454853	0.0550885	11136.9	16804.4	18350	28612.3	13285	15551.2	31769.9	17020.4						Y	KRITRSSSPLDLKGD
C2_01990C	FAB1	A0A1D8PGH4 [2260-2272]	A0A1D8PGH4 1xPhospho [S2264]	1-phosphatidylinositol-3-phosphate 5-kinase	0.742855	-2.13368	2.05251	-0.824027	190.398	169.016	271.387	330.76	453.228	1040.87	229.16	110.536							DTKLEESSINNSSNA
C2_01990C	FAB1	A0A1D8PGH4 [2-16]	A0A1D8PGH4 1xPhospho [S4]	1-phosphatidylinositol-3-phosphate 5-kinase	0.470211	10.805	-9.84194	0.492834	916.742	0	326.562	943.797	0	0	1044.5	743.563							XXXXMIGSPPDTPND
C2_01990C	FAB1	A0A1D8PGH4 [2-16]	A0A1D8PGH4 1xPhospho [S4]	1-phosphatidylinositol-3-phosphate 5-kinase	1.72156	-0.432058	1.49112	-0.662492	6523.94	10862.9	20903.2	36439.6	17018	31859.7	20582.6	15645.5							XXXXMIGSPPDTPND
C2_01990C	FAB1	A0A1D8PGH4 [1-16]	A0A1D8PGH4 1xPhospho [S4]	1-phosphatidylinositol-3-phosphate 5-kinase	2.04137	8.01617	-9.26049	-3.28569	302.394	309.926	829.59	1694.06	0	0	0	257.886							XXXXMIGSPPDTPND
C2_01990C	FAB1	A0A1D8PGH4 [1-16]	A0A1D8PGH4 1xPhospho [S4]	1-phosphatidylinositol-3-phosphate 5-kinase	2.43999	0.810292	0.922846	-0.706854	1069.84	782.534	4460.97	5595.16	1095.82	2416.9	3326.92	2833.63							XXXXMIGSPPDTPND
C2_01990C	FAB1	A0A1D8PGH4 [575-585]	A0A1D8PGH4 1xPhospho [S577]	1-phosphatidylinositol-3-phosphate 5-kinase	0.338338	-1.05124	1.43221	0.0426334	2652.14	2075.74	2361.01	3616.71	5299	7461.38	3417.65	2739.39							SDGEKVISAEEIEVP
C2_01990C	FAB1	A0A1D8PGH4 [812-818]	A0A1D8PGH4 1xPhospho [S814]	1-phosphatidylinositol-3-phosphate 5-kinase	0.306346	-1.73907	0.46261	-1.58281	725.223	1420.48	741.636	1911.91	1288.38	1668.84	445.906	439.268							SFMTRTPSFNMRVLS
C2_01990C	FAB1	A0A1D8PGH4 [833-845]	A0A1D8PGH4 1xPhospho [S835]	1-phosphatidylinositol-3-phosphate 5-kinase	-9.73818	-3.67807	1.00417	7.06427	462.632	390.417	0	0	550.348	1161.69	0	132.831							SRFRRELSLEPGDIQ
C2_01990C	FAB1	A0A1D8PGH4 [93-109]	A0A1D8PGH4 1xPhospho [S99]	1-phosphatidylinositol-3-phosphate 5-kinase	1.36531	0.788388	0.894139	0.317215	1845.65	1637.66	5230.66	3745.05	2623.7	3850.89	5124.1	6059.18							KPNVLDTSPFTNRVS
C2_01990C	FAB1	A0A1D8PGH4 [851-880]	A0A1D8PGH4 1xPhospho [T/S]	1-phosphatidylinositol-3-phosphate 5-kinase	0.593872	-10.6683	1.88417	-9.37804	439.856	0	0	664.381	528.422	1097.95	0	0
C2_01990C	FAB1	A0A1D8PGH4 [25-40]	A0A1D8PGH4 2xPhospho [S/T]	1-phosphatidylinositol-3-phosphate 5-kinase	2.26	-2.07712	1.99857	-2.33856	521.647	174.274	1079.42	2257.79	1282.61	1501.31	324.396	334.593
C2_02000W	C2_02000W	A0A1D8PGG5 [19-29]	A0A1D8PGG5 1xPhospho [S]	Uncharacterized protein	-3.78305	-1.27401	-5.22103	-2.71199	33890.7	953975	19603	52156.9	24022.5	2462.22	8777.92	2173.2
C2_02000W	C2_02000W	A0A1D8PGG5 [30-40]	A0A1D8PGG5 1xPhospho [S33]	Uncharacterized protein	-6.88631	-1.11173	-7.7409	-1.96632	87271.6	1.31905e+07	29838.1	82398.6	53017.9	9051.27	20161.2	8560		Y	Y		Y		DESRSPASPNKPDHK
C2_02010C	CHT4	Q5AM60 [284-296]	Q5AM60 1xPhospho [S284]	Chitinase 4 (EC 3.2.1.14)	0.605908	1.38412	-0.850304	-0.072093	1.59088e+06	2.06576e+06	2.56716e+06	2.99802e+06	1.0008e+06	1.02742e+06	2.61839e+06	2.67552e+06							PFTKERKSGCIEADV
C2_02020W	C2_02020W	A0A1D8PGI9 [85-96]	A0A1D8PGI9 1xPhospho [S94]	Ubiquitin carboxyl-terminal hydrolase (EC 3.4.19.12)	1.7966	0.537766	1.7933	0.534475	9.54162	0	18.9532	16.6684	23.2399	12.2982	24.9215	27.1217							YDDNGEKSPKIQKLE
C2_02030W	ARO3	A0A1D8PGI8 [310-324]	A0A1D8PGI8 1xPhospho [S318]	Phospho-2-dehydro-3-deoxyheptonate aldolase (EC 2.5.1.54)	2.24935	-0.905641	4.14665	0.991652	62.5143	0	123.664	177.327	769.137	354.822	210.469	389.03							ICGLMIESNINDGRQ
C2_02040W	C2_02040W	A0A1D8PGI3 [501-510]	A0A1D8PGI3 1xPhospho [S/T]	Uncharacterized protein	2.36471	-8.21789	3.04069	-7.54192	2.80992e+06	87189.1	8.50145e+06	6.42013e+06	1.73108e+07	6.52907e+06	55954.3	24114.9
C2_02040W	C2_02040W	A0A1D8PGI3 [58-67]	A0A1D8PGI3 1xPhospho [S/T]	Uncharacterized protein	2.83275	-5.80133	1.99592	-6.63816	2.5967e+06	39678.1	9.6754e+06	9.10697e+06	3.15661e+06	7.35913e+06	117645	70921
C2_02040W	C2_02040W	A0A1D8PGI3 [439-458]	A0A1D8PGI3 1xPhospho [S]	Uncharacterized protein	2.36389	-5.69949	1.0981	-6.96527	22699507	673514	4.54496e+07	7.48645e+07	3.362e+07	1.64153e+07	571151	391702
C2_02040W	C2_02040W	A0A1D8PGI3 [1007-1018]	A0A1D8PGI3 1xPhospho [S1009]	Uncharacterized protein	21.4797	-20.5185	20.5185	-21.4797	0	0	949414	1.97493e+06	873490	628570	0	0							VTFYKSSSPSSSIFD
C2_02040W	C2_02040W	A0A1D8PGI3 [109-130]	A0A1D8PGI3 1xPhospho [S128]	Uncharacterized protein	2.99677	-4.84354	1.40822	-6.43209	1.09798e+06	17486.6	4.36257e+06	4.5412e+06	1.21431e+06	1.74624e+06	79406.3	23707.9							SNCINGISPKESKVK
C2_02040W	C2_02040W	A0A1D8PGI3 [421-438]	A0A1D8PGI3 1xPhospho [S424]	Uncharacterized protein	1.25435	-7.07183	0.714859	-7.61132	3.31826e+06	83047.8	3.85942e+06	4.25475e+06	3.09507e+06	2.48758e+06	36538.9	4956.12							NYNKYFGSDLEDTND
C2_02040W	C2_02040W	A0A1D8PGI3 [459-469]	A0A1D8PGI3 1xPhospho [T]	Uncharacterized protein	0.982677	-9.74803	1.60305	-9.12766	29601472	386246	2.58964e+07	3.33632e+07	7.19614e+07	1.91368e+07	105939	0
C2_02040W	C2_02040W	A0A1D8PGI3 [449-458]	A0A1D8PGI3 1xPhospho [T452]	Uncharacterized protein	1.24067	-7.82995	1.61036	-7.46026	3751211	0	4.30925e+06	4.55518e+06	6.40717e+06	5.0463e+06	33154.3	17181.7							SPERNVITPDLENKT
C2_02040W	C2_02040W	A0A1D8PGI3 [93-98]	A0A1D8PGI3 1xPhospho [T95]	Uncharacterized protein	1.25048	-6.1219	0.494224	-6.87815	1.25759e+06	21324.8	1.1435e+06	1.89928e+06	1.05233e+06	749102	18903.4	6962.35		Y					SSPKKLLTPIKNLFA
C2_02040W	C2_02040W	A0A1D8PGI3 [501-510]	A0A1D8PGI3 2xPhospho [S503; S/T]	Uncharacterized protein	3.48338	-17.9857	2.76562	-18.7035	38167.6	0	275045	151837	259561	0	0	0							IVGPKTQSPKPSPTK
C2_02040W	C2_02040W	A0A1D8PGI3 [58-67]	A0A1D8PGI3 2xPhospho [T/S]	Uncharacterized protein	1.30386	-7.01622	1.86078	-6.45931	3.28115e+06	26246.3	4.38263e+06	3.78297e+06	3.96606e+06	8.04652e+06	65918.2	26879.7
C2_02050C	C2_02050C	A0A1D8PGI2 [889-905]	A0A1D8PGI2 1xPhospho [S]	Uncharacterized protein	-1.83023	0.638732	-1.58925	0.879709	4.85024e+06	1.86982e+07	3.32508e+06	3.29722e+06	4.68035e+06	3.14583e+06	8.8143e+06	3.37076e+06
C2_02050C	C2_02050C	A0A1D8PGI2 [127-142]	A0A1D8PGI2 1xPhospho [S137]	Uncharacterized protein	-0.0559281	0.0165361	-0.740502	-0.668038	7019482	1.00173e+07	6.06797e+06	1.0321e+07	6.93946e+06	3.2576e+06	5.02584e+06	5.28877e+06							AASSVVSSPHGSRAG
C2_02050C	C2_02050C	A0A1D8PGI2 [455-466]	A0A1D8PGI2 1xPhospho [S463]	Uncharacterized protein	-19.3684	-3.3963	2.7075	18.6796	405021	271782	0	0	2.32568e+06	2.09513e+06	251567	168300							NNVKPNDSTEKLENP
C2_02050C	C2_02050C	A0A1D8PGI2 [127-142]	A0A1D8PGI2 2xPhospho [S137; T/S]	Uncharacterized protein	-0.660921	-21.4453	-1.77545	-22.5599	3.905e+06	5.87072e+06	2.32861e+06	3.85428e+06	1.0285e+06	1.82702e+06	0	0							AASSVVSSPHGSRAG
C2_02100W	SNF2	A0A1D8PGK4 [1662-1690]	A0A1D8PGK4 1xPhospho [S]	SWI/SNF catalytic subunit	3.15252	0.33824	6.62085	3.80657	0	0	7.89205	0	24.0674	73.3503	67.5357	55.8852
C2_02100W	SNF2	A0A1D8PGK4 [210-230]	A0A1D8PGK4 1xPhospho [S216]	SWI/SNF catalytic subunit	-0.542787	4.96871	-2.92793	2.58357	177.05	2.7538	117.416	5.69564	22.7583	0	396.304	346.647					Y		RQQNQPPSPQSAFTN
C2_02100W	SNF2	A0A1D8PGK4 [314-324]	A0A1D8PGK4 1xPhospho [T/S]	SWI/SNF catalytic subunit	-0.141036	-4.28727	2.11162	-2.03461	403.168	347.428	370.01	310.589	1140.55	2106.68	41.9963	123.364
C2_02100W	SNF2	A0A1D8PGK4 [1283-1303]	A0A1D8PGK4 1xPhospho [T1285]	SWI/SNF catalytic subunit	0.471709	-2.13086	2.86051	0.257943	13.254	5.98048	13.7143	13.3458	35.0688	110.888	18.0264	14.5271							ERRQKGGTDEEEEDL
C2_02100W	SNF2	A0A1D8PGK4 [314-324]	A0A1D8PGK4 2xPhospho [T318; S/T]	SWI/SNF catalytic subunit	-0.426034	-1.31876	2.1323	1.23958	256.337	114.182	135.961	139.563	521.77	1106.03	336.461	315.492			Y				NPKSTGGTPEIPEKK
C2_02170W	C2_02170W	A0A1D8PGJ8 [68-80]	A0A1D8PGJ8 1xPhospho [S72]	Uncharacterized protein	-11.9326	0	-11.9326	0	3908.08	0	0	0	0	0	0	0							AAKTQSSSSTVTPPP
C2_02180W	C2_02180W	A0A1D8PGH6 [208-223]	A0A1D8PGH6 1xPhospho [S/T]	Zn(2+) transporter	-1.04711	-2.82047	-1.43882	-3.21217	1.3487e+07	1.39438e+07	4.28045e+06	8.99432e+06	5.96351e+06	4.15491e+06	0	1.43241e+06
C2_02190C	EDC1	Q5ALP1 [1-35]	Q5ALP1 1xAcetyl [N-Term]; 1xPhospho [T]	Enhancer of mRNA-decapping protein 1	0.668767	-1.38422	-6.56527	-8.61826	2459.5	1.60096e+06	2.51608e+06	32888.5	4628.44	12302.3	3146.24	3339.26
C2_02190C	EDC1	Q5ALP1 [1-34]	Q5ALP1 1xAcetyl [N-Term]; 1xPhospho [T]	Enhancer of mRNA-decapping protein 1	1.93685	-1.40427	1.49868	-1.84244	2612.5	0	0	10005.3	3249.19	4135.14	1268.91	1520.34
C2_02190C	EDC1	Q5ALP1 [74-85]	Q5ALP1 1xPhospho [S80]	Enhancer of mRNA-decapping protein 1	-3.50867	1.66906	-12.2688	-7.09105	0	6.32424e+06	546972	8667.71	1280.55	0	2422.18	1652.27							KSKPASSSTTNFKLT
C2_02190C	EDC1	Q5ALP1 [86-97]	Q5ALP1 1xPhospho [S89]	Enhancer of mRNA-decapping protein 1	-0.998226	-1.29293	-7.87073	-8.16544	21304.9	1.4263e+07	7.07561e+06	75323.5	18749.9	42277.7	13061.9	11844.1							TNFKLTASPSLPSGA
C2_02200W	ZRC1	A0A1D8PGL8 [410-440]	A0A1D8PGL8 1xPhospho [S]	Zn(2+) transporter	-1.46923	0.738317	-1.46288	0.744672	2752.44	9727.95	1658.15	2848.81	3181.17	1345.69	1834.79	5717.72
C2_02200W	ZRC1	A0A1D8PGL8 [410-440]	A0A1D8PGL8 2xPhospho [S416; S417]	Zn(2+) transporter	-1.83514	0.123093	1.45961	3.41784	3919.74	0	0	1097.84	9168.9	1613.44	4127.51	7615.27							KNGSNGDSSIDEEQD	NGSNGDSSIDEEQDQ
C2_02230C	C2_02230C	A0A1D8PGM5 [165-180]	A0A1D8PGM5 1xPhospho [S]	GLOBIN domain-containing protein	-1.62429	-2.62622	2.59478	1.59284	2.71341e+06	3.65086e+06	2.06438e+06	0	2.13516e+07	1.70947e+07	6.22705e+06	0
C2_02230C	C2_02230C	A0A1D8PGM5 [520-533]	A0A1D8PGM5 1xPhospho [S]	GLOBIN domain-containing protein	0.767005	-2.18677	2.6216	-0.332174	3.83441e+06	5.0822e+06	7.50306e+06	7.67063e+06	2.92876e+07	2.5588e+07	6.97291e+06	5.08014e+06
C2_02230C	C2_02230C	A0A1D8PGM5 [596-614]	A0A1D8PGM5 1xPhospho [S602]	GLOBIN domain-containing protein	0	-19.953	19.953	0	0	0	0	0	1.01494e+06	0	0	0			Y				RNLSTASSGNDFDFT
C2_02230C	C2_02230C	A0A1D8PGM5 [633-646]	A0A1D8PGM5 1xPhospho [S640]	GLOBIN domain-containing protein	-1.84818	0.694162	-0.241662	2.30068	3.58887e+06	2.80368e+07	2.84042e+06	5.9434e+06	1.58346e+07	1.09135e+07	2.08571e+07	2.24197e+07							GPSASTSSINSTSRA
C2_02230C	C2_02230C	A0A1D8PGM5 [520-533]	A0A1D8PGM5 2xPhospho [S/Y]	GLOBIN domain-containing protein	-0.681016	-22.1045	2.44933	-18.9742	825662	0	514986	0	2.96288e+06	1.54657e+06	0	0
C2_02230C	C2_02230C	A0A1D8PGM5 [165-180]	A0A1D8PGM5 2xPhospho [S175; T]	GLOBIN domain-containing protein	0	-22.4315	22.4315	0	0	0	0	0	2.89719e+06	2.75932e+06	0	0							IDTLPTPSPPLQKEE
C2_02230C	C2_02230C	A0A1D8PGM5 [703-719]	A0A1D8PGM5 2xPhospho [S705; T/S]	GLOBIN domain-containing protein	0	-21.7225	21.7225	0	0	0	0	0	2.1119e+06	1.34851e+06	0	0							IYMNKAASVSSFGCL
C2_02250C	OPI1	A0A1D8PGK8 [194-212]	A0A1D8PGK8 1xPhospho [S]	Transcriptional regulator	7.68828	0.515018	-1.06303	-8.23628	3669.64	4561.54	972123	725792	3939.14	0	3316.13	2313.38
C2_02250C	OPI1	A0A1D8PGK8 [259-274]	A0A1D8PGK8 1xPhospho [S259]	Transcriptional regulator	0	-10.2059	10.2059	0	0	0	0	0	552.018	628.09	0	0							EKLIAQKSHDSNSTN
C2_02250C	OPI1	A0A1D8PGK8 [159-179]	A0A1D8PGK8 1xPhospho [T169]	Transcriptional regulator	9.06565	0.538411	0.173615	-8.35362	13324.9	7557.86	5.38994e+06	5.80035e+06	13565.6	9987.85	24340.6	9868.26			Y				AVSSTDITPTNSNFG
C2_02250C	OPI1	A0A1D8PGK8 [396-408]	A0A1D8PGK8 2xPhospho [S400; S402]	Transcriptional regulator	0	-14.1111	14.1111	0	0	0	0	0	10300.7	7393.67	0	0							EQKLQSQSQSPEGLE	KLQSQSQSPEGLEKQ
C2_02260W	C2_02260W	Q5ALN3 [50-73]	Q5ALN3 1xPhospho [S/T]	Uncharacterized protein	-0.404327	-0.948459	0.82174	0.277608	309281	362477	261935	245637	785997	401360	326153	289118
C2_02260W	C2_02260W	Q5ALN3 [7-22]	Q5ALN3 1xPhospho [S/T]	Uncharacterized protein	0	-11.6766	11.6766	0	0	0	0	0	2982.03	290.368	0	0
C2_02260W	C2_02260W	Q5ALN3 [218-230]	Q5ALN3 1xPhospho [S]	Uncharacterized protein	-1.33433	-3.33429	2.49339	0.493427	10866.6	3690.2	2815.22	2957.02	60384.6	21588.8	3276.34	4850.14
C2_02260W	C2_02260W	Q5ALN3 [187-205]	Q5ALN3 1xPhospho [S]	Uncharacterized protein	-0.546064	-1.76582	1.38904	0.169289	89964.3	42335.1	51487.2	39122.4	149917	196583	56277.8	45613.3
C2_02260W	C2_02260W	Q5ALN3 [119-138]	Q5ALN3 1xPhospho [S131]	Uncharacterized protein	-0.448902	-1.81501	1.42552	0.0594099	1011.07	703.012	535.639	719.832	3156.79	1449.11	526.457	781.836							IPESSSSSLTSELEK
C2_02260W	C2_02260W	Q5ALN3 [51-73]	Q5ALN3 1xPhospho [T/S]	Uncharacterized protein	-1.29008	-1.79968	2.4191	1.9095	4373.26	3126.2	619.111	2447.05	30442.3	9671.92	5788.95	5732.72
C2_02260W	C2_02260W	Q5ALN3 [187-205]	Q5ALN3 2xPhospho [T/S]	Uncharacterized protein	-0.718711	-3.89565	2.16065	-1.01629	2748.49	1800.73	1770.14	993.754	14674.6	5669.2	468.132	897.795
C2_02260W	C2_02260W	Q5ALN3 [51-73]	Q5ALN3 2xPhospho [T63; S/T]	Uncharacterized protein	0.519148	-2.01825	5.09087	2.55347	547.027	206.725	531.191	549.449	16849.9	8871.31	3831.27	2517.46							IEDSAEGTPAPEDKP
C2_02260W	C2_02260W	Q5ALN3 [50-73]	Q5ALN3 2xPhospho [T63; T/S]	Uncharacterized protein	0	-12.5846	12.5846	0	0	0	0	0	4507.09	1634.4	0	0							IEDSAEGTPAPEDKP
C2_02260W	C2_02260W	Q5ALN3 [218-230]	Q5ALN3 2xPhospho [Y/S]	Uncharacterized protein	-0.629931	-14.2589	5.23128	-8.39764	262.706	258.171	0	336.241	14307.1	5295.76	0	0
C2_02260W	C2_02260W	Q5ALN3 [187-205]	Q5ALN3 3xPhospho [T189; S194; S199]	Uncharacterized protein	0	-10.6656	10.6656	0	0	0	0	0	1623.25	0	0	0			Y				NKNLKALTSSASSVP	ALTSSASSVPGGSPI	ASSVPGGSPIATYKE
C2_02320C	CPR3	Q5ALM6 [95-107]	Q5ALM6 1xPhospho [S/Y]	Peptidyl-prolyl cis-trans isomerase (PPIase) (EC 5.2.1.8)	5.72049	-0.577698	7.68229	1.38411	0	0	51.7276	0	204.4	0	136.625	0
C2_02350C	SAC3	A0A1D8PGL7 [675-687]	A0A1D8PGL7 1xPhospho [S]	Sac3p	-0.0451095	-16.8118	-4.54053	-21.3072	2509.45	2.67466e+06	17938.6	2.57682e+06	78672.7	36364.3	0	0
C2_02350C	SAC3	A0A1D8PGL7 [44-62]	A0A1D8PGL7 1xPhospho [S59]	Sac3p	0.751167	1.12378	-6.56617	-6.19356	67895.4	1.39524e+07	171009	2.34274e+07	100694	47264.9	151134	171295		Y					NNNINTGSPEKNANT
C2_02400W	ECM3	A0A1D8PGN3 [335-347]	A0A1D8PGN3 1xPhospho [S/T]	Putative ATPase	-1.64972	-2.05441	-0.0294196	-0.434113	5.05028e+06	3.85956e+06	1.2566e+06	1.58298e+06	7.23698e+06	1.493e+06	1.0486e+06	1.05311e+06
C2_02400W	ECM3	A0A1D8PGN3 [266-279]	A0A1D8PGN3 1xPhospho [S]	Putative ATPase	2.23041	-0.824189	3.42521	0.370611	358304	0	731213	950193	1.93708e+06	1.91188e+06	1.70739e+06	466506
C2_02400W	ECM3	A0A1D8PGN3 [203-215]	A0A1D8PGN3 1xPhospho [S]	Putative ATPase	3.0598	-3.21644	3.74772	-2.52852	3.84903e+06	1.15494e+06	2.16524e+07	2.00735e+07	3.76255e+07	2.95933e+07	1.64025e+06	5.59153e+06
[truncated: 5,015 more rows]

## Sheet: Consensus motif
Consensus motif for substrate prediction
[truncated: 7 more rows]

[truncated: 7 more sheets: PKA substrates, Cdc28 substrates, Yck2 substrates, Cbk1 substrates, MAPK substrates, Gin4 substrates, Upregulated phosphopeptides]
