# Supplementary material for: Integrative multi-omics profiling reveals cAMP-independent mechanisms regulating hyphal morphogenesis in Candida albicans
Source: PLoS Pathog. 2021 Aug 16;17(8):e1009861. doi: 10.1371/journal.ppat.1009861 (PMC8389844; doi:10.1371/journal.ppat.1009861)
Supplement: S4 Data — (XLSX) [file ppat.1009861.s015.xlsx]

## Sheet: Readme
These spreadsheets show abundance of the proteins identified from LC-MS/MS analysis and their protein/mRNA abundance ratio.
There are 4 samples, WT +/- GlcNAc and PR13 +/- GlcNAc
The columns in this table are:
Column name	Meaning
Gene_ID	Gene's ID
Gene	Gene name
UniProt Accession	UniProt accession number
MW [kDa]	Molecular weight
Protein	Protein description
A/B (log2Fold)	Log2 fold change in abundance (A versus B)
A/B (padj)	Adjusted p-value for the comparison
Abundance (LFQ)	The protein abundance is expressed in a label free quantitation (LFQ) unit.
Group	Functional group of the proteins
Protein/mRNA log10(ratio)	Log10 ratio of protein/mRNA abundance (estimates of protein translation rate)
5' UTR length log10(kb)	Length of the 5' UTR
Gene length log10(kb)	Length of the ORF
mRNA log10(FPKM)	mRNA abundance is expressed in a FPKM (fragments per kilobase of transcript per million mapped reads) unit.
Protein log10(LFQ)	The protein abundance is expressed in a label free quantitation (LFQ) unit.

## Sheet: Protein
Gene ID	Gene	UniProt Accession	MW [kDa]	Protein	WT_GalNAG/WT_Gal (log2Fold)	PR13_GalNAG/PR13_Gal (log2Fold)	PR13_Gal/WT_Gal (log2Fold)	PR13_GalNAG/WT_GalNAG (log2Fold)	WT_GalNAG/WT_Gal (padj)	PR13_GalNAG/PR13_Gal (padj)	PR13_Gal/WT_Gal (padj)	PR13_GalNAG/WT_GalNAG (padj)	WT_Gal_1_abundance (LFQ)	WT_Gal_2_abundance (LFQ)	WT_GalNAG_1_abundance (LFQ)	WT_GalNAG_2_abundance (LFQ)	PR13_Gal_1_abundance (LFQ)	PR13_Gal_2_abundance (LFQ)	PR13_GalNAG_1_abundance (LFQ)	PR13_GalNAG_2_abundance (LFQ)
C1_00060W	TUP1	P0CY34	57.6	Transcriptional repressor TUP1	0.298132	0.0278244	-0.388831	-0.659139	0.451379	0.994521	0.274695	0.0442718	30616	34211	42558	47314	17208	34012	29193	31304
C1_00070W	MVD	A0A1D8PC43	39.5	Diphosphomevalonate decarboxylase (EC 4.1.1.33)	0.509293	-0.449549	-0.512556	-1.4714	0.364902	0.607471	0.333995	0.00112125	22500	26800	31617	46906	11214	24684	17575	12650
C1_00110W	CCT8	Q5AB74	58.2	Chaperonin-containing T-complex subunit	-0.0508992	-0.121217	0.428873	0.358555	0.853869	0.747456	0.00696387	0.0311756	11855	10076	13137	10950	13700	16198	15861	16725
C1_00130C	VPS53	Q5AB78	80.7	Vps53p	-23.3204	-23.2728	-0.150337	0	9.90688e-07	4.65507e-06	0.989006	1	116	198	0	0	0	312	0	0
C1_00140W	KEL1	Q5AB80	113.9	Kel1p	-0.117027	0.171439	-0.112508	0.175958	0.192248	0.0833011	0.19442	0.0303449	12718	13241	14042	13081	10906	13423	15703	16720
C1_00150C	RIM8	Q9UW13	69.2	pH-response regulator protein palF/RIM8	0.386677	-1.08253	-0.116525	-1.58573	0.749588	0.394819	0.926468	0.0601131	186	299	313	398	238	207	175	76
C1_00160C	C1_00160C	Q5AB84	43.5	Uncharacterized protein	0.314586	-0.698336	0.262989	-0.749932	0.736586	0.523491	0.760771	0.299875	11034	9658	12964	16020	5314	21093	9535	8813
C1_00170W	LEU4	Q5AB86	64.2	2-isopropylmalate synthase	0.0201419	0.0642001	0.348137	0.392195	0.972047	0.940536	0.0826294	0.0493574	5470	5789	6617	6311	7347	7004	8705	9259
C1_00180W	RPL16A	Q5AB87	22.6	Ribosomal 60S subunit protein L16A	1.97492	-0.022193	4.17026	2.17315	0.046028	1	1.95636e-06	0.0248284	251	263	1804	545	6435	2486	2723	8284
C1_00210C	C1_00210C	A0A1D8PC56	44.4	Uncharacterized protein	-0.330334	-0.330257	1.08019	1.08027	0.29357	0.452912	1.42087e-05	2.01165e-05	3992	3322	3774	2861	6180	9685	7096	7675
C1_00220W	PHR2	O13318	58.7	pH-responsive protein 2 (pH-regulated protein 2)	0.144845	0.205929	-0.0129524	0.0481309	0.761576	0.789	0.982116	0.930475	26777	29008	34137	35534	31615	23062	36152	40316
C1_00310W	PNS1	Q5AB93	58	Protein PNS1	0.0047153	-0.96153	3.61378	2.64753	1	0.888328	0.10022	0.265922	55	58	135	0	646	752	307	548
C1_00320W	C1_00320W	Q5AB94	29.1	Vacuolar protein sorting-associated protein 29	-0.674378	0.0565851	-0.663605	0.0673575	0.0215477	0.973331	0.0220903	0.885794	5048	3662	3079	3107	2480	3109	3120	3759
C1_00330C	C1_00330C	A0A1D8PC71	20.9	CCR4-NOT core subunit	0.155103	0.34614	0.338148	0.529185	0.717429	0.485791	0.30901	0.0884409	5336	4253	6230	5885	6567	5523	9122	9380
C1_00340W	HBR1	Q8TG40	28.7	Adenylate kinase isoenzyme 6 homolog HBR1 (AK6) (EC 2.7.4.3) (Dual activity adenylate kinase/ATPase) (AK/ATPase) (Hemoglobin and proliferation-regulated protein 1) (Hb-regulated protein 1)	-0.903674	0.0289291	-0.560895	0.371708	0.0755264	1	0.300035	0.541383	19298	18618	12198	10807	16759	8261	14970	16496
C1_00350C	HMX1	Q5AB97	34	Hmx1p	-0.0172637	-0.553549	-0.612346	-1.14863	0.998819	0.370004	0.150044	0.00329055	821	875	892	998	417	724	478	427
C1_00360W	CDC13	Q5AB98	51.3	Cdc13p	-13.2971	0.179002	-4.27594	9.20015	2.1726e-14	0.974474	1.55595e-06	4.94906e-07	2233	1020	0	0	41	137	114	115
C1_00380C	NAA25	Q5AB99	87	Uncharacterized protein	-0.214267	-0.185871	-0.369071	-0.340675	0.579783	0.802723	0.261201	0.318534	1654	1474	1581	1477	1280	1141	1252	1303
C1_00400W	SVF1	Q5ABA2	43	Survival factor 1	-1.01339	-0.0292683	-0.888938	0.0951804	3.16728e-27	0.957054	5.08016e-21	0.474168	19990	19094	11450	10509	9526	11884	11812	13006
C1_00410C	C1_00410C	A0A1D8PC76	60.6	Aldehyde dehydrogenase	-0.391183	-0.159087	0.877235	1.10933	0.229222	0.835256	0.00134976	3.9832e-05	3208	2458	2928	2014	4752	5811	5515	5680
C1_00420W	C1_00420W	Q5ABA5	37.3	Uncharacterized protein	-0.1767	0.266038	0.307422	0.75016	0.6668	0.639566	0.358768	0.0102715	2864	2524	2913	2505	3399	3290	4047	5596
C1_00430W	ATG18	Q5ABA6	61.7	Autophagy-related protein 18	1.72063	-0.888665	1.46225	-1.14705	0.106914	0.648677	0.169946	0.316183	149	333	931	861	460	908	162	702
C1_00440W	UBP6	A0A1D8PC77	54.1	Ubiquitin carboxyl-terminal hydrolase (EC 3.4.19.12)	-0.19227	-0.380999	-0.261236	-0.449966	0.826955	0.761438	0.711973	0.495997	10190	10749	10887	9890	11058	6006	5653	10499
C1_00450C	C1_00450C	A0A1D8PC73	16.6	Uncharacterized protein	0.300826	-0.206813	1.13978	0.632141	0.612284	0.878594	0.00775698	0.19289	616	498	939	631	904	1630	1179	1377
C1_00460W	C1_00460W	Q5ABA8	11.5	Uncharacterized protein	0	9.54597	0	9.71432	1	0.234392	1	0.10975	0	0	0	0	0	0	165	162
C1_00470C	C1_00470C	Q5ABA9	50.7	N-acetylphosphatidylethanolamine-hydrolyzing phospholipase D	0.244174	0.113684	0.438469	0.307979	0.85231	0.981527	0.664356	0.785477	80	78	130	84	82	138	98	181
C1_00480C	GCN20	Q5ABB0	84.9	Putative AAA family ATPase	-0.2976	-0.402994	0.446889	0.341494	0.441983	0.415551	0.183136	0.348144	1591	1885	1743	1467	2309	2456	2466	1815
C1_00490C	TTR1	Q5ABB1	13.1	Dithiol glutaredoxin	-0.454803	-0.14858	-1.09629	-0.790067	0.780143	0.981527	0.35593	0.549008	462	1433	768	785	663	176	449	504
C1_00500C	GLO1	Q5ABB2	39.5	Lactoylglutathione lyase (EC 4.4.1.5) (Glyoxalase I)	0.424182	0.919429	-1.05463	-0.559382	0.507222	0.171333	0.0361132	0.338533	9220	21217	23305	22695	8243	6202	16292	16768
C1_00510W	C1_00510W	Q5ABB3	34.1	3-methyl-2-oxobutanoate hydroxymethyltransferase (EC 2.1.2.11)	-0.426228	0.306401	0.641988	1.37462	0.806967	0.950066	0.641673	0.25864	612	360	430	393	384	1221	365	1915
C1_00520W	C1_00520W	Q5ABB4	25.5	Phosphoglycerate mutase	-0.330884	1.83033	-2.28121	-0.119997	0.973474	0.840082	0.586442	0.989592	447	0	180	225	0	103	170	228
C1_00530C	C1_00530C	Q5ABB5	91	Uncharacterized protein	-11.9552	-9.80903	-2.22798	0	1.23735e-10	1.0413e-06	0.0646857	1	856	428	0	0	115	166	0	0
C1_00560W	CNS1	Q5ABB8	45.1	HSP70/90 family co-chaperone	-0.825018	-0.841706	-0.820563	-0.837251	0.017514	0.037813	0.016774	0.0163167	5182	5410	3032	3697	2303	3859	1731	2288
C1_00590W	TUF1	Q5ABC3	46.7	Elongation factor Tu	0.0104514	-0.0468375	0.0346716	-0.0226173	0.972047	0.884948	0.804335	0.890108	151196	148210	180497	161697	144373	165480	167277	189005
C1_00640C	RPO41	A0A1D8PCA4	148.3	DNA-directed RNA polymerase (EC 2.7.7.6)	-0.385935	-0.0455013	-0.0453367	0.295097	0.369738	0.982804	0.935932	0.506689	10656	10334	11694	6734	10960	9310	10736	12929
C1_00650C	SNF7	Q5ABD0	25.9	Vacuolar-sorting protein SNF7 (Vacuolar protein-sorting-associated protein 32)	0.107358	-0.402994	0.331261	-0.179091	0.814345	0.335152	0.288441	0.624302	2159	2035	2740	2391	2825	2439	2409	2376
C1_00660C	C1_00660C	Q5ABD1	38.2	t-SNARE syntaxin	1.77226	-0.380137	1.15463	-0.997765	3.74251e-14	0.339302	2.11679e-06	5.95985e-05	670	683	2390	2817	1335	1724	1390	1384
C1_00700W	C1_00700W	Q5ABD5	14.7	Uncharacterized protein	0.0427691	-0.178073	-0.10703	-0.327872	0.968588	0.878594	0.840005	0.477472	918	820	1098	937	596	1068	890	820
C1_00710C	TUB2	A0A1D8PC97	50	Tubulin beta chain	0.2134	-0.148877	-0.383633	-0.745909	0.761584	0.942919	0.485045	0.130881	16966	17690	22979	22492	7335	20546	14727	13975
C1_00730C	CMP1	A0A1D8PCA8	69.6	Serine/threonine-protein phosphatase (EC 3.1.3.16)	0.37689	1.36013	-0.531991	0.451247	0.34912	4.82708e-05	0.140295	0.230174	719	1035	1348	1229	512	722	1942	1780
C1_00750C	VPS27	Q5ABD9	94.9	Vacuolar protein sorting-associated protein 27	-0.941337	0.0278744	-2.07794	-1.10873	0.265881	1	0.00337478	0.167359	1794	1922	841	1323	249	673	351	730
C1_00770C	ROT1	Q5ABP8	29.9	Protein ROT1	-1.08596	-0.109918	-0.268965	0.707077	0.00777901	0.958451	0.603573	0.10766	21117	16713	11784	8571	11478	20963	12965	22104
C1_00790W	C1_00790W	A0A1D8PCC4	42.3	BBP1_C domain-containing protein	-0.0997916	-0.668036	0.606039	0.0377946	0.969572	0.748979	0.591946	0.9875	169	170	85	264	249	271	171	219
C1_00810W	ALG13	Q5ABE5	34.3	UDP-N-acetylglucosamine transferase subunit ALG13 (EC 2.4.1.141) (Asparagine-linked glycosylation protein 13)	1.18385	0.692744	0.867694	0.376588	0.720172	0.942941	0.783575	0.923721	92	0	125	115	69	105	179	150
C1_00820W	C1_00820W	Q5ABE6	40.6	PCI domain-containing protein	0	2.23275	7.02379	9.43632	1	0.911572	0.270994	0.12172	0	0	0	0	44	0	158	111
C1_00840C	NRM1	A0A1D8PCB2	63.7	Nrm1p	7.12055	7.93299	0	0.801072	0.282476	0.368009	1	0.934891	0	0	61	0	0	0	51	56
C1_00850W	IHD2	Q5ABE9	28.8	Ihd2p	-0.117826	-0.812861	-0.0603344	-0.75537	0.884578	0.165702	0.930677	0.104059	1378	1131	1589	1057	1049	1402	986	653
C1_00860W	ATG3	Q5ABQ7	38.6	Autophagy-related protein 3 (Autophagy-related E2-like conjugation enzyme ATG3)	0.392115	0.397085	-0.751457	-0.746486	0.536992	0.710187	0.155111	0.165428	2110	4460	5868	3939	1987	1905	3131	2999
C1_00870W	LRO1	A0A1D8PCB0	78.6	Phospholipid:diacylglycerol acyltransferase	0.424721	-0.364288	-0.159396	-0.948405	0.016057	0.100531	0.44051	4.09542e-09	11720	12496	19136	17697	10969	10771	9453	10751
C1_00900W	RRS1	A0A1D8PCC8	23.4	Ribosome biogenesis regulatory protein	0.273874	0.00697117	-0.252388	-0.51929	0.690176	1	0.689483	0.360131	817	979	1343	1122	671	858	620	1203
C1_00910W	TRI1	A0A1D8PCC6	29.2	SWIB domain-containing protein	-0.794428	-0.919802	0.93755	0.812176	0.466382	0.550603	0.339641	0.440328	118	129	80	81	116	383	169	130
C1_00920W	C1_00920W	Q5ABF8	146.1	Uncharacterized protein	-9.40939	-0.622748	0.348887	9.13552	3.47783e-07	0.830431	0.818969	1.24978e-06	65	157	0	0	138	145	108	111
C1_00930C	SIN3	A0A1D8PCC3	159.9	Transcriptional regulator	-0.692048	0.156411	-0.315365	0.533093	0.171958	0.937231	0.57948	0.310689	14955	18050	12676	10518	16788	9093	18810	16549
C1_00940W	RPB11	A0A1D8PCD0	14.2	DNA-directed RNA polymerase II core subunit	1.04639	0.0683586	0.224531	-0.753498	0.00153134	0.972273	0.602683	0.0314921	9543	7914	19590	21170	11406	8858	14168	11458
C1_00950C	CDC5	Q5ABG0	75	Serine/threonine-protein kinase (EC 2.7.11.21)	2.94075	0.180548	1.21207	-1.54813	0.233475	0.995538	0.668825	0.576926	85	0	324	419	111	87	102	170
C1_00960C	SET1	Q5ABG1	119.1	Histone-lysine N-methyltransferase, H3 lysine-4 specific (EC 2.1.1.43) (COMPASS component SET1) (SET domain-containing protein 1)	1.78872	0.283347	1.16361	-0.341761	0.550356	0.984095	0.703502	0.934891	0	176	380	303	292	79	277	291
C1_00990C	NMA111	A0A1D8PCD2	109.4	Nma111p	-1.03567	-0.0802564	0.830447	1.78586	0.00411213	0.967989	0.0240046	1.59517e-07	2986	2923	1940	1351	5926	4491	5323	6613
C1_01010W	C1_01010W	A0A1D8PCD3	17.8	Uncharacterized protein	0.611367	0.11023	-0.762383	-1.26352	0.0265482	0.915501	0.00373259	5.26638e-07	19205	29672	41257	42903	13593	15420	18717	18459
C1_01030W	HMT1	Q5A943	39.3	Protein-arginine omega-N methyltransferase	-0.332562	0.428768	0.277861	1.03919	0.535431	0.569482	0.593773	0.0125177	3945	3111	3548	2837	4987	3474	5928	7928
C1_01040W	C1_01040W	Q5A942	16.7	Peptide-methionine (R)-S-oxide reductase (EC 1.8.4.12)	0.0483202	-0.546097	0.185648	-0.408769	0.945379	0.21588	0.650637	0.25602	437	431	588	435	441	561	390	421
C1_01050C	C1_01050C	A0A1D8PCD8	36.2	Trans-2-enoyl-CoA reductase (NADPH)	-8.95674	-0.28198	1.45217	10.1269	9.02594e-07	0.953044	0.188061	3.20586e-08	95	66	0	0	203	244	131	307
C1_01060W	MBF1	Q5A940	16.3	Multiprotein-bridging factor 1	0.518976	-0.0351291	-0.189773	-0.743878	0.000865541	0.968247	0.300251	8.68116e-07	79335	80509	129285	129797	60176	82559	87016	76764
C1_01090C	C1_01090C	Q5A937	12	Mitochondrial 37S ribosomal protein RSM27	-9.13564	0	-8.9673	0	0.148032	1	0.140276	1	117	65	0	0	0	0	0	0
C1_01110C	ZPR1	Q5A934	57	Zinc finger-containing protein	-3.19165	0.0524546	-3.60564	-0.361533	4.93276e-108	0.942941	2.08379e-137	0.0393101	63083	67227	9220	7020	5105	5691	6971	6321
C1_01140C	C1_01140C	Q5A932	78.1	CBM21 domain-containing protein	0.15633	-0.15049	-0.619281	-0.926101	0.837476	0.942859	0.222549	0.0534656	2218	3113	2917	3748	1167	2425	1870	1870
C1_01150C	PPM2	Q5A931	78.8	tRNA wybutosine-synthesizing protein 4 (tRNA-yW synthesizing protein 4) (EC 2.1.1.290) (EC 2.3.1.231) (Leucine carboxyl methyltransferase 2) (tRNA(Phe) (7-(3-amino-3-(methoxycarbonyl)propyl)wyosine(37)-N)-methoxycarbonyltransferase) (tRNA(Phe) (7-(3-amino-3-carboxypropyl)wyosine(37)-O)-methyltransferase)	-0.252756	0.0894881	-0.911207	-0.568963	0.437601	0.937513	0.000231942	0.0342479	1310	1236	1235	1186	660	704	776	954
C1_01160C	C1_01160C	A0A1D8PCE7	29.9	Exosome non-catalytic core subunit	-1.0351	-0.332011	-1.22579	-0.522702	0.0525725	0.797754	0.0159288	0.395356	1578	3429	1343	1405	955	1207	1079	948
C1_01170C	ZCF17	A0A1D8PCF5	86	Zcf17p	-0.57771	0.37097	-0.549153	0.399528	0.102776	0.514275	0.113387	0.289629	3490	3984	2905	2763	2871	2190	3853	4062
C1_01190C	C1_01190C	Q5A927	53	N,N-dimethylaniline monooxygenase	0	0.62463	7.07866	7.88308	1	0.987063	0.267079	0.215963	0	0	0	0	0	55	43	49
C1_01220C	C1_01220C	Q5A924	27.3	Uncharacterized protein	0.303386	-1.62601	-0.42742	-2.35681	0.959413	0.778562	0.907822	0.409457	192	252	270	345	32	326	0	130
C1_01240W	IFD3	Q5A923	39.7	Ifd3p	-0.971441	-1.31624	1.60447	1.25967	0.800735	0.840082	0.593838	0.700901	140	88	77	56	305	402	0	340
C1_01250W	AIM9	Q5A922	71.4	Altered inheritance of mitochondria protein 9, mitochondrial (Found in mitochondrial proteome protein 29)	0.888573	-0.0444409	0.386423	-0.546591	0.0544359	0.990109	0.461318	0.281548	6902	6290	14367	13333	4987	13082	10001	10056
C1_01260C	TRS20	Q5A920	17.1	TRAPP subunit	-0.13809	0.249977	-0.315753	0.0723141	0.881367	0.869013	0.623573	0.936007	139	143	157	134	117	110	159	164
C1_01300W	C1_01300W	Q5A915	36.9	Uncharacterized protein	-0.128755	0.233991	-0.100645	0.262101	0.74515	0.657633	0.785324	0.407671	2680	3729	3539	3101	2840	3179	4432	3970
C1_01320W	MRS7	A0A1D8PCG9	58.1	Mrs7p	-0.109449	0.194642	0.172007	0.476098	0.507283	0.299545	0.223612	8.58318e-05	1955	1990	2153	1992	2055	2442	3042	3055
C1_01330C	DUT1	P0CY19	16.9	Deoxyuridine 5'-triphosphate nucleotidohydrolase (dUTPase) (EC 3.6.1.23) (dUTP pyrophosphatase)	-0.683647	0.428112	-0.748167	0.363593	0.331541	0.760404	0.258525	0.643836	2568	5711	3495	2365	2956	1867	3949	3962
C1_01350C	TIF1	P87206	44.6	ATP-dependent RNA helicase eIF4A (EC 3.6.4.13) (Eukaryotic initiation factor 4A) (eIF-4A) (Translation initiation factor 1)	-0.350958	-0.0242173	-0.222204	0.104537	0.0570348	0.981527	0.25885	0.658752	70764	67864	67299	56264	48264	73386	69002	71157
C1_01360C	C1_01360C	A0A1D8PCG4	75.9	Glycogenin glucosyltransferase	1.09116	-0.0328862	1.14772	0.0236739	0.00854461	0.996933	0.00474799	0.982841	913	711	1902	2013	2031	1542	1881	2349
C1_01370C	RPS21B	A0A1D8PCG7	9.6	40S ribosomal protein S21	0.624911	-0.575737	-0.447255	-1.6479	0.106444	0.265683	0.264753	7.40873e-07	25444	30071	40669	55338	14600	27414	17019	15673
C1_01380C	TRM2	A0A1D8PCG3	62.4	Trm2p	-3.06566	-0.745156	0.0933346	2.41384	0.178577	0.929799	0.981035	0.305142	274	367	91	0	314	377	217	272
C1_01390C	HOT1	A0A1D8PCG5	68.1	GCR1_C domain-containing protein	0	-2.9266	8.609	5.86219	1	0.846241	0.160269	0.390094	0	0	0	0	132	0	0	23
C1_01450W	ABC1	A0A1D8PCI9	64	Protein kinase	-0.899556	-0.165143	-1.27258	-0.538164	0.000962841	0.828549	9.97207e-07	0.0716263	22068	25850	14267	14740	7251	13187	10272	10921
C1_01460W	C1_01460W	A0A1D8PCH1	112.3	ArAE_2 domain-containing protein	1.53707	-8.54611	1.15093	-8.93225	0.74916	0.0463025	0.797836	0.0141437	51	0	89	81	78	33	0	0
C1_01470W	C1_01470W	A0A1D8PCH2	48	mRNA-binding protein	-0.40141	0.613533	0.0949872	1.10993	0.626823	0.580097	0.919317	0.08184	13990	16445	14561	11630	22706	8582	24705	35012
C1_01480C	RPS21	Q5A900	26.9	Ribosomal 40S subunit protein S2	0.422696	-2.84715	2.82882	-0.441026	0.509624	1.3169e-09	2.62572e-10	0.472461	2589	3563	4910	4425	13087	32497	4388	2855
C1_01490W	C1_01490W	Q5A8Z9	21.8	Uncharacterized protein	-0.691925	0.0260412	0.847485	1.56545	0.000683452	0.984095	1.76758e-05	2.6966e-16	39744	36157	31138	22489	69184	67873	80878	86003
C1_01520C	SOD2	Q5A8Z4	26.2	Superoxide dismutase (EC 1.15.1.1)	0.28913	0.0186635	-0.485359	-0.755825	0.642668	1	0.345535	0.116594	1298	976	1665	1493	561	1124	896	1083
C1_01530C	C1_01530C	A0A1D8PCI5	70.7	Arginine--tRNA ligase	-0.71849	0.163803	-0.394427	0.487866	0.00524341	0.805549	0.162388	0.0767197	17005	19046	14314	10641	10456	17728	17534	19298
C1_01540W	C1_01540W	Q5A8Z2	70.6	UBA domain-containing protein	1.12911	0.716985	-0.0772227	-0.489347	0.0447135	0.406588	0.928851	0.461858	264	540	939	1037	365	400	752	743
C1_01550W	VPS17	Q5A8Z0	59.9	Vacuolar protein sorting-associated protein 17	0.161946	0.117649	0.923487	0.87919	0.921254	0.981527	0.326715	0.367743	147	133	181	174	354	162	254	440
C1_01560W	SIZ1	A0A1D8PCK0	174.4	SUMO ligase	0.312571	0.288075	1.10215	1.07765	0.542033	0.752941	0.00405823	0.00590244	466	354	650	511	937	823	1288	1293
C1_01580W	C1_01580W	Q5A8Y6	20.3	Mitochondrial 54S ribosomal protein YmL23	-0.329644	-0.0571078	0.014172	0.286709	0.338778	0.972467	0.979303	0.409457	6758	4689	5765	4622	5410	6304	6956	6386
C1_01590C	C1_01590C	Q5A8Y5	139.8	DNA-directed RNA polymerase subunit beta (EC 2.7.7.6)	-0.6051	0.289787	0.185501	1.08039	0.00104095	0.306244	0.406754	7.96196e-10	4626	4126	3727	2832	4588	5494	7003	7602
C1_01600W	MRP20	A0A1D8PCJ1	34.4	Mitochondrial 54S ribosomal protein YmL41	-1.20602	-0.200778	-0.429544	0.575694	4.4124e-05	0.80089	0.215154	0.0857828	2056	1905	1051	900	1578	1356	1406	1667
C1_01610C	C1_01610C	A0A1D8PCI8	32.8	Protein YOP1	4.79036	-0.35123	9.1856	4.04401	0.171353	0.981527	0.00207786	0.160056	0	0	0	11	88	131	78	124
C1_01620C	C1_01620C	A0A1D8PCJ0	37.3	Uncharacterized protein	0.0374144	-0.128655	-0.733708	-0.899777	0.984032	0.957054	0.150044	0.0712831	4073	4273	5068	4641	3088	1833	3179	2309
C1_01630W	C1_01630W	A0A1D8PCJ4	25.9	CIA30 domain-containing protein	-0.385859	-0.916486	0.932691	0.402064	0.679541	0.363224	0.187809	0.6438	192	128	152	127	221	411	224	164
C1_01650W	ISN1	Q5A8X9	52.4	IMP-specific 5'-nucleotidase 1 (EC 3.1.3.99)	8.20632	-9.70299	9.44141	-8.4679	0.201877	0.222349	0.117387	0.176876	0	0	0	117	0	283	0	0
C1_01680C	FYV4	Q5A8X7	19.8	Protein FYV4, mitochondrial	0.0881133	-0.0886529	-0.426134	-0.6029	0.731572	0.862031	0.0134325	0.000297251	2570	2459	3388	2696	1692	2104	2061	2161
C1_01690C	LSC1	Q5A8X6	33.7	Succinate--CoA ligase [ADP-forming] subunit alpha, mitochondrial (EC 6.2.1.5) (Succinyl-CoA synthetase subunit alpha) (SCS-alpha)	-0.317479	0.0515038	0.402894	0.771877	0.00947313	0.909122	0.000555289	4.78828e-12	30098	30548	28708	26460	34239	47465	49962	49637
C1_01700W	ARP8	A0A1D8PCJ9	121.3	Actin-related protein 8	-0.481902	0.130394	0.575777	1.18807	0.0210278	0.802723	0.00409639	3.35859e-10	31746	27965	27476	21250	44702	44710	54022	62991
C1_01740W	CTN1	Q59T80	90.3	Carnitine O-acetyltransferase	0.0529268	0.400369	-0.105144	0.242298	0.973696	0.748989	0.898927	0.753546	56494	59674	75098	61863	74079	30235	79879	91113
C1_01790W	SWI4	A0A1D8PCM9	114.4	SBF complex DNA-binding subunit	-1.0538	0.367954	-0.990014	0.431745	0.104012	0.81209	0.120478	0.576165	749	1114	551	466	566	354	576	876
C1_01800W	C1_01800W	Q59T87	26.9	Uncharacterized protein	0.61503	-0.278169	0.168816	-0.724383	0.188676	0.787761	0.770575	0.101405	893	972	1511	1709	756	1407	1144	924
C1_01820C	C1_01820C	Q59T89	45.9	TFIIH complex kinase subunit	-0.47915	-0.153099	0.707237	1.03329	0.408725	0.940536	0.156197	0.0298772	214	196	200	136	339	333	329	394
C1_01830C	UBC8	Q59T91	21.5	E2 ubiquitin-conjugating protein	0.081407	-0.29527	0.369459	-0.00721806	0.83388	0.436689	0.140276	0.992314	6914	6832	7938	8490	9288	8464	8352	9007
C1_01840C	C1_01840C	Q59T92	21.3	Uncharacterized protein	-1.11448	21.2259	-21.9302	0.410266	0.832683	3.58903e-10	1.00262e-11	0.94534	0	450	167	70	0	0	189	137
C1_01850C	C1_01850C	Q59T93	31.2	RRM domain-containing protein	-11.8458	0.718592	-1.97651	10.5879	3.84464e-13	0.546262	0.00198219	3.0366e-10	572	624	0	0	132	177	370	227
C1_01860W	C1_01860W	Q59T94	34	Uncharacterized protein	0.159547	-0.0718691	0.680372	0.448956	0.786754	0.973629	0.0788609	0.29461	765	1098	1291	1069	1244	1797	1901	1490
C1_01870C	CYS4	Q59T95	53.9	Cystathionine beta-synthase (EC 4.2.1.22)	0.230624	-0.644881	-0.531674	-1.40718	0.680833	0.253017	0.219312	0.000184716	98121	107861	128746	143758	43475	105185	54542	54632
C1_01900C	C1_01900C	A0A1D8PCL3	56.7	Uncharacterized protein	-0.180488	-0.258352	0.0330449	-0.0448191	0.561924	0.545389	0.930677	0.911301	2885	3395	3025	3228	3168	3287	2959	3482
C1_01910W	C1_01910W	A0A1D8PCL4	39.9	Uncharacterized protein	-0.177274	-0.0172044	-0.439329	-0.279259	0.233423	0.981527	0.000379629	0.0375119	5785	6610	6440	5975	4208	5037	5438	5380
C1_01930W	C1_01930W	A0A1D8PCL8	40.6	AMPK1_CBM domain-containing protein	-0.296348	0.175185	0.704627	1.17616	0.113849	0.569482	8.31242e-06	2.27045e-14	1458	1668	1472	1409	2389	2755	3310	3584
C1_01940C	C1_01940C	Q59TA2	18.6	Signal recognition particle subunit	-0.425906	-0.0106333	0.281702	0.696975	0.523539	1	0.674945	0.229234	3523	4096	3287	3131	6020	2988	5169	5852
C1_01980W	HGT1	A0A1D8PCL1	60.6	High-affinity glucose transporter 1	0.477731	-0.250472	0.914451	0.186248	0.225807	0.760404	0.00704821	0.695413	6400	5557	9800	9091	9462	13561	8355	14471
C1_02000W	C1_02000W	A0A1D8PCP9	38.1	Uncharacterized protein	-1.74852	0.394974	0.761653	2.90514	0.525977	0.974474	0.79905	0.224353	189	129	113	0	215	339	296	560
C1_02030C	C1_02030C	Q59TA9	16.4	Cytochrome b5 heme-binding domain-containing protein	1.84404	0.539694	0.353192	-0.951156	3.57007e-05	0.516195	0.551331	0.0548048	237	316	1276	981	395	305	542	689
C1_02040C	C1_02040C	A0A1D8PCM4	94.6	Putative ubiquitin-specific protease	-0.634469	2.30166	-1.7664	1.16973	0.871878	0.569482	0.509127	0.699444	645	587	549	359	333	0	1156	983
C1_02050C	PHO91	Q59VZ6	95.1	Pho91p	1.70187	9.45823	-8.08964	-0.333277	0.20891	3.29896e-06	3.13309e-05	0.857765	66	33	205	163	0	0	209	97
C1_02110C	HGT2	Q59VZ0	60.4	Hgt2p	-0.883257	-0.58065	0.114048	0.416655	1.51419e-07	0.00330881	0.627753	0.0270276	10933	10658	7194	6106	9531	14376	9149	9591
C1_02130C	GAL1	Q59VY8	57.1	Galactokinase	1.13396	-0.276958	1.02621	-0.384701	1.57797e-40	0.0118095	3.13339e-33	3.69314e-05	59181	59783	157994	138354	116826	127349	116329	123480
C1_02150W	GAL10	A0A1D8PCN0	75.4	Bifunctional UDP-glucose 4-epimerase/aldose 1-epimerase	-0.467807	-0.237995	0.192134	0.421946	0.0969495	0.643234	0.551773	0.136069	73794	67255	57633	57811	59338	106922	79115	84865
C1_02160W	C1_02160W	Q59VY5	18.4	TRAPP subunit	0	-7.4414	7.17982	0	1	0.414237	0.258795	1	0	0	0	0	0	59	0	0
C1_02170C	GAL102	Q59VY4	36.5	Gal102p	-0.313318	-0.615852	1.2477	0.945162	0.704475	0.544517	0.0293022	0.122359	543	598	453	579	798	2034	1031	1088
C1_02180W	GAL7	A0A1D8PCM2	44.7	Galactose-1-phosphate uridylyltransferase (EC 2.7.7.12)	-0.353955	-0.397825	0.450081	0.406211	0.195452	0.25248	0.0735138	0.118401	24140	26819	24978	20336	26327	45259	30513	32820
C1_02190W	ABP140	Q59VY2	36.7	Methyltransferase-like protein (EC 2.1.1.-)	-0.487211	-0.170259	-0.933876	-0.616923	0.209565	0.873919	0.00569566	0.0937892	482	450	369	383	236	256	258	262
C1_02220C	C1_02220C	Q59VX9	28.7	NAD(P)H-hydrate epimerase (EC 5.1.99.6) (NAD(P)HX epimerase)	0.364055	-0.208661	2.25549	1.68278	0.74515	0.95218	0.00156764	0.0261904	770	789	1221	1057	5469	1649	3633	4095
C1_02230W	SEP7	Q59VX8	75.8	Septation protein 7 (Seventh homolog of septin 1)	0.704422	0.0823802	0.670357	0.0483153	0.00232402	0.937011	0.00372396	0.904433	3110	2924	6134	5049	5006	4601	5704	6501
C1_02240W	C1_02240W	Q59VX7	96.5	Karyopherin beta	1.32321	-0.0927215	1.52044	0.104505	0.00667929	0.973629	0.00131607	0.898031	311	246	767	810	537	1123	895	904
C1_02260C	AGE3	A0A1D8PCP6	41.9	Age3p	0.189505	-0.0373833	-0.141906	-0.368794	0.285444	0.966347	0.428314	0.0163953	19916	20878	29985	22984	17472	19851	22192	20963
C1_02270C	C1_02270C	A0A1D8PCP4	30.7	Uncharacterized protein	-0.338568	-0.757649	0.458985	0.0399033	0.424161	0.0700644	0.222196	0.953659	1413	2123	1676	1489	2111	2821	1503	1941
C1_02290C	C1_02290C	A0A1D8PCP8	47.3	ATP synthase complex assembly protein	-1.11326	-0.375627	0.0150141	0.752644	0.026861	0.737896	0.989006	0.16517	9318	11544	5789	5139	13573	6945	10659	8762
C1_02300W	C1_02300W	Q59VX1	13.8	Prefolding complex chaperone subunit	-0.332858	-0.596578	-1.71266	-1.97638	0.751944	0.681689	0.0133558	0.00437475	874	2291	1231	1578	332	662	351	411
C1_02310C	GON7	Q59W04	13.4	EKC/KEOPS complex subunit GON7	0.182491	-0.193661	-1.07047	-1.44662	0.939014	0.976138	0.399096	0.239452	241	2074	1214	1703	465	647	558	586
C1_02320C	C1_02320C	A0A1D8PCP7	61.8	Bifunctional fructose-2,6-bisphosphate 2-phosphatase/6-phosphofructo-2-kinase	-0.0991251	-0.280767	0.243358	0.0617159	0.794823	0.484197	0.375182	0.868759	1053	1144	1175	1146	1275	1341	1181	1387
C1_02330C	C1_02330C	A0A1D8PCQ5	14.2	Ribosomal 60S subunit protein L26B	-0.178832	0.358752	-1.27178	-0.734196	0.584516	0.336357	1.21087e-08	0.00243028	33485	41386	37062	37637	12221	19539	25236	22318
C1_02400C	MNN11	A0A1D8PCR3	51.5	Alpha-1,6-mannosyltransferase	2.67313	-0.269207	3.06195	0.119618	4.03985e-25	0.632363	7.74851e-33	0.779313	366	449	2844	3021	2804	4143	2985	3789
C1_02410C	C1_02410C	A0A1D8PCS2	40.2	Uncharacterized protein	-0.916441	-0.23867	-0.792501	-0.11473	0.820694	0.990588	0.818969	0.98578	256	108	75	141	131	76	0	218
C1_02420C	GSC1	A0A1D8PCT0	218	1,3-beta-glucan synthase	-0.0172007	0.412125	-0.215004	0.214322	0.988973	0.218323	0.448412	0.467788	12321	11111	16023	10471	9509	10898	16370	15845
C1_02430C	C1_02430C	A0A1D8PCQ3	71	Eukaryotic translation initiation factor 2A (eIF-2A)	-0.44957	-0.0885339	0.00459155	0.365627	0.0826575	0.932206	0.994269	0.171313	4871	4902	4045	4051	3970	6064	4910	6162
C1_02440C	C1_02440C	A0A1D8PCR2	37.8	Ubiquitin-specific protease	0.322084	-0.407068	0.699194	-0.029958	0.815662	0.873623	0.485045	0.989592	162	65	153	169	176	198	134	202
C1_02450C	C1_02450C	A0A1D8PCR9	20.7	C2H2-type domain-containing protein	-0.230368	0.80121	-2.44198	-1.4104	0.905638	0.72648	0.0173111	0.222646	4980	1241	5166	1087	403	791	1209	1201
C1_02460W	RPL10	Q5AIB8	25.2	Ribosomal 60S subunit protein L10	0.125394	-0.31227	-0.141333	-0.578996	0.701337	0.374452	0.624018	0.0109118	38321	41760	48402	50275	28525	45930	36771	33234
C1_02480W	PMM1	P31353	29	Phosphomannomutase (PMM) (EC 5.4.2.8)	0.405257	-0.412625	-0.066623	-0.884505	0.354643	0.512689	0.906426	0.0159656	15698	17407	25184	24422	10243	22612	15108	13313
C1_02490C	C1_02490C	Q5AIB5	77.4	Uncharacterized protein	-0.804705	-0.384379	-0.558475	-0.138149	0.00252414	0.367415	0.0452658	0.71586	18779	20692	13641	11991	10312	17213	10467	14189
C1_02500W	C1_02500W	Q5AIB4	23.7	Uncharacterized protein	10.5674	-0.209625	10.9631	0.186096	8.1504e-09	0.973629	1.96485e-09	0.922118	0	0	467	179	182	593	420	340
C1_02510W	C1_02510W	Q5AIB3	28.2	Protein transport protein BOS1	0.37662	0.0855467	-0.729443	-1.02052	0.304685	0.956882	0.019336	0.000743751	4979	5444	6799	8420	2418	4038	3763	4236
C1_02520W	SCW4	Q5AIB2	57.5	Scw4p	-0.0652888	-0.480355	-0.424014	-0.839081	0.951883	0.571683	0.439019	0.089173	1485	1870	1890	1740	1445	1023	1251	889
C1_02530C	DIP5	A0A1D8PCR4	65.2	Dip5p	0.00348367	0.89358	-0.371816	0.51828	1	0.396632	0.671402	0.54148	1038	776	1040	1022	952	408	1526	1603
C1_02590C	SNZ1	Q5AIA6	31.8	Pyridoxine biosynthesis protein	-1.36337	-0.499104	-0.631341	0.232927	7.1605e-40	2.59175e-05	4.99854e-09	0.0629032	169416	155317	72136	70806	96060	116379	85512	92507
C1_02600W	SNO1	A0A1D8PCS7	28.4	Putative pyridoxal 5'-phosphate synthase	0	0.56445	7.40571	8.14994	1	0.98993	0.240283	0.197626	0	0	0	0	0	69	42	69
C1_02620C	HOM6	Q5AIA2	38.8	Homoserine dehydrogenase (HDH) (EC 1.1.1.3)	-1.00838	-0.0663261	-0.843093	0.0989633	4.17e-11	0.919452	5.32258e-08	0.669576	64558	60030	35128	34981	28810	42175	39690	39864
C1_02630C	EXG2	Q5AIA1	54.5	Glucan 1,3-beta-glucosidase 2 (EC 3.2.1.58) (Exo-1,3-beta-glucanase 2)	-0.189095	0.0771986	-1.58129	-1.315	0.891837	0.98993	0.0343018	0.0935416	540	381	552	373	184	120	133	259
C1_02640C	TOM20	Q5AIA0	19	Tom20p	0.0176174	0.864439	-1.2966	-0.449779	1	0.82308	0.453247	0.841496	2929	3427	3907	3391	2330	54	2893	2746
C1_02650W	C1_02650W	A0A1D8PCU5	22.6	Uncharacterized protein	0.475785	0.0779669	0.343584	-0.0542337	0.0315287	0.932343	0.137567	0.874691	15076	11981	21326	21308	14694	20343	20545	22999
C1_02660C	MGM101	Q5AI97	30.7	Mitochondrial genome maintenance protein MGM101	0.22168	0.315469	0.0663907	0.16018	0.491627	0.440408	0.854923	0.632188	1970	1797	2489	2484	1607	2430	2733	3161
C1_02710W	FRS2	A0A1D8PCT4	56.4	Phenylalanine--tRNA ligase subunit alpha	0.228851	0.214053	0.373627	0.358829	0.496711	0.706874	0.192378	0.224797	11682	17456	20198	18425	18873	18931	25702	26671
C1_02720W	C1_02720W	Q5AI92	45.9	C2H2-type domain-containing protein	-2.23738	-0.154131	-1.85826	0.224989	0.448314	1	0.518039	0.965075	1776	427	0	507	267	356	258	404
C1_02750C	C1_02750C	A0A1D8PCV8	89.9	Uncharacterized protein	-0.532765	0.453108	-0.837197	0.148676	0.117204	0.337175	0.00602368	0.734138	9607	10512	7670	8036	6309	4855	8526	9966
C1_02760W	GET3	P0CB54	39.6	ATPase GET3 (EC 3.6.-.-) (Arsenical pump-driving ATPase) (Arsenite-stimulated ATPase) (Golgi to ER traffic protein 3) (Guided entry of tail-anchored proteins 3)	-0.457958	0.151784	0.297051	0.906793	0.449565	0.942919	0.631112	0.0757283	1872	1951	2179	1027	1992	2796	2509	3764
C1_02780W	C1_02780W	Q5AI87	28.4	Carboxymethylenebutenolidase	0.202362	1.19123	0.251897	1.24077	0.980182	0.862031	0.94568	0.699444	199	229	292	266	468	0	687	708
C1_02790W	TIF34	Q5AI86	38.2	Eukaryotic translation initiation factor 3 subunit I (eIF3i) (Eukaryotic translation initiation factor 3 39 kDa subunit homolog) (eIF-3 39 kDa subunit homolog)	-0.176321	-0.67839	-0.233058	-0.735127	0.751134	0.17275	0.618634	0.0555543	22462	21365	22550	21402	11892	26945	14504	13420
C1_02810W	RAD16	Q5AI84	97.3	DNA repair protein	0.923023	-0.312268	1.08699	-0.148303	0.886867	0.99363	0.823335	0.9875	0	64	0	129	66	69	51	79
C1_02820W	LYS2	A0A1D8PCV7	155.2	L-aminoadipate-semialdehyde dehydrogenase	-0.644432	0.168039	-0.710045	0.102426	0.000224114	0.641091	3.58828e-05	0.68547	29114	27083	22192	18679	17515	16933	23553	22724
C1_02850W	VTS1	Q5AI80	74.7	Protein VTS1	-0.220349	-0.0806472	-0.0132641	0.126438	0.212022	0.856426	0.957836	0.520618	7478	7006	7037	7035	6260	8344	8211	8062
C1_02860C	YKT6	Q5AI79	22.9	Palmitoyltransferase	0.207488	-1.17166	0.490287	-0.888859	0.822677	0.0964621	0.460769	0.143263	14584	19861	25399	19793	11441	39645	13126	12562
C1_02870W	YPT7	Q5AI78	32	Ypt7p	1.76747	-7.44273	-0.280854	-9.49106	0.689408	0.0926774	0.954233	0.00698301	27	38	106	142	0	59	0	0
C1_02880C	MIA40	O94030	27.9	Mitochondrial intermembrane space import and assembly protein 40 (Mitochondrial import inner membrane translocase TIM40)	2.05168	0.982088	1.43261	0.363017	1.88524e-43	8.59495e-10	2.8237e-21	0.0378147	1572	1442	6917	7213	3773	4462	9218	10070
C1_02890C	C1_02890C	Q5AI75	14.2	Uncharacterized protein	-0.140165	-0.833917	1.25172	0.55797	0.619772	4.33825e-05	1.10878e-11	0.00681428	1126	1240	1325	1113	2788	2873	1850	1938
C1_02920W	CDC73	A0A1D8PCW7	42.5	Cdc73p	-0.848659	-0.0716544	0.933858	1.71086	0.167689	0.981527	0.105083	0.00137416	368	355	234	221	539	879	1008	561
C1_02930C	MST1	A0A1D8PCV0	52.3	Threonine--tRNA ligase	4.54206	-2.94781	5.39953	-2.09033	2.53256e-05	0.026967	3.31622e-07	0.0868358	145	107	3486	3184	731	10910	1044	605
C1_02940C	C1_02940C	Q5AI68	18.6	Uncharacterized protein	2.27754	-0.0177572	3.10165	0.806355	2.0239e-05	1	2.08986e-09	0.206389	519	304	2312	2222	4457	2475	4510	3873
C1_02970W	C1_02970W	A0A1D8PCX5	48.1	Aminotran_5 domain-containing protein	1.23636	-0.322513	1.56388	0.00501357	0.000998927	0.693384	1.57201e-05	1	415	280	960	900	933	1155	1065	907
C1_02980W	GOR1	A0A1D8PCW3	37.8	Glyoxylate reductase	-0.277532	-0.532209	0.309828	0.055152	0.263718	0.0322178	0.1825	0.869844	1643	1582	1720	1311	1763	2300	1608	1708
C1_03010W	RPP1A	Q9HFQ7	11	60S acidic ribosomal protein P1-A (CaRP1A)	3.42546	1.26003	1.0838	-1.08163	0.369738	0.917794	0.805534	0.817666	0	51	441	184	0	118	197	108
C1_03020C	RPL13	O59931	23	60S ribosomal protein L13	1.08231	-2.7055	1.34893	-2.43888	0.556161	0.150945	0.413831	0.105811	12394	16599	32865	36285	3561	77262	7560	5962
C1_03030W	RPS16A	A0A1D8PCW6	15.7	Ribosomal 40S subunit protein S16A	-0.00167099	0.291477	-1.19863	-0.905478	1	0.910843	0.104354	0.255447	36586	56576	60042	45671	29959	8703	26334	33157
C1_03050W	C1_03050W	A0A1D8PCY2	118.7	Uncharacterized protein	2.32475	-0.0479254	2.25026	-0.122412	0.375109	1	0.363847	0.982841	0	409	1505	818	984	940	1153	1073
C1_03060C	TSR2	Q5AI56	24	Tsr2p	1.93878	0.183981	1.71615	-0.0386518	0.0174948	0.967436	0.0364746	0.98554	70	70	364	249	310	136	326	300
C1_03070C	ORC1	A0A1D8PCY1	91.1	Origin recognition complex subunit 1	-0.52158	-0.141346	1.23427	1.6145	0.941939	1	0.79098	0.726395	113	0	95	0	122	151	136	157
C1_03090W	RPS1	P40910	29	40S ribosomal protein S1 (S3aE)	0.360683	-0.146603	0.265342	-0.241944	0.000962405	0.423526	0.0192325	0.038969	155879	171219	250734	225434	169965	229998	212898	212585
C1_03100W	C1_03100W	A0A1D8PCX0	158.3	Uncharacterized protein	-0.00754689	0.0744372	0.611266	0.69325	0.998437	0.876579	2.18917e-05	1.61037e-06	9026	9784	11267	9958	12101	17198	17174	19106
C1_03110W	RPL6	A0A1D8PCX8	19.8	60S ribosomal protein L6	-0.0929312	0.0971719	-0.340366	-0.150263	0.895757	0.961901	0.448412	0.788252	40518	38392	46291	37871	19347	45677	41096	38816
C1_03120W	C1_03120W	Q5AI48	46.4	FAS1 domain-containing protein CaO19.3004	0.545009	0.786259	-0.706341	-0.465091	0.303621	0.20953	0.145058	0.389716	1902	3490	4416	4449	1785	1493	3685	3112
C1_03130C	GGA2	A0A1D8PCX6	64.7	Phosphatidylinositol 4-phosphate-binding protein	3.16349	-0.813542	1.35214	-2.62489	4.40662e-09	0.384011	0.0237983	2.49321e-06	3018	4361	30646	43334	4582	15273	6838	5967
C1_03150C	C1_03150C	A0A1D8PCZ2	25.1	Uncharacterized protein	-0.874325	-0.433671	1.56451	2.00516	0.000937678	0.262297	1.14202e-10	2.76447e-16	702	806	554	384	2053	2458	1889	2069
C1_03190C	ECM33	A0A1D8PCY4	43.5	Ecm33p	-0.378697	0.162076	-0.435299	0.105475	0.0146402	0.564175	0.00370163	0.600434	61408	64621	52651	56770	45103	48765	62601	62366
C1_03200C	ARO80	A0A1D8PCY0	118.3	Aro80p	0.705922	0.0344688	0.181623	-0.489831	0.46258	1	0.87148	0.626352	57	110	164	144	92	98	137	94
C1_03210C	CDC12	A0A1D8PCY5	45.8	Septin	0.283433	0.00214352	-0.455494	-0.736784	0.507738	1	0.214045	0.0309724	14299	23287	23518	27856	11372	16535	16009	16808
C1_03220C	BMH1	O42766	29.5	14-3-3 protein homolog	0.115575	-0.10285	0.35786	0.139434	0.691606	0.862708	0.0931452	0.598523	57972	59791	76156	68545	58628	96323	83480	84972
C1_03230C	ARX1	Q5AI37	62.2	Probable metalloprotease ARX1 (EC 3.-.-.-) (Associated with ribosomal export complex protein 1)	-1.3187	-0.0636595	-0.797337	0.457701	2.63115e-30	0.876843	1.73075e-11	0.000350645	8044	7534	3662	3419	3979	5128	5103	5184
C1_03240W	C1_03240W	A0A1D8PD02	15.9	Uncharacterized protein	-2.10105	-0.0499555	-0.424715	1.62638	2.22939e-10	0.981527	0.292881	2.41647e-06	461	473	131	116	348	351	423	382
C1_03250C	SPP1	Q5AI35	47.1	Spp1p	0.0988132	0.676042	-1.21666	-0.639433	0.855229	0.0947827	5.10661e-05	0.055014	1224	1605	1745	1680	627	590	1080	1250
C1_03280W	C1_03280W	Q5AI30	35.8	37S ribosomal protein S24, mitochondrial	3.38016	-0.717419	3.25862	-0.838954	1.44064e-13	0.368607	1.24301e-12	0.130754	5068	6152	70094	62302	26862	86302	42398	35689
C1_03290W	NGG1	Q5AI28	70.7	Histone acetyltransferase	-0.238176	-0.266508	0.76967	0.741338	0.744281	0.835063	0.132947	0.157867	134	137	119	140	216	251	209	252
C1_03300C	MAS1	A0A1D8PCY8	51.1	Mas1p	1.65859	0.277924	0.737844	-0.642826	3.46408e-08	0.688915	0.0265736	0.0636468	4540	4750	17652	15623	8932	6380	10333	12207
C1_03310W	C1_03310W	A0A1D8PCZ5	43	Uncharacterized protein	0.0898607	-0.723344	1.42685	0.613646	0.839426	0.0160992	3.26409e-09	0.0239807	1912	1653	2205	2097	3762	6082	3409	3559
C1_03320C	EHD3	Q5AI24	56.2	3-hydroxyisobutyryl-CoA hydrolase, mitochondrial (EC 3.1.2.4) (3-hydroxyisobutyryl-coenzyme A hydrolase)	-1.14531	-0.30278	-0.685953	0.15658	3.58256e-05	0.579453	0.0206776	0.700901	5522	4968	2976	2421	3485	3023	2820	3532
C1_03340C	SEC62	Q5AI21	33.3	Translocation protein SEC62	-0.0437491	-0.164496	-0.423496	-0.544242	0.929746	0.77946	0.0934054	0.026754	12961	14227	13315	16354	10088	10266	10457	11224
C1_03350C	RLI1	Q5AI20	69.5	Fe-S cluster-binding ribosome biosynthesis protein	-1.22547	0.117001	-0.762018	0.580453	1.51127e-06	0.908286	0.0047758	0.0431802	23466	30371	16232	10084	14865	17162	19615	21618
C1_03360W	C1_03360W	A0A1D8PCZ6	161.6	Chromatin-remodeling ATPase	1.11044	1.20065	0.209062	0.299268	0.0206201	0.0282582	0.747218	0.632623	960	718	2621	1540	1084	845	2839	2510
C1_03370W	PAB1	Q5AI15	70.4	Polyadenylate-binding protein, cytoplasmic and nuclear (PABP) (Poly(A)-binding protein) (Polyadenylate tail-binding protein)	0.04717	-0.316131	-0.426927	-0.790229	0.832735	0.0484764	0.000892732	1.36733e-10	140129	161994	173880	178712	103839	123345	107532	108669
C1_03380W	TPS2	Q5AI14	100.3	Trehalose-phosphatase	-0.822797	-0.00904617	-0.683847	0.129904	0.00155368	1	0.009852	0.731067	9446	9457	5550	6493	4666	7398	6487	7547
C1_03390W	EHT1	A0A1D8PD05	48	Medium-chain fatty acid ethyl ester synthase/esterase	0.495555	0.926708	-0.767323	-0.33617	0.239553	0.0300495	0.0402082	0.45568	3368	2703	5334	4410	1618	2003	4969	3142
C1_03430W	C1_03430W	Q5AI09	40.2	Triglyceride lipase	-1.25408	-1.10178	0.872222	1.02453	0.695869	0.869013	0.778914	0.746185	103	158	130	0	216	267	137	129
C1_03440C	C1_03440C	Q5AI07	52.2	Aldedh domain-containing protein	-1.40595	-0.500933	-0.90258	0.00244056	0.000667708	0.500662	0.0392064	1	3720	4032	1717	1597	1348	2961	1496	2023
C1_03490W	C1_03490W	Q5AI01	33.5	TLC domain-containing protein	1.16437	1.30069	0.129957	0.266273	0.0657952	0.0811993	0.884709	0.757055	1624	792	3143	3017	809	1963	4010	3829
C1_03500W	YPT1	Q5AI00	23	Rab family GTPase	-0.455332	-0.317895	-0.258429	-0.120993	0.237708	0.622484	0.529604	0.809795	1545	1408	1481	982	1235	1246	1075	1304
C1_03510C	C1_03510C	A0A1D8PD11	20.3	Uncharacterized protein	-0.184078	-0.22742	-0.116088	-0.159429	0.536868	0.593471	0.702722	0.594208	14786	13846	14336	14196	10379	16739	14103	12941
C1_03520W	RPN3	A0A1D8PD15	54.9	Proteasome regulatory particle lid subunit	-0.155352	0.45128	-0.501522	0.10511	0.534537	0.0492533	0.00783931	0.691467	33054	36941	39967	31515	25199	24315	41207	39747
C1_03530W	SRB4	Q5AHZ7	65.6	Mediator of RNA polymerase II transcription subunit 17 (Mediator complex subunit 17)	4.6767	-0.317523	5.73539	0.741173	4.15374e-23	0.822764	1.73272e-34	0.21757	266	312	8357	8351	20631	9189	14420	15183
C1_03540C	C1_03540C	A0A1D8PD24	15.7	Uncharacterized protein	0.577577	1.21175	0.0421435	0.67632	0.895757	0.855267	0.994721	0.850343	96	51	154	98	0	168	208	214
C1_03550C	COQ6	Q5AHZ4	53.2	Ubiquinone biosynthesis monooxygenase COQ6, mitochondrial (EC 1.14.13.-)	-0.0277497	-0.633905	0.761082	0.154926	0.998437	0.558038	0.255818	0.869662	314	287	340	328	303	762	403	384
C1_03560C	SUA71	Q5AHZ3	37.9	Transcription factor TFIIB	-0.997435	-1.49994	-0.330772	-0.83328	0.779084	0.789	0.925861	0.804488	312	257	163	160	172	294	0	195
C1_03600W	C1_03600W	Q5AHZ2	30.9	Dolichyl-diphosphooligosaccharide--protein glycosyltransferase subunit 2	0.894876	0.423832	0.00507435	-0.465969	0.00483308	0.413388	0.995073	0.194178	1476	1351	2572	3340	1284	1594	2048	2524
C1_03640C	HFL1	Q5AHY9	26	DNA polymerase epsilon noncatalytic subunit	0.0944163	0.439329	-0.758337	-0.413424	0.956255	0.810555	0.353026	0.668881	2523	4148	4065	3972	2810	966	3107	3286
C1_03650C	MRPL27	Q5AHY8	19.3	Mitochondrial 54S ribosomal protein YmL27	1.03264	0.0153492	0.818357	-0.198933	9.98057e-06	1	0.000650951	0.534659	5669	8052	16590	15168	12201	12016	14340	14918
C1_03680W	ENG1	Q5AIR7	124	Endo-1,3(4)-beta-glucanase 1 (Endo-1,3-beta-glucanase 1) (Endo-1,4-beta-glucanase 1) (EC 3.2.1.6) (Daughter specific expression protein 4) (Laminarinase)	0.422795	-0.0790817	0.273684	-0.228193	0.128743	0.942919	0.345535	0.462371	1852	2251	3085	3128	2095	2957	2998	2618
C1_03690W	C1_03690W	A0A1D8PD30	38.7	GRASP55_65 domain-containing protein	0.652702	0.666464	1.68865	1.70241	0.652126	0.798978	0.12835	0.127382	144	135	254	243	221	729	1361	335
C1_03720C	C1_03720C	A0A1D8PD32	68.8	Uncharacterized protein	-1.30784	-0.582066	0.401523	1.1273	0.0182612	0.557469	0.553076	0.0481847	2764	1772	1094	990	1751	4538	2230	2587
C1_03730C	MNS1	A0A1D8PD38	70.2	alpha-1,2-Mannosidase (EC 3.2.1.-)	1.30433	0.708275	0.469505	-0.126553	1.20494e-08	0.0118095	0.0748517	0.71586	988	1006	2996	2595	1091	1739	2669	2739
C1_03770W	SKO1	Q59VR1	62	Transcriptional regulator SKO1	0.0390882	-0.45056	0.0590526	-0.430596	0.946529	0.217573	0.878515	0.126754	2680	2219	2759	2934	2535	2601	2122	2364
C1_03780C	HMG1	A0A1D8PD39	116.4	3-hydroxy-3-methylglutaryl coenzyme A reductase (HMG-CoA reductase) (EC 1.1.1.34)	-0.341442	-0.0774228	0.27858	0.5426	0.16126	0.934132	0.251936	0.0135503	6387	5205	5574	4828	6791	7399	7325	8692
C1_03790C	FPR3	Q59VR3	47.6	FK506-binding protein 3 (EC 5.2.1.8) (Peptidyl-prolyl cis-trans isomerase) (PPIase) (Rotamase)	-0.33441	0.0488641	-0.204992	0.178282	0.0862354	0.958116	0.323264	0.418461	21001	18127	19468	15857	16770	17396	21025	21110
C1_03800W	RPP1	A0A1D8PD31	34.6	RNA-binding RNA processing protein	-2.14944	0.156571	0.0913158	2.39733	0.420207	0.997236	0.981611	0.342405	79	153	62	0	124	123	129	201
C1_03820W	PDR16	A0A1D8PD50	42.4	Phosphatidylinositol transporter	1.18035	0.297588	0.642091	-0.240669	0.0336073	0.840082	0.292881	0.756745	1260	1254	2391	3975	2164	1735	2148	3656
C1_03830C	C1_03830C	A0A1D8PD51	35.7	Exosome non-catalytic core subunit	10.2495	-0.264802	10.9112	0.396887	2.37012e-10	0.878594	1.23533e-11	0.58106	0	0	289	221	362	348	347	360
C1_03840W	C1_03840W	A0A1D8PD42	10.2	Uncharacterized protein	0.0421582	-8.1439	-2.03362	-10.2197	1	0.230642	0.740692	0.0396887	154	202	0	394	0	96	0	0
C1_03860C	BNI4	A0A1D8PD43	182.3	Bni4p	-0.604988	0.435533	0.087968	1.12849	0.0484072	0.322579	0.833378	5.29079e-05	2663	2597	2279	1665	2943	2643	4121	4957
C1_03870C	C1_03870C	A0A1D8PD58	63.2	GLOBIN domain-containing protein	-0.199164	-3.52473	0.919318	-2.40625	0.892836	4.34648e-06	0.298573	0.00172753	1830	2213	1747	2209	1362	6808	411	384
C1_03930W	C1_03930W	A0A1D8PD60	58.1	Uncharacterized protein	-0.493053	0.361791	1.20221	2.05705	0.912643	0.98085	0.692936	0.469371	228	192	356	0	707	219	564	932
C1_03940W	C1_03940W	A0A1D8PD61	18.3	Succinate dehydrogenase [ubiquinone] cytochrome b small subunit	2.0487	0.542194	2.82872	1.32221	1.6476e-19	0.0892867	9.02648e-37	2.01482e-08	907	1044	4621	4509	6463	7538	9956	14285
C1_03960C	C1_03960C	A0A1D8PD53	98	FHA domain-containing protein	-0.240577	0.763781	-0.842646	0.161713	0.639759	0.105501	0.0233517	0.761523	14293	17179	15835	14342	10480	6773	17193	18505
C1_03980W	SPC19	Q59QH6	20.4	DASH complex subunit SPC19 (Outer kinetochore protein SPC19)	-1.21977	0.753603	-2.21453	-0.241164	0.0110787	0.287582	5.56494e-07	0.718236	1499	2923	1016	1118	429	533	1010	906
C1_03990W	C1_03990W	A0A1D8PD55	34.3	AN1-type domain-containing protein	-0.0454522	0.269549	-0.606962	-0.291961	0.96361	0.761438	0.1295	0.540216	1459	1880	1957	1710	1181	1000	1768	1389
C1_04000C	KTR4	Q59QH4	56.7	Putative mannosyltransferase	-1.44379	-0.520797	-1.12473	-0.201742	5.80843e-05	0.387291	0.00236115	0.702331	1408	1978	817	599	620	967	666	628
C1_04010C	C1_04010C	A0A1D8PD74	39.1	Aldo_ket_red domain-containing protein	-0.837124	-0.514735	-0.262115	0.0602736	0.00392161	0.210681	0.453905	0.904433	5327	4824	3857	2637	3391	5286	3732	3369
C1_04020C	CSH1	Q59QH2	38.2	Csh1p	-0.0505454	-0.669778	1.45177	0.832534	0.956341	0.203219	4.61527e-05	0.033623	2604	3282	3435	3007	5356	11335	5596	6533
C1_04030W	C1_04030W	A0A1D8PD81	79.7	Aspartate--tRNA ligase	-0.70369	-1.22943	0.50724	-0.0184996	0.862062	0.853791	0.884616	1	117	138	89	88	179	185	0	188
C1_04040C	NOP9	Q59QH0	83.3	Nucleolar protein 9 (Pumilio domain-containing protein NOP9)	-0.946152	-0.693986	-0.191744	0.060422	0.0425571	0.295487	0.756443	0.94324	409	374	251	211	369	315	230	279
C1_04070C	BET4	A0A1D8PD57	44.1	Rab geranylgeranyltransferase	-3.4044	-0.142112	-1.04794	2.21435	0.132796	0.998478	0.698968	0.363374	447	451	101	0	208	230	197	276
C1_04100C	POR1	P83781	29.7	Mitochondrial outer membrane protein porin (Cytoplasmic antigenic protein 4)	0.374154	0.266181	0.889205	0.781232	0.0955865	0.430789	3.81143e-06	8.30884e-05	71511	65474	109274	92553	133348	120271	173973	192290
C1_04110W	C1_04110W	A0A1D8PD80	34.8	Lysophosphatidic acid acyltransferase	-7.94486	8.04762	-7.77643	8.21605	0.217045	0.360476	0.212967	0.193935	79	0	0	0	0	0	114	0
C1_04130W	ERB1	Q59VP7	97.3	Ribosome biogenesis protein ERB1 (Eukaryotic ribosome biogenesis protein 1)	-0.675455	0.182611	-0.342294	0.515772	0.0796209	0.863363	0.41927	0.201026	4409	4653	4009	2485	3932	3171	4972	4746
C1_04150C	C1_04150C	Q59VP4	22.4	Nudix hydrolase domain-containing protein	-11.1311	0.26857	0.0793141	11.479	7.09877e-10	0.961842	0.963226	4.16947e-10	570	153	0	0	374	401	595	515
C1_04180W	HTB2	Q59VP1	14.1	Histone H2B.2	-0.25701	-0.528502	0.97704	0.705548	0.729621	0.563258	0.0586092	0.208418	36340	43546	42228	33745	101361	51702	50266	80738
C1_04200C	C1_04200C	A0A1D8PD79	30.5	Nucleoporin	-0.650849	-0.546755	0.523851	0.627945	0.420524	0.688915	0.505464	0.425139	1137	784	772	623	721	2194	1005	1271
C1_04210C	CDC3	A0A1D8PD83	49	Septin	0.16452	-0.229048	0.172319	-0.22125	0.466382	0.429301	0.410657	0.282195	11046	9441	12936	13062	11125	12170	11711	11928
C1_04230W	C1_04230W	A0A1D8PDB0	31.4	Proteasome regulatory particle lid subunit	0.0176619	0.517466	-0.757502	-0.257698	0.991949	0.17853	0.00623242	0.458093	3782	3681	3962	4557	1836	2673	4152	3413
C1_04260W	HHT21	Q59VN2	15.4	Histone H3.1/H3.2	0.267757	-0.521379	0.747165	-0.0419704	0.452887	0.177462	0.00744908	0.934891	5083	6780	8349	7807	7594	12842	7927	8684
C1_04290C	ACS2	Q8NJN3	73.8	Acetyl-coenzyme A synthetase 2 (EC 6.2.1.1) (Acetate--CoA ligase 2) (Acyl-activating enzyme 2)	0.155246	0.246302	0.195469	0.286524	0.485537	0.364213	0.326768	0.128169	50041	41929	64457	52170	46099	61129	72711	77279
C1_04300C	SSA2	P46587	70	Heat shock protein SSA2	0.0508865	-0.476319	-0.71638	-1.24359	0.888631	0.0357205	7.84702e-05	1.51887e-12	386990	438109	488794	477968	200385	313803	219046	213226
C1_04310C	GIG1	Q59VM7	30.1	N-acetylglucosamine-induced protein 1 (GlcNAc-Induced Gene)	0.433337	0.411389	-0.602159	-0.624107	0.706608	0.856448	0.536584	0.536818	557	603	966	813	154	659	663	553
C1_04340C	C1_04340C	A0A1D8PDB8	36.8	Uncharacterized protein	-0.041933	-1.57907	1.35509	-0.182047	1	0.948771	0.862155	0.990717	84	0	0	89	200	0	86	0
C1_04360C	C1_04360C	A0A1D8PD97	9.6	Uncharacterized protein	0.780073	-0.807623	-0.128532	-1.71623	0.0726226	0.132174	0.824321	8.39832e-06	3309	3819	6924	6912	2105	4671	2408	2048
C1_04370C	C1_04370C	Q59KY7	22.4	Mitochondrial 37S ribosomal protein RSM18	4.33483	0.406196	0.563519	-3.36511	2.48428e-09	0.863363	0.578341	7.89794e-06	84	276	4917	3327	228	310	563	272
C1_04380W	SIT4	Q59KY8	35.9	Serine/threonine-protein phosphatase SIT4 (EC 3.1.3.16)	-2.15661	-0.150405	-1.53057	0.47563	0.154981	0.988123	0.322651	0.814429	1531	109	254	171	250	334	406	211
C1_04390C	NOP4	A0A1D8PD99	84.1	mRNA-binding ribosome biosynthesis protein	1.58978	1.22698	0.0684303	-0.294367	0.00741002	0.109058	0.942944	0.724597	784	649	2652	2254	385	1200	2028	2196
C1_04400C	APE2	Q59KZ1	104.3	Aminopeptidase 2 (EC 3.4.11.-)	-0.308012	-0.085704	-0.175146	0.0471618	0.186303	0.911572	0.48052	0.888435	28673	26955	27115	23904	19356	31217	27888	27787
C1_04410C	ESS1	Q59KZ2	19.8	Peptidyl-prolyl cis-trans isomerase (EC 5.2.1.8)	0.181118	-0.284167	0.0944865	-0.370798	0.0790054	0.00785611	0.403212	5.46805e-05	12060	12664	16119	15611	12343	14332	12649	13340
C1_04420C	URA6	Q59KZ3	30.8	Uridylate kinase (UK) (EC 2.7.4.14) (ATP:UMP phosphotransferase) (Deoxycytidylate kinase) (CK) (dCMP kinase) (Uridine monophosphate kinase) (UMP kinase) (UMPK)	-0.0183424	0.0782062	-0.281013	-0.184464	0.99008	0.94899	0.368744	0.601759	2701	2820	3557	2654	1794	2864	2739	3014
C1_04430C	C1_04430C	A0A1D8PDA0	27.4	Sepiapterin reductase family protein	-1.12582	1.11755	-1.78071	0.462656	0.621478	0.787761	0.353968	0.859671	616	13215	315	6459	992	3206	6485	3820
C1_04450C	FMA1	A0A1D8PDA4	27.4	Fma1p	0.635307	1.80497	-1.67384	-0.504186	0.00041812	1.02456e-26	4.87724e-24	0.00762246	22371	23587	42303	38618	7482	6922	30612	29687
C1_04460C	C1_04460C	Q59RC4	28.8	Uncharacterized protein	12.0309	0.0677086	13.1757	1.21248	7.97171e-15	0.973629	1.26875e-17	0.000369689	0	0	991	762	1361	2126	2083	2195
C1_04490W	C1_04490W	A0A1D8PDB1	42.1	SHNi-TPR domain-containing protein	-0.88773	-0.1695	-0.501312	0.216918	3.74318e-06	0.706874	0.015266	0.382784	41234	49210	26089	29003	31663	32479	34886	33113
C1_04500W	ICL1	Q59RB8	61.4	Isocitrate lyase	0.391827	0.626421	-0.288918	-0.0543239	0.624798	0.554466	0.711973	0.966639	1237	1893	3235	1487	1494	1028	2434	2292
C1_04520C	PHO85	A0A1D8PDA6	38.1	Cyclin-dependent serine/threonine-protein kinase	1.32823	-0.852879	0.987299	-1.19381	0.00813659	0.231589	0.0577452	0.0199068	21539	21890	55059	67660	22186	68522	28866	28263
C1_04550W	ELC1	Q59RB3	11.4	Elongin C	-0.161986	-0.929679	-0.285692	-1.05338	0.840268	0.153024	0.650637	0.0353976	1134	1146	1211	1100	599	1347	653	522
C1_04580C	C1_04580C	Q59RB0	31.6	Uncharacterized protein	5.59215	0.106667	8.9394	3.45391	0.00246582	1	2.42565e-07	0.0618455	6	0	231	106	2640	112	1557	2294
C1_04590W	C1_04590W	A0A1D8PDB6	6.8	Uncharacterized protein	0.639366	0.159005	-0.921212	-1.40157	0.207715	0.936808	0.0457818	0.0013785	490	460	702	960	226	283	293	380
C1_04600C	C1_04600C	A0A1D8PDC7	39.2	Uncharacterized protein	0.115743	0.203308	-0.874923	-0.787357	0.822433	0.797054	0.00388816	0.0120551	10410	14845	17314	13755	7111	6638	10507	8424
C1_04610W	ATP1	A0A1D8PDC4	58.9	ATP synthase subunit alpha	0.306701	0.49999	-0.23682	-0.0435313	0.315527	0.143748	0.436572	0.92347	201528	245829	312310	312863	141213	249399	314025	328964
C1_04620W	C1_04620W	A0A1D8PDC2	65.2	Uncharacterized protein	-2.49894	-0.526568	-1.67603	0.296352	6.77527e-16	0.313187	1.45259e-07	0.497932	12545	9650	1976	2450	3292	3733	2380	3426
C1_04630C	C1_04630C	A0A1D8PDD2	130.6	Phospholipid-transporting ATPase (EC 7.6.2.1)	-0.828936	-1.21307	-0.558599	-0.942731	0.895757	0.932343	0.915042	0.859032	134	135	72	98	0	202	93	0
C1_04640W	C1_04640W	A0A1D8PDD7	73.3	Triacylglycerol lipase	-0.309274	-0.167952	-0.230593	-0.0892713	0.704084	0.946596	0.767857	0.928783	381	314	239	389	290	307	310	323
C1_04660W	DUR1,2	A0A1D8PDC6	200.3	Bifunctional urea carboxylase/allophanate hydrolase	-2.08045	-1.00271	0.522545	1.60028	0.0339022	0.563731	0.674855	0.11846	1945	1872	747	297	4240	962	1388	1901
C1_04670W	HAT1	Q59VF4	48.3	Histone acetyltransferase type B catalytic subunit (EC 2.3.1.48)	-0.15474	-0.0243625	-0.490278	-0.3599	0.535431	0.982804	0.00962298	0.0763491	42274	51274	48810	46272	33969	32679	38819	39590
C1_04680W	PIL1	A0A1D8PDD1	34.5	Lipid-binding protein	-0.530214	0.00250806	0.0893776	0.622099	4.5667e-20	1	0.217306	1.16962e-26	97886	100568	80475	75235	95262	118823	124053	129529
C1_04710C	RSA3	Q59VF9	21.9	Ribosome assembly protein 3	0.666654	0.506947	-1.4277	-1.58741	0.431666	0.752941	0.0406995	0.0223117	362	427	713	703	143	152	350	146
C1_04730C	LYS21	Q59VG1	47.5	Homocitrate synthase	-0.389652	0.219882	0.365553	0.975087	0.315527	0.787761	0.328451	0.00248369	3611	2624	2933	2485	4161	3895	4944	6315
C1_04740W	LPG20	A0A1D8PDE2	39.9	Aldo-keto reductase superfamily protein	0.720373	-0.943144	3.34142	1.6779	0.839667	0.899256	0.148174	0.539745	0	129	94	141	416	927	553	247
C1_04750W	IFE1	A0A1D8PDC5	43.1	Putative dehydrogenase	0.525001	0.349548	1.3531	1.17765	0.751944	0.942919	0.274003	0.364938	254	370	544	473	1301	193	1245	1183
C1_04770C	ERG3	Q59VG6	45.4	C-5 sterol desaturase	9.66386	-0.831776	11.3541	0.858476	1.47713e-07	0.723338	3.72019e-10	0.525928	0	0	194	146	201	823	374	273
C1_04780C	C1_04780C	A0A1D8PDD9	100.1	Protein kinase domain-containing protein	-0.526873	-0.255853	0.123836	0.394856	0.0356179	0.563731	0.69974	0.133274	8899	6709	6638	5688	7918	9314	9060	8029
C1_04790W	C1_04790W	Q59VH0	24.1	Nuclear cap-binding protein subunit 2 (20 kDa nuclear cap-binding protein)	0.351066	0.597949	0.968755	1.21564	0.586747	0.452912	0.0517978	0.0129286	1821	3091	4679	2496	5281	4241	8292	9105
C1_04830W	SEC21	A0A1D8PDE3	104.2	Coatomer subunit gamma	0.538545	0.056948	1.26802	0.786426	0.16126	0.978763	8.34197e-05	0.0247677	3228	2898	5277	4820	5121	10165	9822	8569
C1_04880C	MRPL37	Q59VH8	13.8	Mitochondrial 54S ribosomal protein YmL37	1.7543	-1.78445	2.88745	-0.651301	0.72288	0.85006	0.472428	0.909442	0	99	208	167	0	800	147	104
C1_04890W	YBN5	A0A1D8PDE8	44.3	Obg-like ATPase 1	-0.0251004	0.472314	-0.277609	0.219805	0.988973	0.403274	0.521902	0.641846	45871	42872	57153	42311	43387	28781	61668	60113
C1_04900W	MNN15	Q59VL7	89.6	Putative alpha-1,3-mannosyltransferase MNN15 (EC 2.4.1.-)	0.204281	0.438971	-0.583821	-0.349131	0.855025	0.787761	0.453247	0.698653	531	650	754	782	520	245	634	645
C1_04910C	C1_04910C	A0A1D8PDG0	36.7	Methyltransf_11 domain-containing protein	-0.538343	-0.0907915	0.226845	0.674397	0.396392	0.976138	0.746429	0.246155	275	194	203	165	288	262	314	305
C1_04970W	CLU1	Q59MA9	155.7	Clustered mitochondria protein homolog (Protein TIF31 homolog)	0.618409	0.229287	-0.191777	-0.580899	1.24527e-07	0.193072	0.16729	1.23147e-06	50243	55298	90591	92506	42527	50952	61341	68540
C1_04980C	C1_04980C	A0A1D8PDG5	57.3	Uncharacterized protein	0.780171	0.185169	2.44135	1.84635	0.451425	0.967989	0.00226331	0.0294583	2711	4127	10075	3508	26432	9149	16381	34382
C1_04990C	C1_04990C	A0A1D8PDF7	43.3	Uncharacterized protein	3.7128	0.902896	4.76525	1.95534	3.55667e-07	0.511735	2.56503e-11	0.0146455	260	190	3805	2928	9337	2322	12059	15478
C1_05010C	C1_05010C	A0A1D8PDF5	37.9	PAQR-type receptor	0.87417	3.32269	-1.31341	1.13511	0.530236	0.0041889	0.27734	0.374078	2295	3896	6705	6120	1095	1428	2270	27905
C1_05030C	PSF2	Q59MA3	23.4	DNA replication complex GINS protein PSF2	-2.76144	-0.387913	1.03807	3.4116	0.235847	0.973629	0.698422	0.11846	308	157	82	0	484	478	263	621
C1_05050C	RRP6	A0A1D8PDF4	90.5	Exosome nuclease subunit	0.84809	0.168078	0.506303	-0.173709	0.0624169	0.919452	0.300241	0.785425	2512	2740	6787	4042	4374	2982	4893	5153
C1_05060W	REI1	A0A1D8PDH5	44.8	Rei1p	-0.367546	-0.910806	0.493606	-0.0496549	0.341669	0.0116215	0.155144	0.931781	1084	1215	1085	937	1306	2005	880	1187
C1_05070C	GPI7	Q8TGB2	100.7	GPI ethanolamine phosphate transferase 2 (EC 2.-.-.-) (Glycosylphosphatidylinositol-anchor biosynthesis protein 7)	-0.0292513	0.466409	-1.39352	-0.897857	0.998437	0.757326	0.0302938	0.204752	238	284	341	242	75	129	122	208
C1_05090W	TRY2	Q59LX5	42	Transcriptional regulator of yeast form adherence 2	-0.0554105	-0.527871	-0.582019	-1.05448	0.920837	0.165702	0.042179	8.58318e-05	1980	2181	2342	2193	1476	1297	1177	1132
C1_05100W	C1_05100W	A0A1D8PDG2	31.1	Uncharacterized protein	0.00106023	-0.608583	-0.788301	-1.39794	1	0.462083	0.136024	0.00444424	346	294	412	318	184	189	168	123
C1_05110C	ARO4	P79023	40.3	Phospho-2-dehydro-3-deoxyheptonate aldolase, tyrosine-inhibited (EC 2.5.1.54) (3-deoxy-D-arabino-heptulosonate 7-phosphate synthase) (DAHP synthase) (Phospho-2-keto-3-deoxyheptonate aldolase)	0.0485304	0.0311465	-0.351533	-0.368917	0.904134	0.981527	0.120974	0.104751	25955	25256	30488	29493	15912	25248	25846	23287
C1_05140W	BRG1	Q59LY1	45.5	Biofilm regulator 1	10.3462	2.68087	9.11868	1.45335	1.75324e-08	0.0343981	9.26643e-07	0.232129	0	0	263	278	64	149	369	1216
C1_05160C	C1_05160C	A0A1D8PDH0	44.8	Uncharacterized protein	-0.930619	0.194963	-0.555659	0.569924	9.02766e-07	0.622424	0.00589022	0.00562355	14878	16961	8928	9905	9127	12952	14115	15607
C1_05170C	CUE5	A0A1D8PDI5	48	Ubiquitin-binding protein	0.066055	0.0824524	-0.182577	-0.166179	0.785089	0.846241	0.290718	0.358635	18995	20991	23573	23746	16579	18989	20485	24264
C1_05180C	C1_05180C	A0A1D8PDI3	9.1	Uncharacterized protein	0.995705	1.09032	-0.279173	-0.184559	0.000133528	8.72875e-05	0.38495	0.609513	3044	2945	7308	6259	1959	3101	7019	5558
C1_05210C	C1_05210C	A0A1D8PDG9	44.2	Uncharacterized protein	-0.288864	0.671345	-0.418119	0.54209	0.652204	0.335238	0.442251	0.309259	544	375	479	379	291	412	725	589
C1_05230W	C1_05230W	Q5A298	22.7	DNA-directed RNA polymerase III subunit	-7.83082	-0.652926	1.72512	8.90301	0.0272827	0.96862	0.662798	0.0108296	73	0	0	0	105	144	73	114
C1_05240C	RPT1	Q5A2A0	49.8	Proteasome regulatory particle base subunit	0.217047	0.145958	0.304686	0.233597	0.363834	0.751847	0.151641	0.306344	9977	10064	13329	13039	12812	11957	15708	17145
C1_05270C	MHR1	Q5A2A2	28.3	Mitochondrial homologous recombination protein 1	-0.573091	0.231011	-0.466562	0.337539	0.014539	0.59342	0.0512906	0.193935	3282	2796	2482	2161	2214	2206	3122	3072
C1_05280W	C1_05280W	A0A1D8PDJ2	65.2	Uncharacterized protein	-2.58168	1.22608	-3.68471	0.123046	0.284045	0.82308	0.0887298	0.982135	641	910	131	160	0	133	152	186
C1_05290W	GRS1	Q5A2A5	73.7	Glycine--tRNA ligase	0.13577	-0.0143949	-0.632657	-0.782822	0.547746	0.995538	0.000105195	1.40808e-06	57335	55820	68155	72310	30867	43584	44575	42021
C1_05300C	PRD1	Q5A2A7	81.7	Metalloendopeptidase	-4.67919e-05	0.527275	-0.782971	-0.255649	1	0.129952	0.00236187	0.429549	8503	12057	10814	12318	5630	6410	10274	10324
C1_05360C	C1_05360C	Q5A2B2	68.9	Non-canonical poly(A) polymerase	1.27476	0.0125772	1.72314	0.460951	0.689408	1	0.524811	0.901479	62	0	108	66	75	139	147	103
C1_05390C	C1_05390C	A0A1D8PDK0	79.4	Uncharacterized protein	-5.5821	1.30888	-7.43013	-0.539147	2.77038e-10	0.420813	4.28375e-17	0.692183	5578	5243	36	211	21	44	107	79
C1_05410C	TRP99	A0A1D8PDN3	20.1	Peroxiredoxin (EC 1.11.1.15)	0.0163451	-0.125511	-0.214825	-0.356681	0.979467	0.784162	0.306195	0.0670578	20259	20361	25400	21286	14780	20920	20712	17701
C1_05420W	C1_05420W	Q5A2B8	21.2	Uncharacterized protein	0.0762956	0.551004	0.732814	1.20752	0.969572	0.714277	0.353272	0.0985221	428	524	838	322	794	792	975	1813
C1_05430W	SPT20	Q5A2B9	83.9	Transcription factor SPT20	0.106719	0.401452	-0.672045	-0.377312	0.974298	0.932206	0.633196	0.818102	59	282	217	196	127	82	169	167
C1_05490C	C1_05490C	Q5A2C6	27.2	MICOS complex subunit	9.9964	0	0	-10.258	0.10357	1	1	0.0883209	0	0	232	195	0	0	0	0
C1_05500W	RSM22	Q5A2C7	87.3	Mitochondrial 37S ribosomal protein RSM22	0.047013	1.33079	0.309051	1.59283	0.972047	0.00696138	0.586442	0.000217221	941	699	944	975	1169	845	2752	3396
C1_05510C	RPS27A	A0A1D8PDP4	9.1	40S ribosomal protein S27	0.356375	0.772701	-1.1275	-0.711172	0.318849	0.027389	7.10937e-05	0.020187	2317	2328	3086	3615	1030	1112	1858	2506
C1_05530C	SSH1	A0A1D8PDL0	55.3	Ssh1p	-13.9876	-0.695504	2.06646	15.3585	1.59451e-16	0.714299	0.016774	3.58405e-19	2950	2317	0	0	16649	4396	9881	6421
C1_05560W	RIB4	A0A1D8PDK6	23.1	6,7-dimethyl-8-ribityllumazine synthase (DMRL synthase) (EC 2.5.1.78)	3.29863	0.655659	4.42609	1.78312	0.107241	0.937011	0.0188708	0.437335	107	0	734	485	1412	877	2052	2352
C1_05630C	C1_05630C	A0A1D8PDL7	122.1	Uncharacterized protein	-1.72454	-1.1168	-0.137088	0.470652	2.36291e-33	2.31119e-13	0.489167	0.00410383	27995	29148	10482	9143	22008	30968	13072	15684
C1_05640C	FAL1	Q5A9Z6	45.5	ATP-dependent RNA helicase FAL1 (EC 3.6.4.13)	-1.03548	-0.182722	-0.824393	0.0283673	0.473637	0.979901	0.561086	0.99608	248	88	140	51	59	140	121	80
C1_05650W	C1_05650W	Q5A9Z7	28.5	Putative uridine kinase	-0.0754141	-0.80068	0.823619	0.0983528	0.948024	0.280219	0.131784	0.91011	181	146	169	182	275	310	226	172
C1_05660C	C1_05660C	A0A1D8PDK7	161.6	Uncharacterized protein	-0.226474	-0.30762	0.322617	0.24147	0.416966	0.374452	0.185457	0.362538	1018	940	1051	853	1169	1303	1181	1192
C1_05670W	C1_05670W	Q5AA00	47.4	Peptide hydrolase (EC 3.4.-.-)	0.804788	0.424804	-0.312424	-0.692408	0.00957527	0.385404	0.389119	0.0299518	2220	2401	4249	4849	1623	2160	3447	2524
C1_05680C	RIM1	Q5AA01	16.2	Rim1p	2.76882	-0.835793	2.28353	-1.32108	2.69374e-06	0.414479	0.00015039	0.0458267	452	235	2612	2702	963	2555	1047	1211
C1_05700W	ATG8	P0C075	15.6	Autophagy-related protein 8 (Autophagy-related ubiquitin-like modifier ATG8)	-0.65078	-0.400662	1.67739	1.92751	0.941358	0.990588	0.767373	0.736246	978	0	752	0	1730	1422	1315	1566
C1_05720W	C1_05720W	A0A1D8PDL6	27.4	Ribosomal 60S subunit protein L7A	0.975056	0.0441145	1.32914	0.398203	6.70591e-09	0.967436	6.21632e-16	0.0375119	65443	58985	146718	130984	147809	168103	213066	172974
C1_05770C	PRC3	A0A1D8PDM9	61.9	Carboxypeptidase (EC 3.4.16.-)	-0.0582584	0.131313	0.657294	0.846865	0.895757	0.834851	0.00378591	0.000146485	1366	1703	1736	1601	2270	2614	3377	2963
C1_05780W	C1_05780W	Q5AA11	71.8	RFX-type winged-helix domain-containing protein	2.94728	1.11113	1.90554	0.0693857	0.000427788	0.433445	0.0314943	0.974285	145	346	3416	970	1110	688	2671	2058
C1_05800C	C1_05800C	Q5AA12	26.3	Rtf2 domain-containing protein	1.11795	-0.644513	1.06752	-0.694936	0.146173	0.628749	0.152021	0.404626	262	786	1176	1371	907	1322	790	885
C1_05810W	GIM5	Q5AA13	17.7	Gim5p	0.107999	0.0764107	-0.722506	-0.754094	0.847165	0.967989	0.0329074	0.0277198	2453	2616	3056	3119	1112	2057	2015	1864
C1_05820C	RAD10	Q5AA15	37.2	Rad10p	7.84372	0.885552	6.78948	-0.168682	0.194723	0.977429	0.257763	0.990717	0	0	0	91	0	45	49	41
C1_05860W	PRN2	Q5AA21	37.8	Prn2p	-0.982634	-0.521519	-0.509088	-0.0479734	0.240965	0.765774	0.578429	0.97919	1418	927	702	647	1138	458	714	665
C1_05880W	PRN4	Q5AA23	37	Prn4p	-0.655478	-0.589997	-0.0265437	0.0389376	4.44194e-07	2.82472e-05	0.902964	0.860822	7374	7306	5450	5112	6387	8253	5983	5488
C1_05890W	C1_05890W	A0A1D8PDR3	37	Uncharacterized protein	-0.460537	-0.615523	-0.0655816	-0.220567	0.510776	0.515328	0.939986	0.783721	1096	858	877	739	574	1377	802	659
C1_05900W	C1_05900W	A0A1D8PDN5	104.7	Uncharacterized protein	-1.88017	-0.0667971	-0.568844	1.24453	4.82795e-27	0.937513	0.00267292	1.12048e-11	1416	1436	441	436	886	1060	1079	1122
C1_05930C	C1_05930C	A0A1D8PDN2	126.9	Glutamine amidotransferase subunit	-1.143	-0.842669	0.485746	0.786076	0.146218	0.479671	0.586229	0.345898	1208	1320	518	764	830	2914	1275	1087
C1_05960W	PGA45	Q5AA33	49	Predicted GPI-anchored protein 45	0.533561	-0.617886	-0.425783	-1.57723	0.169352	0.197124	0.276183	1.17505e-06	3014	4518	6131	6170	2799	2817	2461	1899
C1_05990C	C1_05990C	Q5AA38	40.1	Uncharacterized protein	-1.68546	-0.594717	0.735412	1.82615	0.0804183	0.789137	0.498444	0.0524242	466	281	221	51	584	677	474	517
C1_06020W	RGD1	A0A1D8PDP3	74.8	Rgd1p	-0.282438	0.236064	-0.550206	-0.0317044	0.414543	0.684847	0.0544559	0.954078	2748	3883	3174	2990	2255	2284	3142	3239
C1_06030C	C1_06030C	Q5AA42	27.7	Uncharacterized protein	0.489326	2.90548	-4.28168	-1.86553	0.888431	0.290549	0.0221518	0.405392	505	637	802	999	54	0	250	277
C1_06050C	C1_06050C	A0A1D8PDP8	8.7	Ubiquinol--cytochrome-c reductase subunit 10	0.688093	1.51362	-1.32252	-0.496993	0.169352	0.00144984	0.00243863	0.345779	1011	606	1563	1402	281	379	1206	1011
C1_06060C	ACP1	A0A1D8PDT0	16.1	Acyl carrier protein	0.393895	1.24227	-1.10092	-0.252548	0.416948	0.00331335	0.00417536	0.622997	460	502	796	641	232	217	708	561
C1_06070W	C1_06070W	Q5AA46	20.1	Putative mitochondrial 37S ribosomal protein MRPS12	-0.349787	-0.784935	-0.354904	-0.790051	0.779084	0.59239	0.74275	0.407593	4968	4922	4954	3881	3461	4388	896	4541
C1_06080C	ARC35	Q5AA47	40.5	Arp2/3 complex 34 kDa subunit	0.189135	-0.184184	-0.760645	-1.13396	0.69763	0.845851	0.0258542	0.00054599	1982	1460	2294	2161	809	1277	1062	1086
C1_06100C	MSI3	Q96VB9	78.5	Heat shock protein homolog SSE1 (Chaperone protein MSI3)	-0.0738043	0.104309	-0.347979	-0.169866	0.81241	0.840082	0.0770409	0.465233	61884	63914	69566	65820	39843	61340	66706	60537
C1_06110C	NPL4	Q5AA50	67.3	Nuclear protein localization protein 4	-0.19205	-0.0474209	0.545281	0.68991	0.844255	0.996091	0.429143	0.310345	1557	1681	1736	1482	3162	1418	2628	2854
C1_06130C	HAC1	A0A1D8PDR2	41.5	Transcription factor	1.64123	0.192923	2.1898	0.741492	0.561392	0.99363	0.382474	0.818102	74	0	148	118	104	253	283	184
C1_06280C	UME6	Q59MD2	91.7	Transcriptional regulatory protein UME6	9.43994	1.30986	8.91951	0.789433	6.64455e-08	0.316562	3.88039e-07	0.461858	0	0	165	126	99	78	212	319
C1_06320W	C1_06320W	A0A1D8PDU5	88.6	Uncharacterized protein	3.15015	-0.752516	4.00183	0.0991678	5.85403e-07	0.532192	9.22511e-11	0.935923	125	214	1992	1430	3663	1578	2008	1841
C1_06380C	C1_06380C	Q5AAN8	11.8	Uncharacterized protein	-3.39058	-2.29254	-1.70975	-0.611706	0.530236	0.840082	0.767857	0.934891	332	567	0	92	0	303	66	0
C1_06390W	C1_06390W	A0A1D8PDR9	29.4	Ubiquitin carboxyl-terminal hydrolase (EC 3.4.19.12)	-0.139127	-0.225336	0.322863	0.236654	0.822433	0.815066	0.469654	0.632623	8526	8768	9154	8636	12986	8290	10996	11184
C1_06400C	C1_06400C	A0A1D8PDS6	79.8	Uncharacterized protein	-10.7542	-1.12984	1.18203	10.8063	1.632e-09	0.508482	0.288213	2.66248e-09	161	403	0	0	356	979	353	344
C1_06410W	C1_06410W	A0A1D8PDT1	99.2	Uncharacterized protein	-1.05388	-0.149992	0.238038	1.14193	0.301575	0.977429	0.847383	0.244334	348	282	227	122	165	624	364	441
C1_06420C	C1_06420C	A0A1D8PDT2	80.9	Uncharacterized protein	0.950397	0.696699	-0.44784	-0.701538	0.803189	0.94771	0.902318	0.847663	0	207	216	230	82	67	179	111
C1_06450C	RPS14B	A0A1D8PDT3	14	Ribosomal 40S subunit protein S14B	-0.382545	-0.220538	-0.612825	-0.450819	0.112118	0.589606	0.0044659	0.0504664	78711	66067	64968	61019	49216	45590	50360	47101
C1_06460C	RPS22A	Q96W54	14.8	40S ribosomal protein S22-A	0.567538	-0.949752	1.08993	-0.427354	0.451379	0.279082	0.0830855	0.582283	7626	8550	15866	11459	7480	29057	10389	10974
C1_06480C	C1_06480C	A0A1D8PDT9	19.4	PRA1 family protein	0.129534	0.190309	0.582337	0.643112	0.870927	0.904636	0.240396	0.195875	2360	1997	2624	2767	2386	4351	5532	3367
C1_06530C	C1_06530C	A0A1D8PDT6	157.5	Putative ubiquitin-specific protease	-1.12134	-0.993719	-1.61931	-1.49169	0.281896	0.527259	0.0826459	0.121057	2841	2560	921	1843	858	913	849	200
C1_06550W	GLT1	A0A1D8PDU9	235.2	Glutamate synthase (NADH)	-0.113976	-0.00387929	0.254321	0.364418	0.178516	1	0.000377058	1.94654e-07	23615	24894	26295	24492	26078	32584	34372	34785
C1_06560W	C1_06560W	A0A1D8PDU0	49.9	LisH domain-containing protein	-2.9022	8.21369	-10.2491	0.866837	0.42361	0.0387074	0.0016332	0.847777	227	217	0	64	0	0	61	69
C1_06570W	ANT1	Q5AAQ7	38.7	Ant1p	-0.274744	-0.256095	-0.0881259	-0.069477	0.788292	0.918566	0.931118	0.957735	283	292	315	227	337	193	267	276
C1_06580W	RPS23A	A0A1D8PDU3	16	Ribosomal 40S subunit protein S23B	0.364486	-0.922611	0.303892	-0.983205	0.60377	0.197598	0.653737	0.0731911	4425	5022	6080	7592	3175	9067	3497	3878
C1_06590C	IWS1	Q5AAR0	45.8	Transcription factor IWS1	0.0827779	-0.00772932	-0.344351	-0.434859	0.900803	1	0.401255	0.282195	4115	3617	4896	4401	3439	2603	3208	4073
C1_06600W	C1_06600W	Q5AAR2	37.8	Uncharacterized protein	0.351389	0.00429653	-0.394783	-0.741875	0.442287	1	0.345535	0.0509815	19397	18755	28396	26766	9280	20934	18160	16715
C1_06630W	C1_06630W	A0A1D8PDU2	98.1	Chromatin-binding protein	0.519029	0.0403296	-0.473799	-0.952498	0.916686	1	0.902964	0.799476	102	74	258	39	76	49	0	159
C1_06640C	C1_06640C	A0A1D8PDX1	5.4	Uncharacterized protein	-0.0102588	-0.684529	-0.127127	-0.801397	1	0.129698	0.794637	0.0228495	5536	6033	6767	6248	3646	7321	3559	4350
C1_06660W	C1_06660W	A0A1D8PDV1	64.4	IFRD domain-containing protein	0.441993	-0.301321	1.92041	1.1771	0.369205	0.741105	1.78366e-07	0.00291619	290	340	576	400	921	1526	1243	1072
C1_06720C	C1_06720C	A0A1D8PDW7	44.5	DAO domain-containing protein	-0.854678	0.325664	-0.670174	0.510168	0.0738594	0.760404	0.16927	0.33468	5493	5848	3594	3503	4434	2543	4899	5818
C1_06730W	RAC1	A0A1D8PDV5	25.8	Rho family GTPase	1.08736	0.426759	1.20631	0.545702	0.151863	0.805549	0.0909452	0.527446	4432	3974	10609	9661	14246	4319	14816	16487
C1_06740C	NOP6	Q5AAS4	24.1	Nop6p	-0.583101	0.673598	-0.466486	0.790213	0.406986	0.482217	0.494783	0.213448	2333	2734	1581	2210	2353	1220	3330	3680
C1_06760C	IPI3	Q5AB15	55.9	Pre-rRNA-processing protein IPI3	1.36157	-1.00367	2.72394	0.358707	0.0729119	0.367628	4.59638e-05	0.717864	698	2362	5076	3821	6999	13780	4369	7684
C1_06770W	C1_06770W	A0A1D8PDW2	58.1	Putative oxidoreductase	-0.791064	-0.174291	-0.802227	-0.185454	0.381576	0.967436	0.34476	0.875334	760	746	735	273	454	409	317	605
C1_06780W	NPR1	A0A1D8PDY7	90.4	Serine/threonine protein kinase	0.213056	-0.491099	0.321791	-0.382364	0.728783	0.484269	0.524387	0.451611	729	851	1350	750	844	1166	830	853
C1_06790C	MRPL19	Q5AAS9	15.1	Mitochondrial 54S ribosomal protein YmL19	-0.227986	0.0814435	-0.708794	-0.399365	0.530236	0.948771	0.0102965	0.201175	2226	2303	1933	2417	1323	1472	1753	1761
C1_06800W	RAI1	Q5AAT0	45.7	Decapping nuclease RAI1 (EC 3.6.1.-)	-0.648767	-1.28296	-0.0674927	-0.701683	0.444626	0.159567	0.949706	0.389716	841	600	520	522	417	1022	239	443
C1_06810W	CAT1	O13289	54.8	Peroxisomal catalase (EC 1.11.1.6)	-0.728528	-0.525025	1.31116	1.51466	6.31547e-09	0.000183294	1.16644e-27	1.02379e-35	13791	13919	9872	9087	28946	41205	28106	29189
C1_06820W	C1_06820W	Q5AAT3	37.3	C2H2-type domain-containing protein	-0.380265	0.339501	-0.941726	-0.22196	0.770628	0.915978	0.324406	0.866904	1026	1498	1088	1100	973	279	1067	919
C1_06880C	SPO22	A0A1D8PDX4	108	Spo22p	-9.68879	-0.400447	0.285775	9.57412	7.58224e-09	0.835063	0.774876	2.11362e-08	135	133	0	0	139	194	140	157
C1_06890C	C1_06890C	A0A1D8PDZ1	13.7	Ribosomal 60S subunit protein L34B	0.251122	-2.02793	0.832836	-1.44622	0.972978	0.704504	0.810828	0.666464	891	1983	1639	2184	0	5635	1107	379
C1_06900C	MMD1	A0A1D8PDX5	17	Isoleucine biosynthesis protein	-0.0337702	-0.198316	-1.88329	-2.04784	0.987793	0.902993	8.70798e-06	1.62353e-06	3249	3134	3673	3397	542	1261	1005	800
C1_06910C	C1_06910C	A0A1D8PDX9	101.8	CCR4-NOT core subunit	-0.864097	-0.355841	0.614433	1.12269	0.272347	0.849387	0.436417	0.121822	158	130	109	72	238	202	158	257
C1_06920C	C1_06920C	A0A1D8PDY5	50.9	Uncharacterized protein	0.0111102	-0.283196	0.440726	0.14642	1	0.937513	0.687295	0.920198	630	693	364	1106	539	1336	847	922
C1_06930W	PGA63	Q5AAU3	136.2	Protein transport protein SEC31	-0.221682	0.111909	-0.364686	-0.0310958	0.191006	0.748979	0.0144365	0.901979	24659	25620	24399	24372	16531	23280	24220	26386
C1_06960W	SUI2	Q5AAU7	33.9	Translation initiation factor eIF2 subunit alpha	0.704126	-0.299209	0.0781299	-0.925205	0.0179287	0.581858	0.85412	0.00128951	5628	4695	8827	10155	4255	6945	5376	5251
C1_06970C	C1_06970C	A0A1D8PDZ2	62.9	Uncharacterized protein	7.9846	-0.536419	11.3743	2.85332	0.0104639	0.971659	0.000102337	0.35596	0	0	111	0	482	500	313	497
C1_07000W	MEF2	Q5AAV3	90.2	Ribosome-releasing factor 2, mitochondrial (RRF2mt) (Elongation factor G 2, mitochondrial) (EF-G2mt) (mEF-G 2)	0.453199	0.462636	0.754598	0.764036	0.74515	0.865364	0.498616	0.509652	579	369	720	751	1224	301	1284	1367
C1_07070C	DHH1	Q5AAW3	62.1	ATP-dependent RNA helicase DHH1 (EC 3.6.4.13)	-0.518122	-0.126245	-0.123212	0.268665	0.0455981	0.862861	0.71149	0.363374	8146	8131	6761	6130	5847	9491	7282	9161
C1_07090C	C1_07090C	Q5AAW5	84.4	Exonuclease domain-containing protein	-0.780365	-0.980919	0.0608906	-0.139662	0.284056	0.28129	0.950767	0.890935	384	405	275	246	378	455	338	159
C1_07110W	TAF145	A0A1D8PE08	144.4	Taf145p	-0.31458	0.218061	0.438594	0.971235	0.530236	0.832861	0.31299	0.0114617	221	221	199	203	299	303	393	443
C1_07120W	GAP4	Q59WB3	66.4	S-adenosylmethionine permease GAP4 (SAM permease) (Amino-acid permease GAP4)	0.234899	0.154976	0.660159	0.580235	0.42004	0.789	0.00370609	0.0138592	3105	4103	4769	4809	4849	6739	7648	7526
C1_07140C	RIA1	Q59WB7	117.8	GTPase	-0.387783	0.371079	1.05564	1.8145	0.612504	0.792862	0.0719736	0.000938732	3869	4110	3835	3099	10945	5162	9725	16077
C1_07150W	C1_07150W	A0A1D8PDZ4	9.1	Uncharacterized protein	0.768596	-0.316153	0.714965	-0.369784	0.00459184	0.507715	0.00828742	0.232842	1494	1928	3250	3331	2790	2845	2881	2513
C1_07180W	CCS1	Q59WC0	26.5	Copper chaperone	0.292546	0.266001	-0.19919	-0.225736	0.426889	0.652603	0.593906	0.550626	17929	16759	23229	24780	15920	14271	17854	25842
C1_07200W	YMC1	Q59WC2	32.8	Organic acid transporter	-0.602593	-0.442619	-1.07086	-0.910881	0.236356	0.595006	0.0157004	0.050256	1108	690	728	621	380	492	352	406
C1_07230W	PHO15	Q59WC5	34.2	4-nitrophenylphosphatase (PNPPase) (EC 3.1.3.41)	-0.581834	-1.04927	-0.797922	-1.26536	0.330705	0.10661	0.139549	0.0136625	566	372	367	345	252	295	134	180
C1_07240W	YPD1	Q59WC6	20.6	Phosphorelay intermediate protein YPD1	0.22345	0.936453	-0.982177	-0.269174	0.849231	0.396502	0.199212	0.793141	649	929	971	1102	540	232	896	933
C1_07270W	SEC34	Q59WC9	96.4	Golgi transport complex subunit	-1.91261	-9.86663	-0.783234	-8.73726	0.128653	7.05981e-07	0.586229	6.0616e-06	132	364	83	66	97	200	0	0
C1_07280C	TFB5	P0C0X3	7.8	General transcription and DNA repair factor IIH subunit TFB5 (TFIIH subunit TFB5) (RNA polymerase II transcription factor B subunit 5)	2.64752	0.114053	1.78236	-0.751107	1.23017e-06	0.973629	0.00190316	0.263474	163	162	1350	973	379	780	515	942
C1_07340W	C1_07340W	A0A1D8PE13	118.6	Chromatin-remodeling ATPase	1.56602	0.0895262	1.90679	0.430299	7.27812e-15	0.91869	9.86453e-22	0.0701925	1850	1579	5707	5787	5306	7848	8124	8295
C1_07350C	GPX3	Q59WD3	19.8	Glutathione peroxidase-like peroxiredoxin GPX3 (EC 1.11.1.15) (Glutathione peroxidase homolog 3) (GPx 3)	0.113157	-0.371788	1.72783	1.24288	0.997985	0.978763	0.532749	0.689727	0	177	109	105	246	344	177	362
C1_07360W	STU1	Q59WD5	147.2	Protein STU1	-0.0315901	-0.190615	-0.620493	-0.779518	0.940965	0.607471	0.000969451	2.74583e-05	113423	126127	140040	125653	81743	73826	79586	84036
C1_07390W	C1_07390W	Q59WE0	62.5	UBX domain-containing protein	-0.610098	-0.336238	0.556048	0.829909	3.45619e-05	0.0877801	0.000177749	1.1338e-08	13861	15067	10823	10618	21065	21662	20630	19719
C1_07410C	SKP1	Q59WE2	19	SCF ubiquitin ligase subunit	0.240932	-0.432117	0.546785	-0.126264	0.315023	0.0881318	0.00574992	0.638518	13894	16092	20275	19802	22632	21163	18822	20080
C1_07440W	C1_07440W	A0A1D8PE20	119.2	VASt domain-containing protein	0.608053	-1.76061	0.935065	-1.4336	0.573542	0.0862326	0.316157	0.101669	1692	1458	2541	2879	964	5508	1059	1074
C1_07470C	C1_07470C	Q59PU5	75.4	Double-stranded DNA-dependent ATPase	7.3997	-0.295486	9.38599	1.69081	0.0407302	0.990828	0.00592696	0.685738	0	0	74	0	173	64	101	140
C1_07490C	C1_07490C	A0A1D8PE62	74.6	DNA polymerase alpha subunit B	0.455434	-0.357002	0.987173	0.174737	0.536992	0.805549	0.0995213	0.841578	845	834	1637	1000	2106	1147	1603	1511
C1_07500C	LHP1	A0A1D8PE36	37.6	Lhp1p	-0.463365	0.152203	-0.934235	-0.318666	0.00111644	0.573181	1.38621e-12	0.0359945	23730	26364	20592	20491	12112	14397	18357	16513
C1_07510W	C1_07510W	A0A1D8PE30	31.3	Pyridoxal phosphate homeostasis protein (PLP homeostasis protein)	1.04975	-1.81087	0.830541	-2.03008	0.0388301	0.000376927	0.110937	1.37585e-05	257	266	531	686	349	608	149	169
C1_07520C	IST2	A0A1D8PE41	107	Ist2p	-0.112556	0.0691386	0.504155	0.685849	0.548671	0.876843	0.000220587	3.42294e-07	7205	7091	7501	7463	9883	10534	12382	13131
C1_07540C	BBC1	A0A1D8PE54	104.5	Bbc1p	-0.61848	0.0617148	0.358584	1.03878	0.0312457	0.967989	0.250559	9.9251e-05	3275	2802	2085	2383	3256	4707	4441	5331
C1_07590C	C1_07590C	A0A1D8PE70	117.6	AP-2 complex subunit alpha	-2.52799	0.869506	-1.46262	1.93488	0.341686	0.919452	0.601651	0.481768	166	80	51	0	55	33	110	86
C1_07600W	ATP7	Q59PV8	19.4	ATP synthase subunit d, mitochondrial	0.49473	-0.120871	-0.604035	-1.21964	0.0182612	0.828815	0.00266165	1.47594e-10	69565	85931	142809	106573	44334	59635	59347	53183
C1_07630W	C1_07630W	Q59PW1	19.4	Monothiol glutaredoxin	0.493045	-0.642	0.0731935	-1.06185	0.0491204	0.0186044	0.830294	2.36651e-06	12031	12267	19264	19413	9748	16536	9479	10166
C1_07680W	HAP2	A0A1D8PE35	41	Hap2p	0.0934564	0.192087	0.0921747	0.190805	0.855188	0.800155	0.828928	0.632188	1188	1086	1399	1350	1279	1144	1548	1777
C1_07690C	C1_07690C	A0A1D8PE78	119.1	Importin-alpha export receptor	-0.207142	-0.175536	0.733736	0.765342	0.68929	0.873919	0.0459994	0.0396887	1594	1239	1685	1124	2032	2773	2167	2852
C1_07700C	VRG4	Q5A477	41.2	GDP-mannose transporter (GMT)	1.55906	0.304469	2.47777	1.22317	0.100344	0.937011	0.00370163	0.21292	340	231	1638	336	1309	1951	1795	2943
C1_07710C	ADE4	A0A1D8PE37	59.9	Amidophosphoribosyltransferase (ATase) (EC 2.4.2.14) (Glutamine phosphoribosylpyrophosphate amidotransferase)	-1.05082	-0.259956	2.04535	2.83621	0.023444	0.834822	1.0513e-06	9.46739e-12	6196	5567	4667	1901	22179	27045	21059	27685
C1_07800W	MTO1	Q5A7B1	77.4	tRNA modification protein	1.56021	0.0236184	1.75133	0.214739	0.593428	1	0.508311	0.964131	101	0	178	164	142	210	199	221
C1_07840W	C1_07840W	A0A1D8PE45	32.4	Nicotinate-nucleotide pyrophosphorylase [carboxylating] (EC 2.4.2.19) (Quinolinate phosphoribosyltransferase [decarboxylating])	-0.246205	-0.256473	0.331371	0.321103	0.796304	0.902993	0.669832	0.693817	3479	1803	3132	1985	2037	4929	3335	3362
C1_07870C	SMI1	A0A1D8PE53	68.8	Smi1p	-0.407602	0.0257546	0.304477	0.737833	0.268951	0.996029	0.412052	0.0223104	1874	1369	1517	1267	2013	2016	2294	2608
C1_07880C	GCS1	A0A1D8PE63	88.4	Glutamate--cysteine ligase	-3.44003	-0.812926	-1.9616	0.665505	0.148032	0.924083	0.435658	0.839857	604	462	0	106	119	160	96	91
C1_07890C	ADE5	A0A1D8PE67	85.9	Bifunctional aminoimidazole ribotide synthase/glycinamide ribotide synthase	-2.22811	-0.591857	-1.2419	0.394352	2.96562e-13	0.216339	0.00011382	0.326111	17588	15221	3944	3984	4823	9552	5860	5173
C1_07900W	COI1	Q5A799	21.3	Coi1p	0.192679	-0.0714506	0.0359532	-0.228177	0.665569	0.967989	0.942944	0.576427	19853	19641	29457	21991	23149	16923	22273	23949
C1_07910C	MRPL3	Q5A798	45	Mitochondrial 54S ribosomal protein YmL3	0.580147	0.614803	-0.169267	-0.134611	0.131551	0.202499	0.714982	0.793141	3210	3432	7191	4190	2445	3587	5938	4884
C1_07950C	C1_07950C	Q5A796	31	Uncharacterized protein	1.98086	-0.913471	0.605815	-2.28852	0.00108308	0.338946	0.411281	0.000144316	1487	1248	5796	6401	2209	1950	1930	703
C1_07970C	IRE1	A0A1D8PE76	139.2	Bifunctional endoribonuclease/protein kinase	0.673735	0.247024	-0.139859	-0.566569	0.482065	0.942859	0.905597	0.555777	113	165	276	227	74	189	150	209
C1_08010W	DPM1	A0A1D8PEA2	26.9	Dolichol-phosphate mannosyltransferase subunit 1 (EC 2.4.1.83)	1.1829	-1.26188	0.711617	-1.73316	0.397729	0.526136	0.622893	0.164431	541	4300	5553	6698	1347	7060	1931	1993
C1_08020W	UBA2	A0A1D8PE77	70.9	Ubiquitin-activating enzyme E1-like	0.224847	-0.344126	-0.642498	-1.21147	0.507738	0.420592	0.0144298	9.07857e-07	4393	6039	6977	6797	3225	3495	3378	2913
C1_08030W	PFY1	Q5A786	13.8	Profilin	1.20966	0.564397	-0.433313	-1.07858	4.42886e-07	0.0845511	0.120165	1.20791e-05	10057	12428	34925	24365	7213	9710	16184	13248
C1_08050W	C1_08050W	Q5A785	18.9	Uncharacterized protein	3.96554	-0.307653	2.89256	-1.38063	3.07367e-59	0.528001	1.61459e-31	7.01643e-08	314	277	6154	4388	1826	2659	2017	2240
C1_08060W	OFR1	Q5A784	15.4	Ofr1p	0.849166	0.598784	-0.170954	-0.421336	1.98992e-05	0.0124351	0.509441	0.0595222	9953	12348	23010	22409	8114	12112	18500	17395
C1_08080C	C1_08080C	A0A1D8PE69	15.4	Uncharacterized protein	0.227812	0.29069	0.0959899	0.158868	0.74916	0.81148	0.893004	0.822277	9700	10114	15795	10707	13476	7195	14461	16617
C1_08090C	FUN12	Q5A782	113	Translation initiation factor eIF5B	-0.137699	-0.0700163	0.166162	0.233845	0.27077	0.797054	0.151641	0.0344347	18635	19028	20808	18057	19796	22909	24912	23317
C1_08100W	DRG1	Q5A779	40.3	GTP-binding protein	3.24081	0.741045	1.86043	-0.639338	2.10928e-43	0.0154703	1.27871e-14	0.020187	3705	3128	42074	31614	12328	12634	28150	21513
C1_08110W	C1_08110W	A0A1D8PEA9	120.5	TOG domain-containing protein	3.36384	0.406759	2.69161	-0.265473	4.97474e-149	0.016721	2.55361e-95	0.0971263	3100	2754	37992	30613	17796	20440	30267	29872
C1_08120W	BUD6	A0A1D8PE85	79.2	Bud6p	0	0.36084	9.86161	10.4022	1	0.96748	4.17142e-06	1.5942e-06	0	0	0	0	214	121	258	269
C1_08140W	C1_08140W	A0A1D8PE88	37.4	CMP/dCMP-type deaminase domain-containing protein	3.99908	-4.36989	4.10831	-4.26066	0.603784	0.73625	0.56293	0.560891	0	0	7	0	0	7	0	0
C1_08160W	C1_08160W	A0A1D8PEB6	40.6	Uncharacterized protein	-0.657118	0.212287	-0.0449071	0.824497	0.0132695	0.71382	0.912622	0.00139008	2903	2548	2071	1854	2785	2498	3619	3727
C1_08170C	BUL1	Q5A768	84.7	Bul1p	-1.68354	21.4279	-23.7138	-0.60235	0.669832	1.78306e-12	2.92952e-16	0.897434	874	726	290	275	0	0	0	400
C1_08180C	C1_08180C	A0A1D8PE79	148.3	Oxysterol-binding protein related protein	0.130664	0.188458	-0.257718	-0.199924	0.742789	0.765774	0.403664	0.553138	11222	8841	12077	12776	8708	8108	11109	11861
C1_08210C	MLT1	Q5A762	180.6	Multiple drug resistance-associated protein-like transporter 1 (MRP-like transporter 1) (Vacuolar multi-drug resistance ABC transporter MTL1)	0.0512723	0.138161	-0.672372	-0.585484	0.982231	0.967989	0.345067	0.43973	29518	30294	35956	34236	27000	9000	25097	24395
C1_08220W	CCR4	Q5A761	90.3	Glucose-repressible alcohol dehydrogenase transcriptional effector (EC 3.1.13.4) (Carbon catabolite repressor protein 4) (Cytoplasmic deadenylase)	-0.526647	-0.425823	0.478493	0.579318	0.0746104	0.294359	0.100004	0.0438304	784	730	631	562	866	1291	949	934
C1_08230C	PLB5	A0A1D8PEB1	81.4	Lysophospholipase (EC 3.1.1.5)	0.64913	-0.852931	1.40243	-0.0996333	0.518173	0.53273	0.0835119	0.945669	180	426	591	484	439	1234	551	506
C1_08260C	LTP1	A0A1D8PE91	19.2	Tyrosine protein phosphatase	-1.76681	-0.237057	-0.561431	0.968321	9.03235e-07	0.814494	0.187555	0.0145159	3086	3244	1264	860	1503	2933	2257	2102
C1_08270C	MED15	A0A1D8PEC5	128.2	Med15p	-2.44803	-0.299118	-2.4814	-0.332482	2.31813e-19	0.61302	8.52643e-20	0.36849	5443	5182	1349	878	778	1168	937	917
C1_08290C	DIP2	Q5A756	110.1	SnoRNA-binding rRNA-processing protein	-0.465713	-0.123114	-0.383895	-0.041297	0.466834	0.967436	0.536996	0.974179	853	761	880	464	585	665	793	566
C1_08300W	NOT5	A0A1D8PE87	74.7	CCR4-NOT core subunit	0.0782485	-0.197776	-0.347033	-0.623057	0.888378	0.788298	0.300251	0.0424281	6821	9415	9432	9897	5219	7807	7293	6001
C1_08310W	OPY2	Q5A753	56.8	Opy2p	1.22575	1.10387	-0.904075	-1.02595	0.710938	0.876012	0.777614	0.752908	28	52	86	123	0	47	78	31
C1_08320W	TKL1	Q5A750	73.7	Transketolase (EC 2.2.1.1)	-0.188203	0.240895	0.135911	0.565009	0.0899863	0.0518046	0.236092	2.96738e-09	57565	56472	62759	51083	58268	68473	87062	90516
C1_08330C	ADH2	O94038	36.8	Alcohol dehydrogenase 2 (EC 1.1.1.1)	1.7788	-0.822854	2.48521	-0.116438	4.67641e-34	4.36081e-07	4.0139e-66	0.594522	8425	8676	34777	31752	38894	59071	31852	33043
C1_08340C	SNX3	Q5A748	18.4	Sorting nexin-3	-0.342285	-0.212384	-0.413897	-0.283996	0.685208	0.932343	0.575694	0.731823	356	441	320	387	294	307	215	406
C1_08360C	OLE1	Q5A747	55.3	Acyl-CoA desaturase (EC 1.14.19.1)	0.394453	0.361406	-0.350078	-0.383125	0.00129649	0.0109829	0.00479156	0.00211002	10312	10865	16101	15416	7490	9354	13322	12239
C1_08380W	TEF2	Q59QD6	50	Elongation factor 1-alpha 2 (EF-1-alpha 2)	0.409584	-0.187663	0.624841	0.0275936	2.21644e-05	0.184436	1.67013e-11	0.86578	623106	657902	960979	963296	908887	1090092	1052386	1025610
C1_08400C	GCV2	A0A1D8PE97	109.8	Glycine cleavage system P protein (EC 1.4.4.2)	0.212255	0.30821	-0.904606	-0.808651	0.61052	0.586956	0.00232671	0.00871254	72648	68281	100787	84809	43140	31369	58708	52985
C1_08410C	SAM4	A0A1D8PEB0	34.3	S-adenosylmethionine-homocysteine S-methyltransferase	2.22922	-0.517001	3.35196	0.605739	8.96999e-16	0.208228	2.52351e-35	0.0507456	120	153	837	620	1292	1524	1136	1197
C1_08420W	GCR3	A0A1D8PEB4	103.1	Gcr3p	1.2988	0.0924361	1.34759	0.141222	0.0102067	0.975023	0.00661132	0.859032	1363	1097	4023	2891	3919	2217	4271	3733
C1_08450C	CDC42	P0CY33	21.2	Cell division control protein 42 homolog	-1.38623	-0.0122984	-0.873572	0.500363	0.00279437	1	0.0761378	0.379768	421	335	178	151	218	195	250	241
C1_08470W	CBP4	Q59QC6	17.1	Assembly factor CBP4 (Cytochrome b mRNA-processing protein 4)	0.343854	0.113521	0.398455	0.168122	0.266148	0.904636	0.167212	0.632623	1447	1299	1976	1970	1489	2213	2486	2207
C1_08480C	APS3	Q59QC5	19.7	Clathrin-associated protein AP-3 complex component APS3	0.58758	0.105538	1.15794	0.675902	0.535431	0.981527	0.138463	0.447754	188	394	555	436	826	436	814	854
C1_08490W	BNA5	Q59QC4	52.4	Kynureninase (EC 3.7.1.3) (Biosynthesis of nicotinic acid protein 5) (L-kynurenine hydrolase)	0.600586	-0.348637	0.265748	-0.683475	0.287711	0.760995	0.674855	0.206206	1307	1109	1980	2160	901	2131	1348	1390
C1_08500C	ENO1	P30575	47.2	Enolase 1 (EC 4.2.1.11) (2-phospho-D-glycerate hydro-lyase) (2-phosphoglycerate dehydratase)	-0.192127	0.0932706	-0.274701	0.0106962	0.355982	0.845993	0.137567	0.981228	374129	383733	374996	375364	254520	386449	398931	402117
C1_08510W	EAF6	Q59QC2	23.2	Chromatin modification-related protein EAF6	-1.04327	0.753983	-2.37392	-0.576665	0.500588	0.808168	0.0569491	0.734138	590	322	308	200	20	171	212	144
C1_08520C	C1_08520C	Q59QC1	17.2	Mitochondrial 54S ribosomal protein YmL28	0.277235	-0.363156	-0.0120085	-0.652399	0.284056	0.255601	0.976038	0.00286246	8053	8609	12459	10476	8718	7776	7581	7816
C1_08540C	C1_08540C	Q59QB9	79.3	Non-specific serine/threonine protein kinase (EC 2.7.11.1)	-0.557058	-0.0581434	-0.356595	0.142319	0.0182553	0.964905	0.157254	0.648828	6063	5064	4719	3889	4061	4735	5442	4562
C1_08550C	GCF1	Q59QB8	28.5	Gcf1p	-1.61887	-0.0222164	-1.87297	-0.276319	7.76582e-07	1	6.93545e-09	0.543343	16712	16393	7011	5273	3114	6249	5849	4805
C1_08560W	TCP1	Q59QB7	60	Chaperonin-containing T-complex alpha subunit	-0.409886	-0.115356	-0.388445	-0.0939149	0.159636	0.897674	0.169005	0.809795	9005	10707	7830	8884	7837	7205	7948	8710
C1_08580C	VCX1	Q59QB4	44.5	Vacuolar calcium ion transporter	-0.885316	-0.207348	0.0404084	0.718377	0.00272633	0.776612	0.932647	0.0193409	862	851	608	449	793	994	988	839
C1_08590C	ERG1	Q92206	55.3	Squalene monooxygenase (EC 1.14.14.17) (Squalene epoxidase) (SE)	-0.484529	0.172244	0.379999	1.03677	0.517592	0.947072	0.602696	0.0920107	2414	1812	2008	1444	3555	1815	4235	3191
C1_08600C	GCD6	P87163	81.9	Translation initiation factor eIF-2B subunit epsilon (GCD complex subunit GCD6) (Guanine nucleotide exchange factor subunit GCD6) (eIF-2B GDP-GTP exchange factor subunit epsilon)	-0.323615	-0.338391	0.103542	0.0887665	0.746595	0.862031	0.91961	0.94324	1939	1667	2441	900	1278	2751	1485	2203
C1_08640W	RTG1	Q5APP3	30.4	Rtg1p	0.703345	-0.78115	0.919622	-0.564873	0.612504	0.737896	0.448412	0.687793	187	239	334	444	126	738	224	339
C1_08650C	FAD1	A0A1D8PED9	32.8	FMN adenylyltransferase	-0.353063	-1.88177	1.59205	0.0633376	0.841253	0.197124	0.164933	0.982135	175	62	114	98	349	375	176	56
C1_08670W	SWI6	A0A1D8PED2	82.4	Transcriptional regulator	0.290393	0.854531	0.252371	0.816509	0.273176	0.000224403	0.333113	0.000172637	2055	2126	3336	2490	2505	2493	5223	5575
C1_08680C	C1_08680C	A0A1D8PEF8	22.4	Frequenin	-1.2596	-0.934321	0.522273	0.847548	0.0820481	0.371124	0.524165	0.277045	283	211	140	96	220	521	219	227
C1_08690W	C1_08690W	A0A1D8PEE2	18.3	Succinate dehydrogenase assembly factor 2, mitochondrial (SDH assembly factor 2) (SDHAF2)	0.133443	0.186955	0.0485108	0.102023	0.862757	0.908714	0.945399	0.887377	3205	5260	6803	3820	4643	4064	6143	5760
C1_08700W	C1_08700W	A0A1D8PEE1	154.9	ANK_REP_REGION domain-containing protein	-0.732879	-0.630921	-0.748392	-0.646434	0.462091	0.718892	0.420518	0.520183	316	357	231	227	95	328	151	159
C1_08740C	SEC24	Q5AQ76	102	Protein transport protein SEC24	0.313589	0.114721	0.634042	0.435174	0.131559	0.814196	0.000396912	0.0234089	7257	7307	11605	9003	10290	12612	13018	16369
C1_08750W	YMC2	A0A1D8PED5	32.9	Ymc2p	0.83447	-0.41131	3.85813	2.61235	0.37387	0.846241	3.33701e-08	0.000403734	192	131	335	319	2936	1659	3042	1161
C1_08770W	C1_08770W	A0A1D8PEE6	38.3	Uncharacterized protein	-0.113082	-0.697622	2.07944	1.4949	0.953332	0.681675	0.0101102	0.0857828	326	130	349	141	905	1054	566	871
C1_08780W	C1_08780W	Q5APN0	60.7	Alkaline phosphatase (EC 3.1.3.1)	-0.0711129	0.588253	1.79851	2.45788	1	0.976747	0.683472	0.567726	78	0	0	81	54	239	67	434
C1_08790W	TPO3	A0A1D8PEG8	65	Spermine transporter	13.0051	0.280152	8.91193	-3.81301	0.00146948	0.997457	0.0380559	0.415044	0	0	1395	1996	0	196	254	0
C1_08810C	MSS116	Q5APM7	76.7	ATP-dependent RNA helicase MSS116, mitochondrial (EC 3.6.4.13)	-0.291619	-0.0114907	-0.456196	-0.176068	0.534537	1	0.260517	0.728811	1301	1007	975	1153	835	859	1032	971
C1_08870C	JIP5	Q5AQ62	60.7	WD repeat-containing protein JIP5	-0.846495	0.456393	-0.986729	0.316159	0.39623	0.835063	0.279281	0.791701	1100	794	981	250	488	472	702	876
C1_08900W	C1_08900W	A0A1D8PEG9	62.5	Uncharacterized protein	0	0.0140128	9.81164	10.0054	1	1	4.90533e-06	4.38053e-06	0	0	0	0	185	143	173	228
C1_08920W	RSM25	Q5AQ57	34.2	37S ribosomal protein S25, mitochondrial	0.253894	-0.338232	0.542032	-0.0500945	0.341788	0.306461	0.0144525	0.890623	3889	3389	4712	5096	5178	5499	4742	5324
C1_08930C	C1_08930C	A0A1D8PEJ9	8.6	Uncharacterized protein	-1.38989	0	-6.39933	-5.2596	0.89277	1	0.322689	0.451177	8	23	14	0	0	0	0	0
C1_08940C	MSN4	A0A1D8PEH3	82.5	Stress-responsive transcriptional activator	-0.410279	0.105353	-0.505049	0.0105837	0.612504	0.976747	0.4819	1	248	511	318	325	230	312	332	355
C1_08950W	PFK26	A0A1D8PEF9	128.4	Pfk26p	-0.237295	0.349201	-0.774633	-0.188138	0.740483	0.753826	0.128548	0.788705	935	1360	968	1217	485	896	947	1099
C1_08980C	ZWF1	A0A1D8PEG2	58.3	Glucose-6-phosphate 1-dehydrogenase (EC 1.1.1.49)	0.10838	-0.218102	0.121273	-0.205208	0.650948	0.433445	0.572668	0.302099	24537	28821	33479	31624	29121	29074	28786	30997
C1_08990C	KEX2	A0A1D8PEG3	104.8	Kexin	0.311048	0.785182	-0.211249	0.262885	0.491627	0.0712598	0.645385	0.562637	1158	1445	1547	2075	993	1288	2138	2506
C1_09020W	C1_09020W	A0A1D8PEH4	27.8	Uncharacterized protein	0.384542	0.17628	-0.250208	-0.45847	0.0773037	0.678052	0.278508	0.0285069	3481	4102	5331	5832	2858	3604	4154	4478
C1_09030C	COX5	Q5APK5	18.6	Cytochrome c oxidase subunit Va	0.780282	0.0638659	0.347375	-0.369042	1.37591e-29	0.71382	2.10846e-06	5.92255e-07	33635	32529	68120	60837	39209	45930	51302	54240
C1_09070W	PAN2	Q5APK0	136.4	PAN2-PAN3 deadenylation complex catalytic subunit PAN2 (EC 3.1.13.4) (PAB1P-dependent poly(A)-specific ribonuclease) (Poly(A)-nuclease deadenylation complex subunit 2) (PAN deadenylation complex subunit 2)	-0.819538	-1.4902	0.299377	-0.371284	0.837567	0.812088	0.938979	0.931781	0	317	115	87	191	196	92	72
C1_09140C	SHO1	Q5AQ36	41	High osmolarity signaling protein SHO1 (Osmosensor SHO1)	0.973982	0.400941	0.316302	-0.256739	0.0109973	0.565432	0.495571	0.607815	341	532	990	947	501	596	820	897
C1_09190C	DAK2	A0A1D8PEI2	64.9	Dihydroxyacetone kinase	0.47111	0.0453809	0.655714	0.229985	0.0369521	0.971392	0.00189676	0.377604	5064	5573	9133	7615	6639	10531	10494	10219
C1_09230C	GRP1	A0A1D8PEJ8	37.8	Grp1p	-0.327085	-0.682085	0.832329	0.477328	0.477714	0.155558	0.0208211	0.243917	289	365	327	265	490	696	428	441
C1_09290C	ARG5,6	A0A1D8PEI6	95	Bifunctional acetylglutamate kinase/N-acetyl-gamma-glutamyl-phosphate reductase	2.23737	0.103746	2.38414	0.25052	0.000146206	0.978763	4.28762e-05	0.785425	4532	3814	23496	21194	31157	10735	25708	30552
C1_09320C	C1_09320C	A0A1D8PEK5	61.4	Uncharacterized protein	-0.153711	-1.39645	-1.14229	-2.38503	0.912643	0.151416	0.140276	0.000710627	563	629	622	591	365	158	114	132
C1_09330W	C1_09330W	Q5APH1	23.3	Uncharacterized protein	-0.928662	0.374062	-0.99791	0.304814	0.00178375	0.462083	0.000648051	0.410272	4998	4069	3198	2246	2356	2193	3553	3509
C1_09340C	C1_09340C	A0A1D8PEK0	135	Uncharacterized protein	-10.0412	-0.570704	0.0353029	9.50577	4.68822e-09	0.773381	0.981611	5.88482e-08	178	164	0	0	121	242	142	141
C1_09350W	CAF20	Q5AQ12	20	Cap-associated protein CAF20	0.0188355	0.131148	0.0747367	0.187049	0.998819	0.943097	0.910817	0.761771	35842	46244	46823	47097	54115	30318	53389	60022
C1_09360C	EFR3	Q5APG7	107.7	Protein EFR3	-1.49657	-0.393251	-1.03702	0.066301	0.121687	0.896436	0.298573	0.975283	507	177	149	128	147	194	190	115
C1_09370W	CEF1	Q5APG6	70.1	Pre-mRNA-splicing factor CEF1	-0.701358	-0.359468	-0.543942	-0.202051	0.131264	0.687294	0.247037	0.735022	259	288	208	174	181	197	187	163
C1_09380W	RIM20	Q9UW12	90.7	pH-response regulator protein palA/RIM20	0.55289	-1.52867	2.26002	0.178462	0.940965	0.896436	0.602541	0.985117	0	143	136	100	0	748	201	78
C1_09430W	C1_09430W	A0A1D8PEK8	97.5	Uncharacterized protein	0.482074	2.10204	-1.6921	-0.0721382	0.799906	0.197979	0.191133	0.981597	141	424	370	510	24	163	481	412
C1_09440W	C1_09440W	Q5APF8	36.5	Inorganic diphosphatase	0.354185	-0.242911	0.099027	-0.49807	0.523539	0.834822	0.875059	0.317849	1325	1794	2387	2128	1877	1429	1928	1442
C1_09450C	NUP188	A0A1D8PEL3	185.9	Nup188p	-1.64754	0.249814	0.0874845	1.98484	0.564887	0.987408	0.982522	0.460134	134	113	94	0	106	163	171	204
C1_09460W	ERG12	A0A1D8PEL1	47	Mevalonate kinase (MK) (EC 2.7.1.36)	0.156004	0.123349	0.310286	0.277631	0.768293	0.932343	0.440778	0.520183	2928	1970	3650	2593	2711	3471	3756	4201
C1_09470C	C1_09470C	Q5APF5	35.8	Sidoreflexin	0.920349	0.15912	0.0456137	-0.715615	0.000441951	0.830431	0.915042	0.00940512	1553	2128	4245	3651	1667	2187	2709	2361
C1_09490C	GUA1	Q5APF2	58.8	GMP synthase [glutamine-hydrolyzing] (EC 6.3.5.2) (GMP synthetase) (Glutamine amidotransferase)	-1.96731	-0.109182	-1.3666	0.491527	4.11865e-27	0.855676	2.12954e-13	0.0212699	11405	9471	3178	2884	3448	4814	4288	4727
C1_09510W	YTM1	Q5APF0	51.7	Ribosome biogenesis protein YTM1	0.879249	0.293163	-0.0629601	-0.649046	0.147059	0.846771	0.942944	0.303781	2243	2090	5421	3688	1147	3209	3384	2701
C1_09520C	C1_09520C	Q5APE9	51.3	N2227 domain-containing protein	0.558545	0.0536607	0.67976	0.174875	0.765978	1	0.669832	0.936007	520	56	654	332	477	457	513	649
C1_09530W	RAM2	A0A1D8PEN1	36.6	Bifunctional protein farnesyltransferase/protein geranylgeranyltransferase	-0.0890157	0.188896	0.341907	0.619818	0.972047	0.967989	0.773796	0.570926	175	125	247	81	184	200	217	305
C1_09580C	LIP1	A0A1D8PER6	50.8	Lip1p	-1.0525	-0.238875	-1.92964	-1.11602	0.848965	0.997457	0.650637	0.820353	313	397	207	181	171	0	0	192
C1_09620C	C1_09620C	Q5APE0	17.9	Uncharacterized protein	0.0155318	-0.0349248	-0.542204	-0.59266	0.998437	0.988123	0.109706	0.0801548	4056	5422	5524	5306	2410	4284	3788	3814
C1_09630W	IDH1	A0A1D8PEM5	39.2	Isocitrate dehydrogenase [NAD] subunit, mitochondrial	-0.48119	-1.39961	0.753262	-0.165155	0.588838	0.0964941	0.322651	0.876809	94831	101997	75783	83287	59121	295677	80132	70392
C1_09640W	ADE12	P0CH96	47.9	Adenylosuccinate synthetase (AMPSase) (AdSS) (EC 6.3.4.4) (IMP--aspartate ligase)	-0.59052	-0.374954	0.0957853	0.311352	0.000261995	0.0740274	0.667515	0.0847045	17555	14595	12796	11456	15188	19764	15774	16027
C1_09660W	DOA1	A0A1D8PEM3	84.3	Doa1p	-0.314204	0.240956	0.139693	0.694853	0.251256	0.580388	0.650637	0.00299047	3826	4198	3289	3974	3924	5048	5954	6571
C1_09670C	C1_09670C	Q5APD5	12.3	Uncharacterized protein	1.02292	-0.141813	1.19194	0.0272036	0.000786609	0.896301	5.9647e-05	0.972082	1809	1356	3420	3848	3552	3737	3510	4374
C1_09680W	MTS1	Q5APD4	58.7	Sphingolipid C9-methyltransferase (C-9-MT) (EC 2.1.1.317) (Cyclopropane fatty acyl phospholipid synthase homolog 1) (Methyltransferase for sphingolipid 1)	0.952892	-0.229423	0.192451	-0.989865	3.34027e-05	0.628749	0.521097	2.02515e-05	12945	12898	29315	27381	11038	19377	14691	15518
C1_09690W	MLS1	Q5APD2	62.5	Malate synthase (EC 2.3.3.9)	-0.0352753	-0.154602	-0.195729	-0.315056	0.916945	0.652603	0.317101	0.0843438	33549	36900	41055	36886	25126	37749	33732	32451
C1_09710C	C1_09710C	Q5APD0	59.6	WD_REPEATS_REGION domain-containing protein	-3.59484	0.0122265	-3.5591	0.047967	1.80192e-182	0.995766	9.49366e-179	0.832371	22649	23600	2351	1996	1901	2052	2219	2528
C1_09720W	URA9	Q874I4	48.4	Dihydroorotate dehydrogenase (quinone), mitochondrial (DHOD) (DHODase) (DHOdehase) (EC 1.3.5.2) (Dihydroorotate oxidase)	-0.358944	0.441532	0.128465	0.928941	0.41277	0.440044	0.795958	0.00847759	3043	3074	2438	2933	2498	4388	4739	6168
C1_09750W	GET2	P0CB63	33.6	Golgi to ER traffic protein 2	-0.241316	0.231582	-0.456002	0.0168956	0.471738	0.673662	0.104064	0.980668	3023	3898	3532	3103	2604	2438	3604	3484
C1_09760C	SHY1	Q5APC5	41.2	SURF1-like protein	-6.60674	1.43784	-4.37506	3.66952	0.000333405	0.748989	0.0240046	0.072022	8059	10247	0	202	605	246	1100	1771
C1_09790C	C1_09790C	Q5APC1	42.8	TRAMP complex RNA-binding subunit	-0.832316	0.234796	-0.22928	0.837833	0.075281	0.848945	0.692816	0.0707872	1728	1224	1183	720	1131	1430	1494	2075
C1_09810W	C1_09810W	Q5APB9	45.4	OBG-type G domain-containing protein	-0.676904	0.667434	0.5442	1.88854	0.420742	0.593471	0.505464	0.00494428	771	654	646	377	1390	628	1866	2098
C1_09830W	SKI3	Q5APB7	159.1	SKI complex subunit tetratricopeptide repeat protein	1.35754	-0.112679	1.54133	0.0711134	0.284255	0.98999	0.193651	0.97919	389	756	3118	329	1335	2064	1763	1919
C1_09850C	C1_09850C	Q5APB5	70.7	Uncharacterized protein	-1.75145	-1.01795	-0.686467	0.0470307	0.0034178	0.241884	0.322689	0.974387	878	914	322	282	328	836	264	397
C1_09970C	PDC2	A0A1D8PER5	94.3	Pdc2p	0.756744	-1.41515	0.567244	-1.60465	0.475522	0.237422	0.591946	0.0707872	124	80	174	215	189	108	76	60
C1_09980C	C1_09980C	A0A1D8PEQ8	34.8	Acylglycerol lipase	-0.129311	-0.579454	0.523396	0.0732531	0.746595	0.076331	0.0544559	0.859671	1533	1720	1909	1475	2399	2281	1913	1834
C1_09990W	SAC1	A0A1D8PEV5	71.1	Phosphatidylinositol-3-phosphatase	-0.464912	-0.328434	0.92188	1.05836	0.203656	0.579453	0.00320276	0.000705234	3698	2438	2574	2474	4894	7001	5458	5673
C1_10020W	SFU1	Q5AP95	56.3	Suppressor of ferric uptake 1	-0.0315342	-1.66037	2.55251	0.923681	1	0.384011	0.0390967	0.552551	209	223	260	220	2115	256	312	654
C1_10030W	DBP3	Q5APT8	63.1	ATP-dependent RNA helicase DBP3 (EC 3.6.4.13)	-0.488481	0.0507588	0.166979	0.706219	0.19885	0.98085	0.709184	0.0422698	2256	3258	2310	2135	3308	2850	3859	3809
C1_10040W	ERO1	A0A1D8PER8	66.9	ER oxidoreductin	-2.31332	-0.00302373	-2.66022	-0.349927	3.76266e-15	1	9.17978e-20	0.378011	6344	9831	2133	1567	1230	1342	1443	1612
C1_10070C	MNN23	Q5AP90	69.6	Alpha-1,2-mannosyltransferase MNN23 (EC 2.4.1.-)	1.58665	-0.852972	2.74566	0.306031	0.117204	0.635974	0.00216901	0.827412	244	391	937	1201	623	3947	1414	1404
C1_10090C	AIM21	Q5AP87	93.1	Altered inheritance of mitochondria protein 21	0.0961017	0.295636	0.286013	0.485548	0.870008	0.652991	0.467928	0.183977	3897	2988	4137	4200	4548	3827	5667	6722
C1_10100C	NTF2	A0A1D8PES3	14.2	Ran GTPase-binding protein	1.23383	0.629176	0.598496	-0.00616104	6.26967e-06	0.0883433	0.0472469	0.998274	11850	12582	29948	34791	20505	16219	33848	34728
C1_10120C	C1_10120C	Q5AP83	31.9	Transcription initiation factor IIE subunit beta	-0.110825	0.27136	-0.0709116	0.311273	0.830787	0.673662	0.87748	0.407593	2696	1887	2662	2175	2047	2373	3325	2997
C1_10160W	MIR1	Q5AP79	32.5	Mir1p	-0.000281495	0.266723	0.634776	0.90178	1	0.601347	0.0195425	0.000624403	32580	23944	36563	27937	43705	44657	56471	70571
C1_10190W	C1_10190W	A0A1D8PET7	30.9	RRM domain-containing protein	-1.42693	1.35569	-0.787132	1.99549	0.650948	0.816028	0.802325	0.472484	173	260	0	173	112	142	377	391
C1_10210C	CLA4	Q5APR8	107.1	Serine/threonine-protein kinase CLA4 (EC 2.7.11.1)	-0.0542774	-0.00227018	0.497194	0.549201	0.892836	1	0.0191519	0.00998928	1611	1488	1812	1578	1838	2627	2646	2591
C1_10220C	TPK1	Q5AP71	46.7	Tpk1p	-1.41103	0.391638	-2.36859	-0.565921	1.21941e-10	0.276884	1.64882e-28	0.0235666	4504	4657	1929	1966	709	1107	1364	1426
C1_10230C	C1_10230C	A0A1D8PES9	164.7	Uncharacterized protein	0.389041	-2.5122	1.72102	-1.18022	0.979467	0.834822	0.781845	0.86578	0	150	106	113	0	540	101	0
C1_10240C	C1_10240C	Q5AP69	26.3	Bifunctional 4-hydroxy-4-methyl-2-oxoglutarate aldolase/oxaloacetate decarboxylase	3.00586	-1.36292	2.84252	-1.52625	6.57823e-05	0.225019	0.000169	0.0703566	260	357	1514	3958	2887	1410	1140	915
C1_10250C	C1_10250C	Q5AP68	31.2	Uncharacterized protein	0.077036	-0.281045	-0.455627	-0.813708	0.928786	0.788252	0.345067	0.0653319	1015	1532	1581	1457	704	1201	996	829
C1_10260C	RPA34	Q5AP67	27.8	DNA-directed RNA polymerase I subunit	-0.0860159	0.129531	-0.252572	-0.0370245	0.814701	0.828549	0.316684	0.923796	49875	42328	50093	48375	39682	37929	54024	47475
C1_10270C	SFH5	Q5AP66	36.6	Phosphatidylinositol transfer protein SFH5 (PITP SFH5)	0.657903	0.258989	-0.0850703	-0.483984	0.00158554	0.472103	0.778365	0.0279612	4049	5091	9234	7162	3980	4726	6437	5897
C1_10280C	FMP52	Q5AP65	24.3	Protein FMP52, mitochondrial	-0.25679	-0.224583	0.535141	0.567348	0.657816	0.845298	0.246353	0.223439	9337	14347	14909	7815	17843	16378	16220	18936
C1_10310W	C1_10310W	A0A1D8PET9	39.4	Methyltransf_11 domain-containing protein	-6.59491	-0.845666	3.36215	9.11139	0.0518356	0.942941	0.279281	0.00454589	31	0	0	0	123	209	118	97
C1_10350C	C1_10350C	A0A1D8PEU9	78.9	Uncharacterized protein	1.84865	-0.969179	2.22823	-0.589594	0.552588	0.915978	0.429143	0.876809	95	52	267	331	254	459	0	430
C1_10380C	CBK1	Q5AP53	84.4	Serine/threonine-protein kinase CBK1 (EC 2.7.11.1) (Cell wall biosynthesis kinase 1)	-0.10492	-0.348097	0.124218	-0.118958	0.746595	0.262297	0.658248	0.686893	1226	1267	1448	1187	1163	1604	1293	1265
C1_10390C	RPL42	A0A1D8PEV4	12.2	Ribosomal 60S subunit protein L42A	-0.840261	-1.35865	-0.284559	-0.802949	0.159438	0.0277804	0.685319	0.172723	26738	29694	18153	17515	11600	37251	12483	9107
C1_10440W	C1_10440W	A0A1D8PEU5	94.1	Fibronectin type-III domain-containing protein	9.56749	9.23229	0	-0.346711	4.19389e-05	0.000303398	1	0.91011	0	0	129	184	0	0	135	128
C1_10450W	GLY1	Q59NC4	41.8	Gly1p	0.188293	-0.28004	-0.230989	-0.699321	0.511626	0.438764	0.368642	0.00128582	10583	12914	14752	15463	10007	10071	10385	9339
C1_10460W	C1_10460W	A0A1D8PEV8	47.6	Uncharacterized protein	-9.67522	-0.0331868	1.86474	11.5068	0.00212895	1	0.591617	0.000215847	0	269	0	0	445	534	467	669
C1_10470W	C1_10470W	A0A1D8PEV9	37.7	Mitochondrial 37S ribosomal protein MRPS5	0.0733	-0.323523	0.00441182	-0.392412	0.899472	0.565141	0.995822	0.264961	5080	4553	6106	5404	3481	6504	4588	4676
C1_10480W	DJP1	A0A1D8PEX2	57.5	Djp1p	-0.626864	-0.18541	0.213872	0.655326	0.151222	0.880501	0.676351	0.119585	24377	32782	27858	14611	35868	30008	33363	36436
C1_10490W	LKH1	Q59NB8	71.4	Leucine aminopeptidase 2 (EC 3.4.11.-) (Epoxide hydrolase) (EC 3.3.2.10) (Leukotriene A-4 hydrolase homolog) (LTA-4 hydrolase)	-0.494311	-0.412471	0.350564	0.432405	0.16935	0.425006	0.339641	0.232129	1262	1194	1217	778	1343	1848	1361	1462
C1_10500W	C1_10500W	A0A1D8PEW7	19.9	Uncharacterized protein	-0.409154	0.284884	-0.209005	0.485032	0.205982	0.586956	0.552996	0.111969	771	792	692	642	558	823	905	1072
C1_10530W	SNL1	Q59NB3	23.5	Snl1p	0.0646703	0.392025	0.0995166	0.426872	0.841253	0.119056	0.699367	0.0326949	7245	8342	9260	9171	8483	8245	12940	13312
C1_10540C	C1_10540C	A0A1D8PEW0	58.9	Uncharacterized protein	-9.04031	-0.43437	1.26229	9.86823	8.14142e-08	0.810206	0.0886505	6.63183e-09	85	86	0	0	205	207	177	187
C1_10550C	GCA2	A0A1D8PEW1	105.6	Gca2p	9.42218	-1.27999	13.8451	3.14293	1.80511e-09	6.37005e-07	9.21834e-20	1.65763e-36	0	0	147	139	2422	3072	1346	1326
C1_10620W	CBF5	O43101	54.3	H/ACA ribonucleoprotein complex subunit CBF5 (EC 5.4.99.-) (Centromere-binding factor 5) (H/ACA snoRNP protein CBF5) (Small nucleolar RNP protein CBF5)	-0.24584	-0.00706081	-0.385518	-0.146739	0.212022	1	0.0273661	0.498532	16725	16173	15665	15727	10434	15300	14767	15289
C1_10640C	PEA2	A0A1D8PEX7	71.3	Pea2p	0.798065	0.723632	-0.124363	-0.198796	0.000140608	0.00213453	0.669832	0.466266	3577	3068	6931	6191	3085	3037	6213	5861
C1_10660W	TBP1	O43133	26.6	TATA-box-binding protein (TATA sequence-binding protein) (TBP) (TATA-binding factor) (TATA-box factor) (Transcription initiation factor TFIID TBP subunit)	-0.366311	-0.245081	-0.0644788	0.0567512	0.067589	0.422479	0.807569	0.846218	2380	2752	2492	2031	2148	2837	2462	2498
C1_10670C	RPA190	A0A1D8PEX3	186.2	DNA-directed RNA polymerase subunit (EC 2.7.7.6)	-1.1913	-0.647085	-0.476728	0.0674897	1.95063e-09	0.00754421	0.0314317	0.841619	17296	14534	9245	6672	10839	12281	8342	9200
C1_10680C	C1_10680C	A0A1D8PEY6	135.8	Tricalbin	0.365701	-0.386297	-0.107055	-0.859053	0.18359	0.278545	0.748594	0.000254491	29271	32365	44461	45289	21755	37071	27168	25255
C1_10690W	C1_10690W	Q59WE9	36.6	AB hydrolase-1 domain-containing protein	0.153133	0.268013	-0.156656	-0.041775	0.643565	0.517573	0.602389	0.920198	5273	4932	7715	5253	3941	5386	6501	6723
C1_10700C	NIT3	Q59WF0	32.9	Putative hydrolase	1.01163	1.05309	-0.620511	-0.579046	0.0803319	0.142236	0.314273	0.367743	1912	2033	4642	4367	1682	813	2937	3451
C1_10720C	MNN2	Q59WF4	69.1	Alpha-1,2-mannosyltransferase MNN2 (EC 2.4.1.-)	-3.65155	-0.374552	-4.84288	-1.56588	3.16884e-18	0.732926	3.80693e-31	0.000839969	6944	5534	509	611	262	167	189	214
C1_10730W	C1_10730W	A0A1D8PF26	71.6	Uncharacterized protein	-2.53582	-0.480722	-1.29014	0.764956	2.66106e-08	0.612811	0.00861713	0.166608	2473	1584	495	308	652	1055	784	643
C1_10740C	ASR1	A0A1D8PEZ0	37.2	Asr1p	2.28633	-0.26059	7.12609	4.57917	0.335801	0.981527	0.000140446	0.0236504	2	167	751	198	16659	5729	7684	15768
C1_10780C	HNT1	Q59WG0	17	Adenosine 5'-monophosphoramidase	-0.187477	-0.78153	0.586718	-0.00733441	0.660184	0.0265054	0.0617546	0.99613	10189	10622	12339	8524	11662	20523	9883	11939
C1_10790W	CDC48	Q59WG3	90.9	AAA family ATPase	-0.218138	0.277085	-0.368827	0.126396	0.474255	0.507027	0.155489	0.702331	123774	150528	133669	132821	113812	97654	155018	153123
C1_10800C	ALP1	Q59WG4	61.3	Alp1p	-1.32698	-1.44168	0.646888	0.532185	0.00173054	0.00169459	0.168502	0.293866	624	826	296	354	1129	1148	571	427
C1_10820C	C1_10820C	Q59WG6	55.1	Aspartyl aminopeptidase	-0.319953	0.171014	-0.413434	0.0775332	0.212011	0.740636	0.0793965	0.818328	5003	4691	4544	4260	3796	3486	4764	5068
C1_10830W	BIG1	Q59WG7	38.1	Protein BIG1	-8.33906	-7.68804	-0.732817	0	0.193263	0.387291	0.932175	1	59	46	0	0	0	70	0	0
C1_10840C	C1_10840C	A0A1D8PEZ9	54.9	DAO domain-containing protein	2.0141	-0.0210097	1.49792	-0.537188	0.466755	1	0.589191	0.876809	0	117	214	309	166	161	205	180
C1_10860C	ADA2	Q59WH0	51.1	Transcriptional adapter 2	3.67866	0.592955	4.37846	1.29276	0.00729825	0.903966	0.000930928	0.443221	256	190	3862	2672	8322	261	8751	8043
C1_10870W	RPS17B	A0A1D8PEY9	15.7	Ribosomal 40S subunit protein S17B	0.165164	-0.539183	-0.23679	-0.941138	0.420742	0.00208284	0.187873	5.42973e-10	124273	105488	156188	136585	93408	103456	83589	77332
C1_10880W	C1_10880W	A0A1D8PF14	50.2	SnoRNA-binding rRNA-processing protein	9.46984	-0.403072	11.1068	1.23389	4.79352e-08	0.876579	8.13001e-11	0.186147	0	0	210	91	439	369	350	386
C1_10890C	C1_10890C	A0A1D8PEZ3	31.2	Uncharacterized protein	0.769191	-0.598567	0.498268	-0.869489	0.0515266	0.277789	0.234375	0.024006	1508	1970	3630	3092	1925	3107	2282	1590
C1_10910C	C1_10910C	Q59WH5	55.5	Rad60-SLD domain-containing protein	0.0188704	-0.0998872	-0.861634	-0.980391	0.999002	0.967989	0.0613495	0.0319585	384	427	560	378	208	243	280	218
C1_10930C	UBA4	Q59WH7	48.8	Adenylyltransferase and sulfurtransferase UBA4 (Ubiquitin-like protein activator 4) [Includes: Adenylyltransferase UBA4 (EC 2.7.7.-); Sulfurtransferase UBA4 (EC 2.8.1.-)]	-0.711173	-0.647365	-0.406183	-0.342375	0.364902	0.588593	0.622893	0.700768	916	803	375	793	480	858	517	476
C1_10940C	ERP5	A0A1D8PF48	25.1	Erp5p	0.710439	0.466321	1.0634	0.819278	0.0159348	0.261105	0.000104419	0.00406477	341	398	662	703	674	895	1194	1364
C1_10950C	C1_10950C	Q59WI0	57.2	Serine/threonine-protein kinase RIO1 (EC 2.7.11.1)	-0.40525	-0.22763	-0.300344	-0.122723	0.24249	0.742809	0.392938	0.783411	1637	1459	1398	1256	1334	1178	1314	1261
C1_10970W	C1_10970W	A0A1D8PEZ5	77.4	NUC153 domain-containing protein	-12.182	0.590103	-2.93672	9.83535	1.05374e-14	0.488904	3.42633e-11	1.79729e-09	755	754	0	0	88	112	166	190
C1_10990C	RTG3	A0A1D8PF20	57.3	Rtg3p	1.20133	-2.35091	1.43204	-2.1202	0.824372	0.761438	0.748594	0.624329	234	0	457	174	282	368	148	0
C1_11000C	C1_11000C	Q59WI7	16.3	rRNA-processing protein CGR1	-0.555636	-0.273756	-1.32748	-1.0456	0.0355925	0.565432	1.52305e-08	1.96202e-05	1658	1689	1329	1251	666	674	704	617
C1_11010C	C1_11010C	A0A1D8PF18	46.6	Peroxin/Ferlin domain-containing protein	-1.60544	-1.09814	-0.550022	-0.0427221	0.751868	0.942859	0.915337	1	86	135	0	78	76	75	83	0
C1_11060C	RPL2	A0A1D8PF08	27.3	Ribosomal 60S subunit protein L2A	0.5946	-1.27759	1.13614	-0.736056	0.338778	0.0361023	0.0302197	0.205659	15358	16066	30002	23973	17612	55178	19464	14602
C1_11100W	ADI1	Q59WJ5	21	1,2-dihydroxy-3-keto-5-methylthiopentene dioxygenase (EC 1.13.11.54) (Acireductone dioxygenase (Fe(2+)-requiring)) (ARD) (Fe-ARD)	1.03193	-0.927681	0.991755	-0.967861	0.376965	0.607471	0.369967	0.401575	49	146	242	208	128	272	149	93
C1_11110C	C1_11110C	A0A1D8PF30	14.3	Tubulin-binding prefolding complex subunit	-3.61211	0.021289	-0.791964	2.84143	2.48145e-08	1	0.328542	2.53603e-05	3266	3817	520	153	1336	2912	2161	2821
C1_11120C	C1_11120C	Q59WJ7	38.4	Uncharacterized protein	-0.345223	-0.140621	0.0450789	0.24968	0.202487	0.826464	0.902745	0.382341	37362	38203	35100	32328	42311	35289	39742	45108
C1_11150W	C1_11150W	Q59WK1	26.4	Uncharacterized protein	1.33386	0.0687594	-0.19001	-1.45511	0.0267671	0.987032	0.820841	0.0147518	2088	2084	9182	3028	1468	2278	2366	2230
C1_11170W	WBP1	A0A1D8PF22	50.1	Dolichyl-diphosphooligosaccharide--protein glycosyltransferase subunit WBP1 (Oligosaccharyl transferase subunit WBP1)	-2.14697	-0.135335	-2.56894	-0.557309	2.02462e-72	0.616355	5.24015e-102	3.0552e-05	12441	11568	3149	2995	1916	2172	2181	2238
C1_11190W	ARL3	A0A1D8PF23	29.2	Arf family GTPase	0.734073	0.61693	0.296064	0.178921	0.284056	0.563731	0.703766	0.842318	317	688	854	1020	641	587	1186	1070
C1_11200W	C1_11200W	A0A1D8PF42	264.4	Uncharacterized protein	0.838697	-0.0888124	1.16286	0.235354	3.26364e-07	0.869608	3.57556e-13	0.246842	77488	92447	163918	178774	184446	198342	210012	218508
C1_11210C	HAP43	A0A1D8PF19	69	Hap43p	0.577212	-0.718	0.413375	-0.881837	0.545055	0.602062	0.667515	0.299875	3653	3178	6302	5290	6764	1929	3380	3254
C1_11220C	TIM50	Q59W44	54.2	Mitochondrial import inner membrane translocase subunit TIM50	-0.129092	-0.453319	0.144673	-0.179554	0.765978	0.265044	0.696777	0.630423	4536	6358	5447	5782	4940	7345	5173	5351
C1_11230W	FGR39	A0A1D8PF33	22	Fgr39p	-0.234841	-0.574005	0.950034	0.61087	0.869458	0.760404	0.29222	0.549657	107	59	100	62	137	191	102	158
C1_11280W	CWC2	Q59W50	41.2	Pre-mRNA-splicing factor CWC2	0.919191	0.141031	0.029173	-0.748987	0.0826737	0.951333	0.974061	0.170301	750	920	1750	1815	534	1239	1210	1037
C1_11310C	PSP1	A0A1D8PF34	76.3	Psp1p	-0.766528	2.39078	-1.80191	1.3554	0.00626253	3.57119e-20	2.93234e-12	2.40017e-07	942	940	639	614	279	262	1609	1787
C1_11320C	C1_11320C	A0A1D8PF49	8.4	Uncharacterized protein	-1.78493	-9.1109	-0.61107	-7.93703	0.682232	0.0229227	0.8955	0.0262591	97	163	0	81	72	101	0	0
C1_11330C	SMT3	Q59W54	11.1	SUMO family protein	0.628249	0.236932	-0.770933	-1.16225	0.0882447	0.777767	0.0258961	0.000473286	4935	7546	10045	11641	3818	3473	5060	5248
C1_11350C	TOS4	A0A1D8PF67	55.2	Tos4p	-2.10688	0.495751	-1.0646	1.53803	0.284045	0.94771	0.618634	0.457575	34	346	52	47	33	159	51	256
C1_11360W	RPL37B	A0A1D8PF45	10.1	Ribosomal protein L37	-0.348675	-1.28999	-0.255605	-1.19692	0.750003	0.195257	0.800426	0.125191	6473	9364	7514	6571	2402	11748	3558	2920
C1_11380W	NEP1	A0A1D8PF50	29.5	18S rRNA pseudouridine methyltransferase	0.0360639	0.46665	0.379588	0.810173	0.973474	0.423526	0.362049	0.0285586	2464	1930	2719	2402	3000	2722	3830	5683
C1_11400C	GIN4	Q59W62	152.9	Serine/threonine-protein kinase GIN4 (EC 2.7.11.1) (Growth inhibitory protein 4)	0.0473294	-0.0852009	0.233615	0.101084	0.978908	0.979128	0.746429	0.91011	3062	5142	5177	4421	6083	3312	5221	5650
C1_11420W	KRR1	Q59W63	42	KRR1 small subunit processome component (KRR-R motif-containing protein 1)	-0.568594	-0.106237	0.390377	0.852734	0.215429	0.960639	0.409599	0.0416264	3997	2938	3215	2140	5087	3951	4657	5499
C1_11440C	GIN1	A0A1D8PF47	141.4	Chromatin-modulating protein	-0.0160515	-0.30081	0.233571	-0.0511872	1	0.902993	0.811974	0.975743	217	396	433	259	315	415	245	457
C1_11450C	SAM2	A0A1D8PF68	42.2	S-adenosylmethionine synthase (EC 2.5.1.6)	1.86232	0.201486	1.0079	-0.652933	2.22536e-20	0.670435	1.80845e-06	0.00406842	20363	22867	90715	87159	33213	56107	61082	58623
C1_11500C	ARO7	Q59TS4	31	Chorismate mutase (EC 5.4.99.5)	-0.666676	-0.0405773	0.0097578	0.635856	0.000189497	0.96862	0.977991	0.000484139	9967	8480	7280	5948	9058	9661	10784	10886
C1_11540C	CTA3	A0A1D8PF53	140.2	Cta3p	-0.139119	-0.736819	-0.405124	-1.00282	0.70697	0.00939924	0.138463	3.35375e-05	13345	17612	15332	16363	9858	13945	9039	7727
C1_11550W	GAR1	A0A1D8PF56	19.4	H/ACA ribonucleoprotein complex subunit	0.284823	0.513425	-0.767635	-0.539034	0.268555	0.0542788	0.000252958	0.0160499	6857	6326	10084	8191	3804	3991	7235	6003
C1_11580W	C1_11580W	Q59TT2	14.8	Uncharacterized protein	0.836653	0.00811332	-0.0627709	-0.891311	1.93085e-05	1	0.834217	6.27026e-06	3322	3814	8051	6436	3448	3401	4019	4213
C1_11590W	PLD1	A0A1D8PF62	195.8	Phospholipase (EC 3.1.4.4)	-0.250809	0.0783637	0.351715	0.680888	0.445371	0.946596	0.224647	0.0097901	5975	5799	6086	5158	8175	6782	9245	9783
C1_11610C	C1_11610C	A0A1D8PFA3	56.6	AB hydrolase-1 domain-containing protein	0.164218	0.204115	0.512668	0.552564	0.844982	0.915978	0.379815	0.352453	1481	1271	2045	1476	2442	1408	2784	2641
C1_11650W	EGD1	Q59TU0	17	Nascent polypeptide-associated complex subunit beta (NAC-beta) (Beta-NAC)	0.484196	-0.245235	-0.477002	-1.20643	0.161621	0.719399	0.152183	3.92839e-05	79401	83753	119510	137677	41149	80084	57122	61457
C1_11660W	GAD1	A0A1D8PF79	63.8	Glutamate decarboxylase (EC 4.1.1.15)	-0.18154	-0.199716	0.852491	0.834315	0.166135	0.219094	1.55605e-16	2.10919e-15	7234	7164	7693	6720	11522	14886	12860	14299
C1_11700C	MRF1	Q59TU5	38.6	Mrf1p	-0.616969	-0.417	0.515726	0.715694	0.0976789	0.467092	0.167507	0.0458267	4004	3967	2997	2889	3894	7918	4977	5260
C1_11750W	AVT4	A0A1D8PF84	71.7	Avt4p	-0.34687	1.13024	-1.18326	0.293858	0.787877	0.370084	0.181209	0.809608	489	776	279	816	242	323	615	846
C1_11760C	C1_11760C	A0A1D8PF88	24.1	MICOS complex subunit	-0.62389	0.239021	0.0726559	0.935567	0.424905	0.924083	0.942944	0.178349	943	1521	1345	501	1205	1407	2016	1633
C1_11770C	C1_11770C	A0A1D8PF76	109.8	ApbA_C domain-containing protein	2.1416	1.15365	1.94497	0.957022	0.0186674	0.428506	0.0327897	0.370387	102	500	1513	1469	1419	834	2976	3156
C1_11810W	CAS1	A0A1D8PF81	93.3	ATP-dependent DNA helicase	2.02546	-2.16576	2.36851	-1.82271	0.669511	0.798978	0.573937	0.693115	0	111	245	259	0	626	81	70
C1_11860W	C1_11860W	A0A1D8PF90	133.9	Uncharacterized protein	-0.358268	0.0215592	-0.517687	-0.13786	0.0521059	0.984095	0.00241095	0.540216	118249	101445	93431	100308	72904	82144	91018	95967
C1_11870W	MUP1	Q5A3J0	60.7	Mup1p	0.728216	1.61655	-0.970412	-0.0820739	0.841253	0.753536	0.747218	0.989446	82	65	170	109	0	83	144	132
C1_11880W	MRPL51	Q5A3J1	16.1	54S ribosomal protein L51, mitochondrial	0.146308	-1.14409	-0.187651	-1.47805	0.894536	0.133563	0.819881	0.0115557	816	1078	1243	1130	603	1110	593	303
C1_11890W	C1_11890W	Q5A3J2	38.3	Uncharacterized protein	-1.85614	-1.25057	1.71262	2.31819	0.686376	0.919452	0.683548	0.575142	237	0	79	0	507	260	148	250
C1_11900C	C1_11900C	Q5A3J3	45.8	Smg4_UPF3 domain-containing protein	-9.12491	-0.0170296	0.55327	9.66115	0.00894751	1	0.907744	0.005669	179	0	0	0	134	133	164	151
C1_11920W	C1_11920W	Q5A3J5	46.1	Uncharacterized protein	1.14815	0.43527	1.83354	1.12067	0.170611	0.827435	0.0134198	0.170791	123	158	546	176	521	479	837	783
C1_11930W	C1_11930W	A0A1D8PF97	115.1	PH domain-containing protein	0.787852	0.145399	1.05538	0.412923	0.0872426	0.938272	0.0133702	0.429248	2681	1545	5220	3167	4089	4826	5938	5744
C1_11980W	NUT2	Q5A3K2	18.7	Mediator of RNA polymerase II transcription subunit 10 (Mediator complex subunit 10)	-0.112306	-1.21133	-0.716106	-1.81513	0.900481	0.0310032	0.164933	7.41119e-05	553	535	474	656	262	417	170	173
C1_11990W	C1_11990W	Q5A3K3	17	Uncharacterized protein	-0.520809	-0.265891	0.886003	1.14092	0.451379	0.875108	0.131784	0.0458267	426	257	267	273	701	557	642	620
C1_12030W	SER33	Q5A3K7	50.3	D-3-phosphoglycerate dehydrogenase (EC 1.1.1.399) (EC 1.1.1.95)	-1.07854	0.122928	-0.686774	0.514698	8.45047e-10	0.803953	0.000182252	0.00842066	27594	25127	15595	12806	13331	20201	20691	22111
C1_12050W	RPN2	Q5A3L0	104.7	26S proteasome regulatory subunit RPN2	0.365292	-0.0527352	0.584508	0.166481	0.0190511	0.93744	5.07516e-05	0.361523	5684	5610	8754	7757	8082	9006	8906	10696
C1_12080W	LCB4	Q5A3L3	58.6	Sphinganine kinase	-0.727988	-0.0322456	0.443774	1.13952	0.289794	1	0.536059	0.0640071	224	318	234	140	372	366	344	521
C1_12100C	PXA2	A0A1D8PFB0	75.3	ATP-binding cassette long-chain fatty acid transporter	-1.2973	-0.719901	0.492535	1.06993	0.696814	0.942919	0.88631	0.744586	141	468	0	265	408	450	286	334
C1_12140W	C1_12140W	Q5A3M0	17.9	CoA_binding domain-containing protein	1.28821	0.141606	1.10568	-0.0409202	0.00925568	0.950549	0.0268782	0.973879	874	1162	3864	1853	2399	1950	2843	2942
C1_12150C	C1_12150C	A0A1D8PFB7	23.2	Uncharacterized protein	-8.37199	0.346531	0.413504	9.13203	0.0217007	0.988123	0.935151	0.0115692	0	109	0	0	86	55	91	128
C1_12160W	MSO1	Q5A3M2	19.3	Mso1p	1.20837	0.939533	-0.152681	-0.42152	0.000149342	0.0136232	0.745805	0.267454	232	300	750	644	213	272	537	562
C1_12180C	C1_12180C	Q5A3M4	44.6	Uncharacterized protein	0.382834	-0.199097	1.51324	0.93131	0.292564	0.797754	7.76529e-08	0.00205412	617	555	949	789	1680	1681	1512	1991
C1_12200W	MCD4	Q5A3M6	110.6	GPI ethanolamine phosphate transferase 1 (EC 2.-.-.-)	-0.694	-0.199728	0.466354	0.960626	0.443145	0.954602	0.609371	0.238912	599	286	440	194	592	646	578	706
C1_12210W	TRP3	A0A1D8PFC8	58.2	Bifunctional anthranilate synthase/indole-3-glycerol-phosphate synthase	-3.88412	-0.337833	-4.62606	-1.07978	0.0181985	0.971392	0.00346314	0.613988	3344	129685	5008	5057	2088	3372	2672	2370
C1_12230W	SNT1	A0A1D8PFD3	112.2	Snt1p	-0.156846	-0.0706412	0.517143	0.603347	0.566738	0.938272	0.012289	0.00347167	65656	74962	75542	67446	102044	99561	100539	129422
C1_12240C	C1_12240C	A0A1D8PFC1	52.2	Putative alanine--tRNA ligase	-1.13861	-0.302541	-0.38956	0.44651	0.00131102	0.700696	0.35593	0.292236	9138	10990	5283	5059	9031	6104	7031	7899
C1_12250C	C1_12250C	Q5A3N2	66.2	Uncharacterized protein	1.07289	1.37402	0.730726	1.03186	0.219381	0.193533	0.418525	0.233532	755	699	1999	1489	697	1831	1802	5760
C1_12270W	SRT1	A0A1D8PFD1	36.2	Alkyl transferase (EC 2.5.1.-)	-0.572188	-0.760743	-0.140451	-0.329006	0.261803	0.218792	0.820841	0.564604	182	189	149	134	153	188	122	116
C1_12280C	C1_12280C	Q5A3N5	27.7	Mitochondrial 54S ribosomal protein YmL13	-0.162776	-0.574116	-0.301343	-0.712683	0.864253	0.564175	0.673668	0.250302	2885	3041	3294	2722	1256	3805	1898	1974
C1_12290C	RBD1	A0A1D8PFE0	74.8	RHOMBOID-like protein (EC 3.4.21.-) (Rhomboid-like protein)	10.5237	-0.54185	11.067	0.00144323	2.37012e-10	0.72648	2.245e-11	1	0	0	278	332	278	538	351	298
C1_12310C	CSI2	A0A1D8PFE1	33.9	Csi2p	-0.781599	-0.474577	0.0826744	0.389697	0.0580573	0.465396	0.88773	0.410555	1150	922	846	535	1013	1211	1033	860
C1_12320C	ATP19	A0A1D8PFD4	7.4	F1F0 ATP synthase subunit k	0.861	-0.349267	-0.229772	-1.44004	0.000881506	0.422359	0.475623	6.55486e-09	30534	34803	66519	67573	30736	24577	26658	25713
C1_12340C	MRPS9	O94150	38.6	37S ribosomal protein S9, mitochondrial	-0.0655783	0.313115	-0.00274864	0.375945	0.940541	0.719399	0.999651	0.437335	841	661	979	663	600	938	1056	1182
C1_12350W	C1_12350W	Q5A3P1	113.7	Exosome catalytic subunit	-0.925706	-0.136861	-0.726857	0.0619878	8.42324e-05	0.843496	0.00269172	0.876809	1505	1471	844	925	784	1045	972	989
C1_12360C	RIB3	Q5A3V6	22.6	3,4-dihydroxy-2-butanone 4-phosphate synthase (DHBP synthase) (EC 4.1.99.12)	-0.0975037	-0.223997	-0.583325	-0.709818	0.891093	0.820444	0.148919	0.0731386	3286	4060	3584	4145	1757	3300	2682	2338
C1_12370W	C1_12370W	A0A1D8PFG6	18.6	Uncharacterized protein	-1.02314	-0.173981	1.3884	2.23756	0.000858804	0.834822	1.06873e-06	3.16509e-15	371	329	194	196	907	937	992	956
C1_12380C	WRS1	Q5A3P4	48.1	Tryptophan--tRNA ligase	-0.28082	-0.0399534	0.361912	0.602779	0.705192	0.996933	0.571496	0.309658	2125	1289	2133	1108	2225	2190	2277	2864
C1_12390C	RPL27A	A0A1D8PFG4	15.5	60S ribosomal protein L27	0.452022	-0.947183	0.384307	-1.0149	0.674786	0.443578	0.701783	0.235326	9465	12683	17805	16475	4631	26344	10466	7426
C1_12410C	PKH2	Q5A3P6	106.5	Serine/threonine-protein kinase PKH2 (EC 2.7.11.1) (PKB-activating kinase homolog 2)	-0.539489	-0.232575	0.665346	0.97226	0.491627	0.924083	0.343014	0.144332	291	460	409	185	538	666	629	582
C1_12450C	IRA2	A0A1D8PFE8	304.7	Ras GTPase activating protein	-0.786878	0.206333	1.47736	2.47057	0.833225	0.99363	0.602692	0.352453	201	68	0	169	416	333	443	602
C1_12490W	PEP1	A0A1D8PFH5	150.4	Sortilin	-0.0686382	-0.079916	0.151236	0.139958	0.833081	0.915257	0.527301	0.580231	11372	11405	11844	12685	12619	12788	13295	15425
C1_12510W	RAX2	A0A1D8PFE5	154.3	Rax2p	-0.621404	0.320601	0.234176	1.17618	0.442946	0.869013	0.797304	0.085837	4498	4915	3640	3296	7872	2763	7451	9141
C1_12540W	C1_12540W	A0A1D8PFG1	20.9	Uncharacterized protein	0.306456	0.311284	-0.23082	-0.225993	0.276682	0.426746	0.41634	0.443339	1974	2060	3151	2523	1713	1740	2289	2831
C1_12550C	CDC54	A0A1D8PFE6	102.4	DNA helicase (EC 3.6.4.12)	-1.11342	-1.90944	1.57822	0.782206	0.270166	0.0747143	0.0819731	0.464822	2470	1984	1308	1038	1797	12570	2093	2158
C1_12570C	C1_12570C	Q59M28	49.2	Elongator subunit	-8.83089	-0.562116	2.01869	10.2875	0.00729825	0.972467	0.569788	0.00149723	146	0	0	0	333	262	229	258
C1_12590W	ATP20	Q59M30	12.6	F1F0 ATP synthase subunit g	-0.0571893	-0.057929	0.459655	0.458915	0.862828	0.944131	0.0152593	0.0173006	16782	15819	19753	15905	21516	23709	22751	28994
C1_12600C	CHR1	Q9Y7C4	65.4	ATP-dependent RNA helicase CHR1 (EC 3.6.4.13)	-1.92192	-2.49116	0.398859	-0.170379	0.0208487	0.00530271	0.714982	0.901979	727	874	276	205	490	1742	145	307
C1_12610W	C1_12610W	Q59M32	24.6	Mitochondrial 54S ribosomal protein YmL15	0.533189	-0.443407	0.425723	-0.550874	0.364902	0.640754	0.461159	0.333867	814	1012	1175	1780	1021	1480	863	1303
C1_12620W	SPA2	A0A1D8PFH4	164.4	Spa2p	0.194563	0.117169	0.0623803	-0.0150129	0.451379	0.834822	0.83144	0.975743	5823	7402	9598	7599	6544	7374	9220	8699
C1_12630C	CWC15	Q59PD3	26	Pre-mRNA-splicing factor CWC15	0.620772	0.831356	-0.759451	-0.548867	0.111905	0.0551884	0.0380559	0.163608	1176	1213	2576	1627	717	698	1620	1386
C1_12640W	C1_12640W	Q59PD4	15.7	Uncharacterized protein	-7.03006	-0.978538	2.46091	8.51244	0.213556	0.971239	0.689483	0.110241	0	43	0	0	135	96	140	0
C1_12660W	MAD1	Q59PD6	82.2	Spindle assembly checkpoint component MAD1	-0.464299	-0.57529	0.459041	0.34805	0.42948	0.462083	0.404594	0.56621	2259	2460	1927	1940	2006	4756	2962	2243
C1_12680W	C1_12680W	A0A1D8PFH2	57.7	Ribosome biosynthesis protein	-0.423278	-0.463818	0.11863	0.0780899	0.392644	0.50628	0.835435	0.909442	5674	5926	6793	3174	5695	7071	5676	5261
C1_12710C	C1_12710C	A0A1D8PFG3	52.8	EAF domain-containing protein	2.05584	-5.45288	1.04669	-6.46203	0.818572	0.585609	0.899659	0.302478	680	612	0	5790	2454	0	72	0
C1_12740W	C1_12740W	A0A1D8PFI5	107.2	USP domain-containing protein	0.0729138	0.127272	-0.292331	-0.237973	0.953332	0.967436	0.673668	0.754421	1018	914	1028	1261	946	608	1163	900
C1_12760W	BCP1	Q59PE7	37.4	Protein BCP1	0.0819379	-1.51839	1.25326	-0.347064	1	0.797754	0.683548	0.934891	139	109	113	181	250	354	244	0
C1_12770W	RPG1A	Q59PL9	106	Eukaryotic translation initiation factor 3 subunit A (eIF3a) (Eukaryotic translation initiation factor 3 110 kDa subunit homolog) (eIF3 p110) (Translation initiation factor eIF3, p110 subunit homolog)	0.0431439	0.00685492	0.554245	0.517956	0.911469	1	0.00435504	0.0097901	6591	5812	7882	6650	9168	9126	11232	10714
C1_12780W	RBK1	A0A1D8PFI3	41.8	Ribokinase (RK) (EC 2.7.1.15)	-0.370509	-0.667367	0.077608	-0.219251	0.0464189	0.000260779	0.751337	0.289139	2517	2426	2130	2194	2318	2980	1939	2000
C1_12800W	C1_12800W	A0A1D8PFJ7	18.6	MFAP1 domain-containing protein	2.10937	1.19114	0.158701	-0.759527	0.17738	0.681273	0.942944	0.691761	102	346	2136	137	232	270	782	574
C1_12820C	C1_12820C	A0A1D8PFJ8	25	DNA-directed RNA polymerase core subunit	1.50461	-0.835378	1.56737	-0.772617	0.83702	0.973629	0.800426	0.920528	143	0	232	233	0	475	284	0
C1_12850W	BLP1	P0CT51	9	Blood-induced peptide 1	-0.161582	-0.451946	0.548093	0.25773	0.704555	0.297358	0.0727387	0.477472	9729	8225	9652	8582	14332	11816	10291	12778
C1_12880C	C1_12880C	Q5AL59	60.2	HTH CENPB-type domain-containing protein	0	-0.238278	10.0598	10.0013	1	0.977429	5.65662e-07	1.02576e-06	0	0	0	0	188	208	200	199
C1_12960C	BNI1	Q5AL52	196.7	Formin BNI1	-0.752516	-0.416958	-1.08796	-0.752404	0.659453	0.937513	0.451815	0.643235	2525	226	888	975	682	626	382	799
C1_12970C	SEC2	Q5AL49	85.3	Rab guanine nucleotide exchange factor SEC2 (GDP-GTP exchange factor SEC2)	0.415866	0.552072	-0.92793	-0.791724	0.548671	0.571679	0.0995886	0.180298	2573	4607	5084	5683	2284	1410	3612	2987
C1_13020C	SPC3	Q5AL47	21.8	Signal peptidase subunit 3 (EC 3.4.-.-)	0.544194	0.710861	-0.370158	-0.203491	0.247649	0.215668	0.449356	0.718236	230	287	449	405	159	250	385	399
C1_13030C	C1_13030C	Q5AL46	89.7	Cysteine--tRNA ligase	-0.640556	0.269223	-0.563999	0.345781	0.000149605	0.313187	0.000994053	0.0655718	20847	23469	16204	15946	13029	17447	23243	19980
C1_13050W	RPL14	A0A1D8PFL9	14.7	Ribosomal 60S subunit protein L14B	1.10697	-0.334458	1.17613	-0.265299	0.0435602	0.802723	0.0270188	0.717864	8957	8561	22062	20708	9630	32209	19241	18391
C1_13060C	MEF1	Q5AL45	84.3	Elongation factor G, mitochondrial (EF-Gmt) (Elongation factor G 1, mitochondrial) (mEF-G 1) (Elongation factor G1)	-0.548443	0.236233	-0.165724	0.618952	0.186561	0.800155	0.742727	0.118401	15098	15661	11296	12435	16287	10717	18308	20435
C1_13070C	FAD3	A0A1D8PFL5	49.9	Fad3p	2.45188	0.368421	0.70533	-1.37812	0.0248577	0.93744	0.602875	0.25993	362	518	5135	533	596	866	1088	1128
C1_13080W	OP4	A0A1D8PFJ9	41.5	Op4p	-0.932615	-1.61968	2.53465	1.84758	0.78453	0.742158	0.297128	0.489348	212	305	322	0	918	2201	578	588
C1_13110C	CHS3	A0A1D8PFK5	136.1	Chitin synthase	1.4685	0.104062	0.864333	-0.500101	9.26861e-21	0.827503	1.43825e-07	0.00437475	985	1043	3349	3015	1658	2086	2184	2577
C1_13120C	MON2	A0A1D8PFK4	187.2	Mon2p	-2.01382	-0.951374	0.0783304	1.14078	0.011012	0.467092	0.949706	0.197524	435	434	63	175	451	472	245	325
C1_13140C	TYE7	Q5AL36	30.5	Carbohydrate metabolism regulator TYE7	0.815228	0	-8.90287	-9.96833	0.940947	1	0.113148	0.074923	0	177	145	200	0	0	0	0
C1_13160W	PSA2	Q5AL34	50.8	Psa2p	0	-0.645929	10.9704	10.5042	1	0.828549	2.48657e-09	2.31389e-08	0	0	0	0	296	460	232	335
C1_13190W	C1_13190W	A0A1D8PFM0	18.6	DUF4149 domain-containing protein	0.179795	0.13222	0.635056	0.587481	0.712327	0.919452	0.0669907	0.0993665	9874	7561	12316	10174	14814	12168	15223	20493
C1_13220C	AKR1	Q5AL27	91.7	Palmitoyltransferase AKR1 (EC 2.3.1.225) (Ankyrin repeat-containing protein AKR1)	-0.280253	-1.45416	1.31857	0.144668	0.796304	0.083013	0.0570677	0.898031	173	325	176	281	488	781	249	293
C1_13260W	C1_13260W	A0A1D8PFM9	16.5	Peptidylprolyl isomerase (EC 5.2.1.8)	-0.010204	-0.120976	0.122322	0.0115501	0.998546	0.845104	0.674855	0.985117	6725	7725	8770	7512	6478	9583	9354	7947
C1_13270W	C1_13270W	Q5AL24	34.3	Nicotinamide-nucleotide adenylyltransferase	-0.705341	0.0159426	0.138116	0.8594	0.0265482	1	0.746429	0.00573539	5922	3846	3750	3080	4949	5965	6364	6706
C1_13300C	RPN1	A0A1D8PFL7	109.8	26S proteasome regulatory subunit RPN1	-0.0329694	0.255892	0.210092	0.498953	0.897238	0.162241	0.152021	0.000124994	17755	17380	20733	18250	19681	21271	27019	31230
C1_13310W	ECM25	A0A1D8PFN0	71.9	Ecm25p	0.883042	-2.87506	-0.467538	-4.22564	0.608254	0.0655266	0.795049	0.00064713	602	1037	1258	2107	76	1215	97	96
C1_13320C	C1_13320C	A0A1D8PFM7	64	Uncharacterized protein	-0.0715377	0.0236465	0.0264255	0.12161	0.972047	1	0.982522	0.917312	17059	20543	22284	18350	28205	8353	21632	25032
C1_13370W	C1_13370W	A0A1D8PFN5	44.8	TPR_REGION domain-containing protein (Fragment)	0.0076685	-0.436405	0.794217	0.350144	1	0.771415	0.256294	0.684434	839	528	1131	462	1029	1391	928	1182
C1_13380W	CWC26	Q5AL13	32.4	Pre-mRNA-splicing factor CWC26	0.107344	0.342979	-0.498758	-0.263123	0.891349	0.698837	0.286385	0.632245	4867	4977	6718	5347	4198	2652	4728	5881
C1_13400C	AGC1	Q5AL11	81.9	Amino acid transporter	-0.0118265	0.0135844	-0.467386	-0.441976	0.998819	1	0.102445	0.131463	36726	41282	47383	40437	31429	24526	33923	34306
C1_13410W	COX19	Q5AL10	14.6	Cytochrome c oxidase assembly protein COX19	0.182659	-0.0349467	-0.369463	-0.587068	0.828231	0.998478	0.556233	0.320776	3060	2999	4377	3451	1354	3558	3108	2369
C1_13420C	KEM1	A0A1D8PFP3	172.6	5'-3' exoribonuclease 1 (EC 3.1.13.-)	0.369088	-0.0651162	1.36554	0.931337	0.408725	0.975879	4.89405e-05	0.00992222	2071	2573	4478	2403	5627	6444	6991	6697
C1_13430C	C1_13430C	A0A1D8PFP0	65.3	Uncharacterized protein	-14.8904	-8.99621	-5.97601	0	0.00829361	0.276826	0.333995	1	5438	4413	0	0	144	0	0	0
C1_13480W	SSA1	P41797	70.3	Heat shock protein SSA1	-0.202278	-0.228403	0.493866	0.467741	0.083658	0.0985732	8.92495e-07	5.26952e-06	368132	401107	397743	360170	486013	612476	515738	593264
C1_13520C	MCU1	Q5AKZ4	31.8	Mcu1p	0.621048	-0.397599	0.326708	-0.691939	0.166135	0.593009	0.501237	0.105811	535	756	1020	1212	716	925	644	829
C1_13550C	NUP49	A0A1D8PFQ0	47	FG-nucleoporin	1.41602	0.973856	0.611842	0.16968	5.34818e-12	1.73123e-05	0.00661132	0.562873	2041	2037	6492	5852	3277	2950	7405	7266
C1_13570W	MPT5	A0A1D8PFN4	104	Mpt5p	0	0.153467	9.40601	9.73927	1	0.994792	4.32967e-05	2.9337e-05	0	0	0	0	118	134	126	208
C1_13580W	SEC18	A0A1D8PFN6	89.1	AAA family ATPase	-0.209151	-0.221521	-0.283869	-0.29624	0.293558	0.41878	0.115826	0.102424	11920	11503	11108	11787	8271	11328	9825	9962
C1_13620W	ROB1	A0A1D8PFP2	113.6	Rob1p	-0.127567	0.0851478	-0.397174	-0.184459	0.912664	0.981527	0.602389	0.842318	2491	3960	3112	3528	1684	3375	4211	1965
C1_13630W	CYB2	Q5AKX8	62.9	Cyb2p	-1.55105	-0.743258	2.06824	2.87603	0.0111263	0.436753	0.000225041	3.52759e-07	117	209	69	57	752	602	444	533
C1_13650C	C1_13650C	Q5AKX4	50.4	Uncharacterized protein	0.694945	-0.560661	0.0984088	-1.1572	0.501341	0.773381	0.939346	0.197524	187	260	461	361	252	225	101	290
C1_13670W	OSM2	Q5AKX2	70.4	Fumarate reductase	-0.709917	-0.062655	0.292216	0.939478	3.05728e-05	0.937231	0.134312	2.33927e-08	13841	12241	10161	8002	13715	18844	17626	19084
C1_13680C	GCV3	Q5AKX1	20	Glycine cleavage system H protein	0.52882	-0.89875	0.593818	-0.833752	0.030257	0.000217507	0.0117134	0.000271708	81257	92912	134721	148616	102745	166825	87096	81681
C1_13690C	C1_13690C	A0A1D8PFS0	12.5	SNAP receptor	0.43308	-0.25764	0.570836	-0.119884	0.293409	0.753826	0.129438	0.819886	4306	4295	6580	6559	7332	5306	6963	5830
C1_13700W	ACT1	A0A1D8PFR4	41.7	Actin	-0.247432	-0.208508	0.481561	0.520485	0.151863	0.391955	0.0011952	0.000504757	69177	59382	67681	55576	79749	102743	90784	95697
C1_13710C	DAD1	A0A1D8PFP9	11.5	Dad1p	0.833166	-1.32169	0.949147	-1.20571	0.212097	0.0657433	0.131784	0.0489644	3493	3885	7628	7252	3284	11793	3537	3286
C1_13730C	DIM1	Q5AKW7	36.8	rRNA adenine N(6)-methyltransferase (EC 2.1.1.-)	-0.081692	0.00819548	1.03398	1.12387	0.969361	1	0.192176	0.158067	248	402	527	183	632	707	888	709
C1_13760W	AGM1	Q5AKW4	60.4	Phosphoacetylglucosamine mutase (PAGM) (EC 5.4.2.3) (Acetylglucosamine phosphomutase) (N-acetylglucosamine-phosphate mutase)	0.0311588	0.475801	0.215009	0.659651	0.966825	0.190633	0.503299	0.0136625	6154	5607	6660	6931	5200	8848	11268	11507
C1_13780W	MYO2	Q5AKW2	178.6	Myosin 2	0.355327	-0.104071	0.360518	-0.0988799	0.1968	0.904636	0.171875	0.783411	8903	11968	17674	12726	11673	15531	14485	15358
C1_13790C	C1_13790C	Q5AKW1	13.7	Uncharacterized protein	1.55332	0.703873	-1.62214	-2.47159	0.74916	0.967989	0.703766	0.546047	46	102	265	226	44	0	92	0
C1_13820C	C1_13820C	Q5AKV7	37.7	Uncharacterized protein	0.574369	0.433199	1.01039	0.869223	0.566738	0.834822	0.232307	0.331605	642	605	1118	990	1830	577	2049	2018
C1_13830C	PDX1	Q5AKV6	46	Pdx1p	-0.217791	-0.224699	0.0373804	0.0304724	0.0146042	0.0283233	0.760292	0.818134	24103	24819	24985	22714	23436	27312	24423	27113
C1_13860C	GND1	A0A1D8PFS4	54.3	6-phosphogluconate dehydrogenase, decarboxylating (EC 1.1.1.44)	-0.294503	0.179922	-0.0196174	0.454808	0.106432	0.554466	0.942944	0.00682678	522757	526185	489199	478881	527356	509679	666513	739760
C1_13870W	MET3	Q9Y872	58.8	Sulfate adenylyltransferase (EC 2.7.7.4) (ATP-sulfurylase) (Sulfate adenylate transferase) (SAT)	0.20305	-0.0847037	0.666514	0.37876	0.741858	0.971392	0.127357	0.449502	15563	19139	31371	14612	21598	34845	30081	32130
C1_13880C	C1_13880C	Q5AKV1	133.1	Uncharacterized protein	-8.5237	-0.0793063	1.36172	9.80612	0.0129192	1	0.734259	0.0037707	118	0	0	0	151	158	159	190
C1_13900C	LCB2	Q5AKV0	63.3	Serine C-palmitoyltransferase	1.71387	-1.84858	2.30254	-1.25991	0.235847	0.333556	0.0804751	0.408238	3299	6615	35682	2629	6309	46276	8567	7627
C1_13920W	DOS2	Q5AKU7	41.5	Dos2p	-0.47196	0.0816418	-0.848799	-0.295197	0.193966	0.964155	0.0071029	0.45471	3202	4780	3828	2722	1936	2559	2735	2875
C1_13930W	SSK1	Q5AKU6	73.5	Oxidative stress response two-component system protein SSK1	-0.018205	0.711252	1.13721	1.86667	1	0.787761	0.350516	0.0982838	171	665	413	509	1357	385	1550	2039
C1_13940W	SIM1	Q5AKU5	39.4	Secreted beta-glucosidase SIM1 (EC 3.2.1.-)	0.97538	-0.101019	0.00678261	-1.06962	0.0169413	0.964476	0.995073	0.00844178	12810	11796	23245	31119	14659	9713	13922	13721
C1_13950C	ATG12	Q5AKU4	18	Ubiquitin-like protein ATG12 (Autophagy-related protein 12)	9.15725	-0.265097	9.56648	0.144129	2.08879e-07	0.94771	5.13732e-08	0.928259	0	0	144	96	110	176	114	165
C1_13960W	YBP1	Q5AKU3	73.9	CAP1-binding-protein	0.970439	-0.595767	0.15022	-1.41599	0.0272827	0.374007	0.803073	0.000704911	5285	5885	12428	12322	3731	9210	5249	4566
C1_13970C	HPC2	Q5AKU2	60.1	Hpc2p	-2.15569	-0.395393	-0.026291	1.73401	1.47876e-05	0.740636	0.978733	0.000847832	345	260	66	87	266	338	284	258
C1_14030W	C1_14030W	A0A1D8PFU2	37.4	Uncharacterized protein	-3.5954	0.0965727	0.762736	4.45471	0.0577021	1	0.756545	0.0144717	206	180	38	0	334	323	394	447
C1_14040W	APL1	A0A1D8PFU6	87.3	AP complex subunit beta	-2.65754	-0.148727	0.502961	3.01178	0.524462	1	0.91961	0.443339	366	0	70	0	251	279	256	313
C1_14060W	C1_14060W	A0A1D8PFV8	56.9	17-beta-hydroxysteroid dehydrogenase-like protein	0.846558	-0.6445	1.40435	-0.0867121	3.57616e-06	0.00208284	1.09146e-15	0.76062	5466	5898	11835	11300	12035	18767	11402	11658
C1_14080W	UTP10	Q59ZX6	204.2	U3 small nucleolar RNA-associated protein 10	0.124735	0.434203	0.529609	0.839076	0.837567	0.485791	0.186352	0.0250983	1931	1805	2634	2008	3085	2255	4145	4601
C1_14090W	C1_14090W	A0A1D8PFU8	11.5	Uncharacterized protein	0.534388	-0.208839	-0.0884482	-0.831675	0.00415487	0.533389	0.729842	2.91531e-06	48474	47392	74820	81926	38291	53653	43049	50601
C1_14100W	YPT52	A0A1D8PFT9	24.3	Rab family GTPase	-0.157742	-0.0951706	0.498618	0.561189	0.591006	0.902993	0.0238963	0.011179	10242	8844	9822	9566	13789	13257	14040	16285
C1_14110C	RPL4B	A0A1D8PFV1	39.2	Ribosomal 60S subunit protein L4B	-0.0127642	-0.144757	-0.511186	-0.643179	0.973474	0.521114	2.04416e-05	7.13013e-08	398798	438019	485505	453922	259312	336902	333694	302079
C1_14120C	RBE1	Q59ZX3	29.1	Repressed by EFG1 protein 1 (PRY family cell wall protein 2)	-0.0122598	-2.99585	0.61376	-2.36983	1	0.437036	0.856441	0.408361	420	597	587	553	87	1613	0	237
C1_14130W	FTR1	A0A1D8PFV0	42.5	High-affinity iron permease	-1.82523	0.456315	-2.67139	-0.389851	2.50537e-08	0.436753	5.57495e-17	0.361871	13461	12334	4420	3849	2367	1633	3094	3577
C1_14140C	SET3	A0A1D8PFV9	119.7	Histone-binding protein	-1.14294	0.692763	-0.235101	1.60061	0.381196	0.797754	0.88238	0.174236	1953	1886	1552	470	2618	457	2857	3474
C1_14150C	PAM16	Q59ZW9	13.3	Mitochondrial import inner membrane translocase subunit TIM16 (Presequence translocated-associated motor subunit PAM16)	-2.10083	-0.142103	-2.16164	-0.202914	6.52355e-44	0.711911	2.08864e-46	0.322921	17519	17370	5269	3997	3716	4153	4373	4094
C1_14230C	IRR1	A0A1D8PFW4	126.7	Irr1p	-1.26267	-1.7564	-0.0562722	-0.550006	0.215782	0.140695	0.971572	0.650656	111	280	77	105	135	251	56	77
C1_14240W	C1_14240W	A0A1D8PFW3	64.3	Uncharacterized protein	-0.0174535	-0.0184676	-0.351208	-0.352222	0.970786	0.987063	0.0295579	0.0319585	10429	10006	11165	11658	6958	9347	9266	9705
C1_14260C	TIF35	Q59ZV5	30.7	Eukaryotic translation initiation factor 3 subunit G (eIF3g) (Eukaryotic translation initiation factor 3 RNA-binding subunit) (eIF-3 RNA-binding subunit) (Translation initiation factor eIF3 p33 subunit homolog) (eIF3 p33 homolog)	0.150905	0.151492	-0.315667	-0.315081	0.492595	0.670435	0.0793965	0.0844096	6192	5499	7373	7326	4123	5434	6021	6503
C1_14280C	NPL3	A0A1D8PFV4	32.2	mRNA-binding protein	-0.281998	-0.551417	-0.459989	-0.729407	0.167689	0.00577771	0.0107159	2.49312e-05	12200	11879	10492	11849	7810	9964	7135	7187
C1_14290C	MDG1	A0A1D8PFV7	70.5	Mdg1p	0.454025	-0.179205	0.591682	-0.0415472	0.0114726	0.589217	0.000534024	0.886644	283599	311162	455121	465550	457619	439921	457446	491453
C1_14300C	NCR1	A0A1D8PFW9	141	Sphingolipid transporter	-0.397642	-0.467634	1.36736	1.29737	0.386277	0.439239	9.34809e-05	0.000304091	1163	1459	1381	892	3652	3076	2951	2904
C1_14320C	C1_14320C	A0A1D8PFV6	25.7	FAA_hydrolase domain-containing protein	0.333531	-0.0903772	-0.206761	-0.630669	0.261719	0.936097	0.505464	0.0148513	140862	155925	199765	221934	138203	117885	133741	155965
C1_14340C	RIM101	Q9UW14	74.6	pH-response transcription factor pacC/RIM101 (pH-response regulator protein 2)	3.43103	10.7053	-7.75804	-0.483732	0.253314	0.000988916	0.0116961	0.912621	78	0	482	482	0	0	443	285
C1_14350W	YPI2	Q59ZU1	16.8	Type 1 phosphatases regulator YPI2	0.335252	0.0552337	-0.577864	-0.857882	0.462356	0.98085	0.140276	0.0199352	438	497	639	692	302	329	343	438
C1_14390W	RPC10	A0A1D8PFX2	8	DNA-directed RNA polymerase core subunit	0.512082	0.414577	-0.681794	-0.779298	0.455004	0.740636	0.267947	0.201985	2897	1863	5236	2599	1450	1546	2906	1832
C1_14410W	C1_14410W	A0A1D8PFX4	8.4	RNA-binding protein	-0.0161199	-0.333198	-0.233459	-0.550538	0.998437	0.61356	0.5949	0.145993	1942	2714	2285	2883	1931	2047	1765	1999
C1_14420W	DDI1	A0A1D8PFX6	35.9	Ddi1p	-1.07964	1.20068	-2.53885	-0.258521	0.750003	0.848945	0.321413	0.954078	241	457	195	178	110	0	89	243
C1_14440C	GDI1	A0A1D8PFX8	50.1	Rab GDP dissociation inhibitor	-0.213897	0.199377	0.445856	0.85913	0.263718	0.463423	0.00558152	1.51674e-08	4409	3943	4371	3810	5023	6545	7406	8277
C1_14450C	C1_14450C	A0A1D8PFY5	51.3	Putative Xaa-Pro dipeptidase	-0.218814	0.48396	-0.815963	-0.113188	0.539706	0.203219	0.00214949	0.779313	10690	7602	8637	9158	4572	6014	8856	8598
C1_14460W	C1_14460W	A0A1D8PFZ8	34.9	Proteasome regulatory particle lid subunit	-0.211053	0.000895997	0.158752	0.370702	0.556182	1	0.658427	0.232129	2890	3996	3321	3392	3202	4630	4681	4518
C1_14490C	SAM35	A0A1D8PFY3	28.1	SAM complex subunit	1.66006	-0.426464	1.25812	-0.828397	0.579783	0.973629	0.672165	0.806512	59	0	121	94	79	63	79	48
C1_14500C	C1_14500C	A0A1D8PFY0	24.8	Polyamine acetyltransferase	0.120097	-0.663382	-0.695384	-1.47886	0.914807	0.50628	0.28302	0.0104119	7383	6767	11200	6449	2252	6960	3551	3059
C2_00070C	MPP10	A0A1D8PFZ9	65.1	U3 small nucleolar ribonucleoprotein protein MPP10	0.483554	-0.190924	-0.589853	-1.26433	0.00216501	0.49379	0.000112481	3.95731e-18	8577	10185	14945	14713	5498	7154	6234	6852
C2_00100C	PGA52	Q59L72	41.5	GPI-anchored protein 52	-0.455566	-23.9265	1.24321	-22.2277	0.973474	4.90319e-07	0.850047	1.27293e-06	78	116	0	152	0	507	0	0
C2_00140W	NDT80	Q5ACU9	58.2	Transcription factor	1.21029	0.258272	1.28723	0.335215	2.26681e-07	0.580097	3.1728e-08	0.242214	786	949	2482	2075	1719	2608	3003	3062
C2_00160C	NAT2	A0A1D8PG06	23.8	Nat2p	0.202345	0.515453	1.51399	1.82709	0.951883	0.932343	0.360277	0.265499	563	1255	2392	80	3594	1388	4114	4749
C2_00170C	HMA1	A0A1D8PG18	48.9	tRNA threonylcarbamoyladenosine dehydratase	0.0620703	-1.14225	-0.160633	-1.36496	0.973444	0.171965	0.855657	0.0313447	7271	7310	8767	8469	2826	11027	3804	3272
C2_00180C	C2_00180C	Q5ACV3	34.4	Uricase (EC 1.7.3.3) (Urate oxidase)	0.183822	-0.25207	2.15708	1.72119	0.920705	0.957054	0.0199566	0.0789576	583	243	876	224	1784	1949	2466	1243
C2_00190C	C2_00190C	Q5ACV4	51.8	Peroxisome biogenesis protein	-0.447371	0.126607	0.131339	0.705317	0.14558	0.889494	0.72218	0.011009	1178	1565	1232	1049	1320	1728	2057	1865
C2_00210W	RPL38	A0A1D8PG16	8.9	Ribosomal 60S subunit protein L38	0.285218	-0.609252	0.391996	-0.502474	0.322054	0.0306536	0.130919	0.0458267	52056	61788	81163	75883	56459	97094	59803	57422
C2_00220C	C2_00220C	A0A1D8PG13	44.1	Transcription factor IIF subunit	0.773788	-0.380846	0.253185	-0.901449	0.142995	0.715596	0.687001	0.072022	274	258	520	510	231	423	257	328
C2_00230W	C2_00230W	A0A1D8PG12	53.7	Arginyltransferase	-8.91659	2.14736	-0.982427	10.0815	0.0861465	0.881583	0.884721	0.0453129	0	159	0	0	73	0	174	249
C2_00250W	STF2	A0A1D8PG09	10.5	Stf2p	-1.39093	-2.20778	1.05592	0.239072	0.00111883	2.28887e-07	0.0159306	0.695413	1056	1214	452	523	1718	3147	500	727
C2_00260C	MUQ1	A0A1D8PG14	42	Ethanolamine-phosphate cytidylyltransferase	0.593485	0.486064	0.34884	0.241418	0.000583896	0.016721	0.0613041	0.232554	2381	2368	4153	3964	3020	3056	5107	5047
C2_00280C	CWC24	Q5ACW2	24.2	Pre-mRNA-splicing factor CWC24	1.62931	-0.163524	0.970051	-0.822787	0.596863	0.997457	0.760047	0.809795	0	117	210	195	60	178	94	149
C2_00320W	GET1	Q5ACW6	22.9	Golgi to ER traffic protein 1 (Guided entry of tail-anchored proteins 1)	-0.557679	-11.2379	1.21566	-9.46452	0.661128	6.46495e-10	0.222736	1.31557e-07	202	116	109	135	258	509	0	0
C2_00340C	ARO8	A0A1D8PG20	54.7	Bifunctional 2-aminoadipate transaminase/aromatic-amino-acid:2-oxoglutarate transaminase	-0.174064	-0.602412	0.303349	-0.124998	0.817069	0.405362	0.597191	0.860498	6441	5947	6902	5593	4430	11585	6233	5837
C2_00360C	C2_00360C	A0A1D8PG26	79.1	Uncharacterized protein	-0.414676	0.222217	-0.648495	-0.0116021	0.310649	0.800155	0.0718481	0.990717	6272	4018	4637	4146	3366	3230	4333	4881
C2_00380C	RFA1	Q5ACX4	69.7	Replication protein A subunit	-1.15003	-0.363813	0.0895638	0.87578	0.00260039	0.629179	0.876269	0.0291405	1853	1882	804	1086	1521	2564	1686	2021
C2_00390C	C2_00390C	Q5ACX5	44.8	Cystathionine beta-lyase	0.106137	-0.198262	-0.185566	-0.489965	0.953332	0.961692	0.868428	0.630034	885	1033	1330	1019	1207	411	764	1000
C2_00400C	C2_00400C	A0A1D8PG37	27.3	Uncharacterized protein	0.223052	0.346914	-0.665088	-0.541226	0.685208	0.648692	0.10046	0.207843	44302	56065	67011	65405	38375	23708	46308	50107
C2_00410C	C2_00410C	A0A1D8PG31	143.7	ATP-dependent RNA helicase	-9.72535	-1.39014	0.369871	8.70507	0.00437012	0.889494	0.939346	0.0129112	172	102	0	0	147	216	160	0
C2_00430C	DPB4	A0A1D8PG40	29.1	DNA polymerase epsilon noncatalytic subunit	0.285634	-0.104043	-0.374898	-0.764575	0.477885	0.942859	0.298573	0.0175372	1502	1206	1935	1811	1043	1058	1017	1320
C2_00440W	SAS2	Q5ACY2	40.7	Histone acetyltransferase (EC 2.3.1.48)	-8.42399	0.10509	0.863485	9.39256	0.0182706	1	0.844575	0.00801458	0	113	0	0	130	68	120	142
C2_00470W	POM152	A0A1D8PG44	144.3	Pom152p	0.0981658	0.0960316	0.373304	0.371169	0.953721	0.981527	0.694969	0.708528	811	659	1281	539	1164	708	900	1553
C2_00520W	DFG5	Q5ACZ2	50	Mannan endo-1,6-alpha-mannosidase DFG5 (EC 3.2.1.101) (Endo-alpha-1->6-D-mannanase DFG5)	-5.70794	0.643172	-5.80542	0.545693	1.33336e-55	0.315284	4.43211e-57	0.263647	9838	10084	269	167	194	161	394	271
C2_00570W	C2_00570W	A0A1D8PG45	63.9	Uncharacterized protein	-0.275894	0.656206	-0.248549	0.683552	0.540537	0.159567	0.566851	0.0601132	2078	2491	2273	2005	2164	1645	3440	3823
C2_00580C	SMF3	Q5ACZ8	56.4	Putative divalent metal ion transporter	-2.01562	-0.221038	-2.05772	-0.263134	1.96093e-07	0.855981	1.01575e-07	0.64094	11396	9311	3491	2367	1856	3274	1954	3187
C2_00590W	C2_00590W	A0A1D8PG47	60.7	Uncharacterized protein	1.33069	-0.434205	1.42113	-0.343758	0.175661	0.869013	0.1295	0.789553	110	201	235	627	362	482	277	462
C2_00600C	C2_00600C	A0A1D8PG46	27	Nfu_N domain-containing protein	-0.519636	0.191508	-0.0286139	0.682529	0.26866	0.880275	0.966608	0.116284	1747	1864	1900	994	1689	1881	2169	2683
C2_00610C	ATP18	A0A1D8PG50	7.3	F1F0 ATP synthase subunit i	0.448008	-0.509329	0.00434419	-0.952993	0.0189767	0.0173146	0.992867	5.03223e-08	24218	28946	43768	38457	21802	32669	21477	23410
C2_00630C	C2_00630C	Q5AD02	38.2	Allantoicase	1.80771	1.50872	-0.517469	-0.816457	2.03679e-06	0.000443748	0.274951	0.0563104	305	229	1020	1095	152	230	661	613
C2_00700W	C2_00700W	Q5AD10	95.5	M-AAA protease subunit	1.15945	-0.246106	1.70019	0.294636	0.00363552	0.813121	6.08305e-06	0.569276	327	316	830	797	775	1378	904	1213
C2_00710W	NPL6	A0A1D8PG62	51.9	Npl6p	0.373682	0.189972	-0.935111	-1.11882	0.199629	0.753221	0.00011382	3.55566e-06	5153	5592	6920	8731	2709	2952	3701	3984
C2_00720C	FGR15	Q5AD13	59.1	Filamentous growth regulator 15 (Caspofungin sensitivity protein 2)	3.42293	-0.589101	2.67067	-1.34137	4.31129e-23	0.276884	4.24788e-14	0.000146485	51	67	704	725	338	423	297	301
C2_00770W	C2_00770W	Q5AD20	24	AMMECR1 domain-containing protein	1.86282	-0.766435	4.03633	1.40707	0.450969	0.919452	0.04444	0.57797	0	62	127	125	324	721	380	327
C2_00790C	C2_00790C	Q5AD22	38.8	Diacylglycerol kinase	0.484062	1.78026	-2.36623	-1.07004	0.217045	2.17092e-07	6.54915e-14	0.00158431	992	1111	2067	1297	191	221	848	830
C2_00810C	C2_00810C	Q5AD24	32.5	Uncharacterized protein	1.79715	-0.135947	0.897258	-1.03584	0.0859373	0.981527	0.436876	0.372124	315	171	885	1026	146	829	504	487
C2_00830C	C2_00830C	A0A1D8PG88	71.9	Uncharacterized protein	-0.481889	-0.545286	-0.0510418	-0.114439	0.140484	0.171558	0.911189	0.792674	4553	5025	4135	3644	4800	4442	3140	4470
C2_00840W	TAH18	Q5AD27	67.4	NADPH-dependent diflavin oxidoreductase 1 (EC 1.18.1.-) (NADPH-dependent FMN and FAD-containing oxidoreductase)	-11.4528	0.0702641	-1.8014	9.72167	0.000374009	1	0.628817	0.00366545	316	598	0	0	240	0	155	174
C2_00850W	MSF1	Q5AD28	52.5	Phenylalanine--tRNA ligase	-0.4011	0.127164	0.24732	0.775584	0.726325	0.978763	0.821491	0.407019	454	287	479	173	500	374	605	549
C2_00870W	C2_00870W	Q5AD30	17.2	Uncharacterized protein	-0.682179	0.569966	-0.612543	0.639602	0.0474654	0.216521	0.0748906	0.0653319	6752	5703	5161	3704	4495	3610	6875	7649
C2_00880W	C2_00880W	Q5AD31	40.7	GFO_IDH_MocA domain-containing protein	0.164613	1.11718	-0.78289	0.169678	0.665184	3.35878e-05	0.00284423	0.636831	5380	5743	6995	7099	2441	4208	7844	8977
C2_00950C	RFC5	A0A1D8PG80	40.9	Replication factor C subunit 5	-1.01596	-0.779752	-0.00300636	0.233205	0.00477292	0.0877801	0.998916	0.632245	791	993	566	437	922	857	564	679
C2_00960C	MXR1	Q5AD39	21.1	Peptide-methionine-S-sulfoxide reductase	0.255506	-0.492	-0.0176559	-0.765162	0.852139	0.814196	0.993334	0.437872	1731	2149	2763	2484	665	3433	1961	1291
C2_00970C	UBP13	A0A1D8PG89	79	Ubiquitin carboxyl-terminal hydrolase (EC 3.4.19.12)	0	0.260394	9.08336	9.52354	1	0.981527	0.000163194	9.38287e-05	0	0	0	0	82	122	128	159
C2_01000W	HGT7	A0A1D8PG81	60.6	Hgt7p	-0.22477	0.434854	-1.62221	-0.962585	0.648847	0.456521	5.78754e-07	0.00647151	5909	6015	6449	5159	2242	1586	3133	3143
C2_01010W	HGT8	A0A1D8PG82	61.1	Hgt8p	-1.13232	0.13391	1.86806	3.13429	0.166135	0.973629	0.00743662	3.56939e-06	81	96	54	38	399	234	360	491
C2_01020W	HGT6	Q5AD47	61.5	Hexose transporter	-0.228205	0.0401044	-0.248424	0.0198848	0.249894	0.967436	0.185551	0.954078	8751	8262	8175	8259	7044	7369	8372	9301
C2_01030W	C2_01030W	A0A1D8PG94	24.3	Mitochondrial 54S ribosomal protein YmL47	-0.242773	-0.142646	-1.53371	-1.43358	0.408725	0.819156	4.49324e-13	4.07868e-11	5841	7820	6555	6486	2050	2741	2625	2487
C2_01060C	JJJ3	Q5AD49	16.8	Diphthamide biosynthesis protein 4 (J protein type 3)	-0.0199462	22.9515	-21.8801	1.09137	1	1.0413e-06	8.55105e-07	0.879624	439	0	453	63	0	0	0	1138
C2_01070W	C2_01070W	Q5AD50	44.2	DNA-directed RNA polymerase I subunit	-0.682871	-0.549267	-0.0571512	0.0764525	0.171958	0.456107	0.935932	0.922384	4274	3685	2136	3414	2799	5100	3158	3114
C2_01110C	BCY1	Q9HEW1	50.3	cAMP-dependent protein kinase regulatory subunit (PKA regulatory subunit) (PKA-R)	0.154709	-0.371949	-0.199085	-0.725743	0.208703	0.00110275	0.0790069	1.51737e-13	17906	17344	23765	20789	14085	17016	14638	13799
C2_01120W	KAR2	A0A1D8PG96	74.5	Hsp70 family ATPase	0.370933	0.0160312	-0.534219	-0.889121	0.000451674	0.981527	1.29535e-07	3.39882e-19	58798	61810	91680	85055	35871	48908	49423	51529
C2_01130W	NOT3	Q5AD56	85.7	General negative regulator of transcription subunit 3	1.21966	0.519338	1.92109	1.22077	0.429973	0.909449	0.150994	0.415503	296	280	1473	114	1446	673	1789	1963
C2_01160W	MRI1	Q5AD59	46.2	Methylthioribose-1-phosphate isomerase (M1Pi) (MTR-1-P isomerase) (EC 5.3.1.23) (S-methyl-5-thioribose-1-phosphate isomerase) (Translation initiation factor eIF-2B subunit alpha/beta/delta-like protein)	9.92272	-0.909112	10.6302	-0.201598	6.02554e-08	0.678467	5.02228e-09	0.91011	0	0	213	192	131	487	192	180
C2_01170C	C2_01170C	A0A1D8PGA1	109.3	Uncharacterized protein	-0.472071	-0.353676	0.124158	0.242554	0.213931	0.557444	0.792111	0.573411	442	367	356	307	404	490	417	411
C2_01180W	COX17	A0A1D8PGA3	7	Copper metallochaperone	0.237346	-0.586108	-1.10026	-1.92371	0.833638	0.678052	0.130919	0.00441876	6071	11565	9657	13570	1876	6804	3182	3363
C2_01200C	REG1	A0A1D8PGA2	110.6	Protein phosphatase regulator	0.695497	0.0948056	0.51397	-0.0867214	0.00767685	0.932343	0.0577452	0.827714	39695	53595	94929	76593	70541	62147	80934	89407
C2_01210C	HNM1	A0A1D8PGA9	59.5	Hnm1p	0.58177	0.0821293	-0.207298	-0.70694	0.507222	0.984482	0.831411	0.385839	201	153	327	276	100	219	154	237
C2_01220W	C2_01220W	A0A1D8PGB0	108.6	Nuclear pore protein	0.34204	-0.11832	0.84084	0.38048	0.660184	0.969477	0.161688	0.599817	4310	12273	12244	11430	11279	19072	15734	16881
C2_01250W	C2_01250W	Q5AD68	22.5	Uncharacterized protein	10.3037	0.238556	7.74033	-2.32486	0.03933	1	0.135585	0.709776	0	0	76	432	0	87	0	113
C2_01270W	CHA1	A0A1D8PGA8	38.9	Cha1p	1.28429	-0.93872	1.27221	-0.950799	0.00313111	0.091518	0.0032088	0.0376016	657	393	1529	1381	1074	1521	862	727
C2_01320W	C2_01320W	A0A1D8PGA6	48.3	Proteasome regulatory particle lid subunit	0.735636	1.50336	0.921486	1.68921	0.000945559	1.68464e-12	1.80507e-05	2.76447e-16	1561	1594	3414	2571	2438	3673	9733	10586
C2_01330C	SIR2	O59923	58.2	NAD-dependent histone deacetylase SIR2 (EC 2.3.1.286) (Regulatory protein SIR2) (Silent information regulator 2)	0	-0.737684	7.62433	7.06642	1	0.981527	0.223612	0.278676	0	0	0	0	26	49	0	53
C2_01340W	C2_01340W	A0A1D8PGD2	65.5	Uncharacterized protein	-0.313061	0.362274	-0.373256	0.302078	0.601025	0.706874	0.485045	0.602781	1750	999	1222	1287	1025	1122	1508	1778
C2_01350C	SNX4	Q5AD77	71.8	Sorting nexin-4 (Autophagy-related protein 24)	0.854816	-1.77577	1.73944	-0.891144	0.349997	0.0506436	0.022315	0.313213	2062	1568	3737	3705	2127	10871	2276	1970
C2_01360C	DCW1	Q5AD78	50.3	Mannan endo-1,6-alpha-mannosidase DCW1 (EC 3.2.1.101) (Defective cell wall 1) (Endo-alpha-1->6-D-mannanase DCW1) (GPI-anchored protein 51)	0.672412	-0.863198	1.29922	-0.236386	0.871878	0.92914	0.6713	0.963124	222	0	198	207	138	446	204	160
C2_01370C	C2_01370C	Q5ALY5	72.3	Uncharacterized protein	0.642676	0.567378	0.678597	0.603299	0.00615071	0.0429981	0.00321414	0.0113022	3947	4222	6942	7455	5410	7943	10299	12958
C2_01380W	PLB4.5	A0A1D8PGF0	77	Lysophospholipase (EC 3.1.1.5)	0.377179	-2.70345	1.09032	-1.9903	0.788904	0.0048941	0.274598	0.0280627	20247	20582	27336	32395	9160	85135	8142	7851
C2_01390W	C2_01390W	A0A1D8PGB7	59.9	Epsin	-0.420546	-0.393057	0.860746	0.888235	0.512286	0.715717	0.0989001	0.0923082	324	229	218	249	457	563	384	537
C2_01400C	ESC4	Q5ALY1	102.7	Esc4p	-5.50205	-0.460477	-4.88733	0.154241	0.000350155	0.950657	0.00168353	0.965075	261	33000	558	276	477	653	374	596
C2_01420C	C2_01420C	A0A1D8PGB8	61.7	Uncharacterized protein	0.456634	0.400121	0.0644745	0.00796111	0.596863	0.808168	0.949706	1	532	1106	1758	821	909	792	1328	1370
C2_01430W	APT1	Q5ALX8	20.9	Adenine phosphoribosyltransferase (APRT) (EC 2.4.2.7)	0.166166	0.374581	-0.872559	-0.664143	0.422238	0.0658512	7.73701e-09	2.57978e-05	34290	42451	50522	46945	20047	22166	33663	31352
C2_01440C	C2_01440C	A0A1D8PGE0	10.3	Dynein light chain	0.112755	0.600313	0.144555	0.632113	0.652641	0.00156845	0.50716	0.000254394	24496	25096	28794	31716	24469	31170	45305	54446
C2_01470W	SSN2	Q5ALX5	186.5	Mediator of RNA polymerase II transcription subunit 13 (Mediator complex subunit 13)	8.22659	-0.302401	9.95708	1.42809	5.64622e-06	0.942919	2.00938e-08	0.178141	0	0	55	69	184	183	127	230
C2_01480W	SPT5	Q5ALX3	105.8	Transcription elongation factor SPT5 (Chromatin elongation factor SPT5)	1.88519	-0.00268065	1.77145	-0.116417	3.50489e-46	1	8.68505e-41	0.550626	10743	11798	52598	42082	32710	45692	44850	47209
C2_01530C	C2_01530C	Q5ALW6	81.1	Glutamine-dependent NAD(+) synthetase (EC 6.3.5.1) (NAD(+) synthase [glutamine-hydrolyzing])	0.11226	0.734922	0.316359	0.939021	0.904236	0.319272	0.613997	0.0703566	766	779	1026	871	584	1424	1943	1894
C2_01540W	C2_01540W	A0A1D8PGE7	43.7	TauD domain-containing protein	2.87606	1.07726	1.46361	-0.335189	4.30152e-16	0.0160992	0.00010101	0.496109	329	318	2302	3036	705	1125	2494	2013
C2_01550W	SMP2	Q5ALW4	88.1	Phosphatidate phosphatase	-1.72563	0.101652	-1.82934	-0.00205878	8.40701e-14	0.919452	2.14117e-15	1	15628	13776	4626	5402	3548	4888	5753	4885
C2_01580W	REX2	A0A1D8PGG3	27.7	Rex2p	1.48243	0.279537	0.416639	-0.786259	0.279075	0.967436	0.800426	0.608948	395	55	517	900	205	424	425	458
C2_01590W	COX13	Q5ALV9	15.9	Cytochrome c oxidase subunit 6A, mitochondrial (Cytochrome c oxidase polypeptide VIa)	1.23055	0.326366	1.64547	0.741296	9.626e-07	0.479671	1.95167e-11	0.0066975	16412	14984	47008	36903	54406	43213	73606	74123
C2_01600C	CDC55	Q5ALV8	59.1	Protein phosphatase PP2A regulatory subunit B	-1.9946	-0.82288	-0.268714	0.903005	0.0924748	0.74798	0.867211	0.517815	650	849	78	334	264	1056	349	495
C2_01610C	RPS26A	Q5ALV6	13.6	40S ribosomal protein S26	0.27967	0.217045	-0.00980727	-0.0724328	0.448314	0.752941	0.987587	0.876809	22271	20250	35673	23383	16283	27142	30911	27925
C2_01620W	COX4	Q5ALV5	17.3	Cytochrome c oxidase subunit IV	0.916506	-0.284644	-0.234204	-1.43535	1.76433e-10	0.19513	0.177507	4.17048e-24	98882	119325	239574	226498	85831	101622	96528	85643
C2_01640W	SLA1	Q5ALV2	138.8	Actin cytoskeleton-regulatory complex protein SLA1	-4.09684	0.0674044	-4.09704	0.0672064	1.39686e-60	0.967436	1.48622e-60	0.886644	122636	178266	10228	9649	9341	8158	10151	11909
C2_01670C	STT3	Q5ALU8	85.1	Dolichyl-diphosphooligosaccharide--protein glycosyltransferase subunit	-0.447621	1.59287	-1.45897	0.581518	0.668997	0.0862326	0.0566971	0.539106	935	1059	953	712	312	426	599	2044
C2_01680C	C2_01680C	A0A1D8PGH2	87	FYVE-type domain-containing protein	-0.362139	-0.182047	-1.71754	-1.53745	0.54389	0.919452	6.78706e-05	0.000552611	4756	8349	5268	6180	1396	2711	2147	2047
C2_01690W	C2_01690W	Q5ALU6	19.5	Uncharacterized protein	-0.245463	0.365883	0.690597	1.30194	0.710402	0.711911	0.158338	0.00375113	1747	1510	1772	1360	3172	2002	3651	4490
C2_01720C	C2_01720C	Q5ALU3	15.7	COX assembly mitochondrial protein	-0.10837	-0.196571	-0.609659	-0.69786	0.956255	0.967436	0.544071	0.492067	1869	2009	2812	1331	474	2239	1337	1320
C2_01730W	SPC24	Q5ALU2	29.1	Probable kinetochore protein SPC24	-1.84652	0.160604	-1.32923	0.677891	3.69886e-09	0.887761	3.59942e-05	0.063054	1173	1130	420	310	469	450	561	669
C2_01740C	C2_01740C	Q5ALU1	13.7	54S ribosomal protein L31, mitochondrial	-1.25285	1.82545	-2.43438	0.643917	0.0386962	0.0041889	8.26477e-06	0.352599	973	1428	641	503	166	290	1216	658
C2_01750C	C2_01750C	Q5ALU0	18.6	Uncharacterized protein	0.747572	-0.364248	1.18713	0.0753055	0.0819426	0.632363	0.00217779	0.91011	110	123	228	215	232	307	239	255
C2_01780W	MSB2	A0A1D8PGF8	141	Msb2p	0.835086	0.206373	0.265154	-0.363559	0.0109853	0.805549	0.505464	0.347279	1455	1466	2548	3309	1523	2049	2650	2198
C2_01820C	SNU71	Q5AM84	70.5	U1 small nuclear ribonucleoprotein component SNU71	-0.764278	3.52604	-2.94329	1.34703	0.821127	0.218792	0.18804	0.617046	224	312	165	190	64	0	330	635
C2_01830W	PRP39	A0A1D8PGF5	76.4	Prp39p	-0.244207	0.382932	-0.854539	-0.227399	0.72288	0.709135	0.0821242	0.728811	336	303	275	333	152	208	302	250
C2_01840C	RAD7	A0A1D8PGH5	73.5	UV-damaged DNA-binding protein	7.03561	0.220273	9.56042	2.74508	0.0392777	0.996933	0.00271882	0.423075	0	0	0	52	114	170	190	198
C2_01850W	RAD23	A0A1D8PGE3	43.7	Rad23p	0.218677	0.269626	-0.73404	-0.683091	0.359566	0.385404	7.5975e-05	0.000331939	10403	9499	13317	12920	4939	7296	8947	8345
C2_01860C	UTR4	Q5AM80	29.8	Enolase-phosphatase E1 (EC 3.1.3.77) (2,3-diketo-5-methylthio-1-phosphopentane phosphatase)	0.240634	-0.419842	0.862877	0.202401	0.715938	0.629171	0.0647902	0.754527	881	506	915	944	1231	1318	1073	1197
C2_01890W	CTF1	A0A1D8PGH7	127.9	Ctf1p	-2.38844	-0.692257	0.585323	2.2815	0.381093	0.942919	0.854893	0.394714	66	267	0	68	193	316	113	257
C2_01900C	C2_01900C	A0A1D8PGI1	57.2	Uncharacterized protein	0.399668	0.834581	-0.169171	0.265742	0.502008	0.188167	0.795958	0.673818	1098	881	1794	1194	623	1199	1623	2153
C2_01910W	C2_01910W	A0A1D8PGI6	29.4	Uncharacterized protein	-1.79584	0.105331	-0.109479	1.79169	0.541424	1	0.979707	0.534793	83	78	0	50	99	46	81	112
C2_01920C	C2_01920C	Q5AM72	97.4	Patatin-like phospholipase domain-containing protein CaO19.1504 (EC 3.1.1.-)	-0.133728	-0.446031	-0.489123	-0.801426	0.896874	0.71382	0.454477	0.193441	373	568	475	492	383	279	307	281
C2_01970C	ROD1	A0A1D8PGG1	99.4	Rod1p	-2.00896	-0.862024	1.53214	2.67908	0.455004	0.915978	0.5629	0.275483	122	29	45	0	181	269	155	135
C2_01980C	SRD1	A0A1D8PGG7	67.4	Srd1p	-0.403116	-0.203558	-1.78578	-1.58622	0.0559617	0.585402	3.58063e-24	1.42883e-18	57252	73916	54590	57309	17717	20681	20654	18854
C2_01990C	FAB1	A0A1D8PGH4	295.8	1-phosphatidylinositol-3-phosphate 5-kinase	-1.61375	0.103109	-0.682161	1.0347	0.00145695	0.972562	0.241203	0.0597017	4521	4615	2023	1386	3629	1929	3194	4151
C2_02000W	C2_02000W	A0A1D8PGG5	38.5	Uncharacterized protein	2.40759	-1.33475	5.36415	1.62182	0.295254	0.779652	0.00507308	0.508991	94	0	395	187	852	3312	727	1143
C2_02020W	C2_02020W	A0A1D8PGI9	89.6	Ubiquitin carboxyl-terminal hydrolase (EC 3.4.19.12)	0.467697	0.258807	-0.0500373	-0.258927	0.00199809	0.244254	0.820841	0.122664	47086	51866	74263	80157	42035	55053	65745	71344
C2_02030W	ARO3	A0A1D8PGI8	40.6	Phospho-2-dehydro-3-deoxyheptonate aldolase (EC 2.5.1.54)	-0.349943	0.700796	-0.886906	0.163834	0.311147	0.0434199	0.00166522	0.684434	16156	14550	13227	14009	6137	10991	17107	15240
C2_02040W	C2_02040W	A0A1D8PGI3	123	Uncharacterized protein	-6.81324	8.69444	-6.64482	8.86286	0.30892	0.299545	0.300251	0.15263	0	37	0	0	0	0	67	115
C2_02100W	SNF2	A0A1D8PGK4	193.4	SWI/SNF catalytic subunit	-0.0400437	0.214546	-0.447925	-0.193335	0.978908	0.876843	0.388035	0.763347	114466	140468	136957	142895	119562	62507	129319	130310
C2_02120W	C2_02120W	Q5ALP7	40.4	RNA polymerase specificity factor	0.0385545	-0.141891	0.828757	0.648311	0.923851	0.76626	7.86366e-06	0.000842237	3840	3855	4874	4106	6996	6697	7068	7792
C2_02150C	RNA14	Q5AM44	91.6	mRNA 3'-end-processing protein RNA14	-1.64841	-0.00711494	-1.42274	0.218556	0.179863	1	0.242451	0.907289	570	146	84	172	106	170	193	127
C2_02170W	C2_02170W	A0A1D8PGJ8	53.1	Uncharacterized protein	0.75009	1.13893	-0.111487	0.277355	0.206622	0.0804523	0.886659	0.699393	541	871	1571	1130	740	551	1432	2017
C2_02190C	EDC1	Q5ALP1	28.9	Enhancer of mRNA-decapping protein 1	-2.1664	0.885876	0.835551	3.88783	0.613803	0.952975	0.854233	0.28642	502	0	0	122	529	367	880	1134
C2_02200W	ZRC1	A0A1D8PGL8	52.5	Zn(2+) transporter	0.674456	0.515788	0.346344	0.187676	0.035578	0.242066	0.332511	0.649451	537	461	893	910	567	722	1175	999
C2_02210C	TLG2	A0A1D8PGJ1	49.3	Tlg2p	-1.40172	8.21469	-9.23216	0.384254	0.866559	0.259471	0.0790785	0.974247	129	90	99	0	0	0	128	0
C2_02220C	C2_02220C	A0A1D8PGJ3	45.3	Uncharacterized protein	1.27299	-0.108341	-0.0138283	-1.39516	0.705394	1	0.999884	0.654974	0	246	302	359	113	130	148	119
C2_02240C	HEX3	Q5ALN5	68.1	SUMO-targeted ubiquitin ligase complex subunit	-0.383738	-0.233702	0.0799704	0.230006	0.706895	0.940536	0.942944	0.829585	317	487	397	303	549	277	401	464
C2_02250C	OPI1	A0A1D8PGK8	47.8	Transcriptional regulator	-11.4847	0.622801	-0.45576	11.6517	3.51873e-12	0.662922	0.608525	4.31922e-12	337	597	0	0	302	387	485	772
C2_02260W	C2_02260W	Q5ALN3	29.8	Uncharacterized protein	0.110491	0.408467	-0.661369	-0.363392	0.774764	0.249144	0.00625969	0.183602	2601	3118	3275	3682	1548	2131	2831	2917
C2_02270C	C2_02270C	Q5ALN2	17.3	Mitochondrial 37S ribosomal protein MRPS8	-0.33868	-0.146738	-0.280728	-0.0887863	0.229273	0.822764	0.317318	0.809795	8528	10129	8806	7912	6439	9217	7046	9605
C2_02280W	AIM36	Q5ALN1	34.7	Altered inheritance of mitochondria protein 36, mitochondrial (Found in mitochondria protein 39)	-0.47547	0.28167	-1.22646	-0.469316	0.0740555	0.521167	8.14212e-08	0.0763491	7215	9483	6452	7080	3072	4181	4858	5533
C2_02310W	C2_02310W	A0A1D8PGJ9	29.3	Uncharacterized protein	0.126987	0.0759668	-0.142617	-0.193637	0.474985	0.845993	0.381687	0.219618	16497	16927	23589	17981	13917	16732	19024	19231
C2_02320C	CPR3	Q5ALM6	21	Peptidyl-prolyl cis-trans isomerase (PPIase) (EC 5.2.1.8)	0.628625	-1.26167	0.111813	-1.77848	0.455038	0.16328	0.915042	0.00830339	13353	16305	23948	27673	6163	27987	9042	6927
C2_02340C	ENT3	A0A1D8PGL6	48.5	Ent3p	-0.471232	-0.244973	-0.590286	-0.364027	0.507222	0.896436	0.351675	0.616524	4034	4066	3169	3428	1405	4259	2942	2493
C2_02350C	SAC3	A0A1D8PGL7	139.1	Sac3p	-0.824923	-0.636526	1.04602	1.23442	0.895757	0.973629	0.823882	0.80294	204	0	139	0	152	289	165	164
C2_02370C	HOM2	Q5ALM0	39.2	Aspartate-semialdehyde dehydrogenase	0.245144	0.610926	0.716673	1.08246	0.648792	0.276826	0.0733332	0.00465837	7615	13062	14893	12842	18456	15240	26943	35183
C2_02380W	POB3	Q5ALL8	60.9	FACT complex subunit POB3 (Facilitates chromatin transcription complex subunit POB3)	-0.584284	-0.104086	-0.338864	0.141334	0.033748	0.919452	0.257971	0.700768	3844	3025	2560	2628	2565	2929	2731	3345
C2_02410W	C2_02410W	A0A1D8PGL1	21.4	Bap31 domain-containing protein	-1.23463	-0.0640485	-0.84943	0.321151	1.0137e-07	0.964155	0.000434017	0.268998	24278	22487	11709	10830	9747	16989	13998	15807
C2_02420C	DUS3	Q5ALL3	69.6	tRNA-dihydrouridine(47) synthase [NAD(P)(+)] (EC 1.3.1.89) (tRNA-dihydrouridine synthase 3)	-1.60403	1.40316	-2.25994	0.747243	0.153308	0.370056	0.0255548	0.562873	1291	2266	700	623	430	301	1972	349
C2_02430W	UTP21	A0A1D8PGP2	103.8	rRNA-processing protein	0.611952	0.799479	-0.188609	-0.0010815	0.324381	0.300129	0.798181	1	2939	2770	7001	3073	2395	2660	6484	3932
C2_02440W	C2_02440W	A0A1D8PGN0	118.6	CNH domain-containing protein	-0.853855	-0.390661	-0.845975	-0.382782	0.192505	0.787761	0.180471	0.617387	599	847	502	406	247	590	366	368
C2_02450C	UTP22	A0A1D8PGM4	133.6	U3 small nucleolar RNA-associated protein 22	-1.2474	0.541642	-2.48915	-0.700116	1.90858e-09	0.0503551	1.78541e-35	0.00195183	9003	10976	4861	4658	1690	1897	3405	2787
C2_02460W	ERG7	Q04782	83.7	Lanosterol synthase (EC 5.4.99.7) (2,3-epoxysqualene--lanosterol cyclase) (Oxidosqualene--lanosterol cyclase) (OSC)	-1.73317	-0.0489803	-0.778589	0.9056	0.000786609	0.99363	0.181609	0.117772	809	755	250	281	547	351	493	565
C2_02500W	C2_02500W	A0A1D8PGL0	66.5	TAFII55_N domain-containing protein	0.0880273	0.707536	-0.804298	-0.184789	0.988973	0.834822	0.611962	0.934891	180	76	129	178	114	26	127	162
C2_02510W	PRS1	Q5ALK3	35	Ribose phosphate diphosphokinase subunit	1.19719	-23.9757	0.720609	-24.4522	0.805532	4.24535e-14	0.869416	3.16509e-15	114	178	363	391	0	531	0	0
C2_02540W	C2_02540W	A0A1D8PGR5	193.2	Uncharacterized protein	-0.388053	-0.592515	0.143611	-0.0608504	0.18359	0.0590691	0.672302	0.8851	6593	6124	6400	4686	5541	8875	5377	5803
C2_02590W	ZRT2	A0A1D8PGN5	41.2	Low-affinity Zn(2+) transporter	2.08494	1.20247	-0.25862	-1.14109	0.0411664	0.462083	0.855279	0.319683	142	165	828	653	196	48	298	411
C2_02620W	C2_02620W	A0A1D8PGP5	15.6	Uncharacterized protein	0.416427	-0.300709	-0.452481	-1.16962	0.0654086	0.367759	0.037481	2.96738e-09	7382	7588	10469	12051	4705	6434	5480	5160
C2_02640C	BNA32	A0A1D8PGM8	51.3	Aminotran_1_2 domain-containing protein	0.945931	0.406623	1.22045	0.681142	0.0109853	0.532294	0.000564184	0.0809751	371	543	1052	941	1058	1077	1477	1906
C2_02660W	C2_02660W	Q5A0H0	29.2	Uncharacterized protein	11.8908	-2.43541	14.0888	-0.237368	1.1729e-11	0.0272861	4.19031e-16	0.875995	0	0	786	794	1052	5824	758	661
C2_02670C	C2_02670C	A0A1D8PGQ1	18.7	Uncharacterized protein (Fragment)	3.53348	0.367168	4.09091	0.924594	0.192505	0.98085	0.106723	0.793141	18	44	851	0	561	487	805	820
C2_02690W	SER2	Q5A0H3	33.3	Phosphoserine phosphatase	-0.384201	-0.294371	0.973932	1.06376	0.159438	0.462083	1.56916e-05	3.00145e-06	1538	1324	1398	1100	2560	3142	2916	2579
C2_02710C	C2_02710C	Q5A0H6	32.2	Uncharacterized protein	-0.739083	0.213249	0.490365	1.4427	0.341686	0.942859	0.536996	0.0299518	618	332	382	270	781	542	1052	806
C2_02720W	C2_02720W	A0A1D8PGN9	114.3	Importin N-terminal domain-containing protein	-1.05088	-0.464451	-0.44009	0.146338	0.00100621	0.367882	0.230587	0.760499	2918	4014	1786	1982	2069	3149	1992	2445
C2_02730W	C2_02730W	Q5A0H8	40.4	Polyubiquitin-binding protein	-0.1881	0.0511025	-0.507762	-0.26856	0.763016	0.982804	0.264378	0.613757	3714	4156	4552	3320	3010	2495	4150	2697
C2_02740C	HPT1	A0A1D8PGN7	24.2	Hypoxanthine phosphoribosyltransferase	-0.0991073	-0.336178	-0.556296	-0.793366	0.707271	0.173112	0.00151057	3.32211e-06	7272	7704	8808	7091	4955	5297	5101	4558
C2_02760W	LHS1	A0A1D8PGU0	104.7	Hsp70 family chaperone	0.299067	0.00363581	0.649614	0.354183	0.121687	1	8.55049e-05	0.0536592	4370	3952	6020	5593	6387	6762	7346	8369
C2_02770W	C2_02770W	A0A1D8PGR8	81.9	RRM domain-containing protein	-0.764762	0.544182	-0.416447	0.892497	0.181143	0.554466	0.498468	0.0999592	2812	2677	1879	1782	2621	1396	3226	3977
C2_02810C	NCB2	Q5A0I6	16.9	Negative cofactor 2 transcription regulator complex subunit	1.09466	-0.575908	1.0863	-0.584273	0.0380036	0.517479	0.0359108	0.328259	841	1328	2742	2496	2806	1702	1846	1847
C2_02830C	SGT2	Q5A0I8	36.4	Sgt2p	0.484218	-0.317683	-0.146236	-0.948138	3.13262e-07	0.00465669	0.195272	4.85057e-25	43987	49636	78218	70236	37665	48160	39551	41789
C2_02870W	C2_02870W	A0A1D8PGS6	21.8	Trafficking protein particle complex subunit BET3	2.45559	0.508812	3.79906	1.85228	0.000359615	0.76626	6.03145e-09	0.0102029	118	257	1508	842	3390	1666	3823	5058
C2_02930C	ETT1	Q5A0J9	48.2	Enhancer of translation termination 1	-0.443309	-0.480407	0.351024	0.313926	0.307853	0.418284	0.415676	0.494951	1452	1522	1512	988	1893	1916	1864	1387
C2_02940W	MET1	A0A1D8PGS2	61.5	Uroporphyrinogen-III C-methyltransferase	-0.382464	0.107903	-0.668036	-0.177669	0.0838913	0.856257	0.000731699	0.490875	6432	7178	6279	5561	4393	4181	5680	5373
C2_02970C	ALD5	A0A1D8PGT5	54	Aldehyde dehydrogenase (NAD(P)(+))	-0.664804	0.0655089	0.456207	1.18652	0.0172971	0.967436	0.121863	4.90052e-06	68490	71804	58248	42631	71171	127163	110602	131088
C2_02980C	DLD1	A0A1D8PGR9	64.4	Dld1p	0.0422832	-0.0744843	-0.292429	-0.409196	0.930975	0.942919	0.275341	0.108071	6191	6303	8329	6326	5334	4863	5761	5853
C2_02990C	HYU1	A0A1D8PGR6	141.9	5-oxoprolinase	0.703675	0.229563	0.699561	0.225449	8.65679e-06	0.388047	9.55076e-06	0.239036	2531	2479	5040	4233	3451	4845	5722	5715
C2_03000C	TSR3	A0A1D8PGR1	38.9	Ribosome biogenesis protein TSR3	0.806278	0.0374655	1.20782	0.43901	0.00331321	0.981527	2.94825e-06	0.148224	853	1046	1999	1765	1806	2671	2398	3001
C2_03010C	RNR21	Q5A0L0	47.4	Ribonucleotide-diphosphate reductase subunit	-0.0360456	0.168649	0.473394	0.678088	0.92546	0.662922	0.0119576	0.000204637	6519	5517	6915	6406	7740	9186	10269	12302
C2_03020C	C2_03020C	Q5A0L2	76.5	Uncharacterized protein	-0.318775	2.91374	-1.79143	1.44108	0.671755	1.34778e-08	0.000502931	0.00639733	286	328	305	254	106	69	766	836
C2_03040W	PLC2	Q5A0L4	33.6	Plc2p	-0.287675	-0.405265	1.14055	1.02296	0.281194	0.195257	3.7571e-08	1.5942e-06	3473	2711	3126	2639	6458	7330	6311	6045
C2_03050W	SHE9	Q5A0L7	60.7	Sensitive to high expression protein 9 homolog, mitochondrial	-0.332783	-0.298664	0.0844054	0.118525	0.559196	0.779453	0.899659	0.862161	1559	1648	1734	1174	1989	1366	1613	1701
C2_03060W	PR26	Q5A0L8	45.9	Proteasome regulatory particle base subunit	0.162288	0.0311137	0.118033	-0.0131418	0.814721	0.99699	0.842362	0.992205	7188	8071	11236	8221	10056	6198	9078	11224
C2_03080W	IDH2	A0A1D8PGS5	39.8	Isocitrate dehydrogenase [NAD] subunit, mitochondrial	-0.332497	0.32955	-0.494927	0.16712	0.164057	0.295487	0.0204815	0.539745	39439	46328	38546	38439	31625	29178	43083	48585
C2_03090C	ADE8	A0A1D8PGS7	24.4	Phosphoribosylglycinamide formyltransferase	0.0827939	-0.823038	0.502432	-0.4034	0.942169	0.281984	0.412597	0.546047	523	531	665	601	465	1091	461	552
C2_03100W	EFT2	Q5A0M4	93.3	Elongation factor 2 (EF-2)	-0.306853	-0.245697	0.561338	0.622494	0.0679693	0.294359	0.000176609	3.56679e-05	182701	156447	171879	140219	220922	288178	244445	262323
C2_03130W	C2_03130W	A0A1D8PGT0	23.6	Protein-arginine N-methyltransferase	0.468477	0.769002	-1.41874	-1.11821	0.525977	0.389861	0.0117134	0.0607367	6694	7820	11501	11211	2143	3419	2893	8269
C2_03140C	C2_03140C	A0A1D8PGT1	85.5	Putative carboxylic ester hydrolase	0.11165	0.800657	0.380479	1.06949	0.798883	0.00741667	0.20189	3.18337e-05	1540	1668	2365	1593	1763	2494	4219	4501
C2_03160C	RNR1	Q5A0N3	96.2	Ribonucleoside-diphosphate reductase (EC 1.17.4.1)	0.264383	0.0438131	0.266035	0.0454653	0.054352	0.940536	0.0473264	0.816537	9867	11238	14879	13830	11442	14274	14700	16665
C2_03170W	C2_03170W	Q5A0N4	28.2	Uncharacterized protein	-12.5184	-0.731582	-3.119	8.66785	1.33372e-11	0.806874	0.00623242	8.47778e-06	1348	547	0	0	46	187	90	68
C2_03180C	TOM1	A0A1D8PGT3	375.2	E3 ubiquitin-protein ligase	0.282037	0.584163	-0.907941	-0.605815	0.37563	0.0677365	0.000234046	0.0228495	46142	58517	63540	79406	27755	28190	47464	52703
C2_03200W	PRP3	Q5AH86	52	U4/U6-U5 snRNP complex subunit	-1.4459	10.6079	-11.5621	0.491698	0.0146402	4.53506e-10	7.39288e-13	0.506689	645	456	237	222	0	0	364	318
C2_03210W	C2_03210W	A0A1D8PGV8	8	Uncharacterized protein	0.264539	-0.337804	-0.103586	-0.705929	0.281896	0.270542	0.711973	0.000526606	10640	12066	15088	15714	10511	10704	9005	11055
C2_03220C	STP4	Q5AH87	42.4	Transcriptional regulator STP4	0.853333	5.1985	-4.29903	0.0461331	0.712327	0.0033447	0.00802184	0.993174	77	195	361	200	0	15	297	308
C2_03240C	ROM2	Q5AH90	156.9	Rho family guanine nucleotide exchange factor	-0.36405	0.070924	-0.888837	-0.453863	0.578018	0.981527	0.0867466	0.45568	958	1051	914	854	362	763	790	572
C2_03260W	C2_03260W	Q5AH92	26.3	PITH domain-containing protein	-0.72677	0.372271	-0.735564	0.363477	0.00145695	0.280219	0.00119899	0.160896	2133	2419	1548	1561	1167	1616	2237	1998
C2_03270W	GPM1	P82612	27.4	Phosphoglycerate mutase (PGAM) (EC 5.4.2.11) (BPG-dependent PGAM) (MPGM) (Phosphoglyceromutase)	0.443623	0.390109	-0.604701	-0.658216	0.0223167	0.112541	0.000967845	0.000352896	80365	81569	143775	107216	44549	64150	87234	79926
C2_03280W	NSP1	A0A1D8PGV7	74.6	FG-nucleoporin	-0.390523	-0.110913	-0.660223	-0.380613	0.0101379	0.757192	2.53181e-06	0.0131524	42595	50215	40635	39441	25183	34575	32145	32990
C2_03300W	HEM2	A0A1D8PGU4	37.1	Delta-aminolevulinic acid dehydratase (EC 4.2.1.24)	-0.0904424	-0.165065	0.670103	0.595481	0.895757	0.893694	0.0790713	0.131654	915	637	954	711	1182	1315	1267	1381
C2_03310C	VPS20	Q5AH99	25	ESCRT-III subunit protein	0.815672	0.21266	0.2166	-0.386412	0.0224062	0.814494	0.631112	0.352453	1954	2043	3738	4196	2609	1996	3033	3423
C2_03320W	CHK1	Q5AHA0	281.6	Histidine protein kinase 1 (EC 2.7.13.3)	-9.82803	8.52762	-9.6596	8.69605	0.0891941	0.278475	0.0869594	0.136334	155	140	0	0	0	0	159	0
C2_03330C	HOG1	Q92207	42.9	Mitogen-activated protein kinase HOG1 (MAP kinase HOG1) (EC 2.7.11.24)	0.235295	0.291067	-0.204468	-0.148696	0.692085	0.769251	0.711973	0.809795	2245	2177	2515	3334	1340	2632	2685	2949
C2_03350W	PGA17	Q5AHA4	59.5	Predicted GPI-anchored protein 17	-1.38153	-2.16553	4.65448	3.87049	0.00503798	1.77627e-06	1.82496e-29	1.35639e-18	144	125	59	58	3090	3780	1154	650
C2_03360W	C2_03360W	Q5AHA6	90.9	AMP deaminase	-0.897594	0.334412	1.82514	3.05715	0.7926	0.98085	0.474471	0.198922	134	85	0	127	328	466	661	513
C2_03380W	PAN1	Q5AHB1	152.3	Actin cytoskeleton-regulatory complex protein PAN1	0.236088	0.438329	-0.124074	0.078167	0.668997	0.521356	0.823232	0.907289	46365	49407	65743	62010	54098	32037	65551	77320
C2_03390C	HSP78	Q96UX5	91.6	Heat shock protein 78, mitochondrial	-0.0465927	0.0744647	-0.373222	-0.252165	0.905625	0.932343	0.0846938	0.291926	29625	38032	35717	38152	24617	28051	30386	35521
C2_03410W	C2_03410W	A0A1D8PGX7	113.7	Uncharacterized protein	0.607887	0.169398	-0.571324	-1.00981	0.00394733	0.719461	0.0066426	4.56875e-07	33946	40628	62557	65715	20673	30563	30908	36763
C2_03450W	C2_03450W	A0A1D8PGU5	47.7	Uncharacterized protein	-0.23558	-0.135921	0.244072	0.343731	0.824372	0.96966	0.786887	0.696636	154	95	142	100	133	167	150	173
C2_03460C	MGR1	Q5AHC2	41.5	Mitochondrial inner membrane i-AAA protease complex subunit MGR1	1.5452	0.563185	0.812693	-0.169327	5.94171e-05	0.374554	0.0548338	0.77667	428	308	1269	1171	497	834	1062	1235
C2_03470C	COX6	A0A1D8PH08	17.4	Cytochrome c oxidase subunit VI	0.434653	-0.790534	-0.247841	-1.47303	0.00115724	1.54428e-09	0.0880021	1.4539e-33	157591	164824	254898	238787	135327	137340	89784	98471
C2_03540W	RAD32	A0A1D8PGZ5	72.3	DNA-directed DNA polymerase eta	0.403146	0.623734	-0.0381433	0.182445	0.938668	0.961658	0.995073	0.974574	192	651	675	582	749	0	714	793
C2_03560C	C2_03560C	Q5AHD3	43.9	Mitochondrial 54S ribosomal protein YmL35	-2.11882	-0.0303183	-2.15184	-0.0633341	5.7148e-31	0.981527	6.69223e-32	0.846218	30481	34917	9209	7878	6151	8858	9399	7836
C2_03590C	CAP4	Q5AHD5	19.6	Cap4p	0.163275	0.00709168	0.844069	0.687886	0.797378	1	0.0350619	0.102849	1690	1969	2397	2242	3856	2617	3659	4255
C2_03640W	UGA11	Q5AHE2	48.6	Uga11p	-0.789915	-0.0568045	-1.57838	-0.845269	0.00154172	0.967989	1.071e-11	0.000777603	3188	3343	1994	2265	1079	1120	1314	1204
C2_03700W	C2_03700W	A0A1D8PGW9	42.6	Amidase	9.70713	-1.31928	10.2369	-0.789501	0.00411445	0.898827	0.00206998	0.86738	0	0	196	154	221	225	210	0
C2_03750W	YIM1	Q5AHE9	39.7	Yim1p	-0.997374	-0.0819493	-0.922338	-0.00691378	0.000205893	0.94899	0.000639642	0.99613	7145	8599	3968	4897	3397	5088	4646	4753
C2_03780C	C2_03780C	A0A1D8PGZ0	82.2	Phosphoprotein phosphatase	-2.09039	-0.308178	-1.32698	0.455235	0.0250027	0.940536	0.183422	0.721819	545	1233	109	349	309	408	365	317
C2_03790C	ASR3	A0A1D8PH00	13	Asr3p	-0.306805	-0.606417	0.57532	0.275707	0.149295	0.0030498	0.00178267	0.195443	75882	77907	69606	70960	118902	110281	88853	91582
C2_03800C	C2_03800C	A0A1D8PGY6	79.4	CASP_C domain-containing protein	-0.349127	0.508257	-0.296497	0.560887	0.600006	0.574064	0.642335	0.33433	2200	2200	2089	1832	2264	1238	2876	3238
C2_03810C	RPL21A	A0A1D8PGY0	18	Ribosomal 60S subunit protein L21A	-0.450594	-1.40373	0.254035	-0.699104	0.54389	0.0364256	0.746429	0.289629	26683	23491	21115	20488	13389	50126	13960	13159
C2_03820C	RPS9B	A0A1D8PGY8	21.7	Ribosomal 40S subunit protein S9B	0.688369	-0.201566	0.678209	-0.211726	2.41449e-05	0.505235	3.19878e-05	0.292698	2509	2999	5437	4634	4048	4865	4733	4440
C2_03840C	INO4	A0A1D8PH18	14.5	Ino4p	0.330921	0.157583	0.16163	-0.0117086	0.515696	0.917794	0.768022	0.992847	1542	2091	2049	3060	1816	2300	2713	2710
C2_03870W	GNA1	Q5AHF9	16.9	Glucosamine 6-phosphate N-acetyltransferase (EC 2.3.1.4)	-0.322092	-0.0186361	-0.34877	-0.0453137	0.107098	0.990109	0.0680826	0.876809	3795	3678	3248	3504	2644	3309	3493	3452
C2_03900C	C2_03900C	A0A1D8PGZ6	89	Uncharacterized protein	-1.73098	-0.0765265	0.483446	2.1379	0.536868	1	0.879249	0.411337	102	62	59	0	110	122	114	148
C2_03910C	C2_03910C	A0A1D8PH01	97.1	alpha-1,2-Mannosidase (EC 3.2.1.-)	23.677	-22.8376	22.4929	-24.0217	6.50907e-06	5.60535e-05	2.00855e-05	6.53606e-06	0	0	1304	0	0	533	0	0
C2_03930C	SNF6	A0A1D8PH05	56.1	Uncharacterized protein	0.494888	-0.356614	-0.0424789	-0.893981	0.203656	0.569482	0.938979	0.00966812	1435	1574	2224	2554	1578	1331	1423	1309
C2_03940C	SCH9	Q5AHG6	88.7	Serine/threonine-protein kinase SCH9 (EC 2.7.11.1)	-0.569083	-0.848641	0.714276	0.434719	0.511626	0.433445	0.351675	0.625287	176	98	108	102	206	251	127	174
C2_03950W	C2_03950W	Q5AHG8	31.4	Mitochondrial 54S ribosomal protein YmL24/YmL14	-0.162657	-0.466677	0.218097	-0.0859233	0.650948	0.18422	0.479637	0.825077	5404	5202	5543	5197	4682	8012	5393	5310
C2_03960W	RPL39	A0A1D8PH21	11.1	60S ribosomal protein L36	-0.453749	-0.198393	-0.355883	-0.100527	0.000426258	0.331088	0.00713311	0.562134	90255	95478	80115	73585	72278	73464	75931	75632
C2_03980C	MED1	Q5AHH0	69.7	Mediator of RNA polymerase II transcription subunit 1 (Mediator complex subunit 1)	0.386811	0.0585907	-0.494623	-0.822843	0.588872	0.988123	0.437105	0.16388	333	439	538	599	184	383	337	346
C2_03990W	GCD7	A0A1D8PH13	40.9	Translation initiation factor eIF2B subunit beta	-0.0617236	0.10718	0.416276	0.58518	0.921679	0.937513	0.234139	0.0792327	1201	1276	1489	1209	1785	1507	1986	2285
C2_04010C	HSP21	Q5AHH4	21.5	Small heat shock protein 21	0.769604	0.0473884	0.0764436	-0.645772	0.133786	0.990109	0.915337	0.216	1092	751	2041	1547	707	1303	1335	1074
C2_04020C	SDS22	Q5AHH6	43	Type 1 protein phosphatase-activating protein	1.53521	-0.476138	1.58132	-0.43003	0.0060078	0.688915	0.0040448	0.550971	3752	2378	10301	9879	4734	14651	7991	7861
C2_04030C	ACP12	Q5AHH7	12.3	Acyl carrier protein	0.323564	0.281135	-1.73301	-1.77544	0.470596	0.719399	9.27188e-08	6.90125e-08	6307	6612	7304	10804	1555	2425	2841	2818
C2_04040C	DCK2	A0A1D8PH14	200.5	Dck2p	-8.51142	0.275951	1.43898	10.2264	0.0131021	0.993524	0.714982	0.00233679	117	0	0	0	218	93	245	221
C2_04050C	DCK1	A0A1D8PH11	215.9	Dck1p	-0.765285	0.602421	-0.55965	0.808056	0.0216015	0.176688	0.106982	0.0149203	16390	18259	12126	10979	13674	9524	21201	21560
C2_04080W	C2_04080W	Q5AHI3	79.8	Uncharacterized protein	-0.859768	-0.210737	-2.91257	-2.26354	0.53746	0.973331	0.00569566	0.0425496	2294	3367	3341	332	366	389	384	393
C2_04100W	C2_04100W	A0A1D8PH25	43.7	Uncharacterized protein (Fragment)	-0.494451	0.151799	-0.695472	-0.0492221	0.515072	0.961901	0.297696	0.973573	230	231	150	217	111	181	193	186
C2_04120C	NOP12	Q5AHI7	51.6	Nucleolar protein 12	-0.969247	-0.564179	-0.873934	-0.468866	0.0458839	0.467092	0.0716942	0.406123	4574	4751	2836	2565	3093	1904	2393	1721
C2_04130W	C2_04130W	A0A1D8PH30	68	Rpd3L histone deacetylase complex subunit	0.485687	0.319866	0.0100841	-0.155737	0.000821005	0.091518	0.969091	0.389716	6088	6620	9782	10313	5971	6960	9284	9863
C2_04140W	CHS5	O74161	62.1	Chitin biosynthesis protein CHS5	-0.0859914	0.0715619	-0.302577	-0.145024	0.554467	0.800155	0.00569566	0.254239	12535	12730	14347	12665	9890	10753	12921	12881
C2_04150C	VMA7	A0A1D8PH17	13.1	V-type proton ATPase subunit F	0.436366	-0.113806	-0.434996	-0.985168	0.0426655	0.841752	0.0395548	3.52759e-07	6070	6534	10789	8608	3779	5757	5017	5311
C2_04160W	C2_04160W	Q5AHJ1	32	Uncharacterized protein	10.6586	-0.949871	11.0456	-0.562884	7.20906e-09	0.678052	1.79693e-09	0.711768	0	0	162	494	255	553	226	257
C2_04170C	C2_04170C	A0A1D8PH39	8.7	Uncharacterized protein	0.804455	-1.23981	0.518983	-1.52528	0.403634	0.273221	0.597191	0.0611789	5749	6732	12754	11924	2684	16533	4747	4315
C2_04190C	UGA1	A0A1D8PH55	52.6	4-aminobutyrate transaminase	1.63463	-1.34617	2.04859	-0.932212	0.0055005	0.0636562	0.000284356	0.152479	1276	999	3852	4138	2428	7504	2562	1872
C2_04200W	TBF1	Q5AHJ5	100.8	Transcription factor TBF1	-0.0566085	-1.97159	2.37426	0.459275	0.996029	0.159567	0.0233877	0.760499	1207	1182	1329	1273	1036	12457	1872	1915
C2_04220C	TAF14	A0A1D8PH31	29.1	TATA-binding protein-associated factor	-0.291669	0.532859	0.224634	1.04916	0.815662	0.768797	0.83445	0.21685	1463	2742	2535	1394	3442	1270	3929	4569
C2_04230W	BAT21	A0A1D8PH42	43.8	Branched-chain-amino-acid aminotransferase (EC 2.6.1.42)	1.21018	0.197487	0.370576	-0.642114	7.24514e-13	0.568325	0.0582011	0.000413834	2548	2187	6881	5590	2770	3443	4212	4211
C2_04240C	HYM1	Q5AHK0	39.2	Hym1p	0	-9.11292	8.85134	0	1	0.269403	0.147119	1	0	0	0	0	0	188	0	0
C2_04260W	SSN3	Q5AHK2	68.9	Serine/threonine-protein kinase SSN3 (EC 2.7.11.22) (EC 2.7.11.23) (Cyclin-dependent kinase 8)	0.223383	0.675839	-0.320624	0.131833	0.762066	0.365464	0.597191	0.860098	534	522	676	717	496	339	762	859
C2_04270W	CAK1	A0A1D8PH53	39.9	Cyclin-dependent protein kinase-activating kinase	0.325947	0.218605	-0.228766	-0.336108	0.761584	0.942919	0.81875	0.731671	113	139	147	207	75	147	136	164
C2_04280W	C2_04280W	A0A1D8PH46	81.1	Protein kinase domain-containing protein	1.01744	-0.476232	1.20544	-0.288233	0.00214531	0.367882	0.000175441	0.497932	1594	1802	4046	3741	2742	5354	3412	3330
C2_04300C	C2_04300C	A0A1D8PH47	29	Uncharacterized protein	9.19606	-1.17696	10.3269	-0.0461044	8.06385e-08	0.315284	1.10027e-09	0.982135	0	0	110	133	214	265	142	108
C2_04310W	ERG10	A0A1D8PH52	41.9	Acetyl-CoA C-acetyltransferase	0.0728268	0.286456	-0.315694	-0.102065	0.820062	0.322362	0.125213	0.700092	40318	42725	51469	47510	26517	41853	45997	51604
C2_04330C	C2_04330C	Q59TB0	38.2	Uncharacterized protein	-0.554782	-0.199905	-0.58634	-0.231463	0.627693	0.967436	0.575831	0.859671	192	166	170	109	62	189	127	122
C2_04340C	C2_04340C	Q59TB1	21.4	Gluconokinase (EC 2.7.1.12)	0.00338223	0.685589	0.424918	1.10713	1	0.94771	0.906426	0.734138	248	0	123	160	167	172	300	351
C2_04350C	SUV3	Q59TB2	81.8	ATP-dependent RNA helicase SUV3, mitochondrial (EC 3.6.4.13)	2.31542	0.410177	3.35416	1.44892	0.60453	0.984095	0.382561	0.761093	124	0	662	75	0	1421	1057	988
C2_04370W	C2_04370W	Q59TB4	46.5	Uncharacterized protein	0.00883702	0.0385205	-0.0291066	0.000576835	0.997985	0.967989	0.915042	1	5537	6558	7198	6586	5153	6893	7581	6988
C2_04380C	C2_04380C	A0A1D8PH56	57.8	Folylpolyglutamate synthase (EC 6.3.2.17) (Folylpoly-gamma-glutamate synthetase) (Tetrahydrofolylpolyglutamate synthase)	-0.446752	-0.434041	0.21806	0.230771	0.827306	0.93624	0.909462	0.912211	1349	108	614	609	909	801	643	881
C2_04460W	LYS22	Q59TC4	46.2	Lys22p	0.120111	0.139826	0.214301	0.234016	0.728263	0.818191	0.436181	0.406123	19891	19286	25513	22805	17206	29571	29744	30306
C2_04480W	C2_04480W	A0A1D8PH67	38	PKS_ER domain-containing protein	-3.24528	-2.05443	0.195036	1.38589	0.408152	0.797054	0.972199	0.760815	345	283	79	0	178	582	0	211
C2_04490W	C2_04490W	A0A1D8PH93	25.1	Uncharacterized protein	0.323229	0.21944	-0.0385288	-0.142318	0.212097	0.612416	0.913395	0.638518	10545	10375	14954	14675	10315	10116	12281	16211
C2_04500W	C2_04500W	A0A1D8PH70	213.9	DNA-binding ATPase	-0.390267	-0.340588	0.629387	0.679066	0.153853	0.370084	0.00905136	0.00543446	8792	8062	7832	6778	9958	16866	12257	12441
C2_04510W	RIM2	Q59TD1	44.4	Rim2p	0.251645	0.488649	-1.59631	-1.35931	0.505415	0.244108	1.82541e-09	6.83402e-07	7780	9064	11761	10946	2039	3700	4893	4461
C2_04520C	C2_04520C	Q59TD2	27.8	Uncharacterized protein	-0.439014	-0.100831	-1.51066	-1.17247	0.403634	0.967436	0.000168958	0.00583921	1554	1385	1106	1337	576	449	539	616
C2_04550C	NDH51	Q59TD5	53.8	NADH dehydrogenase [ubiquinone] flavoprotein 1, mitochondrial (EC 1.6.99.3) (EC 7.1.1.2)	0.235347	0.516885	0.185442	0.466981	0.535431	0.198412	0.618634	0.140427	10456	10979	16079	12634	13634	10541	19761	22071
C2_04570W	C2_04570W	A0A1D8PH72	48.8	Uncharacterized protein	-0.835214	-0.3352	-0.726488	-0.226473	1.22119e-34	1.71693e-05	2.72912e-26	0.00366461	34053	35993	23784	20770	19448	23398	19372	20863
C2_04580W	ERG20	A0A1D8PH78	40.7	Bifunctional (2E,6E)-farnesyl diphosphate synthase/dimethylallyltranstransferase	0.411495	0.318148	0.253865	0.160518	0.219381	0.54884	0.472787	0.692183	3171	3027	4326	4971	3050	4505	4710	6364
C2_04590C	QCR8	A0A1D8PHA2	11.1	Ubiquinol--cytochrome-c reductase subunit 8	0.0490688	0.501581	0.277223	0.729736	0.972882	0.567957	0.658427	0.166878	1239	920	1392	1152	1561	1021	2028	2427
C2_04600C	RPL17B	Q59TE0	21	Ribosomal 60S subunit protein L17B	-0.00172368	-0.359025	-0.0763214	-0.433623	1	0.184436	0.783687	0.0330537	27304	22339	30186	26186	19879	28218	22328	21728
C2_04620W	C2_04620W	A0A1D8PH73	109.2	Uncharacterized protein	-0.447622	-0.0708787	-0.976445	-0.599702	0.016027	0.923439	5.27503e-09	0.000824264	6435	7274	5472	5872	3323	3701	3988	3957
C2_04640C	SNU114	A0A1D8PH71	116.2	U5 snRNP GTPase	-0.46346	0	-8.82731	-8.61394	0.927008	1	0.00241988	0.00389609	74	92	47	87	0	0	0	0
C2_04650C	RPB4	A0A1D8PH80	30	DNA-directed RNA polymerase II subunit	-2.13904	-1.50078	-1.8219	-1.18363	1.21335e-07	0.00149127	8.85412e-06	0.00844178	2315	2378	568	634	473	898	321	240
C2_04680W	TIM17	Q59LI2	16.3	Mitochondrial import inner membrane translocase subunit TIM17	-10.5752	0.915774	-2.98839	8.50263	0.000828593	0.942919	0.356858	0.0102412	190	307	0	0	0	69	77	64
C2_04700C	C2_04700C	A0A1D8PH84	40.7	Uncharacterized protein	-11.0069	1.17441	0.0224151	12.2037	3.72974e-09	0.580388	0.99415	1.04696e-10	307	362	0	0	525	119	932	904
C2_04710C	URE2	Q96WL3	39.1	Protein URE2	-0.971799	0.0529702	-0.381002	0.643767	9.22701e-08	0.959335	0.06481	0.000893252	18473	15620	10627	9136	11098	15629	15098	17532
C2_04730W	C2_04730W	A0A1D8PH86	61.3	Uncharacterized protein	-0.303733	-0.742136	0.0851582	-0.353245	0.409502	0.0316318	0.839587	0.304241	63869	53575	52776	54885	44897	83919	42340	47123
C2_04760W	KIC1	Q59LK7	96.7	Putative serine/threonine protein kinase	1.5865	1.70902	-1.06693	-0.944399	0.108432	0.165332	0.302153	0.385839	167	510	1171	1117	218	93	542	719
C2_04780W	C2_04780W	A0A1D8PH76	93.5	Uncharacterized protein	-0.762667	0.113356	-0.660053	0.21597	0.210894	0.970553	0.275302	0.785425	493	650	509	264	307	429	415	523
C2_04790C	C2_04790C	A0A1D8PH91	41	Mitochondrial 37S ribosomal protein MRP51	-0.00642279	0.129724	-0.301306	-0.165159	1	0.854646	0.279878	0.610846	5532	6291	6968	6368	4292	5437	7189	5356
C2_04800C	MDM10	Q59LL4	53.1	Mitochondrial distribution and morphology protein 10 (Mitochondrial inheritance component MDM10)	0.0736354	-0.371684	-0.109085	-0.554404	0.988089	0.929799	0.94568	0.689356	134	99	224	62	80	143	85	116
C2_04820W	C2_04820W	A0A1D8PHA0	52.9	SpoU_sub_bind domain-containing protein	-0.242044	1.55688	-0.314907	1.48401	0.905625	0.343562	0.836617	0.220372	869	752	889	674	504	836	4057	488
C2_04850C	C2_04850C	A0A1D8PH89	47	SH3 domain-containing protein	0.138784	0.184086	0.66904	0.714342	0.835066	0.891879	0.117897	0.095022	6149	5216	7965	6291	5757	13079	12996	11619
C2_04870C	C2_04870C	A0A1D8PH99	183.6	Uncharacterized protein	-0.877964	-0.495526	0.517538	0.899976	2.67166e-08	0.0102793	0.00197022	1.98037e-08	10270	12258	7051	6814	15817	16591	13041	14369
C2_04880C	ARH2	A0A1D8PH88	27.8	NADPH-adrenodoxin reductase (Fragment)	-0.846241	2.66958	-1.89058	1.62524	0.225814	1.1957e-05	0.00151419	0.00811646	520	403	261	318	75	185	972	929
C2_04940C	ITR1	A0A1D8PH98	59.7	Myo-inositol transporter	0.539072	0.00720296	0.190167	-0.341702	0.534537	1	0.84091	0.709977	351	369	568	613	215	649	505	484
C2_04950C	CYT1	A0A1D8PHA3	32.2	Ubiquinol--cytochrome-c reductase catalytic subunit	0.381425	0.203289	0.302033	0.123898	0.266952	0.778028	0.378772	0.774555	5055	4212	6824	6848	4271	7510	7887	7900
C2_04960C	C2_04960C	A0A1D8PHE6	16.5	Uncharacterized protein	0.694486	-0.289379	-0.197485	-1.18135	0.0474998	0.678467	0.651988	0.000258073	3597	4747	7596	7651	3748	3523	4130	2977
C2_04980C	CKA2	Q59ZI9	38.5	Casein kinase 2 catalytic subunit	-0.256165	0.204212	0.688114	1.14849	0.769256	0.929799	0.27467	0.0476752	149	221	189	162	213	401	388	434
C2_05000C	MRPL10	Q59ZI7	31.9	Mitochondrial 54S ribosomal protein YmL10/YmL18	0.137356	0.285663	0.251689	0.399996	0.840722	0.773845	0.634198	0.423913	8241	5091	7650	8926	6610	9654	13614	9589
C2_05020W	C2_05020W	Q59ZI6	17.8	Uncharacterized protein	0.662496	-0.523723	0.312489	-0.87373	0.240965	0.557444	0.618634	0.095022	593	599	1188	958	469	1072	624	610
C2_05030C	RHO3	A0A1D8PH96	23.3	Rho family GTPase	3.43961	-0.382482	3.45048	-0.371614	4.47732e-22	0.621272	3.66904e-22	0.453726	797	626	9027	8494	5019	11191	6842	7495
C2_05060C	C2_05060C	Q59ZI2	14.8	Sulfiredoxin (EC 1.8.98.2)	-0.601147	-0.505766	-2.05699	-1.96161	0.418158	0.689528	0.000282907	0.000745859	1348	1710	969	1292	422	304	391	226
C2_05090W	MAK5	Q59ZH9	88	ATP-dependent RNA helicase MAK5 (EC 3.6.4.13)	0.509804	-0.309238	-0.225129	-1.04417	0.0753205	0.508779	0.487158	4.53632e-05	74817	92334	131230	137354	78102	63937	67159	71063
C2_05100C	ERF1	Q59ZH8	49.1	Translation termination factor eRF1	-0.0642251	-0.302955	0.0352359	-0.203494	0.888194	0.444057	0.926468	0.503226	10808	8508	10633	10317	8337	11891	10203	9042
C2_05110W	LEM3	A0A1D8PHB8	50.1	Lem3p	-0.926109	0.65859	-1.12677	0.457932	0.0220722	0.249394	0.00367292	0.32656	7467	7036	4480	4174	4013	2519	6172	6404
C2_05130W	C2_05130W	Q59ZH5	40.9	Uncharacterized protein	-0.391509	0.11496	-0.28527	0.221199	0.538292	0.967436	0.65555	0.753284	2116	2116	1554	2070	2104	1309	2134	2378
C2_05160C	C2_05160C	A0A1D8PHC4	75.4	PUM-HD domain-containing protein	-0.907114	-0.345844	0.406109	0.967379	9.71417e-05	0.362808	0.119491	3.52132e-05	1256	1350	822	753	1539	1965	1423	1839
C2_05170W	C2_05170W	Q59ZH1	25	4HBT domain-containing protein	-0.0377148	-1.47637	1.24275	-0.195912	1	0.371641	0.302153	0.914708	89	436	321	256	331	964	256	275
C2_05180W	WH11	A0A1D8PHF8	7	Wh11p	-0.029544	-0.894953	1.39279	0.527379	0.969361	0.00128156	5.72258e-09	0.0561531	66324	68607	74687	74833	132029	232896	123603	104454
C2_05190W	TMP1	P12461	36	Thymidylate synthase (TS) (TSase) (EC 2.1.1.45)	0.826269	0.0435519	1.12943	0.346715	0.0476732	0.988123	0.00372396	0.480141	356	271	684	581	536	874	866	831
C2_05200C	SGO1	A0A1D8PHC3	50.5	Sgo1p	-0.010284	2.28151	-2.12443	0.167371	1	0.558873	0.397731	0.974285	468	529	590	532	210	0	716	614
C2_05220C	C2_05220C	A0A1D8PHC5	117.8	Uncharacterized protein	0.0947441	-0.673425	0.356583	-0.411586	0.895757	0.203219	0.429143	0.364617	5341	6311	6624	7399	4937	10541	5272	5940
C2_05230C	RPF2	Q59ZG6	37.8	rRNA-binding ribosome biosynthesis protein	-0.351273	-0.563154	1.24764	1.03576	0.39299	0.225019	5.98792e-05	0.00144334	625	919	778	597	1701	1998	1467	1501
C2_05250C	AAT1	A0A1D8PHC9	48.9	Aspartate transaminase	0.0521228	-0.232213	-0.154378	-0.438714	0.880298	0.452912	0.49735	0.0221937	174356	173789	209980	198953	163651	149007	156991	162336
C2_05260W	BUD14	A0A1D8PHB1	91.4	Protein phosphatase regulator	1.00948	7.17006	-7.58112	-1.42054	0.916561	0.373082	0.17874	0.851231	69	0	88	72	0	0	0	64
C2_05270W	C2_05270W	A0A1D8PHD1	106.6	Uncharacterized protein	-0.377909	-0.103246	0.637532	0.912195	0.365787	0.945776	0.0748014	0.00815428	1379	1398	1318	1110	2419	1867	2302	2522
C2_05290C	C2_05290C	Q59ZG1	24.6	GOLD domain-containing protein	0.518939	-0.150645	1.21181	0.542221	0.692085	0.978763	0.230091	0.658748	184	280	425	330	198	947	660	495
C2_05300C	C2_05300C	A0A1D8PHE0	36.2	Mitochondrial 37S ribosomal protein MRPS35	0.0828373	0.30059	-0.139288	0.0784656	0.919708	0.760404	0.811974	0.91104	77437	66283	88203	84372	81851	45945	94501	98419
C2_05340C	RPC40	A0A1D8PHD8	38	DNA-directed RNA polymerase core subunit	-2.15962	-0.332041	-1.77052	0.0570601	9.10281e-12	0.626583	3.6914e-08	0.927415	18700	20584	5156	4803	6687	4679	5965	4978
C2_05360C	BIO32	Q59ZF3	53.8	Bio32p	1.98861	0.781654	0.400976	-0.805984	0.667423	0.967436	0.939346	0.876809	0	68	126	173	0	98	112	70
C2_05410W	C2_05410W	A0A1D8PHF5	13	Ribosomal 60S subunit protein L31B	0.0568956	-0.662623	-0.468474	-1.18799	0.940947	0.158085	0.225404	0.000436035	72848	96296	100750	98086	41184	85402	49571	42731
C2_05440W	PEX6	Q59ZE6	130.3	AAA family ATPase peroxin 6	1.75928	1.05597	1.00729	0.303977	0.01536	0.33073	0.202322	0.77117	307	132	711	966	308	610	960	1255
C2_05460W	CDC19	P46614	55.4	Pyruvate kinase (PK) (EC 2.7.1.40)	-0.607491	-0.333894	0.0855673	0.359165	0.00328938	0.278475	0.771245	0.112614	110123	102751	84744	73944	87812	144260	108291	106611
C2_05470W	COQ5	Q59ZE2	34.2	2-methoxy-6-polyprenyl-1,4-benzoquinol methylase, mitochondrial (EC 2.1.1.201) (Ubiquinone biosynthesis methyltransferase COQ5)	-0.376219	-0.416082	-1.52462	-1.56448	0.419417	0.547862	1.49961e-05	1.30548e-05	597	784	603	599	221	264	233	197
C2_05480C	C2_05480C	A0A1D8PHE3	9.6	Uncharacterized protein	0.0840271	-0.0874626	-0.109036	-0.280525	0.888631	0.956882	0.807569	0.477757	11264	11149	14782	12227	8268	13035	9053	14479
C2_05490W	C2_05490W	Q59ZE1	16.8	Uncharacterized protein	1.1024	0.0594221	-0.901882	-1.94486	0.153614	0.99533	0.245576	0.00480844	326	217	730	599	185	100	180	184
C2_05500W	ATP4	Q59ZE0	25.8	F1F0 ATP synthase subunit 4	-0.322295	0.501775	-0.370445	0.453625	0.533701	0.437478	0.429153	0.331362	109170	146255	114006	116551	119903	73786	176860	157581
C2_05510C	C2_05510C	Q59ZD9	49.3	WD_REPEATS_REGION domain-containing protein	0.276749	0.253657	-0.707296	-0.730388	0.836723	0.942919	0.465175	0.46373	450	229	305	614	231	184	325	271
C2_05520W	EFM4	A0A1D8PHH0	28.1	Protein-lysine N-methyltransferase EFM4 (EC 2.1.1.-) (Elongation factor methyltransferase 4)	0.854845	-1.07689	-0.102544	-2.03428	9.18836e-06	8.78082e-08	0.711973	3.2695e-28	3095	3228	6661	6292	2394	3629	1698	1647
C2_05530C	C2_05530C	A0A1D8PHF9	43.1	RanBD1 domain-containing protein	-1.19595	0.883086	-0.976191	1.10284	0.00748558	0.135694	0.0319661	0.015497	7644	9264	4383	3977	5345	3061	10257	8697
C2_05550W	C2_05550W	A0A1D8PHE5	14.9	Cytochrome b5 heme-binding domain-containing protein	0.703805	-1.23226	0.722633	-1.21343	0.197644	0.027389	0.167175	0.012753	7619	7115	14483	12767	6550	19022	6321	6087
C2_05560W	C2_05560W	Q59T49	37.3	Epimerase domain-containing protein	0.947536	0.311619	0.676478	0.0405602	0.00172393	0.586956	0.0320586	0.944831	892	1288	2564	2200	1455	2093	2673	2496
C2_05570C	C2_05570C	Q59T48	39.1	PKS_ER domain-containing protein	-5.52309	0.92935	-3.2287	3.22374	0.0139353	0.911283	0.184711	0.195875	349	6837	184	0	466	277	754	979
C2_05580W	C2_05580W	Q59T47	150.2	Uncharacterized protein	0.337328	0.549073	-0.572645	-0.3609	0.710938	0.670435	0.43726	0.671937	5757	9972	11975	10504	7268	2908	9247	9238
C2_05590C	C2_05590C	Q59T45	34.2	Putative amidotransferase	-0.437662	1.27365	-0.945169	0.766145	0.206622	2.82472e-05	0.00132288	0.012832	2569	2985	2244	2384	1388	1517	3415	4961
C2_05610C	RPS8A	Q59T44	22.7	40S ribosomal protein S8	-0.72135	0.311571	-0.0334346	0.999486	0.000708878	0.367628	0.923094	1.4538e-06	54435	53665	39051	35323	56663	48630	74602	82676
C2_05640W	C2_05640W	Q59T43	67.5	Uncharacterized protein	-0.341815	0.792655	-0.420927	0.713543	0.849714	0.751847	0.778914	0.611441	1212	1139	1158	952	1454	193	1793	1856
C2_05650W	VPS35	Q59T42	109	Vacuolar protein sorting-associated protein 35	-0.522428	0.196347	-0.977626	-0.258851	0.216239	0.854629	0.00760537	0.594208	1045	1576	996	1060	651	685	860	965
C2_05660W	PNG2	A0A1D8PHH2	111.8	Png2p	-0.44171	-0.37167	0.610699	0.680739	0.00355747	0.0413434	2.10668e-05	2.49321e-06	11255	10445	9832	8328	16334	17008	15360	15355
C2_05690C	YTH1	Q59T36	25.2	mRNA 3'-end-processing protein YTH1	-1.29026	0.716931	-1.97981	0.027375	1.15271e-06	0.0343981	1.32386e-14	0.96532	5648	7663	2878	3249	1658	1730	3456	3176
C2_05700W	OSM1	Q59T35	54.3	Fumarate reductase (EC 1.3.1.6)	-0.169805	0.0402476	0.936746	1.1468	0.807696	0.992971	0.0294776	0.00719765	2414	1317	1887	1880	2961	4365	4255	4587
C2_05710C	C2_05710C	A0A1D8PHH4	12.1	Ribosomal 60S subunit protein L33A	-0.278043	-0.0899831	-1.563	-1.37494	0.734065	0.978763	0.00340471	0.0130535	10102	9812	9613	9002	1831	5252	4695	2869
C2_05720C	C2_05720C	A0A1D8PHG1	48.3	Oxysterol-binding protein	0.404882	-0.129565	0.331559	-0.202888	0.204061	0.889494	0.297858	0.57582	6785	5713	9532	9225	5969	10229	8998	8243
C2_05740W	SPO7	Q59T32	57.8	Nem1-Spo7 phosphatase regulatory subunit	-0.891662	0.127396	-0.179761	0.839297	0.00100621	0.893637	0.614393	0.00243028	2107	2034	1328	1204	1957	1690	2367	2422
C2_05750W	C2_05750W	A0A1D8PHI7	48.5	Ribosome biogenesis protein NOP53	-0.261888	-0.0510441	0.212805	0.423648	0.467576	0.976138	0.545005	0.17941	5784	6363	6911	4657	7402	6652	7691	8602
C2_05760C	C2_05760C	Q59T30	13.1	Uncharacterized protein	0.291609	-0.0171733	0.142334	-0.166449	0.72545	1	0.860895	0.847777	1794	1251	2317	1929	2151	1137	1873	2121
C2_05780C	MKK2	A0A1D8PHG7	50.3	Mitogen-activated protein kinase kinase	-0.366088	-0.227246	1.34552	1.48436	0.547746	0.865364	0.0024913	0.000931266	131	141	111	127	315	385	305	404
C2_05790C	RFC1	A0A1D8PHI0	98.4	Replication factor C subunit 1	-0.0345737	-0.0644507	0.963386	0.933509	0.981353	0.979901	0.0170678	0.0235587	458	422	555	424	950	756	986	982
C2_05800C	C2_05800C	A0A1D8PHG9	51.6	GRIP domain-containing protein	-0.254467	-0.153782	-0.121367	-0.0206826	0.676857	0.932428	0.842057	0.98554	7041	6356	7620	5216	7430	4688	5970	7331
C2_05850C	COG6	Q59MF9	88.4	Conserved oligomeric Golgi complex subunit 6 (COG complex subunit 6) (Component of oligomeric Golgi complex 6)	-1.55991	-0.866635	-0.193078	0.500202	0.00102992	0.202499	0.7787	0.402297	569	909	277	288	603	700	341	509
C2_05890C	IDP1	A0A1D8PHH7	48.6	Isocitrate dehydrogenase [NADP] (EC 1.1.1.42)	0.0228286	0.166128	-0.103945	0.0393541	0.926151	0.382746	0.473998	0.831969	34540	32222	42222	34918	29108	33704	40119	43527
C2_05920C	COX8	A0A1D8PHJ3	10.9	Cytochrome c oxidase subunit VIII	0.177302	-0.0454499	0.635504	0.412752	0.689408	0.981527	0.0440161	0.237397	14456	9810	17630	13690	18926	19017	19538	24434
C2_05930W	COX9	A0A1D8PHI5	6.9	Cytochrome c oxidase subunit 7A (EC 1.9.3.1) (Cytochrome c oxidase polypeptide VIIA)	-0.357481	1.04214	-0.240473	1.15915	0.527539	0.0434292	0.673668	0.00792246	29904	35404	30624	27159	35046	18889	63363	73104
C2_05940C	VPS33	Q59MF4	80	Tethering complex ATP-binding subunit	-0.585544	-0.23632	0.106094	0.455319	0.894894	0.990109	0.981236	0.908731	176	183	285	0	183	207	200	193
C2_05980C	C2_05980C	A0A1D8PHJ4	37.5	Uncharacterized protein	-2.0403	-2.58611	1.24209	0.696285	0.753157	0.814494	0.837315	0.926306	259	0	76	0	189	459	122	0
C2_06080C	C2_06080C	A0A1D8PHM2	35	Nudix hydrolase domain-containing protein	0.203173	1.65014	-0.967702	0.47926	0.915663	0.231767	0.395943	0.726044	412	475	606	551	63	425	816	890
C2_06100W	PMT4	Q59X23	86.6	Dolichyl-phosphate-mannose--protein mannosyltransferase 4 (Protein mannosyltransferase 4) (EC 2.4.1.109)	-0.0338623	0.286074	0.688857	1.00879	0.990403	0.835063	0.221769	0.059075	1157	897	1287	1001	1000	2464	2344	2506
C2_06110W	C2_06110W	Q59X24	45.9	Exopolyphosphatase	0.186838	-0.422109	-0.99899	-1.60794	0.871878	0.797754	0.154756	0.0145159	3830	3423	4061	5227	1054	2748	992	2277
C2_06150C	RPN10	Q59X29	30.4	Proteasome regulatory particle base subunit	0.160405	-0.891281	1.22601	0.174325	0.998437	0.961564	0.79905	0.985186	73	0	0	89	85	89	49	63
C2_06170C	ECM17	A0A1D8PHL8	160	Sulfite reductase (NADPH) subunit beta	-0.0471313	0.0801216	-0.54514	-0.417887	0.89277	0.902993	0.00223848	0.026754	51269	63436	60813	64432	38093	40976	49344	50147
C2_06190W	ILV1	Q59P56	63.1	Threonine dehydratase (EC 4.3.1.19) (Threonine deaminase)	-0.0661535	0.155504	-0.121545	0.100112	0.936475	0.917794	0.824321	0.869662	2464	1757	2585	2015	1449	2556	2711	2477
C2_06200C	GUF1	Q59P53	73.8	Translation factor GUF1, mitochondrial (EC 3.6.5.-) (Elongation factor 4 homolog) (EF-4) (GTPase GUF1) (Ribosomal back-translocase)	1.28055	-0.0206093	1.50736	0.206208	0.688116	1	0.591397	0.966639	122	0	153	185	150	208	212	203
C2_06210C	SER1	Q59P52	43	Phosphoserine aminotransferase (EC 2.6.1.52)	-0.607849	-0.262603	-0.628208	-0.282963	2.34907e-05	0.225019	1.09443e-05	0.0834249	40110	41826	30463	30353	25800	27563	24319	28706
C2_06220C	MEC3	Q59P51	36	Checkpoint protein	-9.74159	8.66986	-9.57315	8.8383	0.0956427	0.272338	0.0931452	0.13185	102	177	0	0	0	0	0	181
C2_06240W	SMD2	A0A1D8PHP3	13	Small nuclear ribonucleoprotein Sm D2 (Sm-D2) (snRNP core protein D2)	0.0268947	0.1688	-0.604374	-0.462468	0.971746	0.787761	0.0153347	0.0810082	6213	6650	6690	8061	3695	4906	6089	5295
C2_06250C	CDC46	Q59P49	81.8	DNA helicase (EC 3.6.4.12)	-0.268419	0.077352	-0.119434	0.226337	0.364446	0.942919	0.714214	0.449336	4103	3511	4156	3058	3465	3590	4268	4611
C2_06260W	C2_06260W	Q59P48	19.6	RF_PROK_I domain-containing protein	-0.0307868	1.20976	-2.22928	-0.988735	0.991802	0.0458545	1.66128e-06	0.0519186	256	257	293	276	55	55	129	175
C2_06280C	C2_06280C	A0A1D8PHN4	46	Uncharacterized protein	0.309162	0.635573	-0.437237	-0.110826	0.618983	0.370084	0.413831	0.877958	741	958	1286	1101	733	504	1103	1232
C2_06290C	ATP14	A0A1D8PHL7	12	F1F0 ATP synthase subunit h	0.0445149	-0.730539	-0.202507	-0.97756	0.936475	0.0118095	0.522059	7.56444e-05	132762	160445	166591	174694	95558	166477	88374	95602
C2_06300W	YHC1	Q59P44	17.3	U1 small nuclear ribonucleoprotein C (U1 snRNP C) (U1-C) (U1C)	10.2273	2.06029	8.24904	0.0820369	1.09677e-06	0.388174	0.00012595	0.984445	0	0	261	239	58	54	488	65
C2_06310C	GSP1	Q59P43	24.3	GTP-binding nuclear protein	0.352952	-0.153352	0.678781	0.172476	0.0276368	0.602062	2.76306e-06	0.352453	34521	29038	49611	42681	47092	55977	55825	53935
C2_06320W	C2_06320W	Q59P41	122.1	Uncharacterized protein	2.74059	-0.065624	0.997553	-1.80866	1.09417e-12	0.98085	0.0219181	6.4949e-06	153	258	1683	1428	362	469	438	500
C2_06330C	AVT1	Q59P40	58.8	Avt1p	-0.671247	0.542092	-1.53349	-0.320155	0.468885	0.753826	0.0410359	0.762017	212	486	221	270	120	121	234	184
C2_06360C	MAK16	Q59P36	36.9	Protein MAK16	1.44829	-3.19131	1.67111	-2.96848	0.292856	0.0162274	0.192298	0.0121392	5492	5616	16103	18085	1526	37292	2534	2101
C2_06370C	SCP1	A0A1D8PHP1	22.2	Scp1p	0.491376	1.00888	-2.2885	-1.77099	0.613803	0.367881	0.000892732	0.0147251	1708	3005	3817	3660	676	250	1187	1131
C2_06390C	IMH3	Q59Q46	56.2	Inosine-5'-monophosphate dehydrogenase (IMP dehydrogenase) (IMPD) (IMPDH) (EC 1.1.1.205)	-0.328261	0.00915001	-0.369643	-0.0322318	0.162965	1	0.0944182	0.931781	21195	21722	20950	17873	12981	21108	19252	20838
C2_06420C	RTS1	Q59Q44	94.6	Serine/threonine-protein phosphatase 2A 56 kDa regulatory subunit	-1.1405	-0.596504	-1.07665	-0.53265	0.00046698	0.213541	0.00100291	0.157355	1326	1690	714	826	603	853	531	602
C2_06480W	TRM10	Q59Q39	37.7	tRNA (guanine(9)-N1)-methyltransferase (EC 2.1.1.221) (tRNA methyltransferase 10) (tRNA(m1G9)-methyltransferase) (tRNA(m1G9)MTase)	-1.15464	-0.420136	0.0291746	0.763678	9.51268e-06	0.315284	0.947618	0.00659789	2230	2350	1325	1017	1849	2941	1951	2239
C2_06490W	PNG1	Q59Q38	45.8	Peptide-N(4)-(N-acetyl-beta-glucosaminyl)asparagine amidase (PNGase) (EC 3.5.1.52) (Peptide:N-glycanase 1)	-1.87689	-8.74925	-3.41288	-10.2852	0.591006	0.0126133	0.241023	0.000691674	756	649	204	228	0	146	0	0
C2_06540C	SPF1	Q59Q34	136.9	Cation-transporting ATPase (EC 3.6.3.-)	0.419899	-0.170394	0.72988	0.139587	0.354643	0.893694	0.0601054	0.803188	6228	4151	7128	8550	6557	11196	8763	9634
C2_06590C	GIT1	Q59Q30	57.1	Glycerophosphoinositol permease 1 (Glycerophosphodiester transporter GIT1)	-1.28419	0.174454	-0.0503509	1.40829	0.731566	0.998478	0.993853	0.684434	202	0	47	48	96	103	48	222
C2_06630C	C2_06630C	A0A1D8PHQ3	7.6	Uncharacterized protein	0.498258	-0.172239	-1.12472	-1.79522	0.371546	0.927134	0.0136605	3.7451e-05	3546	3309	5111	5813	1130	2118	2084	1249
C2_06640C	VAS1	A0A1D8PHR0	127.5	Valine--tRNA ligase	-0.738019	0.158579	-0.0809562	0.815642	5.6594e-08	0.557021	0.678286	2.82892e-09	28710	34247	23382	19472	26724	33592	40828	38690
C2_06670C	DBF2	Q59KM8	82.3	Cell cycle protein kinase DBF2 (EC 2.7.11.1) (Dumbbell forming protein 2)	0.422698	-0.69961	0.802974	-0.319334	0.760037	0.726741	0.451815	0.812932	2999	4154	5870	4999	9970	1772	4192	5013
C2_06680W	FRP3	A0A1D8PHP8	30.9	Putative ammonium permease	-0.0759959	-0.0347225	-0.0427039	-0.00143045	0.837567	0.98085	0.902235	1	13656	13117	13871	14824	13462	12553	15756	14652
C2_06690C	PEX22	Q59KM6	23.4	Pex22p	0	0.0025628	9.64378	9.82613	1	1	7.92781e-06	7.34968e-06	0	0	0	0	130	169	157	197
C2_06720W	GRE2	A0A1D8PHQ6	38	Gre2p	0.653725	-0.410242	1.43465	0.370687	0.179092	0.621152	0.000498975	0.49189	1681	1999	3108	3419	3119	7236	4303	4666
C2_06730W	LSP1	Q59KV8	35.6	Lipid-binding protein	-0.479428	-0.0432158	-0.443678	-0.00746643	0.00584588	0.966347	0.0106476	0.9875	97024	102737	90572	72391	74725	72446	81730	89194
C2_06770W	C2_06770W	A0A1D8PHR2	45.5	Uncharacterized protein	0.0899959	-0.285991	-0.491223	-0.86721	0.917176	0.797754	0.329973	0.0607036	1666	1327	1957	1667	1099	1036	1291	798
C2_06790W	C2_06790W	Q59Z68	13.3	U2 snRNP complex subunit	-0.00595793	0.270802	-1.02266	-0.745899	1	0.573666	2.83399e-05	0.00380961	937	1118	1210	1108	448	578	673	790
C2_06810C	RPL11	A0A1D8PHW1	19.8	Ribosomal 60S subunit protein L11B	-0.61156	-0.182532	0.0844202	0.513447	0.00355747	0.681675	0.778365	0.0179189	131418	111189	96718	83773	134037	123471	130632	141536
C2_06820C	PRE2	Q59Z65	31.3	Proteasome core particle subunit beta 5	0.214849	0.30912	0.73551	0.829781	0.598781	0.577179	0.0146247	0.00594701	986	1050	1353	1321	1801	1581	2281	2759
C2_06850W	C2_06850W	A0A1D8PHS1	22.9	Uncharacterized protein	-0.143583	-0.863174	-0.394252	-1.11384	0.912664	0.433445	0.65555	0.128169	1464	2683	2218	2023	1162	2078	573	1513
C2_06860W	LTE1	A0A1D8PHR4	187.2	Mitotic regulator	-0.342868	-0.684533	0.396618	0.0549528	0.878752	0.837489	0.820237	0.987064	4632	5309	3716	5075	6973	6068	9168	449
C2_06870C	PST1	A0A1D8PHR5	21.3	Pst1p	-1.17117	-1.90357	3.67717	2.94477	0.398111	0.224386	0.000546542	0.00885891	172	303	121	117	622	5949	1286	644
C2_06880C	PRB1	Q59Z57	50.2	Prb1p	-11.0827	0	-10.9143	0	0.0433322	1	0.0425624	1	366	338	0	0	0	0	0	0
C2_06890C	C2_06890C	Q59Z55	36.3	Aldo_ket_red domain-containing protein	1.02781	0.449535	0.616299	0.0380213	0.000180606	0.292316	0.0359854	0.944831	6006	5545	16494	10470	7624	10418	15947	13009
C2_06920C	C2_06920C	Q59Z54	29.1	Smr domain-containing protein	3.3055	-0.445368	4.25167	0.500805	0.11216	0.967436	0.0270669	0.86738	74	0	427	412	550	917	494	767
C2_06940C	ARE2	Q59Z52	71.3	O-acyltransferase	-0.609667	1.36428	-0.384102	1.58985	0.929912	0.915978	0.942944	0.738338	0	240	185	0	102	78	350	208
C2_06950C	ATP23	Q59Z51	27.8	Mitochondrial inner membrane protease ATP23 (EC 3.4.24.-)	-0.0752252	0.135811	-0.305548	-0.0945114	0.930975	0.942919	0.561086	0.890935	1173	860	1172	1023	606	1093	983	1191
C2_06960W	SPE3	Q59Z50	33.9	Spermidine synthase	-0.246025	0.163674	0.0159641	0.425663	0.354643	0.750181	0.965605	0.0659182	23748	22850	24374	20297	25057	21966	30787	32522
C2_06970W	AAH1	Q59ZB1	40.8	Adenine deaminase (ADE) (EC 3.5.4.2) (Adenine aminohydrolase) (AAH)	0.739836	-3.22063	0.935782	-3.02468	0.749053	0.0934198	0.633056	0.0586764	18203	20329	34583	37992	2403	78594	4856	4612
C2_07000W	C2_07000W	A0A1D8PHS4	26.1	ANK_REP_REGION domain-containing protein	0.406441	0.144695	-0.833908	-1.09565	0.25546	0.885336	0.00596167	0.000227735	3255	3962	5306	5493	2202	1823	2736	2621
C2_07010W	C2_07010W	A0A1D8PHU4	42.5	Uncharacterized protein	3.51244	-0.588676	5.51636	1.41524	0.641992	0.988123	0.380738	0.868545	0	14	188	0	0	700	0	512
C2_07030C	C2_07030C	A0A1D8PHU0	30.4	Mitochondrial 54S ribosomal protein MRPL50	0.481556	-0.146953	-0.0939726	-0.722482	0.000336749	0.569482	0.598137	2.89387e-08	9497	10784	16815	15274	8472	10802	10699	9844
C2_07070W	C2_07070W	Q59Z38	42.9	NADPH:quinone reductase	-1.50175	-1.05557	1.37452	1.8207	0.607222	0.873623	0.616299	0.499811	269	155	179	0	541	569	262	376
C2_07080C	C2_07080C	Q59Z37	20.5	Uncharacterized protein	-1.31094	-0.737622	-1.15383	-0.580509	0.0118747	0.362404	0.0277884	0.345146	5704	11268	5323	2525	3451	4247	2618	2846
C2_07090C	OLE2	A0A1D8PHT9	60.8	Acyl-CoA desaturase (EC 1.14.19.1)	2.33981	0.491237	3.3805	1.53193	0.00940317	0.840309	6.39751e-05	0.110306	150	42	633	482	1322	636	1632	1763
C2_07100W	C2_07100W	A0A1D8PHT4	53.6	SWIB domain-containing protein	0.589291	-0.530576	1.03581	-0.084057	0.214361	0.433445	0.0123652	0.906517	1917	1521	3392	2513	2364	4962	2969	2888
C2_07110C	C2_07110C	A0A1D8PHT8	93.2	Uncharacterized protein	0.841488	-0.345109	0.652036	-0.534561	0.162415	0.800155	0.283315	0.409457	318	675	1076	935	682	897	663	805
C2_07120W	RFA2	Q59Z33	29.4	Rfa2p	-0.11013	-0.317716	-0.184771	-0.392356	0.797424	0.483702	0.583993	0.186147	6098	5132	6095	5709	3825	6335	4795	4717
C2_07130C	RCK2	A0A1D8PI07	65.8	Serine/threonine protein kinase	-0.68533	-0.417114	0.474262	0.742478	0.0105755	0.286897	0.0909452	0.00547486	2447	1852	1578	1458	2676	3396	2496	2881
C2_07140W	C2_07140W	A0A1D8PHU6	27.7	Putative phosphoric monoester hydrolase	0.330981	0.187151	-0.00651992	-0.150349	0.0534309	0.509694	0.982522	0.45405	13425	16422	22245	20275	13235	16890	18842	21701
C2_07190C	C2_07190C	Q59Z25	18.7	Mitochondrial nucleoid protein	-0.253242	-0.911369	0.0127769	-0.64535	0.545055	0.0116215	0.982522	0.055506	4119	4496	4420	3785	3114	5859	2913	2619
C2_07200W	C2_07200W	Q59Z24	12.9	DNA-directed RNA polymerase subunit	1.03113	-0.0864555	-1.0092	-2.12679	0.0598761	0.978763	0.0609347	1.54988e-05	2339	3406	6180	7028	824	2157	1536	1681
C2_07210C	TPK2	A0A1D8PHU1	47.3	cAMP-dependent protein kinase catalytic subunit	0	-23.9109	23.696	0	1	2.16315e-05	6.33277e-06	1	0	0	0	0	0	505	0	0
C2_07220W	C2_07220W	A0A1D8PHU2	29.5	Proteasome assembly chaperone 2	-0.249029	0.485273	0.041023	0.775325	0.466755	0.190633	0.922812	0.00383824	4441	3195	3864	3442	3696	4259	6892	6310
C2_07260C	DQD1	Q59Z17	16.1	Catabolic 3-dehydroquinase (cDHQase) (EC 4.2.1.10) (3-dehydroquinate dehydratase)	0.953619	-0.316045	0.0354416	-1.23422	0.273176	0.908511	0.980186	0.125819	506	507	1166	1059	245	853	618	378
C2_07280W	C2_07280W	A0A1D8PHV4	63.8	Uncharacterized protein	-8.46476	-0.761494	1.28624	8.98951	1.04256e-05	0.795835	0.336022	3.40499e-06	47	68	0	0	180	93	95	103
C2_07290W	LIA1	Q59Z14	35.8	Deoxyhypusine hydroxylase (DOHH) (EC 1.14.99.29) (Deoxyhypusine dioxygenase) (Deoxyhypusine monooxygenase)	0.0249246	-0.282581	0.0766349	-0.230871	0.928786	0.0996585	0.666173	0.112529	28667	25908	32989	30022	25462	33049	29105	27628
C2_07300C	RPA12	A0A1D8PHV8	13.5	DNA-directed RNA polymerase subunit	-0.0560492	0.22544	-1.28722	-1.00573	0.969361	0.896301	0.00925631	0.0548048	1088	2159	1816	1708	705	617	950	906
C2_07310W	CCT5	Q59Z12	59.8	Chaperonin-containing T-complex subunit	-0.0250615	0.245773	-0.18195	0.0888847	0.979091	0.67264	0.609358	0.835411	10904	8083	10381	10752	6778	10389	12233	11593
C2_07320W	ARP3	Q59Z11	46.6	Actin-related protein 3	0.327588	-0.116638	0.151806	-0.29242	0.0228333	0.703187	0.351927	0.0467876	6639	6134	9543	8646	6841	7470	7925	7770
C2_07330W	TOR1	A0A1D8PHX3	281.2	Serine/threonine-protein kinase TOR (EC 2.7.11.1)	-0.332557	0.186906	-0.175316	0.344148	0.535474	0.893694	0.758981	0.506689	698	596	701	474	448	729	726	841
C2_07340W	NOC4	A0A1D8PI20	65.2	Ribosome biosynthesis protein	0.681486	-0.944094	1.49202	-0.133556	0.388336	0.330186	0.0202874	0.901479	183	245	259	504	501	726	398	350
C2_07350W	MCM3	A0A1D8PHW4	98.5	DNA helicase (EC 3.6.4.12)	2.75937	0.145947	2.88327	0.26985	8.68933e-11	0.942919	1.071e-11	0.657601	71	61	527	487	356	649	672	620
C2_07370W	C2_07370W	Q59U54	39.6	GCR1_C domain-containing protein	0.680528	-0.388562	0.410933	-0.658158	0.124252	0.611248	0.379952	0.130881	1128	1157	2367	1804	1725	1284	1214	1573
C2_07380W	SSC1	P83784	69.7	Heat shock protein SSC1, mitochondrial (Cytoplasmic antigenic protein 6) (mtHSP70)	0.348919	0.0975299	-0.0668825	-0.318271	0.0650652	0.843496	0.792111	0.095022	138401	148418	205184	207774	110950	169188	172051	179106
C2_07400C	APR1	Q59U59	45.4	Proteinase A	0.0731512	-0.472133	0.622427	0.0771429	0.924678	0.452912	0.128818	0.906501	1451	1850	2099	1837	1784	3464	1992	2399
C2_07410W	C2_07410W	Q59U61	55.3	Putative carboxylic ester hydrolase	-1.02492	0.0826155	0.561349	1.66889	0.0505995	0.978558	0.31299	0.000515049	144	125	78	72	168	237	229	276
C2_07420W	C2_07420W	A0A1D8PHW0	27.2	Sedoheptulose-bisphosphatase	-0.109594	0.776921	0.133658	1.02017	0.781641	0.00386992	0.683548	1.46919e-05	4668	5615	5008	5726	5184	6223	10183	13005
C2_07450C	RCL1	A0A1D8PHX2	40.4	rRNA-processing endoribonuclease	-0.792575	0.11472	-0.225502	0.681793	0.0093808	0.926666	0.549802	0.0295688	1863	1482	1274	931	1416	1465	1854	1865
C2_07460W	TAF4	Q59U67	39.6	Transcription initiation factor TFIID subunit 4 (TBP-associated factor 4)	0.279796	0.166768	0.124558	0.0115298	0.447125	0.834822	0.760185	0.988658	396	394	617	475	385	489	578	581
C2_07490W	HEM15	Q59U72	44	Ferrochelatase (EC 4.99.1.1)	0.274547	-0.280183	1.82968	1.27495	0.361357	0.515343	7.69342e-17	2.54539e-08	2800	3020	4755	3280	10335	10431	10717	9679
C2_07510W	C2_07510W	A0A1D8PHW7	31	G-patch domain-containing protein	1.60871	-11.364	2.1967	-10.776	0.0288588	5.81922e-11	0.00151419	2.17268e-10	65	112	349	264	376	442	0	0
C2_07540W	C2_07540W	A0A1D8PI37	12.2	Uncharacterized protein	0.228868	0.190846	-0.194654	-0.232676	0.416966	0.688915	0.473058	0.392274	9541	8613	13888	10375	7945	7994	9937	11811
C2_07550W	C2_07550W	A0A1D8PHY0	23.5	Uncharacterized protein	-0.294448	0.130659	-0.690759	-0.265652	0.0189947	0.565432	7.59279e-10	0.0385757	12756	13631	13057	11360	7570	8962	11179	10252
C2_07590W	VMA10	Q59U85	12.8	V-type proton ATPase subunit G	0.421156	-0.093334	0.0999857	-0.414504	0.060035	0.900297	0.727387	0.0636468	23198	28289	37797	39989	27966	27294	29404	32571
C2_07600C	MSC7	A0A1D8PHY1	68.4	Meiotic recombination directing protein	-2.86366	-0.115255	-2.55466	0.193748	8.3e-12	0.966347	1.4675e-09	0.779285	4726	5757	946	694	566	1289	862	1114
C2_07610C	C2_07610C	A0A1D8PHX5	82.9	Uncharacterized protein	1.23808	0.199288	0.942751	-0.0960435	2.85528e-10	0.637814	2.82511e-06	0.758395	1513	1630	3908	4449	2654	3484	4062	4252
C2_07630C	C2_07630C	Q59U89	13.1	SBDS domain-containing protein	1.03792	-0.629271	1.94566	0.278468	0.000237597	0.091518	2.12625e-13	0.443339	18448	23308	46711	49975	58441	107304	64457	59943
C2_07680W	C2_07680W	A0A1D8PHY2	32.8	Mitochondrial 54S ribosomal protein YmL7/YmL5	0.426595	-2.43382	0.0533558	-2.80706	0.921133	0.52333	0.991644	0.25695	178	203	322	260	83	337	0	89
C2_07730W	YVC1	Q5A2J7	77.3	Calcium channel YVC1 (Vacuolar transiant receptor potential (TPR) channel YVC1) (Yeast vacuolar conductance protein 1)	7.43843	-0.121446	11.0694	3.50952	0.0164429	1	0.000124624	0.221866	0	0	76	0	272	547	439	432
C2_07740W	NST1	Q5A2K0	158.4	Stress response protein NST1	-2.71426	0.842675	-2.74495	0.811986	1.38075e-13	0.111211	7.29482e-14	0.0601131	29846	32921	5377	5434	4741	4643	13205	6812
C2_07800W	C2_07800W	Q5A2K4	13.3	Uncharacterized protein	1.09419	-0.583588	0.655901	-1.02188	8.77435e-05	0.132679	0.0281652	0.0003424	2427	3188	6532	6984	3489	5568	3682	3378
C2_07810W	C2_07810W	Q5A2K5	50.5	L-type lectin-like domain-containing protein	2.10322	-0.00898942	1.29658	-0.815629	4.28888e-06	1	0.00762758	0.125719	954	982	4982	4454	1565	3375	3547	2095
C2_07820C	PHO86	A0A1D8PI08	38.5	Pho86p	2.64082	0.221542	2.59323	0.173953	6.21029e-11	0.870217	1.41986e-10	0.792674	1164	901	7582	7040	7704	4532	8614	8835
C2_07830W	FLC3	A0A1D8PI48	80.5	Flc3p	12.3707	-0.487419	13.4139	0.555823	7.1511e-16	0.197979	1.51807e-18	0.0539903	0	0	1207	1007	1709	2383	1682	1752
C2_07890W	PRS5	Q5A2L2	48.5	Ribose phosphate diphosphokinase subunit	-1.10033	-0.673068	-0.232874	0.194389	0.00250337	0.187915	0.624018	0.70573	1427	1815	905	808	1489	1255	903	1172
C2_07900W	GDH2	A0A1D8PI00	119.7	NAD-specific glutamate dehydrogenase (EC 1.4.1.2)	-0.134604	-0.358376	0.00479556	-0.218977	0.354461	0.0068011	0.982522	0.0865404	64012	64880	67328	65582	56097	75501	61338	59549
C2_07910C	C2_07910C	A0A1D8PI02	6.5	Uncharacterized protein	2.58817	-1.06907	6.29593	2.6387	0.217045	0.825514	0.000312766	0.19289	13	12	167	11	1735	85	334	796
C2_07930C	VRP1	A0A1D8PI26	68.1	Vrp1p	1.07326	0.599121	0.877736	0.403599	0.258027	0.752941	0.351927	0.721345	85	87	232	180	155	163	152	426
C2_07960C	NSA1	Q5A2T0	45.9	Ribosome biogenesis protein NSA1	1.08537	0.0218192	2.46267	1.39912	0.761584	1	0.356286	0.652756	29	64	234	0	242	273	307	314
C2_08000C	KRE30	Q5A2T2	68.1	ATP-binding cassette family ATPase	-0.19645	-0.225908	0.0523139	0.0228559	0.263718	0.319359	0.804805	0.933723	23135	23333	23000	22883	20440	28687	25229	24140
C2_08010W	BLM3	Q5A2T3	252.4	Blm3p	-0.27644	0.381849	-1.64781	-0.989524	0.744281	0.783133	0.00243131	0.0982838	3219	3583	3432	2942	558	1727	1765	1621
C2_08020C	C2_08020C	Q5A2T4	42.4	Uncharacterized protein	-0.338245	-0.351703	2.02432	2.01086	0.276561	0.395267	3.90583e-18	2.63508e-17	946	1165	923	962	3497	5276	3861	4201
C2_08040C	RPS10	A0A1D8PI15	13.8	Ribosomal 40S subunit protein S10A	0.199518	0.794442	-0.0165015	0.578422	0.468981	0.000397619	0.963435	0.00819094	16319	21355	28480	20770	17265	20343	36939	40419
C2_08050C	SIT1	Q5A2T6	67.4	Siderophore transporter	8.841	2.10801	7.88601	1.15303	0.00940317	0.765774	0.0210516	0.791888	0	0	97	94	80	0	215	235
C2_08070C	MRS4	Q5A2T7	35.3	Fe(2+) transporter	-0.0792711	0.375899	0.0828882	0.538059	0.929746	0.678052	0.902318	0.283847	664	475	756	480	520	711	956	924
C2_08080C	IFM3	A0A1D8PI81	29.3	Ifm3p	0.515676	-0.424965	1.67129	0.730653	0.538491	0.787761	0.00813029	0.329025	114	70	133	164	225	379	255	270
C2_08130W	ARA1	A0A1D8PI24	37.3	D-arabinose 1-dehydrogenase (NAD(P)(+))	0.16961	0.0215093	0.672251	0.52415	0.40348	0.981527	9.33542e-06	0.000979054	13892	13776	17618	17593	18659	26309	25022	28685
C2_08140C	PHM7	A0A1D8PI19	104.3	Phm7p	0.412718	0.357405	0.940373	0.88506	0.207087	0.449326	0.000621473	0.00172428	8839	8308	14042	11901	18449	14203	23995	26600
C2_08160C	C2_08160C	A0A1D8PI76	19.3	Protein YOP1	0.0910486	-0.226198	0.947972	0.630726	0.8965	0.814494	0.0100452	0.116284	9737	9474	13097	10204	11953	26613	20064	17889
C2_08190W	VMA5	Q5A2U9	44.7	V-type proton ATPase subunit C	-2.24002	0.00445651	-1.40223	0.842243	7.48962e-10	1	0.000230403	0.0440751	15646	16851	3671	4087	7348	4748	6472	8334
C2_08260W	C2_08260W	A0A1D8PI29	11.2	Uncharacterized protein	-1.78178	-1.70548	0.170024	0.246325	0.266143	0.452122	0.938979	0.918834	1060	1328	33	717	1381	1305	432	556
C2_08270C	C2_08270C	A0A1D8PI35	43	Casein kinase	0.502905	0.321701	-0.382959	-0.564163	0.72995	0.942859	0.78123	0.673818	139	485	400	584	288	179	254	461
C2_08290C	RGI1	Q59KG2	23.6	Respiratory growth induced protein 1	-0.599373	-1.26269	1.62444	0.961121	0.417321	0.0883433	0.00495961	0.134489	576	1105	759	504	1656	3716	1350	1227
C2_08310W	TIM22	A0A1D8PI78	19.6	Mitochondrial import inner membrane translocase subunit TIM22	0.431972	0.559029	-0.71984	-0.592783	0.168186	0.125402	0.00905136	0.0407078	37365	41473	72341	49086	20792	27882	48705	35573
C2_08450W	C2_08450W	A0A1D8PI53	171.1	Uncharacterized protein	-0.886405	0.775546	-1.87437	-0.212422	0.533701	0.767948	0.105057	0.909442	7820	8590	4997	5038	3824	344	4207	4984
C2_08460C	C2_08460C	Q59Y16	17.9	TR_THY domain-containing protein	-0.130016	0.0140171	-0.469266	-0.325233	0.79039	1	0.156197	0.37275	7891	7612	7728	8276	6253	4863	6531	7035
C2_08480W	RRP8	A0A1D8PI52	49.5	Ribosomal RNA-processing protein 8 (EC 2.1.1.-)	0.00982245	-2.32823	-0.170421	-2.50848	1	0.549743	0.960952	0.319683	141	67	98	138	105	79	0	45
C2_08500W	RSP5	Q59Y21	93.4	E3 ubiquitin-protein ligase (EC 2.3.2.26)	-1.01743	0.133724	-0.862156	0.288998	1.72767e-15	0.632608	2.66915e-11	0.0552459	21753	22027	12876	11652	11418	12894	16864	14777
C2_08540C	C2_08540C	A0A1D8PIA8	40.8	Uncharacterized protein	-7.98092	1.14924	-0.645655	8.48451	0.171049	0.967436	0.934946	0.131654	81	0	0	0	0	58	52	88
C2_08560W	SMC2	A0A1D8PI59	133.9	Structural maintenance of chromosomes protein	0.421906	-1.2832	1.91503	0.209926	0.779789	0.392499	0.0505412	0.893349	276	412	831	239	572	2174	692	581
C2_08570W	ANP1	Q59Y27	49.5	Anp1p	0.97526	-0.674412	1.23214	-0.417536	0.0604698	0.384011	0.0116183	0.498251	2339	1681	4788	4202	2878	7003	3976	3119
C2_08590W	YWP1	Q59Y31	54.2	Yeast-form wall Protein 1 (GPI-anchored protein 24) (Thiol-extractable peptide 1) (flocculation protein 1)	3.8348	-0.988972	1.62562	-3.19816	9.462e-16	0.175941	0.0017876	8.29809e-11	506	399	8254	6468	785	2148	915	772
C2_08610W	ERG9	A0A1D8PI71	51.2	Bifunctional farnesyl-diphosphate farnesyltransferase/squalene synthase	0.415764	0.189766	1.40352	1.17752	0.627335	0.944276	0.0254478	0.0740248	11048	9566	22010	9752	36528	16400	31057	43772
C2_08630C	C2_08630C	Q59Y36	54.9	Uncharacterized protein	-0.0132427	-0.0682539	-0.974358	-1.02937	0.999002	0.969322	0.00153291	0.000901811	7752	9739	9634	9930	3301	5858	5516	4634
C2_08640C	PST2	Q59Y37	21.7	Pst2p	0.585098	0.0445771	0.924089	0.383569	0.210765	0.988123	0.0256982	0.446709	8539	10117	22104	10131	17055	18582	18935	24876
C2_08650W	C2_08650W	Q59Y38	17.8	zf-CHCC domain-containing protein	0.776527	0.0791878	0.0844728	-0.612866	0.000348586	0.937011	0.793503	0.00716164	11245	14443	25820	23977	13775	13497	15663	18823
C2_08680W	MSH3	Q59Y41	118.8	DNA mismatch repair protein MSH3 (MutS protein homolog 3)	-0.350599	0.487397	-0.221357	0.616639	0.607612	0.607636	0.748594	0.287664	201	317	225	233	186	266	360	385
C2_08720W	C2_08720W	A0A1D8PIC9	44.4	PAPA-1 domain-containing protein	1.66885	0.877066	0.310412	-0.481366	0.170798	0.71382	0.840847	0.758746	503	369	1312	1806	857	167	667	1735
C2_08730W	MFG1	Q59Y46	83.4	Morphogenetic regulator of filamentous growth protein 1	0.0583839	-2.49133	0.638828	-1.91088	1	0.50628	0.834799	0.473068	177	194	210	226	263	322	0	125
C2_08760C	TIF4631	A0A1D8PI73	118.2	Translation initiation factor eIF4G	0.00715472	-0.966609	2.04993	1.07617	1	0.607457	0.0431874	0.361651	13660	13803	17810	13625	94831	11604	22297	47852
C2_08770C	C2_08770C	Q59Y55	12.8	Uncharacterized protein	-9.75303	-1.20043	-0.513563	8.03904	0.00415487	0.918566	0.912622	0.0228495	149	131	0	0	89	110	0	104
C2_08780W	RPT6	A0A1D8PI93	44.9	Proteasome regulatory particle base subunit	-0.462797	-0.303155	0.277681	0.437323	0.141313	0.554466	0.401255	0.159652	9464	8647	8053	6882	8181	14450	11405	9915
C2_08790W	JEM1	A0A1D8PIB5	74.2	Jem1p	8.89484	0.269731	9.61965	0.994545	4.05476e-07	0.942941	3.38057e-08	0.331362	0	0	130	71	138	154	184	235
C2_08800C	APE3	A0A1D8PI95	60.9	Peptide hydrolase (EC 3.4.-.-)	0.131095	-0.175697	-0.280162	-0.586953	0.705394	0.753741	0.300241	0.0151153	17415	17948	20145	23491	14660	14558	13877	17073
C2_08810C	IPP1	P83777	32.1	Inorganic pyrophosphatase (EC 3.6.1.1) (Pyrophosphate phospho-hydrolase) (PPase)	0.327503	-0.286553	0.0951183	-0.518937	0.496908	0.737896	0.860986	0.219618	65038	59822	90413	87110	41327	97860	67241	63854
C2_08840W	C2_08840W	Q59Y64	15	RNA methylation protein	0.345361	0.613343	-1.02888	-0.760895	0.77735	0.719461	0.232307	0.417241	496	342	746	475	158	265	536	214
C2_08860W	C2_08860W	A0A1D8PI94	89.2	Serine/threonine protein kinase	-5.6962	-0.394618	-4.70033	0.601255	2.09623e-79	0.525394	1.97351e-55	0.11846	7966	12130	248	192	336	448	385	317
C2_08930W	C2_08930W	Q59SD0	32.1	Proteasome regulatory particle lid subunit	-0.434232	0.397398	-0.60949	0.222139	0.0411664	0.14454	0.00212811	0.361374	6108	5143	5323	4166	3344	4140	5926	5727
C2_09010W	STB3	Q59SE2	54.8	Stb3p	0.60311	1.01428	-2.13401	-1.72283	0.877864	0.883418	0.395629	0.529281	450	624	954	891	0	270	398	190
C2_09020W	CDC47	A0A1D8PIE7	87.5	DNA replication licensing factor MCM7 (EC 3.6.4.12)	0.146099	0.689122	0.277571	0.820594	0.991949	0.94771	0.941672	0.814317	557	0	329	375	390	287	784	534
C2_09040W	C2_09040W	A0A1D8PIF1	22	SAP domain-containing protein	0.0753218	-0.115624	-0.348173	-0.539118	0.901033	0.932343	0.345067	0.11846	18356	22522	25079	23655	16656	15423	13695	21916
C2_09050C	C2_09050C	A0A1D8PI97	58.2	Uncharacterized protein	-0.659248	0.577529	0.140835	1.37761	0.0581918	0.197979	0.756443	8.39832e-06	438	415	335	279	414	542	741	945
C2_09060C	ASN1	A0A1D8PIB2	64.6	Asparagine synthase (Glutamine-hydrolyzing) 2	0.42945	0.47111	-0.355664	-0.314004	0.000942821	0.000800287	0.00718036	0.0223104	43955	39126	65081	61766	31110	34423	52893	55113
C2_09070C	C2_09070C	A0A1D8PIC6	93.9	PlsC domain-containing protein	-0.319334	0.0954914	-0.193614	0.221211	0.779988	0.981527	0.851993	0.842318	435	284	330	324	231	419	545	258
C2_09140C	MET10	A0A1D8PIF6	121.9	Sulfite reductase subunit alpha	0.863644	0.239171	0.415396	-0.209076	4.19462e-06	0.489493	0.0452406	0.39071	7986	8995	18460	16567	11738	10902	16352	15656
C2_09150W	MIT1	A0A1D8PIF7	61.8	Mannosylinositol phosphorylceramide synthase catalytic subunit	2.87918	-0.891591	3.68767	-0.0831067	0.0042937	0.673662	0.000130531	0.974179	44	265	1486	1083	1016	3141	1219	1332
C2_09170W	SLP2	A0A1D8PIA6	29.5	Slp2p	-0.724488	0.0483506	0.000349651	0.773189	0.0166962	0.979128	1	0.010377	6138	4395	4297	2996	4835	5858	6347	6747
C2_09220W	DDR48	Q59X49	22.6	Stress protein DDR48 (DNA damage-responsive protein 48) (DDRP 48)	-0.0154728	-0.236244	1.85553	1.63476	1	0.85006	6.44234e-06	0.000117498	3131	6056	6028	4300	17430	15640	14112	19669
C2_09230C	KIS1	Q59X47	46.7	Kis1p	0.529532	-0.101262	0.625279	-0.00551462	0.173835	0.948771	0.0853434	1	2607	3371	5045	4718	5189	3937	4749	5551
C2_09260C	GLO2	A0A1D8PID4	30.7	Hydroxyacylglutathione hydrolase	0.0813463	-0.377051	0.473508	0.0151101	0.721794	0.037972	0.00151057	0.964131	5447	5213	6942	5875	7276	7619	6803	6864
C2_09270C	SGT1	A0A1D8PIG5	47.3	Co-chaperone	1.23631	0.00150444	1.06692	-0.167887	3.07986e-09	1	4.41462e-07	0.570926	6646	6803	18720	17199	14779	13370	18179	15586
C2_09300W	SRB5	Q59X40	40.2	Mediator of RNA polymerase II transcription subunit 18 (Mediator complex subunit 18)	-1.19122	-0.870138	-1.56376	-1.24268	0.712435	0.919452	0.574243	0.684434	291	196	122	120	72	96	0	110
C2_09310C	GTF1	Q59X39	19	Glutamyl-tRNA(Gln) amidotransferase subunit F, mitochondrial (Glu-AdT subunit F) (EC 6.3.5.-)	-0.646204	0.0416368	-0.791367	-0.103526	0.429973	1	0.287325	0.929541	4302	3784	2965	2889	3304	1195	2898	2871
C2_09320C	NOP7	Q59X38	67.8	Pescadillo homolog (Nucleolar protein 7 homolog)	0.175844	-0.409654	0.598291	0.0127925	0.818572	0.663384	0.245576	0.993933	3002	1657	3337	2673	2697	4584	3476	2904
C2_09350W	TAZ1	A0A1D8PIG7	47.2	Tafazzin family protein	2.84984	0.877653	1.14799	-0.824202	0.000555065	0.580097	0.229859	0.431244	434	122	2207	2353	459	820	1822	897
C2_09360W	C2_09360W	Q59X34	99.5	Uncharacterized protein	-7.73302	-1.2543	0.692695	7.17141	0.194279	0.964155	0.930677	0.227319	0	70	0	0	37	79	0	57
C2_09380W	RRP15	A0A1D8PIJ2	28.6	Rrp15p	0.631312	-0.157896	0.0686948	-0.720512	0.486088	0.967989	0.951169	0.401099	636	227	755	766	428	492	502	476
C2_09390W	ABG1	A0A1D8PIH3	32.9	Abg1p	-0.0320092	-0.161637	-1.18558	-1.31521	0.999002	0.968756	0.141078	0.100307	601	704	757	689	160	441	412	199
C2_09430W	RPL3	Q59LS1	43.9	Ribosomal 60S subunit protein L3	-0.0731074	-1.03072	0.359036	-0.598576	0.96693	0.253221	0.661097	0.43406	20065	17387	20177	20140	9710	41497	14881	13305
C2_09500W	C2_09500W	A0A1D8PIH5	53.1	tRNA dihydrouridine synthase	0.463461	-5.81181	-0.59725	-6.87252	0.881363	0.00110539	0.800426	1.89026e-05	1736	1756	2848	2611	467	1991	0	50
C2_09510C	C2_09510C	Q59YC3	63.6	Ca(2+)-binding ATP:ADP antiporter	-0.218286	0.259145	-0.746815	-0.269384	0.832023	0.909272	0.284013	0.761771	71454	89415	73641	82145	68615	23275	66760	70631
C2_09520C	CCT2	Q59YC4	56.8	Chaperonin-containing T-complex subunit	-0.0862882	0.332244	-1.29873	-0.880199	0.835066	0.403333	9.76334e-09	0.000247239	23780	28733	28234	27687	11466	9780	15558	16634
C2_09560C	C2_09560C	A0A1D8PIE9	86.6	PCI domain-containing protein	1.4675	-9.91217	1.22656	-10.1531	0.741902	0.00888013	0.765312	0.00250245	0	128	236	163	172	120	0	0
C2_09580W	AGE2	A0A1D8PIG1	42.8	Age2p	-0.614767	-0.799929	0.045806	-0.139356	0.552588	0.586956	0.974859	0.920528	2027	534	1126	797	1149	1563	1011	820
C2_09590C	C2_09590C	Q59YD1	36.2	Cu/Pi carrier	23.6684	-0.045156	25.753	2.03946	4.02048e-17	1	3.68032e-20	0.552101	0	0	585	0	836	1297	1043	1381
C2_09600C	C2_09600C	Q59YD2	18.7	Uncharacterized protein	-0.34071	-0.246078	-1.09353	-0.998896	0.444626	0.775237	0.0014036	0.00476954	7256	12570	10126	7650	4377	4972	4973	4376
C2_09620W	C2_09620W	A0A1D8PII5	84.9	Protein disulfide isomerase	7.23463	1.54434	13.5968	7.90647	0.0597997	0.876843	6.95002e-05	0.0154482	0	0	66	0	3831	429	8376	7546
C2_09640W	PMI1	P34948	48.8	Mannose-6-phosphate isomerase (EC 5.3.1.8) (Phosphohexomutase) (Phosphomannose isomerase) (PMI)	-0.619313	-0.128293	-0.68774	-0.19672	0.00145619	0.80089	0.000306303	0.419575	41150	42717	30820	30927	27102	24953	29233	27836
C2_09650W	C2_09650W	A0A1D8PIF0	18.5	RRM domain-containing protein	0.349349	-0.546598	-0.309545	-1.20549	0.844309	0.862031	0.837645	0.337672	316	499	645	532	123	577	402	132
C2_09660W	NOP16	Q59YD8	25.6	Nucleolar protein 16	-0.215331	-0.330858	0.203463	0.0879354	0.489634	0.386593	0.487158	0.809795	3213	3542	3386	3202	3096	4870	3401	4017
C2_09670C	CFD1	Q59YD9	32.2	Cytosolic Fe-S cluster assembly factor CFD1 (Cytosolic Fe-S cluster-deficient protein 1)	-2.94249	9.72655	-9.64657	3.02247	0.442209	0.0130459	0.00456506	0.411639	242	48	0	41	0	0	301	66
C2_09690C	C2_09690C	A0A1D8PIK1	73.6	Uncharacterized protein	1.19291	0.43683	-0.52785	-1.28393	0.727373	0.973629	0.87748	0.685522	29	43	137	53	0	55	35	46
C2_09720W	SUP35	Q59YE8	79.9	Translation termination factor GTPase eRF3	-0.800923	-0.0594716	-0.025847	0.715604	1.63488e-07	0.934132	0.920434	5.28277e-06	27073	22178	16929	15183	22388	26628	27794	27929
C2_09730C	IPK2	Q59YE9	39.5	Kinase (EC 2.7.-.-)	-2.04652	-0.218523	0.994061	2.82206	0.443145	0.990038	0.728921	0.241091	402	283	0	179	773	582	540	874
C2_09740W	SSO2	Q59YF0	34.3	Protein transport protein SSO2	0.652294	-0.53142	0.120509	-1.0632	0.322413	0.61356	0.884682	0.0689233	4867	4553	8741	8051	2499	8324	4093	4409
C2_09750W	LEU42	A0A1D8PIF8	63.4	Leu42p	4.35255	0.303245	3.66203	-0.387279	7.31038e-108	0.412613	2.22068e-76	0.11846	10119	9718	210536	246253	130237	121039	182375	189253
C2_09760W	C2_09760W	Q59YF2	21.4	Uncharacterized protein	-0.179125	0.571176	-0.968243	-0.217943	0.730887	0.260386	0.00466134	0.640183	7464	8018	7520	7923	4572	3246	6510	7594
C2_09780C	IRC22-1	Q59YF4	25.9	Increased recombination centers protein 22-1	0.857543	0.336968	-1.44989	-1.97047	0.491627	0.937231	0.170483	0.0527543	389	1508	1970	1893	147	585	566	476
C2_09810C	C2_09810C	A0A1D8PIK3	47.8	M20_dimer domain-containing protein	0	0.339481	8.9141	9.43336	1	0.98085	0.000847742	0.000476143	0	0	0	0	75	106	76	195
C2_09900C	TIM23	Q59YG5	23.1	Mitochondrial import inner membrane translocase subunit TIM23	0.155671	-0.060799	-0.306337	-0.522807	0.337603	0.896301	0.0250141	5.17865e-05	17615	16896	23753	19944	13627	14476	16000	16085
C2_09910C	C2_09910C	A0A1D8PIL6	6.7	Uncharacterized protein	-26.4344	0	-22.8142	0	3.55151e-07	1	1.47514e-05	1	334	0	0	0	0	0	0	0
C2_09930W	C2_09930W	Q59YG7	67.6	TUG-UBL1 domain-containing protein	-1.17329	0.293267	-0.448598	1.01796	0.000260682	0.676122	0.230028	0.0021836	2008	2997	1479	1047	1605	2114	2676	2698
C2_09960W	C2_09960W	A0A1D8PIJ8	38.1	Sulfurtransferase	0.632448	-0.33938	0.48995	-0.481879	0.242865	0.760995	0.368388	0.393407	357	319	620	569	340	641	389	513
C2_09970C	C2_09970C	Q59YH1	38.6	Glucosamine_iso domain-containing protein	-0.92975	0.456528	0.140518	1.5268	0.0144968	0.466981	0.792177	1.91471e-05	4911	4331	2899	2609	6007	4047	8661	8102
C2_09980W	C2_09980W	A0A1D8PIK6	35.7	PI31_Prot_C domain-containing protein	0.0647796	0.311573	0.106383	0.353176	0.91169	0.569482	0.800426	0.312374	5817	3830	6016	5458	4985	5517	7471	8029
C2_09990C	YOR1	A0A1D8PIM2	168.2	ATP-binding cassette transporter	-0.599584	-2.17005	0.445469	-1.125	0.930171	0.797054	0.932863	0.822277	131	135	0	189	209	149	95	0
C2_10030C	MP65	Q59XX2	39.2	Cell surface mannoprotein MP65 (EC 3.2.1.-) (Mannoprotein of 65 kDa) (Soluble cell wall protein 10)	2.40363	-0.614513	0.280555	-2.73758	0.0047393	0.76626	0.818969	0.00115029	3189	2379	10559	22243	1106	6164	3109	2182
C2_10050W	C2_10050W	A0A1D8PIM4	159.8	Ubiquitin-specific protease	0.50772	-0.197674	0.45389	-0.251504	0.0453068	0.710187	0.0737865	0.390094	3523	4386	6566	6159	4372	6702	5898	5402
C2_10080W	RAP1	A0A1D8PIK2	49.8	DNA-binding transcription factor	0.0539288	-0.53937	-0.415817	-1.00912	1	0.967436	0.909032	0.765135	576	677	773	701	0	1038	482	289
C2_10090C	C2_10090C	A0A1D8PIL7	113.4	RGS domain-containing protein	-0.716322	0.159929	-1.30743	-0.431181	0.0732317	0.909272	0.000265392	0.331855	684	802	583	446	314	286	412	391
C2_10100W	CWC22	Q59XY0	75.2	Pre-mRNA-splicing factor CWC22	0.396722	-0.526811	0.369816	-0.553717	0.67767	0.720575	0.673668	0.511084	233	256	470	268	257	389	342	181
C2_10110W	CYC1	P53698	12.2	Cytochrome c	0.227431	-1.24289	0.624417	-0.845901	0.827867	0.13121	0.394325	0.233017	2411	2437	3004	3397	1713	6204	1993	1789
C2_10120W	C2_10120W	A0A1D8PIN9	30.7	Phosducin domain-containing protein	-0.592085	0.219705	0.102912	0.914703	0.65237	0.967436	0.945399	0.424051	627	847	967	177	916	645	1023	1185
C2_10200W	C2_10200W	A0A1D8PIN6	18.7	Dolichyl-diphosphooligosaccharide--protein glycosyltransferase subunit OST2 (Oligosaccharyl transferase subunit OST2)	-0.0500514	0.388407	0.581668	1.02013	0.940846	0.425006	0.0650872	0.000497775	446	401	526	406	615	663	938	1054
C2_10210C	RAS1	Q59XU5	32.4	Ras-like protein 1 (Ras homolog type B)	-0.0862126	0.31959	0.0318595	0.437662	0.573614	0.0147991	0.848184	7.71738e-05	13014	13298	14907	13216	11776	15572	19043	21227
C2_10220C	PHO23	A0A1D8PIP3	51.7	Chromatin modification-related protein	0	-6.14717	5.88559	0	1	0.546262	0.369468	1	0	0	0	0	20	0	0	0
C2_10240W	GPD1	Q59XU9	43.8	Glycerol-3-phosphate dehydrogenase [NAD(+)] (EC 1.1.1.8)	0.0482372	0.111142	-0.120198	-0.0572935	0.895757	0.834822	0.628627	0.847777	2445	2254	2940	2578	1878	2523	2916	2681
C2_10250C	SET2	Q59XV0	95.3	Histone-lysine N-methyltransferase, H3 lysine-36 specific (EC 2.1.1.43) (SET domain-containing protein 2)	0.87504	0.468776	0.576786	0.170521	0.00260039	0.280219	0.0610032	0.673818	1966	1759	3921	3819	2873	2692	3901	5345
C2_10260C	CMK2	Q59XV1	53.7	Calmodulin-dependent protein kinase	2.44901	0.883099	0.780932	-0.784975	3.90275e-14	0.0390302	0.0345774	0.0358478	1340	1268	10612	5751	1959	2600	5334	4565
C2_10270W	PUS7	A0A1D8PIN8	87	Pseudouridine synthase	0.217306	-0.375886	-1.40562	-1.99881	0.729621	0.663384	0.000487298	4.21546e-07	15177	13110	16587	20457	3410	7716	5345	4515
C2_10280C	SPT23	A0A1D8PIM6	82.6	Protein phosphatase (EC 3.1.3.16)	-0.779334	0.552058	0.307636	1.63903	0.197644	0.569482	0.658641	0.00173205	1214	1215	778	821	1918	1017	2636	2648
C2_10290W	SLR1	A0A1D8PIP0	28.6	Slr1p	0.700682	-0.39679	0.722616	-0.374856	0.325811	0.790006	0.286571	0.638071	4357	4027	7888	7553	3089	11593	6312	6291
C2_10350C	ACS1	Q59XW4	75.1	Acetyl-coenzyme A synthetase (EC 6.2.1.1)	-0.477013	-0.598255	0.942848	0.821606	0.160635	0.132174	0.00122971	0.00684794	8531	5647	6664	4976	12301	15418	10882	10754
C2_10360C	HEM3	O94048	37.7	Porphobilinogen deaminase (PBG) (EC 2.5.1.61) (Hydroxymethylbilane synthase) (HMBS) (Pre-uroporphyrinogen synthase)	0.965595	1.39458	-0.0418322	0.387152	0.000600374	1.02867e-06	0.928946	0.241285	901	1165	2516	2064	1031	976	3256	3056
C2_10460C	C2_10460C	Q5A5S8	71.4	Methylenetetrahydrofolate reductase (EC 1.5.1.20)	-0.354676	0.166565	-0.509841	0.0114001	0.103375	0.699232	0.0101909	0.982841	5050	5241	4874	4260	3529	3745	5274	4435
C2_10470C	ATG27	Q5A5S7	28.3	Autophagy-related protein 27	0.314913	0.671779	-0.185508	0.171358	0.455004	0.124446	0.674855	0.709977	545	438	796	599	389	489	823	830
C2_10480W	MDH1-3	Q5A5S6	35.8	Malate dehydrogenase (EC 1.1.1.37)	-0.518301	-0.193588	-0.44372	-0.119007	0.315026	0.896436	0.379815	0.861163	4082	5234	3247	4059	2349	4736	4039	3115
C2_10550C	GCN1	A0A1D8PIR2	265.7	Gcn1p	-0.0726345	0.114852	0.686716	0.874202	0.824372	0.829244	0.00023933	2.34191e-06	6333	5527	6799	6011	7880	11647	12179	12630
C2_10580W	UBC15	Q5A5R2	20.2	Ubc15p	-1.88044	0.926119	-1.09818	1.70839	0.69356	0.953219	0.815158	0.709383	140	123	0	77	113	0	142	138
C2_10610W	GYP5	A0A1D8PIQ7	63.5	Gyp5p	-0.351367	0.186549	-0.689757	-0.151841	0.038832	0.516875	6.21673e-06	0.451925	5159	5187	4513	4655	2931	3566	4537	4208
C2_10620W	RPS4A	Q5A5Q8	29.3	40S ribosomal protein S4	-0.585363	-0.188588	0.00721233	0.403987	1.71136e-06	0.360476	0.976038	0.00195183	166632	147010	128156	109477	145947	173254	168809	162930
C2_10640C	MTR2	A0A1D8PIR7	20.5	Mtr2p	0.89047	0.355673	0.572507	0.0377096	0.12097	0.782407	0.341113	0.976089	331	704	1114	1050	705	846	1242	1106
C2_10650W	C2_10650W	A0A1D8PIS1	6.2	Uncharacterized protein	1.76453	-0.419091	2.8782	0.694582	1.68654e-11	0.344441	1.05797e-29	0.0186788	1378	1598	4966	6391	11172	10731	9905	9690
C2_10670W	C2_10670W	Q5A5Q4	35.9	Uncharacterized protein	1.42037	-0.00205897	1.22657	-0.195855	0.0123679	1	0.0321518	0.817599	4777	6235	25963	8225	12981	12828	16316	14449
C2_10680W	C2_10680W	Q5A5Q3	47.4	Uncharacterized protein	-0.00722603	0.3169	-1.13778	-0.813654	1	0.981527	0.714982	0.816271	53	74	54	87	53	0	43	43
C2_10690W	TPS3	A0A1D8PIS4	112.3	Trehalose 6-phosphate synthase/phosphatase complex subunit	-1.00706	-0.149062	0.350039	1.20804	0.0419464	0.942919	0.550443	0.0118635	504	792	433	301	646	1044	947	832
C2_10700C	C2_10700C	Q5A5P9	34.1	CID domain-containing protein	0.188313	-0.431079	0.862988	0.243596	0.862062	0.773845	0.206408	0.791295	468	308	491	511	426	1052	571	689
C2_10710W	TIF11	Q5A5P8	17.4	Tif11p	0.0475815	-0.0512041	-0.646259	-0.745045	0.897855	0.961692	0.000581969	7.38838e-05	42613	42781	48982	50775	28017	26623	32677	30411
C2_10720C	C2_10720C	Q5A5P7	40.2	Uncharacterized protein	0.026514	0.70711	0.0204396	0.701035	0.956768	0.000655424	0.949437	0.000257876	1154	1115	1280	1333	1050	1282	2243	2262
C2_10740C	C2_10740C	Q5A5P4	103.7	Tetratricopeptide repeat-containing protein	0.184819	-0.612817	1.34379	0.546151	0.81241	0.416147	0.00330242	0.319683	366	278	440	392	816	829	496	792
C2_10750C	AKL1	Q5A5P2	81.8	Serine/threonine protein kinase	0.0674971	-0.231661	0.350052	0.0508945	0.855188	0.554466	0.131784	0.8851	4641	6168	6463	6335	6016	7969	6795	7252
C2_10760C	C2_10760C	Q5A5P1	78.6	Origin recognition complex subunit 2	-1.18611	-1.2098	1.72093	1.69724	0.709713	0.838107	0.517846	0.54148	94	49	0	68	194	290	132	113
C2_10770W	RPC11	Q5A5N9	12.7	DNA-directed RNA polymerase subunit	0.341716	-0.467266	-0.980263	-1.78924	0.480718	0.462083	0.00930156	5.26638e-07	2075	2574	3388	3274	815	1621	1037	1003
C2_10850C	C2_10850C	Q5A5N1	60.6	bVLRF1 domain-containing protein	0.119092	-0.238802	0.9089	0.551006	0.929746	0.932343	0.207606	0.503226	694	718	590	1118	783	1989	1305	1389
C2_10860C	C2_10860C	Q5A5N0	40.6	Uroporphyrinogen decarboxylase (EC 4.1.1.37)	-0.965895	0.0114336	-0.383011	0.594317	3.26248e-09	1	0.0359854	0.000678704	12804	15314	8146	8123	10487	11199	12213	13835
C3_00090W	RPS24	Q5A7K0	15.5	40S ribosomal protein S24	-0.0258998	-0.273202	-0.277911	-0.525213	0.917176	0.0861034	0.0302938	1.1944e-05	75244	74124	82356	83580	57584	66963	63107	59046
C3_00100W	C3_00100W	Q5A7K1	27.2	mRNA splicing protein	-5.37813	-1.67971	-3.22922	0.469197	0.0852178	0.833551	0.333113	0.927882	1193	2179	0	87	114	259	132	0
C3_00110C	SEC6	Q5A7K3	94.7	SNARE-binding exocyst subunit	0	0.582785	8.87247	9.63504	1	0.951483	0.000480395	0.000167414	0	0	0	0	82	92	204	104
C3_00130C	C3_00130C	Q5A7K7	59.4	LsmAD domain-containing protein	0.131751	0.599806	-0.269708	0.198346	0.830787	0.262526	0.556745	0.697236	10522	11687	13981	13551	11017	7101	15772	17703
C3_00200C	ETR1	A0A1D8PIW1	39.9	Etr1p	-0.134651	0.118988	0.317555	0.571194	0.64778	0.834822	0.163306	0.00667212	10766	13658	13901	11359	14850	15740	18077	21540
C3_00220W	HGT19	Q5A7L9	71.6	Hgt19p	-0.130773	-0.28029	2.89008	2.74056	0.774764	0.602062	1.3567e-30	9.8945e-27	941	788	951	843	5262	7858	5426	7268
C3_00240C	GLO3	Q5A7M1	49.3	ADP-ribosylation factor GTPase-activating protein	-0.0248869	0.315297	-0.209124	0.131059	0.972882	0.423526	0.473998	0.695766	10203	11048	11703	11906	9699	8649	12431	15015
C3_00250C	TIM44	Q5A7M2	47.5	Mitochondrial import inner membrane translocase subunit TIM44	0.605212	-0.0373559	0.912139	0.269571	0.0251259	0.981527	0.000281098	0.398019	1544	1829	2606	3165	2887	3538	3785	3619
C3_00260C	BNA4	Q5A7M3	51.5	Kynurenine 3-monooxygenase (EC 1.14.13.9) (Biosynthesis of nicotinic acid protein 4) (Kynurenine 3-hydroxylase)	-0.371597	-1.47096	0.690284	-0.409077	0.817069	0.307527	0.568583	0.773844	182	200	179	156	242	390	211	53
C3_00270C	C3_00270C	Q5A7M4	57.7	Uncharacterized protein	-0.206576	0.582924	-0.319868	0.469633	0.715938	0.314607	0.494546	0.294858	3713	3851	3996	3446	3607	2360	5230	5655
C3_00280C	ULP3	A0A1D8PIW0	101.3	SUMO protease	0.153709	8.51858	-10.0792	-1.71434	0.996969	0.030382	0.0020263	0.665472	152	244	260	238	0	0	158	0
C3_00290W	RPT2	A0A1D8PIV7	48.9	Proteasome regulatory particle base subunit	-0.884271	-0.29739	0.411852	0.998733	0.0428727	0.768114	0.401581	0.0194243	8702	4932	4790	3654	8151	10323	10361	7349
C3_00330W	UTP8	A0A1D8PIX3	78.2	Utp8p	-0.866196	0.142881	0.100924	1.11	0.0823023	0.942989	0.884721	0.0191732	3915	4294	2838	2282	5518	3090	5325	6336
C3_00340W	MZM1	Q5A7N3	13.1	Mitochondrial zinc maintenance protein 1, mitochondrial	-0.152934	-0.115649	0.0441232	0.0814088	0.552588	0.828398	0.880914	0.779313	9864	11075	10717	10581	11068	10540	11480	12403
C3_00350W	TPT1	Q5A7N4	23.6	tRNA 2'-phosphotransferase	-7.27636	0.178735	1.27535	8.73045	0.049859	1	0.769326	0.0149506	0	51	0	0	53	71	94	71
C3_00370C	BUD21	Q5A7N6	25.4	Bud21p	9.55197	-0.179711	10.348	0.6163	5.80724e-08	0.972434	3.09814e-09	0.601454	0	0	173	141	302	167	267	240
C3_00400C	C3_00400C	A0A1D8PIX8	107	PNPLA domain-containing protein	7.39985	-0.469213	10.3612	2.4921	0.0249801	0.978558	0.000814972	0.462371	0	0	74	0	212	280	145	276
C3_00420W	C3_00420W	Q5A7P2	97.4	TRNase Z	1.15399	-0.2173	0.000273103	-1.37102	0.839667	1	1	0.786928	131	0	73	252	53	83	0	139
C3_00450C	C3_00450C	Q5A7P6	41.7	Mitochondrial 54S ribosomal protein RML2	-1.37572	10.7895	-11.4207	0.744538	0.0305632	2.81883e-10	2.02183e-12	0.301127	438	564	184	249	0	0	396	378
C3_00460W	ATP5	Q5A7P7	22.1	F1F0 ATP synthase subunit 5	1.04348	-0.077149	-0.511119	-1.63174	0.00141201	0.967989	0.162388	2.11514e-07	16299	20963	40077	46356	9178	17825	14775	14889
C3_00480C	DOT5	Q5A7P9	29.1	Thioredoxin peroxidase	-0.260922	-0.391487	0.482717	0.352152	0.266952	0.14454	0.0167451	0.103167	19410	20129	18877	18467	22369	34171	22904	27649
C3_00500C	PRP46	Q5A7Q3	43.2	Pre-mRNA-splicing factor PRP46 (Pre-mRNA-processing protein 46)	-0.411159	0.445622	0.937575	1.79436	0.74916	0.854629	0.335094	0.0412793	1191	1071	871	1046	3319	800	3694	3379
C3_00510W	C3_00510W	Q5A7Q4	42.4	Uncharacterized protein	0.376719	1.78454	0.183567	1.59138	0.662572	0.00825509	0.834217	0.00935305	200	120	262	212	209	152	736	770
C3_00520W	C3_00520W	Q5A7Q5	22.2	NEDD8-conjugating protein	3.85045	-0.829578	3.80567	-0.874364	6.0004e-35	0.0536922	4.29875e-34	0.015693	1023	805	12413	17220	10428	15764	7564	9738
C3_00540C	IST1	Q5A7Q7	28.4	Ist1p	0.382635	-0.649046	0.617265	-0.414416	0.464939	0.284233	0.169676	0.407834	829	1043	1408	1352	1601	1245	1224	964
C3_00550C	HRK1	Q5A7Q8	78.5	Putative serine/threonine protein kinase	1.63328	-0.637988	1.28817	-0.983099	0.0227618	0.647593	0.0812556	0.212773	203	95	592	465	267	487	319	243
C3_00560C	SOF1	Q5A7Q9	49.4	rRNA-processing protein	0.158315	-0.342845	0.180095	-0.321065	0.96693	0.964155	0.933876	0.883986	108	250	426	43	124	297	204	177
C3_00570C	C3_00570C	Q5A7R0	49.1	Phosphatase	0.637853	9.51744	-9.15163	-0.27205	0.569995	2.42196e-07	1.52199e-07	0.833884	86	122	168	196	0	0	180	140
C3_00620C	C3_00620C	A0A1D8PIZ2	13.5	Uncharacterized protein	0.388316	-0.0843808	0.255702	-0.216995	0.210679	0.942941	0.427435	0.532729	3412	4152	5700	5497	4302	4798	4198	6028
C3_00640W	C3_00640W	Q5A7S3	55.6	Uncharacterized protein	-9.82368	-0.205686	1.59467	11.2127	1.94498e-09	0.937011	0.00642564	1.04471e-11	159	135	0	0	443	450	524	398
C3_00650W	NGT1	Q5A7S4	56.5	Ngt1p	1.80646	1.89916	1.20445	1.29715	4.19075e-16	5.43014e-17	1.51455e-07	1.64508e-08	1294	1234	5368	4674	3052	2773	11700	14398
C3_00660W	RSE1	Q5A7S5	136.3	Pre-mRNA-splicing factor RSE1	12.0185	0.959431	12.1223	1.06331	2.96562e-13	0.385404	1.87102e-13	0.171313	0	0	961	775	1072	524	1722	2107
C3_00670C	FKH2	Q5A7S7	76.3	Fork-head transcriptional regulator 2	6.80524	-0.572266	8.64813	1.27062	0.0713084	0.974474	0.014164	0.783411	0	0	49	0	65	85	59	60
C3_00720W	PMA1	A0A1D8PJ01	97.5	Plasma membrane ATPase (EC 7.1.2.1)	0.995087	0.342751	0.644569	-0.00776743	7.76481e-14	0.0583021	3.03224e-06	0.985117	97616	95059	225585	209776	152022	150215	227909	230100
C3_00760W	ERG4	A0A1D8PJ25	54.8	Delta(24(24(1)))-sterol reductase	3.41395	0.457838	4.01929	1.06318	0.000121609	0.856426	3.68506e-06	0.299323	6	21	175	150	144	308	319	399
C3_00770C	SCL1	A0A1D8PJ20	27.4	Proteasome endopeptidase complex (EC 3.4.25.1)	0.0672857	-0.254655	0.45371	0.13177	0.949086	0.840309	0.402468	0.855757	2223	1868	2346	2501	1864	3960	2242	3412
C3_00810C	FOX2	A0A1D8PJ13	99.3	Bifunctional hydroxyacyl-CoA dehydrogenase/enoyl-CoA hydratase	0.00873405	-0.31376	-0.328385	-0.650879	1	0.586956	0.362049	0.0449814	5746	6113	7288	6257	3351	6408	4278	4836
C3_00820W	SCT1	A0A1D8PJ38	87.5	Bifunctional glycerol-3-phosphate/glycerone-phosphate O-acyltransferase	0.264805	0.376083	-0.476361	-0.365083	0.631961	0.628749	0.296411	0.460134	754	1232	1321	1368	608	842	1141	1072
C3_00830C	C3_00830C	A0A1D8PJ08	86.3	DNA ligase (EC 6.5.1.1)	0	-0.655065	10.3331	9.85781	1	0.896301	5.66949e-07	2.99033e-06	0	0	0	0	166	325	156	206
C3_00850C	C3_00850C	A0A1D8PJ10	89.6	Uncharacterized protein	-0.225186	0.178718	0.306096	0.710001	0.79202	0.940536	0.661097	0.240253	158997	177129	166419	159048	285367	115783	268848	295028
C3_00880W	KGD1	A0A1D8PJ26	112	Alpha-ketoglutarate dehydrogenase	-0.0110407	0.326573	-0.419605	-0.0819919	0.989439	0.112541	0.00760537	0.710657	65746	69433	77611	74274	41429	61876	74746	77164
C3_00900C	AYR1	A0A1D8PJ12	32.4	Acylglycerone-phosphate reductase	-10.2225	-1.84466	1.74026	10.1181	2.08879e-07	0.367606	0.231341	4.70623e-07	194	194	0	0	156	1246	237	195
C3_00930W	ATO2	A0A1D8PJ42	28.2	Ato2p	-0.526001	0.234851	0.576266	1.33712	0.23492	0.814196	0.168431	0.000325516	3166	1913	2040	1967	3951	3647	5344	5373
C3_00940W	C3_00940W	Q5A9Y7	62.5	Ubiquitin-protein ligase	0.0932551	-1.03621	-0.409817	-1.53928	0.973144	0.523914	0.746429	0.122641	204	340	291	360	124	302	171	66
C3_01000W	BMS1	A0A1D8PJ43	139.2	GTPase	0.0161724	-0.990089	0.577552	-0.42871	1	0.251447	0.412052	0.580528	2476	1854	2469	2493	1612	5220	1856	2054
C3_01030W	ARP9	Q5A9X7	54.6	Arp9p	0.268997	0.39907	-0.00920535	0.120868	0.28446	0.171265	0.981611	0.684376	11368	12051	15208	16634	11675	11676	16669	20155
C3_01080W	MRPL33	A0A1D8PJ23	11.2	Mitochondrial 54S ribosomal protein YmL33	1.5028	0.0697643	1.862	0.428962	0.62278	1	0.489095	0.91011	677	0	1091	1107	1665	753	1455	1685
C3_01120W	C3_01120W	Q5A9X0	39.9	Uncharacterized protein	-0.933524	-0.123289	-0.352661	0.457574	0.0491879	0.957054	0.523956	0.406123	362	371	237	199	316	255	305	327
C3_01130C	C3_01130C	A0A1D8PJ35	98.2	ZZ-type domain-containing protein	1.21457	-0.000245533	1.32059	0.105773	6.31771e-05	1	1.05394e-05	0.829585	2046	3217	7223	6588	6801	6312	7863	7847
C3_01140W	C3_01140W	A0A1D8PJ36	27.3	Thioredoxin domain-containing protein	0.832979	0.336604	1.16628	0.6699	0.895757	0.990339	0.803947	0.907289	136	0	153	126	0	342	171	299
C3_01160W	MSS4	A0A1D8PJ31	81.9	1-phosphatidylinositol-4-phosphate 5-kinase	-0.309154	0.751714	-1.00246	0.0584087	0.865848	0.761438	0.412386	0.983199	377	393	373	332	301	63	438	336
C3_01170W	AIM24	Q59L25	53.3	Altered inheritance of mitochondria protein 24, mitochondrial	-0.917665	0.276105	-1.34721	-0.153441	0.013461	0.748989	0.000107536	0.778333	2362	3886	1852	1877	1028	1470	1796	1757
C3_01190C	C3_01190C	A0A1D8PJ57	53.5	DUF155 domain-containing protein	0.535282	1.03415	-0.139311	0.359553	0.524398	0.272233	0.88631	0.684434	83	139	161	200	100	102	224	270
C3_01210C	C3_01210C	A0A1D8PJ67	34.6	HMG box domain-containing protein	0.00236437	0.637817	-0.541852	0.0936001	1	0.554466	0.441899	0.929541	410	606	810	361	304	404	633	666
C3_01250W	PMC1	Q5AJ65	133.6	Calcium-transporting ATPase (EC 7.2.2.10)	-5.0636	0.109698	-3.07464	2.09866	0.0100917	1	0.145545	0.370774	1064	1213	81	0	67	218	152	198
C3_01280W	C3_01280W	Q5AJ69	24.2	Uncharacterized protein	-1.08248	-1.58919	-0.221495	-0.728208	0.750557	0.768797	0.950572	0.832371	374	411	229	192	335	341	264	0
C3_01300C	NCE103	Q5AJ71	31.6	Carbonic anhydrase (EC 4.2.1.1) (Carbonate dehydratase) (Non-classical export protein 103)	-0.332622	0.261865	0.0748609	0.669348	0.489857	0.773381	0.896171	0.095022	1417	2362	1721	1666	2011	1968	2903	2798
C3_01350C	URA3	P13649	29.9	Orotidine 5'-phosphate decarboxylase (EC 4.1.1.23) (OMP decarboxylase) (OMPDCase) (OMPdecase) (Uridine 5'-monophosphate synthase) (UMP synthase)	-0.194625	0.53724	0.106176	0.838041	0.820694	0.569482	0.892347	0.135489	1478	864	1453	898	1394	1120	2204	2196
C3_01360C	IRO1	Q5AJ77	65.3	Transcription factor IRO1 (Iron utilization protein 1)	1.01791	2.09701	-0.382059	0.697041	0.159005	0.00225848	0.650637	0.361015	356	310	856	680	189	338	1797	811
C3_01390C	GEA2	A0A1D8PJ74	128	Arf family guanine nucleotide exchange factor	-0.713989	0.280342	-1.11067	-0.116335	0.178577	0.82308	0.0187433	0.876809	6623	3112	3407	3342	2089	2495	3354	3238
C3_01400W	END3	Q5AJ82	45	Actin cytoskeleton-regulatory complex protein END3 (Endocytosis protein 3)	-0.151322	0.251267	-0.459496	-0.0569079	0.273176	0.091518	3.35072e-05	0.733334	24866	24758	24899	25619	16655	19870	25561	25938
C3_01410C	ALI1	A0A1D8PJ73	32.6	Ali1p	-0.0531317	0.368981	-0.243113	0.179	0.688775	6.67768e-05	0.0073251	0.0646425	18721	19941	22487	19791	14474	18692	24693	25876
C3_01420C	C3_01420C	Q5AJ84	13.8	SCP2 domain-containing protein	-0.113324	-0.0936472	-0.116441	-0.0967645	0.421459	0.700419	0.375208	0.493667	23385	25677	27433	24022	19751	26252	25327	25488
C3_01430W	RRT14	Q5AJ85	24.9	Regulator of rDNA transcription 14	1.13284	-0.483094	0.587752	-1.02818	0.0167254	0.573666	0.266008	0.0328779	852	687	1855	1963	861	1525	1199	781
C3_01440C	C3_01440C	A0A1D8PJ78	11.4	Uncharacterized protein (Fragment)	-0.622457	-0.592355	-0.305995	-0.275893	0.0728565	0.184436	0.426575	0.499098	34400	24225	22132	21100	17653	31321	19922	17834
C3_01450C	MET18	A0A1D8PJ95	125.1	Met18p (Fragment)	-0.384375	0.364411	-1.42172	-0.67293	0.685208	0.840309	0.0340987	0.400116	3119	3399	2737	2901	1708	634	1765	1991
C3_01460C	FOX3	Q5AJ90	43.8	Fox3p	-1.43529	-0.243091	-1.34481	-0.152611	4.27636e-23	0.33445	2.74866e-20	0.454656	11228	11727	4632	4953	3964	5221	4520	4633
C3_01470W	ARF3	A0A1D8PJ64	19.7	Arf3p	1.26212	9.42932	-7.47264	0.694551	0.791789	0.0150521	0.0315647	0.885794	64	0	89	87	0	0	139	163
C3_01480C	RKI1	Q5AJ92	26	Ribose-5-phosphate isomerase (EC 5.3.1.6) (D-ribose-5-phosphate ketol-isomerase) (Phosphoriboisomerase)	0.531804	-0.829203	0.5907	-0.770307	0.371367	0.230036	0.285025	0.148681	7450	8279	13431	12334	6512	18345	9008	6931
C3_01490W	RPS7A	Q5AJ93	21.2	40S ribosomal protein S7	0.219942	-1.92068	0.17231	-1.96831	0.860357	0.0196224	0.871102	0.00653406	39261	42275	54097	53328	14776	83805	16493	12523
C3_01500C	BZZ1	A0A1D8PJ75	69.5	Bzz1p	-0.319045	0.346349	-0.829553	-0.164159	0.387482	0.507027	0.0047019	0.691761	12488	16407	12646	13471	8806	7353	12845	11876
C3_01520C	C3_01520C	A0A1D8PJ76	40.4	Uncharacterized protein	-0.184401	-0.00730438	-0.326572	-0.149476	0.320621	1	0.0400306	0.432813	25421	24696	26985	23117	19602	20618	21885	25851
C3_01540W	C3_01540W	Q5AJA1	22.6	HIG1 domain-containing protein	-0.01603	-1.46144	4.27645	2.83104	1	0.866275	0.179308	0.425139	0	58	0	61	522	599	210	274
C3_01550C	TOS1	A0A1D8PJA8	49.2	Tos1p	1.51549	1.05995	-0.628801	-1.08434	0.000113135	0.0282582	0.164933	0.00948059	1107	1148	2792	4418	711	757	1946	1694
C3_01560W	C3_01560W	Q5AJA5	87.1	DEAH-box ATP-dependent RNA helicase	-0.220205	-1.22807	1.35272	0.344858	0.837567	0.158085	0.0401376	0.69938	2364	1600	2330	1568	2401	8336	2584	2610
C3_01600W	PPH21	A0A1D8PJ80	40.9	Serine/threonine-protein phosphatase (EC 3.1.3.16)	3.27384	-0.149014	4.28833	0.865477	1.4205e-128	0.621272	4.15849e-221	2.33026e-09	2694	2888	34307	27112	51986	58010	53979	64042
C3_01610W	C3_01610W	A0A1D8PJA6	43.3	NAD(P)-bd_dom domain-containing protein	-1.0943	-0.088684	-1.25776	-0.252147	0.000562764	0.958451	5.04126e-05	0.551818	9799	10111	4910	5603	2954	5651	4727	4656
C3_01620W	C3_01620W	A0A1D8PJ87	21.7	OHCU_decarbox domain-containing protein	-0.310441	0.184323	-1.05535	-0.560589	0.849231	0.973629	0.34284	0.671777	2748	2640	2574	2354	2088	355	2095	1427
C3_01630W	TFP1	Q5AJB1	67.6	V-type proton ATPase catalytic subunit A (V-ATPase subunit A) (EC 7.1.2.2)	-0.261596	-0.115059	0.118466	0.265003	0.0804183	0.704135	0.48165	0.0731911	18008	16406	17828	14821	17866	19842	19958	21441
C3_01680C	C3_01680C	A0A1D8PJ88	42	Uncharacterized protein	-2.00456	-0.355199	1.49512	3.14449	0.650948	0.988123	0.725424	0.411124	153	0	46	0	271	157	154	257
C3_01690W	C3_01690W	A0A1D8PJA1	45.2	Uncharacterized protein	-9.03829	-8.28651	-0.833585	0	0.153622	0.334893	0.9205	1	0	173	0	0	0	106	0	0
C3_01700W	CDC53	Q5AJB7	87.1	Cullin	-0.803367	-0.0558671	0.446248	1.19375	0.086717	0.982804	0.378863	0.00639733	1749	3467	1933	1458	3472	3648	3979	4185
C3_01710C	PPT1	A0A1D8PJ89	64	Serine/threonine-protein phosphatase (EC 3.1.3.16)	1.57862	0.650718	0.35626	-0.57164	0.00191562	0.448551	0.591397	0.35596	654	792	2343	2528	1156	654	1591	1893
C3_01720C	C3_01720C	A0A1D8PJB0	138.1	Coatomer subunit alpha	-0.454014	-0.410889	-0.33618	-0.293055	0.000112254	0.00186742	0.00583592	0.0209603	20473	21339	19165	15541	15873	17519	14527	15341
C3_01730C	UTR2	Q5AJC0	51.7	Extracellular glycosidase UTR2 (EC 3.2.-.-) (Cell-surface factor 4)	-0.107981	-0.0371891	0.323465	0.394257	0.552967	0.958451	0.0206582	0.00441904	3644	3407	3803	3612	3933	5028	5120	5193
C3_01750C	BRO1	Q5AJC1	108.8	Vacuolar protein-sorting protein BRO1 (BRO domain-containing protein 1)	0.538156	-0.577077	0.381946	-0.733287	0.477714	0.609881	0.615436	0.287629	1212	2029	2527	2768	1148	3274	1647	1737
C3_01760W	AFG3	Q5AJC2	88.7	AAA family ATPase	-1.78738	0.0307828	-0.774404	1.04376	8.34856e-10	0.991989	0.015333	0.000875123	1853	2608	847	623	1230	1398	1493	1697
C3_01770C	C3_01770C	Q5AJC3	72.7	Uncharacterized protein	-3.28834	0.0437569	1.19647	4.52857	0.159864	1	0.65933	0.0353976	325	291	0	68	1151	177	863	883
C3_01800C	C3_01800C	Q5AJC5	58.2	Uncharacterized protein	-0.0288621	0.570432	-0.53127	0.0680239	0.998437	0.637814	0.475333	0.956507	270	553	447	461	291	277	417	595
C3_01810C	MNT1	Q00310	50	Glycolipid 2-alpha-mannosyltransferase 1 (EC 2.4.1.-) (Alpha-1,2-mannosyltransferase 1)	0.367139	0.146192	0.0191287	-0.201818	0.175952	0.814494	0.960952	0.506509	19713	20715	29589	29395	15407	26753	26683	27662
C3_01820W	C3_01820W	A0A1D8PJB5	97.4	Beta-glucosidase (EC 3.2.1.21)	-0.448937	-0.485625	0.862337	0.82565	0.330922	0.438643	0.0266904	0.0389184	1390	924	931	989	1751	2557	1640	1976
C3_01830C	MNT2	P46592	54.5	Glycolipid 2-alpha-mannosyltransferase 2 (EC 2.4.1.-) (Alpha-1,2-mannosyltransferase 2)	-0.346327	0.275958	-0.109188	0.513097	0.709571	0.902993	0.912299	0.527137	4752	6584	5118	4957	7381	2715	7050	8190
C3_01850W	C3_01850W	A0A1D8PJB1	39.9	Mitochondrial 37S ribosomal protein MRP1	1.68732	0.266264	2.63532	1.21427	3.70443e-05	0.814196	1.84941e-11	0.00530961	2823	2269	10655	8056	19247	11873	19325	26462
C3_01860C	DBP5	Q5AJD0	60.2	ATP-dependent RNA helicase DBP5 (EC 3.6.4.13)	0.0102543	0.0674612	-0.130416	-0.0732086	0.999855	0.961658	0.704504	0.857145	13543	15933	16479	17043	14397	12424	15597	18234
C3_01890C	C3_01890C	A0A1D8PJA9	49.2	Uncharacterized protein	0.807673	0.00548491	1.2196	0.417417	0.0111431	1	4.13697e-05	0.246842	4501	6494	12464	9413	9726	16548	15287	15455
C3_01960C	POX1-3	Q5AJD9	78.9	Acyl-coenzyme A oxidase	-0.668258	-0.282038	1.11796	1.50418	0.000323191	0.336357	1.52983e-10	7.19959e-18	3440	4050	2992	2366	7966	8374	8077	7931
C3_01980C	TOM6	A0A1D8PJC1	6	Tom6p	1.36994	-0.0790696	0.0469807	-1.40203	1.47876e-05	0.967436	0.931118	1.2016e-05	1972	1605	5868	4666	1399	2408	2264	1930
C3_01990W	RNA1	A0A1D8PJD7	45.9	GTPase-activating protein	-0.581359	-0.340541	-0.608621	-0.367802	0.00476061	0.260871	0.00266216	0.0993232	11027	10410	8522	7733	5589	8827	6581	6736
C3_02000W	RAD50	A0A1D8PJD1	152	MRX complex DNA-binding subunit	-0.170726	-0.026975	-0.263591	-0.11984	0.78934	0.999937	0.602917	0.846851	1071	754	1073	780	683	863	786	1010
C3_02020W	MRD1	Q5AJS6	94.9	Multiple RNA-binding domain-containing protein 1	-0.575437	-0.0478449	0.085794	0.613386	0.202022	0.984482	0.884721	0.15996	2854	4307	3371	2115	4036	3526	4171	4626
C3_02040C	LOC1	Q5AJF1	23.8	60S ribosomal subunit assembly/export protein LOC1	-0.738989	-0.185421	-0.468416	0.0851517	0.198137	0.932343	0.432934	0.923796	390	337	200	289	239	294	258	297
C3_02100W	STE50	A0A1D8PJE4	50.6	Ste50p	-0.0440584	1.23109	0.858919	2.13407	1	0.928697	0.856188	0.626352	47	0	55	0	22	69	120	123
C3_02110W	RPL12	Q5AJF7	17.8	Ribosomal 60S subunit protein L12A	0.155356	0.0242802	-0.257377	-0.388454	0.436411	0.98085	0.132128	0.0160852	134781	162909	191425	183597	106014	147522	150655	152619
C3_02120W	C3_02120W	A0A1D8PJD5	42.8	ACB domain-containing protein	0.184359	2.41185	-0.601394	1.62609	0.981774	0.534795	0.848184	0.563801	83	97	145	89	0	131	317	441
C3_02130W	UTP4	A0A1D8PJD3	85	Utp4p	0.338996	-0.81749	-0.383425	-1.53991	0.6635	0.330186	0.583993	0.00537034	7147	8481	9737	12464	3040	9578	4207	3929
C3_02140C	C3_02140C	A0A1D8PJF0	46.2	Uncharacterized protein	-0.844455	-0.51408	0.250284	0.580658	0.112633	0.563731	0.698422	0.305449	2253	1831	1563	1040	1535	3532	1883	2205
C3_02150C	ERG6	O74198	43	Sterol 24-C-methyltransferase (EC 2.1.1.41) (Delta(24)-sterol C-methyltransferase)	0.639533	-0.325252	0.744784	-0.220002	0.000898824	0.260871	7.22297e-05	0.352411	8861	7809	14721	14685	14193	13839	13217	13537
C3_02160C	C3_02160C	A0A1D8PJE6	84.4	RRM domain-containing protein	-0.70149	-0.104577	-0.351438	0.245475	0.0408433	0.942919	0.35593	0.563801	3899	3488	3115	2080	2214	3743	3231	3229
C3_02170C	LAP41	A0A1D8PJE0	56.7	Metalloaminopeptidase	-1.33671	-0.313631	-0.888784	0.134294	1.63857e-05	0.624739	0.00642564	0.785425	8688	11824	5180	4047	4031	7376	5327	5337
C3_02180C	C3_02180C	A0A1D8PJD2	41.6	Deoxyhypusine synthase	-0.579504	-0.136171	-1.06251	-0.619179	0.00353596	0.787761	7.27095e-09	0.0018564	12915	14031	9423	10893	5799	7282	7270	6788
C3_02190C	C3_02190C	Q5AJG7	16.3	NADH dehydrogenase [ubiquinone] 1 alpha subcomplex subunit	0.346948	0.351951	-0.216713	-0.211711	0.0228333	0.0503347	0.186479	0.207576	8737	9759	14017	12648	6881	9308	12610	11710
C3_02200W	C3_02200W	A0A1D8PJF7	6.7	Uncharacterized protein	-24.3636	0.941599	-1.03006	24.2752	4.30152e-16	0.942919	0.800715	1.72978e-15	235	405	0	0	287	0	327	393
C3_02220W	CAP1	Q5AJU7	55	AP-1-like transcription factor CAP1	-0.201268	-0.0534217	-0.751572	-0.603726	0.178577	0.917794	4.09741e-10	1.27293e-06	16856	16940	17254	16062	9557	10699	12157	11013
C3_02240C	GPA2	A0A1D8PJG1	56.9	Guanine nucleotide-binding protein subunit alpha	0.134832	-0.156352	0.982854	0.691669	0.903868	0.958007	0.112332	0.306084	294	247	381	296	331	785	522	631
C3_02260C	C3_02260C	Q5AJH3	67.1	Cyclin-dependent serine/threonine protein kinase	2.86902	0.286684	3.30435	0.722008	7.61645e-07	0.892705	7.77662e-09	0.326111	224	316	3466	1107	2463	2923	3569	4225
C3_02270W	C3_02270W	A0A1D8PJE5	8.3	Uncharacterized protein	-1.55535	0.57021	-1.57535	0.550216	0.0725377	0.771415	0.0613041	0.607468	13514	2984	3292	3120	3367	2121	4584	5363
C3_02280C	GFA1	P53704	79.2	Glutamine--fructose-6-phosphate aminotransferase [isomerizing] (GFAT) (EC 2.6.1.16) (D-fructose-6-phosphate amidotransferase) (Hexosephosphate aminotransferase)	-0.191499	-0.205768	0.456291	0.442021	0.635843	0.769012	0.147173	0.170301	15508	16333	16410	15187	15344	29835	22079	23333
C3_02320W	ILV2	A0A1D8PJF9	74.3	Acetolactate synthase (EC 2.2.1.6)	-0.498691	0.0175282	-0.490723	0.0254953	0.00026388	0.984095	0.000316718	0.919672	19901	23676	18112	16808	13680	17796	19035	18546
C3_02350W	C3_02350W	A0A1D8PJF3	76.9	Kri1_C domain-containing protein	-1.52443	0.0904924	-2.05094	-0.436013	0.000175314	0.970553	1.67864e-07	0.400012	52505	70319	24046	24161	18402	10571	19666	18070
C3_02370C	ALR1	A0A1D8PJF5	103.3	Mg(2+) transporter	-2.16695	1.32258	-2.99974	0.489791	0.0165906	0.33073	0.000439881	0.691761	1532	2378	488	494	371	93	748	713
C3_02430W	APL2	A0A1D8PJI6	86.2	AP complex subunit beta	0.682951	0.338613	0.854794	0.510456	0.0237499	0.509521	0.00302714	0.106042	754	1094	1844	1521	1532	1844	2544	2510
C3_02450W	HRT1	A0A1D8PJL5	14.2	SCF ubiquitin ligase complex subunit	1.88664	-0.28808	-0.410112	-2.58483	4.06093e-26	0.367762	0.0516835	4.48848e-47	4740	5668	22216	21321	3227	4768	3618	4070
C3_02470C	RPL9B	Q5AEN2	21.7	Ribosomal 60S subunit protein L9B	-0.29354	0.51754	-0.226639	0.584441	0.333064	0.113449	0.452378	0.0242502	59445	59001	61600	48408	55474	45192	86931	86783
C3_02480C	CCP1	Q5AEN1	40.7	Cytochrome c peroxidase, mitochondrial (CCP) (EC 1.11.1.5)	-0.555141	-0.0334076	0.0835476	0.605281	1.20891e-09	0.942089	0.492296	5.97965e-11	28768	28332	23192	20895	28970	32059	34075	36844
C3_02490C	C3_02490C	A0A1D8PJG4	149.7	RSC chromatin remodeling complex ATPase subunit	-1.00424	0.0120383	-0.795253	0.221027	1.11934e-17	0.99363	2.5516e-11	0.12273	16745	16839	9892	9090	8244	11479	11646	11748
C3_02540C	OXR1	Q5AEM5	39.4	Oxidation resistance protein 1	0.543656	1.21966	-0.0686369	0.607372	0.384721	0.0434292	0.932647	0.303177	692	991	1591	1198	965	610	2047	2429
C3_02550C	DCG1	A0A1D8PJG9	26	Dcg1p	1.33653	0.0673212	-0.594815	-1.86402	0.0364502	0.988123	0.413745	0.00220923	464	748	1877	1590	263	568	629	372
C3_02580C	C3_02580C	A0A1D8PJG8	28	KxDL domain-containing protein	0.0843848	-0.452442	0.107555	-0.429272	0.926573	0.586956	0.870755	0.43406	556	389	535	598	419	624	412	483
C3_02590W	APL5	A0A1D8PJJ8	125.1	AP-3 complex subunit delta	0.352244	-0.945738	1.10028	-0.197699	0.569545	0.119466	0.0191899	0.773844	562	829	1253	775	1125	1936	973	877
C3_02600C	SLC1	Q5AEL8	32.2	1-acyl-sn-glycerol-3-phosphate acyltransferase (EC 2.3.1.51)	1.79653	1.00444	-1.02401	-1.8161	0.703565	0.942941	0.824321	0.684611	53	50	234	174	0	56	120	0
C3_02610C	GLX3	Q5AF03	25.8	Glyoxalase 3 (EC 4.2.1.130) (Glutathione-independent glyoxalase)	0.42724	0.33982	-0.50624	-0.59366	0.00452354	0.0704784	0.000499805	4.32952e-05	98729	118876	175323	156284	73805	80413	119904	112131
C3_02670W	C3_02670W	Q5AEK9	29.6	C3H1-type domain-containing protein	-0.801306	-0.505297	-1.55357	-1.25756	0.833107	0.967989	0.591397	0.690052	350	711	335	350	0	398	149	155
C3_02700W	SMC3	A0A1D8PJK7	142.2	Structural maintenance of chromosomes protein	-0.669198	-0.117278	-0.212253	0.339667	0.0109853	0.896301	0.505464	0.25695	4041	3820	2535	3035	3395	3422	3584	3923
C3_02710W	C3_02710W	A0A1D8PJH9	7.6	Uncharacterized protein	0.407759	0.96593	-0.736302	-0.178131	0.535096	0.158085	0.18661	0.813163	201	292	366	372	146	151	292	401
C3_02760C	C3_02760C	A0A1D8PJL3	130	Cytokin_check_N domain-containing protein	-0.652102	0.764969	0.0726572	1.48973	0.259912	0.299545	0.926468	0.00243028	8051	9426	6984	5653	12045	5809	18281	19135
C3_02780W	SES1	Q9HGT6	53	Serine--tRNA ligase, cytoplasmic (EC 6.1.1.11) (Seryl-tRNA synthetase) (SerRS) (Seryl-tRNA(Ser/Sec) synthetase)	-0.284277	-0.0734013	0.260998	0.471873	0.384969	0.956646	0.402049	0.0968756	18305	16065	16702	15325	15273	27209	22434	24561
C3_02810C	FAA21	A0A1D8PJI7	80.3	Medium-chain fatty acid-CoA ligase	0.295409	0.209703	-0.0278607	-0.113567	0.569545	0.85024	0.966617	0.853158	991	1089	1199	1664	894	1179	1209	1624
C3_02820C	NSG2	A0A1D8PJM6	36.7	Uncharacterized protein	0.471673	2.04437	-1.57832	-0.00562403	0.907666	0.613766	0.549802	1	207	220	380	294	0	158	378	328
C3_02920W	C3_02920W	Q5AEI3	14.4	mRNA stability protein	0.0550233	-0.108057	-0.113393	-0.276474	0.898938	0.884671	0.711973	0.300378	15768	18498	19704	20489	16426	15228	16262	18975
C3_02940C	NUO2	Q5AEI1	21.5	Nuo2p	0.517958	0.621314	-0.0223245	0.0810309	0.0175048	0.00980137	0.948123	0.80044	26677	30657	53774	39736	28828	27685	49286	54807
C3_02950C	MET13	Q5AEI0	69.9	Methylenetetrahydrofolate reductase (EC 1.5.1.20)	1.49159	0.385004	1.37333	0.26675	0.000110081	0.623943	0.000403757	0.62178	3482	4951	14059	12774	13115	8323	16926	17201
C3_02960C	KRE5	A0A1D8PJN6	166	Kre5p	4.74644	-0.268612	5.15337	0.138318	9.24309e-27	0.850231	1.86707e-31	0.861093	568	532	18266	15303	10023	31257	19536	19435
C3_03010C	DTD2	A0A1D8PJK2	17.9	D-aminoacyl-tRNA deacylase (EC 3.1.1.-) (EC 3.1.1.96)	-0.32954	0.915443	-0.261404	0.983579	0.740056	0.370084	0.777559	0.176158	338	502	257	486	270	448	872	706
C3_03030C	ECM14	A0A1D8PJK3	54.2	Putative metallocarboxypeptidase	0.00356523	-0.639393	0.281428	-0.36153	1	0.457092	0.680407	0.594211	383	227	378	319	347	405	299	273
C3_03040W	AIP2	A0A1D8PJK5	58.3	D-lactate dehydrogenase	-0.684989	-0.295303	-0.14778	0.241906	0.142995	0.77031	0.801235	0.673818	4286	3989	3194	2659	2366	5417	3902	3390
C3_03080W	C3_03080W	Q5AEG3	47	Uncharacterized protein	-1.71354	-0.841986	-0.219614	0.651937	0.561392	0.928054	0.950813	0.852544	234	181	151	0	122	248	111	128
C3_03090W	USO5	A0A1D8PJR1	71.5	Uso5p	0	1.89893	7.29724	9.37595	1	0.93624	0.247037	0.123458	0	0	0	0	0	64	119	140
C3_03100C	C3_03100C	Q5AEG1	54.2	Uncharacterized protein	0.631739	-7.11364	0.340595	-7.40478	0.96693	0.440408	0.971572	0.250302	0	34	0	56	0	47	0	0
C3_03170W	SEC13	Q5AEF2	33	Protein transport protein SEC13	-0.501268	-0.0178656	-0.534852	-0.0514493	0.217045	1	0.167638	0.936007	8370	11108	7581	7941	4624	9277	7787	8107
C3_03180C	PNP1	A0A1D8PJL8	33.4	Purine nucleoside phosphorylase (EC 2.4.2.1) (Inosine-guanosine phosphorylase)	-0.0633348	0.021317	-0.393965	-0.309313	0.839882	0.988123	0.0409045	0.130773	8183	8357	9321	8621	6477	6126	7459	7859
C3_03210W	C3_03210W	Q5AEE8	37.5	Uncharacterized protein	1.72535	-0.403323	2.57258	0.443906	0.530236	0.973629	0.280633	0.901034	0	103	207	175	226	397	282	266
C3_03250W	C3_03250W	A0A1D8PJN3	168.4	Phospholipid-transporting ATPase (EC 7.6.2.1)	-0.629062	-0.169468	0.738234	1.19783	0.148622	0.902116	0.0675143	0.00172753	1186	916	958	600	1559	2008	1634	2117
C3_03260W	C3_03260W	A0A1D8PJN1	104.5	Cleavage and polyadenylation specificity factor subunit 2 (Cleavage and polyadenylation specificity factor 100 kDa subunit)	-0.425381	-0.803639	-0.0933781	-0.471636	0.584516	0.382746	0.918199	0.527446	252	352	320	194	209	373	194	194
C3_03300C	BBP	Q5AED9	50	Branchpoint-bridging protein	-1.04898	-0.0335054	0.792562	1.80804	0.0245856	0.997236	0.099522	3.04951e-05	840	953	472	506	1836	1223	1677	1962
C3_03320W	RUB1	A0A1D8PJP6	8.5	NEDD8 family protein	1.45197	-0.231677	1.02119	-0.66246	6.45152e-08	0.720575	0.000244293	0.0279612	6644	6572	21462	19544	15161	11421	13912	13467
C3_03330C	CLF1	Q5AED6	83.7	Pre-mRNA-splicing factor CLF1	-1.40148	0.487015	0.107776	1.99627	0.685208	0.971814	0.981372	0.510867	265	167	87	98	429	0	373	412
C3_03340C	C3_03340C	A0A1D8PJR3	10.9	Uncharacterized protein	1.52992	0.173401	0.546964	-0.809551	7.26302e-05	0.908268	0.229193	0.0590937	1337	919	3893	3514	1543	1797	2690	1762
C3_03370C	C3_03370C	A0A1D8PJP0	21.5	Uncharacterized protein	0.657733	0.619921	0.836291	0.798479	0.87749	0.95939	0.800128	0.819886	0	360	377	263	465	142	578	591
C3_03400C	VTI1	A0A1D8PJW1	24.8	V-SNARE protein	0.053884	-0.182319	0.382605	0.146402	0.988089	0.965687	0.694091	0.907289	908	344	803	682	548	1156	974	757
C3_03410C	C3_03410C	Q5AED0	121.2	Glyco_hydro_63 domain-containing protein	0.329549	-0.541657	1.20919	0.337988	0.606786	0.509694	0.00955134	0.580528	14740	14499	20538	21011	18093	53009	28772	26877
C3_03420C	NDE1	Q5AEC9	63.5	NADH-ubiquinone reductase (H(+)-translocating)	-0.259613	0.214346	-0.280712	0.193247	0.442946	0.718892	0.367636	0.579448	9270	7567	9553	6532	5796	8373	9368	9942
C3_03430C	C3_03430C	Q5AEC8	23.6	ESCRT-I subunit protein	8.66469	-10.1839	9.92234	-8.92628	0.000169049	2.57381e-05	1.07889e-05	0.000124994	0	0	96	74	166	195	0	0
C3_03480C	ALT1	A0A1D8PJP4	58.4	Alanine transaminase	4.76304	-0.344222	4.30737	-0.799891	7.8655e-72	0.509633	1.13553e-58	0.0078735	238	227	7338	6969	3436	6049	4635	4052
C3_03510C	C3_03510C	A0A1D8PJP3	80.8	Uncharacterized protein	1.94033	0.495466	2.45204	1.00718	0.45515	0.967436	0.296411	0.728811	84	0	191	179	186	291	352	436
C3_03520C	PRE9	Q5AEB8	27.8	Proteasome endopeptidase complex (EC 3.4.25.1)	0.135347	-0.367762	0.0566168	-0.446492	0.763802	0.438643	0.899659	0.164644	7663	6063	9953	7265	5620	9048	6640	6642
C3_03560W	C3_03560W	Q5AEB4	55	Aminopeptidase	-0.648821	2.43133	0.235981	3.31614	0.404416	0.00011206	0.789522	8.77364e-09	294	452	376	171	508	358	2880	2784
C3_03590W	C3_03590W	A0A1D8PJT2	30.8	Prohibitin	0.0401453	-0.575565	0.0658679	-0.549842	0.996107	0.730723	0.956182	0.566354	5012	5064	5711	5995	1829	9464	4848	3616
C3_03650W	HBR3	Q59SR4	52.6	20S-pre-rRNA D-site endonuclease NOB1	0.418763	0.301314	-0.841655	-0.959105	0.283982	0.651763	0.0108962	0.00381979	5012	7152	7820	10404	3233	3599	5150	4849
C3_03660W	IRS4	Q59SR6	71.7	Increased rDNA silencing protein 4	7.97974	3.80733	7.68984	3.51743	0.100923	0.640329	0.106007	0.498808	0	0	0	100	0	84	1073	188
C3_03670W	C3_03670W	A0A1D8PJR4	77	Uncharacterized protein	-0.0557423	-0.230248	0.992378	0.817873	0.993358	0.964155	0.350282	0.472461	31	56	54	41	103	67	97	79
C3_03680W	C3_03680W	A0A1D8PJQ9	64.8	Sphinganine-1-phosphate aldolase	0.630754	0.0891401	1.17114	0.629522	0.296225	0.977429	0.0233023	0.286765	388	484	611	900	1111	832	1233	1268
C3_03710W	CCC1	Q59SS1	33.3	Ccc1p	0.904514	1.12088	0.382117	0.598481	0.0256524	0.0118095	0.412386	0.172039	1989	2614	5445	4342	1978	4242	7772	7841
C3_03720W	GTT11	A0A1D8PJR2	28.6	Gtt11p	0.0549444	1.00604	0.28328	1.23437	0.995124	0.569482	0.836617	0.264433	1753	1756	2228	1912	3480	534	5074	5209
C3_03740W	C3_03740W	Q59SS6	12	Uncharacterized protein	1.78256	-0.466568	4.4032	2.15407	0.680904	0.98085	0.1825	0.580528	33	0	137	0	467	220	226	390
C3_03760W	C3_03760W	Q59SS8	65.7	Diacylglycerol O-acyltransferase	0.804962	-0.25992	1.35461	0.289729	0.344197	0.92914	0.0647723	0.779313	126	61	194	178	257	222	233	248
C3_03770C	C3_03770C	Q59SS9	33	Uncharacterized protein	0.0417062	0.752056	-0.808652	-0.0983023	0.959785	0.0576957	0.0128234	0.846218	36948	35215	43258	40923	24142	16522	41460	41748
C3_03790W	MEU1	Q59ST1	37.6	S-methyl-5'-thioadenosine phosphorylase (EC 2.4.2.28) (5'-methylthioadenosine phosphorylase) (MTA phosphorylase) (MTAP) (MTAPase)	0.122822	-0.269556	-0.337208	-0.729586	0.579783	0.271046	0.0505869	3.56418e-06	4251	4895	5668	5593	3447	3852	3667	3524
C3_03800W	PTR22	Q59ST2	64.4	Ptr22p	0	-23.3464	23.2782	0	1	3.56001e-05	9.35188e-06	1	0	0	0	0	0	350	0	0
C3_03810W	RAD53	A0A1D8PJZ1	78.3	Serine/threonine-protein kinase RAD53 (EC 2.7.12.1)	1.24281	1.05347	2.91436	2.72503	0.350398	0.612385	0.00704649	0.0138973	86	65	349	70	763	343	887	1967
C3_03850C	SOL1	Q59ST9	26.7	Sol1p	-4.20436	0.00456713	-4.19491	0.014017	9.74093e-77	1	4.38465e-76	0.985117	12946	11255	724	761	624	712	679	915
C3_03870C	SAP9	Q59SU1	58.4	Candidapepsin-9 (EC 3.4.23.24) (ACP 9) (Aspartate protease 9) (Secreted aspartic protease 9)	0.174693	0.100887	-0.0680186	-0.141825	0.444338	0.839984	0.792111	0.540905	6136	6907	8170	8459	6155	6344	7880	8107
C3_03880C	PEP8	A0A1D8PJS7	39.4	Retromer subunit	0.590467	1.20143	1.05786	1.66882	0.627852	0.385404	0.29222	0.0736438	212	68	260	222	225	378	1044	566
C3_03910W	HTA1	Q59SU5	14	Histone H2A.1	-2.34061	-2.08368	-0.384303	-0.127369	0.0697749	0.222686	0.823232	0.960489	669	490	115	143	103	860	178	72
C3_03920W	C3_03920W	A0A1D8PJT6	8.1	Uncharacterized protein	9.35343	10.4584	0	1.0935	1.23902e-05	3.37571e-06	1	0.583807	0	0	165	110	0	0	388	225
C3_03980C	C3_03980C	A0A1D8PJU8	58.3	DUF3533 domain-containing protein	13.2417	1.26378	8.89746	-3.08042	1.37004e-05	0.894067	0.00546038	0.350653	0	0	4034	192	0	194	251	254
C3_04000C	CTN3	Q59MQ8	101	Carnitine O-acetyltransferase	2.07676	-0.46729	1.48324	-1.0608	1.7046e-31	0.0533056	3.92185e-16	9.09464e-09	486	467	2257	2291	1246	1448	1146	1165
C3_04060C	HEM13	Q59MR4	36.9	Coproporphyrinogen oxidase	-0.354005	0.136824	-0.310127	0.180702	0.288494	0.876843	0.343253	0.632623	14564	15304	14697	11876	13469	10425	15471	16283
C3_04080W	C3_04080W	A0A1D8PJT8	16	Ubiquinol--cytochrome-c reductase subunit 6	0	0.446873	3.88222	4.50887	1	0.996029	0.591313	0.534507	0	0	0	0	5	0	0	9
C3_04090W	SBP1	Q5ANP6	31.9	Sbp1p	0.70836	0.188858	0.424179	-0.0953238	3.74251e-14	0.190633	1.44907e-05	0.461858	36339	35519	66864	66033	44016	53680	66810	64929
C3_04130W	C3_04130W	Q5ANP3	39.7	zinc_ribbon_10 domain-containing protein	-0.0269389	-1.00443	1.42103	0.44354	0.989165	0.0237876	9.14792e-05	0.328259	1631	1984	2138	1884	3368	6639	2473	3317
C3_04140C	EGD2	Q5ANP2	19.5	Nascent polypeptide-associated complex subunit alpha (NAC-alpha) (Alpha-NAC)	0.0721285	-0.15349	-0.436828	-0.662446	0.816756	0.706874	0.0202319	0.000247239	287235	293924	332268	357549	219308	210812	226360	236450
C3_04180W	KRE9	Q5ANN9	29.1	Kre9p	0.64579	-0.62912	0.701291	-0.57362	0.0215477	0.060814	0.0102965	0.0458267	1128	1477	2412	2202	1804	2505	1749	1525
C3_04220C	URK1	Q5ANN6	62	Uridine kinase (EC 2.7.1.48)	-0.260417	0.725439	-1.11212	-0.126267	0.800735	0.517573	0.100986	0.908302	633	610	856	344	271	310	666	471
C3_04250W	WSC1	A0A1D8PJZ5	37.4	Wsc1p	0.561891	0.325225	-0.342285	-0.578951	0.624275	0.920682	0.770131	0.596584	247	810	812	935	506	307	577	668
C3_04270C	CTP1	A0A1D8PJV4	31.4	Ctp1p	0.67498	-1.16825	-0.39393	-2.23716	0.468885	0.28179	0.685601	0.00214776	416	365	759	658	145	483	136	182
C3_04290C	SNF5	A0A1D8PJZ6	78.1	Snf5p	0.139519	-2.2655	2.41742	0.0124006	0.912664	0.000752827	7.10937e-05	0.999517	108	63	98	115	440	484	130	98
C3_04300C	POL1	A0A1D8PK28	167.5	DNA polymerase (EC 2.7.7.7)	1.06038	1.4077	1.74209	2.08941	0.774221	0.820444	0.549802	0.472484	280	298	1436	0	1446	397	2442	3725
C3_04330C	C3_04330C	A0A1D8PJW6	14.4	Uncharacterized protein	2.14778	-0.468494	-0.978219	-3.59449	0.137922	0.933758	0.54441	0.00594701	319	368	3398	205	144	212	178	123
C3_04340W	ATF1	A0A1D8PJW9	56.9	Atf1p	0.0496633	-0.14786	0.0698341	-0.127689	0.901033	0.771454	0.815632	0.652756	2348	2276	2666	2746	2058	2891	2699	2551
C3_04380C	SNU13	Q5ANL6	13.6	13 kDa ribonucleoprotein-associated protein	2.73606	-0.140055	2.17432	-0.701802	1.71455e-106	0.612451	3.257e-67	2.23202e-07	9526	8913	68831	70148	40381	43489	45456	45117
C3_04400C	NUP85	Q5ANL4	89.6	Nuclear pore complex protein Nup85	0.170158	-0.228153	-0.102354	-0.500665	0.677175	0.719399	0.800426	0.102424	890	1173	1313	1309	929	1004	992	971
C3_04410C	C3_04410C	Q5ANL3	124.3	Uncharacterized protein	-2.12811	1.86233	-2.55864	1.4318	0.63624	0.834822	0.518581	0.760499	209	279	0	120	76	0	255	103
C3_04430W	RIP1	A0A1D8PJX3	23.2	Cytochrome b-c1 complex subunit Rieske, mitochondrial (EC 7.1.1.8)	2.08977	0.688547	1.39985	-0.00137519	2.31207e-38	0.000268245	2.30309e-17	1	1738	1578	8361	7654	4295	4515	7814	9121
C3_04460W	C3_04460W	Q5ANK4	112.2	zinc_ribbon_16 domain-containing protein	9.13335	0.379476	9.27897	0.52509	0.0100446	0.984095	0.00779536	0.92347	0	0	99	133	210	0	158	199
C3_04470W	PKC1	Q5ANK2	125.2	Protein kinase C (EC 2.7.11.13)	0.920495	-1.05584	-0.664766	-2.6411	0.251162	0.306244	0.413831	6.64356e-05	29726	29510	62009	64707	6548	33454	12383	9113
C3_04490W	RAX1	Q5ANJ8	63.5	Rax1p	-1.59239	0.21161	-0.649699	1.1543	0.0167795	0.942919	0.398319	0.101396	3240	2817	1121	1152	2702	1022	2687	2677
C3_04500C	RPL19A	A0A1D8PK40	21.9	Ribosomal protein L19	-0.23045	-0.854781	0.285368	-0.338963	0.589656	0.0187184	0.452603	0.37435	23052	18900	22052	18629	18394	34484	18475	15411
C3_04510W	C3_04510W	Q5ANJ6	11.8	Uncharacterized protein	0.0114944	0.615234	-1.21759	-0.613847	1	0.315284	0.00208009	0.170791	610	797	844	762	322	281	492	619
C3_04520C	ADE2	Q92210	62.4	Phosphoribosylaminoimidazole carboxylase (EC 4.1.1.21) (AIR carboxylase) (AIRC)	-0.313969	0.1001	-0.0860479	0.328021	0.512046	0.958007	0.875059	0.474253	2763	2355	2679	2017	1762	3217	3408	2784
C3_04530C	TEC1	Q5ANJ4	83	Transcription activator TEC1	9.12409	0.107825	7.18019	-1.83607	0.0906714	1	0.190234	0.792674	0	0	93	137	0	59	0	70
C3_04550C	CMK1	Q5ANJ0	46.8	Protein kinase	-3.43437	-1.30457	-1.28698	0.842823	0.154708	0.814494	0.643889	0.791888	370	525	0	89	97	288	76	102
C3_04560W	MAK21	Q5ANI8	121.6	RNA-binding ribosome biosynthesis protein	-0.224121	-0.1182	0.295556	0.401476	0.573335	0.919452	0.401581	0.239036	1765	2631	2268	1993	2319	3161	3037	2905
C3_04590W	C3_04590W	A0A1D8PK11	24	RNA-binding protein	-0.0191312	0.405475	-1.02179	-0.597184	0.998819	0.627707	0.0180686	0.219618	15523	22924	18342	24179	6195	13435	14805	15191
C3_04610W	MEA1	Q5ANI4	72.6	Mea1p	-3.52692	0.0642784	-2.17073	1.42047	7.77174e-08	0.99363	0.00159876	0.0605924	1214	827	124	79	179	287	173	400
C3_04620C	C3_04620C	Q5ANI3	15.6	Uncharacterized protein	0.174717	-0.915052	1.33993	0.250158	0.905956	0.494352	0.104376	0.833548	1267	782	1306	1318	1000	4551	1669	1638
C3_04630W	C3_04630W	Q5ANI2	39.5	Uncharacterized protein	-2.54543	0.976501	-5.56338	-2.04145	0.421938	0.923439	0.0307395	0.529281	10362	9248	1278	2465	0	459	327	657
C3_04670C	RPS15	A0A1D8PK22	15.9	Ribosomal 40S subunit protein S15	0.0930616	0.279739	-0.632072	-0.445394	0.888194	0.715596	0.0837925	0.264961	168985	219754	242315	226783	147969	98842	175698	188915
C3_04680W	RPP2B	Q5ANH5	11.2	Ribosomal protein P2B	-0.159638	-0.373529	-0.614933	-0.828823	0.659095	0.342762	0.0169466	0.000960101	235076	209761	219286	231002	158243	131018	136416	132487
C3_04690C	C3_04690C	Q5ANH4	39.4	Uncharacterized protein	0.022141	-1.41684	-0.0433986	-1.48238	0.998546	0.0103741	0.955752	0.00231557	226	232	294	235	188	265	82	118
C3_04700W	C3_04700W	Q5ANH3	36.3	FG-nucleoporin	0.120938	-0.444699	-0.224568	-0.790205	0.78173	0.270542	0.503293	0.00398244	1044	1390	1523	1469	998	1099	899	933
C3_04750W	C3_04750W	Q5ANG8	68.3	Uncharacterized protein	-10.9854	-8.84855	-2.2187	0	3.92067e-07	0.000254692	0.220433	1	231	430	0	0	86	53	0	0
C3_04760C	SEN1	Q5ANG6	227.7	Putative DNA/RNA helicase	-1.45414	-0.182452	0.332082	1.60377	0.00513468	0.937011	0.620479	0.00191764	2793	2899	1741	663	3674	3501	3693	3877
C3_04780C	C3_04780C	Q5ANG2	39.4	Uncharacterized protein	0.605314	-0.305554	1.38386	0.472989	0.888194	0.981527	0.635263	0.901479	0	106	89	91	118	160	160	104
C3_04810C	C3_04810C	A0A1D8PK71	29.1	HABP4_PAI-RBP1 domain-containing protein	0.93638	0.665919	0.601667	0.331206	0.0115799	0.190633	0.1295	0.468696	31352	40026	105406	51619	54426	54099	100362	105395
C3_04820C	SEC7	Q5ANF9	208.9	Arf family guanine nucleotide exchange factor	0.406837	0.326508	-0.679327	-0.759657	0.0720797	0.299545	0.000862804	0.000204225	38298	47110	62184	65578	25590	28109	43433	36524
C3_04830C	FAS2	A0A1D8PK65	207.2	Fatty acid synthase subunit alpha (EC 2.3.1.86) [Includes: 3-oxoacyl-[acyl-carrier-protein] reductase (EC 1.1.1.100); 3-oxoacyl-[acyl-carrier-protein] synthase (EC 2.3.1.41)]	-0.0284819	0.10312	0.0142078	0.14581	0.937737	0.81209	0.957872	0.483361	96652	88950	112585	94328	77811	113773	122315	119106
C3_04860W	SFP1	Q5ANF0	50.6	Zinc-coordinating transcription factor	-0.732432	-0.125561	0.111613	0.718484	0.853869	1	0.979982	0.841578	66	99	118	0	72	110	110	85
C3_04880W	PIN3	Q5ANE7	31	Pin3p	0.296333	0.090567	-0.256213	-0.461978	0.554092	0.967436	0.597908	0.299875	40514	42801	58268	57482	42815	25589	43453	45589
C3_04900W	NOP14	Q5ANE4	97.3	SnoRNA-binding rRNA-processing protein	3.32489	0.119903	1.97839	-1.2266	3.84647e-06	0.98085	0.0100452	0.147395	592	143	3880	4487	1284	1683	1880	1923
C3_04920C	C3_04920C	Q5ANE2	27.3	ANK_REP_REGION domain-containing protein	-0.198243	-0.255343	0.164375	0.107275	0.536007	0.569482	0.597191	0.762017	2493	2700	3050	2115	2679	3209	2687	3162
C3_04940W	C3_04940W	Q5ANE0	40	Ditrans,polycis-polyprenyl diphosphate synthase	-7.66337	0.422842	0.516017	8.60223	0.0435602	0.981806	0.918294	0.0206193	65	0	0	0	35	62	85	66
C3_04960W	RPL35	A0A1D8PK30	14.1	Ribosomal 60S subunit protein L35A	-0.0648411	-0.286764	-0.589362	-0.811286	0.931441	0.723338	0.133179	0.0309724	79987	100802	97383	97848	41271	83034	68386	49216
C3_04970C	C3_04970C	Q5AND8	123.5	Ubiquitin-ubiquitin ligase	-2.8529	0.424037	-2.98572	0.291212	9.39942e-08	0.760404	2.04171e-08	0.721479	9448	11614	1710	1590	1691	902	2765	1486
C3_04990W	FGR44	Q5AND6	46.8	Fgr44p	0.0176878	0.419838	-0.110631	0.291519	0.99602	0.422479	0.807569	0.464506	1069	1320	1233	1487	926	1329	1695	1851
C3_05000W	RDI1	Q5AND4	22.9	Rdi1p	-0.106189	-0.0579008	0.153975	0.202263	0.895757	0.981527	0.800426	0.741282	92989	98650	104074	97603	136361	71592	117477	128141
C3_05010C	C3_05010C	Q5AND3	98.3	DNA helicase	0.682696	-1.17725	-0.0696965	-1.92965	0.480718	0.295487	0.954233	0.0119756	3546	4861	7059	8123	1359	7207	2106	2132
C3_05030W	PHB2	Q5AND0	34.1	Prohibitin	1.37386	-0.0338367	1.49354	0.0858393	1.86744e-08	0.982804	7.28277e-10	0.833884	18460	18273	53520	54158	57306	45428	56769	64474
C3_05070W	CEM1	Q5ANC6	47.1	3-oxoacyl-[acyl-carrier-protein] synthase	0	0.922166	9.10387	10.2058	1	0.973629	0.0941863	0.059789	0	0	0	0	186	0	287	171
C3_05100C	RPL18	A0A1D8PK43	20.8	Ribosomal 60S subunit protein L18A	1.11455	-0.630245	1.66903	-0.0757668	8.8382e-08	0.0140774	1.50228e-16	0.826501	5841	6097	17553	11966	15880	22863	14765	14626
C3_05120C	C3_05120C	A0A1D8PK48	21.8	Prefoldin subunit 3	-0.298113	-0.79301	-0.587582	-1.08248	0.462449	0.0358735	0.0804862	0.000514964	10638	9136	10685	7680	4832	8752	4709	4399
C3_05140C	C3_05140C	Q5ANB6	54.5	tRNA (Guanine-N2-)-methyltransferase	2.14952	0.378121	-0.482377	-2.25378	0.0249995	0.917794	0.699686	0.0183166	368	93	1252	1088	121	222	324	192
C3_05150W	C3_05150W	Q5ANB5	51.6	Uncharacterized protein	-0.91156	0.683435	-0.700793	0.894202	0.266952	0.608766	0.39507	0.268174	7986	8116	4755	4920	7336	2125	9295	9782
C3_05180W	RHB1	Q5ANA9	21.1	Putative GTPase	-0.691946	-0.341852	0.830908	1.181	0.408725	0.862031	0.271956	0.0996912	403	257	311	160	422	794	639	472
C3_05190C	MCA1	Q5ANA8	49.2	Metacaspase-1 (EC 3.4.22.-)	0.251771	-0.495774	0.665027	-0.0825187	0.726325	0.580097	0.214503	0.922915	4365	4789	6134	6187	3976	11259	6067	6268
C3_05200W	RPS19A	A0A1D8PK61	16.1	Ribosomal 40S subunit protein S19A	1.10274	-0.747478	0.339943	-1.51028	0.0307376	0.315284	0.589494	0.00201107	51888	62370	135664	141333	36814	115468	54166	48890
C3_05210C	DYN1	A0A1D8PK53	478.5	Dynein heavy chain	0.152589	-9.8299	-0.686201	-10.6687	0.945379	2.80169e-07	0.589191	5.03104e-09	200	250	250	312	72	222	0	0
C3_05220W	CDR1	Q5ANA3	169.9	Pleiotropic ABC efflux transporter of multiple drugs CDR1 (Pleiotropic drug resistance protein CDR1)	0.761182	-0.302307	1.17562	0.112134	3.84208e-09	0.0897811	6.8738e-21	0.536752	6537	6301	12675	11983	13834	15432	13016	15216
C3_05240C	RPL8B	Q5ANA1	28.5	Ribosomal 60S subunit protein L8B	-0.360998	-0.222916	0.152054	0.290136	0.0157699	0.31449	0.375776	0.0621319	156052	138256	135362	124641	159916	169496	170497	165582
C3_05280C	C3_05280C	Q5AN96	40.6	Elongation of fatty acids protein (EC 2.3.1.199) (Very-long-chain 3-oxoacyl-CoA synthase)	-2.84253	2.21721	-2.5599	2.49985	0.279612	0.597267	0.317474	0.347248	968	881	127	163	0	347	1412	320
C3_05310W	USO6	A0A1D8PK69	128.6	Uso6p	0.137452	-0.310042	-0.168375	-0.615869	0.72288	0.489493	0.614393	0.0214114	21280	23429	30069	25753	14682	26304	19974	18447
C3_05350C	SMI1B	A0A1D8PK79	61.9	Smi1bp	0.173127	-0.40246	0.339567	-0.23602	0.83535	0.714493	0.591946	0.738948	245	281	309	359	241	445	306	297
C3_05370C	RPS0	O42817	28.7	40S ribosomal protein S0	-4.20855	0.271363	-4.9784	-0.49848	3.03632e-55	0.678052	8.44791e-77	0.143083	57142	57817	4475	2651	1615	2089	2982	2283
C3_05410W	C3_05410W	A0A1D8PK91	85.2	Uncharacterized protein	0.289908	0.0100757	0.197038	-0.0827942	0.78453	1	0.835435	0.949078	470	552	412	972	597	576	700	713
C3_05440C	AIM23	Q59YU1	49.9	Altered inheritance of mitochondria protein 23, mitochondrial	0.528404	0.390368	-1.06041	-1.19844	0.335801	0.685915	0.0214738	0.00953819	2414	3657	4832	5038	1678	1192	2594	1958
C3_05460W	C3_05460W	A0A1D8PKB2	84.6	Aa_trans domain-containing protein	0.981612	0.297632	-0.104604	-0.788584	0.000414881	0.580388	0.800426	0.00664921	659	754	1490	1656	559	779	991	943
C3_05520C	DNM1	A0A1D8PKC9	97.8	Dynamin-related GTPase	-0.230352	-0.154769	0.564974	0.640558	0.169352	0.569482	5.18218e-05	4.80413e-06	3518	3781	3759	3300	4987	5935	6103	5510
C3_05530W	OST1	A0A1D8PK87	54.2	Dolichyl-diphosphooligosaccharide--protein glycosyltransferase subunit 1	-0.605535	0.182338	-0.381817	0.406057	0.0110282	0.73625	0.135037	0.112105	10806	10823	9547	6680	8497	8133	10888	11704
C3_05540C	C3_05540C	A0A1D8PKA1	12.4	RRM domain-containing protein	-0.494252	-0.104978	-0.0306842	0.35859	0.673871	0.982804	0.984203	0.763082	242	238	176	208	195	285	385	135
C3_05560W	PRE3	A0A1D8PK85	23.3	Proteasome core particle subunit beta 1	-0.422209	-0.142059	-0.543503	-0.263354	0.000532081	0.526265	3.93035e-06	0.0467876	14028	12814	11918	10814	8501	10149	10204	9808
C3_05580C	GAP2	A0A1D8PK89	63.5	General amino-acid permease GAP2	-1.61901	-2.23139	-0.0396089	-0.651982	0.00162051	2.66084e-05	0.963494	0.294732	453	666	236	178	427	687	113	165
C3_05590C	BAT22	A0A1D8PKB9	40.8	Branched-chain-amino-acid aminotransferase (EC 2.6.1.42)	-0.229768	-0.235975	0.362412	0.356205	0.213478	0.338946	0.0268381	0.0330403	24470	24350	24167	22995	31829	31109	30843	33077
C3_05650W	YCK2	A0A1D8PKB4	56.4	Serine/threonine protein kinase	0.853198	1.44466	-0.496291	0.0951675	0.000201775	2.41709e-10	0.0452021	0.789553	4347	5162	9382	10000	3446	3301	10129	11870
C3_05680W	C3_05680W	A0A1D8PKG7	28.2	E2 ubiquitin-conjugating protein	-0.324565	0.0636432	0.0485693	0.436778	0.600006	0.981527	0.946995	0.435741	853	529	665	591	746	688	834	964
C3_05700W	CHS4	A0A1D8PK97	82.8	Chs4p	-3.07077	0.963168	-2.48242	1.55151	9.76566e-35	0.00149457	4.10241e-23	6.10312e-09	2508	2548	376	308	474	431	1032	1083
C3_05710W	RCT1	A0A1D8PKD1	20.5	Rct1p	0.0765634	-0.131506	1.47599	1.26792	0.909388	0.926666	5.09541e-06	0.000155	11450	10808	12420	14061	34619	26836	27671	40306
C3_05760W	C3_05760W	A0A1D8PKB0	40.2	Phosphopantothenate--cysteine ligase	0.363463	0.428364	-0.307649	-0.242749	0.491627	0.569482	0.54637	0.66519	2650	3540	4851	4176	1624	3566	4023	4030
C3_05770C	SAM50	A0A1D8PKC1	58	SAM complex subunit	0.0487094	0.0263918	-0.704073	-0.726391	0.946542	0.996161	0.0332145	0.0300832	2475	2415	3036	2704	1637	1351	2002	1658
C3_05800W	C3_05800W	A0A1D8PKA3	55.3	tRNA splicing endonuclease subunit	1.20932	0.0196431	0.169577	-1.0201	0.14223	1	0.877628	0.219618	126	76	201	323	93	140	136	141
C3_05830W	KRE6	A0A1D8PKB6	82.4	Beta-glucan synthesis-associated protein	-0.0515866	-1.77336	-0.760047	-2.48182	0.991949	0.0860874	0.431217	0.00219017	660	595	551	807	181	602	164	95
C3_05870C	UBP1	A0A1D8PKC4	90.4	Ubiquitin carboxyl-terminal hydrolase (EC 3.4.19.12)	-0.19899	0.00742607	0.597625	0.804041	0.566738	1	0.0240731	0.0018687	1227	1264	1197	1255	1936	1839	2144	2401
C3_05880C	C3_05880C	A0A1D8PKD0	56.6	Uncharacterized protein	-0.614847	-0.66743	-0.476335	-0.528917	0.0887011	0.130291	0.195175	0.150848	4703	5894	3820	3989	3243	4509	3409	2315
C3_05940C	C3_05940C	A0A1D8PKC7	23.5	Uncharacterized protein	21.3329	-0.593038	23.092	1.16606	2.86124e-06	0.982804	3.27585e-07	0.874691	0	0	105	0	0	330	119	118
C3_05950W	C3_05950W	A0A1D8PKH6	87	Uncharacterized protein	-0.331903	0.144487	-0.307941	0.16845	0.0109853	0.529743	0.0180442	0.25695	85012	84355	78455	74013	66808	70916	93557	87642
C3_05970C	HAL3	A0A1D8PKD2	58.6	Phosphopantothenoylcysteine decarboxylase complex subunit	0.256957	0.207436	-0.512313	-0.561835	0.429973	0.719399	0.0585209	0.0374176	1971	1695	2480	2481	1125	1491	1582	1985
C3_06010W	CAM1	A0A1D8PKC3	47	Translation elongation factor EF1B gamma	-0.25122	-0.0913838	0.575894	0.73573	0.0226409	0.688915	4.57938e-09	6.3483e-14	58805	56507	57807	52119	81299	92305	90949	102682
C3_06020W	MNN9	P53697	42.8	Mannan polymerase complex subunit MNN9	1.39821	-3.1411	2.4703	-2.06901	0.264524	0.00861164	0.0222856	0.0686937	1214	726	1743	3949	1156	10540	847	615
C3_06030W	NOG1	A0A1D8PKD3	73.5	Nucleolar GTP-binding protein 1	0.123615	-0.10842	0.405868	0.173833	0.694766	0.869013	0.0746586	0.532574	5027	5730	6803	6462	7400	6844	8020	7811
C3_06050C	C3_06050C	A0A1D8PKI6	33.1	Uncharacterized protein	0.295841	0.214701	0.372124	0.290985	0.335801	0.688915	0.185457	0.330866	490	572	750	725	617	776	899	1013
C3_06060W	ELP3	A0A1D8PKD5	62.3	Elongator complex protein 3 (EC 2.3.1.-)	-1.33496	0.177129	-0.492232	1.01986	4.09859e-06	0.834822	0.141652	0.000808012	1094	1553	618	569	848	1056	1302	1242
C3_06070C	PBS2	A0A1D8PKE2	59.3	Mitogen-activated protein kinase kinase	-0.856334	0.343617	-0.870858	0.329093	0.00534689	0.53273	0.00412806	0.375884	7534	7633	4725	4751	4666	3557	5979	6646
C3_06090C	OCH1	Q5A4E3	44.8	Initiation-specific alpha-1,6-mannosyltransferase (EC 2.4.1.232) (Outer chain elongation protein 1)	2.71472	0.0982423	3.37571	0.759233	0.223607	1	0.10271	0.791888	59	0	235	210	309	314	328	470
C3_06100C	DED1	Q5A4E2	72.8	ATP-dependent RNA helicase DED1 (EC 3.6.4.13)	0.439683	-1.06961	1.79265	0.283363	0.419073	0.0370026	9.46872e-06	0.624302	7955	6834	13675	9264	15436	38150	14082	15228
C3_06120C	GDA1	Q8TGH6	65.9	Guanosine-diphosphatase (GDPase) (EC 3.6.1.42)	0.308518	-0.00573057	0.488505	0.174257	0.159005	1	0.0116462	0.467788	1201	1333	1974	1593	1690	1896	2028	2217
C3_06200C	MMS21	A0A1D8PKF6	31.3	SUMO ligase	2.45142	-0.0366157	1.82239	-0.665641	1.8085e-08	0.996933	5.15402e-05	0.201898	113	76	542	626	304	375	389	394
C3_06230W	CYM1	Q5A301	117.5	Mitochondrial presequence protease (EC 3.4.24.-)	0.806208	-0.215701	2.12102	1.09911	0.0364363	0.828549	2.5204e-10	0.00260691	503	630	1263	989	2731	2157	2364	2722
C3_06250W	ERV25	Q5A302	24.5	Endoplasmic reticulum vesicle protein 25	-0.332235	-0.0447476	-0.398585	-0.111098	0.443145	0.982804	0.310268	0.833306	7474	10830	9173	7330	7595	6180	8608	7473
C3_06280W	C3_06280W	A0A1D8PKG0	36.1	L-serine/L-threonine ammonia-lyase	-0.395424	0.311324	-0.80936	-0.102612	0.22514	0.546262	0.0037681	0.810345	1441	1633	1288	1351	834	935	1439	1164
C3_06300W	DOT1	Q5A309	155.6	Histone-lysine N-methyltransferase, H3 lysine-79 specific (EC 2.1.1.43) (Histone H3-K79 methyltransferase) (H3-K79-HMTase)	-0.185562	0.195517	-0.378907	0.00217262	0.895757	0.961842	0.707825	1	261	382	286	349	309	174	247	433
C3_06330W	TSA1B	P0CU34	21.8	Peroxiredoxin TSA1-B (EC 1.11.1.15) (Thiol-specific antioxidant protein) (Thioredoxin peroxidase)	0.124086	0.831439	-0.146238	0.561114	0.351486	1.49339e-16	0.232307	3.97793e-08	210053	208945	285670	233599	180127	201960	406340	401228
C3_06350W	MED6	Q5A2Z1	29.2	Mediator of RNA polymerase II transcription subunit 6 (Mediator complex subunit 6)	-0.63675	0.788711	-1.23011	0.195348	0.569995	0.634805	0.186352	0.887719	1110	1322	482	1247	251	843	961	1187
C3_06360C	CYP5	A0A1D8PKL0	22.3	Peptidyl-prolyl cis-trans isomerase (PPIase) (EC 5.2.1.8) (Fragment)	0.219715	-0.0201794	-0.535478	-0.775373	0.00725936	0.967232	3.59593e-13	2.50321e-26	34098	36763	48540	44954	22053	27502	28917	28846
C3_06370C	C3_06370C	A0A1D8PKG5	44.2	Uncharacterized protein	3.74594	-1.03434	2.93408	-1.8462	3.16136e-37	0.00427306	6.48048e-23	1.95217e-09	284	393	5033	5214	2662	2508	1653	1365
C3_06380W	NSA2	Q5A2Y7	29.6	Ribosome biogenesis protein NSA2	-0.180107	0.332849	0.0111795	0.524135	0.841284	0.812787	0.993853	0.426932	6886	6636	6919	6603	9183	4022	10531	10041
C3_06410C	C3_06410C	A0A1D8PKN1	38.3	Dolichyl-diphosphooligosaccharide--protein glycotransferase	9.16175	0.162508	9.99246	0.99322	6.45152e-08	0.967989	2.69972e-09	0.230229	0	0	115	123	159	223	211	293
C3_06430W	APN1	A0A1D8PKJ7	40.9	DNA-(Apurinic or apyrimidinic site) lyase	-0.318755	0.432398	-0.698385	0.0527683	0.420742	0.387291	0.0298983	0.924714	2717	2571	2803	2034	1426	1889	3040	2221
C3_06440W	C3_06440W	A0A1D8PKH4	110.3	FG-nucleoporin	0.581124	-0.0909798	-0.0328026	-0.704906	0.0545557	0.942919	0.942944	0.0156696	10926	13815	23566	18502	12419	11761	15422	11699
C3_06470W	ADF1	P46589	68.8	Adherence factor (Adhesion and aggregation mediating surface antigen)	-0.180133	0.114724	-0.917172	-0.622314	0.905625	0.981527	0.314272	0.541383	188	457	240	393	161	182	187	255
C3_06480C	ECM15	A0A1D8PKH0	12.4	Ecm15p	0	8.25238	0	8.42072	1	0.336957	1	0.17941	0	0	0	0	0	0	48	86
C3_06490W	C3_06490W	A0A1D8PKI3	34.6	Acetyltransferase	-0.566061	0.195913	-0.0552243	0.70675	0.214164	0.873919	0.931118	0.0984099	9170	9405	7507	6725	10958	6580	12164	12383
C3_06500W	UBA1	A0A1D8PKJ3	114.2	E1 ubiquitin-activating protein	-0.250525	-0.0259147	0.473556	0.698167	0.0729119	0.972562	0.000128443	8.65412e-09	50825	49173	51959	43584	67213	72706	76940	86730
C3_06540C	C3_06540C	A0A1D8PKK7	30.2	Uncharacterized protein	0.489041	0.268511	-0.433423	-0.653953	0.1762	0.700312	0.228867	0.0514896	526	581	891	867	326	513	590	593
C3_06580W	JEN1	A0A1D8PKH9	61.2	Jen1p	-1.51758	-2.58135	0.422686	-0.641081	0.00925568	7.09846e-06	0.557981	0.356904	1059	893	479	302	1110	1561	349	173
C3_06590W	LYS9	A0A1D8PKJ4	49.2	Saccharopine dehydrogenase (NADP+, L-glutamate-forming)	0.207861	-0.111874	0.673865	0.354131	0.393772	0.834822	0.000325511	0.0924339	12295	12303	16872	15347	15624	24597	20539	23031
C3_06610W	C3_06610W	A0A1D8PKJ5	40.9	Uncharacterized protein	0.754129	0.0913934	-0.100596	-0.763332	0.00105089	0.924083	0.762945	0.000982882	816	892	1772	1499	768	837	928	1108
C3_06620W	FUN31	A0A1D8PKQ6	149.1	Serine/threonine protein kinase	1.88866	0.423026	2.27462	0.808983	0.499283	0.973629	0.364346	0.80294	0	397	1125	546	1027	861	2046	985
C3_06650C	TAF60	A0A1D8PKJ2	58.2	Taf60p	0.645647	0.0770603	0.119481	-0.449106	0.157923	0.973629	0.837163	0.351441	351	543	872	714	479	495	606	619
C3_06700C	RMD9	Q5A2V2	70.2	Protein RMD9, mitochondrial	-0.304437	-0.54895	0.285617	0.0411041	0.785089	0.724754	0.770853	0.982135	557	267	523	249	476	543	403	424
C3_06710W	C3_06710W	A0A1D8PKK4	74.6	Uncharacterized protein	0.551646	-0.0905742	1.05869	0.416474	0.479655	0.981527	0.102445	0.601896	230	149	366	269	456	327	483	407
C3_06720W	PRP5	Q5ADL0	100.3	Pre-mRNA-processing ATP-dependent RNA helicase PRP5 (EC 3.6.4.13)	-8.82479	-0.190181	0.474722	9.10933	6.96008e-07	0.971392	0.696777	4.52895e-07	84	63	0	0	95	112	108	107
C3_06730W	C3_06730W	Q5ADL1	29	Uncharacterized protein	-8.10046	-0.113377	1.20408	9.19116	0.0225851	1	0.778547	0.00881962	88	0	0	0	94	114	100	128
C3_06740W	C3_06740W	Q5ADL2	76.6	Uncharacterized protein	0	-1.54593	8.93344	7.56729	1	0.950549	0.142041	0.237397	0	0	0	0	0	199	0	75
C3_06760W	C3_06760W	A0A1D8PKJ8	32	Uncharacterized protein	-0.143213	-0.161166	1.1896	1.17165	0.940965	0.975023	0.223516	0.241285	461	115	364	237	635	700	655	766
C3_06770W	SLU7	Q5ADL4	41	Pre-mRNA-splicing factor SLU7	9.35007	-8.14362	7.88204	-9.61165	0.126592	0.33445	0.194735	0.106322	0	0	88	179	0	96	0	0
C3_06800C	DCN1	Q5ADL9	34.9	Defective in cullin neddylation protein 1	-0.436228	0.332838	0.0714811	0.840548	0.447125	0.758164	0.91961	0.0835101	6976	6883	6675	4999	9174	5066	10114	11903
C3_06820C	TAF12	Q5ADM2	55.7	TFIID_20kDa domain-containing protein	-0.0133805	-0.0107947	-0.557162	-0.554576	1	1	0.191747	0.205014	43810	40695	52556	42711	35309	21050	32980	35425
C3_06830C	C3_06830C	Q5ADM3	155.7	Putative helicase	-0.473742	-0.156554	-0.451603	-0.134415	0.34271	0.927123	0.345526	0.832727	1344	1253	1103	1018	681	1281	1159	880
C3_06850W	FCR1	Q5ADM4	56.9	Fcr1p	0.302218	0.327124	0.208724	0.23363	0.830417	0.920864	0.865961	0.859671	153	258	270	300	324	134	323	390
C3_06860C	C3_06860C	Q5ADM5	32	Aldo-keto reductase superfamily protein	-0.938521	0.861272	-2.54744	-0.747643	0.00999867	0.0479352	3.6427e-15	0.0490053	58577	57026	35580	32813	11905	7546	22465	20577
C3_06870W	TDH3	Q5ADM7	35.8	Glyceraldehyde-3-phosphate dehydrogenase (EC 1.2.1.12)	0.197014	0.403712	-0.090358	0.11634	0.416966	0.103673	0.731989	0.658367	67724	67024	85435	89143	51053	78551	102388	98277
C3_06890W	PMT2	Q5ADM9	88.3	Dolichyl-phosphate-mannose--protein mannosyltransferase 2 (Protein mannosyltransferase 2) (EC 2.4.1.109)	0.448787	0.104124	-0.0214856	-0.366148	0.190586	0.93744	0.966608	0.296884	6839	7605	10502	11725	5216	9450	8587	9754
C3_06900W	ISA2	Q5ADN0	25.5	Isa2p	0.397334	0.290396	0.207114	0.100176	0.324381	0.679848	0.634198	0.847777	1910	2709	3189	3655	2670	2671	4241	3548
C3_06910C	TPD3	Q5ADN1	73.1	Protein phosphatase 2A structural subunit	-0.848933	0.359058	0.87804	2.08603	0.00143261	0.417786	0.000847742	3.14611e-17	9638	8348	5664	5645	17747	15234	22700	28257
C3_06920W	C3_06920W	Q5ADN2	37.3	Putative phosphomutase	1.2694	0.267765	-0.681913	-1.68355	1.63191e-08	0.547862	0.00478375	5.28932e-14	7499	10540	24845	24274	5461	5837	7423	8791
C3_06970W	C3_06970W	Q5ADN7	70	Signal recognition particle subunit SRP68 (SRP68)	-0.843406	0.486514	0.0530437	1.38296	0.155987	0.640329	0.949706	0.00977579	8843	7760	5834	4701	11497	5228	13360	15629
C3_07000W	RPD31	Q5ADP0	65.3	Histone deacetylase	1.65853	0.454018	0.500939	-0.703575	6.32152e-06	0.509656	0.260517	0.095022	2033	2043	6775	7734	3320	2384	4020	5474
C3_07020W	SSN6	Q5ADP3	119.9	Transcription regulator	0.144041	0.0433179	-0.774101	-0.874824	0.627693	0.972411	0.000148741	1.96202e-05	29825	39232	42812	43340	16801	24362	24439	25370
C3_07040C	YSA1	Q5ADP5	26.1	ADP-ribose diphosphatase	0.0973876	2.22038	-1.63918	0.483812	0.998819	0.585609	0.54634	0.893349	165	112	167	169	82	0	313	183
C3_07050W	SUS1	Q5ADP6	13.8	Transcription and mRNA export factor SUS1	-0.624957	-0.932416	-0.743955	-1.05141	0.202262	0.0852634	0.103275	0.0163167	5508	3222	2951	3450	2066	3298	1556	1732
C3_07060W	FESUR1	Q5ADP7	25.1	Fesur1p	-0.0145222	0.636955	-0.139794	0.511683	0.999855	0.210867	0.786564	0.212452	3873	3678	4020	4420	2329	4779	6270	6514
C3_07150C	RPS12	Q5ADQ6	15.7	40S ribosomal protein S12	0.293371	0.144192	-0.506267	-0.655446	0.540805	0.919452	0.214188	0.0960631	14075	17191	22232	21118	7159	15699	15470	13625
C3_07170C	C3_07170C	Q5ADQ8	75.8	Rab proteins geranylgeranyltransferase component A	-0.410642	-0.745358	0.987182	0.652466	0.353434	0.112541	0.00583592	0.0946465	1712	1280	1304	1250	3254	2656	2157	2091
C3_07180C	BMT1	Q5ADQ9	79.6	Beta-mannosyltransferase 1 (EC 2.4.1.-) (WRY family protein 4)	-0.0186048	-0.85368	-1.0088	-1.84388	1	0.573666	0.276183	0.0293865	283	259	348	262	184	77	82	97
C3_07210W	MET8	Q5ADR1	33.1	Bifunctional precorrin-2 dehydrogenase/sirohydrochlorin ferrochelatase	-0.400117	-0.446139	-0.0293725	-0.0753942	0.67525	0.789	0.981611	0.955212	260	247	315	129	224	280	227	210
C3_07220C	PRO2	Q5ADR2	49.1	Glutamate-5-semialdehyde dehydrogenase	0.887096	0.51171	1.12921	0.753827	0.0277462	0.422479	0.0032304	0.0701925	15117	15011	33457	29772	40682	23922	52681	60072
C3_07230W	C3_07230W	Q5ADR3	149.2	Phospholipid-transporting ATPase (EC 7.6.2.1)	1.24806	-1.37458	1.1161	-1.50654	0.0426026	0.0536922	0.0699665	0.0116177	6046	2808	12043	11871	5505	14703	4515	4398
C3_07250W	GCD2	Q5ADR6	55.8	Translation initiation factor eIF2B subunit delta	-0.991873	-0.160529	0.227068	1.05841	2.29929e-05	0.797754	0.438026	7.01136e-06	998	906	587	501	951	1321	1149	1244
C3_07260C	ECM29	A0A1D8PKU7	208.7	Ecm29p	0.0317249	-0.864515	0.295764	-0.600476	0.994787	0.284233	0.683548	0.358635	5608	4433	5762	5863	3138	9877	3791	4345
C3_07300W	NOP13	Q5ADS5	44.6	Nop13p	-1.22077	-0.801918	0.368476	0.787333	0.827124	0.967436	0.945399	0.885156	174	190	186	0	287	174	318	0
C3_07310C	SLK19	Q5ADT0	133.9	Slk19p	0.199788	0.191469	0.269086	0.260767	0.224408	0.405362	0.0733332	0.089173	153748	169698	217140	203563	191747	200022	248208	285576
C3_07330W	C3_07330W	Q5ADT3	32.6	Aldo_ket_red domain-containing protein	0.957652	0.586523	0.290902	-0.0802263	0.0816945	0.511735	0.666173	0.930397	3744	3305	7523	7956	5627	2773	8084	7442
C3_07340W	GCY1	Q5ADT4	33	Glycerol 2-dehydrogenase (NADP(+))	0.345586	-0.332753	0.205454	-0.472885	0.0163496	0.0516613	0.186659	0.000624403	16701	15383	24823	21493	16452	21136	16340	18931
C3_07350W	C3_07350W	Q5ADT5	32.7	Protein YIP	1.29843	0.485038	0.430266	-0.383127	5.79878e-05	0.364213	0.267321	0.343158	859	852	2438	2329	1287	1002	1948	1920
C3_07370W	C3_07370W	Q5ADT7	21.7	Uncharacterized protein	-10.4728	-8.42908	-2.12551	0	0.0453068	0.238407	0.74275	1	175	288	0	0	0	117	0	0
C3_07380W	C3_07380W	A0A1D8PKR8	21.8	RING-type domain-containing protein	0.798716	0.0797783	0.417784	-0.301154	0.117152	0.978558	0.449588	0.626319	3681	5485	9295	8727	7564	4404	7269	8219
C3_07390C	RSM10	Q5ADT9	27.4	37S ribosomal protein S10, mitochondrial (Mitochondrial ribosomal small subunit protein 10)	-0.81119	-0.309732	0.213341	0.7148	0.00616045	0.569482	0.566944	0.0185362	1969	1902	1539	985	2062	2483	1991	2356
C3_07410C	KRS1	Q5ADU2	67.7	Lysine--tRNA ligase (EC 6.1.1.6) (Lysyl-tRNA synthetase)	1.04237	0.154835	0.868362	-0.0191687	0.00949888	0.922633	0.0329889	0.98578	73814	69731	183522	152647	163122	93585	161277	189010
C3_07420W	C3_07420W	Q5ADU3	37.4	Eukaryotic translation initiation factor 3 subunit H (eIF3h)	0.153719	-0.0694118	0.435784	0.212653	0.700328	0.964155	0.141979	0.546047	4790	6574	8152	6219	7682	7721	7949	9602
C3_07430W	C3_07430W	A0A1D8PKR9	36.4	Acid phosphatase	-4.00176	-0.0103878	-3.12665	0.864727	2.98373e-11	1	3.2651e-07	0.260489	2475	2507	199	155	144	457	269	412
C3_07440W	TPI1	Q9P940	26.6	Triosephosphate isomerase (TIM) (EC 5.3.1.1) (Triose-phosphate isomerase)	0.00192945	-0.0184518	0.355183	0.334802	1	0.995538	0.136896	0.172677	48771	44181	54957	50632	63378	55304	67498	73403
C3_07460W	C3_07460W	Q5ADU9	87	Protein serine/threonine phosphatase	-0.611056	0.565476	-1.4922	-0.315665	0.416966	0.627707	0.0126641	0.703772	12373	11399	9807	7907	5912	2235	6951	8065
C3_07480W	C3_07480W	Q5ADV1	49.2	E3 ubiquitin-protein ligase	0.000986861	0.490259	-1.05872	-0.569449	1	0.467092	0.00775698	0.206673	712	920	978	872	426	353	597	722
C3_07490W	C3_07490W	Q5ADV2	69.3	Phosphoribomutase	0.178904	0.921288	-0.266855	0.47553	0.664479	0.00345864	0.441899	0.132705	1609	1526	2034	1985	1404	1194	2933	2985
C3_07500W	VAN1	A0A1D8PKT1	55.8	Van1p	-1.82811	-3.03726	1.57358	0.364433	0.695989	0.627707	0.714982	0.955212	82	91	58	0	413	72	74	0
C3_07550C	GEP3	Q5ADV5	72.4	Genetic interactor of prohibitins 3, mitochondrial (Found in mitochondrial proteome protein 38)	0.549364	-0.329892	0.615744	-0.263511	0.224408	0.693384	0.150659	0.611365	311	259	560	393	429	451	415	419
C3_07560W	TCC1	A0A1D8PKT0	81.8	Tcc1p	-1.01366	-0.224733	1.32542	2.11434	0.325386	0.961658	0.155144	0.0157201	421	352	94	328	658	1353	1011	978
C3_07580W	C3_07580W	A0A1D8PKU3	9.6	Uncharacterized protein	-3.63959	-0.866272	-3.34338	-0.570068	1.23074e-90	3.8339e-05	1.87022e-76	0.00693653	130449	150144	12273	13132	14263	13382	9038	9126
C3_07590W	C3_07590W	Q5ADW0	12.5	Uncharacterized protein	-0.167065	-0.5058	-0.266592	-0.605327	0.485891	0.0174618	0.193787	0.000920955	77863	105197	95511	88925	67981	86161	63367	64880
C3_07600W	C3_07600W	Q5ADW1	25.3	Uncharacterized protein	-0.242482	-0.220141	-0.325507	-0.303166	0.371367	0.596537	0.180385	0.228137	6317	7521	7194	6081	4980	6206	4896	6480
C3_07610W	TIP120	Q5ADW3	134.4	Cullin-associated NEDD8-dissociated protein 1 (CaTIP120) (Cullin-associated and neddylation-dissociated protein 1) (TBP-interacting protein 120 homolog)	-0.331463	0.00948684	0.951664	1.29261	0.377644	1	0.00122971	7.34968e-06	1067	806	960	738	1743	1916	2088	2294
C3_07640C	FUM12	A0A1D8PKV4	55.2	Fum12p	-0.266111	0.432004	-0.358558	0.339557	0.167689	0.0310615	0.0406535	0.059789	60926	51273	56900	49165	42796	45385	67725	74054
C3_07700W	C3_07700W	Q5ADX4	29.5	Putative serine hydrolase	0.931623	0.247839	-1.60351	-2.28729	0.0114889	0.787761	2.44053e-06	1.04471e-11	8746	13116	22830	24158	2859	4495	5999	4187
C3_07730W	WOR4	Q5ADX8	45.3	Wor4p	0.82992	0.749039	-0.466134	-0.547014	2.7359e-05	0.000766466	0.0319405	0.00983452	926	930	1944	1796	646	709	1414	1291
C3_07740W	C3_07740W	Q5ADY0	75.2	TMF_TATA_bd domain-containing protein	1.01607	0.454597	-0.0240622	-0.585536	0.00364318	0.432292	0.968874	0.1279	18914	24290	42361	55658	15300	28505	32007	37770
C3_07750W	UTP9	Q5ADY1	49.6	Utp9p	-0.950966	0.0329549	-0.121492	0.862429	0.00391025	0.990588	0.796553	0.0105224	820	1053	498	592	777	966	1064	1044
C3_07770C	C3_07770C	A0A1D8PKW0	33.9	CAP-Gly domain-containing protein (Fragment)	-1.74801	0.651279	-2.10239	0.296896	1.76252e-64	1.34778e-08	9.27682e-93	0.01456	47008	49497	17906	14747	9823	13023	20527	21789
C3_07780C	NUP159	A0A1D8PKV6	92.8	FG-nucleoporin	-0.140341	-0.265911	0.0928776	-0.0326928	0.725288	0.597267	0.806215	0.951533	2377	2910	2771	2655	2227	3547	2879	2733
C3_07790W	STD1	A0A1D8PKV5	37.5	Std1p	-9.88514	-6.77985	-3.18709	0	0.0820792	0.433445	0.620479	1	158	149	0	0	31	0	0	0
C3_07800C	C3_07800C	A0A1D8PL04	24.5	Fcf2 domain-containing protein	-0.0262951	0.00321527	0.272183	0.301693	0.998437	1	0.714982	0.695413	667	519	768	562	845	570	685	1044
C3_07810C	SEC61	Q9P8E3	52.5	Protein transport protein SEC61 subunit alpha	1.19721	1.13297	0.79018	0.72594	0.196076	0.371641	0.410324	0.471563	151	577	954	922	456	833	1383	1910
C3_07820W	C3_07820W	A0A1D8PKW1	12.6	Uncharacterized protein	1.14449	-0.612565	-0.0584942	-1.81555	0.0118018	0.39449	0.935932	2.49312e-05	911	706	2538	1562	608	988	524	698
C3_07830W	FBP1	A0A1D8PKW2	35.9	Fructose 1,6-bisphosphate 1-phosphatase	-0.421568	0.0222182	0.186199	0.629985	0.00099661	0.978763	0.19979	3.52759e-07	8061	8192	6811	6912	8754	9915	11354	11152
C3_07890W	TIM8	Q59MI8	9.9	Mitochondrial import inner membrane translocase subunit TIM8	0.731728	-0.714294	-0.0581284	-1.50415	0.0267542	0.0740274	0.908239	6.35835e-07	18620	13541	29752	30744	16088	14872	12817	9752
C3_07910W	C3_07910W	A0A1D8PL09	33.2	Uncharacterized protein	-10.7348	0	-10.5664	0	0.0749713	1	0.073211	1	332	220	0	0	0	0	0	0
C3_07920W	C3_07920W	A0A1D8PKZ6	71	PfkB domain-containing protein	0.0349497	-0.459216	-0.167788	-0.661954	0.98279	0.555188	0.781087	0.160847	1201	1565	1248	1919	1203	1271	1052	1092
C3_07940W	C3_07940W	A0A1D8PKW5	26.4	Chalcone_isomerase domain-containing protein	-0.615229	-0.543931	-0.494167	-0.422869	0.416966	0.657633	0.503293	0.594211	1924	1365	1347	1100	663	1790	1128	791
C3_07950C	MPG1	O93827	40	Mannose-1-phosphate guanyltransferase (EC 2.7.7.13) (ATP-mannose-1-phosphate guanylyltransferase) (CASRB1) (GDP-mannose pyrophosphorylase)	-0.46938	-0.00796471	0.0226795	0.484094	0.000395948	1	0.915801	0.000290305	43045	38270	35157	31524	36101	47979	49547	48995
C4_00020W	VMA6	A0A1D8PKX3	40.2	V-type proton ATPase subunit	0.305482	-0.19487	1.11602	0.61567	0.246523	0.679848	8.29115e-08	0.00690748	1819	1704	2591	2349	3119	4694	4175	3820
C4_00040W	CNH1	A0A1D8PKY1	88.8	Cnh1p	-10.0953	0.301593	-0.553532	9.84339	3.765e-09	0.929799	0.591946	1.80809e-08	149	207	0	0	132	109	167	191
C4_00060W	C4_00060W	A0A1D8PL00	23.6	Gamma-glutamylcyclotransferase (EC 4.3.2.-)	-4.44788	-0.216879	3.82008	8.05108	0.507222	1	0.524387	0.154477	7	0	0	0	92	0	28	76
C4_00070C	C4_00070C	A0A1D8PKX5	90.2	Putative zinc metalloprotease	-0.771581	0.736475	-0.330936	1.17712	0.164739	0.320552	0.597137	0.0191732	441	605	283	403	403	433	912	743
C4_00140C	HIS4	A0A1D8PKY7	91.8	Histidine biosynthesis trifunctional protein [Includes: Phosphoribosyl-AMP cyclohydrolase (EC 3.5.4.19); Phosphoribosyl-ATP pyrophosphohydrolase (EC 3.6.1.31); Histidinol dehydrogenase (HDH) (EC 1.1.1.23)]	0.0895086	0.336954	-0.191988	0.0554575	0.791815	0.276826	0.444646	0.868545	3937	3851	5144	4276	2831	4133	5457	4858
C4_00150C	PEX5	O74711	67.3	Peroxisomal targeting signal receptor (PTS1 receptor) (PTS1R) (Peroxin-5)	-2.45429	-0.402887	-1.47135	0.580053	5.01678e-22	0.371641	2.2881e-08	0.0563104	8318	12319	2412	1865	3226	4328	3176	3561
C4_00160C	CAR2	A0A1D8PL14	47.3	Ornithine aminotransferase (EC 2.6.1.13)	-0.854383	-0.920014	0.493344	0.427713	2.17057e-09	6.22059e-10	0.00112389	0.00674867	69164	65958	46416	38561	91388	100447	64269	56150
C4_00170W	C4_00170W	Q59US8	15.7	Uncharacterized protein	-0.0459053	0.0236263	-0.59414	-0.524608	0.981528	1	0.339956	0.426392	5153	5053	4697	6403	4227	2391	3180	5089
C4_00200C	MET15	Q59US5	48	Bifunctional cysteine synthase/O-acetylhomoserine aminocarboxypropyltransferase	-0.511899	-0.216392	-0.6041	-0.308593	0.000563198	0.370022	2.9516e-05	0.0571073	95062	97635	72358	80112	59351	68753	66294	64456
C4_00220C	SUB2	A0A1D8PKZ3	49.1	ATP-dependent RNA helicase	-0.421999	-0.018259	-0.0512808	0.352459	0.096082	0.996933	0.884517	0.175015	44605	42019	39570	33894	45190	38105	49953	49025
C4_00230W	C4_00230W	A0A1D8PKZ4	23.5	Uncharacterized protein	0.401842	0.216993	-0.792518	-0.977366	0.171304	0.700312	0.00174359	9.42002e-05	12564	14632	19953	20624	8475	7149	11128	10721
C4_00240C	PRO3	A0A1D8PKZ7	29	Pyrroline-5-carboxylate reductase (EC 1.5.1.2)	-0.600645	-0.740118	0.26937	0.129896	0.0808873	0.0572217	0.486781	0.785425	4868	7785	5277	4190	7427	7878	5754	5149
C4_00270W	ATP2	A0A1D8PKZ9	53.9	ATP synthase subunit beta (EC 7.1.2.2)	0.256221	0.303242	0.0743896	0.121411	0.286731	0.330186	0.797836	0.663129	145635	135933	194521	186517	116643	187665	224864	213680
C4_00280W	STE24	A0A1D8PL01	50.6	CAAX prenyl protease (EC 3.4.24.84)	1.79131	-0.214432	0.792714	-1.21302	3.72931e-09	0.800155	0.0180442	0.000158509	3216	2279	10043	11451	5004	4529	4948	4908
C4_00300C	SWI1	Q59UR3	111.1	Swi1p	-2.92839	-0.320172	-0.63271	1.97551	5.66556e-05	0.910843	0.493215	0.0114617	715	349	114	48	331	364	293	370
C4_00310C	MNN10	Q59UR2	40	Alpha-1,6-mannosyltransferase	0.0349085	-0.419034	0.521204	0.0672616	0.982231	0.593847	0.275172	0.928794	693	491	758	624	773	953	626	905
C4_00330C	C4_00330C	A0A1D8PL02	10.4	F1F0 ATP synthase subunit e	0.729726	-0.204178	0.359873	-0.57403	0.0760024	0.852857	0.429153	0.17941	5385	4696	10583	8455	4191	9277	6853	6617
C4_00340W	PTC7	A0A1D8PL06	38	Protein phosphatase (EC 3.1.3.16)	0.131553	0.188862	-0.498867	-0.441557	0.43978	0.371641	9.57772e-05	0.000818185	10375	9727	13744	11303	6312	8142	9686	9761
C4_00380W	C4_00380W	A0A1D8PL15	36.8	D-arabinose 1-dehydrogenase (NAD(P)(+))	-1.12236	-0.331886	0.700815	1.49129	0.740483	0.981527	0.825387	0.614354	185	86	149	0	194	256	195	227
C4_00390W	C4_00390W	Q59UQ4	16.6	Chromatin-binding transcription coactivator	0.966229	0.787331	-0.0552649	-0.234163	0.00287607	0.0463025	0.915042	0.582283	435	596	1205	1076	469	531	924	1128
C4_00410W	C4_00410W	Q59UQ1	21.4	Uncharacterized protein	1.3477	-0.179958	1.51073	-0.0169325	0.245326	0.976138	0.166372	1	149	138	624	223	156	717	395	472
C4_00420C	C4_00420C	A0A1D8PL12	90.1	MHD domain-containing protein	-1.24207	-0.247229	-1.18741	-0.192568	5.9895e-12	0.458548	5.58e-11	0.433992	52228	63541	26019	29126	21849	29854	25246	26041
C4_00470C	C4_00470C	Q59UP4	69.7	RING-type domain-containing protein	-0.608356	-8.83448	-1.92622	-10.1523	0.657149	4.77152e-06	0.05822	2.33927e-08	204	330	165	227	84	54	0	0
C4_00490W	C4_00490W	A0A1D8PL26	59.1	Diphthamide biosynthesis protein 2-2	-0.216707	-0.267846	-0.321456	-0.372595	0.814701	0.876843	0.658641	0.611365	5711	6665	5803	6213	2449	7996	5178	4665
C4_00510C	RLP24	Q59SI1	24.9	ATPase-activating ribosome biosynthesis protein	-0.0899221	-0.709983	0.256113	-0.363948	0.89573	0.13121	0.568583	0.401954	1212	1215	1617	994	1474	1432	1096	1027
C4_00520W	PAM18	Q59SI2	17.3	Mitochondrial import inner membrane translocase subunit TIM14 (Presequence translocated-associated motor subunit PAM18)	-0.114068	0.154594	0.534257	0.802919	0.764323	0.805549	0.0319405	0.000786247	9613	8968	11105	8461	12737	14445	14963	21053
C4_00540C	NMD5	Q59SI4	116.1	Nmd5p	-1.72737	-1.5804	2.89548	3.04245	0.0435602	0.144554	0.000175114	0.000108793	192	647	167	120	3333	2845	1658	814
C4_00570C	PCT1	Q59SI6	53	Choline-phosphate cytidylyltransferase	0.443828	-0.291502	-0.470147	-1.20548	0.302105	0.71827	0.250136	0.000679279	1591	2633	3295	3190	1434	1636	1589	1385
C4_00590C	C4_00590C	A0A1D8PL36	76.1	ENTH domain-containing protein	-0.718083	-0.80758	-0.854085	-0.943583	0.528172	0.636916	0.403664	0.364162	1826	1306	854	1283	1172	510	858	323
C4_00600C	MUC1	A0A1D8PL32	96.6	Muc1p	-1.72182	0.452795	-0.0248677	2.14974	0.063399	0.85757	0.98973	0.0155675	880	1051	576	109	780	1158	1699	1407
C4_00620C	SPC2	Q59SJ1	19	Signal peptidase complex subunit	2.4944	-1.83816	1.39443	-2.93812	0.00172385	0.0681774	0.109224	0.000196149	103	359	1623	1317	411	839	180	225
C4_00630C	SEC72	Q59SJ2	23.4	Sec63 complex subunit	1.19615	-0.380076	2.05	0.473775	1.98175e-21	0.0165693	1.60266e-62	0.000504757	1368	1492	3838	3585	5378	6619	5633	5265
C4_00650W	HIS5	A0A1D8PL37	43.1	Histidinol-phosphate transaminase	0.253233	-0.409484	0.562664	-0.100053	0.796965	0.787761	0.436181	0.926125	1003	997	1234	1452	776	2333	1147	1525
C4_00660W	C4_00660W	Q59SJ6	28.9	Mitochondrial 37S ribosomal protein MRPS17	-0.399144	0.66078	-1.63569	-0.575763	0.444626	0.280219	2.80087e-05	0.219618	1680	1670	1613	1278	397	714	1190	848
C4_00700C	C4_00700C	Q59SK0	36.1	4-nitrophenylphosphatase (PNPPase) (EC 3.1.3.41)	-0.397515	-0.129199	0.859853	1.12817	0.214266	0.884948	0.00135703	1.96728e-05	586	482	498	424	880	1087	1062	1065
C4_00710W	C4_00710W	A0A1D8PL57	75.2	ATPase_2 domain-containing protein	-0.066132	0.946907	0.493976	1.50701	1	0.911572	0.884721	0.617795	0	268	165	123	182	193	428	433
C4_00760W	ZCF21	A0A1D8PL89	65.4	Zcf21p	-0.389325	-0.159315	-0.390487	-0.160477	0.303093	0.870315	0.281801	0.720667	505	571	488	443	374	457	388	494
C4_00770C	C4_00770C	Q59SK8	27.2	SUI1 domain-containing protein	-0.0814137	-0.0585732	0.229272	0.252113	0.832735	0.964155	0.395244	0.357271	4802	5620	6695	4546	5598	6761	6910	7142
C4_00780C	C4_00780C	A0A1D8PL54	123.4	Uncharacterized protein	-1.20007	-2.09012	1.05716	0.167118	0.0230201	5.57058e-05	0.0452658	0.833437	855	696	310	448	1662	1574	352	561
C4_00830W	SPS20	Q59SL5	30.9	Sps20p	-0.994023	0.252594	-0.33667	0.909946	0.507738	0.968247	0.838097	0.54061	159	142	95	77	187	39	191	149
C4_00840W	C4_00840W	A0A1D8PL49	67.4	Uncharacterized protein	0.986202	-0.0739308	0.863897	-0.196235	1.55037e-08	0.921082	9.8002e-07	0.393407	3449	3123	7531	7223	6013	6001	6597	7040
C4_00880W	C4_00880W	A0A1D8PL79	60.9	tRNA adenylyltransferase	0.581791	-0.715891	1.25196	-0.0457238	0.0924748	0.0639096	2.75755e-05	0.936007	329	305	568	509	722	802	602	499
C4_00890W	ARO1	Q5AME2	169.3	Pentafunctional AROM polypeptide [Includes: 3-dehydroquinate synthase (DHQS) (EC 4.2.3.4); 3-phosphoshikimate 1-carboxyvinyltransferase (EC 2.5.1.19) (5-enolpyruvylshikimate-3-phosphate synthase) (EPSP synthase) (EPSPS); Shikimate kinase (SK) (EC 2.7.1.71); 3-dehydroquinate dehydratase (3-dehydroquinase) (EC 4.2.1.10); Shikimate dehydrogenase (EC 1.1.1.25)]	0.848666	-0.222541	0.633517	-0.437689	1.07812e-06	0.492059	0.000429129	0.0232873	17664	15543	34755	33043	21282	31409	25033	27983
C4_00940W	C4_00940W	A0A1D8PL76	35.6	Elongator subunit	8.18609	0.549486	8.9227	1.2861	1.45395e-05	0.865364	1.7663e-06	0.314178	0	0	69	53	111	64	163	150
C4_00970C	MDN1	A0A1D8PL61	572.1	Midasin	1.33167	0.839876	0.945483	0.453693	0.122434	0.554466	0.287685	0.671832	742	225	1381	1391	1110	738	2210	1807
C4_01060W	MLP1	A0A1D8PL86	207.6	Mlp1p	-0.557746	-0.133354	-0.65776	-0.233369	0.0101272	0.812149	0.0016794	0.36503	51144	62494	43219	43972	37011	35017	40659	37920
C4_01070W	HGT17	A0A1D8PL74	67.3	Hgt17p	-1.35154	-1.11571	0.492765	0.728599	0.162921	0.423526	0.661709	0.501008	253	1061	258	317	770	1102	498	517
C4_01080W	RAT1	Q5AMG5	111.6	5'-3' exoribonuclease 2 (EC 3.1.13.-)	0.641006	-0.498909	0.349975	-0.78994	0.19642	0.512689	0.511874	0.0901303	764	1212	1789	1692	1201	1332	1265	859
C4_01140C	C4_01140C	Q5AMH0	21.1	Uncharacterized protein	0.0308656	0.489032	0.456879	0.915045	1	0.820444	0.671001	0.343851	6305	7947	7674	8721	15261	3232	14200	18733
C4_01150W	ASK1	Q5AMH1	67.2	Ask1p	0	-11.3211	11.0595	0	1	0.0848566	0.0381569	1	0	0	0	0	577	174	0	0
C4_01160W	CRD2	A0A1D8PL78	7.7	Crd2p	-0.622009	-0.570514	0.716846	0.768342	0.124437	0.294359	0.0594633	0.0446689	26489	33970	20477	23731	32905	70131	38375	41761
C4_01190W	CAS5	Q5AMH6	92.7	Cell wall integrity transcriptional regulator CAS5 (Caspofungin sensitivity protein 5)	-1.62899	0	-9.70423	-8.32546	0.850269	1	0.0853343	0.159652	132	173	0	106	0	0	0	0
C4_01200C	AAT22	A0A1D8PL85	46.8	Aspartate aminotransferase (EC 2.6.1.1)	-0.963799	-0.0843637	-0.647752	0.231683	0.000683452	0.950657	0.0299965	0.539745	31566	36391	20694	18785	24594	18327	24580	24415
C4_01230C	C4_01230C	Q5AMI0	14.8	Uncharacterized protein	0	1.83517	5.73354	7.7485	1	0.938272	0.38495	0.224797	0	0	0	0	18	0	33	51
C4_01270W	RPS6A	A0A1D8PL99	27.1	40S ribosomal protein S6	-0.216354	0.0949363	-0.402995	-0.0917051	0.317769	0.85631	0.0285202	0.717864	221752	223433	222353	211687	174342	162517	220715	210157
C4_01280C	C4_01280C	A0A1D8PL91	48.9	Uncharacterized protein	1.32789	0.0675599	2.39978	1.13944	0.659095	1	0.327594	0.69938	173	0	273	227	539	374	570	592
C4_01290W	C4_01290W	A0A1D8PLA6	92.2	Uncharacterized protein	10.0243	-0.0839722	9.72306	-0.38526	1.78675e-09	0.984482	5.63842e-09	0.685522	0	0	212	221	157	155	163	189
C4_01370W	ILV6	A0A1D8PLB7	33.1	Acetolactate synthase regulatory subunit	0	-5.56018	5.29859	0	1	0.602062	0.429143	1	0	0	0	0	0	16	0	0
C4_01410W	BEM1	A0A1D8PLB6	72.2	Phosphatidylinositol-3-phosphate-binding protein	1.43568	0.231647	1.63201	0.42798	0.888194	1	0.832002	0.974285	0	104	0	299	0	352	441	0
C4_01420W	C4_01420W	A0A1D8PLA2	267.5	Uncharacterized protein	0.456612	0.668038	-0.0341573	0.177269	0.369738	0.273221	0.959448	0.771666	16244	18234	27775	25814	20698	12299	26996	37249
C4_01430C	C4_01430C	Q5AMK4	48.5	Uncharacterized protein	-1.5942	0.0519391	-1.93128	-0.285135	1.16828e-05	0.981527	6.53959e-08	0.573411	2294	2270	830	878	680	506	750	737
C4_01450W	PWP1	A0A1D8PLA3	67.9	rRNA-processing protein	-0.3113	0.375007	-0.38486	0.301447	0.254429	0.276826	0.128144	0.264433	114497	93146	102173	88116	84054	74946	122375	125217
C4_01460C	C4_01460C	A0A1D8PLE6	25.2	Uncharacterized protein	-1.94835	1.42968	-2.963	0.415037	0.0282024	0.255601	0.000336109	0.734138	1105	1346	342	374	234	66	468	547
C4_01490W	NIP1	Q5AML1	99.8	Eukaryotic translation initiation factor 3 subunit C (eIF3c) (Eukaryotic translation initiation factor 3 93 kDa subunit homolog) (eIF3 p93) (Translation initiation factor eIF3, p93 subunit homolog)	-0.137408	-0.170311	0.587093	0.55419	0.548671	0.609881	0.000468704	0.00129595	17421	16236	19339	15490	21044	30617	26583	27313
C4_01500W	NCS6	Q5AML2	44.4	Cytoplasmic tRNA 2-thiolation protein 1 (EC 2.7.7.-) (Cytoplasmic tRNA adenylyltransferase 1)	0.239798	-1.05487	0.335417	-0.959253	0.904484	0.590877	0.823232	0.461952	85	200	244	140	250	95	117	89
C4_01510W	C4_01510W	Q5AML3	29.1	Oxidoreductase	0.232554	-0.569866	1.5026	0.70018	0.486271	0.0740859	1.43489e-10	0.0071213	713	937	1108	1083	2203	2511	1766	2007
C4_01520C	RPL20B	A0A1D8PLC9	20.3	60S ribosomal protein L20	-0.614053	-0.117068	-0.157466	0.339519	1.14285e-05	0.726741	0.364041	0.0276725	93206	82621	69231	61243	77607	81087	84762	89700
C4_01530C	ERG251	A0A1D8PLB5	37.8	Erg251p	0.850692	0.139791	1.32676	0.615862	0.167233	0.962959	0.0152593	0.340837	618	596	1286	1196	1818	1181	1430	2611
C4_01550C	CPA1	Q5AML6	46.9	Carbamoyl-phosphate synthase arginine-specific small chain (CPS-A) (EC 6.3.5.5) (Arginine-specific carbamoyl-phosphate synthetase, glutamine chain)	1.18547	0.506819	-0.780883	-1.45953	9.91772e-06	0.208228	0.00592696	4.70976e-08	3202	2751	8511	6903	1460	2078	3347	2548
C4_01650C	C4_01650C	A0A1D8PLB3	56.2	Cleavage polyadenylation factor subunit	1.06668	-1.80736	0.801524	-2.07252	0.065918	0.00195033	0.180085	7.69962e-05	732	543	1793	1261	688	1634	367	396
C4_01660W	C4_01660W	A0A1D8PLF7	128	Uncharacterized protein	0.262268	-0.195588	0.299405	-0.158451	0.603533	0.854646	0.509127	0.770742	701	662	1145	726	710	1001	795	964
C4_01670C	C4_01670C	A0A1D8PLD8	45.8	Uncharacterized protein	-0.202672	-0.228902	0.460603	0.434373	0.799824	0.884948	0.427814	0.475081	164	124	157	128	182	220	205	201
C4_01680W	TOA2	Q5AMM1	14.6	Transcription initiation factor IIA subunit 2	0.010061	0.434488	-0.549282	-0.124855	1	0.550603	0.217306	0.84101	8780	10609	11214	10866	8067	4927	10517	10928
C4_01690C	HRT2	A0A1D8PLC6	52.7	Putative methyltransferase	-3.50586	-0.0626356	-2.16414	1.27908	3.07523e-31	0.976138	2.57657e-12	0.000117138	8823	12114	1114	974	1830	2953	3059	2280
C4_01700C	NHP6	Q9UVL1	10.5	Non-histone chromosomal protein 6	0.649591	-1.43588	1.19474	-0.890732	0.249894	0.00796381	0.0139952	0.0862115	25182	32718	48848	53502	77572	52964	19157	39788
C4_01720C	C4_01720C	Q5AMM4	80.9	RNA polymerase II degradation factor 1	0.361068	-0.0823006	-0.0109211	-0.45429	0.408725	0.967436	0.989006	0.25695	4939	5263	6772	7985	3529	6946	5657	5805
C4_01730C	C4_01730C	A0A1D8PLC3	80.4	Putative tubulin tyrosine ligase	0.197112	0.0738618	-0.287664	-0.410914	0.710938	0.971814	0.518575	0.340041	4002	4007	5292	5105	2186	4625	4150	4128
C4_01740W	TIM12	Q5AMM6	12.4	Tim12p	-0.638985	-0.438014	-0.653002	-0.452031	0.242869	0.637814	0.212959	0.437315	3651	2520	2018	2454	2216	1684	1991	1482
C4_01750C	FBA1	Q9URB4	39.2	Fructose-bisphosphate aldolase (FBP aldolase) (FBPA) (EC 4.1.2.13) (37 kDa major allergen) (Fructose-1,6-bisphosphate aldolase) (IgE-binding allergen)	-0.632898	-0.421361	-0.540444	-0.328907	0.000209704	0.0503551	0.00185978	0.0851223	369574	352708	245879	279540	221301	283076	230280	214137
C4_01770W	POL30	Q5AMN0	29	Proliferating cell nuclear antigen	0.619615	-0.315338	0.37131	-0.563643	0.016715	0.456521	0.184839	0.0325564	8243	7719	14768	13076	8589	12508	8224	11730
C4_01780C	C4_01780C	Q5AMN1	37.4	RXT2_N domain-containing protein	-0.824814	-0.41795	-0.493151	-0.0862865	0.28411	0.802723	0.543957	0.944831	736	688	487	426	608	388	298	615
C4_01820C	C4_01820C	Q5AMN5	35.8	Ribose phosphate diphosphokinase subunit	-0.206901	0.00859269	1.84478	2.06027	0.835853	1	0.00129269	0.000331939	132	135	90	168	435	537	558	599
C4_01830C	C4_01830C	A0A1D8PLD9	67.5	M20_dimer domain-containing protein	-1.41283	-1.53997	-1.42989	-1.55703	0.656161	0.783761	0.620635	0.599814	629	363	191	230	67	328	150	0
C4_01840C	C4_01840C	A0A1D8PLD7	26.6	DLH domain-containing protein	0.33045	-0.00242464	-0.348132	-0.681006	0.0559617	1	0.0377258	1.17836e-05	13277	15587	20248	20746	10288	12671	14059	13034
C4_01870C	ERG8	A0A1D8PLH0	48.3	Phosphomevalonate kinase (EC 2.7.4.2)	0.265538	-0.272769	-0.286496	-0.824803	0.290282	0.433445	0.228162	5.29079e-05	10945	13473	16448	16703	9535	10637	8777	11097
C4_01890C	ARL1	Q5AMP3	20.7	Arf family GTPase	9.2544	0.780188	8.84826	0.374056	1.61322e-07	0.680491	6.25985e-07	0.779313	0	0	157	100	71	102	143	207
C4_01900C	MDH1-1	Q5AMP4	34.7	Malate dehydrogenase (EC 1.1.1.37)	0.361355	0.31786	-0.780702	-0.824197	0.0537836	0.197124	2.20811e-06	7.90291e-07	235451	276986	374138	370047	150137	148847	210422	235191
C4_01950W	C4_01950W	Q5AMP9	32.9	F-actin-capping protein subunit beta	0.0943481	-0.0503375	0.425648	0.280963	0.855593	0.978763	0.202167	0.451829	1738	2137	2219	2444	2680	2524	2701	3326
C4_01960C	C4_01960C	A0A1D8PLF9	49.8	Uncharacterized protein	-0.772089	2.50743	-1.94218	1.33734	0.863964	0.607471	0.54102	0.707184	261	1133	426	487	0	398	2357	60
C4_01980C	CLC1	Q5AMQ2	26	Clathrin light chain	0.211561	-0.646947	-0.123158	-0.981666	0.0884952	3.71236e-09	0.355846	2.14096e-21	106981	119508	150473	146239	99014	110666	80088	78984
C4_01990W	C4_01990W	A0A1D8PLE7	9.6	Uncharacterized protein	8.13225	-0.571004	10.1767	1.47348	0.125409	0.982804	0.0380053	0.830749	0	0	123	0	265	152	0	349
C4_02000C	RGA2	Q5AMQ3	131.1	Rga2p	-0.715116	0.674114	-1.83096	-0.441733	0.420564	0.622911	0.00926847	0.641846	1332	4504	1948	2041	902	716	1606	1508
C4_02020W	CAT2	Q5AMQ5	71.4	Carnitine O-acetyltransferase	-1.65888	0.155132	-1.27105	0.542965	1.44146e-17	0.768797	1.37657e-10	0.0147505	50224	41746	18585	14607	19403	18846	25707	25215
C4_02060C	TFG1	Q5AMR1	69	Transcription initiation factor IIF subunit alpha	-0.212506	1.77564	-1.77156	0.216587	0.42948	1.26592e-19	1.40634e-20	0.40655	11454	13439	11061	13116	3373	3996	14509	15399
C4_02090C	C4_02090C	Q5AMR4	27.1	Exosome non-catalytic core subunit	9.6004	-0.62634	9.99992	-0.226815	1.33478e-08	0.688612	2.79081e-09	0.842318	0	0	182	143	185	194	163	129
C4_02110W	C4_02110W	Q5AMR6	20.3	Uncharacterized protein	1.83413	1.94881	0.604826	0.719501	4.02924e-41	2.01775e-45	4.36674e-05	9.44402e-07	4794	5475	22821	18773	6724	9164	36873	35315
C4_02120W	ERV29	Q5AMR7	35.1	Erv29p	-0.188404	0.327801	0.590938	1.10714	0.340279	0.123435	0.00013516	9.12616e-14	2795	2909	3032	2649	3969	4723	5852	7090
C4_02130W	CYT2	Q5AMR8	28.6	Cytochrome c heme lyase (EC 4.4.1.17)	1.43666	-0.283024	0.562073	-1.15761	0.00363552	0.835063	0.332931	0.0232873	138	149	550	339	204	223	184	234
C4_02140C	TIM10	A0A1D8PLH1	10.1	Protein transporter	0.774047	-0.517502	0.0914928	-1.20006	0.0585709	0.403333	0.872643	0.00165029	13908	15711	29322	28003	9702	23201	12751	13670
C4_02160C	C4_02160C	A0A1D8PLH5	80.8	ABC1 domain-containing protein	13.0033	0.294094	12.0246	-0.684615	1.80774e-14	0.937231	1.92399e-12	0.528489	0	0	1542	1859	1082	393	1051	1204
C4_02170C	C4_02170C	Q5AMS2	63.2	Putative hydrolase	-0.212172	-0.00922072	0.0406906	0.243642	0.749053	1	0.953545	0.684611	217	223	218	212	214	243	303	235
C4_02250C	BGL2	Q5AMT2	33.6	Glucan 1,3-beta-glucosidase BGL2 (EC 3.2.1.58) (Exo-1,3-beta-glucanase)	1.55332	-1.71096	1.7929	-1.47138	2.26681e-07	5.66216e-08	1.4675e-09	1.61255e-06	7786	8303	29030	24595	19091	38660	10977	9404
C4_02270C	BFR1	Q5AMT7	53.5	Bfr1p	0.29301	0.332443	-0.362588	-0.323155	0.297591	0.371641	0.162367	0.232129	129715	155901	197490	197917	119035	102123	160527	174595
C4_02280W	IDI1	A0A1D8PLI2	32.3	Isopentenyl-diphosphate delta-isomerase	0.27017	-0.0969735	0.1237	-0.243444	0.170638	0.840082	0.575694	0.218714	42536	42395	58709	57244	47551	45114	51796	51923
C4_02290W	LAB5	P0CH67	43.3	Lipoyl synthase, mitochondrial (EC 2.8.1.8) (Lipoate synthase) (LS) (Lip-syn) (Lipoic acid synthase)	-5.31919	-0.394474	-4.62831	0.296402	2.11611e-121	0.330019	1.17982e-92	0.350138	31489	26217	771	862	1069	1297	913	1222
C4_02300W	HOS3	A0A1D8PLH8	81.9	Histone deacetylase	-5.22719	-1.33218	-2.54748	1.34752	0.007244	0.781839	0.240796	0.599402	1193	1769	0	85	157	370	108	133
C4_02310W	BEM3	A0A1D8PLJ2	127	Bem3p	0.130172	0.635788	0.496911	1.00253	0.940846	0.714299	0.62357	0.268174	1640	927	1690	1509	2642	841	2895	3892
C4_02320C	SOD1	A0A1D8PLJ3	16.1	Superoxide dismutase [Cu-Zn] (EC 1.15.1.1)	-0.0406289	-0.45691	0.650501	0.23422	0.879685	0.00365709	1.29647e-06	0.139366	11109	9758	11758	11240	15118	18062	14517	14107
C4_02340W	C4_02340W	Q5AF37	13.6	Inhibitor I9 domain-containing protein	0.0938521	-0.364419	1.06565	0.607374	0.924678	0.751847	0.0320586	0.28394	15423	21804	33571	12353	35432	43344	35415	37005
C4_02360W	AMS1	Q5AF38	131.5	Alpha-mannosidase	0.276764	-0.285609	1.78791	1.22553	0.340279	0.484197	6.41295e-17	3.98217e-08	2192	1767	2782	2658	6839	6910	6282	7195
C4_02390W	PGA62	Q5AF41	21.2	Cell wall protein PGA62 (Flocculation protein 1) (GPI-anchored protein 62)	-0.0265174	0.0193663	0.0292826	0.0751662	0.999845	1	0.981372	0.954078	362	318	252	492	350	347	351	495
C4_02410C	AHP1	Q5AF44	19.2	Peroxiredoxin (EC 1.11.1.15)	1.44537	-0.524072	2.60395	0.634511	1.57552e-48	2.58824e-06	3.15265e-157	1.56004e-09	17179	18208	53915	55018	97799	120144	90382	88868
C4_02420C	GPI11	Q5AFT2	29.8	Glycosylphosphatidylinositol anchor biosynthesis protein 11	0.939278	0.0142734	2.63441	1.7094	0.803189	1	0.319808	0.566354	28	40	155	0	98	348	224	287
C4_02430W	CFT1	Q5AFT3	161.8	Protein CFT1 (Cleavage factor two protein 1)	-0.139252	0.210755	2.23609	2.5861	0.950418	0.967989	0.0215509	0.0078735	203	51	90	169	602	609	699	978
C4_02470C	C4_02470C	A0A1D8PLK1	27.3	Proteasome core particle subunit beta 6	1.29908	-0.217484	1.8691	0.352539	0.000745206	0.844255	3.61877e-07	0.475081	1240	1145	3851	2843	3069	5947	3703	5309
C4_02480C	TIM13	Q5AF54	12.1	Mitochondrial import inner membrane translocase subunit TIM13	0.368142	0.013571	-0.562468	-0.917038	0.194279	1	0.0258542	0.000132653	18776	22469	34389	26184	14775	13071	17320	16423
C4_02490W	ZCF15	Q5AF55	108.2	Zcf15p	0.35526	8.40194	-7.98982	0.0568568	0.855226	3.83979e-05	2.9466e-05	0.98554	37	56	75	60	0	0	73	75
C4_02500C	ADR1	Q5AF56	160.3	Transcriptional regulator ADR1	0.787768	-0.0195731	0.438451	-0.36889	0.0090675	1	0.185551	0.287665	576	472	1051	1001	600	850	826	856
C4_02520C	C4_02520C	A0A1D8PLK4	57.3	BTB_2 domain-containing protein	0.231502	-1.13688	-0.84426	-2.21264	0.839426	0.250564	0.276183	0.000949645	2079	4400	4356	4217	883	2910	1046	910
C4_02540W	RGT1	A0A1D8PLL4	115.2	Rgt1p	-0.688646	0.122875	0.313255	1.12478	0.148032	0.949214	0.55238	0.00868061	1792	1355	1264	964	2200	1685	2210	2914
C4_02550C	EMP70	Q5AF62	71.3	Transmembrane 9 superfamily member	-0.15416	-0.0469206	0.136191	0.243431	0.835066	0.989638	0.830244	0.691962	1205	962	1382	851	871	1589	1367	1401
C4_02600C	C4_02600C	A0A1D8PLL1	66.4	Uncharacterized protein	0.165073	0	-9.72901	-10.1442	0.969361	1	2.90517e-06	1.47623e-06	143	167	198	195	0	0	0	0
C4_02620C	C4_02620C	Q5AF71	81.1	Putative phosphotransferase	0.296621	1.00747	-0.165087	0.545757	0.434225	0.00169459	0.678286	0.0910678	20760	16079	30988	20804	13759	19839	43809	35371
C4_02630C	HFL2	A0A1D8PLM5	16.3	Negative cofactor 2 transcription regulator complex subunit	-1.11779	-0.532369	0.944888	1.53031	2.81738e-05	0.155558	0.000395899	5.4082e-09	783	730	448	346	1385	1556	1080	1339
C4_02710C	GRX3	Q5AF81	28.4	Monothiol glutaredoxin	0.558496	-0.224031	0.117802	-0.664726	0.100184	0.765774	0.791795	0.040813	1759	1393	2633	2627	1349	2164	1675	1843
C4_02750W	HIT1	A0A1D8PLM8	16.9	Hit1p	-9.85223	-0.115683	0.715772	10.4523	3.88278e-09	0.978763	0.383987	7.55747e-10	157	143	0	0	182	326	287	258
C4_02760C	CGR1	P56553	38.4	Cell growth-regulated gene 1 protein	0	5.75529	0	5.9236	1	0.583201	1	0.383331	0	0	0	0	0	0	0	24
C4_02770C	CDC123	Q5AFX2	40.1	Cell division cycle protein 123	0.9324	-0.805924	1.66447	-0.0738522	0.199843	0.437779	0.00828742	0.954078	415	192	724	599	692	1305	583	745
C4_02780W	C4_02780W	A0A1D8PLN3	59.3	T-complex protein 1 subunit delta	-0.494918	-0.398325	0.235571	0.332164	0.000278693	0.0131683	0.122539	0.0228495	9677	9841	7800	7865	10116	13237	10737	10153
C4_02790C	SAS10	A0A1D8PLN1	65.4	rRNA-processing protein	0.0384544	-0.837856	0.699777	-0.176533	0.988973	0.299545	0.251356	0.832371	614	868	794	918	747	1757	833	777
C4_02800W	RPC53	A0A1D8PLP0	49.7	DNA-directed RNA polymerase III subunit	-0.741865	0.451538	-1.19589	-0.002489	0.0773037	0.511252	0.00169392	1	1773	1320	1096	1005	700	654	1252	961
C4_02830C	DBP4	Q5AF95	86.7	ATP-dependent RNA helicase DBP4 (EC 3.6.4.13)	-0.351409	-0.822364	0.166752	-0.304203	0.761576	0.536989	0.881304	0.784258	1256	1176	1000	1150	548	2361	941	910
C4_02840C	MED20	A0A1D8PLN4	26.9	Mediator of RNA polymerase II transcription subunit 20 (Mediator complex subunit 20)	0.413436	0.735189	0.126278	0.448031	0.977915	0.978763	0.98973	0.963168	0	120	188	0	0	143	160	97
C4_02850W	C4_02850W	A0A1D8PLN7	89	Elongator subunit	-1.40541	-0.0182459	-0.0682233	1.31894	0.0220937	1	0.942944	0.0338926	360	268	159	112	314	286	431	277
C4_02860W	C4_02860W	A0A1D8PLN9	24.6	Uncharacterized protein	1.01549	-0.67501	0.236914	-1.45359	0.178577	0.586956	0.80112	0.0359892	675	584	1543	1349	364	1204	622	491
C4_02870C	ZUO1	Q5AF98	48.3	Zuotin	-0.107625	0.00622055	-0.0815923	0.0322533	0.534794	1	0.633196	0.87904	44549	45583	53562	41667	39438	46725	52470	50023
C4_02880C	C4_02880C	Q5AF99	29.1	Guanine nucleotide exchange factor	1.22468	0.25078	1.06897	0.0950701	0.709731	0.988123	0.725424	0.9875	67	0	75	103	71	72	103	100
C4_02890C	QCR9	A0A1D8PLP3	7.5	Ubiquinol--cytochrome-c reductase subunit 9	0.0429462	0.440159	-3.44142	-3.04421	0.995389	0.834465	1.00959e-06	2.66613e-05	6577	6196	8947	6091	871	253	734	1186
C4_02900C	CRH11	Q5AFA2	46.7	Extracellular glycosidase CRH11 (EC 3.2.-.-) (Congo red hypersensitive protein 11)	1.24268	-1.67006	1.31192	-1.60082	0.0606744	0.019862	0.0405085	0.0115683	484	231	890	1026	915	871	391	279
C4_02940W	ABP1	Q5AFA8	70.6	Abp1p	-0.0490835	-0.161953	0.155575	0.0427055	0.868763	0.608269	0.430136	0.872203	28686	24019	29652	28125	28305	30937	30866	32127
C4_02960W	C4_02960W	Q5AFB1	219.1	E3 ubiquitin-protein ligase (EC 2.3.2.27)	0.451581	1.94156	0.0496532	1.53963	0.705394	0.0462712	0.973346	0.0736438	87	93	199	85	109	75	509	346
C4_02970C	UBR1	A0A1D8PLP8	202.9	E3 ubiquitin-protein ligase (EC 2.3.2.27)	-2.55812	0.0893964	-2.39499	0.252526	3.32349e-46	0.903966	1.52391e-40	0.294294	18796	24069	4052	4164	3889	4319	5330	5043
C4_02980W	TYS1	Q5AFB3	45	Tyrosine--tRNA ligase (EC 6.1.1.1) (Tyrosyl-tRNA synthetase)	-0.505126	-0.0199244	-0.152988	0.332214	0.000388604	0.981527	0.375805	0.0299518	14271	15818	12862	11192	12035	15425	16917	15028
C4_02990C	GST2	Q5AFB4	25.2	Gst2p	-1.10968	-0.118001	-2.11539	-1.12371	0.0977292	0.973629	0.000336109	0.0893976	1712	2967	1081	1350	318	807	519	672
C4_03000C	C4_03000C	A0A1D8PLQ2	28.2	Uncharacterized protein	0.0266812	0.0444554	-0.417149	-0.399375	0.973474	0.978763	0.148919	0.178295	38252	38795	43519	45183	31909	25405	33976	37404
C4_03020W	MGM1	Q5AFB7	99.9	Dynamin-related GTPase	-0.263776	0.358678	-0.40576	0.216695	0.548671	0.558873	0.289203	0.630034	3212	3383	3236	2989	2834	2094	3645	4010
C4_03030C	NAN1	Q5AFB9	94	Nan1p	-9.72326	-0.584901	1.05048	10.1888	0.0048246	0.973629	0.806225	0.00324267	271	0	0	0	196	393	367	83
C4_03050C	C4_03050C	A0A1D8PLQ3	64.7	Gly-Xaa carboxypeptidase	-5.62256	1.18197	0.248344	7.05287	0.0240226	0.876012	0.949437	0.00366545	2892	2018	119	0	4791	698	6535	9409
C4_03080W	C4_03080W	A0A1D8PLR3	93.8	Uncharacterized protein	-0.814835	0.567572	-1.41322	-0.0308154	0.163662	0.545499	0.00572824	0.982135	5226	7185	4089	3887	3010	1521	4001	4265
C4_03090W	C4_03090W	Q5AFC5	30.4	Transcription initiation factor IIA large subunit	1.4022	-0.185575	0.0567832	-1.53099	0.796965	1	0.995073	0.752908	251	0	367	392	243	0	68	213
C4_03130W	C4_03130W	A0A1D8PLR2	70.6	GPI-anchor transamidase subunit	-0.775753	0.0851276	0.675046	1.53593	0.477714	0.990588	0.518581	0.0933485	209	280	219	109	180	645	463	529
C4_03140C	C4_03140C	Q5AFD1	34.1	Elongator subunit	2.19426	0.387979	0.224507	-1.58178	0.00069084	0.834483	0.815632	0.019976	80	116	584	436	138	87	193	165
C4_03150W	C4_03150W	Q5AFD2	125	mRNA-binding U2 snRNP complex subunit	8.89782	-0.326458	9.5795	0.355223	6.32806e-07	0.937011	6.54343e-08	0.79896	0	0	115	85	109	180	104	166
C4_03180W	NCP1	A0A1D8PLR7	76.6	NADPH--cytochrome P450 reductase (CPR) (P450R) (EC 1.6.2.4)	0.413955	-0.108705	0.494752	-0.027909	0.0106007	0.787761	0.00153142	0.921867	6020	5135	8879	7997	7062	8902	8661	8834
C4_03200C	C4_03200C	A0A1D8PLR8	33.7	Hydroxyacyl-thioester dehydratase	0.952159	0.00441305	1.01208	0.0643292	0.335053	1	0.277483	0.974285	135	95	299	210	142	343	182	380
C4_03270W	RPF1	Q5AFD8	34.8	rRNA-binding ribosome biosynthesis protein	-1.44845	-0.813479	0.80945	1.44442	0.651193	0.934417	0.800426	0.636426	156	94	0	99	99	367	112	189
C4_03280W	MSN5	A0A1D8PLT4	142.4	Karyopherin	-2.09166	-0.413106	-2.25182	-0.573267	1.21653e-14	0.392499	8.33106e-17	0.0766344	8425	9754	2528	2304	1437	2487	1876	1552
C4_03290W	C4_03290W	A0A1D8PLT5	102.1	XPGI domain-containing protein	-0.729087	0.235849	-0.697122	0.267813	0.530236	0.960206	0.522818	0.846218	1340	1139	319	1324	643	919	1327	826
C4_03330W	IPK1	Q59KN8	42.9	Inositol-pentakisphosphate 2-kinase (EC 2.7.1.158) (Inositol-1,3,4,5,6-pentakisphosphate 2-kinase) (Ins(1,3,4,5,6)P5 2-kinase) (InsP5 2-kinase)	0.723088	-0.242799	2.36066	1.39477	0.356815	0.926399	0.000105816	0.0360122	184	242	363	428	636	1650	1322	884
C4_03360C	VTC4	Q59PH5	82.3	Vtc4p	0.789722	0.43438	1.3617	1.00636	0.159005	0.677033	0.00544106	0.0543226	2725	3534	6691	5586	10415	5224	12480	13549
C4_03370C	C4_03370C	A0A1D8PLT3	17.8	Uncharacterized protein	0.165362	-0.148033	0.419606	0.106211	0.903868	0.971659	0.65555	0.934891	690	319	578	702	410	1006	732	735
C4_03390W	CSH3	A0A1D8PLU5	26.2	Csh3p	-0.450109	0.4627	0.00579223	0.918601	0.4194	0.569482	0.996607	0.0481643	825	1445	1059	826	892	1438	1812	1942
C4_03410W	C4_03410W	A0A1D8PLT6	34.4	Mitochondrial 54S ribosomal protein YmL22	-0.707113	-0.195925	-0.543716	-0.0325275	0.0101985	0.76626	0.0553453	0.953287	4957	4370	3548	2951	2458	4123	3237	3468
C4_03450C	JAB1	Q59PG6	69.5	COP9 signalosome complex subunit 5 (EC 3.4.-.-)	-1.19016	-0.443158	0.389815	1.13682	0.195118	0.840082	0.715554	0.211894	99	249	79	92	204	256	162	239
C4_03470C	ECE1	Q07730	28.9	Extent of cell elongation protein 1 [Cleaved into: ECE1-I; ECE1-II; Candidalysin ECE1-III; ECE1-IV; ECE1-V; ECE1-VI; ECE1-VII; ECE1-VIII]	1.51283	0.565455	0.358668	-0.588711	2.45215e-13	0.037813	0.152021	0.0114617	3084	3221	9119	11130	3555	4660	7002	7341
C4_03520C	RBT1	Q59TP1	73.6	Cell wall protein RTB1 (Repressed by TUP1 protein 1)	3.83228	0.646676	2.18617	-0.999434	0.00220915	0.865364	0.108567	0.541383	493	50	4416	4426	335	2359	2422	2262
C4_03540C	ECM38	A0A1D8PLV5	63.7	Ecm38p	-7.88929	-0.568662	2.44309	9.76372	0.0178135	0.971814	0.468662	0.002603	0	78	0	0	202	220	151	188
C4_03550W	RAD2	A0A1D8PLU8	115	SsDNA endodeoxyribonuclease	0.696844	-0.745504	1.50689	0.0645372	0.374878	0.4988	0.0190062	0.963168	160	215	296	386	330	779	400	360
C4_03560W	C4_03560W	A0A1D8PLU9	88	Adaptin_N domain-containing protein	-9.10363	0.278955	1.49726	10.8798	0.00536087	0.990588	0.689476	0.000707904	0	181	0	0	240	269	449	282
C4_03590C	OSH3	Q59TM0	95.2	Oxysterol-binding protein related protein	-1.95816	0.668797	-2.88984	-0.262885	4.23535e-26	0.00344555	2.80499e-56	0.282407	61680	68304	17263	20400	8133	9595	15168	18279
C4_03600C	C4_03600C	Q5A2I3	54.4	RING-type domain-containing protein	0.662998	-1.92231	0.0687538	-2.51656	0.920837	0.834822	0.993853	0.55959	230	223	855	0	273	197	148	0
C4_03620C	CDR3	A0A1D8PLV0	46.4	Cdr3p	-1.54713	0.108431	-0.460393	1.19516	0.0785938	0.981527	0.669832	0.193935	956	518	330	247	750	287	687	703
C4_03690C	C4_03690C	A0A1D8PLW5	15.2	Uncharacterized protein	-0.116378	-1.00653	0.313039	-0.577112	0.921254	0.230535	0.688861	0.424051	377	330	353	384	534	330	279	245
C4_03700W	C4_03700W	A0A1D8PLV7	62.1	MFS domain-containing protein	1.07024	-9.58685	-0.714336	-11.3714	0.822433	0.0101662	0.864196	0.000431549	124	265	369	542	0	261	0	0
C4_03730C	TRM5	Q59TN1	51.8	tRNA (guanine(37)-N1)-methyltransferase (EC 2.1.1.228) (M1G-methyltransferase) (tRNA [GM37] methyltransferase) (tRNA methyltransferase 5)	0.407765	-0.309915	0.263277	-0.454403	0.585682	0.840082	0.72846	0.524204	1244	1420	1852	2129	869	2487	1489	1602
C4_03740W	C4_03740W	Q59TN2	34	Exosome non-catalytic core subunit	0.175464	-0.333631	-0.107129	-0.616225	0.64821	0.464953	0.78123	0.0286662	7311	8419	10096	9989	5463	9562	7186	6686
C4_03770W	C4_03770W	A0A1D8PLW9	19.1	Uncharacterized protein	1.95464	0.0991053	2.34053	0.484988	1.25409e-28	0.871	7.80752e-41	0.0173352	3090	3854	16697	13856	17609	17651	21605	23520
C4_03780C	C4_03780C	A0A1D8PLX3	52.1	Putative RNA methyltransferase	0.985492	-0.385604	0.871119	-0.499977	0.167689	0.814494	0.215154	0.538734	367	519	809	1154	645	1012	478	1014
C4_03790W	RPN6	A0A1D8PLW8	49.4	Proteasome regulatory particle lid subunit	0.517904	0.0700607	-0.494094	-0.941938	0.0821729	0.964155	0.0917784	0.000482127	45996	52906	66193	92542	30165	41290	43107	45212
C4_03800C	NUP84	A0A1D8PLW7	96.3	Nuclear pore complex protein	-0.559914	-0.368203	1.65987	1.85158	0.548671	0.858135	0.0206451	0.0102715	490	207	367	180	1118	1103	1126	927
C4_03810W	ATG20	Q59TN9	81.2	Autophagy-related protein 20	0.43197	2.63423	-1.8484	0.353861	0.916112	0.43692	0.454937	0.922903	227	183	317	310	0	126	378	472
C4_03830W	C4_03830W	A0A1D8PLX4	166.4	tRNA (Guanosine(18)-2'-O)-methyltransferase	-0.862535	0.509755	0.299073	1.67136	0.146917	0.61356	0.668994	0.00133174	1068	1506	787	810	1020	2267	2074	3339
C4_03850W	C4_03850W	A0A1D8PLY0	65.2	FG-nucleoporin	0.448938	0.39982	-0.153115	-0.202232	0.208703	0.434166	0.714982	0.627446	1403	1028	1852	1907	950	1279	1745	1719
C4_03900C	RAM1	A0A1D8PLY3	66.6	Protein farnesyltransferase subunit beta (FTase-beta) (EC 2.5.1.58)	7.45664	1.54077	8.42268	2.50681	0.168186	0.937513	0.0981179	0.686301	0	0	77	0	116	0	197	244
C4_03930C	C4_03930C	A0A1D8PLY2	16.7	RNA-binding signal recognition particle subunit	-1.13887	0.0427963	-0.268491	0.913175	5.9244e-06	0.980257	0.392938	0.000506228	1289	1075	673	549	894	1097	1253	1172
C4_03940C	PYC2	A0A1D8PLY4	129.6	Pyruvate carboxylase (EC 6.4.1.1)	0.0501436	0.341829	-0.0258252	0.26586	0.628954	3.71062e-06	0.807569	0.000247239	18275	18032	22785	19893	16441	19659	26525	27678
C4_04050C	RHD3	Q5A5U4	21.5	Cell wall protein RHD3 (LDG family protein 7) (Predicted GPI-anchored protein 29) (Repressed during hyphae development protein 3)	0.417553	-0.105221	0.654154	0.131381	0.530236	0.971659	0.253215	0.870956	2303	2356	3756	3306	4730	2415	4360	3801
C4_04090C	C4_04090C	A0A1D8PM03	66.7	Calnexin	1.77196	0.897317	1.02095	0.146309	2.99242e-05	0.12946	0.0257907	0.832371	329	587	1881	1657	992	855	2023	2114
C4_04100C	ECM1	A0A1D8PLZ5	22.5	Ecm1p	0.109773	-0.170922	1.37837	1.09767	0.959785	0.972467	0.13715	0.265922	976	1389	1506	1381	1294	5228	4827	1656
C4_04130W	C4_04130W	Q5A5V4	25	Uncharacterized protein	-2.40983	0.616661	0.254732	3.28122	0.324381	0.945798	0.938979	0.141624	298	214	115	0	300	316	633	490
C4_04140W	C4_04140W	A0A1D8PM02	42.5	Endo/exonuclease/phosphatase domain-containing protein	-2.44707	-0.883056	0.422061	1.98608	0.39299	0.924463	0.907535	0.493667	1220	862	456	0	279	2757	1296	509
C4_04150C	PDB1	Q5A5V6	41.3	Pyruvate dehydrogenase E1 component subunit beta (EC 1.2.4.1)	-0.399617	-0.00564919	-0.0524414	0.341527	0.0047393	1	0.795958	0.0192023	43823	38308	36279	34320	34842	45736	46251	48434
C4_04160W	C4_04160W	Q5A5V8	57.8	Uncharacterized protein	0.0583134	0.0615257	0.735185	0.738398	0.92328	0.971814	0.0139952	0.0152977	4692	5062	6243	5290	9129	6962	10047	10258
C4_04170C	AXL2	A0A1D8PM01	101.8	Axl2p	0.894352	0.935414	0.844331	0.885394	0.3551	0.496738	0.361056	0.349756	681	1216	3121	963	2192	1115	3534	4257
C4_04210C	SOH1	Q59P87	17.7	Mediator of RNA polymerase II transcription subunit 31 (Mediator complex subunit 31)	24.1935	0.925783	23.6504	0.382697	7.77931e-16	0.942919	3.69391e-15	0.944831	0	0	406	347	418	0	330	712
C4_04220W	DUO1	Q59P88	19.5	Duo1p	0.856839	-1.71296	0.363519	-2.20628	0.824372	0.754962	0.919887	0.440328	177	107	284	299	282	66	132	0
C4_04240C	C4_04240C	A0A1D8PM19	80.9	Uncharacterized protein	0.668739	-0.572209	0.374394	-0.866554	0.562946	0.797754	0.759399	0.417519	304	556	626	901	774	297	334	565
C4_04260C	FZO1	Q59P94	99.2	Mitofusin	0.568193	-0.164155	0.89104	0.158692	0.00394733	0.704917	1.39228e-06	0.534103	3432	4487	6806	6472	6562	8317	7928	7754
C4_04280C	IRC6	Q59P96	31.8	Increased recombination centers protein 6	-1.11767	0.599672	-0.389353	1.32799	0.155987	0.678052	0.671235	0.0731911	105	104	66	44	71	91	174	115
C4_04290W	SEC15	A0A1D8PM29	103.4	Exocyst complex component SEC15	0.854052	0.628565	0.282449	0.0569617	0.326105	0.678467	0.783575	0.974285	1375	2168	5992	1462	2074	2256	3763	4207
C4_04310W	COX11	Q59PA0	31.3	Cox11p	-10.1627	0	-9.9943	0	0.0962315	1	0.0933537	1	234	137	0	0	0	0	0	0
C4_04320W	FRE10	Q59PA1	80.9	Fre10p	-1.63315	9.07787	-11.9258	-1.21482	0.00753086	2.39815e-07	1.66553e-13	0.0636827	589	834	260	258	0	0	98	139
C4_04330C	C4_04330C	A0A1D8PM15	31.6	WW domain-containing protein	-0.307083	0.291835	-0.187891	0.411026	0.448314	0.649666	0.655955	0.265922	4517	5295	4529	4439	4848	3683	5993	6645
C4_04340C	YFH1	Q59PA3	19.8	Ferroxidase	0.503077	-1.78187	0.375873	-1.90908	0.556161	0.0162274	0.660134	0.00322791	1970	2936	4118	3747	1446	5283	1190	1021
C4_04350W	C4_04350W	Q59PA4	24.4	Uncharacterized protein	0.0715745	-0.648093	1.90673	1.18707	0.985728	0.773381	0.0450317	0.26487	2174	3325	5146	1556	15657	3895	6270	9510
C4_04370C	VAC7	Q59PA6	86.5	Vac7p	1.38771	0.249428	0.137011	-1.00127	0.00121188	0.835063	0.827953	0.0276057	1705	1717	5077	5054	2310	1382	2678	2684
C4_04390W	C4_04390W	A0A1D8PM41	14.1	Ribosomal 60S subunit protein L22B	0.0555963	1.31448	-0.666377	0.592508	0.946529	0.000631288	0.0861016	0.140427	4314	2962	5206	3458	1987	2691	7591	6087
C4_04410C	LYS4	Q5A644	74.4	Homoaconitase, mitochondrial (EC 4.2.1.36) (Homoaconitate hydratase)	-0.0449649	0.33891	-0.148044	0.235831	0.83497	0.0225437	0.315423	0.085837	10067	11080	12217	11020	9182	10045	13689	15253
C4_04430W	MRP8	Q5A646	23.4	Mrp8p	-0.0966918	-0.263192	-0.202543	-0.369043	0.895757	0.787761	0.696658	0.441115	4122	3198	4031	3741	3667	2634	2871	3503
C4_04440W	C4_04440W	Q5A647	31.3	Sec63 complex subunit	-0.550741	-0.0746463	0.611606	1.0877	0.695869	0.99699	0.623573	0.345146	772	457	837	150	672	1275	934	1215
C4_04460C	SAK1	Q5A650	155.8	Serine/threonine protein kinase	1.69379	-0.267162	1.54264	-0.418313	1.07771e-22	0.386593	7.31081e-19	0.0396095	3880	4507	14394	16183	10835	13957	11590	12743
C4_04470W	SAP10	Q5A651	49.3	Candidapepsin-10 (EC 3.4.23.24) (ACP 10) (Aspartate protease 10) (Secreted aspartic protease 10)	0.278998	-1.58355	2.37774	0.515198	0.991802	0.932343	0.678286	0.953287	68	0	0	90	157	207	141	0
C4_04480C	EFB1	A0A1D8PM35	23.5	Translation elongation factor 1 subunit beta	-0.234386	-0.576652	0.0989832	-0.243283	0.297591	0.0059198	0.696658	0.266232	123254	115085	116840	112684	102006	159688	103575	101665
C4_04500C	EFM5	Q5A653	29.4	Protein-lysine N-methyltransferase EFM5 (EC 2.1.1.-) (Elongation factor methyltransferase 5)	0.0792738	0.427482	0.765091	1.1133	0.798831	0.0704784	2.04227e-05	3.07613e-10	3797	4198	4782	4769	5624	8248	11144	10741
C4_04510W	C4_04510W	A0A1D8PM51	159.9	Transcription factor TFIIIC subunit	0.07841	-1.67458	-0.987779	-2.74077	1	0.739071	0.74275	0.279113	275	712	625	551	144	374	183	0
C4_04520W	PXR1	Q5A660	31.4	Protein PXR1 (PinX1-related protein 1)	-1.03284	-0.171643	-1.32319	-0.461993	0.25287	0.967989	0.110546	0.663265	1237	424	543	389	244	445	322	390
C4_04530C	PHR1	P43076	59.4	pH-responsive protein 1 (pH-regulated protein 1)	-2.52918	0.675296	-1.88951	1.31497	0.352917	0.946596	0.486012	0.668881	565	441	0	188	166	101	184	339
C4_04560C	C4_04560C	A0A1D8PM45	31.6	Uncharacterized protein	10.8003	1.10414	9.20791	-0.488248	5.45203e-10	0.461073	1.82388e-07	0.692813	0	0	244	486	86	137	267	294
C4_04580W	ZDS1	A0A1D8PM39	185.8	Zds1p	0.182522	0.318558	-0.28856	-0.152524	0.794823	0.758164	0.602521	0.815635	1279	1157	1902	1260	1104	879	1249	1742
C4_04590W	SCS7	Q5A668	44.4	Ceramide very long chain fatty acid hydroxylase (EC 1.-.-.-)	-0.985332	1.01666	-2.83831	-0.83632	0.0544168	0.108554	1.59219e-10	0.111969	1703	1764	992	989	154	350	506	672
C4_04660C	C4_04660C	Q5A675	109.2	Ubiquitin carboxyl-terminal hydrolase (EC 3.4.19.12)	-1.01548	-0.501217	0.437461	0.951724	0.000441951	0.237799	0.179555	0.00125903	759	739	468	375	1035	999	806	914
C4_04700W	SSZ1	Q5A678	58.5	Ssz1p	0.099013	0.138584	-0.239541	-0.19997	0.619573	0.621272	0.125535	0.224703	31436	28212	37380	35065	22972	28269	34954	31713
C4_04720W	C4_04720W	A0A1D8PM44	36.1	Methylenetetrahydrofolate dehydrogenase (NAD(+))	-1.89573	-0.0943648	-0.990759	0.810602	5.5256e-13	0.942919	0.00039417	0.0059083	10749	13795	4493	3031	6187	6192	6187	7682
C4_04730W	BAS1	Q5A683	84.5	Bas1p	-0.89367	0.303453	-1.26004	-0.0629152	0.16559	0.854348	0.0301905	0.956819	1500	960	654	839	343	726	820	702
C4_04760C	C4_04760C	A0A1D8PM63	29.9	Uncharacterized protein	3.49091	-0.423245	4.27353	0.359378	1.06947e-07	0.805549	3.42633e-11	0.69938	16	29	246	321	312	584	444	330
C4_04780W	PMT6	Q5A688	94.9	Dolichyl-phosphate-mannose--protein mannosyltransferase 6 (Protein mannosyltransferase 6) (EC 2.4.1.109)	-0.25413	0.787752	0.833903	1.87579	0.67504	0.167232	0.0570601	2.36651e-06	675	494	660	461	1098	988	1896	2433
C4_04800W	C4_04800W	A0A1D8PM53	38.7	Reticulon-like protein	1.35771	0.260051	1.24165	0.143992	5.66892e-15	0.403333	1.31367e-12	0.56637	9623	8525	26706	25990	20021	23404	33781	27779
C4_04810C	TRM8	Q5A692	37.6	tRNA (guanine-N(7)-)-methyltransferase (EC 2.1.1.33) (Transfer RNA methyltransferase 8) (tRNA (guanine(46)-N(7))-methyltransferase) (tRNA(m7G46)-methyltransferase)	-0.909134	-1.31201	-0.0399631	-0.442837	0.335249	0.244919	0.978733	0.684434	599	815	538	323	309	1146	355	307
C4_04820C	C4_04820C	Q5A693	29.1	Mitochondrial 54S ribosomal protein YmL11	-0.0668749	-0.419062	0.329603	-0.0225846	0.953332	0.678052	0.591617	0.985878	1836	1889	2056	1971	2897	1690	1814	2391
C4_04830W	DCR1	A0A1D8PM62	68.7	Ribonuclease III	0.208738	-1.21572	-0.401938	-1.8264	0.855025	0.18599	0.641867	0.00655376	390	802	811	744	305	626	185	280
C4_04870C	C4_04870C	A0A1D8PM60	88.2	Uncharacterized protein	0.899651	0.171076	0.587892	-0.140683	3.68657e-06	0.706874	0.0042145	0.607841	1088	1243	2583	2345	1636	1903	2521	2199
C4_04890C	RPL24A	Q5A6A1	17.4	Ribosomal 60S subunit protein L24A	-0.921856	-1.1239	0.0456711	-0.156377	2.09326e-12	4.30799e-17	0.825387	0.370457	33399	30443	21571	16816	30183	36597	17888	18387
C4_04900W	RPL30	A0A1D8PM75	11.5	Ribosomal 60S subunit protein L30	-0.768594	0.0369562	-0.756844	0.0487053	3.83564e-05	0.974474	5.07516e-05	0.877915	55722	43925	34232	32150	28414	31123	34089	38617
C4_04910C	SPC34	A0A1D8PM85	28.3	Spc34p	-0.279827	1.05943	-0.530367	0.808895	0.828588	0.385404	0.59022	0.385839	2201	1881	2051	1771	2113	586	3540	3528
C4_04970C	C4_04970C	A0A1D8PM81	9.4	MICOS complex subunit MIC10	-0.00131107	-0.534164	-0.0654647	-0.598317	1	0.262218	0.896171	0.0868358	5956	5382	6494	6338	3792	7427	4334	4646
C4_04980W	C4_04980W	Q5A6A8	62.2	Uncharacterized protein	1.23306	-0.962697	-1.24545	-3.4412	0.904134	0.976138	0.875768	0.632322	0	115	318	0	44	0	29	0
C4_05010W	C4_05010W	A0A1D8PM77	57.3	WD_REPEATS_REGION domain-containing protein	-1.15974	-0.281419	-1.17926	-0.300934	0.0120882	0.814494	0.00958197	0.623613	1426	1437	664	780	736	513	587	661
C4_05020W	IMG2	A0A1D8PM86	14.3	Mitochondrial 54S ribosomal protein IMG2	0.0312023	0.114079	0.198929	0.281805	0.992576	0.967989	0.778914	0.685522	57092	58459	74855	59491	89089	39430	82168	90006
C4_05030C	SSK2	A0A1D8PM87	168	MAP kinase kinase kinase (EC 2.7.11.-)	7.7016	-0.553446	8.08277	-0.172283	0.00014944	0.961692	5.89001e-05	0.974285	0	93	11274	10393	11003	14288	10406	9918
C4_05040W	C4_05040W	A0A1D8PM82	8.4	Ubiquitin-like protein	0.460109	0.810484	-0.0721224	0.278253	0.785826	0.739712	0.968874	0.868759	925	1703	1971	2097	768	1830	600	4699
C4_05070C	ARG8	A0A1D8PM83	50.2	Acetylornithine transaminase	1.87904	1.51206	0.488228	0.121248	0.00175432	0.037813	0.518575	0.908674	885	410	2879	2552	566	1337	2960	3285
C4_05090C	SRB8	A0A1D8PM80	199.9	Srb8p	7.41865	-1.16081	9.39631	0.816851	0.189835	0.966334	0.0708966	0.921303	0	0	75	0	163	78	0	135
C4_05100C	MYO5	Q59MQ0	146.9	Myosin-5 (Class I unconventional myosin MYO5) (Type I myosin MYO5)	-0.157191	-0.0064627	-0.665479	-0.514751	0.64821	1	0.00574976	0.0438304	9086	12540	11490	10458	5913	7932	8695	7525
C4_05130C	ALD6	A0A1D8PM94	58.3	Ald6p	1.93563	0.648299	-0.154744	-1.44208	6.28536e-18	0.0277804	0.637315	6.42086e-10	2594	3223	14794	10561	2254	3058	4485	5332
C4_05140C	GDB1	Q59MN2	173.8	Bifunctional 4-alpha-glucanotransferase/amylo-alpha-1,6-glucosidase	2.70446	-0.242866	3.50392	0.556601	6.67312e-23	0.727724	4.33203e-38	0.095022	4666	4905	37469	33299	36891	75656	51892	58162
C4_05150W	VAC8	Q59MN0	63.4	Vacuolar protein 8	-0.242937	-0.338106	0.0543365	-0.0408331	0.505615	0.479671	0.90106	0.936007	29722	27375	28520	26212	21152	40153	28242	28008
C4_05160C	C4_05160C	A0A1D8PM89	59.5	Uncharacterized protein	1.19315	0.344999	0.521233	-0.326915	0.105359	0.862031	0.533744	0.728822	93	72	187	238	120	118	217	143
C4_05170C	NBP35	Q59MP1	35.4	Cytosolic Fe-S cluster assembly factor NBP35 (Nucleotide-binding protein 35)	0.574309	2.3559	-1.65441	0.127178	0.00121121	3.67283e-47	5.0788e-24	0.594208	2951	3313	5991	4622	947	1060	6102	6100
C4_05180C	C4_05180C	A0A1D8PM92	156.3	Nucleocytoplasmic transporter	0.643008	-0.305889	0.20566	-0.743237	0.420626	0.878594	0.821024	0.320804	1116	905	2335	1293	1471	811	880	1391
C4_05190C	EDC3	A0A1D8PM93	57	Edc3p	0.755131	0.586715	0.602048	0.433632	0.281298	0.602062	0.388035	0.575142	2235	2088	3773	4451	4472	1878	6017	5798
C4_05230C	RIX1	Q59RA0	87.6	Pre-rRNA-processing protein RIX1	-0.608317	0.0168641	-0.0339756	0.591206	0.247883	1	0.964025	0.25602	5792	5321	4398	3880	6835	3785	6264	6918
C4_05240C	VPH1	Q59R99	93.3	V-type proton ATPase subunit a	1.28158	-0.0247477	2.5313	1.22497	0.217474	1	0.00458696	0.235203	657	417	2670	407	2985	3294	3612	3727
C4_05260W	C4_05260W	A0A1D8PMB2	38	Elongator subunit	-6.77003	-1.78498	4.28395	9.269	0.0406272	0.789	0.138463	0.00319086	35	0	0	0	509	151	94	147
C4_05280W	USO1	A0A1D8PMA2	246	Uso1p	-0.0589833	0.201793	-0.246274	0.0145022	0.885843	0.635974	0.323659	0.979055	8164	10125	10967	8969	7804	7638	10070	11176
C4_05300W	XKS1	A0A1D8PMB3	68.9	Xylulokinase	-1.0706	-0.22945	-1.66003	-0.818885	0.000119008	0.728961	4.49862e-10	0.00553639	4834	5461	2453	3058	1349	1976	1707	1620
C4_05310W	C4_05310W	A0A1D8PMA4	56.6	Uncharacterized protein	-0.516304	-0.540867	0.736146	0.711583	0.656824	0.792862	0.451628	0.489538	150	74	122	59	164	217	146	163
C4_05320W	LYS1	P43065	42.4	Saccharopine dehydrogenase [NAD(+), L-lysine-forming] (SDH) (EC 1.5.1.7) (Lysine--2-oxoglutarate reductase)	1.28231	0.718812	0.0953392	-0.468158	6.58892e-14	0.000254692	0.710783	0.0160233	31539	29487	84960	83135	33390	31950	67128	61466
C4_05330C	C4_05330C	A0A1D8PMA9	54.7	Uncharacterized protein	7.85921	-0.724186	9.78093	1.19753	0.0253765	0.967436	0.00354997	0.786928	0	0	0	92	152	175	144	90
C4_05370W	PUF3	A0A1D8PMA5	102.1	mRNA-binding protein	0.0729784	0.0361289	0.484749	0.447899	0.929746	0.99363	0.286571	0.345146	1227	1408	1513	1615	1262	2555	2367	2158
C4_05390W	C4_05390W	Q59P08	40.7	Glyoxylate reductase	0.0832093	-0.690877	0.916292	0.142206	0.930975	0.324614	0.0566971	0.842603	1057	1072	1187	1356	1307	2870	1635	1344
C4_05450C	CBR1	Q59P03	32.5	NADH-cytochrome b5 reductase 1 (EC 1.6.2.2) (Microsomal cytochrome b reductase)	-0.339957	0.0475377	-0.839383	-0.451889	0.81241	1	0.409828	0.70573	5503	5147	4984	4561	755	5678	3476	3908
C4_05460C	OFD1	A0A1D8PMB7	70.8	Oxidative DNA demethylase	-0.48823	0.0992723	0.646623	1.23413	0.122097	0.937231	0.0255977	5.01651e-06	15519	12576	14049	8902	19401	25361	25344	31305
C4_05540W	HOM3	A0A1D8PMB8	59.6	Aspartokinase (EC 2.7.2.4)	-0.450236	0.658558	-1.52076	-0.411964	0.398474	0.303163	0.000190047	0.43406	18831	21552	16068	17281	8766	5001	13947	12640
C4_05550C	GVP36	Q5A473	36.1	Gvp36p	-0.155628	-0.729029	0.259607	-0.313794	0.53746	0.000249022	0.22846	0.136665	17068	14850	16709	15785	15699	23404	13463	14208
C4_05560C	ARO9	A0A1D8PMC5	58.8	Aromatic-amino-acid:2-oxoglutarate transaminase	0.363298	0.805765	0.821671	1.26414	0.520809	0.165702	0.0692733	0.00305703	266	306	418	414	569	433	1016	1102
C4_05570C	TUB4	A0A1D8PMD4	56.2	Tubulin gamma chain	-0.569981	-1.4768	-1.67345	-2.58027	0.888194	0.779652	0.523956	0.302099	278	195	136	221	41	115	0	65
C4_05580C	C4_05580C	Q5A470	34.9	Uncharacterized protein	-0.0496819	-0.137801	0.707987	0.619868	0.871829	0.714299	8.83081e-06	0.000167414	4383	5457	5495	5258	7354	8902	8775	8713
C4_05590W	C4_05590W	A0A1D8PMC0	314.4	Uncharacterized protein	0.0604139	0.15574	-0.0578345	0.037492	0.965824	0.942941	0.942944	0.975743	419	521	517	587	309	625	644	559
C4_05600W	GYP2	A0A1D8PMC9	108.1	Gyp2p	0.370783	-0.150814	2.54008	2.01848	0.715489	0.967989	9.34809e-05	0.00311267	124	336	313	354	996	1743	1214	1665
C4_05610C	C4_05610C	A0A1D8PMD5	113.9	Uncharacterized protein	0.296191	-0.268857	-0.87619	-1.44124	0.611369	0.805598	0.0457818	0.000523559	50252	59468	61887	88993	18929	43263	30606	28774
C4_05620C	C4_05620C	A0A1D8PMD7	17.5	Uncharacterized protein	-0.102814	-0.0102876	-0.669397	-0.57687	0.976876	1	0.635356	0.702331	225	252	291	215	115	193	298	55
C4_05630W	C4_05630W	Q5A462	35	DNA-directed RNA polymerase II core subunit	-0.644966	0.141251	-0.373234	0.412983	0.0755264	0.911572	0.339914	0.295056	3115	2332	2201	1769	1711	2600	3073	2488
C4_05640C	C4_05640C	A0A1D8PMD0	30.8	1-(5-phosphoribosyl)-5-[(5-phosphoribosylamino)methylideneamino] imidazole-4-carboxamide isomerase (EC 5.3.1.16) (5-proFAR isomerase) (Phosphoribosylformimino-5-aminoimidazole carboxamide ribotide isomerase)	0	-1.11382	11.1765	10.2425	1	0.533708	4.11644e-10	2.33927e-08	0	0	0	0	347	524	223	249
C4_05650W	C4_05650W	Q5A460	37.1	Uncharacterized protein	-0.716465	-0.243065	0.71332	1.18672	0.534537	0.956646	0.505649	0.235171	450	376	312	260	1006	289	601	775
C4_05660C	BRN1	A0A1D8PMC8	84.1	Condensin complex subunit 2	0	-8.96569	8.7041	0	1	0.278475	0.154756	1	0	0	0	0	141	0	0	0
C4_05670W	YME1	A0A1D8PME0	75.8	I-AAA protease	-0.331268	0.314839	-0.548051	0.0980563	0.240965	0.429969	0.0269693	0.786928	8919	8550	8707	7088	6376	5545	8469	9365
C4_05680W	PHO4	A0A1D8PMD1	71.4	Phosphate-sensing transcription factor	-0.302831	-0.0259339	0.453405	0.730303	0.524799	0.997457	0.269654	0.0554835	347	372	360	302	490	499	502	659
C4_05690W	SEC23	Q5A455	85.6	Protein transport protein SEC23	0.239449	0.386616	0.667324	0.81449	0.251375	0.0869318	8.41074e-05	1.39614e-06	7032	6646	9739	8594	10939	10869	15866	18225
C4_05760W	CGT1	A0A1D8PME6	52.2	mRNA-capping enzyme subunit alpha (EC 2.7.7.50) (GTP--RNA guanylyltransferase) (mRNA guanylyltransferase)	-0.0671361	-0.379706	1.28912	0.976547	0.963328	0.768797	0.0173852	0.0907848	161	143	147	180	325	431	407	276
C4_05790W	C4_05790W	A0A1D8PME8	146.3	Transport protein particle complex II subunit	-0.411229	-0.401963	0.668029	0.677295	0.642668	0.800155	0.357266	0.367743	126	94	99	89	138	221	182	135
C4_05810W	C4_05810W	Q5A441	52.6	J domain-containing protein	-0.776585	-0.0653584	-0.217574	0.493653	0.0147828	0.971659	0.586229	0.153997	2667	2378	1568	1757	1752	2693	2724	2243
C4_05820W	C4_05820W	A0A1D8PMF5	10.6	Uncharacterized protein	-0.718984	0.686286	0.469688	1.87496	0.6635	0.828398	0.774876	0.141624	435	325	258	265	148	988	1587	429
C4_05860W	C4_05860W	Q5A435	15	Prefoldin subunit 4	0.00486219	-0.00572742	-0.716101	-0.726691	1	1	0.00538187	0.00562355	4735	6162	6182	6168	3325	3323	4242	3656
C4_05890W	C4_05890W	Q5A431	19.8	Uncharacterized protein	0.479073	0.285034	1.6807	1.48666	0.673512	0.932343	0.0380552	0.0759453	111	58	160	110	323	213	313	484
C4_05960W	NIF3	A0A1D8PMG0	31	Nif3p	-0.305088	0.201616	-0.101987	0.404717	0.388082	0.770735	0.800426	0.209215	3112	2441	2935	2195	2414	2826	3176	3980
C4_06030W	CMD1	A0A1D8PMF8	16.5	Calmodulin	0.374396	-0.854149	0.184657	-1.04389	0.160466	0.000519437	0.525709	2.99033e-06	93827	96183	132631	145342	82690	139296	70046	73188
C4_06050W	MED3	A0A1D8PMH1	21.5	Med3p	-0.565719	0.285136	-1.15671	-0.305852	0.530236	0.914754	0.118466	0.760499	645	543	506	408	351	168	332	449
C4_06060W	VPS13	A0A1D8PMH5	348.5	Vacuolar protein sorting-associated protein	-0.548899	0.240723	-0.006917	0.782705	2.83888e-05	0.215747	0.979303	1.17397e-09	2560	2805	2237	1925	2446	2958	3632	3931
C4_06100W	CWH41	A0A1D8PMH9	96.2	Cwh41p	-0.690783	-0.0001052	0.264957	0.955635	0.0366049	1	0.489026	0.00233992	627	772	507	474	689	1027	1052	959
C4_06110C	TRP5	A0A1D8PMH6	76	Tryptophan synthase (EC 4.2.1.20)	-0.229469	-0.148681	-0.797239	-0.716452	0.242463	0.676611	3.59503e-07	8.44297e-06	12066	12133	11902	11471	7047	6921	7458	7602
C4_06120W	GDH3	A0A1D8PMH8	49.5	Glutamate dehydrogenase	-0.379094	0.194166	-0.265691	0.307569	0.0804183	0.613839	0.239174	0.169537	31445	29415	27402	25653	26457	24171	32987	36525
C4_06130W	C4_06130W	A0A1D8PMG9	430.7	PH domain-containing protein	1.20169	-0.312087	0.350714	-1.16307	8.17344e-08	0.433445	0.19071	3.76087e-07	18146	24744	52243	58811	23215	32430	25380	27355
C4_06170C	C4_06170C	Q5A199	20.7	Translation machinery-associated protein 20	-0.640378	-0.365294	-0.963114	-0.688029	0.000555861	0.162875	4.93407e-08	0.000225485	11303	9963	7755	7696	5212	5802	5390	4760
C4_06200W	C4_06200W	A0A1D8PMI0	7.8	Uncharacterized protein	0.448898	-0.187081	-0.299148	-0.935126	0.324381	0.875108	0.523956	0.0159603	779	1053	1235	1572	686	818	711	856
C4_06210C	C4_06210C	A0A1D8PMJ1	58.5	RNA-binding GTPase	-1.50522	-0.237754	-1.50649	-0.23902	7.81343e-25	0.362808	8.12056e-25	0.202979	11892	13336	5344	4734	3723	5331	4490	4531
C4_06230C	C4_06230C	Q5A1A4	78.6	Apyrase	-0.496516	0.215156	-0.764505	-0.0528328	0.265394	0.835063	0.0525318	0.941266	5285	5079	4278	4047	3620	2393	4047	4451
C4_06250C	SEC3	A0A1D8PMI1	88.1	GTP-Rho binding exocyst subunit	1.48766	-0.772206	1.87774	-0.382125	0.024603	0.480264	0.00288772	0.663129	154	371	1006	668	730	1244	646	702
C4_06270C	ERG26	Q5A1B0	39.2	Sterol-4-alpha-carboxylate 3-dehydrogenase (Decarboxylating)	9.3316	-0.739456	10.7806	0.709557	9.62702e-08	0.684198	4.24812e-10	0.521696	0	0	143	126	189	488	220	245
C4_06290W	C4_06290W	A0A1D8PMJ7	11.1	Chromatin DNA-binding EKC/KEOPS complex subunit	0.359783	-0.199322	0.0407449	-0.518359	0.00877499	0.344441	0.835435	7.69375e-05	2214	2232	3368	3100	2028	2616	2308	2469
C4_06350C	NUP60	A0A1D8PMK3	68.1	FG-nucleoporin	-0.178187	-0.0417527	0.475741	0.612176	0.810748	0.99363	0.361871	0.230205	1657	1978	2143	1519	2981	1997	2528	3365
C4_06390W	SOU1	P87219	30	Sorbose reductase SOU1 (EC 1.1.1.289) (Sorbitol utilization protein SOU1)	-0.528516	0.180144	-0.239001	0.469659	0.142162	0.837821	0.550168	0.193935	4227	3093	3024	2743	2531	3827	4632	3796
C4_06400C	VMA8	P87220	30	V-type proton ATPase subunit D (V-ATPase subunit D) (Vacuolar proton pump subunit D)	0.0480741	0.0349394	-0.442514	-0.455648	0.895757	0.976138	0.0250207	0.0228495	18520	19489	21679	22713	14243	13782	17661	16662
C4_06430C	C4_06430C	A0A1D8PML6	62.7	Uncharacterized protein	21.3616	2.17408	20.0059	0.818477	2.49245e-11	0.773845	4.94338e-10	0.868545	0	0	393	323	173	64	1311	0
C4_06450W	C4_06450W	A0A1D8PML5	15.8	YL1_C domain-containing protein	-1.12559	-0.612117	-2.08079	-1.56732	0.892836	0.981527	0.727211	0.812932	438	0	73	153	0	116	81	0
C4_06470W	C4_06470W	A0A1D8PMK4	23	Uncharacterized protein	-0.396917	-0.0303427	-0.600335	-0.23376	0.353434	0.995187	0.110021	0.617185	3740	4806	3433	3876	3100	2494	3016	3599
C4_06480C	CEK1	Q5A1D3	48.5	Extracellular signal-regulated kinase 1 (ERK1) (EC 2.7.11.24) (MAP kinase 1) (MAPK 1)	-1.96592	0.993999	0.122008	3.08193	0.491627	0.896301	0.976038	0.219618	138	53	0	53	119	88	126	377
[truncated: 1,268 more rows]

## Sheet: Protein-mRNA ratio
Gene ID	Gene	Accession	Group	Protein	WT_Gal_protein/mRNA log10(ratio)	WT_GalNAG_protein/mRNA log10(ratio)	PR13_Gal_protein/mRNA log10(ratio)	PR13_GalNAG_protein/mRNA log10(ratio)	5' UTR length log10(kb)	MW [kDa]	Gene length log10(kb)	WT_Gal_mRNA log10(FPKM)	WT_GalNAG_mRNA log10(FPKM)	PR13_Gal_mRNA log10(FPKM)	PR13_GalNAG_mRNA log10(FPKM)	WT_Gal_protein log10(LFQ)	WT_GalNAG_protein log10(LFQ)	PR13_Gal_protein log10(LFQ)	PR13_GalNAG_protein log10(LFQ)
C1_00060W	TUP1	P0CY34	hyphal regulator TF	Transcriptional repressor TUP1	4.92743	5.09449	4.75381	4.88378	1.6902	1.76042	3.18696	2.5833	2.5581	2.65459	2.59692	4.51073	4.65259	4.40841	4.4807
C1_00070W	MVD	A0A1D8PC43		Diphosphomevalonate decarboxylase (EC 4.1.1.33)	5.02686	5.16804	4.94909	4.85642	1.89209	1.5966	3.05652	2.36496	2.42592	2.30495	2.32292	4.39182	4.59397	4.25404	4.17934
C1_00110W	CCT8	Q5AB74		Chaperonin-containing T-complex subunit	4.59957	4.52268	4.74098	4.72657	1.04139	1.76492	3.21005	2.44046	2.55807	2.43363	2.48543	4.04003	4.08075	4.17461	4.212
C1_00130C	VPS53	Q5AB78		Vps53p	7.21077	4.57553	6.99851	4.7273	2.74586	1.90687	3.32201	-2.01487	-1.57553	-1.80539	-1.7273	2.1959	0	2.19312	0
C1_00140W	KEL1	Q5AB80		Kel1p	5.25659	5.22124	5.11311	5.32852	2.74586	2.05652	3.48515	1.85666	1.91107	1.97198	1.8813	4.11326	4.13231	4.08509	4.20982
C1_00150C	RIM8	Q9UW13		pH-response regulator protein palF/RIM8	3.55834	3.89691	3.50052	3.36889	2.06446	1.84011	3.27138	1.82637	1.65393	1.84681	1.72975	2.38471	2.55084	2.34733	2.09864
C1_00160C	C1_00160C	Q5AB84	Ribosomal proteins	Uncharacterized protein	4.19054	4.36846	4.41534	4.42133	1.20412	1.63849	3.0799	2.82423	2.79266	2.70535	2.54123	4.01477	4.16113	4.12069	3.96256
C1_00170W	LEU4	Q5AB86		2-isopropylmalate synthase	4.75228	4.76714	4.72367	4.88263	1.79239	1.80754	3.2403	1.99819	2.04336	2.13219	2.07074	3.75047	3.8105	3.85585	3.95337
C1_00180W	RPL16A	Q5AB87	Ribosomal proteins	Ribosomal 60S subunit protein L16A	1.65191	2.3016	2.99373	3.0406	1.4624	1.35411	2.7796	3.75803	3.76825	3.65565	3.70004	2.40993	3.06985	3.64938	3.74064
C1_00210C	C1_00210C	A0A1D8PC56		Uncharacterized protein	3.90827	3.98967	4.24607	4.22994	1.79934	1.64738	3.06221	2.65486	2.53114	2.65334	2.63844	3.56312	3.52081	3.89941	3.86838
C1_00220W	PHR2	O13318		pH-responsive protein 2 (pH-regulated protein 2)	4.74825	4.6915	4.68975	4.71231	2.02531	1.76864	3.21325	2.69724	2.85052	2.74702	2.87014	4.44549	4.54202	4.43677	4.58245
C1_00310W	PNS1	Q5AB93		Protein PNS1	3.20969	3.4414	3.85152	3.71568	2.83251	1.76343	3.19201	1.54236	1.3879	1.99296	1.91526	1.75205	1.8293	2.84448	2.63094
C1_00320W	C1_00320W	Q5AB94		Vacuolar protein sorting-associated protein 29	4.67052	4.36613	4.38876	4.49246	2.19033	1.46389	2.89487	1.96847	2.12425	2.05754	2.04403	3.63899	3.49038	3.4463	3.5365
C1_00330C	C1_00330C	A0A1D8PC71		CCR4-NOT core subunit	5.07585	7.65392	8.00134	5.59966	1.64345	1.32015	2.73878	1.60489	-0.871629	-1.21995	1.36653	3.68074	3.78229	3.7814	3.96619
C1_00340W	HBR1	Q8TG40		Adenylate kinase isoenzyme 6 homolog HBR1 (AK6) (EC 2.7.4.3) (Dual activity adenylate kinase/ATPase) (AK/ATPase) (Hemoglobin and proliferation-regulated protein 1) (Hb-regulated protein 1)	5.0121	4.77341	4.9135	4.95342	1.51851	1.45788	2.87274	2.26569	2.28738	2.18376	2.24339	4.27779	4.06079	4.09726	4.19681
C1_00350C	HMX1	Q5AB97		Hmx1p	3.28075	3.84923	3.19607	3.51029	1.81291	1.53148	2.94201	2.64764	2.12621	2.56018	2.14532	2.9284	2.97543	2.75626	2.65562
C1_00360W	CDC13	Q5AB98		Cdc13p	5.05277	1.63562	3.75154	3.71529		1.71012	3.12808	1.15849	1.36438	1.19785	1.34352	3.21125	0	1.94939	2.05881
C1_00380C	NAA25	Q5AB99		Uncharacterized protein	7.22692	7.03326	6.97185	6.92578	2.21219	1.93952	3.34967	-1.03268	-0.848856	-0.888887	-0.819415	3.19424	3.18441	3.08296	3.10636
C1_00400W	SVF1	Q5ABA2		Survival factor 1	4.90308	4.69416	4.67051	4.70393	1.92942	1.63347	3.05994	2.38789	2.34643	2.35908	2.38981	4.29097	4.04058	4.02959	4.09374
C1_00410C	C1_00410C	A0A1D8PC76		Aldehyde dehydrogenase	4.45309	4.46428	4.61096	4.65904	2.16732	1.78247	3.21165	1.99915	1.92859	2.11179	2.08895	3.45225	3.39287	3.72276	3.74799
C1_00420W	C1_00420W	Q5ABA5		Uncharacterized protein	4.2295	4.34101	4.32439	4.48297	1.57978	1.57171	2.98722	2.20089	2.09179	2.19994	2.20022	3.4304	3.43281	3.52433	3.68318
C1_00430W	ATG18	Q5ABA6		Autophagy-related protein 18	3.71194	4.32066	4.0836	4.01854	2.01703	1.79029	3.22427	1.67007	1.63165	1.75146	1.61695	2.38202	2.95231	2.83506	2.63548
C1_00440W	UBP6	A0A1D8PC77		Ubiquitin carboxyl-terminal hydrolase (EC 3.4.19.12)	4.71249	4.56086	4.68435	4.49518	1.97772	1.7332	3.17984	2.30743	2.45569	2.2467	2.41202	4.01993	4.01655	3.93105	3.9072
C1_00450C	C1_00450C	A0A1D8PC73		Uncharacterized protein	3.25395	3.38971	3.66649	3.54783	1.77815	1.22011	2.734	2.4919	2.50516	2.43629	2.5587	2.74586	2.89487	3.10278	3.10653
C1_00460W	C1_00460W	Q5ABA8		Uncharacterized protein	0.405996	0.285045	0.532184	2.56497	1.78533	1.0607	2.50515	2.594	2.71495	2.46782	2.64855	0	0	0	2.21352
C1_00470C	C1_00470C	Q5ABA9		N-acetylphosphatidylethanolamine-hydrolyzing phospholipase D	3.34312	3.3382	3.48479	3.59681	2.28556	1.70501	3.12222	1.5545	1.69118	1.5566	1.54776	1.89763	2.02938	2.04139	2.14457
C1_00480C	GCN20	Q5ABB0		Putative AAA family ATPase	4.27095	4.19287	4.41653	4.32671	1.4624	1.92891	3.35315	1.9691	2.0126	1.96051	2.00381	3.24005	3.20548	3.37703	3.33052
C1_00490C	TTR1	Q5ABB1		Dithiol glutaredoxin	3.20556	3.07552	2.80575	2.72399	1.91908	1.11727	2.55509	2.77102	2.81462	2.81698	2.95407	2.97658	2.89014	2.62273	2.67806
C1_00500C	GLO1	Q5ABB2		Lactoylglutathione lyase (EC 4.4.1.5) (Glyoxalase I)	4.87123	5.02201	4.49103	4.77723	2.65896	1.5966	3.01199	2.31114	2.33972	2.36766	2.44105	4.18237	4.36173	3.85869	4.21827
C1_00510W	C1_00510W	Q5ABB3		3-methyl-2-oxobutanoate hydroxymethyltransferase (EC 2.1.2.11)	3.85077	3.73144	4.1942	4.29837	1.81291	1.53275	2.96802	1.83586	1.88293	1.71024	1.75854	2.68664	2.61437	2.90445	3.0569
C1_00520W	C1_00520W	Q5ABB4		Phosphoglycerate mutase	3.5822	3.45465	3.03537	3.53716	1.54407	1.40654	2.82478	1.76708	1.85178	1.67644	1.76169	2.34928	2.30643	1.71181	2.29885
C1_00530C	C1_00530C	Q5ABB5		Uncharacterized protein	4.53558	1.72058	3.78782	1.65796	2.11727	1.95904	3.38757	1.27196	1.27942	1.35985	1.34204	2.80754	0	2.14768	0
C1_00560W	CNS1	Q5ABB8		HSP70/90 family co-chaperone	5.01176	4.68827	4.75636	4.60516	1.64345	1.65418	3.06893	1.71219	1.83865	1.73233	1.69793	3.72395	3.52692	3.48869	3.30309
C1_00590W	TUF1	Q5ABC3		Elongation factor Tu	5.42288	5.27974	5.49406	5.3789	1.89763	1.66932	3.10721	2.75235	2.9535	2.69607	2.87186	5.17523	5.23324	5.19013	5.25076
C1_00640C	RPO41	A0A1D8PCA4		DNA-directed RNA polymerase (EC 2.7.7.6)	5.19757	4.97616	5.24065	5.23524	2.03342	2.17114	3.59129	1.82341	1.98829	1.76517	1.83784	4.02098	3.96445	4.00582	4.07308
C1_00650C	SNF7	Q5ABD0		Vacuolar-sorting protein SNF7 (Vacuolar protein-sorting-associated protein 32)	4.24688	4.29556	4.30525	4.24824	2.43933	1.4133	2.83251	2.07472	2.11361	2.11504	2.13061	3.3216	3.40917	3.42029	3.37885
C1_00660C	C1_00660C	Q5ABD1		t-SNARE syntaxin	4.06298	4.54748	4.37221	4.2596	1.89763	1.58206	3.00561	1.76729	1.86808	1.81234	1.88248	2.83027	3.41556	3.18455	3.14208
C1_00700W	C1_00700W	Q5ABD5		Uncharacterized protein	3.40152	3.36565	3.43511	3.16702	1.75587	1.16732	2.56229	2.5375	2.64188	2.48501	2.76494	2.93902	3.00753	2.92012	2.93197
C1_00710C	TUB2	A0A1D8PC97		Tubulin beta chain	4.6989	4.82387	4.64295	4.5753	1.77815	1.69897	3.23754	2.53985	2.53283	2.50133	2.58158	4.23875	4.3567	4.14428	4.15688
C1_00730C	CMP1	A0A1D8PCA8		Serine/threonine-protein phosphatase (EC 3.1.3.16)	4.01027	4.18802	3.80228	4.28502	2.54283	1.84261	3.26221	1.93273	1.92207	1.988	1.98472	2.943	3.11008	2.79029	3.26975
C1_00750C	VPS27	Q5ABD9		Vacuolar protein sorting-associated protein 27	4.4307	4.20832	3.79779	3.8634	2.16732	1.97727	3.40226	1.83835	1.82591	1.86591	1.8694	3.26905	3.03423	2.6637	2.7328
C1_00770C	ROT1	Q5ABP8		Protein ROT1	5.79248	5.48198	5.64439	5.61427	2.53656	1.47567	2.89321	1.48433	1.52566	1.56567	1.62962	4.27681	4.00764	4.21006	4.24389
C1_00790W	C1_00790W	A0A1D8PCC4		BBP1_C domain-containing protein	4.30326	4.35899	4.37643	4.27898	1.98677	1.62634	3.04139	0.925906	0.882807	1.03854	1.01105	2.22917	2.2418	2.41497	2.29003
C1_00810W	ALG13	Q5ABE5		UDP-N-acetylglucosamine transferase subunit ALG13 (EC 2.4.1.141) (Asparagine-linked glycosylation protein 13)	3.81262	4.06619	4.24174	4.28083	2.19866	1.53529	2.94498	0.850137	1.01299	0.697783	0.935339	1.66276	2.07918	1.93952	2.21617
C1_00820W	C1_00820W	Q5ABE6		PCI domain-containing protein	2.76621	3.86866	5.2716	5.85443	2.50515	1.60853	3.01953	0.233794	-0.868665	-0.929174	-0.72571	0	0	1.34242	2.12872
C1_00840C	NRM1	A0A1D8PCB2		Nrm1p	4.62987	5.98841	4.5483	6.40619	2.31806	1.80414	3.23805	-1.62987	-1.50411	-1.5483	-1.67783	0	1.4843	0	1.72835
C1_00850W	IHD2	Q5ABE9		Ihd2p	4.93042	4.69637	4.62789	4.26266	1.70757	1.45939	2.87274	1.16805	1.42519	1.46042	1.65089	3.09847	3.12156	3.08831	2.91355
C1_00860W	ATG3	Q5ABQ7		Autophagy-related protein 3 (Autophagy-related E2-like conjugation enzyme ATG3)	5.15763	5.3851	4.83436	4.94529	2.13988	1.58659	3.00043	1.3589	1.30541	1.45479	1.54114	3.51654	3.69051	3.28914	3.48643
C1_00870W	LRO1	A0A1D8PCB0		Phospholipid:diacylglycerol acyltransferase	5.70902	5.73569	5.54016	5.58599	2.17609	1.89542	3.32139	1.37406	1.52952	1.49607	1.41842	4.08307	4.26521	4.03623	4.00441
C1_00900W	RRS1	A0A1D8PCC8	Ribosomal proteins	Ribosome biogenesis regulatory protein	3.87168	4.00572	4.06492	4.21185	1.5563	1.36922	2.79029	2.08159	2.08507	1.81845	1.74791	2.95328	3.09079	2.88338	2.95976
C1_00910W	TRI1	A0A1D8PCC6		SWIB domain-containing protein	5.28992	4.6145	5.11443	4.53389	2.09342	1.46538	3.0026	-0.198252	0.291297	0.282636	0.640747	2.09167	1.9058	2.39707	2.17464
C1_00920W	C1_00920W	Q5ABF8		Uncharacterized protein	3.76788	1.60255	3.82054	3.59688	2.09342	2.16465	3.58388	1.27744	1.39745	1.33022	1.44254	2.04532	0	2.15076	2.03941
C1_00930C	SIN3	A0A1D8PCC3		Transcriptional regulator	5.48554	5.36884	5.29806	5.46583	2.3962	2.20385	3.66633	1.73201	1.6955	1.81389	1.78164	4.21755	4.06435	4.11195	4.24747
C1_00940W	RPB11	A0A1D8PCD0		DNA-directed RNA polymerase II core subunit	4.73962	4.97673	4.91823	4.88473	1.8451	1.15229	2.66087	2.20132	2.33248	2.08746	2.22292	3.94094	4.3092	4.0057	4.10765
C1_00950C	CDC5	Q5ABG0	Kinase	Serine/threonine-protein kinase (EC 2.7.11.21)	2.73909	3.62617	3.04208	3.22232	2.50786	1.87506	3.29248	1.8893	1.94379	1.95356	1.91122	1.62839	2.56996	1.99564	2.13354
C1_00960C	SET1	Q5ABG1		Histone-lysine N-methyltransferase, H3 lysine-4 specific (EC 2.1.1.43) (COMPASS component SET1) (SET domain-containing protein 1)	4.27889	4.63609	4.16063	4.57017	2.32634	2.07591	3.49443	0.665593	0.897298	1.10771	0.883145	1.94448	2.53339	2.26834	2.45332
C1_00990C	NMA111	A0A1D8PCD2		Nma111p	4.55564	4.30664	4.90851	5.0923	1.77815	2.03902	3.46731	1.91484	1.90966	1.8082	1.68353	3.47048	3.2163	3.71671	3.77583
C1_01010W	C1_01010W	A0A1D8PCD3		Uncharacterized protein	5.11389	5.07444	4.87703	4.76633	1.78533	1.25042	2.6721	2.27418	2.54963	2.28453	2.5029	4.38807	4.62408	4.16156	4.26923
C1_01030W	HMT1	Q5A943		Protein-arginine omega-N methyltransferase	4.09071	4.09464	4.31112	4.63602	1.74819	1.59439	3.00817	2.45682	2.40949	2.31527	2.20459	3.54753	3.50413	3.62639	3.84061
C1_01040W	C1_01040W	Q5A942		Peptide-methionine (R)-S-oxide reductase (EC 1.8.4.12)	2.88259	2.87713	2.93558	2.72963	2.2878	1.22272	2.6464	2.7549	2.83171	2.76425	2.87836	2.63749	2.70885	2.69984	2.60799
C1_01050C	C1_01050C	A0A1D8PCD8		Trans-2-enoyl-CoA reductase (NADPH)	5.86204	2.40263	5.39134	5.69808	1.88081	1.55871	2.9722	-0.956247	0.59737	-0.0420598	-0.357631	1.9058	0	2.34928	2.34044
C1_01060W	MBF1	Q5A940		Multiprotein-bridging factor 1	4.72073	4.9032	4.75835	4.70889	1.4624	1.21219	2.65801	3.18193	3.20921	3.09515	3.20434	4.90267	5.11241	4.8535	4.91323
C1_01090C	C1_01090C	Q5A937		Mitochondrial 37S ribosomal protein RSM27	2.57592	0.584281	0.715643	0.614484	2.25768	1.07918	2.48855	2.38312	2.41572	2.28436	2.38552	1.95904	0	0	0
C1_01110C	ZPR1	Q5A934		Zinc finger-containing protein	5.71031	4.73351	4.68415	4.85382	1.65321	1.75587	3.18441	2.10364	2.17605	2.04808	1.96874	4.81395	3.90956	3.73223	3.82256
C1_01140C	C1_01140C	Q5A932		CBM21 domain-containing protein	4.96377	4.91937	4.60319	4.59948	2.14301	1.89265	3.32263	1.462	1.6034	1.65111	1.67236	3.42578	3.52277	3.25431	3.27184
C1_01150C	PPM2	Q5A931		tRNA wybutosine-synthesizing protein 4 (tRNA-yW synthesizing protein 4) (EC 2.1.1.290) (EC 2.3.1.231) (Leucine carboxyl methyltransferase 2) (tRNA(Phe) (7-(3-amino-3-(methoxycarbonyl)propyl)wyosine(37)-N)-methoxycarbonyltransferase) (tRNA(Phe) (7-(3-amino-3-carboxypropyl)wyosine(37)-O)-methyltransferase)	4.61	4.50118	4.28229	4.44548	2.15836	1.89653	3.31576	1.49482	1.58178	1.55149	1.49154	3.10483	3.08296	2.83378	2.93702
C1_01160C	C1_01160C	A0A1D8PCE7		Exosome non-catalytic core subunit	4.37047	4.199	4.07591	4.11154	1.716	1.47567	2.90956	2.02808	1.93899	1.95792	1.89429	3.39855	3.13799	3.03383	3.00582
C1_01170C	ZCF17	A0A1D8PCF5		Zcf17p	5.17446	4.99572	4.98554	5.1952	2	1.9345	3.34557	1.39806	1.45668	1.41766	1.40222	3.57252	3.4524	3.40321	3.59742
C1_01190C	C1_01190C	Q5A927		N,N-dimethylaniline monooxygenase	1.6307	1.45504	3.18748	3.21968	1.49136	1.72428	3.14333	1.3693	1.54496	1.25185	1.44308	0	0	1.43933	1.66276
C1_01220C	C1_01220C	Q5A924		Uncharacterized protein	4.14724	4.7404	3.75981	3.58513	1.92428	1.43616	2.87622	1.19912	0.747444	1.49304	1.22778	2.34635	2.48785	2.25285	1.81291
C1_01240W	IFD3	Q5A923		Ifd3p	3.44653	3.33424	3.8193	3.65554	2.0607	1.59879	3.02078	1.61038	1.48858	1.72909	1.57491	2.0569	1.82282	2.54839	2.23045
C1_01250W	AIM9	Q5A922		Altered inheritance of mitochondria protein 9, mitochondrial (Found in mitochondrial proteome protein 29)	4.90785	5.12337	5.05788	5.01258	1.51851	1.8537	3.27277	1.91144	2.01808	1.89803	1.98865	3.81928	4.14145	3.9559	4.00124
C1_01260C	TRS20	Q5A920		TRAPP subunit	3.52376	3.5426	3.48618	3.48916	2.08991	1.233	2.65514	1.62546	1.62026	1.56882	1.71901	2.14922	2.16286	2.055	2.20817
C1_01300W	C1_01300W	Q5A915		Uncharacterized protein	4.31675	4.30946	4.30008	4.3503	1.77085	1.56703	2.99255	2.18901	2.21168	2.17841	2.27305	3.50576	3.52114	3.47849	3.62335
C1_01320W	MRS7	A0A1D8PCG9		Mrs7p	3.86855	3.86161	3.92624	3.997	2.43136	1.76418	3.18355	2.42647	2.45489	2.42565	2.48709	3.29502	3.31649	3.35189	3.48409
C1_01330C	DUT1	P0CY19		Deoxyuridine 5'-triphosphate nucleotidohydrolase (dUTPase) (EC 3.6.1.23) (dUTP pyrophosphatase)	4.20956	4.02438	4.00849	4.08378	1.5682	1.22789	2.68034	2.40739	2.44248	2.3738	2.51343	3.61695	3.46687	3.38229	3.5972
C1_01350C	TIF1	P87206		ATP-dependent RNA helicase eIF4A (EC 3.6.4.13) (Eukaryotic initiation factor 4A) (eIF-4A) (Translation initiation factor 1)	4.66003	4.60328	4.68572	4.71708	1.53148	1.64933	3.07664	3.18079	3.18758	3.09836	3.12851	4.84082	4.79086	4.78408	4.84559
C1_01360C	C1_01360C	A0A1D8PCG4		Glycogenin glucosyltransferase	4.01712	4.50681	4.07862	4.23293	2.3927	1.88024	3.2971	1.89244	1.78489	2.17339	2.09238	2.90956	3.2917	3.252	3.32531
C1_01370C	RPS21B	A0A1D8PCG7	Ribosomal proteins	40S ribosomal protein S21	4.09502	4.32688	4.07727	3.8922	1.59106	0.982271	2.80618	3.34837	3.35439	3.2451	3.32121	4.44338	4.68127	4.32236	4.21341
C1_01380C	TRM2	A0A1D8PCG3		Trm2p	3.83698	2.93673	4.00129	3.87804	2.60314	1.79518	3.2188	1.66885	1.72128	1.53716	1.51024	2.50583	1.65801	2.53845	2.38828
C1_01390C	HOT1	A0A1D8PCG5		GCR1_C domain-containing protein	1.31536	1.30795	3.08629	2.33057	2.60314	1.83315	3.26079	1.68464	1.69205	1.73325	1.73013	0	0	1.81954	1.0607
C1_01450W	ABC1	A0A1D8PCI9		Protein kinase	5.07095	4.94054	4.57837	4.75402	1.87506	1.80618	3.23045	2.30852	2.22093	2.43104	2.27115	4.37947	4.16147	4.00941	4.02516
C1_01460W	C1_01460W	A0A1D8PCH1		ArAE_2 domain-containing protein	2.75111	3.38692	2.97914	1.33155	1.61278	2.05038	3.47392	1.65543	1.5425	1.76516	1.66845	1.40654	1.92942	1.74429	0
C1_01470W	C1_01470W	A0A1D8PCH2		mRNA-binding protein	4.95469	4.94411	4.95536	5.26858	1.85733	1.68124	3.11227	2.22766	2.17301	2.23898	2.20649	4.18234	4.11712	4.19435	4.47507
C1_01480C	RPS21	Q5A900	Ribosomal proteins	Ribosomal 40S subunit protein S2	2.89466	3.08019	3.84173	3.01829	1.95904	1.42975	2.87448	3.59333	3.58889	3.51605	3.54059	3.48799	3.66908	4.35778	3.55889
C1_01490W	C1_01490W	Q5A8Z9		Uncharacterized protein	4.59573	4.54348	4.62615	4.73366	1.76343	1.33846	2.7796	2.98349	2.88487	3.20972	3.18771	4.57922	4.42835	4.83587	4.92138
C1_01520C	SOD2	Q5A8Z4		Superoxide dismutase (EC 1.15.1.1)	3.51908	3.53217	3.26831	3.18434	1.59106	1.4183	2.84757	2.53668	2.66621	2.65726	2.81108	3.05576	3.19838	2.92557	2.99542
C1_01530C	C1_01530C	A0A1D8PCI5		Arginine--tRNA ligase	4.74308	4.56553	4.73094	4.87427	1.80618	1.84942	3.27138	2.5128	2.5306	2.41803	2.39093	4.25589	4.09613	4.14897	4.2652
C1_01540W	C1_01540W	Q5A8Z2		UBA domain-containing protein	4.02829	4.33482	3.94517	4.20787	2.41664	1.8488	3.26717	1.57594	1.65994	1.63746	1.66574	2.60423	2.99476	2.58263	2.87361
C1_01550W	VPS17	Q5A8Z0		Vacuolar protein sorting-associated protein 17	3.48334	3.53729	3.6925	3.76771	1.79239	1.77743	3.19285	1.66279	1.71191	1.71912	1.77261	2.14613	2.2492	2.41162	2.54033
C1_01560W	SIZ1	A0A1D8PCK0		SUMO ligase	3.9733	4.07365	4.28814	4.43583	2.16137	2.24155	3.66624	1.63948	1.69015	1.65634	1.67493	2.61278	2.7638	2.94448	3.11076
C1_01580W	C1_01580W	Q5A8Y6		Mitochondrial 54S ribosomal protein YmL23	4.44478	4.24083	4.60254	4.4337	1.50515	1.3075	2.72428	2.31288	2.47463	2.16514	2.39049	3.75766	3.71546	3.76768	3.82419
C1_01590C	C1_01590C	Q5A8Y5		DNA-directed RNA polymerase subunit beta (EC 2.7.7.6)	4.54998	4.42918	4.57873	4.74554	1.92942	2.14551	3.56867	2.0911	2.08662	2.12379	2.11793	3.64108	3.51581	3.70252	3.86347
C1_01600W	MRP20	A0A1D8PCJ1		Mitochondrial 54S ribosomal protein YmL41	4.01748	3.54868	3.96953	3.82234	1.38021	1.53656	2.94498	2.27929	2.44055	2.1969	2.36419	3.29677	2.98923	3.16643	3.18653
C1_01610C	C1_01610C	A0A1D8PCI8		Protein YOP1	1.65671	2.55325	3.48596	3.50507	2.11059	1.51587	3.02243	1.34329	1.18711	1.55345	1.49925	0	0.740363	2.03941	2.00432
C1_01620C	C1_01620C	A0A1D8PCJ0		Uncharacterized protein	4.85011	4.95877	4.61221	4.50084	2.96379	1.57171	2.99913	1.77034	1.72737	1.77881	1.93754	3.62045	3.68614	3.39102	3.43838
C1_01630W	C1_01630W	A0A1D8PCJ4		CIA30 domain-containing protein	2.71776	2.89272	2.94296	2.96555	2.15836	1.4133	2.83442	2.48636	2.25186	2.55672	2.32225	2.20412	2.14457	2.49969	2.2878
C1_01650W	ISN1	Q5A8X9		IMP-specific 5'-nucleotidase 1 (EC 3.1.3.99)	1.27336	2.98806	3.29495	1.15959	2.08991	1.71933	3.14051	1.72664	1.77909	1.85581	1.84041	0	1.76716	2.15076	0
C1_01680C	FYV4	Q5A8X7		Protein FYV4, mitochondrial	4.00467	4.01608	4.04431	3.87413	1.80618	1.29667	2.70927	2.39578	2.46708	2.23399	2.45036	3.40045	3.48316	3.2783	3.32449
C1_01690C	LSC1	Q5A8X6		Succinate--CoA ligase [ADP-forming] subunit alpha, mitochondrial (EC 6.2.1.5) (Succinyl-CoA synthetase subunit alpha) (SCS-alpha)	4.57507	4.57742	4.67764	4.87331	1.83251	1.52763	2.98722	2.9067	2.86323	2.93358	2.82391	4.48177	4.44066	4.61121	4.69722
C1_01700W	ARP8	A0A1D8PCJ9		Actin-related protein 8	5.74854	5.64617	5.8691	6.01914	2.82217	2.08386	3.50515	1.72648	1.74056	1.78127	1.74806	4.47502	4.38673	4.65037	4.7672
C1_01740W	CTN1	Q59T80		Carnitine O-acetyltransferase	6.16746	6.87865	6.53206	6.10638	2.07188	1.95569	3.37785	1.59659	0.956917	1.18525	1.82557	4.76406	4.83557	4.71731	4.93195
C1_01790W	SWI4	A0A1D8PCM9		SBF complex DNA-binding subunit	4.16805	3.9903	3.78781	4.09732	1.90309	2.05843	3.50718	1.80114	1.71599	1.87495	1.76362	2.96918	2.70629	2.66276	2.86094
C1_01800W	C1_01800W	Q59T87		Uncharacterized protein	4.15563	4.30065	4.22426	4.11697	1.79239	1.42975	2.85673	1.81402	1.90617	1.80977	1.89755	2.96965	3.20683	3.03403	3.01452
C1_01820C	C1_01820C	Q59T89		TFIIH complex kinase subunit	3.96638	3.75514	4.18996	4.19806	1.98677	1.66181	3.07445	1.34537	1.47017	1.33638	1.36005	2.31175	2.22531	2.52634	2.55811
C1_01830C	UBC8	Q59T91		E2 ubiquitin-conjugating protein	4.65955	4.77973	4.80794	4.78047	2.40824	1.33244	2.7574	2.1776	2.13482	2.14028	2.15803	3.83715	3.91455	3.94822	3.93849
C1_01840C	C1_01840C	Q59T92		Uncharacterized protein	3.2615	3.38812	0.883123	3.23804	2.35984	1.32838	2.74351	2.09068	1.6856	2.11688	1.97415	2.35218	2.07372	0	2.21219
C1_01850C	C1_01850C	Q59T93		RRM domain-containing protein	3.96105	1.32547	3.42338	3.73376		1.49415	2.91908	1.81565	1.67453	1.76555	1.74119	2.7767	0	2.18893	2.47494
C1_01860W	C1_01860W	Q59T94		Uncharacterized protein	3.92723	3.89893	4.12028	4.11074	1.44716	1.53148	2.96237	2.04195	2.17295	2.0617	2.11856	2.96918	3.07188	3.18199	3.2293
C1_01870C	CYS4	Q59T95		Cystathionine beta-synthase (EC 4.2.1.22)	5.43485	5.62744	5.35926	5.30197	1.98227	1.73159	3.17319	2.57795	2.5069	2.51191	2.43512	5.0128	5.13434	4.87116	4.73709
C1_01900C	C1_01900C	A0A1D8PCL3		Uncharacterized protein	5.02781	4.96304	4.98023	4.95342	1.77815	1.75358	3.18099	1.46912	1.53202	1.52863	1.5545	3.49693	3.49506	3.50887	3.50792
C1_01910W	C1_01910W	A0A1D8PCL4		Uncharacterized protein	4.64281	4.62721	4.59097	4.71947	2.65418	1.60097	3.02694	2.1494	2.1657	2.07391	2.01365	3.79222	3.79292	3.66488	3.73312
C1_01930W	C1_01930W	A0A1D8PCL8		AMPK1_CBM domain-containing protein	5.05525	5.07711	4.64588	4.75694	1.86923	1.60853	3.14176	1.13871	1.0814	1.76439	1.7805	3.19396	3.15851	3.41027	3.53744
C1_01940C	C1_01940C	Q59TA2		Signal recognition particle subunit	8.26906	8.15687	8.14216	8.11938	1.62325	1.26951	2.70415	-1.6882	-1.6505	-1.48856	-1.37818	3.58087	3.50637	3.6536	3.74119
C1_01980W	HGT1	A0A1D8PCL1		High-affinity glucose transporter 1	4.27276	4.25607	4.54723	4.93031	1.9345	1.78247	3.21405	2.50383	2.71915	2.5139	2.12709	3.77659	3.97522	4.06113	4.0574
C1_02000W	C1_02000W	A0A1D8PCP9		Uncharacterized protein	3.24575	2.69947	3.47415	3.60745	2.65418	1.58092	3.00043	1.95565	2.05258	1.96833	2.02399	2.2014	1.75205	2.44248	2.63144
C1_02030C	C1_02030C	Q59TA9		Cytochrome b5 heme-binding domain-containing protein	3.88913	4.49942	4.0348	4.28705	2.24055	1.21484	2.6464	1.55256	1.55308	1.50926	1.50218	2.4417	3.0525	2.54407	2.78923
C1_02040C	C1_02040C	A0A1D8PCM4		Putative ubiquitin-specific protease	4.04008	4.15829	3.55823	4.55113	2.07918	1.97589	3.3934	1.7495	1.49877	1.66318	1.47805	2.78958	2.65706	2.22141	3.02918
C1_02050C	PHO91	Q59VZ6		Pho91p	2.77029	3.37661	1.01902	3.26489	2.3032	1.97818	3.41196	1.92431	1.8882	1.98098	1.9198	1.69461	2.26482	0	2.18469
C1_02110C	HGT2	Q59VZ0		Hgt2p	3.63138	3.98841	3.80171	4.48427	2.15229	1.78104	3.21405	3.40187	2.83441	3.27579	2.48747	4.03324	3.82282	4.0775	3.97174
C1_02130C	GAL1	Q59VY8		Galactokinase	4.94141	5.26899	5.2562	5.29163	2.2014	1.75664	3.18949	2.83297	2.90178	2.83047	2.78721	4.77439	5.17077	5.08667	5.07884
C1_02150W	GAL10	A0A1D8PCN0		Bifunctional UDP-glucose 4-epimerase/aldose 1-epimerase	4.78941	4.70359	4.79429	4.85044	1.76343	1.87737	3.30685	3.05893	3.05775	3.12547	3.06332	4.84834	4.76134	4.91976	4.91376
C1_02160W	C1_02160W	Q59VY5		TRAPP subunit	0.71705	0.464788	2.07255	0.562173	1.95904	1.26482	2.70415	2.28295	2.53521	2.39727	2.43783	0	0	1.46982	0
C1_02170C	GAL102	Q59VY4		Gal102p	5.75626	6.01012	6.46739	6.83731	2.1038	1.56229	2.98318		-0.297474	-0.316326	-0.812205	2.75626	2.71265	3.15106	3.0251
C1_02180W	GAL7	A0A1D8PCM2		Galactose-1-phosphate uridylyltransferase (EC 2.7.7.12)	4.30849	4.31276	4.43105	4.66833	2.32222	1.65031	3.06446	3.0977	3.04244	3.12275	2.83227	4.40619	4.3552	4.5538	4.5006
C1_02190W	ABP140	Q59VY2		Methyltransferase-like protein (EC 2.1.1.-)	3.78494	3.64739	3.64703	3.67828	1.82607	1.56467	2.9722	1.88344	1.9278	1.7439	1.73669	2.66839	2.57519	2.39094	2.41497
C1_02220C	C1_02220C	Q59VX9		NAD(P)H-hydrate epimerase (EC 5.1.99.6) (NAD(P)HX epimerase)	4.14682	4.31959	4.71038	4.78443	2.98767	1.45788	3.00432	1.745	1.73693	1.84094	1.80261	2.89182	3.05652	3.55133	3.58704
C1_02230W	SEP7	Q59VX8		Septation protein 7 (Seventh homolog of septin 1)	4.8006	4.90948	4.96911	4.94339	2.74429	1.87967	3.30363	1.67897	1.83805	1.71245	1.84212	3.47958	3.74753	3.68156	3.78551
C1_02240W	C1_02240W	Q59VX7		Karyopherin beta	3.80859	4.11496	4.30707	4.22378	2.98091	1.98453	3.41946	1.63624	1.78184	1.61201	1.73022	2.44483	2.8968	2.91908	2.954
C1_02260C	AGE3	A0A1D8PCP6		Age3p	5.12	5.2317	5.07941	5.01021	2.0607	1.62221	3.05652	2.18957	2.19129	2.19154	2.32379	4.30957	4.42299	4.27095	4.334
C1_02270C	C1_02270C	A0A1D8PCP4		Uncharacterized protein	4.3169	4.59797	4.35716	4.47714	1.54407	1.48714	2.94349	1.93058	1.60137	2.03483	1.75889	3.24748	3.19934	3.39199	3.23603
C1_02290C	C1_02290C	A0A1D8PCP8		ATP synthase complex assembly protein	5.25586	4.84267	5.25248	5.11934	2.03743	1.67486	3.08314	1.76246	1.89484	1.75862	1.8679	4.01833	3.73751	4.01111	3.98724
C1_02300W	C1_02300W	Q59VX1		Prefolding complex chaperone subunit	4.40632	4.22083	3.88704	3.72437	2.03743	1.13988	2.56229	1.79302	1.92669	1.80931	1.85656	3.19934	3.14752	2.69636	2.58092
C1_02310C	GON7	Q59W04		EKC/KEOPS complex subunit GON7	4.31928	4.41359	3.99956	3.92573	1.70757	1.1271	2.56229	1.74424	1.75032	1.74552	1.83167	3.06352	3.16391	2.74507	2.7574
C1_02320C	C1_02320C	A0A1D8PCP7		Bifunctional fructose-2,6-bisphosphate 2-phosphatase/6-phosphofructo-2-kinase	3.97569	4.04009	3.87843	4.03846	2.07188	1.79099	3.21245	2.06511	2.02456	2.23817	2.07011	3.0408	3.06465	3.11661	3.10857
C1_02330C	C1_02330C	A0A1D8PCQ5	Ribosomal proteins	Ribosomal 60S subunit protein L26B	4.3262	4.33665	4.07166	4.13231	1.88081	1.15229	2.92737	3.24708	3.23563	3.12919	3.24385	4.57328	4.57228	4.20085	4.37616
C1_02400C	MNN11	A0A1D8PCR3		Alpha-1,6-mannosyltransferase	4.95529	5.68522	5.99148	6.62633	2.36922	1.71181	3.12516	0.654833	0.782013	0.54929	-0.0965149	2.61013	3.46724	3.54077	3.52982
C1_02410C	C1_02410C	A0A1D8PCS2		Uncharacterized protein	4.37057	4.20742	4.25724	4.15875	2.23045	1.60423	3.0306	0.889497	0.826006	0.757704	0.878676	2.26007	2.03342	2.01494	2.03743
C1_02420C	GSC1	A0A1D8PCT0		1,3-beta-glucan synthase	5.53772	5.66698	5.52675	5.67143	1.716	2.33846	3.75534	1.53106	1.45514	1.482	1.5356	4.06878	4.12212	4.00875	4.20703
C1_02430C	C1_02430C	A0A1D8PCQ3		Eukaryotic translation initiation factor 2A (eIF-2A)	4.6703	4.53063	4.71988	4.73658	2.24304	1.85126	3.28578	2.01869	2.07662	1.98056	2.00662	3.689	3.60724	3.70044	3.7432
C1_02440C	C1_02440C	A0A1D8PCR2		Ubiquitin-specific protease	3.06422	3.36286	3.30585	3.31273	2.02119	1.57749	3.00043	1.99078	1.84397	1.96599	1.91258	2.055	2.20683	2.27184	2.22531
C1_02450C	C1_02450C	A0A1D8PCR9		C2H2-type domain-containing protein	4.19354	4.17503	3.57711	3.89547	1.61278	1.31597	2.72428	2.29929	2.32003	2.19886	2.18552	3.49283	3.49506	2.77597	3.08099
C1_02460W	RPL10	Q5AIB8	Ribosomal proteins	Ribosomal 60S subunit protein L10	4.27131	4.36278	4.29906	4.2511	1.30103	1.4014	2.82086	3.33119	3.33041	3.27181	3.29299	4.6025	4.69319	4.57086	4.5441
C1_02480W	PMM1	P31353		Phosphomannomutase (PMM) (EC 5.4.2.8)	4.57775	4.68819	4.59858	4.38941	1.63347	1.4624	2.87967	2.64111	2.70631	2.61699	2.7632	4.21886	4.3945	4.21557	4.15261
C1_02490C	C1_02490C	Q5AIB5		Uncharacterized protein	5.66751	5.35871	5.50522	5.33929	1.57978	1.88874	3.30557	1.62774	1.74904	1.63347	1.7516	4.29525	4.10775	4.1387	4.09089
C1_02500W	C1_02500W	Q5AIB4		Uncharacterized protein	1.3494	3.73575	3.79247	3.6221	1.81954	1.37475	2.79657	1.6506	1.77345	1.7958	1.95769	0	2.5092	2.58827	2.57978
C1_02510W	C1_02510W	Q5AIB3		Protein transport protein BOS1	5.19607	5.15425	4.92959	4.75979	1.89209	1.45025	2.86392	1.5209	1.72711	1.57935	1.84221	3.71696	3.88136	3.50893	3.60201
C1_02520W	SCW4	Q5AIB2		Scw4p	5.28919	6.12851	4.39441	5.13122	2.27646	1.75967	3.23955	0.935477	0.130367	1.69691	0.898166	3.22466	3.25888	3.09132	3.02938
C1_02530C	DIP5	A0A1D8PCR4		Dip5p	3.11877	3.4147	3.18167	3.7705	2.00432	1.81425	3.24551	2.83884	2.59856	2.65083	2.42388	2.95761	3.01326	2.83251	3.19438
C1_02590C	SNZ1	Q5AIA6		Pyridoxine biosynthesis protein	5.28909	5.16091	4.92357	5.0617	1.79239	1.50243	2.94349	2.92141	2.69322	3.10263	2.88774	5.2105	4.85413	5.0262	4.94944
C1_02600W	SNO1	A0A1D8PCS7		Putative pyridoxal 5'-phosphate synthase	0.992393	1.08784	2.51079	2.81366	1.65321	1.45332	2.87448	2.00761	1.91216	2.02703	1.93064	0	0	1.53782	1.74429
C1_02620C	HOM6	Q5AIA2		Homoserine dehydrogenase (HDH) (EC 1.1.1.3)	5.11415	4.8205	4.82236	4.78421	1.50515	1.58883	3.03302	2.6803	2.72424	2.72778	2.81542	4.79445	4.54474	4.55014	4.59963
C1_02630C	EXG2	Q5AIA1		Glucan 1,3-beta-glucosidase 2 (EC 3.2.1.58) (Exo-1,3-beta-glucanase 2)	4.43081	4.05298	4.41802	4.21476	1.75587	1.7364	3.15806	1.23242	1.61213	0.763823	1.07749	2.66323	2.66511	2.18184	2.29226
C1_02640C	TOM20	Q5AIA0		Tom20p	3.89339	3.88727	3.5502	3.80817	1.88649	1.27875	2.71181	2.60876	2.6749	2.52607	2.642	3.50215	3.56217	3.07628	3.45017
C1_02650W	C1_02650W	A0A1D8PCU5		Uncharacterized protein	4.50651	4.58968	4.66519	4.59196	1.63347	1.35411	2.7796	2.62474	2.73905	2.57831	2.74593	4.13125	4.32873	4.2435	4.3379
C1_02660C	MGM101	Q5AI97		Mitochondrial genome maintenance protein MGM101	4.34475	4.45549	4.44559	4.58831	1.716	1.48714	2.91751	1.93022	1.9401	1.85944	1.88107	3.27497	3.39559	3.30503	3.46938
C1_02710W	FRS2	A0A1D8PCT4		Phenylalanine--tRNA ligase subunit alpha	4.56545	4.61517	4.75365	4.77716	1.69897	1.75128	3.17319	2.59798	2.67064	2.52286	2.64092	4.16343	4.28582	4.27651	4.41808
C1_02720W	C1_02720W	Q5AI92		C2H2-type domain-containing protein	4.38474	3.72941	3.80462	3.7911	1.73239	1.66181	3.07664	1.65724	1.67457	1.68883	1.72873	3.04198	2.40398	2.49346	2.51983
C1_02750C	C1_02750C	A0A1D8PCV8		Uncharacterized protein	5.18528	5.03512	4.84282	5.1113	2.14301	1.95376	3.37785	1.8173	1.85992	1.90397	1.85465	4.00258	3.89504	3.74679	3.96595
C1_02760W	GET3	P0CB54		ATPase GET3 (EC 3.6.-.-) (Arsenical pump-driving ATPase) (Arsenite-stimulated ATPase) (Golgi to ER traffic protein 3) (Guided entry of tail-anchored proteins 3)	3.8092	3.66762	4.0178	3.94303	1.6721	1.5977	3.02202	2.47217	2.53731	2.36132	2.55342	3.28137	3.20493	3.37912	3.49645
C1_02780W	C1_02780W	Q5AI87		Carboxymethylenebutenolidase	3.2755	3.46128	3.13985	3.58847	1.97772	1.45332	2.87967	2.05491	1.98433	2.22937	2.25507	2.33041	2.4456	2.36922	2.84354
C1_02790W	TIF34	Q5AI86		Eukaryotic translation initiation factor 3 subunit I (eIF3i) (Eukaryotic translation initiation factor 3 39 kDa subunit homolog) (eIF-3 39 kDa subunit homolog)	4.75241	4.76567	4.7859	4.65363	1.74819	1.58206	3.02202	2.5883	2.57628	2.50232	2.49132	4.34071	4.34195	4.28822	4.14495
C1_02810W	RAD16	Q5AI84		DNA repair protein	3.08908	3.38568	3.22259	3.35947	1.77815	1.98811	3.4079	1.41607	1.42387	1.60671	1.45345	1.50515	1.80956	1.8293	1.81291
C1_02820W	LYS2	A0A1D8PCV7		L-aminoadipate-semialdehyde dehydrogenase	5.52084	5.41099	5.32038	5.46355	1.72428	2.19089	3.62469	1.92785	1.89939	1.91575	1.90079	4.44868	4.31039	4.23613	4.36434
C1_02850W	VTS1	Q5AI80		Protein VTS1	5.35545	5.29724	5.26977	5.39953	2.21748	1.87332	3.30942	1.5044	1.55008	1.59367	1.5109	3.85986	3.84733	3.86344	3.91044
C1_02860C	YKT6	Q5AI79		Palmitoyltransferase	4.8959	4.92833	5.12891	4.60425	1.86332	1.35984	2.7796	2.34019	2.4257	2.27836	2.50445	4.2361	4.35403	4.40727	4.1087
C1_02870W	YPT7	Q5AI78		Ypt7p	2.76873	3.34454	2.77433	1.25668	2.21748	1.50515	2.93752	1.74316	1.74888	1.69549	1.74332	1.51188	2.09342	1.46982	0
C1_02880C	MIA40	O94030		Mitochondrial intermembrane space import and assembly protein 40 (Mitochondrial import inner membrane translocase TIM40)	3.79535	4.40455	4.29395	4.60776	2.29885	1.4456	2.87967	2.38276	2.44456	2.32068	2.3765	3.17811	3.84911	3.61463	3.98426
C1_02890C	C1_02890C	Q5AI75		Uncharacterized protein	4.1212	4.19284	4.51773	4.39872	1.72428	1.15229	2.57287	1.95178	1.89316	1.93413	1.87866	3.07298	3.086	3.45186	3.27738
C1_02920W	CDC73	A0A1D8PCW7		Cdc73p	3.60309	3.36479	3.88025	3.90544	1.65321	1.62839	3.0461	1.95501	1.99219	1.9704	1.98915	2.55811	2.35698	2.85065	2.89459
C1_02930C	MST1	A0A1D8PCV0		Threonine--tRNA ligase	3.39436	4.72835	5.17323	4.18464	1.72428	1.7185	3.13577	1.70601	1.79475	1.59173	1.73155	2.10037	3.5231	3.76496	2.91619
C1_02940C	C1_02940C	Q5AI68		Uncharacterized protein	3.72156	4.4386	4.66231	4.6577	1.86332	1.26951	2.71433	1.89281	1.91685	1.87752	1.96467	2.61437	3.35545	3.53983	3.62237
C1_02970W	C1_02970W	A0A1D8PCX5		Aminotran_5 domain-containing protein	3.37349	3.74912	3.88472	3.78192	1.68124	1.68215	3.10209	2.16746	2.21936	2.13398	2.21196	2.54095	2.96848	3.0187	2.99388
C1_02980W	GOR1	A0A1D8PCW3		Glyoxylate reductase	4.00326	4.53493	3.96271	4.28407	1.90849	1.57749	3.01199	2.20424	1.64562	2.34511	1.93552	3.2075	3.18056	3.30782	3.21958
C1_03010W	RPP1A	Q9HFQ7	Ribosomal proteins	60S acidic ribosomal protein P1-A (CaRP1A)	0.921394	1.91227	1.35612	1.69509	1.73239	1.04139	2.50515	3.48515	3.58258	3.41473	3.48818	1.40654	2.49485	1.77085	2.18327
C1_03020C	RPL13	O59931	Ribosomal proteins	60S ribosomal protein L13	3.47833	3.8313	4.02537	3.21772	1.59106	1.36173	2.7839	3.68293	3.70746	3.58113	3.61229	4.16126	4.53876	4.6065	3.83001
C1_03030W	RPS16A	A0A1D8PCW6	Ribosomal proteins	Ribosomal 40S subunit protein S16A	4.23403	4.25416	3.95224	4.11309	1.70757	1.1959	2.87795	3.43417	3.46894	3.33402	3.36033	4.66821	4.7231	4.28625	4.47342
C1_03050W	C1_03050W	A0A1D8PCY2		Uncharacterized protein	4.09063	4.74594	4.68713	4.72456	2.26007	2.07445	3.499	1.22006	1.31908	1.29605	1.32194	2.31069	3.06502	2.98318	3.0465
C1_03060C	TSR2	Q5AI56	Ribosomal proteins	Tsr2p	3.12385	3.73657	3.99649	4.11308	1.74036	1.38021	2.79865	1.72124	1.74986	1.35182	1.38247	1.8451	2.48643	2.3483	2.49554
C1_03070C	ORC1	A0A1D8PCY1		Origin recognition complex subunit 1	4.33823	3.69105	4.57374	4.18784	1.91381	1.95952	3.38328	0.413818	0.985642	0.561394	0.977997	1.75205	1.67669	2.13513	2.16584
C1_03090W	RPS1	P40910	Ribosomal proteins	40S ribosomal protein S1 (S3aE)	5.08565	5.27709	5.266	5.29051	1.57978	1.4624	2.88649	3.128	3.09964	3.03499	3.03735	5.21365	5.37673	5.30099	5.32785
C1_03100W	C1_03100W	A0A1D8PCX0		Uncharacterized protein	7.651	7.35235	7.11664	7.07726	1.83885	2.19948	3.64797	-0.677637	-0.326528	0.0491825	0.181378	3.97336	4.02582	4.16582	4.25864
C1_03110W	RPL6	A0A1D8PCX8	Ribosomal proteins	60S ribosomal protein L6	5.41787	5.50998	5.55501	5.52364	1.89763	1.29667	2.95036	2.17823	2.11411	1.95704	2.07794	4.5961	4.62409	4.51204	4.60158
C1_03120W	C1_03120W	Q5AI48		FAS1 domain-containing protein CaO19.3004	4.44069	4.71109	4.1981	4.52524	1.72428	1.66652	3.09061	1.99003	1.93556	2.01648	2.00604	3.43072	3.64665	3.21458	3.53129
C1_03130C	GGA2	A0A1D8PCX6		Phosphatidylinositol 4-phosphate-binding protein	4.61071	5.53812	4.93214	4.72698	2.31387	1.8109	3.24403	1.95626	2.02996	2.0647	2.07937	3.56697	4.56808	3.99684	3.80635
C1_03150C	C1_03150C	A0A1D8PCZ2		Uncharacterized protein	4.9992	5.38287	4.99538	5.1551	1.92428	1.39967	2.87795	0.878174	0.288298	1.35786	1.14134	2.87737	2.67117	3.35324	3.29645
C1_03190C	ECM33	A0A1D8PCY4		Ecm33p	5.11621	4.9251	4.97321	5.01108	1.78533	1.63849	3.33425	2.68323	2.81297	2.69828	2.78469	4.79944	4.73807	4.67149	4.79577
C1_03200C	ARO80	A0A1D8PCY0		Aro80p	6.00765	6.16225	5.83518	6.06944	2.08279	2.07298	3.50474	-1.08596	-0.974732	-0.857458	-1.00685	1.92169	2.18752	1.97772	2.06258
C1_03210C	CDC12	A0A1D8PCY5		Septin	6.18821	6.21037	6.16463	5.95584	1.85126	1.66087	3.13194	1.08578	1.19934	0.98005	1.25923	4.274	4.40971	4.14468	4.21507
C1_03220C	BMH1	O42766		14-3-3 protein homolog	5.34781	5.43342	5.43587	5.53974	1.99564	1.46982	2.89982	2.42217	2.42602	2.45329	2.38571	4.76998	4.85944	4.88916	4.92545
C1_03230C	ARX1	Q5AI37	Ribosomal proteins	Probable metalloprotease ARX1 (EC 3.-.-.-) (Associated with ribosomal export complex protein 1)	5.26457	4.98998	5.238	5.60544	1.63347	1.79379	3.22891	1.62692	1.55909	1.42034	1.10582	3.89148	3.54906	3.65835	3.71126
C1_03240W	C1_03240W	A0A1D8PD02		Uncharacterized protein	6.99056	5.09167	6.95624	6.90719	1.87506	1.2014	2.62839	-1.32125		-1.4128	-1.30242	2.66932	2.09167	2.54345	2.60477
C1_03250C	SPP1	Q5AI35		Spp1p	6.48409	7.98082	6.27909	6.65919	2.26245	1.67302	3.08636	-0.333484	-1.74719	-0.494828	-0.59286	3.1506	3.23363	2.78426	3.06633
C1_03280W	C1_03280W	Q5AI30		37S ribosomal protein S24, mitochondrial	4.51582	5.41894	5.55304	5.2359	1.65321	1.55388	2.96942	2.23315	2.40191	2.19964	2.35565	3.74896	4.82084	4.75268	4.59155
[truncated: 3,073 more rows]
